# Supplementary material for: In vitro demonstration of broad host range mobile genetic elements transferring antibiotic resistance from the human microbiome
Source: bioRxiv or medRxiv preprint supplement (doi:10.1101/2022.01.18.476738), 2022-01-18
Supplement: Supplementary file [file media-5.pdf]

DEFINITION Integrative and conjugative element ICE\_1

CDS complement(1..1772)  
 /color=9  
 /locus\_tag="B40\_04892"  
 /note="Transposon Tn1000 resolvase, similar to AA  
 sequence:UniProtKB:P03012 protein motif:CLUSTERS:PRK13413  
 protein motif:Pfam:PF00239.15"  
 /product="Transposon Tn1000 resolvase [DDE recombinase]"  
 /"ID=B40\_04892  
 /gene="tnpR""  
 /protein\_id="gnl|SC|B40\_04892"  
 /codon\_start=1

fasta\_record 1..61464  
 /ID=B40|SC|contig000003  
 /color=5

CDS complement(2360..2587)  
 /color=7  
 /locus\_tag="B40\_04893"  
 /note="Helix-turn-helix domain, protein  
 motif:Pfam:PF12645.1"  
 /product="Helix-turn-helix domain [transcriptional  
 regulator]"  
 /"ID=B40\_04893  
 /protein\_id="gnl|SC|B40\_04893""  
 /codon\_start=1

CDS complement(2580..3008)  
 /color=7  
 /locus\_tag="B40\_04894"  
 /note="RNA polymerase sigma factor Sigma-70 region 4,  
 protein motif:TIGRFAMs:TIGR02937 protein  
 motif:Pfam:PF08281.6"  
 /product="RNA polymerase sigma factor Sigma-70 region 4  
 [transcriptional regulator]"  
 /"ID=B40\_04894  
 /protein\_id="gnl|SC|B40\_04894""  
 /codon\_start=1

CDS complement(3377..3544)  
 /ID=B40\_04895  
 /color=1  
 /locus\_tag="B40\_04895"  
 /note="Hypothetical protein"  
 /product="hypothetical protein"  
 /protein\_id="gnl|SC|B40\_04895"  
 /codon\_start=1

CDS complement(3492..4472)  
 /color=7  
 /locus\_tag="B40\_04896"  
 /note="AraC family transcriptional regulator  
 Helix-turn-helix domain, similar to AA  
 sequence:UniProtKB:P28816 protein motif:CLUSTERS:PRK15121  
 protein motif:Cdd:COG3449 protein motif:TIGRFAMs:TIGR04094  
 protein motif:Pfam:PF12833.1"  
 /product="AraC family transcriptional regulator  
 Helix-turn-helix domain [transcriptional regulator]"  
 /"ID=B40\_04896  
 /protein\_id="gnl|SC|B40\_04896""  
 /codon\_start=1

CDS complement(4838..5029)  
 /ID=B40\_04897  
 /color=1  
 /locus\_tag="B40\_04897"  
 /note="Hypothetical protein"  
 /product="hypothetical protein DUF4177 containing  
 protein"  
 /protein\_id="gnl|SC|B40\_04897"  
 /codon\_start=1

CDS complement(5100..5393)  
 /color=8  
 /locus\_tag="B40\_04898"  
 /note="Predicted ester cyclase SnoaL-like polyketide  
 cyclase, protein motif:Cdd:COG5485 protein  
 motif:TIGRFAMs:TIGR02096 protein motif:Pfam:PF07366.6"  
 /product="Predicted ester cyclase SnoaL-like polyketide  
 cyclase [ester cyclase]"  
 /"ID=B40\_04898  
 /protein\_id="gnl|SC|B40\_04898""  
 /codon\_start=1

CDS complement(5412..5510)  
 /ID=B40\_04899  
 /color=1  
 /locus\_tag="B40\_04899"  
 /note="Hypothetical protein"  
 /product="hypothetical protein"  
 /protein\_id="gnl|SC|B40\_04899"  
 /codon\_start=1

CDS complement(5580..6194)  
 /color=7  
 /locus\_tag="B40\_04900"

/note="y4mF family Helix-turn-helix, protein  
 motif:TIGRFAMs:TIGR03070 protein motif: Pfam:PF01381.16"  
 /product="y4mF family Helix-turn-helix [transcriptional  
 regulator]"  
 /"ID=B40\_04900  
 /protein\_id="gnl|SC|B40\_04900""  
 /codon\_start=1  
 CDS     complement(6218..6877)  
 /color=8  
 /locus\_tag="B40\_04901"  
 /note="PAP2 superfamily, protein motif: Pfam:PF01569.15"  
 /product="PAP2 superfamily [phosphatase]"  
 /"ID=B40\_04901  
 /protein\_id="gnl|SC|B40\_04901""  
 /codon\_start=1  
 CDS     complement(7160..7876)  
 /color=8  
 /locus\_tag="B40\_04902"  
 /eC\_number=2.1.1.157  
 /note="Sarcosine/dimethylglycine N-methyltransferase,  
 similar to AA sequence: UniProtKB:Q83WC3 protein  
 motif:TIGRFAMs:TIGR02021 protein motif: Pfam:PF08241.6"  
 /product="Sarcosine/dimethylglycine N-methyltransferase  
 [methyltransferase]"  
 /"ID=B40\_04902  
 /protein\_id="gnl|SC|B40\_04902""  
 /codon\_start=1  
 CDS     complement(7998..8624)  
 /color=7  
 /locus\_tag="B40\_04903"  
 /note="Potential acrAB operon repressor, similar to AA  
 sequence: UniProtKB:P0ACS9 protein motif: CLUSTERS:PRK10668  
 protein motif: TIGRFAMs: TIGR03968 protein  
 motif: Pfam: PF00440.17"  
 /product="Potential acrAB operon repressor  
 [transcriptional regulator]"  
 /"ID=B40\_04903  
 /gene="acrR""  
 /protein\_id="gnl|SC|B40\_04903"  
 /codon\_start=1  
 CDS     complement(8914..9054)  
 /ID=B40\_04904  
 /color=1  
 /locus\_tag="B40\_04904"

/note="Hypothetical protein"  
 /product="hypothetical protein"  
 /protein\_id="gnl|SC|B40\_04904"  
 /codon\_start=1  
 CDS complement(9105..10016)  
 /color=8  
 /locus\_tag="B40\_04905"  
 /note="Cadmium cobalt and zinc/H-K antiporter, similar to  
 AA sequence:UniProtKB:O07084 protein  
 motif:CLUSTERS:PRK09509 protein motif:Cdd:COG0053 protein  
 motif:TIGRFAMs:TIGR01297 protein motif:Pfam:PF01545.15"  
 /product="Cadmium cobalt and zinc/H%28 %29-K%28 %29  
 antiporter [heavy metal defense]"  
 /"ID=B40\_04905  
 /gene="czcD""  
 /protein\_id="gnl|SC|B40\_04905"  
 /codon\_start=1  
 CDS complement(10028..10471)  
 /ID=B40\_04906  
 /color=8  
 /locus\_tag="B40\_04906"  
 /note="Hypothetical protein"  
 /product="RibD %28riboflavin biosynthesis%29 family  
 protein [pyrimidine reductase]"  
 /protein\_id="gnl|SC|B40\_04906"  
 /codon\_start=1  
 CDS complement(10582..10938)  
 /ID=B40\_04907  
 /color=7  
 /locus\_tag="B40\_04907"  
 /note="Hypothetical protein"  
 /product="WYL domain-containing protein [transcriptional  
 regulator]"  
 /protein\_id="gnl|SC|B40\_04907"  
 /codon\_start=1  
 CDS complement(10962..11534)  
 /color=7  
 /locus\_tag="B40\_04908"  
 /note="Helix-turn-helix domain, protein  
 motif:CLUSTERS:PRK11886 protein motif:Pfam:PF08279.6"  
 /product="Helix-turn-helix domain [transcriptional  
 regulator]"  
 /"ID=B40\_04908  
 /protein\_id="gnl|SC|B40\_04908""

/codon\_start=1  
 CDS complement(11810..12604)  
 /color=2  
 /locus\_tag="B40\_04909"  
 /eC\_number=2.7.1.95  
 /note="Aminoglycoside 3'-phosphotransferase, similar to AA  
 sequence:UniProtKB:P0A3Y5 protein motif:Cdd:COG3231  
 protein motif:Pfam:PF01636.17"  
 /product="Aminoglycoside 3'-phosphotransferase [antibiotic  
 resistance]"  
 /"ID=B40\_04909  
 /gene="aphA""  
 /protein\_id="gnl|SC|B40\_04909"  
 /codon\_start=1  
 CDS complement(12697..13239)  
 /color=2  
 /locus\_tag="B40\_04910"  
 /note="streptothricin N-acetyltransferase Sat4, protein  
 motif:CLUSTERS:PRK10975 protein motif:TIGRFAMS:TIGR01575  
 protein motif:Pfam:PF00583.18"  
 /product="streptothricin N-acetyltransferase Sat4  
 [antibiotic resistance]"  
 /"ID=B40\_04910  
 /gene="sat4""  
 /protein\_id="gnl|SC|B40\_04910"  
 /codon\_start=1  
 CDS complement(13236..14144)  
 /color=2  
 /locus\_tag="B40\_04911"  
 /eC\_number=2.7.7.-  
 /note="Aminoglycoside 6-adenylyl transferase Streptomycin  
 adenylyl transferase, similar to AA  
 sequence:UniProtKB:P17585 protein motif:Pfam:PF04439.6"  
 /product="Aminoglycoside 6-adenylyltransferase  
 Streptomycin adenylyltransferase [antibiotic resistance]"  
 /"ID=B40\_04911  
 /gene="aadK""  
 /protein\_id="gnl|SC|B40\_04911"  
 /codon\_start=1  
 CDS complement(14177..14785)  
 /color=8  
 /locus\_tag="B40\_04912"  
 /eC\_number=2.1.1.-  
 /note="Uncharacterized methyltransferase ycgJ , similar to

AA sequence:UniProtKB:O31474 protein  
motif:CLUSTERS:PRK08317 protein motif:Cdd:COG4976 protein  
motif:TIGRFAMs:TIGR02072 protein motif:Pfam:PF08241.6"  
/product="Uncharacterized methyltransferase ycgJ  
[methyltransferase]"  
/ID=B40\_04912  
/gene="ycgJ""  
/protein\_id="gnl|SC|B40\_04912"  
/codon\_start=1  
CDS        complement(14769..15524)  
/ID=B40\_04913  
/color=10  
/locus\_tag="B40\_04913"  
/note="Hypothetical protein"  
/product="Replication protein repR [replication  
initiation]"  
/gene="repR"  
/protein\_id="gnl|SC|B40\_04913"  
/codon\_start=1  
ncRNA        15682..15812  
/ID=B40\_04914  
/color=10  
/locus\_tag="B40\_04914"  
/product="Plasmid\_RNAIII [repR repressor]"  
CDS        complement(15919..16158)  
/color=10  
/locus\_tag="B40\_04915"  
/note="Replication initiation protein RepA, protein  
motif:Pfam:PF01381.16"  
/product="Replication initiation protein RepA  
[replication]"  
/ID=B40\_04915  
/gene="repA""  
/protein\_id="gnl|SC|B40\_04915"  
/codon\_start=1  
CDS        complement(16402..16515)  
/ID=B40\_04916  
/color=1  
/locus\_tag="B40\_04916"  
/note="Hypothetical protein"  
/product="hypothetical protein"  
/protein\_id="gnl|SC|B40\_04916"  
/codon\_start=1  
CDS        complement(16520..17257)

```

/color=2
/locus_tag="B40_04917"
/eC_number=2.1.1.184
/note="rRNA adenine N-6-methyltransferase, similar to AA
sequence:UniProtKB:P21236 protein motif:CLUSTERS:PRK00274
protein motif:Cdd:COG0030 protein motif:TIGRFAMs:TIGR00755
protein motif:Pfam:PF00398.14"
/product="rRNA adenine N-6-methyltransferase [antibiotic
resistanc]"
/"ID=B40_04917
/gene="ermB""
/protein_id="gnl|SC|B40_04917"
/codon_start=1
CDS    complement(17886..18251)
/color=1
/locus_tag="B40_04918"
/note="Predicted outer membrane protein LPXTG cell wall
anchor domain, protein motif:Cdd:COG4932 protein
motif:TIGRFAMs:TIGR01167 protein motif:Pfam:PF00746.15"
/product="Predicted outer membrane protein LPXTG cell wall
anchor domain [membrane protein]"
/"ID=B40_04918
/protein_id="gnl|SC|B40_04918""
/codon_start=1
CDS    complement(18251..19165)
/color=8
/locus_tag="B40_04919"
/note="ABC transporter permease, protein
motif:CLUSTERS:PRK05625 protein motif:TIGRFAMs:TIGR00227
protein motif:Pfam:PF01872.11"
/product="ABC transporter permease [transporter]"
/"ID=B40_04919
/protein_id="gnl|SC|B40_04919""
/codon_start=1
CDS    complement(19162..19845)
/ID=B40_04920
/color=8
/locus_tag="B40_04920"
/note="Hypothetical protein"
/product="ABC transporter permease [transporter]"
/protein_id="gnl|SC|B40_04920"
/codon_start=1
CDS    complement(19842..20687)
/color=8

```

/locus\_tag="B40\_04921"  
 /eC\_number=3.6.3.-  
 /note="ABC transporter ATP-binding protein, similar to AA  
 sequence:UniProtKB:O07190 protein motif:CLUSTERS:PRK13536  
 protein motif:Cdd:COG4555 protein motif:TIGRFAMs:TIGR01188  
 protein motif:Pfam:PF00005.21"  
 /product="ABC transporter ATP-binding protein [ATPase]"  
 /"ID=B40\_04921  
 /protein\_id="gnl|SC|B40\_04921""  
 /codon\_start=1  
 CDS        complement(20791..21378)  
 /color=7  
 /locus\_tag="B40\_04922"  
 /note="tetR/arcR family transcriptional regulator, protein  
 motif:CLUSTERS:PRK09975 protein motif:TIGRFAMs:TIGR03968  
 protein motif:Pfam:PF00440.17"  
 /product="tetR/arcR family transcriptional regulator  
 [transcriptional regulator]"  
 /"ID=B40\_04922  
 /protein\_id="gnl|SC|B40\_04922""  
 /codon\_start=1  
 CDS        complement(21450..22307)  
 /color=8  
 /locus\_tag="B40\_04923"  
 /note="Alpha/beta hydrolase family, protein  
 motif:Cdd:COG1647 protein motif:Pfam:PF12697.1"  
 /product="Alpha/beta hydrolase family [hydrolase]"  
 /"ID=B40\_04923  
 /protein\_id="gnl|SC|B40\_04923""  
 /codon\_start=1  
 CDS        complement(22520..23413)  
 /color=4  
 /locus\_tag="B40\_04924"  
 /note="Conjugative transposon protein TcpC, protein  
 motif:Pfam:PF12642.1"  
 /product="Conjugative transposon protein TcpC [mating pair  
 formation]"  
 /"ID=B40\_04924  
 /gene="tcpC""  
 /protein\_id="gnl|SC|B40\_04924"  
 /codon\_start=1  
 CDS        complement(23429..24436)  
 /color=4  
 /locus\_tag="B40\_04925"



/note="Peptidase P60 bifunctional lytic  
 transglycosylase/NlpC/P60 family protein, similar to AA  
 sequence:UniProtKB:P21171 protein motif:CLUSTERS:PRK13914  
 protein motif:Cdd:COG3584 protein motif:Pfam:PF00877.13"  
 /product="Peptidase P60 bifunctional lytic  
 transglycosylase/NlpC/P60 family protein [pepidase]"  
 /"ID=B40\_04925  
 /protein\_id="gnl|SC|B40\_04925""  
 /codon\_start=1  
 CDS        complement(24433..26565)  
 /ID=B40\_04926  
 /color=1  
 /locus\_tag="B40\_04926"  
 /note="Hypothetical protein"  
 /product="YtxH domain-containing protein MFS transporter  
 membrane protein conjugative transposon protein"  
 /protein\_id="gnl|SC|B40\_04926"  
 /codon\_start=1  
 CDS        complement(26565..29015)  
 /color=4  
 /locus\_tag="B40\_04927"  
 /note="Type IV secretion system protein TraC VirB4  
 components, protein motif:Cdd:COG3451 protein  
 motif:TIGRFAMs:TIGR02746 protein motif:Pfam:PF12846.1"  
 /product="Type IV secretion system protein TraC VirB4  
 components [ATPase mating pair formation]"  
 /"ID=B40\_04927  
 /gene="traC""  
 /protein\_id="gnl|SC|B40\_04927"  
 /codon\_start=1  
 CDS        complement(29002..29391)  
 /color=4  
 /locus\_tag="B40\_04928"  
 /note="TcpE family, protein motif:Pfam:PF12648.1"  
 /product="TcpE family [mating pair formation]"  
 /"ID=B40\_04928  
 /gene="tcpE""  
 /protein\_id="gnl|SC|B40\_04928"  
 /codon\_start=1  
 CDS        complement(29556..30059)  
 /color=4  
 /locus\_tag="B40\_04929"  
 /note="Antirestriction protein ArdA, protein  
 motif:Cdd:COG4734 protein motif:Pfam:PF07275.5"

```

/product="Antirestriction protein ArdA [anti-ristriction
modification]"
/"ID=B40_04929
/gene="ardA""
/protein_id="gnl|SC|B40_04929"
/codon_start=1
CDS    complement(30075..30572)
/color=4
/locus_tag="B40_04930"
/note="Antirestriction protein ArdA, protein
motif:Cdd:COG4734 protein motif: Pfam:PF07275.5"
/product="Antirestriction protein ArdA [anti-ristriction
modification]"
/"ID=B40_04930
/gene="ardA""
/protein_id="gnl|SC|B40_04930"
/codon_start=1
CDS    complement(30855..31871)
/ID=B40_04931
/color=1
/locus_tag="B40_04931"
/note="Hypothetical protein"
/product="hypothetical protein"
/protein_id="gnl|SC|B40_04931"
/codon_start=1
CDS    complement(31942..32163)
/ID=B40_04932
/color=1
/locus_tag="B40_04932"
/note="Hypothetical protein"
/product="hypothetical protein"
/protein_id="gnl|SC|B40_04932"
/codon_start=1
CDS    complement(32164..32304)
/color=1
/locus_tag="B40_04933"
/note="Protein of unknown function DUF3789, protein
motif: Pfam:PF12664.1"
/product="Protein of unknown function DUF3789"
/"ID=B40_04933
/protein_id="gnl|SC|B40_04933""
/codon_start=1
CDS    complement(32308..33429)
/color=4

```

/locus\_tag="B40\_04934"  
 /note="Putative replication initiation factor Tn916-like CTn1-Orf26, protein motif: Pfam:PF02486.13"  
 /product="Putative replication initiation factor Tn916-like CTn1-Orf26 Replication initiation factor domain-containing protein [relaxase]"  
 /"ID=B40\_04934  
 /protein\_id="gnl|SC|B40\_04934""  
 /codon\_start=1  
 CDS        complement(33709..35103)  
 /color=4  
 /locus\_tag="B40\_04935"  
 /note="DNA translocase FtsK DNA segregation ATPase FtsK/SpoIIIE and related proteins, similar to AA sequence: UniProtKB:P64165 protein motif: Cdd:COG1674 protein motif: TIGRFAMs:TIGR03924 protein motif: Pfam:PF01580.12"  
 /product="DNA translocase FtsK DNA segregation ATPase FtsK/SpoIIIE and related proteins [ATPase coupling protein]"  
 /"ID=B40\_04935  
 /gene="ftsK""  
 /protein\_id="gnl|SC|B40\_04935"  
 /codon\_start=1  
 CDS        complement(35214..35780)  
 /ID=B40\_04936  
 /color=1  
 /locus\_tag="B40\_04936"  
 /note="Hypothetical protein"  
 /product="YcxB family protein [transmembrane protein]"  
 /protein\_id="gnl|SC|B40\_04936"  
 /codon\_start=1  
 CDS        complement(35777..36319)  
 /color=1  
 /locus\_tag="B40\_04937"  
 /note="Protein of unknown function DUF3795, protein motif: Pfam:PF12675.1"  
 /product="Protein of unknown function DUF3795"  
 /"ID=B40\_04937  
 /protein\_id="gnl|SC|B40\_04937""  
 /codon\_start=1  
 CDS        complement(36380..36817)  
 /ID=B40\_04938  
 /color=1

/locus\_tag="B40\_04938"  
 /note="Hypothetical protein"  
 /product="hypothetical protein"  
 /protein\_id="gnl|SC|B40\_04938"  
 /codon\_start=1  
 CDS        complement(36882..37202)  
 /color=7  
 /locus\_tag="B40\_04939"  
 /note="Regulator of competence-specific genes TfoX  
 N-terminal domain, protein motif:Cdd:COG3070 protein  
 motif:Pfam:PF04993.7"  
 /product="Regulator of competence-specific genes TfoX  
 N-terminal domain [transcriptional regulator]"  
 /"ID=B40\_04939  
 /protein\_id="gnl|SC|B40\_04939""  
 /codon\_start=1  
 CDS        37448..37732  
 /ID=B40\_04940  
 /color=9  
 /locus\_tag="B40\_04940"  
 /note="Hypothetical protein"  
 /product="Transposase [DDE recombinase]"  
 /protein\_id="gnl|SC|B40\_04940"  
 /codon\_start=1  
 CDS        37729..38643  
 /color=9  
 /locus\_tag="B40\_04941"  
 /note="IS3 family transposase, protein  
 motif:Pfam:PF00665.20"  
 /product="IS3 family transposase [DDE recombinase]"  
 /"ID=B40\_04941  
 /protein\_id="gnl|SC|B40\_04941""  
 /codon\_start=1  
 CDS        complement(38662..39009)  
 /color=1  
 /locus\_tag="B40\_04942"  
 /note="Protein of unknown function DUF3788, protein  
 motif:Pfam:PF12663.1"  
 /product="Protein of unknown function DUF3788"  
 /"ID=B40\_04942  
 /protein\_id="gnl|SC|B40\_04942""  
 /codon\_start=1  
 CDS        complement(39073..39531)  
 /color=8

```

/locus_tag="B40_04943"
/note="Glyoxalase, protein motif:CLUSTERS:PRK04101 protein
motif:Pfam:PF12681.1"
/product="Glyoxalase [glyoxalase]"
/"ID=B40_04943
/protein_id="gnl|SC|B40_04943""
/codon_start=1
CDS    complement(39627..40013)
/color=1
/locus_tag="B40_04944"
/note="Protein of unknown function DUF961, protein
motif:Pfam:PF06125.5"
/product="Protein of unknown function DUF961"
/"ID=B40_04944
/protein_id="gnl|SC|B40_04944""
/codon_start=1
CDS    complement(40027..40350)
/color=1
/locus_tag="B40_04945"
/note="Protein of unknown function DUF961, protein
motif:Pfam:PF06125.5"
/product="Protein of unknown function DUF961"
/"ID=B40_04945
/protein_id="gnl|SC|B40_04945""
/codon_start=1
CDS    complement(40557..43607)
/color=1
/locus_tag="B40_04946"
/note="Predicted outer membrane protein LPXTG cell wall
anchor domain, protein motif:Cdd:COG4932 protein
motif:Pfam:PF05738.7"
/product="Predicted outer membrane protein LPXTG cell wall
anchor domain [membrane protein]"
/"ID=B40_04946
/protein_id="gnl|SC|B40_04946""
/codon_start=1
CDS    complement(43851..44219)
/ID=B40_04947
/color=1
/locus_tag="B40_04947"
/note="Hypothetical protein"
/product="hypothetical protein"
/protein_id="gnl|SC|B40_04947"
/codon_start=1

```

CDS complement(44462..45010)  
 /ID=B40\_04948  
 /color=1  
 /locus\_tag="B40\_04948"  
 /note="Hypothetical protein"  
 /product="hypothetical protein"  
 /protein\_id="gnl|SC|B40\_04948"  
 /codon\_start=1

CDS complement(44997..45311)  
 /ID=B40\_04949  
 /color=1  
 /locus\_tag="B40\_04949"  
 /note="Hypothetical protein"  
 /product="hypothetical protein"  
 /protein\_id="gnl|SC|B40\_04949"  
 /codon\_start=1

CDS complement(45326..49063)  
 /ID=B40\_04950  
 /color=1  
 /locus\_tag="B40\_04950"  
 /note="Hypothetical protein"  
 /product="hypothetical protein"  
 /protein\_id="gnl|SC|B40\_04950"  
 /codon\_start=1

CDS complement(49350..50210)  
 /color=9  
 /locus\_tag="B40\_04951"  
 /note="Tyrosine recombinase, similar to AA  
 sequence:UniProtKB:P0A8P8 protein motif:CLUSTERS:PRK00236  
 protein motif:Cdd:COG4974 protein motif:TIGRFAMs:TIGR02225  
 protein motif:Pfam:PF00589.16"  
 /product="Tyrosine recombinase [recombinase]"  
 /ID=B40\_04951  
 /protein\_id="gnl|SC|B40\_04951""  
 /codon\_start=1

CDS complement(50454..51641)  
 /color=8  
 /locus\_tag="B40\_04952"  
 /eC\_number=1.1.99.28  
 /note="Glucose--fructose oxidoreductase precursor, similar  
 to AA sequence:UniProtKB:Q07982 protein  
 motif:CLUSTERS:PRK11579 protein motif:Pfam:PF01408.16"  
 /product="Glucose--fructose oxidoreductase precursor  
 [oxidoreductaes]"

```

/"ID=B40_04952
/gene="gfo""
/protein_id="gnl|SC|B40_04952"
/codon_start=1
CDS    complement(51655..52845)
/color=1
/locus_tag="B40_04953"
/note="Protein of unknown function DUF2961, protein
motif: Pfam:PF11175.2"
/product="Protein of unknown function DUF2961"
/"ID=B40_04953
/protein_id="gnl|SC|B40_04953""
/codon_start=1
CDS    complement(52865..53683)
/color=8
/locus_tag="B40_04954"
/note="Inner membrane ABC transporter permease protein
ycjP glycerol-3-phosphate transporter membrane protein,
similar to AA sequence: UniProtKB:P77716 protein
motif: CLUSTERS:PRK10973 protein motif: Cdd:COG3833 protein
motif: Pfam:PF00528.16"
/product="Inner membrane ABC transporter permease protein
ycjP glycerol-3-phosphate transporter membrane protein
[transporter]"
/"ID=B40_04954
/gene="ycjP""
/protein_id="gnl|SC|B40_04954"
/codon_start=1
CDS    complement(53692..54573)
/color=8
/locus_tag="B40_04955"
/note="sn-glycerol-3-phosphate transport system permease
protein ugpA, similar to AA sequence: UniProtKB:P10905
protein motif: CLUSTERS:PRK10561 protein motif: Cdd:COG4209
protein motif: TIGRFAMs:TIGR01581 protein
motif: Pfam:PF00528.16"
/product="sn-glycerol-3-phosphate transport system
permease protein ugpA [transporter]"
/"ID=B40_04955
/gene="ugpA""
/protein_id="gnl|SC|B40_04955"
/codon_start=1
CDS    complement(54616..55935)
/color=8

```

/locus\_tag="B40\_04956"  
 /note="Maltodextrin-binding protein maltose ABC  
 transporter periplasmic protein, similar to AA  
 sequence:UniProtKB:P0AEX9 protein motif:CLUSTERS:PRK09474  
 protein motif:Cdd:COG2182 protein motif:TIGRFAMs:TIGR03850  
 protein motif:Pfam:PF01547.19"  
 /product="Maltodextrin-binding protein maltose ABC  
 transporter periplasmic protein [transporter]"  
 /"ID=B40\_04956  
 /gene="malE""  
 /protein\_id="gnl|SC|B40\_04956"  
 /codon\_start=1  
 CDS        complement(56041..57960)  
 /color=8  
 /locus\_tag="B40\_04957"  
 /note="glycoside hydrolase family 127 protein, protein  
 motif:Cdd:COG3533 protein motif:Pfam:PF07944.6"  
 /product="glycoside hydrolase family 127 protein  
 [hydrolase]"  
 /"ID=B40\_04957  
 /protein\_id="gnl|SC|B40\_04957""  
 /codon\_start=1  
 CDS        58135..58569  
 /ID=B40\_04958  
 /color=1  
 /locus\_tag="B40\_04958"  
 /note="Hypothetical protein"  
 /product="hypothetical protein"  
 /protein\_id="gnl|SC|B40\_04958"  
 /codon\_start=1  
 CDS        58950..59882  
 /color=8  
 /locus\_tag="B40\_04959"  
 /eC\_number=2.7.13.3  
 /note="Probable sensor-like histidine kinase YehU, similar  
 to AA sequence:UniProtKB:P0AD14 protein motif:Cdd:COG2972  
 protein motif:Pfam:PF06580.7"  
 /product="Probable sensor-like histidine kinase YehU  
 [kinase two-component system]"  
 /"ID=B40\_04959  
 /gene="yehU""  
 /protein\_id="gnl|SC|B40\_04959"  
 /codon\_start=1  
 CDS        59892..61421



/color=7  
/locus\_tag="B40\_04960"  
/note="Response regulator, similar to AA  
sequence:UniProtKB:P40408 protein motif:CLUSTERS:PRK10572  
protein motif:Cdd:COG3449 protein motif:TIGRFAMs:TIGR04094  
protein motif:Pfam:PF00072.18"  
/product="Response regulator [transcriptional regulator  
two-component system]"  
/"ID=B40\_04960  
/gene="yehT""  
/protein\_id="gnl|SC|B40\_04960"  
/codon\_start=1

BASE COUNT 17394 a 13503 c 10216 g 20351 t

ORIGIN

1 ccgtattttc tacgccgtcg atgtgtgtcg ttactactat cggaacacat tttatcaacc  
61 tcgttgctat catgtgaaca caattcttca gttctatgtc gtccctctgc atttttctt  
121 tgtggtttaa atttagcacc atccacgta ttcttcaagc ccgtttata aacaaatgct  
181 aattgtgcag ggtcaacatt tccatttca tcaagccac ctacaattac ttttcaaca  
241 atgctttcaa acacatagcg gtcgaattta tcaagaactt cattctgttc caaagtttc  
301 ttaaactctt tcagacgttt tttatgtct tttcattat cagaagtttc ttgtaattt  
361 tttctttctt caacaagctg ttctgtttg ctactaaat cagcatattt acttctgtag  
421 gtttccttat caataatttc ttccagacgc atatccaaa gtttactttt tttcttct  
481 aatgcgccta tctcttttc tgcttttgca agttgtttg acaccacact actactaagc  
541 gtatcgcca ttctctgcaa aaattcttc agaacatctt tattatcatc acacaataaa  
601 cgataacttt ctacaaacgc ttctcaata gctgtttctg gaatgccttt gctatgcta  
661 cagaattttt ttctttctt cgtagccgtt acgcattgcc atataacctt gctgtactgt  
721 gaactgctgt gccaattacg ccttgtaaa gtgccaccgc agaaaccaca ttccagcata  
781 caactgaaag catatttctt actatatttt tctctcttg tgctaccctc tccaatctt  
841 ccttattaa catttcttct ggcaagaatt tcttgtgctt ttcaaaaac ttcttcgcta  
901 ataatcggtt cgtgatgatt acgaatataa aatttatctt cctctccgaa attctcaat  
961 ctcgctttg aaatcggttc tactgtaaag gtttttcta gcaataaatc gcctttatat  
1021 ttctcgttct tgataatacc aatgactgtt gattgtacc atgtagaact tccgtacttt  
1081 gttttatatc ccaattttc aagctcatgt gcaataacag aaccgccagc accctcaata  
1141 taccgattaa aaatataacg tacaatttct gttcttctt cattcacggt aattgtttc  
1201 gtgtctttgt gataatcata tccaagacaa cctgaaaac caaccagctc tcccgtttc  
1261 attttcatt ttaaactttt tttacatta gcagatatat ttcaacttc ctgctgtgcc  
1321 acagaactaa gtacaactaa aagcaattcc ccatccatag ttaaagtgtt gattttctca  
1381 tcttcaaaat atactgctat attgcgttcc ttaacatac gaacatactt taaagtatct  
1441 agcgtatttc tggcaaatct ggaaatagac tttgtaataa ccatatcaat ttccccattc  
1501 atacaatcat ttatcatacg ctggaaatct tctcttttg ccacttgtgt acctgtgatt  
1561 gttctcatcag catatatgtc cgcaagtacc cattctttat tttcttaat catatctgta  
1621 taataggcta cctgcgactt ataactgttt agctggctg cactatctgt actaacctg  
1681 caatatgcac caacagcat aagttcaatc gttttccc ttgtacgagt ttgtaaatca  
1741 tttcttgctt tgattacttc tacttcttc acagaaccac tcctttata tttgcattt

1801 gtattccttt ttagtgta ttatacaata ttcaaatata caattcaagc ggttatatct  
1861 gaaacaatat tataatcttg cataagtttt gattttacta aagcatattc ttttcagaa  
1921 atcattttac gggcaagaag ttggttcaac atggcaatct gcatactata tcgtattagt  
1981 tttttctcca tataaattcc cccttgcttg taatttcaa gcagacagac ggctttggaa  
2041 agctccgta gtatctcaac tattcccatt cttgtggga gaaccgcacc ttgcggacgt  
2101 atcattattc tgtgagcata ggtcatggca aaacgacttt tccaacagtc gctctcggat  
2161 cactgtgtgg gtcgctcgt tcttttggga aaggctatgg cgtacagttc cgtggctcg  
2221 ctatctcaca aacgtgtctg tctgctttat tcagttttca aagagctgtg tcgaaaacat  
2281 attgctttca tctttaagc agtagcagag caggaaagag ggggaattgg acaaatcatg  
2341 ctctgctggc aactgctgat tattcctcta tctcaaattc acaaatcatc ttcaatagag  
2401 cttctctgat acgtcctttt aattccatat ctacgacaac acagacattt ccgtattcat  
2461 catagaacgg acgtaaaca cattttgata tgtacggttc atagaactgc aatagcttct  
2521 caatagaatt tatattgccg tccacagccg acgaaataag ataaaatgac ggggtgtgttt  
2581 tattcatttt tcgtgttctc cttaacttt tttccgattt tatcaagtga acttttcta  
2641 atacgaaatg atgttgaacg gtcaattttc atcttgtcac cgatttctgc atcgctcatg  
2701 ccaagaaaga aatacatcaa tacaatgttt ctgtcttttt ctgaaagaac ttgagagcg  
2761 tccgctaatt catcatcaag tacacggatt tcaataccac atacatcaaa aactatgtag  
2821 tcgctttcat actcgtcca gacagccagc tttcaaca cgatttctgg aagttcacag  
2881 aatgagattt ccttattcct gcgtcgcctt aattccttc gtagtttcg tacaatgttc  
2941 ttgactacac gtttagctt gcagtcgaat tgacattgta ctgtcttttg gaagtcgac  
3001 ggtttcataa cacaccccc tttccgttat gacgtgaaaa gtgtttatcc ctctttccg  
3061 accatatctg tacggcaagg tgtgattgtg tgcaggattt tagaaaaag ttaaaaatat  
3121 tttcagcaat aaaaaaaccc gcacaaaaca tagtgtttgt gcgagctaaa gctctggcat  
3181 attcagttgt aattgtacgt attgtactgc taaattgacc ttgatatttt tgtaaatttc  
3241 ttaaaatatt ccataatgca agccccctca aagcaatgcg ttaaatactt aaaatcttgg  
3301 ttttctctaa ttatacggga cacttgctgc aacaataata ttgttggtat tcaaaagtag  
3361 gtgtgatata ttttcattag gaaattatac cttttagggc ataacaata tcaataattc  
3421 tcaatacatc ttgaaatggg ttattcttag aatttatatc tatcataagc cacttttctc  
3481 cattcccctc tctagtattg tgataaattc tctgcttttt ttccattgac attggataat  
3541 tcattttcag catttctgt ttccacagga atcaccata tttccatata actaatatct  
3601 gcacttcctt tgtaaatatt ttctgcatg aacggctttg taatcaattt atgattgga  
3661 agccatgttt caaacagata cttatttctg tgatttaaag cagtggtaac aagtcttca  
3721 aaagattctg cctcaattct gcatacaaca tactcacctg ctggtaatgt gtgtgtacc  
3781 atatttttag gacatacatc tattgatgaa gccatacctc ctacaaagta aaggaacgtt  
3841 cttttatctg gacttgctga atgagataca ccaagctcaa tatcattgtt aaaaatggca  
3901 ctttcggttt gcagtttctt tgcatgaaat tcacgccata gctgacctgg aacatcaatt  
3961 cccgtacttt ctccaacagg aatttgttca gtaacattta ctgttttttc aaaacaaaa  
4021 tacatttccc ttgttcttaa tgttttctt tgaatctca aaacaatatt cctacaatc  
4081 aatggaacat tttcatcaat catgatataa cgtgaagcaa gttctggctt gtcaaatgta  
4141 ttaacatag gaacattctt tctgtattca tctggagtta tatggtaaac tctttaaat  
4201 gctctgtga aattagcatg gtctgaaaa ccatatttta aagctatgct taatattctt  
4261 tctccgaat tattcaattc tgctattacc attgctaaac gacgaagttt gatataattc  
4321 tgaactgatc tcttaactaa tcttttaaac aaacgttgg aataaaatgt agaaagacag  
4381 gcaatttccg ccagtttctc tgttctgatt ttctactta aatgttctc aatatagttt

4441 aatgacattt caatattttc atatgcgtac atatcagtac ctccttgat aattataat  
4501 caaagtatac atgaaatfff tttgtatagc ttgtcgaca atgccattat cttataagaa  
4561 atcaaaagat ataaaaaac aatfffgtct atatggtaac ttttattct tgggtacttt  
4621 ttaatgagcc atatctaata aattcatcac atatcttta atgttttcg tatcatagac  
4681 cattggaact gtattgttca ttgcttcgct aatcgtcgt tcaatatcag ctctacatc  
4741 agcatacgat aaaccgccag cttttgcacc agctttcaat gcttttaat atctcgtttt  
4801 ttaagtccta tcattagaac caactcccta aaataagtta atcttctttt tcaaaaatta  
4861 aatctatctt tcgcatacag cttttgcgt caatttctgt gggtaaaaat cctgcgtagt  
4921 gataccccgt ttttgcgtaa ctgcaataa tttctttgtg tttatcagta caaaggaata  
4981 caactcctt cgcattatag ttaatttcta catactcata tttttcatt cttcaaaact  
5041 ctttcaaat acaaatttat ctttgattt attgactttt acaaactgga atttatattt  
5101 catacagact taatcaaatg gtgttcaaaa aaagtttcaa aagtatttgt agcaccacca  
5161 tgttccacga tttttccatc tataatttta tcaatatcta ctcctgtgat ttcaaaaacc  
5221 ttattttagt gtgtatttcc gaaaaaatct ccaacatgag tcccttcat aataaattct  
5281 gaaataacat aatcatctgc ttcgtattga cgaataattt tcatagtga gtcgggatat  
5341 gttttttga cagcctcaag gtgttcctc attccatcta tgccgataaa catctcgttt  
5401 tcgccaacct tttacacgca atcctttgaa atatattgtg gaagctcatt aagcaagttt  
5461 tctgaaacaa ccacctcata aaagtatttt ataatctctt tattgttcat ggtacacctc  
5521 caaaataaat ttcgattttc ttaattctat aaactagaat ttatagaac actactttat  
5581 caacctgcct tggtttgttt ataaagtaac ccactttgg caagtaatag caaaaatgca  
5641 actactattg catatgggtc tctcacatc gccaaaaaca aaacagcaaa aacctgaat  
5701 ccaacggaca atgaattaac tacccttttg cccttttcta atttgaaata gaccattagt  
5761 atttttacaa ttccaacgat tgttaagccg ataaacaatg cccaatagat tgtaataatc  
5821 aaaacatcat tatctacata atcaagaga ttactgcat agatataatc attgaccggt  
5881 tttgatata gcggtagaaa aataagcatc aaagaaaata agtcaacaaa cccaataat  
5941 aagtcgcata tagtattgag attggatcta ttttctttt ctgcaattgt aatcaactgt  
6001 tctctgata acagatcatc aatagacact gcaaaatc tggatatttc tttcaatgaa  
6061 tctatgcttg gatatcctct tcttgattcc cttttgaaa tagcagtctt ggaaacaaac  
6121 aatgcctctg ccagttcttc ttgtgtcaat ccccggtct tcttaattc ctgaagtttt  
6181 tcatggaatt ccaaaactg cacctcctt gcttattcta ttgattcttt gtcgatagca  
6241 taactactgc ttataaata gtaacaatc ccatactta aattactcca cctacaatat  
6301 ccgtgaacca gtgtactct gaaatcaatc ttccgataac cataaatact gaaaaagcaa  
6361 ttactgtaat cgtaataatt cgttagttg taacacaggt cagtctacgc tgaatctgtt  
6421 cgattaaagt aggcatacaca cacaatatca ataaagtagt agaagatgga taagaagcct  
6481 ccatcactcc ttcaattaag attggtctgt aattaattgg gataattca aaaattgaat  
6541 atgccagat cacgatacca taatatacac caaaaatgat gatatctgaa tccaccttaa  
6601 aaagacttct tctcttaatt aactgaacca gtccaattcc tgcaaaaatc agacatacaa  
6661 caattggtac aagccccatc cagtcggtaa tcgtataaag cgtcatatga acacctgta  
6721 aacgatgaaa ccagcagttg aatggtgcaa atccaatatt ggttccattc tgccaagag  
6781 gctgcacatc acaatctga atcaagctg tccatattac aatggtgca aggagtatca  
6841 ctcaaataa taaattcttt tttccgttct ttttcattat tctacgtcct ttcaaaagtt  
6901 aatctgtctt ttcgacaatt taacgttatc aaaaaacgta aaataacaac agaattctct  
6961 tgtcacatgt atgatacgat tcgtatcatt cttcaaata cttgttttcc tgattcatca  
7021 gacctacaat ttctaattta tcaatttctg atcttctgt attcttctat tttcaaatca

7081 ttacctcaa agataaaatt attgatgtca atcggtaaac atattagaac gcaaattata  
7141 gtgtctgggt ctaaagaatt tattttttt gtagaattat agcaataaaa ttcagataat  
7201 ctccaccgcc agcttctatt gctttacggg catttattgc atattcatta ttttgcttta  
7261 tccaatccga ccaaacttcc gaattacttt ccatttcata tattgaaatt aaatctgcct  
7321 tcttacaatg actaattatg ttagaccaat atgttatatc atgtatataa tcaagttctt  
7381 ctgggtgcc tgataacaat aactcttctg gaaggtgtc atggcaatct ttcttcatgc  
7441 caggaactgt gatataaaca aaccacctt tcttaacaaa tggaagcaat ttttcatc  
7501 aatatatagg gtcacgtcca aaataattat atgaatctgt acttactaca gcatcaaaaa  
7561 actctttctc aaatttaagt tcattggcat cagctttac agatttaatt tgtgcagaag  
7621 ataatcccat tttttgaaa aattcttcat tttctttgg ctactccat aagtcaactg  
7681 caaaaacaac aaatccatat tctttgcaa gaaatacaga agttaaact tgtccactc  
7741 caaggtcaca gacatagctg ccagacggga tttatgatt ttgtaatagt tctcttgt  
7801 atttatagg atcgggtccc ataattttg tctgtaagtc ggggtgaaaa tatttttac  
7861 tgcaatata ttccattttc tcatctccat tattgtaata ttttaatagt taatattgt  
7921 gacttataac aatattcatt ttgagttct ctgctgaaat taaaaagta tgtttgcatt  
7981 caggacagaa taaaggatta tttactttt tcattttaa tatatttctt gacaaattga  
8041 ttaacatgtg tggtaattg agatttaaa tccaacaat tttcaactgc gtctgtaca  
8101 cttatcaata gaaataatgg cgcataatat tcaatagcaa gctgtttgt atcacactc  
8161 tgaagaacac ctttttaat catttcatta aatatactt ctatataact gataggacca  
8221 tttacaagac attttgata aagcatattc attttaaat ttctatattg ctctagtatt  
8281 aacattttgc gaaaattaga cgcaattca tcagtcacc aaaaatcgta ttgtgcaaaa  
8341 gtaaagtgtg ttagactttc aatagttgta tttctgtatg cattaggggt taccactatt  
8401 gtgctttctg gtacttgata ttcttagct cgcttattat caatttgata catacgttct  
8461 acgatacagt caaaaatc ttgcttatt ttataatgtt tatataatgc tcttttgc  
8521 attccaagg cttccgcaat catacaca gaaacgcct cataaccatt cactgcaaat  
8581 aagtgtagt caattttta tatatttct tttgtgcag acatttaca cctccttct  
8641 tagtaaacga acgttactt ctgtaaacca ttatagtaa cgctcgtta cttgtcaagt  
8701 agtataaaat gtagtgtcc tttggttcat aggttgatct ctcgatcgt ggtgctttat  
8761 gccttgacc atatttcta cacatttc tctatgcaa atactgtta ttgaaagaa  
8821 ttgtactcaa agctttccat aacgttagcc ccctaaagc actttctagt atctaaaaac  
8881 atcattctac aacataacag atttcaata accttaatac atctgtcgt cctcgtatc  
8941 tttggacta ttgttagaat ttctccttg gttatactt tcataatta caatttaag  
9001 taagccaacg acaatcaaaa ccacaacaat gataatccac cagtattgtt ccataaccta  
9061 tttcccctt tcccttcaa tagtcttaa tcatctccc tgcctatgc agaatagaga  
9121 agttcattcg tattaacatg tacatataa tgtttacatt gtggaaagt gtttcaatc  
9181 gtttgatgga ctcctcagc aattctatga gcgtcaaaa gagctaaatt accatcagct  
9241 aatatttcaa tatctacata cattttcgt ccaaacatgc gggttttta tcatcaata  
9301 ccatcaacc cttgctgctg aagcacaact tcctaactt ttgttcagt agcattgtca  
9361 caactatggt ctaccattt gtaatgctt tctttgaaa tgtccaaagc agcttttaag  
9421 atacaaccgc aaatcacaac gcttgaata gggtcgaaa tagcatagcc taaacgcact  
9481 cctaaaatgc caattaagga accaaccgac gagagtgcag cagagcggg atgcatgcg  
9541 tcagccataa gtgcgtcaga attgatgct tttgagcac ttctgtaaa ccagtacatc  
9601 cactctttta taacaatgga taagactgcc gccgtaagt cgattccact agagacagaa  
9661 agcgtattgt actgtcctga aaagatttc ttgatacctg aatatcctat tccagcacc

9721 gttatagcca atgcaacaga gagaataatg gaagccacac attccatacg ttcattgccc  
9781 taaggatggt ctctatcagg ctgttttct gatatttta ttccaacat cacaacgatt  
9841 gtgcttaata catcagaagc cgagtgtaca gcgccgaca gcatagcact tgactttct  
9901 atatatccag cagcaaatg aagtagcag aaactcagat tgatgattg tgtaatttg  
9961 gaaacctgaa tagccttatt catattttg tttgcagaa gtctacctt ttccataata  
10021 tgcctcctta tctgcccag tccgaaaca gacgtttgt aaggaagtag taccagacta  
10081 aagctaccac caatcctatg gagaaataaa gaaccgctt atctgcatg gctttcgcta  
10141 cccaaatga tggagggaag ccaaccgca actggtagta actatcaata aaaaagggg  
10201 ctggtattcc gagcaatgta agtgcagcta gtttgtaac tgccatgact cctattggc  
10261 tgggctctc cgggcttgt atgatttct caaatcagc ctctgttca gcaggatatt  
10321 tttcaaatgc agtaaaaaca gtattggacc caaacagcac cgcacccgaa tgaattccc  
10381 cggcaactg gtagtaact tccgattat caaacctt aatgcggcca tcaaggctaa  
10441 tttgtgtg cataattatc tttgttca tttttcaa tctctttt tgatagtaga  
10501 atatcataat aactgacag ctgtatgta gcaggggata tgaacctta caaaaaatac  
10561 ataacagacc aatcgttct tctaaatca gtttaggcag tgattcgtaa tttgtccag  
10621 gtgtttacgg gttatgcat ttaattcct aggttgact attcaatgc ctgatccata  
10681 tcaatcagc tgctgtca atatcctaa ggaatctgc tggaaatcga tttccattt  
10741 acttccaaa tcggttct caaggaagc gagagaatac ctgttctga tagaattga  
10801 tgtctcccct tttcagctc taagaattac attatatag ttttatatg aaagcattg  
10861 ttttaattt ttttcaaag agccatcatg gcttgacag agcttctt ctatgcaat  
10921 gcttttaac cgatccacac gaaattcct atattcatt cttagcctgc aaaaccgatt  
10981 aagtaccagt tctgtcata aaacccagt gatataggct ctatcattt gcttccggt  
11041 tcttccctc ctgatgcagg atattgaatt gatattacc ttttattgca gattgcagc  
11101 tgaattgct caataacgt atccgcaat gtatttct gtccagatg gctgtacag  
11161 ttaatactg tctcaactc ctgcatag tttttcac catgctcaa aatagattg  
11221 atttataca tagctgaac aaaatcctt ataatgatt catctcatg gcaatttaa  
11281 aatttccct ctgtaatca tgcaccact tccgctgct taaacattac cggcggagt  
11341 aggaagcct ctacaagaaa atatcctt cggcctcag atccaattg tattccggt  
11401 tctcaagt tccgatac tctgtaact gtccttaagc ttatataaa tgcgtgtca  
11461 atttcttgg caggaattat tttttgat tgcagctgaa taagaataga ggtactctg  
11521 ttaatcctg tcaatttta tctctctc gtgacttca taaaagtat atctatgca  
11581 tcttaagct agctgctgt agtgcttct attgcaccct ggtataaaa gccatactc  
11641 caaacctt caccaaaact cttacatct ctaatataga actctatca gcaacttt  
11701 agaaaagata taaaacatca gagtatggac agttgcggat gtactcaga aaagattaga  
11761 tgtctaaaa gctttagtt aaagctttt agacatctaa atctaggtac taaaacatt  
11821 catcagtaa aatataat tttatttct ccaatcagg ctgatccc agtaagtcaa  
11881 aaaatagct gacatactg tctccccga tctctcct gatcgaccg acgcagaag  
11941 caatgcata cactgttc gcctgccg tctccaag atcaataaag cacttactt  
12001 tgccatctt cacaagatg ttgtgtct ccaggtgcc gtgggaaaag acaagttct  
12061 ctcgggct ttcgtctt aaaaatcat acagctcgc cggatctta aatggagtgt  
12121 cttctcca gtttcgaa tccacatcg ccagatcgtt atcagtaag taatcaatt  
12181 cggctaagc gctgtctaag ctattcgtat agggacaat cgatatgct atggagtga  
12241 agagcctgat gactccga tacagctga taatctttc agggcttgt tcatctcat  
12301 actctcca gcaaggac ccatcggct cactcatgag cagattgct cagccatcat

12361 gccgttcaaa gtgcaggacc tttggaacag gcagcttcc ttccagccat agcatcatgt  
12421 ccttttccg ttccacatca taggtgggcc cttataaccg gctgtccgtc atttttaa  
12481 ataggtttc attttctcc accagcttat ataccttagc aggagacatt ccttccgat  
12541 cttttacgca gcggtatfff tcatcagtt tttcaattc cggatgatatt ctattttag  
12601 ccatttatta tttcttctt cttttctaca gtatttaaag ataccccaag aagctaatta  
12661 taacaagacg aactccaatt cactgttctt tgatttctaa aaccttaa  
12721 agcttttca aagttgtttt caaagtggc gtataacata gtatcgacgg agccgatttt  
12781 gaaaccacaa ttatgataga atttacaagc tataaggta ttgtcctggg tttcaagcat  
12841 tagtccatgc aagttttat gctttgccca ttctatagat atattgataa ggcgctgcc  
12901 tatgcttgc ccctgaaat cttacatac ggcgatatct tctatataag cgtaccggtt  
12961 ccaattttt cgcagtttaa ctttccgac gcatttatcg tcttgtagt aaagatat  
13021 tatcttata gtattgtcaa tatattcaag gcaatctgcc tctcatcct cttcatcct  
13081 ttcgtcttg tagctttta aatatggcgc tcatagagt aattctgtaa aggtccaatt  
13141 ctgttttca tacctcgga taacttacc taccactca aatggctgc tgggtttat  
13201 gatctttc aggtgccctg cttcatttc tgtaactact gttccgcct ctttctata  
13261 tcagcggcat atgtgctatc caggcagccg gtttaccag tgtattttt atacatgtcc  
13321 ctggtatatt ttgttatatt cctatcatal tccggatagg cataatgaag ctttccgcc  
13381 acctaccgg ataccgccct gaacaattga tggcatagaa ataatgctc ccatatgtt  
13441 tcataggaat ccatccgga ggtggacaaa agtttctcc acaaatctc ggatatata  
13501 cttcaataa acttatagtt ctgctaca ctaatttaa agcctgttc gatccgacc  
13561 ttcatgata tcattctcag cagctcatgg cgaacaatct gattaaatg atcaatagca  
13621 aataaaattt cttacggca caatcttta ataacataag gtgttacatt ccaaaatca  
13681 ttgcagcaat catcatalc cttgctt ggctttctta catgataatc tatatcagc  
13741 ggaactatgt ccctttaa tctacaatct ttatcaatta gaaccttat taattatcg  
13801 cccttaggt aattatctaa ctctccaag ggcaataagg taagatcaat tttattgaa  
13861 tcatcaata gcataagata ggaaaatccc ttttctcag gtgggaataa ttcatatcc  
13921 tccgctttt gcattatatt tatattcca aattgataa gccagtcac attagatata  
13981 aacggttcta tatcattac aaaatagta atacataat cctgaaattc atcttaggt  
14041 atattaat ttgcgctga ccctcaagg gtcaaatc gaatacgtc atctgttct  
14101 gctaaagaaa gtactaaatc catcattct tttctgatc tcattacat actctcgtt  
14161 tatttttct atattattac atcttcttt ttgccgatac aatcagcatc attggcgct  
14221 gcatttcatc cgcatcccc ggaatatca tcatgttctc tggcggctgt ggctccaca  
14281 tctgattat tataaaacta tttgaaagca gtgtatttag atagtggc agtgttctat  
14341 gatatttgt aacttttct tcaaaaaca tagctgtccg ttgccctca taataaat  
14401 tgtccaccgg gaaatgcagt atttctctt tttcgtata ataccagtct tgtgttccat  
14461 gagcagtaa aacaggatgt tcaactgtaa aaactaaatt gccaccagcc tcagcatcc  
14521 tatatatctt tttattaaa ttctatagat ctgctacata atgaaacgca agcgaacta  
14581 gtattacatc aaagctctc tctgggaaat cacatctc tatggcacag cattcatatt  
14641 caatctgtg aaaatgggtt tttctttg ctacttcgag cttttatga gaaatca  
14701 cacctactac agaggaagca ccgtttcca tgcataat acagtccat ccatagccg  
14761 atcctaaatc aagcacagc ttatctact tgtttttgc ctctgtacc gctaaaacc  
14821 gttagactg aacgagtaa gcccttata tctgttgtt tgaagacca atcttgccat  
14881 tcttgaaag aataacgga attgggatca aaaaattcta cattgtccgt tcttgata  
14941 cgagcaatcc caaatgatt gcacgttaga tcaactggca aagacttcc aaaaattct

15001 cggatatttt gcgagattat tttggctgct ttgacagatt taaattctga tttgaagtc  
15061 acataaactg gcgtttctaa aacaaaatat gcttgataac cttatcaga ttgataatt  
15121 aacgtaggca taaaacctaa atcaatagct gttgttaaaa tatcgcttgc tgaatagtt  
15181 tcttttccg tgtgaatc aaaatcaata aagaaggat tgatttct taaattgttt  
15241 tcagaatgct ctttctgta tgaacggttt tcgtctgcat acgtaccata acgataaacg  
15301 tttggtgcc aatgcgtaaa tttatcttga ttttctgaa tcgcttctc ggaagtcaga  
15361 acaacgccac gtccccaat catgctttt tttgagcgat acgcaaaaat agccccttg  
15421 cttttacctg ctttggtagt gattgagcga atttactat ttttaaatt gtacttaac  
15481 aagccgcat gaagcacagt ttctacaaca aaaggat tcttcagct gttctctt  
15541 cttacgaaaa ttaattagtt agaagctacg atcaaagttg aatcacaaca aaaaaggcaa  
15601 tcaactaagt ttttctaat tgattgctg gtatcttctt aaagactga aattccctca  
15661 aaaaccgat ataatgggtt tacagatatt taagtatctg attaataaag taattaata  
15721 cttaccaaaa tttcgggtct cgactctt aattgattgg tggtaataca ttaaggctc  
15781 caactattt tcttggcga aaataagttg gtcgtggctc ttttttga ttcttattc  
15841 agttcgttgt ttcgttatat ctagtatacc gcttttaaaa aaaataagca acaattcgt  
15901 taaatatatt aacgacaatc attgcttctc ttcttctatt tgcaactcta cttgttctaa  
15961 ttattagga attaagtca taactaaggt tgagtttgc aattctgcaa ttcgttcaa  
16021 tgttttaat gtcggatctg attttctga ttcaatcaat gaataattg atctactcat  
16081 ttctaattc tgggagaatt tttctttga tttgtacct ctcactttt ttaagcttc  
16141 tctaaatgct agttccaagt ttctccctc ttttatgta aatatttgc acgtttcca  
16201 ttaattata tcgttacacc ttgaaatca caagtgatta atcacaatc actgtgatt  
16261 agtgattgtt atgggtgtg cctagaacga ttctaagcac atgttaatt taaagtggg  
16321 caattatct taaaatgccc tacaatgatt caataaaagc atggctgcta gtgaaactg  
16381 cgaccatgct ttaaaaaata cttaatgggg tcccagcgc ttagctcct tggagctgt  
16441 cagtagtata cctaataatt tatctacatt cccttagta acgtgtaact ttcaaattt  
16501 acaaaagcga ctcatagaat ttttctcc cgtaaataa tagataacta ttaaaaatag  
16561 acaactctg ctcataagta acggtacta aattgtttac tttggcgtg ttcattgctt  
16621 gatgaaactg attttagta aacagttgac gatattctc attgacccat tttgaaaca  
16681 agtacgtata tagcttcaa ttttatctg gaacatctgt ggtatggcgg gtaagttta  
16741 ttaagacact gtttacttt gtttaggat gaaagcattc cgctggcagc ttaagcaatt  
16801 gctgaatcga gacttgagtg tgcaagagca acctagtgt tcggtgaata tccaaggtac  
16861 gctttagaa tccttctca acaatcagat agatgcaga cgcatggctt tcaaaaacca  
16921 ctttttaat aattgtgtg cttaatggg aaggaatatt ccaacaatt ttatactct  
16981 gttgttagg gaattgaaac tgtagaatat cttggtgaat taaagtgaca cgaatgtca  
17041 gtttaattt tctgacgat aagtgaata gatgactgtc taattcaata gacgttacct  
17101 gtttactat ttagccagt ttcgtctta aatgccctt acctgttcca atttcgtaaa  
17161 cggatcggg ttcttttaaa ttcaattgt ttattattg gttgagtact ttttactc  
17221 ttaaaaagtt ttgagaatat ttatattt tttcatgta atcactctg aagtgattac  
17281 atctataaat aaatacagaa gttaaacgat ttgtttgta ttttagttat ctgtttaaa  
17341 agtcataaga ttagtactg gtaggaatta atctaacgta tttattatc tgcgtaata  
17401 ctgttttag tctgttcaa aacagtagat gttttatcta cattacgcat ttggaatacc  
17461 aacatgacga atccctctt ctttaattca aatttttagc atctaattta acttcaattc  
17521 ctattataca aaattttaag ataatgcact atcaacacac tcttaagttt gtttcaagt  
17581 cttatttcca taactttagg gtaaccata cgcaagacca atcactctc gacaatactc

17641 atgattttaa tgataaaatc catgttaaac ccatagataa gaaatacacc tgcaataacc  
17701 gttacctgtt tgtgccaatt taaaaatgca ccactttttt atgattaaaa cggttgaaaa  
17761 ctgtaccact aataactcac aatagagaga tgcaccgtc aagttaatg tacaaaaata  
17821 cagcгааatt tttaaatcta tttcttatcg atacaaattc ctcgtaggcg ctcgggacc  
17881 cttaattaga ttctcttttt aaaaatgaat gctgaccta ataccattaa tgaacctagg  
17941 acagacaatg caatattttc tgtttctcct gtttttgga aaactttcat tttccgtct  
18001 gaacctttaa ccgttactgt tccgtctttt tgaacatctg cgccaatttc ttagcttca  
18061 actttttttg ttgttccgct tgctaattga atgattgggt tactatcttc aactgcaaca  
18121 atcacaacgc ctgtatctgt attaactggg ttttcgattg ggtttgctc tactggttta  
18181 cttggttctg ttggctctgt cggcttgctt aggacactgt cccaacagac actttttaa  
18241 gtatgctgca ctaatcctta ttttcacag catagcgcaa tgacagacag ccatgttctg  
18301 cattctctgt tcctgcaat tccaaattaa cttttcaga taacagaagg ttatcaata  
18361 gttgtttttc ttattacct acaaaatcgt gtgatcac aagactgatt tcatcaata  
18421 gtccgttttc taataattg ttggttaatc caccgccact gtctgtccgc atgtattac  
18481 acccatattg ctcatgcagg atctgaaagg cttttcata gtccacatga tcatttctg  
18541 acacaatata tgggtaatgc ctttctcca aataattcaa atattccttc ggagtggcag  
18601 ttgataccag aatgacaatt tcctcagat atccaagatt tcttaagcaa tgaagactc  
18661 tcaagatacc tctgtctga ggtatacct ctaatttatt gcttgataat tgataatca  
18721 taagtgaac aataattgcc tgtactgagc cgagaagcgc caaacatatt gtcattcaa  
18781 tggacaactt ttctaatgaa aaaagtaaca gtacaataaa agcgatgacc gccgaaata  
18841 ttgagggtac tccaacctt gtaaagagat accccgactt accaagaggg gtaatcгаа  
18901 agtaccgtga cactttatcg tcatcttct ctaatgtaat cattgcaaat gcaaagcaga  
18961 gcaatacagg agccatgata gaaagtaata aatcaaagat cggatagtat gcttgcaaag  
19021 aaaaatctgt tattctttca agaaagggaa taccgaattt aatcaaagct cccatgcaa  
19081 aaggcgtaaa acaagctgca aacatcatag ggctgctctt aatttgctta aatacctgta  
19141 tggtagtggg taatacctt tcatagctt tacacctcc aaacttctcc acatagctt  
19201 aactgtatgt cgcgcaacta tgtagaggat aatcaacgta gcaattaca gtaccatc  
19261 aaacgatagt aaaatgcttt ttccagttat gaggttcatg caagctgtga acggaaaaa  
19321 gcggaatata tctgtaact ttacaaacag accaacgata ggtggaacaa agcaacaat  
19381 ttctatcgac ataatacaaa tgagaaattg gttcaagttt gaaattttg tagccgcaat  
19441 aatgccaagc atagtaaaga ttgctgatgt caaagctgta ccaactgcga tactaagtaa  
19501 ctgattgcta ccggaaacga atcctaatat cattgcaatt accgtagata tggcaattaa  
19561 cgcaactggt tttgaaagta tgtactccga tacttttaca ggcgataccta ccatagcatt  
19621 taacaccttt tgactttttt ccaagaggac aatcgctccc ataaaaaaca atcccattgc  
19681 tgctgggtca gagtatatca tgatagaagc aatatccgtt ttccaatgct ccgtcaaagc  
19741 ggcaatccca cacacatata aaactgttaa tataaagtag ataaaataga aacctattt  
19801 ccattggaaa tgtatatcac cacaaattaa acgtccaat ctattgaag tgtctcctc  
19861 gtaatatcaa caaaaatc atttaatgta ggctcactac tatgaataga aagcaaacgg  
19921 ttttcgгаа taaactttt taacaactta tcttctgtgg ttctatcaag cagacattct  
19981 ccggttttct cgccttatc atagtaggta tagtgtattt tggcagctcc cttgacata  
20041 atcaaattat gcgggctatc caatgactg acttttccgg caacaataaa ggctacttgg  
20101 tcacatagct ctgttgcgct aaacatattg tgagtagtaa tgataatcgt tttccgct  
20161 ttcttttccg caagaataat atcttcatt aaacgattat ttgtagggct aagaccgctt  
20221 gtaggttcat caaggaataa tatatcaggg tcatggacta acgctttaat gaaattcaag



20281 cgagaacgca tacctttgga aaagtcagca actttttgt ccccatcatt ttctaagcct  
20341 accatatgca ataattcatc aatagaccga ggttgcttgt catatagaga agcaaaatag  
20401 gcgagatfff gtcgtgctgt gaatctctcg tagcaggttg aaaattcaaa gtctactcca  
20461 atatctcat aaaaccgatt tgatgctcc cttattctg tacctgcaac ttttacgctg  
20521 cctttataac ttgtattaag cccagttaaa atttttgaa tagttgattt cccagcacca  
20581 gagggctcta aaaaaccgaa aatttctct ctccaacat ggaaacttac atttcaaca  
20641 aacggttgt cagtatagct aaaatacagt tttttacat caatcattat tcttctcc  
20701 ttaacttta tgacgtttat agatatatag tcatataaac tgtaaaaaat ttgtttggcc  
20761 acttctgtt caaataacca acaaaaatta ttactctgct actacttct gaataatcc  
20821 attcactaaa agatcttga tcatattcaa ttctctgct tcttgaatt gttccaaaca  
20881 ggataaaaca gaatacaggg atttatgat aaccgtatgc ggaacaaaa atacaacccc  
20941 taaacctcc agtatctcca atatacgaat atactgtac atatgattct caaaaatc  
21001 tgacgatatt tttcttgca gatagccat taaagataaa tcaatctgtg aaagaatagg  
21061 cgaagtaatc acccccgtta aacttagcat gataacgtcc ttgctaaat ctctatggtt  
21121 cttatacttt ttcttttaa cgggtgttc tatacttgta aataactctt tttgtaagcg  
21181 aaaattgatt tccacatata gatgttcttt actgggataa aaagcataga atgaacctt  
21241 tgatatgttt acagcagctg ctaaactatc aactgttact tttttaagc cgtgtaatga  
21301 aaacagcttt tctcctcta tcaaaagttt actgtttatg atttctttt ctgttccgt  
21361 aaatcgtggc aaactcataa ccccttatg actaaaatgt tttatcgtc atgaaaagta  
21421 taacatttac tgattatata atcaatatac tatccaagat atttatgcaa ggtagcttcc  
21481 aatgcgttta ttgtagtgc cgtgtcctca ttaaaaatca tgtgacgatt aagctctaaa  
21541 gtaagtaatt ctttttcgg tacatgaatt aatcaataa cttgttgggt ataataaag  
21601 ctaaaaagcg gatgccttt ggcagtaatt aaaataacag gacattgtat agccccattc  
21661 tccaagcacg ataagtcagc attaaataag ctggcgacaa atctaaagg ataataggg  
21721 aaaagcatag ggtcatttaa gcaatctgt tttgctgtt cactataaaa tactctgtca  
21781 tagtctaaat aagcgtctcc tggaacctta tagttaggca gcaatttcc acctacacga  
21841 aagcccaact gtatcagccc cataaaacgg tgtgaccatg cgggatattt tgtaagctc  
21901 atagtttct ttaatgtagt cagcatgata ttatgtggaa aaacggctt taacctgtg  
21961 tccctaccg ccgcatgac agctaaaatc ccacttgac tggaacctat gacagctatg  
22021 tttcaccaa aatctctat tccgtaagtc gttgcgtcat atacattatg cagcaaatct  
22081 tccattgtat aatctttt gatttaggg cttttccgt gtgaaagata gtgaatgcct  
22141 attatattaa atcctcttc actcaacca catagaaaat tctcacaat gagagggtg  
22201 gacatagtac ccggcaaaaa acaatggta ggactactt tttctgata ccagatagaa  
22261 agtgttatcg gaacattatt tgaagaaata ccaacttct tatacatacc acatacctc  
22321 tatatgactg atttggttt atagctat aataacttat tgtaagcaga aagtcaaat  
22381 ccataaatat atgatttaag ataaaattgt caagaaagat ttaattgctt aaaatacaat  
22441 gaaatcgctt gttagtcag cacatttct acagaaaagg gactaaat ccgaaaatag  
22501 agcctgcaa caaaatct tacataataa tttccagtt gctatctta ttagcaca  
22561 gttcaactg tgatacctgc attgccttg tctgattgtc tatgaattc acggcaacct  
22621 tgactttcac attatccccg tcagccgtaa acacgggatt gactaattca gaatagaggt  
22681 agtccctgcc gataggtca agcacattgc cagctacata gtaggaaagt tcttttccg  
22741 ttgctgtcgg gtatagctta aagaatgtt ctaaaaatgc cgtagcgtca ttcacagat  
22801 cagcgtccac gcttgcgtc gcttctgtg ctttggtc ataacggat ttctcaaccg  
22861 ctggtgcaag tgtcgggtc tgaatgatta ccatatccc gtcagcgtcc acatggactt

22921 ttacggata ggttgcttg acattcgtt tctgttctcc ctctttatc tgctgatcta  
22981 cttcgtaggt agcgataaaa tcgtccgttc cagactgttc tatatccaa atcagcacat  
23041 ttgtaacaac ggagctggc ggtatacgg ttcttatggt atcaaggttt aagtctgca  
23101 actcctttgt cagatagttg ctgattgctt gcatccttc ttcgatagct tccttgctgt  
23161 tatcccatgt atagtaggac ttacagaaat ttttcacgaa attttcaatc ccgttggtgt  
23221 catttagtct tagctgtatt gtttctgttt catgtaccgt gtgcatatca atagcggtaa  
23281 agttcttata cacaccaa at gatacgttg caataagtac cacccataat gcaatcacag  
23341 atttcttatg tgtgctacc ttgacagtac gcacctttt ttcttttact ggtttttctt  
23401 tctttttaa catggttcc aatcctttct actgtttat tcttcagca ccaatcaagt  
23461 gctgttgcca atacgaatta ttaaggctgg tatatccgat aggatcgcct gcatgataca  
23521 tctgattatt tctacatag ataccgacat gggttacata gttcctgca ttgtaggtac  
23581 tgtggaaaaa gaccaa atc cagccttg cctgcatag tgggatatgc tgtgttgcgt  
23641 catactgcat ttgtgcggt ctcggtaaag agataccagc cttgccataa caccactggg  
23701 tcagtcgct acaatcaaaa gaagtgttg ggttactgcc cccatacag tatttcaac  
23761 cttgatactt caacgcttca ttcatatcc tttgtccag ttcgcccgat acttgattga  
23821 caacaagata ctggttcaca agctccacat aaaacatatt tccatagcca taacgccagc  
23881 cccgttctt tgccacagcg atagggctc tatagattac tttctgacc cccgacttat  
23941 ccctgcaaa gtttccgca agattgaatg tatgctttt tccatttct gccacatc  
24001 cccatagcc accgcatag ttataggact gtatcacgac atttatatca ctgatacctt  
24061 gatttttga ggaagaaagc agggacgcaa aatattaca ccctgcttg attgagctt  
24121 ctgtatctaa tgagttgggc ggtagcca gactttcaga actttgcata acgtcctgg  
24181 ctgtaccgcc actttcact tgtatgattg ccagcaacac attgacatac tcggaaatgc  
24241 cgttttctt ggcatactt tctacatag gctgatggtt caagacttcg gcagataggt  
24301 tcataccaac gtaattagag gaataaccgt tgccccgct gtcgtcctcg gcactaatca  
24361 gaacccaaa gaataatata atagaaaaga gtagagaaa cagactgcca atgatagcga  
24421 tatgtcttag tttcatttct tctttgtcc tttcttgaat aaggttcgtt tgttctttc  
24481 ggtattctgc tgtgatgct tctgaacggt tgtttcgtc acacggctcag ctttgaatt  
24541 ctgtcttatg tttcttgat tgacggtctt tgctgatgaa ccaccagaag atagcggagc  
24601 ttcttgaca acattgttt tgacttcatt attcttaacc gtagaagctg tggcagggcg  
24661 ttgactcc tgctgtttt ccacattgac cttagaagta gtcgctggc tttcatgggg  
24721 acgggtagct ccgctgtgc ctgatccgtc cgttttcta cctgcctgcc ttgcttctg  
24781 tgcctttga agctccatac gctgtcagc gatattctgt ctgttagct gttgtttct  
24841 gaaacgtcca gactggcgg tttctgttc ctgcaccaca ccacgctga agtcggacac  
24901 actggactt gccttttct tggcagaatg aaccgcataa gcggtctgtg tcggcatatc  
24961 ttgatattt tcttgacag cagttgcctt gtccttgacc ttattcttg tatcaaggac  
25021 agctcccag gctgaacctg cttctgccc catgctggag cttgtattc cacgattgt  
25081 cttgttcca ttctggcgtg tagatttga accgacaacg acaccaccag ccaccgacc  
25141 agcgacacca ccagactaa cagctcttc aagcctatgt tccatacgtc tagccctatg  
25201 tcgcatgaac agatacggc tgcggaatat tctccgtccc atgctttgac tgcgcccagc  
25261 gtttaaagag aacatactca taaatcgcc cagctcatg tagatactg caaacacac  
25321 tatctgcaag aacgccacca taaagaacgg gtagtccgtc gatatgtgt agaacatac  
25381 gaaatacta aaggctaccg ttacaatcag cgtaatacca gccctgtca taatgtatt  
25441 gaacacacgg acgattgcct gctttgcat actttcatag ctcggatca tggaaagtag  
25501 aaaactgata ggcaaaaaca ttgcgaaat gataaaaagt atctggctaa ataactcat

25561 gcccgtaagc aagaatacaa atatggttat tcctaagttg aagataagca ggaagaacac  
25621 catacctaaa cggttcacga cctgcggtat cgtcagattg ttgttgcatt tgcctcaat  
25681 ctgggtcttg acgacatttt cccttatttc gccgtcctcg tcctctgggc ttgccgatac  
25741 cagagcttcc acacggtcag aaccgatttc ctctatatcg gaattaccga attgaagcag  
25801 tagccacggc tgttgacttt gtatggaaaa taggctgtcc cttattaagt ccacgctatc  
25861 cttgcccttg ctgtcgtgtg cgggaagcat gatttttgtt cccaagtcca gtgaagcggg  
25921 gctgatgtct gatgaaaagt catttatttt ctgatgtag tcaggagcgt aggcaataaa  
25981 ggaagcagat aaaagaaaca cactacaaa gttgataacg gcgtgaagtg cttgctggt  
26041 ttccttttt atcagtcccg tataggcaac ataaataccc actactaaga taatcagaag  
26101 tagaaatccc acataaaatc cagaagtaga aaagccgttt tcggttaacc ctgcaagggt  
26161 ctgatgctt ttgccgatac tgtctgcat atcgttgata aaatccagct ttaggcttc  
26221 ctgaccaca tacccgtag cattgctta atacaagctg atagtcaga cgaaattgt  
26281 aatgcagtaa agccatatt gcacactttt tccaatccc tccagccagt tccacggaag  
26341 ccacgaccag ctattatcca catagaaatc aagctgataa ttcgacagcg gatatttga  
26401 ataaaggttt tcggtattga cagtgtcgtc cacaagtccc gttgctgta ccaccgttc  
26461 caagagtga agcaggataa gggacagtgc cagcagcaac agagccattt tgagaacgtg  
26521 aagtatcttt tttctgtga acgactttt tacccttct tcatcactc cacctcatt  
26581 ctctgatcg gcggtctggt atcaaaggcg tgcagtaatt ctcaaagac tgggtgatc  
26641 tgcaccacgc ccacagctc gtataaatct tgtaataggc attgccggtt ttcaaata  
26701 cgaagtcgct tctggttgtt ctgctcctt ttgtcaatgc tgaaaaatc aagggtctgc  
26761 ttaatctctg tgatgtcgg actacggaaa gcgaatttt aaccgatatt gttttcaga  
26821 tttcttttg acacgtccc cgaagactgt gttacaaaat atacgcctgc ctgcatggca  
26881 cgaccagcac gaaccagctt gtagagagc gtttcgctt gtgccacatt taagaacgcc  
26941 cacgcttct caaggtctac aatcttgaat atacttctgt ccgaatggat aaaatctaag  
27001 gcaaaggtag taattacaat cagcatggaa acagacaata gttcaatggt cgtgtattcc  
27061 tcaaaggtag tgtctttatc ggtagcact aagtcagcta ctgaaatgat attgagctgg  
27121 ttatctaac tgattgcatt tccaccgta ccgtctgaaa acagcagatg tgcaaatcg  
27181 tagtccgta agctgtcgt atggtcggca atgttgcgtg agataggcgt atcttcttt  
27241 ctaattctt caatcacatg gagcaatcct cgtggtcgc tttgggtaac ggcacgcacc  
27301 gcctttctaa gtacggggaa cttctgcgg tcctcgtatg agatccccgt aaggatgagc  
27361 agaatgtcga ttgccagact ttacagctt ttgacattct tcataatcac gaatgggtca  
27421 agaagtctg cgttttctt gtcgctgga aggtttacga tattgatttc atgggctgatt  
27481 tctggcaagg tttctttca gttgccagct tcttttctg ggtctaagat gaccgctga  
27541 ccgcaaaaca gcacagaata ataaacaagc agattgttac agaagattt tccaccgca  
27601 agacttcaa caaaggcaga agccagagca tttgtaaccg ttcctttac acctgactg  
27661 gcaaggagc gctgtaaata tacattgcgt cccgtatcaa cggaatagcc tatatagata  
27721 cccgtatttt ccctaactg ctgtgtcgt ccaaagccaa gtctgctaa gaagtcggat  
27781 ttacatact gcacatagc attgatgat cgcttctgg ctggtaaaaa ttcagaatga  
27841 agcccaaca tatcggcagc aggacgtacc agcttgact tcaaatcgtc gtagaagtc  
27901 ttgacttcat cacagcgtc tttcagttc tcaaggctgg gagcagatac acggataaca  
27961 taagagagct tatacact tttttggac tggctaaat ccatttcag ctctccaca  
28021 ttgtctagtg ctccactac atttgaactg gtttactgc cagactgata ggcgtgattg  
28081 tctaaatctt ttaactctt cttttattt ctactgtc ataacgctt tcggttctc  
28141 acaatttcta cattcatgct ggtatcaac ggaaggtaa actgctggtg ctgaaaatag

28201 aagatttcgc tggacggaaa atcaagctcg cgcacaatcg cattgacggt aaagcaggaa  
28261 acgtagcttt cgctgtcctc atgttccaag cgtaaagtgc gctggtttc ttccacaagg  
28321 caacgggtcg gacgtatcaa gtcataatgc tttatcagcg tttcctttt cagtttctc  
28381 tttggtagcg aatactcata atcttcatag gcgacaccgt cctgcccga gatgtgtca  
28441 atcagatagc cgaagtcgtt tttatctaag cgtcttactt tgaagcgtcg gctgatttg  
28501 ttttctaaca gcttttccat tttcatgtaa cggttgattt catcattcgg catagataca  
28561 aagtcattca tcagcgtatg gttcacttca tggataaact ccttgaatgt cagccacgcc  
28621 gattttttaa tgttcttcaa attaaattgt tcttccgta ccatgagctt gaagccaaga  
28681 aaaaagcggg agtctacttg attatccca atcatgctta ctaacgcttc ggtctgctcg  
28741 tctatcttct gataggcaac gtcttcaat cgccccatta ccagctttt tgactgttct  
28801 tgtatgcttt ggattgagct ttcctggca atctgcaagg cgtgtatctt gcctcacgg  
28861 gactgtgcca taagctgtcg gaagctgtca tgcacaatga atttctgtc agcagataga  
28921 aaactgtaat tgaaggtat cagctcatag taggcgaata cctcattgtc ctgttccag  
28981 acaaggttat tgtcgaata ttaatcggg aacatagctc acactcctta ctgccgtgat  
29041 agtttcatgt aatacctgct tatccagttt cacggctttt cctgcataag tggcttttg  
29101 tcgaagccc taggtaatca tggacttag aaaactgtaa ggcttctgc cgtcaaagg  
29161 cttttgcgac atgaacctg taagagctac gggaataccg aatatttca gaaatgcccc  
29221 ctcaatcatg gataagggcg gtaagtccc aacagaatg atgataaact cggttatcac  
29281 aaacctgta atctgtgtaa aggtaacggg aaagggcagg ttaaatcat tgattgcata  
29341 caagactttt tccacgtcc agataccgt atagcttta atcttttca tgtttcgtt  
29401 tcaactcctt tctttattcc tgccgtgtc ttcacggcat agtggtatct cttatgaga  
29461 tttcacataa tagaaaagga cagccgtttt tcagactgtc ccaatagaa aaagctgtca  
29521 gaagcaacaa tgcttgcgc tgatcttcca gcttctacc acagtattc acacataacc  
29581 tagcttgtt caataaaagt tccctcaaag gataaatccc tgccgtatgc ttcatagtcg  
29641 atatagttct gtaactgtgg ggggatttcc ctaacatct gcatttctc tatgaagtaa  
29701 taagcaactg cggatcatgt tcaaatcg gaatagcaat acacgtcgtc cttatggtcg  
29761 tacacttctt ccagactgcc gtaatgagag ataaactcgt ccagctcgtc cgtgatgtag  
29821 tcgggtaatt cttcaatcat ttcaaacatt tcatgagtt cttcaatcga gatataatc  
29881 ccaatctcaa tgggaaagt ttcgtatca tgtacggcgt attcttcgta tcgttctc  
29941 aagccgatac gctcggcaac atcttcttca tcaatcggaa aagagaacca gtcgccgacc  
30001 agataccctt cattgtatct ccaagatta gcgatataa cagcatatc ctctaccata  
30061 gcaacacccc atttctacgg cagttcatag ataccgtggt ctgtttctat aaattttca  
30121 ttatcatcaa gatactgtcc gtaggcatcg taatcaaagt aacgggtcag gcttctca  
30181 atggcagaaa aagcaggggc attgtccaac aatgccttg ccacatcagc catgtttta  
30241 caccatgaat aatgatcac gtcattggcg tgctggtgca gttcgtcaag gctggtaaag  
30301 taacacatca gttcccga gtcctctgt aatcaagtgc gcagacttc aaaggtatgg  
30361 taaaggtcat tcagctttc aatagtcgta tcttcgccga cttcatcagc aaaagacagt  
30421 tccatttctg tgatacggta atcttctcgc tcgataggaa gcctatctg tcttccagt  
30481 tcttctcgt caatgggaag tgtgaacct gcggaacgga tttcttcaga agtgtgtagt  
30541 cggcttcca tacagacacg catttctc ataggtttc acgtccttc tttcatgctt  
30601 cagctatgct agtgaaggg acaccaaga catagcctgc aaaatcttct aattgtttct  
30661 gcggataatc ggcaagggtc agttgcttca tttctgcca caccatcgt ttatgatgtg  
30721 gtaaatctga aatgtaggta caaccaatcc ttgctgcat atccgaaat atatcttca  
30781 agcaatcact ctaatctta atttgagat agaaaaagcg gttatctcc aatggagtaa

30841 ccgcttaatt atgtttattc ataatctcca aatttttcca aatcattggt ccaaagaggt  
30901 ggagcttctg gaaaaactc atcatgcgtt taaaatata tttctgaac gacatcaatc  
30961 caattatta tatttttat tgcgacaatg ccatctccat aaggaaaaat atttaaaaac  
31021 atacttgtaa tctgtgctaa agatatggct gaatgttctg cagggtgtgt aattccgtaa  
31081 tcacttctgc caacgggaat aatattttct gtcttcatat tacctaaacg tgcaaatgtt  
31141 ccctgtgggtg aagcatgaac agttttattc gctaagtcat attgttttct ccagacttg  
31201 gtattcatat cgcaatgagt ttgaatatca ttaaaactta tatactttt ttagaagaa  
31261 aacaaatcac ttgctcgtgc cattcatat ctatcgtccg ttcgctagc ttcaataat  
31321 gcttttgcaa cattttctcc attttctgtt ataaatgaag ctattatgga gagttcatac  
31381 atagaacgcc acctagcata tgcacatct gcaaatccat tttcataag ggtaataatt  
31441 tcaagaaatt cttgtaaagc tcgtccatgg atatgtagca tagccaaaaa agtgttatta  
31501 tttgaattt tttctcaat acttaaatcg ttgacatact ggacatagga ctcagcaact  
31561 tctaagtca taatatacat tgcttctgaa gcgacaaagc ctctatacca ttttgttct  
31621 tgtctgacta taaattcctc ttctcctgcc ctaaaagcca tgacctctc atacattgtt  
31681 ttttcatat attgagtagt atcatcagcc attttgaana gcatttctt aaataagtca  
31741 ctcaaataca tttttctaa ttttctatg acttcttag cttcagctc cgtttccgct  
31801 tcttcaattc tatttttac agttttcata aacgtatctt ttaggaaaat tgaagcatta  
31861 tcttttgcca tatttttaac ccaccctcc aatatcttat atgtaaatta taacattgtt  
31921 aaagctggtt agcactattt attatgctcc gataatctta ttgaacagct ctaagagtac  
31981 atctttgaca ccgctgcat tgaatacaa tccaacagca actaaggcaa ccaccaagaa  
32041 gccgataagt tttgaaaact cacgtttaa ccctaagtaa ataccaataa ccacaatcg  
32101 cataagcact aagctctggg cgttgcttaa aaacatgta tataaattt gccgaaatt  
32161 catttattt tctcgtctt ctttaattc aataatgtgt cggctagctt ctttccgac  
32221 actcataata cacatcagaa ccacgccgat acctatgcca agtgatacca gcagtaagtc  
32281 cttaatcaat tcccatatca tcatcaatca ctcttttct tgttttatca gttcatccac  
32341 cgaagccgtc tgttgcttca cgatctgctt gtgctgtcc gtcagtttg cctgctgttc  
32401 aatagtttg agatagtcgg tctgattgcc tgcgtctatc tgttcagca tttcaaagt  
32461 cggggcaacc tgccttgta gccagttcag cgttcttgc agagtataag gctctggctt  
32521 tgtcgtcagc ttcacgggag gtcgcccctc accaatgaac caagaccagc gtgcattgt  
32581 ttccagtca cttttctgt tgctacttc cttatcggca aagcggatat actggttgat  
32641 aatagaaaat gccgtcagct ctgcgtcgtg gtgggtcagc agttctctca cggcatagta  
32701 ggcaggttca ttttcagac gtatctcaa tcggttttta atggggactt cctcaatcgg  
32761 tattccaat tttgaggatt gttcataatt ctttcatag acacagaagt agacttact  
32821 ggtaaatgaa ccaatataaa gcgtgtgtcc catgccgtcc ttgtgactt cgttgctt  
32881 taccagctcc ccagaacct agttcttgaa agaacgaaat ttagaaatac attcctcgtt  
32941 cttgcatctc tctatcagtt ctggaatc cagtaagccc gttctgtcgt tgatagctag  
33001 gtcgatacgc tcatcacac cgccattaac taatgcgtcc atgaggaagt cataccagct  
33061 tcgctcctgt gccagcaggt agcttcaaa ctggcgacag ctttgcctt tcagttccag  
33121 caggacacct tttcctgt cttgtgaagt ataaacgaac acgtccccga tatagtaagt  
33181 ctggtgtac ttgtaatgcc cgaatctc gtgaagcata tagtctacat tcagcttag  
33241 aatgtcctg ataacgtgct gtatatccag tgtgggaaat cggatacga cataatcaa  
33301 gagcaggaac atgggagctt cgggattgaa ttttccaca gcttcagta gttgtgctt  
33361 catgtcctc gtcagtgcta cttgccagc ttcgatacgg cttagatgtt cacggctgat  
33421 accagcatg attgcaagcc ttgtctgca tacgccataa tcattgcgtt ttgctttcaa

33481 ggcgttgaga aatcagtat cattcagttg tcatacccc aatcgtgata tttttgtgat  
33541 tttgtgataa tttcaagcga ttatcacaaa tggctgaaaa tagagaaaac cctaataact  
33601 agcggacttt caaaggtttt tgaaccagtt tccagcgtaa ttgtgccctt ctgttagata  
33661 atgaggggct tgtatctgct ggctgggcta ccgccacacc agcaacggct agtccgtgcc  
33721 gtcgcctttc gcttcgcagc tcgccgtccc gtcctgcctt gcatatgtaa gagaacctat  
33781 gttctgcaaa aatcatatc ctttcgggac taaaggcgtg taaaattcac ttatgacgct  
33841 tgttcccaca tcgcaatagc cacgcccttt gatacgttc tggaaaaact gtttttcac  
33901 atcagaacca aacagcatac cgtaacctaa ttcgctgata cgtcccaacc ctacacggaa  
33961 attgaaatta tctctgatac cgtccgagaa atattttgcg tctggacgct ggcaggcaac  
34021 aatcagaaaa tagcctgctt gtcgtcctaa cataacgatt ttctttaact ggctaagtaa  
34081 acttacgctt tcctttgtcc ccagcattc aaaaaagcc acatattcat caagataag  
34141 aaaacagggg ggcagtccca gataggcgta gttttcgccc gtcttatagt tccgggtgtg  
34201 cttcatttct tcgcttcttt gtaccatgcc ctataaaag gcattgacgc aatcaatcat  
34261 ttcttctttg gtgtgatata catttcccat aactgtacct aagtctgcaa ggtcagcgtt  
34321 cttcgggtct aagatgtaaa gaatagcgtt cgtatgtagc agagctcaa taagcgtcag  
34381 cagaaaatac gttttaccgc caccagtcc accagcaatc agagcgtgag gaagtgcgtc  
34441 atattcccat acaagatfff tcatcagtct aagacagccg ttttctgctt tcacttcgtc  
34501 aatggtaatg cggttccta tcatatcata aagcagtga tattcgatat agccgtcatg  
34561 taaggctctg tcggtcagtt cacaatacaa gccactttcc aatttatcct ctaatcgtaa  
34621 gagctggctt tgatattcc ccagcgtaat ttcacagcgg atatgaagca atccttttc  
34681 catttgatag taaatctttg gaaaccagac gattttttcc cttgatctgc tttgcaggtc  
34741 agtaaaaaaa ccgccgtctt gtacagatc ggcttcatac cactgtttt ccagtatcat  
34801 tcttgccagc ttttgacggt gcagtagctt cttgaaactg tcatggcaga agcggtaata  
34861 caaaaaagcg accaatgcac aaacaccagt cgctatcagt atggttatga agttgtaagg  
34921 ggaaagcgtc aagccgttct ctaacaagct gatatgctcc caatcagtac gcatgagctg  
34981 tttcatattc agtagcagaa gaactaccac gaatacaaac agaagcgtcc ctatggaaaa  
35041 atggtagaca aggtgcttgt cgctggctct gatacgggtg cttttattca aatcattcg  
35101 cataaatcaa tcaactcaat cttaaatta agtatgaaaa aagcagtcaa tcttaaaaga  
35161 ctaaccgctt tgtgtgatg aatatgaagt tgttacattg tagggtatgt tcattatagc  
35221 tgctttgttg ttttaactct tgattgtgca atttctcaa atagctgtt ttcgtttagg  
35281 tcttataaaa ctcttttggg aattaacgta tataatcgtg gtgcttgaat taagtaata  
35341 aatcatggc tttccatag tgcagagtag atgtcccact tcaactctga gtcaatgctt  
35401 tgtgttttaa attaatggtt ttcttagaa aataccagcg tatattctc atgatattt  
35461 gcagtttgtt tgaattcag tataggcatt aggatataa aatagcttcc caatgcagtt  
35521 acaacaatta tcaatcaaaa tattaataa ctaaatacg taaaagagga gaacagcata  
35581 taaatgactg acagcaaaa aatacagcg actaaagcaa tatcatatt atgtatagtt  
35641 ttactagaaa ttaaatattg ctttctgct ttatatatt cactttgagt atattgaaat  
35701 ctaaactcta ctgtttcaa agttatacct ccgttcgta tataaataat cttgttaca  
35761 atttcaaat tgaaaatcac tttttttga taagttcag ttttatatt ctctttcag  
35821 caatctccg aaacacctc accacatac agcattgtgc ctaaattgg agtaaggaca  
35881 atcgtcatt ggattgatt tgtttcattg cttctgcaa ttctgaaaga tctaataat  
35941 taactgccac acaaaagaaa gtctttctac gcccgctatt atagttagaa agtaagtaag  
36001 aaagaattg tgtttttcc tgctgtcaa gattatatt ctcaatgcct atgtttttg  
36061 ctctttctaa atctgctttt cgccgtttat gcgtgatgaa agaatacaaa tcatcaatgt

36121 gttgatattt ttgcatgga tattgtctgc attcatagca atattcaatc tttcatgtt  
36181 caagactaca tttcgcaatt ctgcatgatt gattaccatt gccacaaccg ccacagtaat  
36241 ttccaaaag catagggcat aatccgcaat tcaatccgca aagagaaaat aattggtttt  
36301 tacgttcaaa tcctttcata gtaccagtct cctaacttca aatttatctt tggatttatt  
36361 gacttttaca aactggaagt tatcgctctg acatatattt ctgtatttcg ttagaagtca  
36421 attttcgtat ttgtgtattt gcatattctt tatattcttc aacagcaaaa ataggcttg  
36481 tatctttaca ggttttacct ttattctttt ttaggtataa ctgtaagtcc tcattatttg  
36541 caaaaattt gtaggaacgt ctcccattt cacttactat tcataaata ccacatgatt  
36601 ttttcatact gtaatcagca gtacgcaa atattttgc aatttctagt gacttgaag  
36661 gaaaattcca tctttgcaga ccacgcttag ggtcatgttc aatacagatg caccgtccac  
36721 aagtcccaca gatatactgt gtatgattt gtaaacattc tatcggattt aacaacggtg  
36781 taattctatt ttatcaata tagcattcaa tgcacattat ggtctcatct ccttacaat  
36841 tatattttt atcttctata gtacataaaa ctgggatttg ctacttctt tttctcgg  
36901 tttggctg ctgattcttc atacatagca tgaacaagc ctgtcaaaaa ttcttatta  
36961 tcaacttct ctaccaaca catttctttt gctccctcat agggttaact atgcagagct  
37021 gttgacatat aactaattgc tgattttact ggtttgacaa gcaatctatc atcatagata  
37081 ccgccgacaa tcttaccagc ataatagata ataaattctc ccatcatagc acgatatgta  
37141 atttcttcta atcggataa ctgccctaaa ataaactcca aatattcttt gcttgatgcc  
37201 atactccac ctcaaattcc tatttatata cttaaattgaa gtataaaatc atcatttct  
37261 gttgggctt cttttattc ccaataattt aacaaaatca ttaaataaga ttgtatctgt  
37321 tggctcaaac atcaaccatt tccgctcatg atgggtctag aatataaata gtacaagtca  
37381 aatgagaat tcctaatcta atatttcatg gtacaatgta ggtaccgcac tgaaggagga  
37441 tctcattatg gcaaagcact atgacaaca gtttaaactg gatgcagtcc agtattatca  
37501 tgatcacaga gacttaggac tgcagggctg tgcacaaat ttaggaatca gtcaacaaac  
37561 attatcacgt tggcaaaagg agctacgtga gacaggtgat attgaatgcc gtggtccgg  
37621 taattatgct tctgatgaag caaaagaaat cgcacgatta aaacgtgaac ttcgtgatgc  
37681 acaggacgt cttgatgtac taaaaaagc aatcaacatt ctgggaaaat gacggaagcc  
37741 atttatctg aagttgctga gaaggcagaa actgccata aggctggacg ccgggtttct  
37801 gtctccgaa tgttgaata tctcggcgtt tccggttctg gttaccgtgc atggctaaaa  
37861 catgttctt caaacgtga acagcgtcgt gaaacggtaa aagccaaaat caaggatatt  
37921 tatgatgaat caaacagaa ttacgggtcc ccaaagatta ccaaagaact gcgaaaatca  
37981 ggggaaataa tctctgaacg tacagttggt aaatacatga ggcaaatggg aatcaaagca  
38041 caatgggtaa aaccatggac tattaccaca aaagattctg acttcagtag cgaattgcaa  
38101 aatccttg atgaacagtt taatccgaa cgcccaaatg ctgtctggtg ttctgatatc  
38161 acatatact ggacgataga cggatttgtt tatctaacca gtattatgga tttatattc  
38221 agaaaaatca ttgcctggac actttctaaa aactggaag tatcctgcgt gattgaaca  
38281 ataaataaag cttaaagcaag acgtaaaatc gaagaacat tgattctgca ttccgatct  
38341 ggcagccagt atgtatcaa agaatacaag aggataactg ccggtatata gtgtagctat  
38401 tcgaaaaaag cttatcctg ggacaacgca tgtattgaat cattccattc attgatcaaa  
38461 cgtgaatggc tgaaccgtt caaatccgc gattatgac atgcgtaccg attgtcttc  
38521 gaatatctgg aagcattcta caatacaaaa cgtattcata gccattgtga ctatatgtct  
38581 ccaaatgatt atgaagaact gtatcgtaga atccagaaag acgaattgct gatggcaagt  
38641 taagatgagg aaaacctcat tttaactgt actaaatctt gacataggac catgataggt  
38701 tttgtttca tcataaattt ttgcaactc ttttgaataa ctatttctat ctgtatcaaa

38761 ttttaacgt tcactttcc ctaagataat cataaatcct acacagtttt cccttgcgta  
38821 caatgcacaa agcgtttttc cgccacgacg atatttatac tcataagtcc acgctttacc  
38881 acctttgttc cataaacatt ccatgtcata cttttcatca attaaggcac acagtttatt  
38941 ccatatatca tataatgatt gcccgactaa agcagtcatt tcttctgcat taggtatfff  
39001 atccagcata ctcatfctc cttataact tctaatttat ctttgtatff attgacttct  
39061 acaacaaga atttatctca cgcaggcatt tataaatttc ataggcacgt ccatgcgttc  
39121 tgcaacttgt tctggtgca ttccgctatt taagaaacgc ttgcatacta ttttcatgff  
39181 ttctccaact tgcataatat gtttatctgg gtcataaaag cggactacac gttgtcccca  
39241 tgaatgttct ataatagggt ggacatattc aatatcatat tctttcagcc tatcagcaaa  
39301 tctatcaaaa tcacttctct caaaatagac ttcaaaattg ttaccaccaa aagaaatatt  
39361 actgtaccg ataaactctt tgtatgtttc actgtctgt aaggctaagc cacctgttaa  
39421 agttttatff gtccaaaaat ccataattac acgaagtcca aaaactttff tataaaactc  
39481 aactgattta tctatatcag tcaactaccaa cataggattt ttaaatttca ttttcgttac  
39541 ctccgcaaat tcataattac ctgttttcca tatcaatatt ataacagtca cttatatctg  
39601 ctacaatgaa aatctagttt gctagtttt ttttttgatt gtcctgtag tgtatggttc  
39661 tgtggatttc ctactggctg gttgcctttg ttcttcaaaa taatatcgtc agccttgata  
39721 taccagtcca cgtcagcccc tcaaaagttg gcatttgcta ctgtatcggc tacgggattg  
39781 ataagttcca cttcggcatt atacggatag tccttgactg ccacatcagc aggaatagac  
39841 actgtatca tgcgttctg cacactgcat ttaaatcat aagttctgcg tttgatttct  
39901 tcacttgtcg ttccgtctc atttccata cgcacctcat gtctaagggc agagaacttc  
39961 aatacaccia atgtcttttc tttgtctaata acaattccat ttgctaattc cataatgaat  
40021 accccttat ttactttcca ctggcaaat atcatcagcc agtaagatat agtttgtaaa  
40081 gccacgcca cggatattgt agccctctgc ggtaatcgtt gggttaatca gtttgattff  
40141 ctgctctggc ttgaaatgtt tctcgcagc tttggcagga atggttacga taatatcatc  
40201 agctcgttgt acgtcggaaat acaagttgta gcttctggtt acgggaacat agcgaccatt  
40261 cacacgtgt tgttcaatct tgctttcgc tgcaaatcc aattgcca atgtcttttc  
40321 catgttcggc acaacatatt ttaattccat aatgttttac ctcatfctt tctttgaatt  
40381 tttgtttagt aatagagatt ttggggagct acaactccca agcccctagt ggactgtfff  
40441 ttctcatcat tccataaatg gattgatgaa aaaagaacag tttcaatgtt aggtttccag  
40501 tctgccatag gtaatggcgg agagcgtgat tttcttttc tcatacagtt accgtcctat  
40561 gattttttca tgcgacggcg tttgtagaag tatgtacctg caagaccgcc agcagaagca  
40621 agcaacatca cgataaatgc cataaggfff gtactgtcgc ccgttttggg actgtccgtt  
40681 ttagtgtgtg tatcgggtgt tgttgggtt tctggtttct ctggttcttc gggaacttct  
40741 ggtacttctt tgattgttac cgtctgcccc tgcctcaaa tatccttatg ctccgtaacc  
40801 tttttcggtt cgtctggatt gctgaaatca tacaattctt caaaggttac aagctgtfff  
40861 ccgccaagct cggaaagcgtc gaatgtaaag gtaatctgta ctgcatgff ttactgtca  
40921 gcggtaaaagg tatagtcatf ctctacacgc ttgccgtaaa tgataagttc ggcgttttcg  
40981 tccttaatca tctgccagcc tacaagctga tacgtttgtc cgacttcaaa accctcaaa  
41041 gtaaccgtat caacaatcgt tacgtctttg cctgcttca tttctttct gccgtcctca  
41101 aaagtagctg tggatgtat ctgatgata cgtcggtaa tcaataccgt ttgccgtcg  
41161 tctcaatat ctttgtgttc tgccacctg ataggctcgt cttatcggga aaggctgtac  
41221 aattcttcaa aggttacaag gttcttgcca ctagagcag aagcgtgaa tgtataggca  
41281 atttcactt ctattgtttc atcatcagca ataaaggat agtcgttctc tacacgtttg  
41341 ccgtcaatga taagttcggc gttttcgtcc ttaatcatct gccagcctff caactgatac



41401 tttgttcctt tcacaagccc gtctaattg acggtatcaa tgattgttac ctctttgcca  
41461 gcaatgattg actttttgcc gtccttgctg gtcgctgtgg tatggattga gatttctttt  
41521 tcgtattcat cagtcaatgt gcctaaatca acggttactt tgtttctgga aatcacaatc  
41581 tcaaaagggtg ggataagttc aaagcccttg ttgctgtcag aacgtaattc ttcaataatg  
41641 taagtgtcat ataataacgc tcctttgctg tcgtctgggt cagaagtcc aaaccatacg  
41701 ccgtcctcac tggcttgcc ctcgttggtg ttgttctgt gggaagccca gtcagaagaa  
41761 gtagagaact gcccgttatc gtccgttacg acaatatggc tttctcccgt cgtcttgctt  
41821 gtgatcctaa aaagaacatc agcaagacgc ttgtgcgtac ctgctccaat cttcacgccc  
41881 tctaaatcgc cagcctaat ttgattgtag acagaatggg cttcgttggg taaatccaca  
41941 atttttccat tctctgtaat ggtaaactca atcgctttg caccgtccgt caagtagccc  
42001 tctgggtgctt cgctttctc gatacgatat ttccatgtg gtaataaatc agcagaagta  
42061 gaagccacgc cctcaatgtc cgtatgaatg gtctttacga cttcattttt cttgtataat  
42121 tttccctcaa ccaatacggc actgtcattt agggaaataa ttcaaaggc agtatctttc  
42181 aaggtagctc gccttgctg tttgggtctt ttcgtttcta aatcacgttt ctggattttg  
42241 acaccgccac ggataacctt gtctgataca gaaaattgat tgcttccagt cagtatggca  
42301 aggtcgccgt cctcgctaat ctgtgttaaa tacattcctt tgatttgttc ttcactgccg  
42361 tttgctgca tatatgcacc atctaacaaa tagccgtctg gtgctttgac ttctctacg  
42421 gttaatgtac ctaatggaag tacggcgttg ccgtcctgca tatagaagct gtcgccagcg  
42481 actttgtaag cgtcggctaa acgggtaacg taatggattg taccgtcgtc gtctttttca  
42541 gcgattgtct ttgtcgtcca tgtacgagtt gggtcagcag gaagattatc tttgtttag  
42601 tagccagcgt aatacttcca tgtgaactcc gcaccctcta aggtagcgtc gccctgcgga  
42661 ttgcttttct gtgtttccat atcaattttg aaaagctcaa tcaaggatc ggttactttt  
42721 ggcgtgtcag ctactttcaa agtcgctgtt tttcctgctt caaccttag agaatacaca  
42781 gtattatcaa tctttagacc agtcggtgcg gataattcct tgatatagac tatgccagcc  
42841 ttgacttcta cggtttcggt attgccgttg ttatctgtcg taagggtggc aagctggttt  
42901 gtgcagtcct tatcagaaaa gacaccatac gtcgcaccag cgatactgta atttccgtta  
42961 ccgtctgtaa tgctgggtt ggtggaactc tttgtagtg tagcgttacc tacattaagg  
43021 ttcgccaga actgtcccaa ttctgcccc tcgccagagt agatataacc gccacattca  
43081 tagcgtcctt tatttgctt gacaaagggt ttcgtccta cgaatacttc gtcctgcgtt  
43141 gcctttggaa tttcattata ggaagctgc acgttatcac actgccagcc aagatgtacg  
43201 ctcaatctct gccagacaac caactgtctt aaaaggtagg cgtgattact gctcaaaccg  
43261 ccgtggctgt ccgtgtattg cttgacgtat tcaatggata aggcaacgtc ggctatctgg  
43321 tcagcactca tgcgtgtgct tgcgtcagct ctggcttat atccatttct aaagtccgtg  
43381 ttaatgtcaa tacaataagc gtctcacc tcaacgtca aatgtccctc gttaaagggt  
43441 gaaccgatag aaccgtcatt cactactttt tcaacgatac cgacacgctc atcagattgt  
43501 gtccagtatt gcttgcttc ggcatgaaca atggactcg gcaaggcggg aacgatagtc  
43561 gcaaaggcta agaagcccgt acataatcgc ttgaatatct tttcataat tcttaatgct  
43621 ctttctatt tgggtaaaaa aatagacgct ctttctgaa cgccctacat tgaaaaggga  
43681 tactctttta caagtacccc tcaaatttaa tatttaattt gttgtttcc cacactctat  
43741 atcaactact actgaaacat tgatatagtt ttaactctt ttatttcgga tttatcacc  
43801 ctacttgta aacacgatat gcttgaaaaa gtcctaaaa ttaaggattt ctacatagtt  
43861 tttcgttga gcaacacaca agtctctata tggtaagaca ctgcagtttt atccagccct  
43921 gccacctcat cttctgtgc gaaccatacc ccgccaagga agagggcggc gcagacgagc  
43981 accgtaata ccggcagtaa ccggcgtac catgcattgc caatgatccg tatgaagcct

44041 tcctcccctt cctcgtccgt aaccggtata tatcccgcgg cccgcttcga ccacgatagt  
44101 ttctgccggt aggggtaaag ccctgtctcc gaccggctcg tgtcaagggtg gttttccgcc  
44161 gatgcgtttc cccacgtgtg catgtcagaa aagaccctga agccccggtt gggatacatc  
44221 ttttgaatt cctcttctgt tagatagttc cagatcgc cgcccttacc tttgaatgtc  
44281 tttttcgtct ctgacagcgg ccgtacctta tacttgataa gtcattcctc ctttatcctc  
44341 ggaagtactc ccgtgacttc tgctcaaagc tacgggcagg ggtacgccgg gaaccctggt  
44401 attcaaaaag ggagccagcc tttgaaacga ctgactccat tttgtattat cagaatggtt  
44461 tctatatggc aggggcatca tccgtaaagc tgaaggttac cgttttggaa tatgtccctt  
44521 ctgctttatt tcctgccgcg gggagattca ggtaagcata gccagtgtt atattttcag  
44581 tacctccgtt cactttttc atcgttccca tggatatacg atcagacact tccgtcccc  
44641 ccgcggtggc tgcaattccc attcttactg caccgccggt cctgcttta tccattagaa  
44701 ttccgccggg agcataacc tgaacggcta ctgtgactgt cctatccccca ttgtaaggat  
44761 ttgaagtcag cttatccttt agctcaact ttaatgctgc accgttagct gatgaattat  
44821 tatagtcagt caaaacaatt ttctgggat aagccaccag ccagtctgcc gcatccggag  
44881 ccgcggaatt tgccgtatat gttacttctg tccccgccgt tgcatgttt gccgcataaa  
44941 ccggtactgc cattgtacta acaactactg ctgtcagtgc cagcatactc ataaatttag  
45001 ttttctcat aatctgattc tccttttct ttttcttat agtatataat caacatcagc  
45061 agtctgccc atgcaattac caagacttc aggcctagca ctacgcctga atcacctggt  
45121 ttgagggtg tggtgtgac accctcccct ctctcaattt caaccaccgg aggctatta  
45181 tctgcaatat agatgaattt tgtttgtcc ctgtccccgc cgcctccggt attcccgtt  
45241 gccgagacgg tgctccgct gaatagaaga agcatcaata aatgcctgc acttattatt  
45301 tttctgtca tgatcacct cccgtttatt gtacagcga gatataaac aaggtcccct  
45361 gccctgtatc cgttgatcg gtactgatct ggaagactcc tttgtatacc ccgttgcct  
45421 cctgggactt cgtgtgaac cagatcct gagactggtt tgccgtgcct aatacaccgg  
45481 ctctgcata gccctactg atggccggtg catctaacag ctgcccctga ctgtcataag  
45541 aagaaacca tagttttta ttctgtcat tagtctggat aagttcaaag ttttcagga  
45601 cgtctacatt cacctgttta ttgctccac tcacgtctt gtaagcaacc gttaccctc  
45661 cccccgatg atcctgtcc ggattgaggt tcgtccatt ttcagtacg aggatattt  
45721 tcgggatcga gatgtaggaa tcagggtga tgcctcca cactgcttc aggcgtatgc  
45781 tttattatt cgtattctga ccggatgcaa atgtataaac agctgtatc cttccttat  
45841 atgtaagtcc cgtttttct gtccatgctc ctgtatcca catttctca accgtccagt  
45901 ggtcgaacac cttcccggca ggatactgtg atttatcggg gaaattaata gcagcgtgt  
45961 ttttccagc ataagttcta tagctattct catcagttag gctggtaagt ggacttccgt  
46021 ctgcatctat atagctgaca ttaagtccc tgtcatattt cacagaagcg acttctgat  
46081 tatccgctgg tactctatcc agagaagttg tgtgtccat atttagataa tatgtataag  
46141 cgtcccctg accgtcatic gttccgcaa aattttgaa gataatatt gaaccgcta  
46201 tcatctttac atactttgta tcggaagggt cagcattgta agtaaggctt gttcagaaa  
46261 cattttgtaa atacttattt atgtgtccgg ttacatact gccaggtaaa attccacctt  
46321 gttgataaac aggcactatt tctactcga ataccggaagt atacataatt aacgaagac  
46381 gtttttttc atcgtcattc aaggggccac tatccgatgc agccagcagt gcggctgtat  
46441 cacggcggaa atagtcggaa atgtcaatcg aatcccccg cctgaaatat tccttacctg  
46501 ctatatcctt atacaatgct cttacatagt ctgccggcag caaggggtt tccactgcac  
46561 gaatctcagc cttaaagcca acgaatgtcc cattccctc acttgatca tctggggctt  
46621 gaaaactatc tgagaaaaca atctgttct gctccagaag gtcaaaattg accccgtttt

46681 ttacaatcag attatcaggc ttttccgttg taacatactg tcattattc gtaacagtcc  
46741 cgctgattcg tccgcagta atatcaaccg cacgctggct atgccgtccc gttttattag  
46801 caacaggcat aaacagtaca tattggaaag gactgattc ctccctgctt tcggcaccgg  
46861 cattaacaac tgaataattc ccaagctcaa gtaaactttt ttttctctc tcaactgaat  
46921 attgctact gatgggatct gtccccgttt catcaaagct taatatttc ggattagat  
46981 accccactt tgggtgacg gcaaactaa aaaaatgatc cgtatctgcc gcccccgggt  
47041 atcctgtgcc cgcagcataa ttctatttg cgatcgactg cttatccaga aacattttcc  
47101 cggcagaaat ccctactttt gtctgattc ctgtggtagg attacctgag ttatcctttg  
47161 tgtcccgtat catataggaa tccagcgc atgccattga acccgtggaa atattggtaa  
47221 gtttatcaaa ataatgcggc ccctgtgcac tgctgcttga ttgtgtctgt aaataaaagc  
47281 tgttctttat attgctgacc gttatgagcg ccctgaactc ataggatca cggcctccgc  
47341 cggacggcgg ggtatattga gcctcataa gcctgacttt aatctttgcc ccgttttgc  
47401 ctgtatattc tctcataatt tgcgacgcac ctgtgttctg tgtatccctc cagctagggt  
47461 cccaaagtgt aaaagtttgc ctgatcggca tgtaagtga gaaatctcc ccattgggga  
47521 aataattcag tgtcagtgtg ggggagggcc agtaaaaata aatggagat cctcccacgc  
47581 ctactctcc tgtgcggtac atataggact caaatattaa ttcaccgccg ctgctgaatg  
47641 tcccgttga aatatcttta tctctatac ttccagcatc agtaatcact ttaactttt  
47701 tcggaccctg gcgggctatt gaagcctttt cgttactatc catatagttt gtaccataat  
47761 acggatctgg atcctgatac ctaccgagg catccgtctt tctcagccag ctgttcccgc  
47821 cttaccgct gctctgctta tcacctgttc tctatacac ccataaata agttgatccc  
47881 gttctctgc tcccactacc gtcactgta cgggataatt cggatatgta aaagaatagg  
47941 taaccgtcct gttgtctta tctctctg cttaaatc cggtagccgc acattggttt  
48001 cagaatgctt aaactcaatg ccggcaggcg tgatatttc tgacggcgct gttgcataat  
48061 atcccgggtg atacgttagc ttaactttca cttctgtctt gtatcttgc cttactcc  
48121 catcactgtt ctgaataaag cctctgagat actccagttc aaagcctgca ctttctttat  
48181 cattcacgac tgtgactgaa aactcggctg tatttagatc aatataaag gaaataactg  
48241 ccccgctagg tacttcatc gcgatatcga agtactgtt cccccctgg tctaatgcat  
48301 agaagtaaac tccatcgtg aatcgtagt aatgtatagg atatgctttt gtaactccgc  
48361 cttcagacat tgaatttgt gcacgaaca acttataagg ctctccgtca aattcctggt  
48421 cttctattcc ggtgatctct cctctgcaa aattataatc tccatctct ttaaaccat  
48481 tttctgata cattgggaca gagatttag atgtattact tgctatttc atagcctta  
48541 attcaccac tgtcttga tccgagact ccggtgaacc ttccggtgtt tccaatgtg  
48601 ctccgggtgt tcagggtct tcaggattt caggtaatgc aggtattca ggtgatgcag  
48661 gtgttccagg tgatgcaggt gcttcagccg gttccgtgag cgaatctacc gccacatca  
48721 tattctctga atgctctct gttggtgtcc tgaaaaacac ttgaaatgag aacacttcat  
48781 tttgggttac atgataagaa ccattctca aatccatgct gccccatcc ggtcaagga  
48841 tatctactat ctcaactccc tcatgtatgt ttgtccatc tctataata tctgcttccg  
48901 taccctctc attcggaata atttgaaac gatatccgct cggcgcctca taagcctta  
48961 cttcagttt tccggtatca gataaacag ccgataaac cataagtaa gcaagaata  
49021 aagctggcat tctcccaa taattttaa tctttttcc cattacgaac tcccctgtt  
49081 ttacaacata atagtatta tgcgtaaaa caggctcatc ccgtaatgta tattaaagc  
49141 taaagtctt ttgattagg aaatttaacc aattatagct tcagaattt tttgattgg  
49201 atttattag attttcaga ctttttaa gattatata tgaatttt ttccaattga  
49261 tataactaa taaaaaca gtaggaatta ctatttgt taaaaagt ttattcata

49321 aacaacataa tacatattat gttgtttttt tatgtatagg aagaaacaac caggccatc  
49381 ttgaaagcc acctttaca ctctttcca gttgtcgtcg tataggctct cgtcgtttct  
49441 atacttgcgt gtccaagat atctgccagt ctgacaacat ccttttgcac acgatagtaa  
49501 gttaatgcga acagatgtct tagattatgg ggaaacacct tattctcaca gactttagct  
49561 tccttacata gtttcttcat ggcattccat atattgctcc gatccattgg ttttccattc  
49621 ctggaataa agaccggccc tctgtaata ttctcttca tgcagtaatc cttcagcatt  
49681 tttatcagct tcattgggat gaaaataact cttactttcc ctttattgtg aacaattgct  
49741 tttccgtttt tcaaactttc aacagtaata tacctgtggt ctgatacct gatcccagtc  
49801 ccgcaaatcg tctgcaaaag catatagaga cgtatattcc cacctctcaa cgctgatcg  
49861 agcagtctct tatattcatt tttggtcagt tccttatctt cttcatagaa taccgaactc  
49921 tggactctat aaagctttaa ttttagattg cttacttca taaactcaag cagcccattc  
49981 aatgcaacaa tcatactatt gatactggaa atcttatatt gatcagaaaag gctgttttta  
50041 tatctaacca gaacttcctt tgtaatctgt ttatttcctt ccggcaataa ttataaaaa  
50101 tgcgtaatat ccctcatata cttttcgatt gttgctttac tgcgttcttc atcatacaaa  
50161 tatgctttgt attcttccat aattttcaag tctaataca ttcgcttcat aaatatgcac  
50221 tcctttatcg taacagtttt gtccttca taacatgccc cagcatcaag ttgactggta  
50281 tttttttcca ttttagttt atccgagaag ctatattctg atccggacca aaagacataa  
50341 agcggccccc gaaacttca ttttatctac atttccgggg ttctgtataa gttccgtcat  
50401 attttctga tttgatcct cttactatta catctgccgc atgtttgtga catttataca  
50461 agcttttcaa attcaggaat ttgactgtc actccgcctt tcatagctga cttgtgtgcg  
50521 catattccag ttctgtcca ataagcacct gctatctgt ctggtacagc ttgtctgttt  
50581 tcgataatcg cccgaacaaa ttcatgaatc atatgcgggt gcgatccacc atgtcctccg  
50641 ccctgtttaa aagagagatg cgtattttca tcattataca ctgtttctgt cgtaaatgaa  
50701 ccaatactct ccggaagtcg tgaggcatag tccggtactt ttattctatc ttctgtaatt  
50761 tcagagctc tgctatatct ctgaggatcg ccgtaatat cgaccatttc ctgttgaatt  
50821 ccccgtctc gtttataaat aaccggatct tccgaagcaa gctgctgcca ttcaaaactc  
50881 atttggctc catatatcct gaagcattct gaataacttc gggcaactcc atataaaaa  
50941 cgttccattt caatcgcaac atcgctgttt ttattgtga ccaaagcgt ctcaaagca  
51001 aaaggcgaat tgactgccc aatcaattca tctctgatcc gcccgatcc tttcgcata  
51061 attcctttg gatagtcatt taaaagcata aaacaaggc caatagcatg cgtcggatgc  
51121 ataagcggcg gaaatcctc ccaatgac ggccatcctt ccatatcctg gtagtgggca  
51181 catgcatat attgtattt tccgaattca ctttattta taagatctt cacataaaaa  
51241 tactctctc cgaatactgt tctctcata aacataact gtttttgct ttctttctt  
51301 gccgaatga catcttctaa ttctttaga ttattcca taggtatcgt acagccaca  
51361 tgctttccg ccattaaggc acgtatagaa aaatctgcat gtgtcgccgg aggcgttgta  
51421 atatgatcg cgtctattgt ctatcttc aataattctt caaattatt ataacaatcc  
51481 cggctcgcga ttccaaattt ttatttgc aattttatca aatcgtcatt cgtatctgct  
51541 actgcaacac tatatacatc aggatgcctt aaataaattg gaataaattc catgcaaaa  
51601 cttatcccta caatccaac cttaattta tgatcagtca tacagatcct cccttaatt  
51661 aaaaagcggc atttctgag gataaatcc catatttcca ggacggggta caagctctc  
51721 gttctgtta gatacatca tcagctcagg aagatcatt accggactgt caagataaaa  
51781 atatgtacag caggaccaat catcttctct ctcaaataat agcggccggc cgtctaact  
51841 agggatatca gcaaatcta cctctctcc atctacagaa ataaccggt taccagccgc  
51901 ctgattctgt taaagcagct gggcatgatg gaaataatcg tctctgtcaa cgccggcat

51961 ctgctgaatc gtcgctctga aatctgtatt gaaataaatc gggtcaggga tatggaggcg  
52021 ataacaacac agttccatat atttttatc atacaccgga cagccacagt ataaatcata  
52081 aaaataatcc tgtccccacg ctgtcccaat gtaatcttcg acaccggtc cgcatatcgt  
52141 cggatactta tcatctccgt caatatacgc cttaaattcg cttctcccc accatgtatc  
52201 agaatataat tttgtattgc accgaactcc catatttgc cccaggaacc tccccggcc  
52261 ctaaacacac ggcaaaattt caaaatcctt ttctggcag gttaaattct gcctattaa  
52321 atatgagtgg aaataaagta taccctctcc cagcgaatcc cctaactgt aatcaatc  
52381 atagtaaaaa tgtctgacag tggcttaga ttcatttgtt atcacaattt tcattctgt  
52441 tttgaacggc atcgggatgt atgtactgaa acttctgcc tcaggattg aaaaaagtc  
52501 gtttttaaat acagctgttt ttctagtcc tacacagaaa aatcaccaa gcggaacgct  
52561 taccgccgcc ttatattca tatccaaaa catttcaagc ttcaggcccc gaagcgtctc  
52621 cggcgtctga tcgctattg taatccaaat gcgccgatg ataccgctg tattttccg  
52681 gtgtgcaagg actctgctt ctcgggtcc aagagcaaac catggcgatc ctttcttc  
52741 atttctgtt tttctccg ctcctttt tccatccgtg tttcaaac tgcccacct  
52801 tgaacaaca ccctcggga atgtaaacat ttcttcca aacataata atcctcgtt  
52861 attttagtc tttatact gtcattta ttcctcaag gtaatatct tgaaggaaga  
52921 taaaaataat aacagttgga atgaccgca caaccgatg tgccaaaata agattccatg  
52981 agattctca cgacccatc aatgttgcga tctgtatctg tctgtatat ttacttggat  
53041 cctgtgcaac tatagtcggc cacaaatagg aattccaatt tgcacaaaa aaggaaact  
53101 ccagagtaat aacattggt ttcgaagag gaacatatat tttctgaat atctgaaaa  
53161 tagtacatc atcaattct gctgaatcat acaatgcatc cggcatctc ataaaact  
53221 gccggaacag gaacacacca tatgctgag gcaccatggg aagtatcacc cccacaaag  
53281 aattgacgag cccataacc ttgattataa aaaacaatgg aatgattata accgggaacg  
53341 gaatcatcat tgtacttaag accacataa acaaggctct tttcccga aatcttagtc  
53401 ttgcaaaggc aatgcccgc attgaatgga tgatcaaagc caaacggta accattaccg  
53461 caacaaaaag tgagttccg ataccgtaa gaacatccag tgattcaaat acctcttaa  
53521 atgcatcaag cgtaatatg tgtggaatga tctataatc aaatactcc gtttctttt  
53581 tcaatgaact actgataaac agaataatc gaaataatc gaagacaaa aaagtacagg  
53641 caactaaagt tttaaaatt aatattctg tctttttgc cactgatca cctacttaa  
53701 ttttaacagt ttaactgta ttactgta atcattata atcagcga gagatactg  
53761 aatgcagat gcatagcaa acctgtactg tcaaatgca agctgataa cataatatac  
53821 tgtgacctt gttgacttc cgggtccgc tgctgcatg accctaatc gatcaaatc  
53881 ttgaaatgat gagataacag ttgtatcaa tataaatatg cttgtccctt ttattaagg  
53941 gaacgtgatt ttgaaaaatc tctgtacagc attagcggc tctattttg ccgcctata  
54001 ataactcgc ggaacgtct ttaaggccga aagaaaaata atcatattg acccaaaaac  
54061 aatccatatt cctactatag ctacacaaac caacgctgt gtttcgatc caagaaaaag  
54121 ctgctgctt attcctaatt gttccaatat tttattaatg taaccgttc tggaaatgaa  
54181 taaaaaagtc cacaatgtg ccgctacaat tgttgaaatc gtattcggaa gatagatccc  
54241 gatcctcaca gctgctgcc tctatttcc acggatcgaa tgaacaaaca cggcagctcc  
54301 aagagacagc agatatacag caattacata tattccggca ttttgctg ttataagtag  
54361 actgtcccag aatgttgaat ctcttaatac atcgatataa ttgctgattc ctgtaaatat  
54421 cttgtgccc aacgcgttc agtcaaaaag gctgatata atgcgtata atatcggcac  
54481 aaagatgaat aaagcatca atatccttc cggagcaatc ataagatag cggtcaccgt  
54541 ctctgtttt atacgttat gtttcttt catcatgatc ttactcttc gtctaaatgc

54601 tcctcttct tcccattatc cggtaaagt agatccgctt ttttctgat attgcaacat  
54661 gctttcctgt gcggcattag ctgcttcctc cgactcatg ctgtaaagt catcctggat  
54721 catagtagac acaatttctt ttgcttctcc tgaaggcg atttccggct gcccggtcgg  
54781 aagcacttca tccgagaata cggcagcatt atcgttaca taataaatat ctttaccgc  
54841 ttcaattaca gaatttctca tacagtaagt aaatttagca tccgatcaa attcggtcac  
54901 acggctcgacg ttaaccaca tccatgagat gaaatccttc gcaccggcaa tttttcctc  
54961 actgctctga ttgcttacca aacattcca tctccaact aactggctg tttctccgc  
55021 tttttgact gccgggagag gtactactcc atacttttcc ggatctgcac gaaatacga  
55081 ccaactgcc ttagctgca ttgctgttc tccattgtc aaaatcgaga tgtctgatac  
55141 ggatctgcc gccgtctcat tgcaattccc tgaattcaga aggtctttcc acaattggag  
55201 tgcatttact acctcatctg aattcagggt tgccattcca tcttccgtaa ataaacttcc  
55261 cccctgcatc cataaaaag gatagaagg aaaactgc cagtcgcctt tatcgactt  
55321 gaaagtaaaa cctgaatatt cgtccgtatt caatgctgca gccgcttctt ttaattcat  
55381 ccatgtagtt ggcggcttta cccctgctc ttctaattt tctttgtat agtatagtgc  
55441 aaccagatct ccatccaagg gaattccgta aatatgtcca tcccttgata cacggtcaaa  
55501 agcagcttct gtaaaatcat ttttatctc atcggtaaag atatcatcca gtggttcaca  
55561 aaccccgca tcaagatact gattaataat tgcaggacta cattcaaaga tatccggcgc  
55621 ttcaattgtg gcaaatgctg tgcaagctt tgcgtagtg tattctcaa acgggattgc  
55681 aagaaatgtt acatgatatt tgcctgaga attattatat tctcgatat attttccag  
55741 gaattccatt tccgttctc gactccactg attccaataa acaagttcaa tagggccatc  
55801 acctgctgcc tcttctgtg tctccgtact tctgtggtt tttccgacc ctgacgctat  
55861 tccgctcatt cccagcacta acgtcccac cagaacgaca gatattctt tcttaattt  
55921 gtaaagttt ctattgtt tcttcttta tacgtttta tgagctcata tctttatag  
55981 ccttattcta taaattctt ttgtaaata aaataactat ttttttaa agtggaattt  
56041 ttattttcc ggcattcata ctctatctc ccttttgc ctatttccc atgagaagta  
56101 tgggattgct gtcagcaata cattacttgc ctgtggcatc tgagtcatat ataagtcac  
56161 cgattcttcc agacacatcc ctgaaactt aagcaagacc agatcttca aaattcctc  
56221 ttacatacc atagtctcc cctgaacatc cttcgggaatt ctgtattat gcaagcttcc  
56281 tctttgatcc gcctgtcaa aacaatacac aataggccct ctataaatg caacacatcc  
56341 agcatcggcg cgcacctgag gattggcata aactttttt atattcagtc caaagtgaat  
56401 ttcaagtatg tctctcccc agtttcttc gagatagatg tagccttgc taatcgtaga  
56461 ttataattt atttctctc cattacaaat aacctggaat ccttccgcat attctggaat  
56521 tctgactgca agagtccact tttctctgt tttgatgct attttaaatg tcaatctcc  
56581 atccaaggc aatttactgt caactgtat tttagcttcc tccagttctg ctgtctgact  
56641 gataaaciaa tgtgaataaa taatcttct tttctcagtc caaatatatt tccgactga  
56701 cataaaaagc ctcaaaagat taggcgggca gcatgacat gcataccact tgggtcttcg  
56761 ggtcagtaca tgctcaaat caaaatgtc tccgatatt ccgaggactg tttccagcgg  
56821 gttgacataa aaaaaactt tccatcaa ctgcattcca cccattacc cgttatatag  
56881 ttcctctcc ataatactg cataagatgc atccgggtca agatccagca tctgtttcgc  
56941 gaacataacc atggcaactg atgacatgt ttctgataa gctgtatcat tgggaagatc  
57001 ataagcttga gtgaaggctt ctccacgggc tgttgaacc attccgctg tgatatac  
57061 ttttttccg acaatattgt tccacaattt ttacaggcc tcataaagcg ttacatcctc  
57121 cgtttcata gccagctctg ccatggcggg ataaagatag actgccctta cacaatgtcc  
57181 taccgctcgc tctgttccc gcacagggtt atgacattgt gcattttctc gatcataagg

57241 atccatatga aataaagtcc atcctctggt ttgttttct tcataaaaa aatcaggatc  
57301 ttgccctcgt tgttctacaa aatatgacgc taatttcttg tattttcat tcctgtaat  
57361 aaaatacaat ttcacagcc ctattccac ctctggatgc cccggaatcc ccgaaatth  
57421 atcgtccca aaccgtcgg caatgtggc tgccaatcgg attgccacat caagcagctc  
57481 tctttccca gtctctcat aatatgccg agctgctca acaaatgcc ctgcacaata  
57541 taattcatga ccttctgga gattctgcca tttatgctcc ggctcttga taataaata  
57601 tgtattcaa tagccgtct cctgctgcg cgctttata taactgatta tttatctgt  
57661 tctttctcc agttccggat cagattgac tgacaatgaa tatgcaacgc ctcaatcca  
57721 tttgaaacg tcgctatct gaaaacagt ccataaaat tcaccattag aaatacctgc  
57781 tgcaatctta aaatttcta ttgcatggct ttttctgca cctgcaact catcttaag  
57841 tatctttcc tgataggga tcgctcttt tataatcaca tttgtatat cgccccaaa  
57901 acctctggt attttata ttttaactt aactctttg gcaggataa atgcttcat  
57961 actcattatt ctctttg ggttttatt tttttatt tctataact attagaaaa  
58021 aatactaatt ttttaata gtgtatttt tttcttcat tatattatac tgtacatgat  
58081 acaatcttt taacagcca tactctttg aattaggatc ggaattgtaa ttaatgaaa  
58141 gcgaaaaaga tactactaaa aatccagta ttagaaatat ttattttgc tgctatcatt  
58201 cccatgataa ttacggcatt gtttcttat cgttcgaag taaacagaac cctgaacgt  
58261 gaaattttat cccagcggca gatattagaa ttaaccgat cgaattgct gcaaaaaatc  
58321 agccacttca acaacctac ttcacgggt tactacaatg atgctatatt aaaatgttg  
58381 gaaaatggaa aagacaggac gttgtcttct tacgagaaaa tgcagatata gccgatatt  
58441 aattccatga tgcgtacgga taacctggt ctttctttt cgcttacaac gatgtccggc  
58501 gatacattat actggaatga cggatacagc aatgtggtaa acgccacatc actcaacca  
58561 gttttctgaa gaaaattat gacagcaacg gcagcggcgt cctgtcagac ccataaac  
58621 atataaaaa acgaaaattt ccttctctg ctgcttccat ctactatgga cggtaatcc  
58681 gcagtaccga gcataattc tgtccatcg gcattttact gattgaaata gatattcat  
58741 ttttgaaga tattatctca actcaggat taaatctga agccatactg cttattacct  
58801 ccgaaaaca cacttaata tggggatacc ttgaagatct ggtaaatgt caaatcggg  
58861 aaattatacc aaaagaaacg ttatctgctc cgtcaggcga ttattctgtg agaactatca  
58921 acgaaaataa atactattgc tttactcca tgacggactc gctaaactac aattgctact  
58981 cgctgctccc cgttccatc ataaaaagt ctgcacagta tttcggatt gtcctttgc  
59041 tgatatcagt agtaatttt atctgtttg tacttatttt ttcactatgt accaaacaga  
59101 ttattacgcc aataacaat ttgtctatta ttatgataa ccagaattat atgaattact  
59161 ttccatacc agactatct attcaaatg aatagggtta ctatatgag tctttcagg  
59221 aatgagtac gcgaactctg catctgttg aacaataaa agagtcaccc aaaaaagaag  
59281 cccggcagca gctcgcctt cttcatgcac agctaaacc tcattttcta tataatact  
59341 tggactctat aaactggatg gtcagaatg aaaatgcaa aaaaattccg gaagtaataa  
59401 atgcctgtc acaaatctta agatacagca ttattaaaga caatgatttt gtatctggtt  
59461 ctgatgaact actttggta aaaaattata tatatataca gaatatcgg ttcaggatt  
59521 cgttctctat tcaatataat attgcagaaa atattatgaa ttataaaatt cccggttca  
59581 ttctccagcc atttattgag aattcctgc tgcatgggtt ttctgaaatc catcagggcg  
59641 gaatcataaa actgaatata tactctaaac aaaatgattt attttgatt atagaagata  
59701 atggaaaggg tatgaccgaa cctgcatat acacagttct ttatggtaac agcagcggaa  
59761 ttggcattgg aaatacaat gcctatatta agaagaaatt tggaagacct tatggaatac  
59821 agatcattc aaaattagca gaaggaacaa aatcataat ccgtctgcct gtacaaaagt

59881 gagggatgta tatgaatcat gtaatcatta ttgacgatga aattcaaagc cgtaccggaa  
59941 ttgccgcat ttttgaat cactctcca aatggtttat atcaggttta tttgaagacg  
60001 gcgaccaggt tcttaatac ctgaaacac atacagacat tcagctgatt gtcacagata  
60061 tccgtatgcc aaaatthaat ggccttgaac taatcagtaa aatcaggaaa accaatagta  
60121 ctatccccat tattattatc agtggatact ccgaattttc ttatgctgct aaagctgtcg  
60181 agttccatgt atttcgttat gtgctcaagc ctgttcttcc atctgaattt gataaaatca  
60241 ttacaagtgt agaaaattht ctgcagttgg aaaaggcacc ctataaatat aattttaaag  
60301 attcagaata tgaacagtht ttggatttat tattctcaga agctgcaaca caaaataaaa  
60361 aagagaccgt cacaatgctt aaacgccaat gcgggttag ttttcagaat atctggtttt  
60421 tatttctgga aggcaattca catttttcta atatctctgc cagcttctgt ccgcagthaa  
60481 aggagthttc aacagcctc tcccaggaca gtcathttt tctgttccgt cagaagcttt  
60541 attgathttt aatcaaaaa cctgathatag acacagattt tctttataag cagcttthca  
60601 aactcctthg gctthttccg cgtgaagcag gtgtacatgc aagcathat cagagcacct  
60661 ttaccgacac attcaagaat gcctthttta gcggaattc tgctthaaaa cagtacttht  
60721 atgaaaaaaa atcaatctgc ctathatgctg atcaaggtat atgtacgtht ccgcacatga  
60781 tttataaaa tctgcagctc caggtgathc aaaacaatct gttggatgthc cgggathcta  
60841 tctatgaatt tatggathat ataagagaaa aaagaccttc ctathttgaa cttcaatcat  
60901 gggatgaata gatttcactt gtgathctca aatactgcaa cgacaaaaat atgtccacag  
60961 catgctathat tgathatgthc gaaagcctgg aattcctthta taactathat agthttagaag  
61021 aaattgaaga aacathgctg tcaatgathg acagthgctt caataaagct thtgaacaaa  
61081 taaacagthc gathgcttht ctathgathc aggtgcagaa ctathgthc aatcaththaa  
61141 atgaaaaaat caccctatca gaththggcag athaththt tatcaathat acaagcctca  
61201 gtaaththt tagthccgthc accgthcagaa ctathcathgath gathththaa tthttgaaa  
61261 tctcaaaagc caaagaacta ttaaththaa ctgaththaa aaththacaca atcagthgaag  
61321 aaththgggta tagthgacaca aathaththt ttaagcathc tcggaathth gthcgaathaa  
61381 ctcaaaaga aththgaaag athaththgath taaagggath atthgathc aagghacathaa  
61441 agcghacccg gaaagctga thtt

//

DEFINITION Integrative and conjugative element ICE\_2

fasta\_record 1..18181

/ID=B79|SC|contig000001

/colour=5

CDS complement(280..1497)

/color=9

/locus\_tag="B79\_00399"

/note="Tyrosine recombinase, similar to AA

sequence:UniProtKB:P22886 protein motif:CLUSTERS:PRK00236

protein motif:Cdd:COG4974 protein motif:TIGRFAMs:TIGR02224

protein motif:Pfam:PF00589.16"

/product="Tyrosine recombinase [recombinase]"

/"ID=B79\_00399

/gene="Int-Tn""

/protein\_id="gnl|SC|B79\_00399"

/codon\_start=1



CDS complement(1579..1782)  
 /color=9  
 /locus\_tag="B79\_00400"  
 /note="Excisionase from transposon Tn916, protein motif: Pfam:PF09035.4"  
 /product="Excisionase from transposon Tn916 [excisionase]"  
 /"ID=B79\_00400  
 /gene="xis""  
 /protein\_id="gnl|SC|B79\_00400"  
 /codon\_start=1

CDS complement(2243..2473)  
 /color=7  
 /locus\_tag="B79\_00401"  
 /note="helix-turn-helix domain-containing protein , protein motif: Pfam:PF12645.1"  
 /product="helix-turn-helix domain-containing protein [transcriptional regulator]"  
 /"ID=B79\_00401  
 /protein\_id="gnl|SC|B79\_00401""  
 /codon\_start=1

CDS complement(2470..2892)  
 /color=7  
 /locus\_tag="B79\_00402"  
 /note="RNA polymerase sigma factor Sigma-70 region, protein motif: CLUSTERS:PRK12519 protein motif: TIGRFAMs:TIGR02937 protein motif: Pfam:PF08281.6"  
 /product="RNA polymerase sigma factor Sigma-70 region 4 [transcriptional regulator]"  
 /"ID=B79\_00402  
 /protein\_id="gnl|SC|B79\_00402""  
 /codon\_start=1

CDS 3397..3750  
 /color=7  
 /locus\_tag="B79\_00403"  
 /note="Anaerobic benzoate catabolism transcriptional regulator Helix-turn-helix , protein motif: CLUSTERS:PRK08154 protein motif: Pfam:PF01381.16"  
 /product="Anaerobic benzoate catabolism transcriptional regulator Helix-turn-helix [transcriptional regulator]"  
 /"ID=B79\_00403  
 /protein\_id="gnl|SC|B79\_00403""  
 /codon\_start=1

CDS complement(4096..6015)  
 /color=2

/locus\_tag="B79\_00404"  
 /note="Tetracycline resistance protein tetM from  
 transposon Tn916, similar to AA sequence:UniProtKB:P21598  
 protein motif:CLUSTERS:PRK13351 protein motif:Cdd:COG0050  
 protein motif:TIGRFAMs:TIGR00484 protein  
 motif:Pfam:PF00009.21"  
 /product="Tetracycline resistance protein tetM from  
 transposon Tn916 [antibiotic resistance]"  
 /"ID=B79\_00404  
 /gene="tetM""  
 /protein\_id="gnl|SC|B79\_00404"  
 /codon\_start=1  
 CDS        complement(6392..7306)  
 /color=4  
 /locus\_tag="B79\_00405"  
 /note="Conjugative transposon protein TcpC, protein  
 motif:Pfam:PF12642.1"  
 /product="Conjugative transposon protein TcpC [mating pair  
 formation]"  
 /"ID=B79\_00405  
 /gene="tcpC""  
 /protein\_id="gnl|SC|B79\_00405"  
 /codon\_start=1  
 CDS        complement(7321..8322)  
 /color=4  
 /locus\_tag="B79\_00406"  
 /eC\_number=3.4.-.-  
 /note="Peptidase p60 Lysozyme\_like and NLPC/P60  
 domain-containing protein, similar to AA  
 sequence:UniProtKB:P21171 protein motif:CLUSTERS:PRK13914  
 protein motif:Cdd:COG3584 protein motif:Pfam:PF00877.13"  
 /product="Peptidase p60 Lysozyme\_like and NLPC/P60  
 domain-containing protein [pepidase]"  
 /"ID=B79\_00406  
 /protein\_id="gnl|SC|B79\_00406""  
 /codon\_start=1  
 CDS        complement(8319..10430)  
 /color=4  
 /locus\_tag="B79\_00407"  
 /note="Tn916 ORF15 signal peptide containing protein , ab  
 initio prediction:Prodigal:2.60"  
 /product="Tn916 ORF15 signal peptide containing protein  
 [membrane protein]"  
 /"ID=B79\_00407

```

/protein_id="gnl|SC|B79_00407""
/codon_start=1
CDS    complement(10499..12946)
/color=4
/locus_tag="B79_00408"
/note="Type-IV secretion system protein TraC VirB4
components, protein motif:Cdd:COG3451 protein
motif:TIGRFAMs:TIGR02746 protein motif:Pfam:PF12846.1"
/product="Type-IV secretion system protein TraC VirB4
components [ATPase mating pair formation]"
/"ID=B79_00408
/gene="traC""
/protein_id="gnl|SC|B79_00408"
/codon_start=1
CDS    complement(12930..13322)
/color=4
/locus_tag="B79_00409"
/note="TcpE family [mating pair formation], protein
motif:Pfam:PF12648.1"
/product="TcpE family [mating pair formation]"
/"ID=B79_00409
/gene="tcpE""
/protein_id="gnl|SC|B79_00409"
/codon_start=1
CDS    complement(13411..13908)
/color=4
/locus_tag="B79_00410"
/note="Antirestriction protein ArdA, protein
motif:Cdd:COG4734 protein motif:Pfam:PF07275.5"
/product="Antirestriction protein ArdA [anti-ristriction
modification]"
/"ID=B79_00410
/gene="ardA""
/protein_id="gnl|SC|B79_00410"
/codon_start=1
CDS    complement(14025..14246)
/ID=B79_00411
/color=1
/locus_tag="B79_00411"
/note="hypothetical protein"
/product="hypothetical protein"
/protein_id="gnl|SC|B79_00411"
/codon_start=1
CDS    complement(14289..15494)

```

```

/color=10
/locus_tag="B79_00412"
/note="Replication initiation protein RepA, protein
motif:TIGRFAMs:TIGR03070 protein motif:Pfam:PF02486.13"
/product="Replication initiation protein RepA
[replication]"
/"ID=B79_00412
/gene="repA""
/protein_id="gnl|SC|B79_00412"
/codon_start=1
CDS    complement(15672..17057)
/color=4
/locus_tag="B79_00413"
/note="DNA translocase FtsK DNA segregation ATPase
FtsK/SpolIIE and related proteins, similar to AA
sequence:UniProtKB:P64165 protein motif:Cdd:COG1674
protein motif:TIGRFAMs:TIGR03924 protein
motif:Pfam:PF01580.12"
/product="DNA translocase FtsK DNA segregation ATPase
FtsK/SpolIIE and related proteins [ATPase coupling
protein]"
/"ID=B79_00413
/gene="ftsK""
/protein_id="gnl|SC|B79_00413"
/codon_start=1
CDS    complement(17086..17469)
/color=1
/locus_tag="B79_00414"
/note="YdcP family protein Bacterial protein of unknown
function DUF961, protein motif:Pfam:PF06125.5"
/product="YdcP family protein Bacterial protein of unknown
function DUF961"
/"ID=B79_00414
/protein_id="gnl|SC|B79_00414""
/codon_start=1
CDS    complement(17488..17802)
/color=1
/locus_tag="B79_00415"
/note="YdcP family protein Bacterial protein of unknown
function DUF961, protein motif:Pfam:PF06125.5"
/product="YdcP family protein Bacterial protein of unknown
function DUF961"
/"ID=B79_00415
/protein_id="gnl|SC|B79_00415""

```

/codon\_start=1  
CDS complement(18155..18181)  
/color=1  
/locus\_tag="B79\_00416"  
/note="Partial multidrug transporter MatE MATE efflux  
family protein, similar to AA sequence:UniProtKB:Q2G140  
protein motif:CLUSTERS:PRK09575 protein  
motif:TIGRFAMs:TIGR00797 protein motif:Pfam:PF01554.12"  
/product="Partial multidrug transporter MatE MATE efflux  
family protein [transporter]"  
/"ID=B79\_00416  
/protein\_id="gnl|SC|B79\_00416""  
/codon\_start=1

BASE COUNT 5171 a 3776 c 3249 g 5985 t

ORIGIN

1 gcgttttta atagtgaac gtatactctc ttccttctt tttctttcac tgattgaacc  
61 ttcatgatt acccagaaaa gctgattttt gataattttt catcaaaaaca aagtataaat  
121 ttctaattat cttttatat tttcttaaag gctcgtaaag ccttattcta tgtgctttcg  
181 agtattttta ctgtaggaag atacttcacg tttctttgca tatttctca tgtcttagct  
241 gtcagaagtg gtaaataagt agtaaattca tttgtactac taagcaacaa gacgctcctg  
301 ttgcttctct ttattcaagc gtttcatttc tgccattgca gaatcgaatg ttgcatgtgc  
361 gtaatagttc agcgtcatgg ctatattagc atgtcccata atgtactgta atgcctttgg  
421 attcattcct gcatttgc atgttggtaca gaatgtatgt cgcaaactat gtggagtgat  
481 gtgtggcaat ttatcctcgt tatacttatt gtatttctta acaagacctt tcatcatgcc  
541 gttgtaatca ctggcactt ttggatagtt ctttctatta agaaagagga aatcactata  
601 tccatcaatc tcaacacgct tatcattctt tcgattcgct aacactcgct taaatgcttg  
661 ataggcttct tcaacatag gaacttgacg ttcgccactt ttggctttg gtgtttcaat  
721 gtagtaccba atttcagat ctctcaatag ctgatggctt atattgacaa gacgattctc  
781 aaaatctaaa tctggaagtg tcaaaccacc aaactctgaa atacgaagac ctgtttttaa  
841 gagtatcaga atttcatcat aatttttgct gtaggtttta tcagcttttg caaaggctaa  
901 cagtttttct tctgttctt ctgttagtac ggtcttaggg acagtatcat catcaagaac  
961 tgctttcagt tgaagtcaa atggattctt ccgaacacaa tcactttgta tagcaatata  
1021 gaatgaagcc ttaaagaac gttttagatt attgatggtt tgataagcat aaccattttc  
1081 actcattcta atagcccatt ctttagcgtc tgatggctta atactgcaa tacttcttac  
1141 acctaacttg tctttctca aaatatccat aagatatttg cgtccagttt cagtgtttt  
1201 tctaactttt ggtctttgag cgttctgttt tgcgtaaagc tggcagagtg tcattttct  
1261 tctacaaca tcaataccat catgaatgtc tttctgtaac tctgagattt tctcttaag  
1321 tgagatacaa tcacgcttc ctgctggtagc tcggtctgta gccacaagtt tccacagata  
1381 acaaaattgc ggttctcaa atgaatctat atatttgat aagtatcttc cgtcttttcg  
1441 ttggctctct ccagtcttta agattcgacc tttattgtca cgtctttttt ctgacatggc  
1501 atttgcctct ttcctttatg gaaagagcct tgatagcact taatactatt ttatcatata  
1561 caagaccctt tggcagcgt agattgcgtc caatgtatct ataattttt caaattggtt  
1621 tcgtttaatc tgaatacgtat tgccattcat aatcagcaa tttgcatttt tatttctc  
1681 tgccaagcgt cgtagcttgt ttcgccaat acgaaaatat tttgacgctt cttcaatggt

1741 taggtataa cgttccaaa taggaatgtc agtctgcttc ataaaatcct ctttccaaa  
1801 tcacttatt ggatttcata aaagttgtt taccagcaat cgaacagctt tagcaaagct  
1861 cacgggagtt cccccctgc atggttctca tntagccata ctattgcct gcgacggtt  
1921 taccagctc ggactattga ctgtatggga gtatcattat cacgataaga atgtcgttg  
1981 aggcaatcct gctaaagatt gcttctcga tcaactaat gaatcgtcgc ctatctttat  
2041 aagataggtc atggcggta gttccgttg ctcttttct atcgaacgt attcgattac  
2101 ttttattcag ttttcaaaga acaatggctc gttagcctat caaacacat tgaaagctc  
2161 atatgctttg gtggaataac aaacctcct gttcgggaag cgtggaatgg ttagcacgc  
2221 ttccagaaa ggagagagga tattacttaa tttcaaatga caaatcttt gtaatcagtc  
2281 tggtttccat tcttccacgt aagacttcat caacgacat actttgattg ccatattcat  
2341 ctttcataag tcgtaggaa cgcttcgta tgtaccctct gtaatgatgt agaactggt  
2401 taatcgttc ggtatcgca tctgttcct ttacaatgag aggaaagga atcataggat  
2461 attgtgtttt catttctca attcctcat aaactttta attaaggcta gtccactggt  
2521 tctatgccga tagacagtag aacggttcaa tttcaacagg tctgcaattt ctgaatcgt  
2581 catgtccata aagtaaaaca gcagtagaat ttacgcttc ttgtctggca actcacgtaa  
2641 tgcttactc acaaatcat tttcaacgcc tactgataac ccattgagtg taaaaatctg  
2701 aaagtcagtt gaatagttat ctgttgcgc aaactggcta acaagataat cgccaacatc  
2761 cgaaaaggac acctcagct ttgcaatcct tgaaagataa agcatataat tcttcgctc  
2821 gtctccata gcacgtttac agatatagtc aaactgattt tctattgtgg tctgaaaaga  
2881 agatggttc atgttttca ccccttct gtctagaaa ggaagtgagc ctgctcgtt  
2941 tatctcttt cactctagt ccaatgtga aagggggatt tgttcatta ctgataaata  
3001 aactttgtaa aaaagttctg aatagccaaa aaagcatata aacagattta tttctctgt  
3061 tacatgcttc ttttattcta tctatagat ttataaacc acattggtgg acgtactat  
3121 ctattgcaga tagacgact ttttgaca gaaccaatg taaggaaatt tattgtatat  
3181 gatgtactc atggcgact tgacctcaa caaacgcca ttggaagta atatacaata  
3241 ttttaacagc gtaaatagca ctaccatata acggttttt ttattggcgt ttagtagtc  
3301 ttttattaa atataaacct ataaaccata taacagttt ttctatact gttttaatt  
3361 cagtagaac aataaatgt atagaggtg tctactatgc gtaaaaaaga agataaatat  
3421 gattttagag ctttggttt agccattaa gaagctgat tgaaacgagg ttaactcgt  
3481 gaacaagtgg gagcattgat tgaaattgac ccacgtact taactaatat tgaaaataa  
3541 gggcaacacc ccagcatata agttctttat gacctgtat cgttactca tgttccggt  
3601 gatgaatttt tcttactgc taataactg gtaaaaagca cccgacgatt acagatagag  
3661 aaatacatgg atagctttac agacaaagaa ctatcctaa tggaatcttt agccagcgt  
3721 atcaacgaag caagaaacat cgaagactaa ttaaaagaat ccatacataa cggaaagagc  
3781 cgataaatg agattgtatt aatctcattt tctcggctc gcgtctttgc gtctggctc  
3841 gtaatcacag ttacttgaa ctgctttatt tcaattaa tttctgtct gcattcggga  
3901 caatagaggg ggaattttt taattcagta tcttccctta tcttaacg tgttttatt  
3961 ccatacag gacacaatat ccactgtag ttataataa ctatctctc ctttactt  
4021 taattcaaat ctttattaa aatatttca tcttattaa caagaaacca tattatata  
4081 acaataaaa atacactaag ttttttatt gaacatatat cgtactttat ctatccgact  
4141 atttggacga cggggctggc aaacaggttc accggtagta acatggtacc ctttaactc  
4201 tgttaaaaa aactacgct ctttgtaaa gaaagttaa tcaactacg attcttgaat  
4261 acaccgagca gggatttct cactaagaat gacctatta ttttcaatt gagtgtctac  
4321 gatgttcgca caatattag gagcatcgtt gtatgctcgt gaaagatatt cctgtggcgc

4381 ataaatttta aaactaagat atggctctaa caattctggt ccagcttttt ttaagacttg  
4441 ttccaatata ataggagcaa gcatccgaaa atctgctggg gtactaacag ggctatagta  
4501 taagccatac ttaaaacaga ttttacaatc cgtcacattc caacatata atccttgttc  
4561 gcaaccatag cgtatccctt ccataactgc attttgaat gattgattta agtatccaag  
4621 agaaaccgag ctctcact gattccact tccaacgga agcggtgata cagataaacc  
4681 aatggaagcc cagaaaggat ttggcggcac ttcgatgtga atggtatatt ctgcattttt  
4741 taacggcttc tccatataaa tgactgtagg ctcttttagt tctatctcca catgatactt  
4801 ttcttgcaac agtgactctaa tcacttccat ttgtactttc ctaagaaag aaagtataat  
4861 ttcattgtgc gtagaatcca cgtaaatcg tagaagcgga tcactatctg agatttcaa  
4921 aagggcatca agcaacattt ctctctgttc aggtttactc ggttcaacag ttgtttgtag  
4981 tagaggggtgc ggattttcaa tctttttct ctgtggcaat agttttgat ctcaagaac  
5041 actatttaac tcaaaaact cattttgcaa aataacaatt tctccagaat aagctctatc  
5101 aatcttacat aattcacat ttattgaagt atacatttct gtaactttta tttttcttt  
5161 ttctgatact ctaaccgaat ctgtaaatg tagtactcca ctataaaggc gtatatatgc  
5221 aagacgttgt ctttttttg tatattcaat tttgaaaaca tttccgcaa gttcagacgg  
5281 acctcgatgt gttgatgaat aaaatttatt cgtaactact tctataaggt tatcaatccc  
5341 tatattgttt ttgacttcc cgtgataaac agggaacagg gaacaattat gaaatcttat  
5401 gctttctct tgttcgagtt ccaatgcttc taatgattta cggacatat atttctctaa  
5461 aaggtcatcg tttccctcta ttaccgtatc ccattgttca gattcggtaa agttcgtcac  
5521 acacatatta ggatacagtt ctacttctg ttgattaca atttcggcag aaagtttctc  
5581 ttaatatcc tgataaacg ttgataaac aattccattt tggcaatct tattgataaa  
5641 aaagatttg ggaatccca ttttctaag tgcataaat aatatacag tttgtgcttg  
5701 tacgccatct ttgagaaaa tcagtagaat tgccccatct aaaactgata atgaacgata  
5761 tacttctgct aagaaatcca tatgtctctg cgtgtctatg atgttcacct tctgttttc  
5821 cactgaaaa gaggttattc ctgtctgaat tgtaattcct ctctgacgtt ctaaaagcgt  
5881 attatccgct cctgtgtac cttgtccac gcttccaat tctgtaatcg ctccactgtt  
5941 atataataag ctttctgta aggtagtttt tctgcatca acatgagcta aaactccat  
6001 attaataatt ttatgtgat tttctccat tcaaaaacc aaaaggcat aaaaatccca  
6061 gtgataaata cttttatcac tgggatttt atgcataacc ataggatatac aaagcatata  
6121 gatattctct ggatacttta gaatcacatg ataaaggat tcttaaactg ggtgcaaaaa  
6181 actaagcct ctaaaaaag gacatctaat ttttgtcc cgctatcaa ttgacagttt  
6241 atttaagaat accttgccg atatttatta actccttta aatagtcact taaataatag  
6301 cacgtaagag catatttga aaggaatctc caattttta tcaaaaagag tacatgatta  
6361 caaagtatct gtaatcatgt accaatattt gttattttac aatcttcaa ttactcccgt  
6421 tcttttaag taccaaatca aattgagata cctgcgttgc ttgggtctgc tggctgatat  
6481 actccactgt cagcgatecc gtgacttgat tacccttac attgtgaata ggatttaca  
6541 gttcttgaaa gatgtactct tttccgattg gtttaatat cccgtcattc acatagtagg  
6601 aaagttcact ggctgtcgt gtaggataga gttgaagaa cgtcgttaa aactcattga  
6661 tttcattggt tgtaatggaa tcaaccgtcc ctcactttc aatggctttt ggtttatac  
6721 ttgatttctt aggtatgtg gtaatggtcg gattctaac cagtaccata ttccagaac  
6781 catctacata gacactact atataagcag agtggacggt cttgtattt tctcctctg  
6841 taatgagctg gtctacactg taggttacat taaactcatt gtcgccagtt ggctctaccg  
6901 tccatatctg aaatctctt acagaagacg atacaggaat atctttcgt actgatcaa  
6961 cattgagagc ttgaagtta tctgtcagat agccttttag actttccatt cgattatcaa

7021 tggacttatac ggattgctcc catgaatagt agactttcgc aaagttctct acaaaatfff  
7081 ctacatgatg agtatcaacg tattcctttt ctatgatagt tgtttcgtga atagtatgag  
7141 tatctatagc tgtaaagtgc ttgaatatcg caaagctgaa actaagccct aaaagtaccc  
7201 acaaggcaat cacaaccttt ttatgaggat tgacctata gacacgaggt ttcttttct  
7261 ttggtatctg tttttcttta ttctgatttt ttctaaatff catcattaa tcttcctttc  
7321 tcattgtttg attcgtcctg ctcccactaa atgctgtttg cagtaggggc ttgttaagtc  
7381 ggcataaccg attgggtcgc ctgcatgaaa catacggta ttgccaaggt atatcccaac  
7441 atgagtaata taagagccag cgttataggt agaatgaaag aaaaccaaaf cgccagcttg  
7501 tgcttccgat agtgggatat gctgggtcac atcatattgc tgttgtcggg ttcgtggtaa  
7561 gtaattcca gcttttccat acgtccattg tgtcagtcgg ctacaatcaa aagaagtagt  
7621 cggggaagct ccaccgtaaa cgtatcgcca gccctcatat ttcagtgctt cgtccatgat  
7681 ggcttgacc gtatcatcat caaactctgt tgtgacaaga tactgcgta cagttgcac  
7741 ataaaacata ttgcatagat tgcatacgca gccccattg ataggtatgg ctatgggatt  
7801 ggggtaagac actttttcgc cacctgaata ctcttttgag aaactttgag ccagttcaaa  
7861 ggtatatta tttccacgat tagccacata ccctaagaaa ccaccacat aattgtagga  
7921 ctggataacc gattctaaat ctacactgag cctttcgcta ctggctaata attcactgaa  
7981 atacttcaaa ccttgcttaa tggattcttc tgtactcaat gaattaggtg gaagaccgag  
8041 ggattccgag gactgcataa catcttccgc agtaccgcc gattccacct gtataatcgc  
8101 aagaagtagt ttgacatatt cttcaacgcc atattctttg gcatatffff ctaccatagg  
8161 cttatgagcc agcacttctg cggaaacatt cacacctca taatgaatat tggaaattcc  
8221 gctgtcctgt tcatctgaaa ataaaatggc acaaacaga agcagtgaga agaccatcaa  
8281 gaataatcca gaaccaccaa tcaactaaagt tttcaactc atggtttctt accgactttc  
8341 ttaatggtgg cggttttgat tgggtgtcta ctcttctgat tttgtagtgg tactctttga  
8401 acagtagacg gacgttcttt tgtgattgga cgttgtgaag ttctatctgc ttagtggtt  
8461 gaagttgctg gcttttgaac ggtttttct tgaacggtat tgccttggcg ttccactttt  
8521 ggacttgaaa aatcggaact aactgctgga cgctctgtt tggcttgtt agattcctta  
8581 tatgaagtct gaattataga ctgttttgag gtctgttcat catgatattg ttctgtctt  
8641 gtagtcggtc tttcatgaac agaagaagca ggctgtttt tctgtttgac ctgttcatt  
8701 tcagagcgac gcttcgcaat ggttttcgc cttgttctt gctgttcctt gcgtccactg  
8761 gctctgtccg ctttggtttg agaaaacta ctggtaaat cacggacatt ctctttact  
8821 ttggattttc ctgatatac tgcatactt gcattggctg gcaaatcttt aacctgttct  
8881 ttcaaaccac tagcagtgct taccattctg tctttggtat cagctactgt accgatggtt  
8941 tgaccgatac gttttccaag tgttgatttt tctttccgt ctggctggga gtgatctgct  
9001 tgtgtccttg cagaactccc cgaaccgac tgccttttt tacctgtaac aatggcagac  
9061 ccagccccta gagtagtcat ggaactgcca agtttccgct gtagacggtg catgtgagcg  
9121 tgcataagca tacgaggttt tctcatcaca cgacttcca cactttgaga atcgttact  
9181 ttagagagaaa acatactcat taaatcgccc agcttgaagt agattcctgc aaaggtcaca  
9241 atctgtagaa aagcaatcaa aaagaacgga taaccagccg ataaggtata gagcatggtt  
9301 gaaatactaa atgctgtcgt aataatcaat gtgattccag ctcgtgtcaa aatggtatta  
9361 aagagctttg ttatggctcg ttttgacata ccatcaaatg atggaatcat gcttaaaata  
9421 aagctcacag gcagaaacat agcatagatg ataaaaagta cctgcgagaa aatcatgatt  
9481 cctgttaata ggaatacaaa tatggaaatc ccaatattga agacaaatag gaagaagact  
9541 gtacctaac ggtaaatggt ctttgaatg gttagattgg tattgcttct gtcttcaatt  
9601 tcttccgcaa caatfffft tctgtctcg ccattgttg aatctgggct ggtggagagc



9661 aggctttcca cacggtcaat accgatactt tcaatgtctg aactgttgta ttgaagcagt  
9721 agccacgggt gctgaacctg tatggaaaac aggctatctc tgattaagtc cacgctgtcc  
9781 ttgccttgac tatcggaaatg gggcatgaca atcttcgtgc caagtataa actggcatta  
9841 ctgatgtctg atgaaaagtc attgattttt ttaatgtagt cgggagcgta ggcaataaag  
9901 gaagccgata ggataaacac cagcaaaaaa ttcataatgg catgaattgc ctttgtggtt  
9961 tctctcttta tcagtcccgt ataggcaaca taaacccaa gaacaaaat caagagtaag  
10021 aggaatcaa catagaaacc ctctgttgaa aatccgttg cactcacacc agctaaggtc  
10081 tgcatattct taccaatgga atctgctgta gcggaaatga agtctaagga ataggcttc  
10141 tgtactaagt aacctgtgc attggaaaca taaaactga ttgtccaaat aaaattgga  
10201 atggcatata gtccatacat gacctgtttt ccaatcccgt ccgaccagt ccacggaagc  
10261 cagccccagc tattatccac ataaaaatcc agttgatagt tttcaagtgg gtatcggctg  
10321 tattcatttg ccacattgac cgtatcatct accaagcccg cagcttgaac caccgttccc  
10381 agcatggcta aaagaaaaat ggcaatcaca agtgtgaaag cactgtcat tgccacttta  
10441 cctagacgtt tcagcgtcca gttgattttt attctgttta ctattgatgg ttccacattt  
10501 acacctctt tcgcacaggt ggtctggtat caaaggcatg gagcagttct tcaatacag  
10561 ggtggaactg tatcacacc acacgacct ataaatcact gataaggcat tgcccgtttt  
10621 ccaaatcacg caatcgcttc tgattgtttt cgtcctctgg gtctacacca aaaaggcta  
10681 aggtctttt aatctgta aggtcagtg aacgaaatgc aaatttaag ccgaggttat  
10741 tttcagttt ttcatctaag aggtcgtctg tattttgggt cacgaaatat accccagcgt  
10801 tcatagcacg accagcccga accagcttca tagatagtgt tttccttgt gctacctgta  
10861 aaaagctcca tgcttctgt aatctacaa tcttgaaaat gcttcggtct gtatggataa  
10921 agtctaaagc aaaggtacta atgacaatca gcatagcaac ggataaaagc tcatagtgg  
10981 tatattctc aaaggaagtt tcctgtcgg gaagtacaa gtccgaacc tgtataatg  
11041 tcagttgtt ttctaagctg atagactgct ccacataacc attactgaat aataaatgtg  
11101 caaagtcata gtctgtaaaa ctttcgatat ggtcggctat actggtactt agtggcgtat  
11161 tctcaaccg taattctca atcacttca tcaaccctc tacttacta ttggttactg  
11221 cacgaatggc tttctaagg attgggaagc gttccccatc acgagaggaa atccccgtaa  
11281 ggaatgtcag aatatcaata gccagtgatt cagaatctt gggattttc ataatacat  
11341 aagggtcaag taagccttg ttttctcat cagaagtcag agtgacgata ttgattcat  
11401 gggaaatctc tggcaagggt tcttccatc tgccacgttc tgcttttggg tctacaatca  
11461 ctgctgtgc ccataaagc accgcataat agacgataag gttattcga aaggattac  
11521 caccaccag cgaaccaaca aaagccgacg ctaacgcatt ggttactgaa cccttaacc  
11581 cttgactggc aagagcaggt tcagataga cattgctcc agtatctaag ctgtagccaa  
11641 cataaatccc ctattttcc cccagcattt gagtagcacc aaaacctaaa ccagcgagga  
11701 aatcagaggt cacgtattga atataatcat tcatataacg cttgctggca ggtaaaaatt  
11761 cttcatgtaa gccgagcata tccc aaatg gtcgtaccag ttttacgctt aaatcgtcat  
11821 aaaaatctt cacttacta caacgacgtt tgagttcgtc aagatcattt gctgatacc  
11881 ttaccacata agacagcttg tacatagatt ccttgcttg gtctaaattg gttccagct  
11941 cattcacact ttccagagct tccgccatc tggagctgg ttattatca ctttgccaag  
12001 cgtggtatc caagtcttc agttcttct tttattgcg gacagtagat agggctttac  
12061 gattcgtac aatttcaca ttcatgacg tatcaatcgg gaatgaaat tgctgtgct  
12121 ggtagtagaa gattcagag gacgggaagt ccagttctcc gacaatgctg ttaatgtaa  
12181 agtaagctac atagacggtt tcatcttct cctggatttt caaatatcg tgttttctt  
12241 ccaccaaca gcgagtaggc ttaatcaagt catagtattt aatcagcgtt tcattatcca

12301 gcttttctt tgatagatgg tactcatact cttcataggc agtgcctgtc tgtccgtaaa  
12361 ggtgttcaat cagatagccg aagtcgtcct tatctaacct gcggatttg aaacgacgag  
12421 agattttatt ttctaagagc ttttccatct tctgaaaacg caggatttca tcattactca  
12481 tactaacaana atcgcccatc agcttatggt tcacatcata gacaaaatca gacaaagcat  
12541 tttttgcttc aacggtaaga cttttcatag aaaactcctg atcgttgaga agcaacttaa  
12601 agccgataaa gaaacggtag ttacttggat tttcgccaat catggatatt aaagcgtctg  
12661 tctgttggtc gattttgtca taggcaaccg ctttgagctt gccagtgact tcatttttg  
12721 aacgctcttg tgcagaacgt atgtctgatt ctgtactgat ttgtaaagca tgaatttgc  
12781 catcacgatt ttgtgcgata agctgtctga aagaatcatg cacttgtatt ttctgttctg  
12841 gacttagaaa tgagtaattg taaggaacaa gctcatagta agcataacat tccccgtctt  
12901 tattccagac gagattgttt tcaatgtatt taattggata tgccataaaa ttactccta  
12961 actgctgtaa tggcttcttg tggctggttt ctgccaagcg ttacttttt tctgcatag  
13021 gtcagctttg gtcgcagtgc ataagcaatg acagacttca aaaatccata aggcttttta  
13081 ccatcaaaag tttttgtaga cataaacat gtgaaagcca caggaatccc aaagtatttg  
13141 agaaatgctc cctctatcat ggaaagaggg ggcaagttgc caagtatcat cactgcaaag  
13201 agtgacacga caaacatgt catttgcgta aaggttatgg gaaacggaag tctaaaatca  
13261 ttgatagaat acagtacctt tccacagac cagatactgg tatagcttcg tattttctt  
13321 atgtaataca tcctttcata aaaaataggg gtagctgatt gagccacccc gtaaaataga  
13381 aaatctgcca gtagtaatgt accgacagat ttaatagacg atttcaaaaa tccatgatt  
13441 ggttgagata aacgttctg aaaggtctaa atccccacca taggcttgat aatcaatata  
13501 gttttgaaga ctactggta cttgcctaa agcaccggtt tcttcaatgt agtagcgtgc  
13561 cacgtcatc atatcatc acatcgaatg aatgataata tcctcttgat gttcgcttag  
13621 ttcttcaatg cttgaaaaat gtagtagcag agcagatagc tccgattgta attcttcggg  
13681 taattccgat accatttccc atagtctgatt gagttcgcca atggaagtgt attctcaac  
13741 cgtaaagggt aactcgtagt catgaatggc gtattcctca tattcatcat tcaagccgat  
13801 ttctctttg acttctcaa agtcaatggg aaaggtaaac cacgcaccga ccaattcgcc  
13861 ctattgtat ttgcctaaat tcgcaatata gacttgata tcgtccatat attcacgtcc  
13921 ttctttgta gagattcaaa aatccctacc gcacttcggt tgggtacca ttctttgcg  
13981 gaacataaga aaacctta tattccaaa aagaacggtt ttatttaagc accaataatg  
14041 cgattgaata gctctagtaa aatgtctttt actccagcag cgttgaagac taagccaacc  
14101 gcaataatcg caataattaa aaagccaatc agtttgctaa actcacgctt gaagccaaga  
14161 tacaagcaa tcacaacgat tgctaaaagc accagtatt gagcgtttga tagaaaccg  
14221 ttataaagggt ttgtccaaa attcataaaa atgttctct ctctatattc aatgaattg  
14281 tatttgattt attttttgt tttatcacg tctgttctt ttactgactg ttgcttcaa  
14341 atctgcttgt gtcggtctgt cagtttcgca tggctgagaa tgtcttttac aacctgcgtc  
14401 tgggtgattt catcaagttt aatcgcaacc ttaaggtcg gggcaactg atgagatagc  
14461 cagttcagcg tcctttggaa ggagtaaggc tctggtttg tggtagttt taatcgttca  
14521 cgattgttcc caataacca agcccattct tcattcagtt tccaatcaga acgaggttg  
14581 gaatcgtctt tatctacaaa acggatatac cgattgataa ttttaaaggc ggtatgctct  
14641 ggattgtcat agacagtaa atcacggact gcataatagg cacgctcatt tttcaatcga  
14701 atctcaaac ggtttttac ttctgcgtct tcaatgggaa tatcattttt ctgtactgc  
14761 tcgtagtctt tttcatagat acagaaataa acttcacttt gtaatgaacc gatatagagg  
14821 gtgtttcca tacattcctt ttctctttg cgtaccagtt cgccactgcg atagcttta  
14881 aaactcggga agacggagat acattcttcc tgttggcact tttcagtgag tacagggata

14941 tttaaaatcc ctgtcttadc gttaatggca aggtcaaggc gtttcatcac accgccagcc  
15001 accaaaacgt ccataaagaa ctcataccag ctctttgtt gtgccagaag atagcttca  
15061 aattgtctgc acccagacc tttaattcc accagaactc ctttgtccag ttcattgggag  
15121 caaaggacga atatgtcgcc taaagcataa tgctctgaat aagaatagaa accatagtcc  
15181 tcatgaagaa aataggacag tttcagttgt aagatgtttt cgaccacctg ctgtactct  
15241 gttgtcggaa agcgaattct tacataatca aacagcattt caaggggagc gtcgggattg  
15301 aagcgtcca gagcttcca aaggactgc tgtaaactct ctgatggctt gacttttct  
15361 gttcaatat cgcttagata ctgccttga atacagtcg caacagtaa acggtttga  
15421 gatagtccat aagccaagcg ttttctttt aatgtctga accaagttg ttcattcagt  
15481 aaaaatcct ccaatcaaaa aggcgtatgt caacttttaa agcccattg acatacgtc  
15541 aaattttgta aatccctgt aaccaaagga ttttctaatg ttttttgac tgttctctg  
15601 cgattgtac cccctgtta gatacggggg gttaatgtct gccgtggcta ttgccacacc  
15661 agccagcaag atcagtccac acctcgcact tccgctcgc acgtcgcctg cgtggactgt  
15721 ctgctgttg ataactttt aatttctcc aagaatcat atccttttg tacaagggga  
15781 gtataaaact ctgatagac actgttctt acatcaacat agccacgacc tttgattcgc  
15841 ttaagaaga aatcctttg tagtactg ccaaacatca tgccatagcc catttcagac  
15901 atacgaccta aagccactc gaaattaac tgatcacgga tccctcgc taaatattt  
15961 gcgtctggac gttgacaag cagtattaga aagaagccag cttgacgacc taacatgaca  
16021 atctgttca gcttattcat aactcgggtg ttttctttg ttccagcat ttccatgaaa  
16081 ggcagctatt catcaaagat taagaagtgt gccgggagac ctaagtaagc ataattttg  
16141 ccagtcttat agttctcat ctgcttatt tctcactac gtttcatcat ttctcatag  
16201 aatgtttca tgcaagaaag caagtcttct tttctatagt agacattgc catcacagaa  
16261 cctaagtccg caagatcagc attttctggg tcaagaatat acagttttga atctgtatga  
16321 agcaaggctt caatcagtg cagtataaag taagttttac cgccactgt accaccagca  
16381 atcaacatat gagggagctt atcatattcc caccatagc tttcattaa gcgaagtta  
16441 ccatcttag ctctactc atcaatagaa atacgactgg ctatggtgct atagagcaaa  
16501 gtatattcca cataggaatc cttaactct ttatccgta gtcacagta caagccactc  
16561 tctaatttct tttcaagtg taagagtgg tcttgatatt ttccagcgt gatttccacc  
16621 cgtatctgta tcaagccatt ttaagtcca taatacatt tagggaagta ggttatctt  
16681 tcctttgac gaccagcact atctttaaag aaaccctctg tttgactg ttcagattca  
16741 taccattgt tttcaagtat catctttgcc agttttgac ggtggtaaag ttgttaacc  
16801 gtatcatagc gaaccgttt gaatacaaac gctaccagca agcagataag aattgcgaca  
16861 ctgaaactga taattaaata gggaaatgca atcttatctg cttgtgatag gttaaaatcc  
16921 tgccagttga tctgctggat tgtcttaca tgaaacagtc cgacaaccag caggaaaaca  
16981 ggcaggagt acgctatctg aaaatgaaag actaaactt taccagatgg gcgaatcct  
17041 ttaccagct gttcatgagc aaaaagtctc tttctacct agcactatt tctctgtgt  
17101 cggttctttc tttgcttggt gttgagctt gaataacta gaatccttg tcagcacaat  
17161 atcgtctgcc ttgatatacc agtcaacatc tgctcctga taggtggcag tagcaacggt  
17221 gtccgcaatg ggattgataa gttccaccg tgcgtataa tcaaactct tcaaaggcac  
17281 gctggcagga atactactt gaatcatgag tcttctctt ttggattta agtcataggt  
17341 acgttcttg atttcatctg aaaccgacc gcttctatt tggatttca cttcagcag  
17401 tagagcagag aatttcaatt ctcaaaaagt cgtgtcttta tcaatacaa tgccattgc  
17461 taatctcatc attttctc tcttctta ttctttatc atgtcgtcag catgtaaag  
17521 gtaatttga aaaccagag tgccgattt gtagccctc gcggaatac gtggattgac

17581 taacttcaca cgctcctcaa agccgaaatg ttttcgcca gcttcagcag gaagcaccac  
17641 cacaatatca tctgtctttt gaacatcaga atagagatta tagcttcttg ataagacagt  
17701 tagccgtccg ttgattcttc gctgaacgac tttatcctcg ccagcaaatt ctaaattgcc  
17761 gaatgttttt tccatgttgg gaatcacaaa ttaagtcc atatttttac ctatccttc  
17821 tttttattg gctgaatgaa tgtttgatgg tcttaaagag tggggaacga cttttgatt  
17881 cttgattttt tgttttcata agttcacttc ctttcaaat cgggtaaaaa aatagacacc  
17941 tcattttttg aagtgtctac ctattaaata ttcaaatttt attggaagta tctttatc  
18001 ttacttttc aaggataaat cgtcgtatca aagctcattc ataagtagta aattagtagt  
18061 aaattgagtg gttttgacct tgataaagtg tgataagtcc agtttttatg cggataacta  
18121 gatttttatg ctatttttct atataaaaat aattttatgc gctcttcttt tcccttaaa  
18181 t

//

DEFINITION Integrative and conjugative element ICE\_3

fasta\_record 1..80990

/ID=D90|SC|contig000002

/colour=5

CDS complement(366..1829)

/color=9

/locus\_tag="D90\_02917"

/note="Tyrosine recombinase, protein

motif:CLUSTERS:PRK00236protein motif:Cdd:COG4974protein

motif:TIGRFAMs:TIGR02224protein motif:Pfam:PF00589.16"

/product="Tyrosine recombinase [recombinase]"

/"ID=D90\_02917

/protein\_id="gnl|SC|D90\_02917""

/codon\_start=1

CDS complement(1842..2048)

/color=9

/locus\_tag="D90\_02918"

/note="Excisionase family DNA binding domain-containing

protein, protein motif:TIGRFAMs:TIGR01764protein

motif:Pfam:PF12728.1"

/product="Excisionase family DNA binding domain-containing

protein [excisionase]"

/"ID=D90\_02918

/protein\_id="gnl|SC|D90\_02918""

/codon\_start=1

CDS complement(2038..2739)

/color=9

/locus\_tag="D90\_02919"

/note="Excisionase family DNA binding domain-containing

protein, protein motif:TIGRFAMs:TIGR01764 protein

motif:Pfam:PF12728.1"

/product="Excisionase family DNA binding domain-containing

protein [excisionase]"  
 /"ID=D90\_02919  
 /protein\_id="gnl|SC|D90\_02919""  
 /codon\_start=1  
 CDS complement(2726..2977)  
 /color=9  
 /locus\_tag="D90\_02920"  
 /note="Excisionase family DNA binding domain-containing  
 protein, protein motif:TIGRFAMs:TIGR01764protein  
 motif: Pfam:PF12728.1"  
 /product="Excisionase family DNA binding domain-containing  
 protein [excisionase]"  
 /"ID=D90\_02920  
 /protein\_id="gnl|SC|D90\_02920""  
 /codon\_start=1  
 CDS complement(3084..3344)  
 /color=9  
 /locus\_tag="D90\_02921"  
 /note="Excisionase family DNA binding domain-containing  
 protein, protein motif:TIGRFAMs:TIGR01764protein  
 motif: Pfam:PF12728.1"  
 /product="Excisionase family DNA binding domain-containing  
 protein [excisionase]"  
 /"ID=D90\_02921  
 /protein\_id="gnl|SC|D90\_02921""  
 /codon\_start=1  
 CDS complement(3337..3915)  
 /color=8  
 /locus\_tag="D90\_02922"  
 /note="type II toxin-antitoxin system PemK/MazF family  
 toxin MazF, similar to AA sequence:UniProtKB:P96622protein  
 motif: Pfam:PF02452.11"  
 /product="type II toxin-antitoxin system PemK/MazF family  
 toxin MazF [toxin-antitoxin]"  
 /"ID=D90\_02922  
 /protein\_id="gnl|SC|D90\_02922""  
 /gene="mazF"  
 /codon\_start=1  
 CDS complement(4016..4555)  
 /color=7  
 /locus\_tag="D90\_02923"  
 /note="RNA polymerase sigma factor Sigma-70, protein  
 motif: CLUSTERS:PRK06759protein motif:TIGRFAMs:TIGR02937"  
 /product="RNA polymerase sigma factor Sigma-70"

/"ID=D90\_02923  
 /protein\_id="gnl|SC|D90\_02923""  
 /codon\_start=1  
 CDS     complement(4800..4997)  
 /ID=D90\_02924  
 /color=1  
 /locus\_tag="D90\_02924"  
 /note="hypothetical protein"  
 /product="hypothetical protein"  
 /protein\_id="gnl|SC|D90\_02924"  
 /codon\_start=1  
 CDS     complement(4994..5725)  
 /ID=D90\_02925  
 /color=8  
 /locus\_tag="D90\_02925"  
 /note="ImmA/IrrE family metallo-endopeptidase ImmA"  
 /product="ImmA/IrrE family metallo-endopeptidase ImmA  
 [pepidase]"  
 /gene="immA"  
 /protein\_id="gnl|SC|D90\_02925"  
 /codon\_start=1  
 CDS     complement(5745..5996)  
 /ID=D90\_02926  
 /color=1  
 /locus\_tag="D90\_02926"  
 /note="hypothetical protein"  
 /product="hypothetical protein"  
 /protein\_id="gnl|SC|D90\_02926"  
 /codon\_start=1  
 CDS     complement(5999..6298)  
 /ID=D90\_02927  
 /color=1  
 /locus\_tag="D90\_02927"  
 /note="hypothetical protein"  
 /product="hypothetical protein"  
 /protein\_id="gnl|SC|D90\_02927"  
 /codon\_start=1  
 CDS     complement(6311..7546)  
 /color=10  
 /locus\_tag="D90\_02928"  
 /eC\_number=2.7.7.7  
 /note="DNA polymerase IV, similar to AA  
 sequence:UniProtKB:Q47155protein  
 motif:CLUSTERS:PRK03103protein motif:Cdd:COG0389protein

motif: Pfam:PF00817.14"  
 /product="DNA polymerase IV [replication]"  
 /"ID=D90\_02928  
 /protein\_id="gnl|SC|D90\_02928""  
 /gene="dinB"  
 /codon\_start=1  
 CDS 7697..8107  
 /color=7  
 /locus\_tag="D90\_02929"  
 /note="helix-turn-helix transcriptional regulator ImmR,  
 similar to AA sequence:UniProtKB:P96631protein  
 motif:CLUSTERS:PRK09706protein  
 motif:TIGRFAMs:TIGR03070protein motif:Pfam:PF12844.1"  
 /product="helix-turn-helix transcriptional regulator ImmR  
 [transcriptional regulator]"  
 /"ID=D90\_02929  
 /gene="immR""  
 /protein\_id="gnl|SC|D90\_02929"  
 /codon\_start=1  
 CDS 8208..8741  
 /color=8  
 /locus\_tag="D90\_02930"  
 /note="ImmA/IrrE family metallo-endopeptidase ImmA,  
 protein motif:Pfam:PF06114.7"  
 /product="ImmA/IrrE family metallo-endopeptidase ImmA  
 [pepidase]"  
 /"ID=D90\_02930  
 /gene="immA""  
 /protein\_id="gnl|SC|D90\_02930"  
 /codon\_start=1  
 CDS complement(8783..9613)  
 /color=8  
 /locus\_tag="D90\_02931"  
 /note="GIY-YIG nuclease family protein, protein  
 motif:TIGRFAMs:TIGR01453"  
 /product="GIY-YIG nuclease family protein [nuclease]"  
 /"ID=D90\_02931  
 /protein\_id="gnl|SC|D90\_02931""  
 /codon\_start=1  
 CDS complement(9806..10192)  
 /color=10  
 /locus\_tag="D90\_02932"  
 /note="ParB/RepB/Spo0J family partition protein ParB-like  
 nuclease domain, similar to AA

sequence:UniProtKB:Q83AH2protein  
motif:CLUSTERS:PRK13832protein  
motif:TIGRFAMs:TIGR00180protein motif:Pfam:PF02195.12"  
/product="ParB/RepB/Spo0J family partition protein  
ParB-like nuclease domain [partitioning system]"  
/ID=D90\_02932  
/protein\_id="gnl|SC|D90\_02932""  
/gene="parB"  
/codon\_start=1  
CDS     complement(10201..11166)  
/color=9  
/locus\_tag="D90\_02933"  
/note="Plasmid recombination enzyme Mob\_pre, protein  
motif:Pfam:PF01076.13"  
/product="Plasmid recombination enzyme Mob\_pre"  
/ID=D90\_02933  
/protein\_id="gnl|SC|D90\_02933""  
/codon\_start=1  
CDS     complement(11691..12716)  
/ID=D90\_02934  
/color=10  
/locus\_tag="D90\_02934"  
/note="Replication initiation protein RepA"  
/product="Replication initiation protein RepA  
[replication]"  
/protein\_id="gnl|SC|D90\_02934"  
/gene="repA"  
/codon\_start=1  
CDS     13022..13477  
/ID=D90\_02935  
/color=1  
/locus\_tag="D90\_02935"  
/note="hypothetical protein"  
/product="hypothetical protein"  
/protein\_id="gnl|SC|D90\_02935"  
/codon\_start=1  
CDS     complement(13429..13854)  
/color=7  
/locus\_tag="D90\_02936"  
/note="RNA polymerase sigma factor Sigma-70 region 4,  
protein motif:CLUSTERS:PRK12522protein  
motif:TIGRFAMs:TIGR02937"  
/product="RNA polymerase sigma factor Sigma-70 region 4  
[transcriptional regulator]"



/"ID=D90\_02936  
 /protein\_id="gnl|SC|D90\_02936""  
 /codon\_start=1  
 CDS complement(13949..14461)  
 /color=7  
 /locus\_tag="D90\_02937"  
 /note="RNA polymerase sigma factor Sigma-70 region 4,  
 protein motif:CLUSTERS:PRK08583protein  
 motif:TIGRFAMs:TIGR02937protein motif:Pfam:PF04545.10"  
 /product="RNA polymerase sigma factor Sigma-70 region 4  
 [transcriptional regulator]"  
 /"ID=D90\_02937  
 /protein\_id="gnl|SC|D90\_02937""  
 /codon\_start=1  
 CDS complement(15174..17093)  
 /color=2  
 /locus\_tag="D90\_02938"  
 /note="Tetracycline resistance protein tetM from  
 transposon Tn916, similar to AA  
 sequence:UniProtKB:P21598protein  
 motif:CLUSTERS:PRK13351protein motif:Cdd:COG0050protein  
 motif:TIGRFAMs:TIGR00484protein motif:Pfam:PF00009.21"  
 /product="Tetracycline resistance protein tetM from  
 transposon Tn916 [antibiotic resistance]"  
 /"ID=D90\_02938  
 /protein\_id="gnl|SC|D90\_02938""  
 /gene="tetM"  
 /codon\_start=1  
 CDS complement(17460..17834)  
 /ID=D90\_02939  
 /color=9  
 /locus\_tag="D90\_02939"  
 /note="Transposon-encoded TnpV family protein"  
 /product="Transposon-encoded TnpV family protein"  
 /gene="tnpV"  
 /protein\_id="gnl|SC|D90\_02939"  
 /codon\_start=1  
 CDS complement(17815..18825)  
 /ID=D90\_02940  
 /color=10  
 /locus\_tag="D90\_02940"  
 /note="DEAD/DEAH box helicase family protein"  
 /product="DEAD/DEAH box helicase family protein  
 [helicase]"

/protein\_id="gnl|SC|D90\_02940"  
 /codon\_start=1  
 CDS 18851..19309  
 /ID=D90\_02941  
 /color=1  
 /locus\_tag="D90\_02941"  
 /note="hypothetical protein"  
 /product="hypothetical protein"  
 /protein\_id="gnl|SC|D90\_02941"  
 /codon\_start=1  
 CDS complement(19348..21057)  
 /ID=D90\_02942  
 /color=8  
 /locus\_tag="D90\_02942"  
 /note="Cysteine histidine-dependent  
 amidohydrolase/peptidase CHAP domain-containing protein  
 conjugative transposon protein"  
 /product="Cysteine histidine-dependent  
 amidohydrolase/peptidase %28CHAP%29 domain-containing  
 protein conjugative transposon protein"  
 /protein\_id="gnl|SC|D90\_02942"  
 /codon\_start=1  
 CDS complement(21098..21868)  
 /color=8  
 /locus\_tag="D90\_02943"  
 /note="Class B sortase, protein motif:Cdd:COG3764protein  
 motif:TIGRFAMs:TIGR03064protein motif: Pfam:PF04203.7"  
 /product="Class B sortase [transpeptidase]"  
 /ID=D90\_02943  
 /protein\_id="gnl|SC|D90\_02943""  
 /codon\_start=1  
 CDS complement(21906..24239)  
 /color=4  
 /locus\_tag="D90\_02944"  
 /note="Type IV secretion system protein TraC VirB4  
 components, protein motif:Cdd:COG3451protein  
 motif:TIGRFAMs:TIGR02746protein motif: Pfam:PF12846.1"  
 /product="Type IV secretion system protein TraC VirB4  
 components [ATPase mating pair formation]"  
 /ID=D90\_02944  
 /gene="traC""  
 /protein\_id="gnl|SC|D90\_02944"  
 /codon\_start=1  
 CDS complement(24232..24597)

```

/color=4
/locus_tag="D90_02945"
/note="PrgI family protein Type IV secretion system,
protein motif:Pfam:PF12666.1"
/product="PrgI family protein Type IV secretion system"
/"ID=D90_02945
/protein_id="gnl|SC|D90_02945""
/codon_start=1
CDS    complement(24597..24782)
/ID=D90_02946
/color=1
/locus_tag="D90_02946"
/note="hypothetical protein"
/product="hypothetical protein"
/protein_id="gnl|SC|D90_02946"
/codon_start=1
CDS    complement(24797..25633)
/ID=D90_02947
/color=1
/locus_tag="D90_02947"
/note="hypothetical protein"
/product="hypothetical protein"
/protein_id="gnl|SC|D90_02947"
/codon_start=1
CDS    complement(25707..26066)
/ID=D90_02948
/color=8
/locus_tag="D90_02948"
/note="Glutamyl-tRNA amidotransferase subunit A"
/product="Glutamyl-tRNA amidotransferase subunit A
[amidase]"
/protein_id="gnl|SC|D90_02948"
/codon_start=1
CDS    complement(26081..27877)
/color=4
/locus_tag="D90_02949"
/note="Type IV secretion system protein TraG VirD4
components, protein motif:CLUSTERS:PRK13897protein
motif:Cdd:COG3505protein motif:TIGRFAMs:TIGR02767protein
motif:Pfam:PF02534.8"
/product="Type IV secretion system protein TraG VirD4
components [coupling protein]"
/"ID=D90_02949
/gene="traG""

```

/protein\_id="gnl|SC|D90\_02949"  
 /codon\_start=1  
 CDS complement(27864..28067)  
 /ID=D90\_02950  
 /color=1  
 /locus\_tag="D90\_02950"  
 /note="hypothetical protein"  
 /product="hypothetical protein"  
 /protein\_id="gnl|SC|D90\_02950"  
 /codon\_start=1  
 CDS complement(28077..28961)  
 /ID=D90\_02951  
 /color=7  
 /locus\_tag="D90\_02951"  
 /note="LtrC-like late transcriptional regulators protein"  
 /product="LtrC-like late transcriptional regulators  
 protein [transcriptional regulator]"  
 /protein\_id="gnl|SC|D90\_02951"  
 /codon\_start=1  
 CDS complement(28967..29761)  
 /color=1  
 /locus\_tag="D90\_02952"  
 /note="PcfB family protein, protein motif: Pfam:PF12687.1"  
 /product="PcfB family protein"  
 /ID=D90\_02952  
 /protein\_id="gnl|SC|D90\_02952""  
 /codon\_start=1  
 CDS complement(29745..31115)  
 /color=4  
 /locus\_tag="D90\_02953"  
 /note="Relaxase/Mobilisation nuclease domain, protein  
 motif: Pfam:PF03432.8"  
 /product="Relaxase/Mobilisation nuclease domain  
 [relaxase]"  
 /ID=D90\_02953  
 /protein\_id="gnl|SC|D90\_02953""  
 /codon\_start=1  
 CDS complement(31106..31447)  
 /color=4  
 /locus\_tag="D90\_02954"  
 /note="Bacterial mobilisation relaxosome protein MobC,  
 protein motif: Pfam:PF05713.5"  
 /product="Bacterial mobilisation relaxosome protein MobC  
 [relaxosome]"

/"ID=D90\_02954  
 /gene="mobC""  
 /protein\_id="gnl|SC|D90\_02954"  
 /codon\_start=1  
 CDS        complement(31705..32622)  
 /color=1  
 /locus\_tag="D90\_02955"  
 /note="DUF3846 and DUF4314 domain-containing protein,  
 protein motif:Pfam:PF12957.1"  
 /product="DUF3846 and DUF4314 domain-containing protein"  
 /"ID=D90\_02955  
 /protein\_id="gnl|SC|D90\_02955""  
 /codon\_start=1  
 CDS        complement(32619..33572)  
 /color=10  
 /locus\_tag="D90\_02956"  
 /note="DUF3991 and TOPRIM domain-containing protein,  
 protein motif:Cdd:COG0358"  
 /product="DUF3991 and TOPRIM domain-containing protein  
 [replication]"  
 /"ID=D90\_02956  
 /protein\_id="gnl|SC|D90\_02956""  
 /codon\_start=1  
 CDS        complement(33588..34019)  
 /ID=D90\_02957  
 /color=1  
 /locus\_tag="D90\_02957"  
 /note="hypothetical protein"  
 /product="hypothetical protein"  
 /protein\_id="gnl|SC|D90\_02957"  
 /codon\_start=1  
 CDS        complement(33970..41772)  
 /color=8  
 /locus\_tag="D90\_02958"  
 /note="N-6 DNA methylase, protein motif:Cdd:COG4646protein  
 motif:Pfam:PF00176.17"  
 /product="N-6 DNA methylase [methyltransferase]"  
 /"ID=D90\_02958  
 /protein\_id="gnl|SC|D90\_02958""  
 /codon\_start=1  
 CDS        complement(41788..42471)  
 /ID=D90\_02959  
 /color=1  
 /locus\_tag="D90\_02959"

```

    /note="hypothetical protein"
    /product="hypothetical protein"
    /protein_id="gnl|SC|D90_02959"
    /codon_start=1
CDS    complement(42477..43034)
    /ID=D90_02960
    /color=1
    /locus_tag="D90_02960"
    /note="hypothetical protein"
    /product="hypothetical protein"
    /protein_id="gnl|SC|D90_02960"
    /codon_start=1
CDS    complement(43012..43245)
    /ID=D90_02961
    /color=9
    /locus_tag="D90_02961"
    /note="Tyrosine recombinase"
    /product="Tyrosine recombinase [recombinase]"
    /protein_id="gnl|SC|D90_02961"
    /codon_start=1
CDS    complement(43259..43852)
    /ID=D90_02962
    /color=1
    /locus_tag="D90_02962"
    /note="hypothetical protein"
    /product="hypothetical protein"
    /protein_id="gnl|SC|D90_02962"
    /codon_start=1
CDS    complement(44215..44304)
    /ID=D90_02963
    /color=1
    /locus_tag="D90_02963"
    /note="hypothetical protein"
    /product="hypothetical protein"
    /protein_id="gnl|SC|D90_02963"
    /codon_start=1
CDS    complement(44304..48554)
    /color=8
    /locus_tag="D90_02964"
    /note="Cys-Gln thioester bond-forming surface protein,
protein motif:Cdd:COG4932protein motif:Pfam:PF05738.7"
    /product="Cys-Gln thioester bond-forming surface protein"
    /ID=D90_02964
    /protein_id="gnl|SC|D90_02964"

```

/codon\_start=1  
 CDS complement(48625..49329)  
 /ID=D90\_02965  
 /color=8  
 /locus\_tag="D90\_02965"  
 /note="Prokaryotic membrane lipoprotein lipid attachment site profile"  
 /product="Prokaryotic membrane lipoprotein lipid attachment site profile"  
 /protein\_id="gnl|SC|D90\_02965"  
 /codon\_start=1  
 CDS complement(49561..50505)  
 /color=10  
 /locus\_tag="D90\_02966"  
 /note="ParB/RepB/Spo0J family partition proteinParB-like nuclease domain, similar to AA sequence:UniProtKB:POCAV8protein motif:CLUSTERS:PRK13832protein motif:TIGRFAMs:TIGR00180protein motif:Pfam:PF02195.12"  
 /product="ParB/RepB/Spo0J family partition proteinParB-like nuclease domain [partitioning system]"  
 /ID=D90\_02966  
 /protein\_id="gnl|SC|D90\_02966""  
 /gene="parB"  
 /codon\_start=1  
 CDS complement(50462..51286)  
 /color=10  
 /locus\_tag="D90\_02967"  
 /note="CobQ/CobB/MinD/ParA nucleotide binding domain plasmid partitioning protein ParA, similar to AA sequence:UniProtKB:P37522protein motif:CLUSTERS:PRK13869protein motif:Cdd:COG2894protein motif:TIGRFAMs:TIGR03453protein motif:Pfam:PF01656.17"  
 /product="CobQ/CobB/MinD/ParA nucleotide binding domain plasmid partitioning protein ParA [partitioning system]"  
 /ID=D90\_02967  
 /protein\_id="gnl|SC|D90\_02967""  
 /gene="parA"  
 /codon\_start=1  
 CDS 51893..52417  
 /color=8  
 /locus\_tag="D90\_02968"  
 /note="Putative NADPH-dependent FMN-containing oxidoreductase ywqN Flavodoxin family protein, similar to

AA sequence:UniProtKB:P96726protein  
motif:Cdd:COG0431protein motif:Pfam:PF03358.9"  
/product="Putative NAD%28P%29H-dependent FMN-containing  
oxidoreductase ywqN Flavodoxin family protein [electron  
transfer]"  
/"ID=D90\_02968  
/protein\_id="gnl|SC|D90\_02968""  
/gene="ywqN"  
/codon\_start=1  
CDS     53433..56477  
/color=8  
/locus\_tag="D90\_02969"  
/note="Sortase B-anchored collagen-binding adhesin LPXTG  
cell wall anchor domain-containing protein, protein  
motif:Cdd:COG4932protein motif:Pfam:PF05738.7"  
/product="Sortase B-anchored collagen-binding adhesin  
LPXTG cell wall anchor domain-containing protein  
[virulence]"  
/"ID=D90\_02969  
/protein\_id="gnl|SC|D90\_02969""  
/codon\_start=1  
CDS     56493..56762  
/ID=D90\_02970  
/color=1  
/locus\_tag="D90\_02970"  
/note="hypothetical protein"  
/product="hypothetical protein"  
/protein\_id="gnl|SC|D90\_02970"  
/codon\_start=1  
CDS     56710..57036  
/color=1  
/locus\_tag="D90\_02971"  
/note="YdcP family protein DUF961 domain-containing  
protein, protein motif:Pfam:PF06125.5"  
/product="YdcP family protein DUF961 domain-containing  
protein"  
/"ID=D90\_02971  
/protein\_id="gnl|SC|D90\_02971""  
/codon\_start=1  
CDS     57052..57435  
/color=1  
/locus\_tag="D90\_02972"  
/note="YdcP family protein DUF961 domain-containing  
protein, protein motif:Pfam:PF06125.5"



/product="YdcP family protein DUF961 domain-containing protein"  
 /"ID=D90\_02972  
 /protein\_id="gnl|SC|D90\_02972""  
 /codon\_start=1  
 CDS 57603..58010  
 /color=7  
 /locus\_tag="D90\_02973"  
 /note="Helix-turn-helix transcriptional regulator ImmR, similar to AA sequence:UniProtKB:P96631protein motif:CLUSTERS:PRK09706protein motif:Cdd:COG1426protein motif:TIGRFAMs:TIGR03070protein motif:Pfam:PF12844.1"  
 /product="Helix-turn-helix transcriptional regulator ImmR [transcriptional regulator]"  
 /"ID=D90\_02973  
 /protein\_id="gnl|SC|D90\_02973""  
 /gene="immR"  
 /codon\_start=1  
 CDS 58026..58352  
 /ID=D90\_02974  
 /color=1  
 /locus\_tag="D90\_02974"  
 /note="hypothetical protein"  
 /product="hypothetical protein"  
 /protein\_id="gnl|SC|D90\_02974"  
 /codon\_start=1  
 CDS 58453..59847  
 /color=4  
 /locus\_tag="D90\_02975"  
 /note="DNA translocase FtsKDNA segregation ATPase FtsK/SpoIIIE and related proteins, similar to AA sequence:UniProtKB:P64165protein motif:Cdd:COG1674protein motif:TIGRFAMs:TIGR03924protein motif:Pfam:PF01580.12"  
 /product="DNA translocase FtsKDNA segregation ATPase FtsK/SpoIIIE and related proteins [ATPase coupling protein]"  
 /"ID=D90\_02975  
 /protein\_id="gnl|SC|D90\_02975""  
 /gene="ftsK"  
 /codon\_start=1  
 CDS 60031..61227  
 /color=4  
 /locus\_tag="D90\_02976"  
 /note="XRE family transcriptional regulator Replication

initiation factor domain, protein  
 motif:TIGRFAMs:TIGR03070protein motif:Pfam:PF02486.13"  
 /product="XRE family transcriptional regulator Replication  
 initiation factor domain [relaxase]"  
 /"ID=D90\_02976  
 /protein\_id="gnl|SC|D90\_02976""  
 /codon\_start=1  
 CDS 61240..61374  
 /color=1  
 /locus\_tag="D90\_02977"  
 /note="DUF3789 domain-containing protein Putative  
 conjugative transposon protein Tn916-like CTn1-Orf25,  
 protein motif:Pfam:PF12664.1"  
 /product="DUF3789 domain-containing protein Putative  
 conjugative transposon protein Tn916-like CTn1-Orf25"  
 /"ID=D90\_02977  
 /protein\_id="gnl|SC|D90\_02977""  
 /codon\_start=1  
 CDS 61375..61596  
 /ID=D90\_02978  
 /color=4  
 /locus\_tag="D90\_02978"  
 /note="Conjugation related protein"  
 /product="Conjugation related protein"  
 /protein\_id="gnl|SC|D90\_02978"  
 /codon\_start=1  
 CDS 61800..62576  
 /color=7  
 /locus\_tag="D90\_02979"  
 /note="Helix-turn-helix transcriptional regulator immR,  
 similar to AA sequence:UniProtKB:P96631protein  
 motif:CLUSTERS:PRK09706protein  
 motif:TIGRFAMs:TIGR03070protein motif:Pfam:PF12844.1"  
 /product="Helix-turn-helix transcriptional regulator immR  
 [transcriptional regulator]"  
 /"ID=D90\_02979  
 /protein\_id="gnl|SC|D90\_02979""  
 /gene="immR"  
 /codon\_start=1  
 CDS 62876..63379  
 /color=4  
 /locus\_tag="D90\_02980"  
 /note="Antirestriction protein ArdA, protein  
 motif:Pfam:PF07275.5"

/product="Antirestriction protein ArdA [anti-resitricion  
 modification]"  
 /"ID=D90\_02980  
 /gene="ardA""  
 /protein\_id="gnl|SC|D90\_02980"  
 /codon\_start=1  
 CDS 63397..63900  
 /color=4  
 /locus\_tag="D90\_02981"  
 /note="Antirestriction protein ArdA , protein  
 motif:Cdd:COG4734protein motif:Pfam:PF07275.5"  
 /product="Antirestriction protein ArdA [anti-resitricion  
 modification]"  
 /"ID=D90\_02981  
 /gene="ardA""  
 /protein\_id="gnl|SC|D90\_02981"  
 /codon\_start=1  
 CDS 64018..64416  
 /color=4  
 /locus\_tag="D90\_02982"  
 /note="TcpE family, protein motif:Pfam:PF12648.1"  
 /product="TcpE family [mating pair formation]"  
 /"ID=D90\_02982  
 /gene="tcpE""  
 /protein\_id="gnl|SC|D90\_02982"  
 /codon\_start=1  
 CDS 64394..66844  
 /color=4  
 /locus\_tag="D90\_02983"  
 /note="Type IV secretion system protein TraC VirB4  
 components, protein motif:Cdd:COG3451protein  
 motif:TIGRFAMs:TIGR02746protein motif:Pfam:PF12846.1"  
 /product="Type IV secretion system protein TraC VirB4  
 components [ATPase mating pair formation]"  
 /"ID=D90\_02983  
 /gene="traC""  
 /protein\_id="gnl|SC|D90\_02983"  
 /codon\_start=1  
 CDS 66844..69039  
 /color=4  
 /locus\_tag="D90\_02984"  
 /note="Conjugative transposon protein Tn916 orf15-like MFS  
 transporter YtxH domain-containing protein, protein  
 motif:Cdd:COG0349"

/product="Conjugative transposon protein Tn916 orf15-like  
 MFS transporter YtxH domain-containing protein"  
 /"ID=D90\_02984  
 /protein\_id="gnl|SC|D90\_02984""  
 /codon\_start=1  
 CDS 69036..70043  
 /color=4  
 /locus\_tag="D90\_02985"  
 /note="Endopeptidase NLPC/P60, similar to AA  
 sequence:UniProtKB:P21171protein  
 motif:CLUSTERS:PRK13914protein motif:Cdd:COG3584protein  
 motif:Pfam:PF00877.13"  
 /product="Endopeptidase NLPC/P60 [pepidase]"  
 /"ID=D90\_02985  
 /protein\_id="gnl|SC|D90\_02985""  
 /codon\_start=1  
 CDS 70059..70970  
 /color=4  
 /locus\_tag="D90\_02986"  
 /note="Conjugative transposon protein TcpC, protein  
 motif:Pfam:PF12642.1"  
 /product="Conjugative transposon protein TcpC [mating pair  
 formation]"  
 /"ID=D90\_02986  
 /gene="tcpC""  
 /protein\_id="gnl|SC|D90\_02986"  
 /codon\_start=1  
 CDS 71091..71468  
 /color=7  
 /locus\_tag="D90\_02987"  
 /note="GntR family transcriptional regulator  
 Helix-turn-helix domain-containing protein, similar to AA  
 sequence:UniProtKB:O34817protein  
 motif:CLUSTERS:PRK09990protein motif:Cdd:COG1802protein  
 motif:TIGRFAMs:TIGR02325protein motif:Pfam:PF00392.15"  
 /product="GntR family transcriptional regulator  
 Helix-turn-helix domain-containing protein  
 [transcriptional regulator]"  
 /"ID=D90\_02987  
 /protein\_id="gnl|SC|D90\_02987""  
 /codon\_start=1  
 CDS 71469..72332  
 /color=8  
 /locus\_tag="D90\_02988"

```

/note="ABC transporter ATP-binding protein, similar to AA
sequence:UniProtKB:P0A9U1protein motif:CLUSTERS:PRK13536
protein motif:Cdd:COG4555 protein
motif:TIGRFAMs:TIGR01188protein motif:Pfam:PF00005.21"
/product="ABC transporter ATP-binding protein
[transporter]"
/ID=D90_02988
/protein_id="gnl|SC|D90_02988""
/codon_start=1
CDS    72329..72973
/ID=D90_02989
/color=8
/locus_tag="D90_02989"
/note="ABC-2 transporter permease"
/product="ABC-2 transporter permease [transporter]"
/protein_id="gnl|SC|D90_02989"
/codon_start=1
CDS    72986..73177
/ID=D90_02990
/color=1
/locus_tag="D90_02990"
/note="DNA-binding protein"
/product="DNA-binding protein"
/protein_id="gnl|SC|D90_02990"
/codon_start=1
CDS    73382..73570
/ID=D90_02991
/color=4
/locus_tag="D90_02991"
/note="Cystein-rich KTR conjugal transfer protein"
/product="Cystein-rich KTR conjugal transfer protein"
/protein_id="gnl|SC|D90_02991"
/codon_start=1
CDS    complement(73678..74037)
/color=7
/locus_tag="D90_02992"
/note="helix-turn-helix transcriptional regulator, protein
motif:TIGRFAMs:TIGR00270protein motif:Pfam:PF12844.1"
/product="helix-turn-helix transcriptional regulator
[transcriptional regulator]"
/ID=D90_02992
/protein_id="gnl|SC|D90_02992""
/codon_start=1
CDS    74209..74418

```

/color=7  
 /locus\_tag="D90\_02993"  
 /note="Peptide-binding protein Omega Transcriptional Repressor, protein motif: Pfam:PF07764.5"  
 /product="Peptide-binding protein Omega Transcriptional Repressor [transcriptional regulator]"  
 /"ID=D90\_02993  
 /protein\_id="gnl|SC|D90\_02993""  
 /codon\_start=1  
 CDS 74435..74707

/color=8  
 /locus\_tag="D90\_02994"  
 /note="Plasmid epsilon-zeta postsegregational killing system antitoxin, similar to AA sequence: UniProtKB:Q57231 protein motif: Pfam:PF08998.5"  
 /product="Plasmid epsilon-zeta postsegregational killing system antitoxin [toxin-antitoxin]"  
 /"ID=D90\_02994  
 /protein\_id="gnl|SC|D90\_02994""  
 /codon\_start=1  
 CDS 74919..75338

/color=8  
 /locus\_tag="D90\_02995"  
 /note="Plasmid epsilon-zeta postsegregational killing system Zeta toxin AAA family ATPase, protein motif: Pfam:PF06414.6"  
 /product="Plasmid epsilon-zeta postsegregational killing system Zeta toxin AAA family ATPase [toxin-antitoxin]"  
 /"ID=D90\_02995  
 /protein\_id="gnl|SC|D90\_02995""  
 /codon\_start=1  
 CDS 75385..76122

/color=2  
 /locus\_tag="D90\_02996"  
 /eC\_number=2.1.1.184  
 /note="23S rRNA adenine(2058)-N-methyltransferase ErmB, similar to AA sequence: UniProtKB:P21236 protein motif: CLUSTERS:PRK14896 protein motif: Cdd:COG0030 protein motif: TIGRFAMs:TIGR00755 protein motif: Pfam:PF00398.14"  
 /product="23S rRNA %28adenine%282058%29-N%286%29%29-methyltransferase Erm%28B%29 [antibiotic resistance]"  
 /"ID=D90\_02996  
 /protein\_id="gnl|SC|D90\_02996""

/gene="erm"  
 /codon\_start=1  
 CDS 76127..76258  
 /ID=D90\_02997  
 /color=1  
 /locus\_tag="D90\_02997"  
 /note="hypothetical protein"  
 /product="hypothetical protein"  
 /protein\_id="gnl|SC|D90\_02997"  
 /codon\_start=1  
 CDS 76655..77533  
 /color=10  
 /locus\_tag="D90\_02998"  
 /note="ParA family protein CobQ/CobB/MinD/ParA nucleotide binding domain, similar to AA sequence:UniProtKB:P37522protein motif:Cdd:COG4963protein motif:TIGRFAMs:TIGR03453protein motif:Pfam:PF01656.17"  
 /product="ParA family protein CobQ/CobB/MinD/ParA nucleotide binding domain [partitioning system]"  
 /ID=D90\_02998  
 /protein\_id="gnl|SC|D90\_02998""  
 /gene="parA"  
 /codon\_start=1  
 CDS 77981..78397  
 /color=7  
 /locus\_tag="D90\_02999"  
 /note="RNA polymerase sigma factor Sigma-70 region 4, protein motif:Cdd:COG2739protein motif:TIGRFAMs:TIGR02937protein motif:Pfam:PF08281.6"  
 /product="RNA polymerase sigma factor Sigma-70 region 4 [transcriptional regulator]"  
 /ID=D90\_02999  
 /protein\_id="gnl|SC|D90\_02999""  
 /codon\_start=1  
 CDS 78404..78652  
 /color=7  
 /locus\_tag="D90\_03000"  
 /note="helix-turn-helix domain-containing protein, protein motif:Pfam:PF12645.1"  
 /product="helix-turn-helix domain-containing protein [transcriptional regulator]"  
 /ID=D90\_03000  
 /protein\_id="gnl|SC|D90\_03000""  
 /codon\_start=1

CDS 79047..79304  
 /color=9  
 /locus\_tag="D90\_03001"  
 /note="DNA binding domain excisionase family, protein motif:TIGRFAMs:TIGR01764protein motif:Pfam:PF12728.1"  
 /product="DNA binding domain excisionase family [excisionase]"  
 /"ID=D90\_03001  
 /protein\_id="gnl|SC|D90\_03001""  
 /codon\_start=1

CDS 79323..80768  
 /color=9  
 /locus\_tag="D90\_03002"  
 /note="Tyrosine recombinase, protein motif:CLUSTERS:PRK00236protein motif:Cdd:COG4973protein motif:TIGRFAMs:TIGR02224protein motif:Pfam:PF00589.16"  
 /product="Tyrosine recombinase [recombinase]"  
 /"ID=D90\_03002  
 /protein\_id="gnl|SC|D90\_03002""  
 /codon\_start=1

BASE COUNT 22329 a 17547 c 17143 g 23971 t

ORIGIN

1 tccggccttc cccttaggag aagccccga ggggcatttt tgactcccta caaatccccg  
 61 aaaatccttg attttactgg cttttctggg atttactgt tagtaaattc tcgtccaaaa  
 121 cctgctaatt tttcgtggtt ttttgcttc cttttagcag ggtattagca aatgcaaaga  
 181 aatatgggaa acatcattga gttaatctgt agcccataaa tcacaggaaa cgcatttgaa  
 241 gtttacgcat tctctatgc aatcaataa tctgtgttca aatattataa tggtttttct  
 301 tcttgatttc aagatttttc aggaattaca aaaggcaacc ctgacggatt gccttttttg  
 361 tatgactaaa ttgttttcgc taaagccttt aataatgctg ctgtttccgg atttgataac  
 421 agttttgtga gcaaggcggc gttttcatct gtactgttct cagcaggctt ttctttttca  
 481 acttcgctct ctttttgaac ctctgccatt ggggtcaagga gttaaccga agtttcaaac  
 541 ttgggcattg gagcagtttt accttcttcc gcatttttga gaccttagc gttgtagaac  
 601 tgttcctcaa acttctgtgc gttatatcgc ctgtcctcgt cgattatatg gctgtaaaca  
 661 tcggcaacca tatccattcg ggcgtgtcct gtagtcctt gaaccgattt catatcgccg  
 721 ccgttccatt tcagcttgta ggttatactt gcgtgacgga agctgtgaaa taccacatcg  
 781 ggtaagtctg tgcctgtat cagcttttc aaagcacggt tgattacctg accttccatc  
 841 ggtctgcctg acgaatggca gaataccaag tcataatcca aatactcatc accgaaaagc  
 901 tctttcattt cgtaaatctg cttttttctc tctaacagca tttgagctac ggttgacggc  
 961 aagaagattt ttctcacact tgtttagtt tttggcgttt tcaaaacaag ggaggtattt  
 1021 gtattgaca gagttctcgg aaagacacgg ataatgtcct tattatcaag cacctccatt  
 1081 acatctctgt ttactcgtg aagctcttta tctacaaaaa tggaagcgtt gttttcttc  
 1141 aggctttcct ccgaaatc aatgcaatcc caagtaagac cgagcatttc acccatcgg  
 1201 agtgaacagg caaaggataa attgatggct aatgcgagaa tatcatcatc gcacacttca  
 1261 agagcgtgca taagagtttc tgctgtccat atttctcgtt tctgatgttc ctcttcggg



1321 agcgttgcat tgagaaccgg gtttctgtc atcaactccc atttaccgc ctgattaaag  
1381 gcactcctta aaaacttatg gatttctctt acggtatgta cggtcagata ctcatthta  
1441 ggctthttat tctgtaccac tttggtctta actttcagaa ggctttgata gaatttatcc  
1501 ataagtctcg gtagcagttc atcaagtttc acatcgccga taagcggaaat gatgtaatta  
1561 tacataagcc ttttcttga acggtaggtt gacattgccc agttatttac tccgtacacg  
1621 gagcagtatt cttcaagcaa atccgcaact gtcgtagcat taggaatgat gaatgtaccg  
1681 ctttgctgtt caaactcaat ttgagttttt ctctthtttag cgtctgctgt tgtatcaaag  
1741 gtttccatt tttgatgttg gtttccgtca tcgtctttgt aggtataaac gacggaatat  
1801 cgattctttc tctttacaat agaagccata gtcgttcctc cttattcatt atccagccat  
1861 ttatcaaagc tgggtctttat tatgctggtat ccggtttcga gcattactgc ctgaaaacac  
1921 ccctgtttga tgagcttata tacggtctgt cgggtaatac ccaagattga ctgaacttcc  
1981 tctacggaat agctctthtt tgtatatgta ccgccgttha attcacgaac tctatctca  
2041 atcgacatat ccctctacct cctcgatttc cttactttha gtgtatttac tttgcaagc  
2101 gtaccactta tcaaagcttt ctctthttat tcggcgttha ccgtcaacc atataaactc  
2161 aacaatgcca tcgttcaaa ggtcatttgc ggtgcttctc ggaatgccga gtacctttgc  
2221 aacagtaaga ggagagagcg ttttgccgta tttctaccg ggtctttcgc cgtttacttt  
2281 tcataatgg aattgtctcg cataccaatc tcaaagcta tccacatcaa ctctcatttt  
2341 gccagttacc aaataggtct taaatcggca ctgattgatg agtcggtatg tagccgtctt  
2401 tccaagaccg agtatttca ttacgtcggg tacagacatt gtctthttgt cctgatatgt  
2461 aagaactgcc ttgacgattt tctattttc ttcaacgctt ttcttgaag ctctgtattc  
2521 gttgccgact cggtatgttt tgaataagcc gcaattcatt agtttcagtg ctctctctc  
2581 ggaaatggaa aacaaccgag atatttctt gacagaatag gcttgccact gtgcttctc  
2641 ctgaagcttt tcatcgtga acaattctgc caagcgttca ttttctctc tgagattaa  
2701 ctgctccact cggtcattga acatattaac aaatgccatc ttcagaacct ctttctcgc  
2761 cattgagcca atttcaaag ctctthtttag atattcgata ttgacctcg acacgaacgc  
2821 tatggaattt cttgctthta agcagctcat agacggtagt tctgctcact ttcaagatgt  
2881 gctgtatata atctaccgtg tatgctcgtat taccaggtc agtctgctg aatgtattag  
2941 gaagtcgagt atcgtctttt tcaattttct ttgcattac cgtttacccc cgatttctta  
3001 tttgccactc tgactacat atagccaagt gacttggcta tatggtactg aaaatcggag  
3061 tttttgtaa ttatcgtatt ggtttaatcg cataattgac aaccggagct ttctgtctc  
3121 atattatcaa gccatcggtc aaagctctt ttggaaattc tgtaatgtcc gccgacctt  
3181 acaaaatgga aaacgcctga gttgacgaga gcataagcag tgttcttcc aatgtgaga  
3241 atatcatta tttctctac cgtataaact ctttctcaa agccggaact atcatcaaca  
3301 gcgttgggta gttgttcat tgcttcaatc ttatcttcaa acattgtcaa cacctcctt  
3361 agcgtgatga tggttctttt tgaaaatcat atagtcatag ccgtatccta cctgacatt  
3421 atcgcacatc tctttatctg cctgaaaggg gtcaagtctt ttacaatgt ttcagggat  
3481 agactgaaac tcgcttctgc aacgagggca aagacttagt acaatgcctt tacgctctgt  
3541 cttgggttha acgggaatac cgactgcaaa ttcaatcct cgcttgattt cgctgattt  
3601 atctgctgc gtaattctt cgacaaaatt atcaagctt gtggctttat ccacggtgag  
3661 tagctgctca agcattacca tcgacggctc tttaagcca caatccgtgt ttagctcaat  
3721 atgagtattc attgccgtt tctthttaac agccgttata gcggctaaa cgaccgtagg  
3781 actgcttca ttaagcgtat ttgtctgaac cacaagaacc ggtctcattc ccgattgac  
3841 actgccgtt gtaacccca agtcgcagta ataaatctg cccatctga cattcttaa  
3901 ttctthttct tcatatgta aatcctcgtc ttgattatt ctgaggtaat tcatatccg

3961 attagaatta accccttcac ttgtttgaaa tgggagagcg tttttggggg gtgttttaga  
4021 aaaatttct caacttttt attgactgt ttaccgattc ccttacagaa gtaaaatcga  
4081 ctcttcttc atctgcgatt ttttcaagt ttttgttga gaagaaatac ttaaaaactc  
4141 tgcgtttctg tgtttcgctt aagtaacaca aaacctccg aagtcgctta atattgtctt  
4201 tcagcattat ttcttcgatt gggctgtat cgactgcaa ttccggatga tgcacttcaa  
4261 atttccgctc attgatgtca aatgcgtgct cgaaaagaag ctttctcatt ctctctctg  
4321 cttcgtagtt ctgatactcc gttatcactt cgccctgagc catagaaagc agaatgaacg  
4381 gagttagcgc acggataaca tcagggtatt taaccacaa ttttcttcc gccagtctg  
4441 ttacaatgc ccaatttctc gtccgggtg agccgtgata ttcataccgc aggttaatga  
4501 gcttgacgc gttcgcaaat aataattct gttgttctaa tgtaagttt gtcattgtc  
4561 taatctcctt aaatttgaat ttttgaattt gttgaaatc aaaaattcgg agattacgga  
4621 tacttggcga tatacggcag ccaattat gtcacggtct tgctccttc gggagcgaca  
4681 aaaaagcgg acaccaagaa cattaggata tttctatccc ttaatttca gcgtccggca  
4741 atttgatgac tcaagagctt tcgctcaagg actcgtggct cggatcatct gtccgatatt  
4801 taattgttcg ctctgttact acttctgtt aatctgtact tgactgttcc cttgcgtagg  
4861 gataggtaa cctctactac tctgtggcag ttcggacatt tcagttcaat cacgctgtt  
4921 gtcattgtta cttgtcaaa aatacggcag ccacagttt tgacactac gattatctt  
4981 tgttccaacg atttcatagc tcgctcacct ccgataaac cgtaacaaa tcaaaaggat  
5041 tatcaagata ctctttttc aaaagtccga gctgtttcat tcgtatagca agtgctttt  
5101 tggaacacc taaaaatcc gcaagtgcac caaatctct atatacgtc gtagatata  
5161 tttgttcag aactcaatc ttttctcaa gactgaacag atacattccc tgcttataa  
5221 ggttttcggg aagaaggata gcagctcaa gcgtatttgc ctgccattcc tccaatcgg  
5281 atataggctt atttctctc gaatttgcct tgtaataatg tactccggca gatttctgtg  
5341 tcacaccgta atcattcggg aacaacatct taaatatctg atggctgccc tcgtgcatta  
5401 agtgaaatt ctttctgcct ttcagcttgc tgtcaaagtt caagtcctt tccacgagaa  
5461 cggtttttc atcaaaaag aaaaaggctt cgttatcatc atctcaaat acctgaacac  
5521 ccatttccg aaatgagtc attccgagaa tactaccgtc ataagatagg tgctgttatt  
5581 cgacattcaa tccgagaacc ttctcaaga gaagctccgg gtcaattctg tatattgtg  
5641 tgttacggac atcgggaagt gccatatatg cctgaacata ctgtcggca atcgcttca  
5701 tgtcaaatc cgataaatg tcaagttac aaaacctcct accattagga tttgcttct  
5761 acaaccact ttcgttttc ttcgtcaac agaatgtgg gcttccgca aatctgtacc  
5821 gtgtacgga taccggttcc tccgacttg gtggaagccg cacggcattt ctgaattaca  
5881 cggctatct catattttc atcatttca aacttgatga agttcggacg agccgttcca  
5941 tcaggctat gtgttacatt tacttcaaca taaactttc ttcttcgga ttccatttt  
6001 attcctcga atttctcaa gtcaaaaacta atcttccaa gtgcttcat cgtcgtatg  
6061 tcttatcca caccctgtac ttgggtcgg catctccgc agtattgatg taacaggaaa  
6121 gccttctt cttaaagcgt ttttccggt caaagaaaag aaacattccc tcatatatac  
6181 cgtagtcggt aaaatggtt ccgccgtccg cacgaaagat aacaatatct tcgctgcacc  
6241 cctgcaaaaa gcagtcgggc atcgtaacat aagccgtaac ctcttttcg tcaatcacat  
6301 ttagacctc ttaaccaacc atacctgtc gcatagtat ttcggcttt tccggtgga  
6361 gccgaagtt ctgacacaga acccattcc ttatgctgtc ctttccgaaa cggcgtctga  
6421 ttttcaac acattttcc atctctcca attgtctctg ctttccggcg tccataaaca  
6481 tatctattg acggggcgtg tctgtggaa taagattat ggcttact gtcacagaac  
6541 gtagtaggtt attccacca tatcttttt caaacaactg aaaagcgtc tttgaataa

6601 tcatcgga ctgttagga agtgcaatct tcgtctgcca ttgccttgta ttgagcgtgt  
6661 tgtctctaat atgtattgcg acaccttctg cactcagtcg gtgaacacgg agcttgtgtc  
6721 cgatgtcttg ggtaattcg agaaacacgg gccacacctg ctccggtttc tctaaatctg  
6781 ctactgttgt tatacctgtg cctacacttt ttataggaga aacgaagtct ttcttgcaa  
6841 caagggaaag gtcgttgccg ttggcatagt tccataaaac tactccgttc tttcctaac  
6901 ttctgcgtaa gaactcaggg tcgttattcg ctaaatcccc gatggtacga atacaatagc  
6961 tgtcaagcac tcgctgggtt gccctccta caccgagcag gtcagcggta ggaagtcccc  
7021 aaatcttttc ttgaatgta tcctttggta taacggttac tgcgtccggt ttcttcata  
7081 ccgagccgag cttgcaaat atcttattaa aggaaacacc cacagaaatc gtcaagccga  
7141 gttcaaactt catcgtttca cgaatttcat ttgccacctt ttccggcgaa ccgaaaaggc  
7201 tttctgtccc gctaataatc agccaacact cgtccatacc atacggttca acttggctcg  
7261 tatatcgctc ataaacgctt ctgcaagct ttgagtattt gatatactcc tcataatggg  
7321 gcggcactac aaccaagtcc ttgacttct gtttagcctg ccatactgcg tccccggtt  
7381 tcacatcaaa agcctttgct ttgtagttct ttgcaagcac gatacctgtg cgttcctca  
7441 cagagccgca gacagcaatc ggatatttct tcaatgcggg gtcgagcata cattcgacgc  
7501 ttgcatagaa gttgttcata tcacaatgaa gtatgcttcg taacatttt tgaaccccc  
7561 ttgacatttt gggaagtta gtgtaaaacta tgagtagttc aacttctgt ttcttattat  
7621 acgcagttta agtgacttg tcaagagtaa atgagaagtt aaactgtaa tttctttta  
7681 aggagtgaaa tcaaagatga cattcgggtga aaaagtcaaa gcagagagga ctaaactcgg  
7741 tcttaatcag gatgaattgg ctgaaaaaat aggcgtaacc cgactgtaa ttgttctta  
7801 tgaanaatgat aaatcccgtc cgagaggaac ggaaagatac aagaagctgg cagaagcatt  
7861 aatgtaaat gtgaattatc tgctgtctga ggatgacgct ttcatcgccg atgtagagga  
7921 taaatacggc cgagagggg caagacagc tcaggagtgt cttgcagaag ttaccggtc  
7981 gtttccggc ggcgaaatgg ctgacgaaga tatgctgaa atggttgacg ctattcagga  
8041 agcatatctt attgcaaga agaacaataa aaaatacacc ccgaagaaat accgcaaga  
8101 cgagtaatcc tcacagtga ctaagtcaa tatatgggac acacaatagt ttataatta  
8161 ttataggta aatatccgat atactataat atgggaggtg agccggattg gggtattaca  
8221 ctacggctga aattgtgaa atcgtcaaca agctcattga ccgttgcggt actcgtgacc  
8281 cgtacaaggt cgcaaaagag cttggtatca atattatca ccgagattt gaaaagcagc  
8341 gtggagcata caagtcatt ctgaagaacc gctttgttt ccttaaaaac ggtatgcacc  
8401 cggctgtgga acagatagt ctatggcagc aaatcggaca cgatgttctc cacaggcaag  
8461 aagcgttgc tgcggcggg ttcaagagt tcaacatctt tgatatgaga gagaaccgta  
8521 tggagtatga agcaaatatc ttcgcttctc aggcttcgct cccggacgac accatttgg  
8581 aatacattga aaacggctat gacattcagc agattgcagc ggcaatgtgt tccgacataa  
8641 acctaattgc tctgaaagta gatacgtga ttgcacaagg ctatcaactt cgcaaacagg  
8701 aacacaaaa cgatttctt aaatacagta aaaaaatata agaccgtaa gtctcgaatg  
8761 agatctgacg gtctaattt tatcagttt tattatatcc gaattgtctt gtgcaaagg  
8821 tatctttcca ctttttca cgactcagta tgtaattatc atccattcgt gcgttatagt  
8881 tttctaatac tgaactga aaattgctt ttatataatc aaacccttg gtgcaacaa  
8941 tatgttaag ttcaacattc ccaccgtgc cattgtctat atagttagtc caccttgaa  
9001 gcaacattcc atactgagca gttgccgagc caacatacat tttccggtg ctggtatcg  
9061 ttataagata aactgctttt tgatttctca aagcatcaag ccaaccgctg cgtttattcc  
9121 gaataatcgt ttccagttgt gaaaaactca atcttatgtt tcataacc ggaaattcgt  
9181 caccatcata agcagttgaa agaatttcta ttactccag ttctccatc atagactcat

9241 aggttcttcc cataccacgc ttcgtattgt gatactcaa tactaatctg ccgtaatact  
9301 tacgatattc ttcaatttcc tcagcttcaa agccgacatc atcaacgaca tcaatctctt  
9361 ttgtaatcct ctaaatcgtt gtagcaacc atttatcatc atagaggtaa agcagacaaa  
9421 ttgcaatctg tcccgtatgg aaatatcttc tttgattgtg ccacaaaaac cactctatgt  
9481 taattttatc agggctctt ttgtattcct ctaaagggtc tgtatttcca ttgaaaacat  
9541 tcaactgag tctggttita ccaatatcac aatccggtat ctaagtaag tegtattca  
9601 gaattctatc cattacatat ctcttattc gtgcaggaaa acctaatat aatcttgac  
9661 ccacgagcct tcttttctt ttgaggaat cttaccgaaa aggagcttcc cggcgtccat  
9721 caggcgagca aatattacat tatcctgctt cggcacataa ccgatttita cgccgtcaac  
9781 agttttaata acaatcgctt gcttatcata agtctgtgcg gaaaccctgc cgcttcatgg  
9841 cttcggattt catcttgtaa gaaaacgccc gctccgatgg caggatattc tcacgtgca  
9901 aattgctgtc tacaaggggtg atgatggctc ggtcacggtc taagggcagg acaaacgag  
9961 gcacggattt tatccctgca agttcagaag cacggacacg ccgctgtcct gcaatcactt  
10021 cataaccgtc cccgtctctt ttcgggcgtg tgattatcgg cgtgacaatg ccaaattcct  
10081 tgatgcttcc cgtaactct gacagtgtt catcttctgc cacatgaaac ggattgtcgg  
10141 ggaacgggta caagtcttg gtctttaaca ccttaaaatc ctgtttctc attcacatat  
10201 ctacctttc ttcgctctgc ttctatgatt tttctgcaat tctccaaca cttcgggcgg  
10261 tatttttgac agcagccgcc ccatctgctc gttggttctc tgcaattcaa atatctctg  
10321 attcgtttc tgcacctta gttctgctc gtactttca tcacgatac gccccgata  
10381 gtctgattcc tgcccaattc tcttttcaa actgtcgata tacgcctgct gttcccgat  
10441 ttcttagag aatttctcca cgtctggcag ccatgcagag agtaaatcta acgctttatc  
10501 ctttttctc cctcggttaa aggcgttgat gtcggatagg gcagacacga tttctcata  
10561 ctgtttatca agcctgccg ctaattata gagccatgtg gggacgtgtt tccgcttgg  
10621 ttccattgag gactgcccc gttaagctg attccaccgt gaggacatcc gctcatgga  
10681 ggcggtctgc cactcggata atgatttctg gttgcctaag atagcttctg ctgacagctt  
10741 attgtctggc gtaatcgga caaagcagag gtgcatatgg ggcgttctc cgtccatag  
10801 gacgacagcg gagaggatat tctgcttcc aacacgctcc gaaatgaagt caagagccgt  
10861 ctggaaatac gcttttgtt cttcgggcgg taactggtc ataaattctg gtgaagctgt  
10921 gatgagcgtt tccacatca tcacgtgctc tttcctgtc ctgcacccc cttcggctac  
10981 catcggtta atcttttct ttaggtgta ctttgggtgt gctatgagat ggtaattgtt  
11041 ttagagcgt tccatatcta tatctgggtt gctttttag gcttcttct tccgctcgtt  
11101 gtggcgttca caagccgca cgcgccccg ttttcttctc tggaaacgca ggattgcata  
11161 aggcataagg ggattcctcc tttcttctg cgggtgaccg tcctttgggg tgacagcgg  
11221 gacggtggtg acagcagttt tgggataccc cctgccgact gccgcaactg tcaccctcac  
11281 cccctgcatg acggtcatgt cgatgatgac ggtgttttgg gatacccc ctcgcaagag  
11341 ccgtcaccgt catgccca tcttttctc cgaagccgta aggcgtagga tagcaggga  
11401 cagccctgcc ttaaggaggt ccagagggaa cgtctggcac acgactttg agggcaaaagt  
11461 gtagtgtgtt acaccctgta aacgcagtcg gaaaaatcgg aatgatttt ctgaccgcag  
11521 ggggtgtttt acacgaccga aaaggcgag taaatctcac gcctgcattt tgcgtttacg  
11581 ggggtgttct ccgtagggat gacagcggca ggtatccta aatcactgt caccaccgtc  
11641 actgctgta cccgagggc agagccgca gctttacatg gctttaagcg tcaatgacag  
11701 taacaggggg gtatccta atcgtgtca ccaccatcac cgctgtcacc cgccctcctt  
11761 gcaagggca tccgctgcc gtcttctctg cggctgtact gtagcagat acggttctg  
11821 cttaaaaatg tggtcggta ttattcagc catttcgtaa tcaccgtggg tatggttcc

11881 gtttcccca tagcggctaa cagttccgtt gccgtgccta tccattcttc cttatccctc  
11941 ataaaatcca ccaaccgaaa aaggacatct ggtatcgttt ctttcgcaag ctgctcctgc  
12001 gttttccgct ccacaagctc ccaacggcaa tcacggaaac gcagcgtgta ttctgataa  
12061 ggcgtgtccc tgcccgtcac atacagcttg gcggtgtcag acgcacgttt ctcttttcc  
12121 agaacaaagg tagcgtccgc actccccgtt aatcctgtcg tcccagacac cttgttgaac  
12181 acgtcgtgt cattctgctt tcggatgtgg tgtacgacaa tgaccgccag agagtgcctg  
12241 tcggcaaagt cttgatgag ggagatgtcc ccatagtcgc ttgcataggc attgtcttt  
12301 gaagctgtac ggactttctg caaggtatca atgacaatga gcctgctgtc tgggtaatct  
12361 ttcagataat ctcaagctg cacgataaga cgtctgaca gttgcagct tgccaaggca  
12421 aagtggagcc gcccgcttc ttcgtccgtc aaacgaaata acctgtcctg tatgcggcag  
12481 aacgtgcct caaggcagag gtaaagcaca tcgccctca ttgtcggcat atcccataa  
12541 gggattccct gcgacacgca taagcatagc ttcagcatga gccagcttt gcctatctc  
12601 tgtgagccgc agaacagcga taagcctgtc gggataaggc tgtccaccac aaaggatggt  
12661 ttctcaagcg gttcataaag gagcgttctg gcgttgactg tctgtaactt ctgcatggct  
12721 ttctccttt cgggcggtgt cttgttttc gttgcacata ggcgttgacc tccttaaaa  
12781 tagatttact cccacggaaa aaagtgagag tatgtaatgc cgccaatccc acacaataa  
12841 aaaacagatt tcttttcgg gcggtgtcgg tcacggttgg agatatttct tcaatttccg  
12901 cttttacttt ctctttgca atcgcaacag atttctgtat tgccgaagcg gtgcaatgct  
12961 ccatagcggc gatttggtaa aaattgaact catactcgta gtagagcagg aaacgccgc  
13021 tttgatctc tggaaggctc ccaaccgct tatagagcgt ttcattccgt tcttctcaa  
13081 ccatgcgttc atcaaggctc ttaggcacac gcaacgccg tctgtaaagg gtttcgtccc  
13141 atacctcgtt aaactccctg tgccgctcgt ccattagaa aagattcctg ttctgcgct  
13201 ccatctgccg aaactccata aagaactgtt ccgacacttc caactcgtgg gatttgcct  
13261 gcccgctctt aaagctgata aaataccttg tgccgcttc cgtggattcc tcccgaagcg  
13321 tgtatgcctt aaccctgtat gccatctgt tgcctcctg caaaaaatga gtgaggggat  
13381 ttccatccct caccagtag cccgaggat ggcaggctgt ttagaagct ataaaat  
13441 ccgagcttc ttccgagat ggtctaact cgcatagatg gcaccagtcg tcaaatgac  
13501 aagcggggca atctccttg tggaataacc ctgcatttc agcaggacga tttcaaggt  
13561 acgcccgtcc accgtgacta atactgata gagatttctg ctctcaatct ctccagtaa  
13621 ctccgaacc gtaccactt ccgctgccg ctccctgcct gccatgtct caagatattc  
13681 cgcaacgtca ttcgtccatc ggtaaacccg cctgttgaa ttgaagtctg cctgtccg  
13741 catgctatc tctcaatgg tcgttcatc aacgccgac tcacgcagca gcttttctc  
13801 cgctctttc cagatacgc atttctgtc ctccgtccg tggttgatg ccattctac  
13861 ttctccaat cagaattgat tgagaggga gagaaaagcc ccctcatctt ccaaaggaa  
13921 aaaacaaggg ggctgaacgc cttaaattt aatttctat tatcttctt agtttatta  
13981 ggattctggc ttgctgttg ttaacaacgc tctgggtat gcccaacct gccccgact  
14041 cacgctcggg aagtcctca aaaaagattg cctgtatcag ctctgttca ctatccgaca  
14101 gcaaaggcag ggcggcttc agcctgtcca ccatgaccgc attgacaacg gtttctgca  
14161 tgtccaccgc ttcacagtg ataaagtcca gaggattccc ctgctgtcc gtaaatccgt  
14221 cgagagatag cagtctattc tttgatcta attttgcag ataacccac cgttcttctg  
14281 cacggtagaa gtctgtgat tgctcctca cgacttcaag cagacagct tgaatgggga  
14341 taaacagctt gtccatag gtctggtcgg attcctgca acggcagaac tccgttagg  
14401 ataattccac atagccgca ctttctgta tatatactt tcttgggtgca tattcacca  
14461 taaatactc ccatctgaat tttgaaatg taaaaatcc agatggagag gcggagaacg

14521 acaccgcata tcagaaacag ccctacggca cttccaaca aaaatcgaca aaagaaaaac  
14581 cgcaaaggct ctgtgacctt tacggttata ggaaatagta attctattgt atggagattg  
14641 tacttctact ttcaaggatga gaagtaccgt tgactggca gaaatTTTT taactggttt  
14701 cctgccgttc tctgatatgc tatgtattga taaatTTTgc ttcgatgag cagatagata  
14761 actgccgaa aaaaggacat aaaaaaatcc ctcaaattt aaaaacaaat tcagagggta  
14821 attagggta taacaaaata acccaccga atatacgtttt ttttatttgg tgagtttgtt  
14881 cttcaaata cgaacaaaa agagccgatg attcgtgaat tgtccaca tttcatcggc  
14941 tctcgtctt aagcgtctgg ctcttgatg acagtattct tcaagttgtc aacttaac  
15001 aatcttctt gtctgattt tggacaataa aggggataat tctccaaac agtgcctc  
15061 ctaattttat tacgggtttt gctccaca acaggacaca atatccattc gcatttcac  
15121 ataattagtc tcaatcctt tcaaatctca tttatatga ctttgcaag ctgtaagct  
15181 aacttggtga acatagccg aaccttattc atacggctat tcggcggcg gggttggca  
15241 ataaattac caatagctgg ctggtatcct ttaactctg tcaagcagac tccctgcca  
15301 tttgtgaaat aagttaaact gttcctgtat tctgaatac atctagcagg gatttctct  
15361 ttcagaatga cctcgtcatt ctttatctga gtacttaca tatctgcaca ataccttga  
15421 gcatcatgat acgccgtga gagatattcc tgcggtgcat aaatttcaa gtggagatat  
15481 ggctctaata gttctgtccc tgctttttt aaagcctgct ccaatacag aggggaaagc  
15541 agccgaaagt ctgcgggggt acttacagga ctataatac atccatattc aaaacagatt  
15601 ttacagtctg tcactttcca tccatacagc ccctgctgc agccataaag aaccctcc  
15661 ataaccgat tttggaacga ttgatttaa tatccaagt aaactctgct ttcactgc  
15721 actccgctc caataggag cggtctatg gacaaccga cagaagcca gaaaggattt  
15781 ggcgggactt ctatgtgat ggtatattc gctttttaa gcggtcttc catatatata  
15841 acagtagctt cttttattc tgcctccaca tgatatttt cctcaaggat ggcacaaatg  
15901 acttccatct gcacattccc caaaaagaa agtataatct catgcgttgt agtatccaca  
15961 taatatttta aaagagggc gccatctgaa atttcttaa tgccccaag caatatttc  
16021 cgctgtttag atttcttac tgcaatcgtt gtttgagca tagggagagg atttcaata  
16081 aattttctt gcggcaacag catttcgtc ccaaaatac tgttagctg caaacatca  
16141 tttgtaaaa ttacaatc accagagcag gctgtatcgg atgaataa taccggtt  
16201 gtcggaacac acatctctgt gattttatt ttcttttt cagatattt aatacatcc  
16261 ctcaaatgca atgttccgct atatacgc acataaaca aacgccctt tttctgaa  
16321 tattcaatc taaaacctg cccgatagt tcagattgac cttcaggcgt tgatgaata  
16381 aacttactg caatcactc tataagctgc cgaatccca gattgtttt agcacttccg  
16441 tgataaacg gaaataact tccgtttgg aatctctgt tttctctg ttccagttc  
16501 gacatttta acggtttccc tgacataat ttcttaata gttcatcgtt tccataatt  
16561 accgatccc actgttccat atcgtcattg tccgttacc ttatatggg atgctgcca  
16621 acctttgct tcaataat ttccgaagaa agctttgctt tcatttctg atataccatt  
16681 ggcaaatcaa tcccctctg gtcaatttta ttgatgaaaa aaattgtcgg aatcttcat  
16741 gtctgtagt catgaaacag tatacgggtc tgtgcctgta tgccatcctt tcagaaact  
16801 aataactg ctccgtctaa tacggataa gaacgtata cttccgcaa aaaatccata  
16861 tggcctggcg tatctaat gttgacttt acatctccc actgaaaaga tgcactgtc  
16921 gtctggatg tgattcccct ttgacgtcc aaattcattg tatctgtcct tgtgtgcct  
16981 ttatctacg tccctggtc tgcaattgca cactggtat acaataaact ctccgtta  
17041 gttgtcttc ctgcgtcaac gtgagccaga atgctaagt taattttt catgtgatt  
17101 tcctctatc aacacccaa aaagggcata aaaatacca gtgataaata ctctatcac

17161 tgggtaaata actccaatag ccccaaaaca cttatatggt ttcgggcata taaaattaca  
17221 tgataaaagt attcttaaac tgggtacaaa aaactaagcc ccatattaa agtgaaacgg  
17281 gactgctact tttgttccc actatcaaat tgacagtta ttaagaata ccttgccgca  
17341 tattattaa ctcctgtat aactgaat ctaattatac tccttaacc tttattgtc  
17401 aagctgacaa actaaagcag aaaaagcggc aggatttccc cctgccacta atcatctgtt  
17461 tatgcaaaaa taatttcctt ttccacaatc tcctcgcac aagcccttat gttattgagg  
17521 catcctgtcc attctaaggc gtttctgcc ttagctgtt ccggtatgcc ctgtgcctgt  
17581 tcataccct ctatgagcct tcaaacgct tcctgtgcct gtctgtgat gtcggcaagg  
17641 taggcgtta gcctgccgt tgtaagaaga ttggtgatg taactttac gtactgttt  
17701 agataatcta aatgccgtt cccagatg cctattgcct gttcttctc ggcgggtaca  
17761 gtaagcacg gtatcaaata atcccctgc cttcgtatt tgccgccag ttctcaaat  
17821 aatgatttg ccattgtctg ttacctccac attcttttt atttgaatg tccgcaaat  
17881 ccgtctaca tcaatcggat ttgatggcag attccaatgc acaattctc ggcaataat  
17941 gtggaaatcc aatccttct gtctatgga agtagatgct aaaacaatg gtctaatgg  
18001 agaattgaaa gaatttctaa cgctctttt tctgtctgcg tccttttct ttcatctcc  
18061 ttagtaaag gcaactgcaa agtgagaacg aatagcagtt ggttttctc ttgtccatt  
18121 tgctctgcc taaacgcat tgaatgtat aatagtgtat attgtggtc tcacatccat  
18181 agaactgct attgtatag taaattatc aacaaatta ttgtctcgt ctaaaccgtt  
18241 tgtaattaa tgagcatatt catcaaacat agcctgaatg tttccctgct tgcaatagg  
18301 aagcagatt tccaatgtg cgtcctcgt tttttacca caagcaagct cgactgtggc  
18361 tgtagactc gctgtattca tacggttat aaagatttt gcaatctgac ttggcaata  
18421 acttgaaaa gtagttcctc gttgcagta agattgatag gttctgtta tagttattgc  
18481 aggagaagct attgccat ctgcaagaac atctaacaaa tcatcaggt tttccaag  
18541 cgtacaaatc tttccgtag ttgtttcaa atacaactcc cgtaatgtct gaagatgggt  
18601 taaaaatccc tttgtcgtc tggatttctc ttcttctca tcaaacgaag caagagctc  
18661 accactattc agccaagtg taacatatcc cgcaccgtcc aataacagag gtgcaagata  
18721 ataccatcgt ttatcctcgt tcccgatgt cggagcagta tattatcta atttctcagc  
18781 aatcttgcca agactatga gagagccaag aagaaaaaac tccaataat caacttagga  
18841 gtaaaagagg atgggaaag aaagatgat atcagtaat cgtttgacc gaccgacgct  
18901 tgaacaaatt gaagaagaaa tgaaaaaaga gaattacgat gataacgaaa acttgatgct  
18961 agcagaagaa tttctgatt tttgcagaa gaacagaagg actgtccca acgaaaagcg  
19021 ttagtcaat aaagaaaaat ttatatggc agtccgtgag ttatcagaaa cctatgaaat  
19081 tgacgcagat ttaagagaaa gcatgacgg atataccgca tctcttata tgaactatg  
19141 ttcatataat ggatatata agaaactgct gggacttatt tttatcctgt ccgacgact  
19201 ttctatgtc aaagcaaaag ataatataga cagcgattg ttgatgtgt ttacttatca  
19261 cagcacaat gtctatctga aagatagaga aataactgat tttgaataat gtacttgatg  
19321 gctactcaaa cgagcagcca tctttttta atatgccgga ataccgtatc cgtagataac  
19381 tgagctacca accgtgatg tttggttct gcaagtgtc cctgagttgc cctcaacggt  
19441 atagactgta ccgttctgc atttctgaac gataccggtg tggctgtca caccgtcgc  
19501 ctccagtc aagaagatga ttgtaccggg cgaaggttca tacgaaccgt ctgccattg  
19561 tcctcgtct ctaaacatt gaacccgtt tacacagccg gcatactcga gaataatcc  
19621 ggcgtcgata tatccgact cgttggcaca ccaagaaacg aagcaggcac accactctac  
19681 acgggagtc aatccgtacc aagaccagta aggctgaccg cctacattac ctactgaga  
19741 cagagcaacc gttacgatt ggtcgtcgt gtatccgata ccgtaaagca cctgagacca

19801 tagttgattg ttttcgtcct ttagcagctc ggcaagatac tctttctgct cctgattaa  
19861 gccgtacata gccgccattt catcaacggg cttgtgcat accgtgat acaggaaagt  
19921 ttctgttact gtggtttcgg tctgtacgat gttgccgtgt ccgtcgtcgc ttttctgat  
19981 ttcgggtggtg gttttcgatt ccgttctgga agaaatatcg tcatctccc aaaaaatc  
20041 cgacagtagc tgtttcttg tttcatcaac cgtagcaacc tccatcggat tatcggggtc  
20101 ggtatttact ttaacggaat agaccgcaag aacttcttc cacacagctc ggcttccgct  
20161 catttcaagc acatcatagc ttacggagtt ctttctctgc tccaatcggg catcatattc  
20221 ttgattgatt tctgaacga ctgtctgcat agacattccc gtgccggaat cctctcctga  
20281 aaagaagata ccaaacacag aaccgacaat taatccgaca agacacagaa caataaac  
20341 caccaccgca acccagccgc cggcagcaat ggcggcaaca agaccttta ccgccgaat  
20401 gattgctttt actgcggcaa cggtggtttt ggctcggct ttaatcgtag cggcagttgc  
20461 tttggctgtg gcttttgcg cctgtgccgc tttctgcgaa gccttaactg tcgcctgagc  
20521 tgttttctgt gccgctttg ccgcttctg actggtttt atcgcagtct ttgcagtctg  
20581 ctacagcgtc ttaaccgatt tctgtcggg cttgttgct tctttccgg caaactaat  
20641 ggttttctt ccggaggaag tggcagactg cttatggtc tttccgcct tatcgacagt  
20701 cttaatcgca gagcttgtgt tttgcgaagc ctgtttctc aaagactgct cggctcgtg  
20761 ctgcttgaag cgctgaatac cgtcctttg ggtgccgata ttctctttg tggttcaag  
20821 tcctttctg cccgctttg caaacgata agcaccatc tgaaccact cgtcaatac  
20881 gctttcagt ttatcggag catattcctc ggcagaactg ctgttgcat ttaccgaccg  
20941 ctccgcttt tctttgtg cgatatacgc ctgctcatt cgttggttg caacggcagc  
21001 cttatctatg gttctatc tacccttgc attgtcctc gtttaatat cagacataca  
21061 atccctcct cctatgcagg ctgaaccacc cgttgcgta ttcgttaag agcttcgcca  
21121 ctacaacaag tctgccgtt gtccgggaat actcacaggt ggaaagggtc aggagcttg  
21181 cgccgtattc ggcggttac cccgtatcgt aaagcgacag ttccttacac ctctcaacat  
21241 aggctgtgaa atcatcggcg gtctccgat tgacgaactg ataataattg aagctgtcgg  
21301 gactatccgt atataccag gttttgaaca cggcaattac tcataggtc tgtctgtcgg  
21361 tcagcgtatc aaaggatact gtttgtgct tttccaaaa gctctgtcc tgaattca  
21421 taagaccggc gaacatagag ccgtcgtta tatgatgacc gtagataatg atattgtcgc  
21481 ttggcagttc catatcgag ttttctgaa cataaggaca gccgtagtcg gtgtatgcct  
21541 tatcaaagcc gtgctcaga tagaagttcg ggttatcct tgactgcata acgggataat  
21601 tgattttgt gtctcaacc ttaatccagc cgaccatc gttatttgc aaataaagct  
21661 cctgatactc cgggataaaa gcttttctt cggagtagtt catcggctct tgggtttctt  
21721 caggctcggc ctccacaacc tcaatcagat tctcgtacat ctccgctgc cttgcagagt  
21781 cgtaatagt cttgatgaga aaacctgaac tgacggcaaa tacaatgctg aaagcacaga  
21841 ttatggcaat atagatttg ttttcatag gtgttctt tctcattac agaatagggc  
21901 aagggttata caccctgcc cggtttggt gtcacagct tatacagctt cgtattctc  
21961 gggaacttgt ttgcaaacgg cacaagcgaa ctgccgacct taatcagtc gtgtctcgcg  
22021 tcaacattcg tgatatatga aagctggagg tcggaaatgt taaggagctt ggcaagctca  
22081 attctgtcgg ttgatcctg attgagcata atcaaaaact cgctgtttgc aagcatagtt  
22141 cttgccgtat ggctctgcaa aaggtcgtcc acattctgcg taatgccggt ggcgtaagca  
22201 ccgtactttc tcacagctt ccaaagagta aacaggaagt ttgcggagta ttcgtctgg  
22261 aacagaagat agatttcatc aatgaagat aatgtctgct tacccttagc acggttctgt  
22321 gtaatacggg tcagaataga gtcaggagc acaagcatac cgataggcat aagctgcttg  
22381 ccgaggtaaa gaatgtcata acagataagt cggttatcc tatcaacatt ggttggcttt



22441 gcaaaggat tcaaagaacc gtgagtaaac agctcaatag caagggcgat ttccttggc  
22501 tccggctcgt cctgtttcaa aagctccgca gaaaaatcct gcaaggtagg aacagtaccg  
22561 gtatatctc tctgctgata gtctcgtaa acacttgccg tacaacggc gatgatagat  
22621 ttctgcttg tccgagggt tgtaccgcc atgagctgt cgagaggga cataatgaac  
22681 tcggatttca ggataaccgg gttgcaccg tcaccgtatt ccttgttcat atccatcgca  
22741 ttgatatggc tcggcgaagt ggcggaaata ttgatgattt cgccaccgag agcctttaca  
22801 agctgcgaat actctcgtc agggtcgatg ataataacat ctgcattgga ggaaagaatg  
22861 atgttttcaa tcttccctt tggcgaag gattaccgc cgccggatac gccgagaata  
22921 aaagagttgc cggtgagtag ctgtctcgg tcggcgataa tcatatctt actgatgaca  
22981 ttctgaccg agtaaatgcc gtttctggt taaatgtct gaaccctgaa gggaataaag  
23041 accgcaaggc tttctgtgt aagggtctg aatgcgtcaa tctgctgt tccaaaggc  
23101 atagccgat tcagtcctc catctgctga tattgagaa cggcaactg gcacaaatgc  
23161 tttctgccg tagtaagcag agcttcggtg tcgttatcaa gctgttctt ggagtccgca  
23221 gtatgaacca tagtgagtac agcgaacatc attcgtgat cagagtggt aaggtcatca  
23281 aggaactcct tcatttctt tttctgctg tccatatcat acggaacgg agcggaaaag  
23341 ttattgttct gattctgctt tctctgccg ttggttat tctctcaac ccaagcagt  
23401 ctgctctctg cttctgcac cgcttcatc gtcggaacgg gtacaatgtc aatagacatc  
23461 atcaggttc gggtcaggc ggtaagctc gctaccatac tctcctgat ataggaagc  
23521 tactcacgaa gaaaaaggc tctccgtaa cggttctta tttgaagta gtcctttca  
23581 agttccattg tatccggca aacataatc ttgaaatcgt gtcctttt tctcgttcc  
23641 ttaatttga agtggtatgc ggttctca ccgacacgga agaatcgtg gacaattctc  
23701 agcctctcat cgtttcaag ctccacacat ttgcttccga gtctgcaaa gtgggcaatc  
23761 aggtcagcac cgacacggc aaaataggtt ctgctcct ccacgctctt tttgtgatg  
23821 gagatagtaa catactatc ctgaacgatt gcattgac cggtcgcct gtcgagaagc  
23881 atttgttat attcctctg gtaaacatca agctcatgc cggttcggg gataagaatg  
23941 gtttttcaa agtccaaac gtaagccgt ctgttgtga tagtcagtt ttagtagct  
24001 ccgctgca gagagttgag aagctcggag tattcaagga acattgctt cttgtctca  
24061 cggctgcta cggcaaagt aatccgtg aactgaagc tcttgaata cttgtcctg  
24121 cccacacgga aatgccgtc gcataaata gcggtgatgg gaatacaatc ctgtacgcc  
24181 ttggacta caactttt tttgtctgc ttaacaggt ttgtaagggt ttaatcatt  
24241 gttctataa gcctcctt gttttgtt gattgtcgtt tcatcaatt chtaaggt  
24301 gttgtggaa tgaatacca gcttttcgg cataaggaac tcggactta tccagccca  
24361 tataaattc tcagccgtc ttccgttga ttcacaaag ccgagagccg caaaagggc  
24421 agtcccaaa atgcacacc acgatacgg tctgttcc aggtacggt ttaggaggaa  
24481 gtaagtct accgctacc cacaggcgag gacagaaaa atgaactgtc tgagcgacag  
24541 tcaaaaaac atgactctg tataatttcg tatctcgg ttaatttga cttcatcaa  
24601 aagctctt ctctcgata tgctgttt gcgtgacgga tttcatcaga gcagacgcg  
24661 gtgtccgaa ggcaaatcac atgcccgtt tcttctc cgtaatacac acaatattg  
24721 cagtcgagt cggcaggc atagccctc catctatct tattattct gttttctc  
24781 atcagagaac ctcccgtt aagccatca tttcaggat aattcggctc ctatctaa  
24841 ccgaccgac aagcacaagc atattgaata ccagttgcc gatatatgcc catacctgag  
24901 taacggctg tgcgtcagg ttactaccg gcggcgtaga agcaaatagg gagaagatga  
24961 tacaagcaag tacaattact gtcctcaa gcaaacggc acagtagctc ttataaagc  
25021 tcttaccac attctgcac gtttccgg caaatgtga aagcgtatc ggagcgagag

25081 cagtgatcat atacagcttg aaaaatcgct cgtacaccgt cattatcata atgaacgaca  
25141 agaccgtgat aaacagtccg ccgataagag taaccgccca caatgggata ttttcaaaaa  
25201 atccgcagct tcaatgggtt gttaccattt cagcaggtaa agttgtttga ttgggcgtac  
25261 cgaatccgc agatgtcata atggttgaaa tcgtaccttg tacgatgtcg aacagggcaa  
25321 gcataagctc cagcccgtag gtaatcacac ctttggcaat ggcaaagcgg ataacagct  
25381 ttaatgcgtg ttccggttc ttacatcgg taaaacttc gcaggtgcga accacaccga  
25441 caaaaaaaaa cagaacaagc agggcaagac cgatagcctg aactgctccg ttgatattca  
25501 ccattaccga ccaataactg ccgcctttga actgttgagg cgaagtgggt agcaactgcc  
25561 atatttccga aagcttgctg ttccaagttt caagggcatt ttcgaggttc tgaactacc  
25621 agttatcact catctgtttg cacctccttt aagattaggg gcatactga aatgccaggt  
25681 atgccccgtt tgataactgt gttctcttaa ccgtaataa gggtaaggat ttcctttgca  
25741 aaggtaatga tgataccgcc tgcaagagtc aggaaccgt tggctctctg agacgggtcg  
25801 tgagacttca aagagagacc gacctgaacg ataccgaagc caagcaggat aagaccgatg  
25861 gcacggataa gaccgaagat gaaatcggac agattgttga ctacggtaat cgggtcgtcg  
25921 gcggcaaaag cggtaacgct cataccgcaa acaagagttg ctgctgcgat tacggcgag  
25981 taagcacgga agcctttctg aacctttccg gtcataaggca gcttctgagt agtttcttt  
26041 tcgtgttct tcttaaaaaat gttcattgtg tttcctccg ttaaataag tttttattca  
26101 cttcaaatc ctcatcggac agaagttcgt aattggtttc tccgtagctt tctcggaa  
26161 gttcttccgg gtcaatagaa agaacggaaa ttgatgagtg cttgatggtc acttcgccgt  
26221 gtttatatgc agaagcctt ccatcgggtg taagtgcac attcgggtgc ttcaagatg  
26281 cgtacttgaa gtccataacg gggcgttctc cacgaataaa cagaattgca tattggttat  
26341 caagcatcag aacctatca ggagtaagaa gctctcgacc gctaactga taatttgg  
26401 agtagttgcc gcttcgacc gtacttttc cgaaagtgtt ggtatcaatg gttccttg  
26461 cgagaagctc ggacacatat ttgtgggtgc ttgctcgtt gccgccgaga tataaaaact  
26521 cgtcgagtt acctacaatg ctttccatt gctttcaaa caaggctta agctgtgcca  
26581 agttctgcaa gataatactt accgataccc cacgggaacg cataaccgaa agaatttgt  
26641 cgaagtcatc agggagtga acattcgcaa actcgtccat caaaaaatga acgggaacgg  
26701 gaagcgagcc gccgtgaata tggcggcag cataaaacaa ctgctgaaaa agctgtgtg  
26761 aaaggataga taccaagaag ttaaagctgg aatcgttatc cggtatcaaa gcgaacagag  
26821 cgacctttt ctctccgagt gacgggaggt caagctcgtc tgtgggtggt aaagaagcaa  
26881 gactttcaag gttgaactt tccagtctg ccgcaagggt tatctgtatg gactttaagg  
26941 ttttcgccg acctgaatga taggaacggt aatacttcaa agcaatgtgg tcgggattcg  
27001 acatctcaa ttcgcaaac agttcatcaa gaggagaagg tcttgtgtcc tctcgtct  
27061 caatcgacc ggctcgagc atttccatta tcattgcaa gttctgttca tctcgggtg  
27121 cttcataatg aagataaaa acaagtgcaa gcaaaagcat tgaagccgag gtatcccaaa  
27181 aggggtcttg tgattgactt ctttcggag tggactctt aaaaaggtc gtcacgagct  
27241 ttgacatc gttgtcattc tgcaaataga caaacgggt atagcaatgg cttttctca  
27301 ttgaaatcaa atcgagaaca cggacttcat agccttctg ttcaagcagc tttccggtat  
27361 ctgggagaat ttcgccctt gggtaagaa tgacaaatga tgtgttcac tgcaaatg  
27421 tcggcttgca gtaaacctt gtctaccgg ctcccgaacc gccgcacaca aggggtgtta  
27481 agtttctcg gttttctc gattgagtc cgatacagac attttcgctc atcagcttat  
27541 ttgcagaagc cgagactgt ctgtatttt tgtttacggc tcttcattg cccattttg  
27601 cagaaccgtg ttctcagc cttcggtaat tcttctgtg tgagaagtaa atccaatac  
27661 ccattgcata gcagagaagc aaaacgagga cagtttttag gctgtcctcg catagctcaa

27721 tatgaaatgg ttcgttgaac gctgttaata ggctcggcag tatttccggc aatcctcctt  
27781 ttacagaggg tgcaatcaga agtgccagcc atacgaccgg gataataccg atgacggaaa  
27841 gaataatagc agactgcctc tcgttatctc gattcacagg agcgttcctt ttcgataact  
27901 ttgaactttt tctttggggc agttccgacc ttgatgataa ggtcgtccac cgcatcggta  
27961 gatttggcct cgttcatcaa atctgtttc tcgtcgttga gagaacggat aataatgccg  
28021 tgttcataat cgtccaatgc gatatgatac atttcttctc tcgcatagt ctcaccttat  
28081 ctttcgtagt ctttgcttcg ttctgctttt tcttgtaaa gctcatcgga aacacgggag  
28141 tgaatatccg ccattgcgtt tctcgtttg gaaagctcat agcgaatgtc cttcggctct  
28201 ttgccggcga gcttttcagg gatacggttg atagcaaat tctgtgtatc gacgccgtac  
28261 tttttgcaaa gcatatagcc gatacact gctgaaagc ccatatccgc tctgtgtaa  
28321 ctgtcgtgt tgatagagag ctgtcgtgg ccaagctct gtgctacgca ctgagcgacc  
28381 gctacgctgt ctccacatc acgctttaca tacaaggtct gttcctcgtt gttataaac  
28441 gccccatat tgggatacgg aagctcattt gttgcttcca cttcaaccgg ggaagaatcc  
28501 agcataacgg taatgagtgc tttcgggtca cggttgacag tcggtgcagg cggcttttg  
28561 ccgttggctc gcgaaacatc aaagacctt ttacattgt aggaaatgcc ggtcgtaccg  
28621 tctttcttg catactgac aggttcaaga atggaaatgc ttttcgacc tttctgaatt  
28681 ttacattat ctttctcca gcatcaaag ttttaagct ggcttgctc gggaagctgc  
28741 ttgaaatca gaagtgcgtt gaccgcagag tatctgtcaa gacggctctg cgtatcaagg  
28801 aaggcttga acttttccg gtcgaaaca atcgccttg cgggtcgc ccgatctga  
28861 tatacggctt cttttcagc cttcatctc tcggcatatt cctcttgga aagtcgttg  
28921 ctctgctgc tcgcttagc aggggtaaaa ttgtttgtca ttgtgattac ctcttttca  
28981 catttttct ttaggtttc ggctgctggt gtacggtctg tgccggggcg ttttgactt  
29041 ccggcttga tacctccggc tctttcggtt ctgctcttt ctgctgcttg gactgtgctt  
29101 tatacggtc aagctttgct tttaccgacg gctttctctg tctgtcgtt acagtacct  
29161 tatcagttg catatctacc ggctcggagt cgtgccttga cggagggttt ttgtccgtt  
29221 tggcgactgt ggggtttgac tgggaatacc cctctttctg aataggtttt ctgacggctt  
29281 cctcagtgat gatttcgtt ttggtttcgc tcggcttgc ttttccaaa gttcacgct  
29341 tttcgacagc ctctgagac tcggtgacaa tcgcagcctt atcaacttta ccgagttcaa  
29401 atctctaac gattctctga attttgaag cgtcctctgc acgggcaata atatcaatcg  
29461 ggacattatc gccctttgtg ttttatccc tgagtacgca gtagagaacg ccgtagcgtt  
29521 ttgctgctc ggtaaactc ttcaagctt tgttggggat agaaaacacc ttcagctcct  
29581 tgcccgactt aatcatatta gtaagtcgag ccttgccttt tgttttctgt tctgtttga  
29641 gaacagagac taaaagaacg gcaatattct ttgctgccg tccgcttaat tttcgggcta  
29701 cttcaaagcc ttcaagcga agcctgacga cctgttctgc cgcatcacct ccgtttgtca  
29761 ttacggttct gctccttcg tcttgtttt tcttcgtaaa ctctaccgt ttcaaggtg  
29821 gttcaataa ctttgacct ttcggctatg tcatcaaaa gaccgacctt ttgctggaga  
29881 gtccacagct tgctcgtgat tgccgtaatc tgctcttga catttgatag ctcacgtca  
29941 ctcaaattc ttcttaactg ttttcgagg tgcgttctat cgtcagtcaa ggatttgatt  
30001 tgcgacaaca cggactctt atatgagaaa agctgctcgt cggtagaat gtttcccgt  
30061 ccaagcagcc ttgtctcctg agtgattttg tcgagcttca gcaaatctt tttcaaaga  
30121 tagtgaagcc ttgcggtatt ctgtttttg tacttcggca gataaccag cttatagcag  
30181 taatgcagat acagccata cagtccgccg accttttga ctttgtgtc tcttggggc  
30241 attcgtact gcctgactct taccgtttc tttgcaaaag gaacgataag aacctttga  
30301 ttttccgtca gcctacgctt gattgcgtc tcggataat tcttccgag tgatttaagt

30361 cgtatcggct tcttgatcc ttcgggaca atcgtccaat actttcgact gtcgctgaga  
30421 caatgttcat agcccatctg agtcaggata taatcaaagg tctttaagtt ggtgctgtgt  
30481 gcaatcgctt catcaatggc gtcacgggtc attgaatc ggctcggcat accggcttgt  
30541 tcctgcttgt agtaataaga ggattgctta ctgcggttg ggctcggatt gtaatacagt  
30601 ccgtactttt cacaaaggca gtcggcaacc aaacgaaact tgaaccacgc ttttcgctc  
30661 ccccataacc gcttgccgct cacaaaggaa acggagtta ttacataatg acagtgcagg  
30721 tgtttcgtgt tcagatgagt agtaaccacc acctgaaatc tttgcccc cacttcgttt  
30781 gcaaattcca ttccgattt ctgtgcaagc tccggggata tgcctgttc cttaaagctc  
30841 aggtatccgt gataggctt aatgccgctg tctttgccgt atgcttttt tacagatata  
30901 aactggtctc ttgcggtcgc agggttgcag ttgataacct ctacgaaaaa ctacgctc  
30961 gtttttctt cgtccttgc atagctgaga acatcacgga gagcctgata ctgttctc  
31021 gtgtaaagt ctgccgctt ctttcggga ttggcggcat agtcgattac ctgaccgagc  
31081 ctgatgtga ccgaccacaa tttacttact gccatttcat atcgtctta tcgggtctta  
31141 aaaaagtac ctccacatca gcctgaaact tgtgccaacg ctccgctcc ttttgagct  
31201 gcggtgctc cacaaatccg aggggtgttg ctttcgccg aagctgattg atgtgtgtc  
31261 cgatagcgg aagctcacgc ataacatcgt aaaatcttt atcgggctt tctctcggct  
31321 cgtatcctc gagaagcaaa cggataagtc gccttcgga aagacacgcc cgcttgcct  
31381 tttctgcaa atcctgagct tctgcctgt tcatcagaat gtgctttca atgttctc  
31441 tgctcattt tatcgtgtc tttctgtaa atagtgct tgcctcgtt tatctgaaac  
31501 aggcacattg ttgtactcc gaaaaagcc cgatgagta acccgccgc gaccaatac  
31561 atctcccgca aagcttatg tctttctt ctgggggtat taggggcaac ccctaacgag  
31621 tgtaccgtt tggacattc tgtcataaa tggctgtc gctaagatta tgcagacact  
31681 ctgggtgcc ccatagatt actcttatc ctccatatc tttgagacag gcttatacgg  
31741 cttgcttca ataccgtca aggactata aaatctctc gggatattga actttcctc  
31801 gtactacga gccagttct tcggcact gagaaactt tccgactcaa tcggtgcgta  
31861 cgcaatgaaa aactgccc caataatgc gagcattca cggttgctgt cgtctttac  
31921 ataacattt tcaatctcc agccgtcct gccccgctg tcatcagca tatacgctc  
31981 cagtcgaca ctttatcc accgtcaag ggaagaagca tagatagaat atccgccat  
32041 accctaatg aaagcctt tgttactgct gacaacatag gttcttgtt cctctgtga  
32101 aggcctgtca aagctgtcag ccgtaaaaac aatatatcc gtcgtgtgtt tctttctt  
32161 ttctgcctc cggaaatg cttcaactg cggataact atctcaacat tctcaggctc  
32221 ggaataaact gccctgtca gggcaagcc gttcatctt cttcatcgt tgcagatgat  
32281 ggcaacctc tcctcaaagg gcatatatt tcaatatc cctccaca gagactgcat  
32341 tgctccagc gatacctca tttcaatgag cttcgatac ctgcccggct caacaagaat  
32401 tacggaaatc tttcaggtg cttcgacct ttcaaaggta tctcgtaaa tattcaaggc  
32461 gagggagct ccgtttccc aactcatatg aatctgtcc gcgtcgtca caacttaac  
32521 cgttctttc agaccgatg gcattgctt ttcgagcc atttcagtga gtacaatctg  
32581 cgtaccctc gggtacatt ctctgattc ttttagttc atcgtgcaa actccttcg  
32641 gttttatct ttatccctaa gcgtttcaa agaaaatcgt tgacatctt cccgtattg  
32701 ggagggtcgt caacgactc atacttatc gagagaatag tctgcaacgc tttgtagct  
32761 tttctcgg caatatcatt gtccaaatga agaacaatt gcctgattg tttgtctt  
32821 tcaagtagc tgccgagtgt aacaggcact ttcgagctc cgattttctg cttgggggag  
32881 tacactccc caagagaaat aaggtaagc tgcgccagt cttgcccctc cagcttcatc  
32941 aaagttgcat aggaaagcag gtcaatggca cactcaaaaa gatgaactc tccggtgtt

33001 tcggcagtca gacgaaaaga atattgcttt ttactgccag tgacgtcgcc cataatcctt  
33061 gattgatttg ttgctctgta agcggcgtat ttaggttctt tgttctcgtc atagccgata  
33121 aaaacagcat tggatacgg aagcgactca atgattagct cctgttccaa gcagtagttg  
33181 atgatttcaa aatcaatgcc acgcccgaaa aggtaataca ataccacatc ggcagtagga  
33241 ctttttcag gcagaagcaa gggttgttcc tcatagcttt tgatgtttc acaagtcgga  
33301 aagctgactg aaccgtttcc cataatggtc tgaaccgct ccacaaaatc cattccacgg  
33361 actttgataa ggtaatcgag agcggatttg cccccgatac ctctcgacca ccacatccat  
33421 ttgccgttgg aatcttcaa gctgtcgtgg gttcttggg tgtaggtgtt gcttgaaaat  
33481 ttaacaagct cgcccgttc atactctctg agataggta ataagtccat tcgtttggct  
33541 tcggttatga cttccggtgc aatatacggc atacaaacca cctcgttta ctcaaggcaa  
33601 tcaaattcct taccattat ctcatcgcaa caagcgagtc ttgcaagcaa taacagaaca  
33661 tcgcaacag gacactttat gtcgttccag aaaagccaag cgacttctgc aaggctttc  
33721 tcctcataaa gagcaacgat ttctcaggg gagaactcgg tctgaatact tctgtcaata  
33781 agttctttat agaaattgag ctttgaatt ttaagtgaat attctgtttc cctgcggggc  
33841 ggtgtgcttc ttttaattc gtgatacga ttgctcaatc tacggacaac gcacatctgc  
33901 ggtgcatcaa acggttcgat ttcttcattg gcaaaaaaga aatttcctt aaaatctgtt  
33961 tctttctat tatctttcat aggttttctc tttcgtgtg ttcggcactt cgccctcatc  
34021 gggttcggc cgcacaattt cgttatctcg tttatccata ttgagcaaga tattcagctc  
34081 gtccagtcgg gcaagctttg tttcaattc ttctcttgg ataatggtt tttggacttc  
34141 tttcttgcg gttccaact gatttttgg gttctcaagg tcattttccg caagcgataa  
34201 gctctcggca aatctctcaa ttccgttatc gaggcggata atattgccgt atgcgtcatc  
34261 gccgagagga acatttctg ttgttcacc ttctcagcga acctcataat ttcgtctgc  
34321 ggtattaaaa agcagctccg tttcaaaccc tctgtacttg ccgagaggaa tagggtcggg  
34381 gctgttcatc tgcttcagg cttcaatgat tgctttaccg gcgtcggctt tttcgaata  
34441 aaaaacacc ttaacctca taccgacaaa gcggtcgtcc gttggtttcg ggtgctgtt  
34501 cgagtttct acatcttct tcaagcctc aatgcgggtt tccaaagctg taattctctg  
34561 cggataatat ttgattatct tatcttcaa agcgtatctt tcagagagaa agttggattt  
34621 taagagcttc agcttttga cttgaatgtc caaatccatc ttctcctaa tatacgggtt  
34681 gccggtggca agcatttaa tctctgcata ggacagagcg gtttcatcaa tatctcggc  
34741 agaacgcacc ggggatttgc tcgtcataat ctgactggcg aacttttgc ttccctctac  
34801 aagctgatag agatagcgt cgaaggtctg ctctgttaca tagcggtaaa tatctacatc  
34861 ggggtttgag ttaccctgac ggataattcg accggaacgc tgctccaagt ctgacggtct  
34921 ccacgggcaa tccacatcgt gaagtgcgat aagtctgtcc tgaacattcg tgccggctcc  
34981 catcttctgc gtagagccga gaagcactct gacctcgcc ttgcgggtct tttggaacag  
35041 ttctttctc tccacatcgg tatctgctc gtggataaag cggacttcgc ttcggggac  
35101 accacgtct atgagtttct ttctgatgtc gttatatacc gagaatgtgc cgtcgttctt  
35161 tgggtttgag aggtcgcaga acacaagctg tgccgattt ttatcggctg tttctccca  
35221 aatacgttag atgttatcga cgcaggcgtt gattttactg cctcaaaaat caggcagcat  
35281 atcgttgagc atacgtggt caagagccaa ctttctaccg tcgttttga tttgagcat  
35341 attatctaca ctgaatcta caccgccgc accgactttc tcggctcgtc ccgcaaggga  
35401 agcaaccatc tctttctgca tttccgaagg cttgaccgca acattgtgga agtgtcatc  
35461 cggcacaggc agctccagca tatccgctt cttaatgtcg gcgacctct taaacatcgc  
35521 cataagctcc ggaaggttat agaattttgc aaagcgggtt ttcgtctgt aaccgttcc  
35581 ctccgggta agctcaacgg ctgttacagt ctctcaaag gtacttgccc acgagtcgaa

35641 gtgttgcaag ttgttttta caagcgtgtt atactgcaag tatcgctgaa tggatatagag  
35701 ttccaccata ctgtttgaga taggagtacc ggtcgcaaat accgttcctc gaccgcctgt  
35761 aagctcgtca aggtatcggc acttcataaa caggctggag gattttctgtg cttctgtctg  
35821 agcgataccg cccacattac gcatthtggg gtaaagatag aggttcttgt aataatgact  
35881 ctctcaata aagagcctgt ccacaccgag ttcttcaaag gtaacaacat cgtcctttcg  
35941 gctttggctg ttgagctttt ccagctttg cttcacggac ttttagact tttcaagctg  
36001 cttaatggag aaatthtctc cacggtttcg cttcaaatcc ataataccgt ctgtcagttc  
36061 ttcaagctgc tgctcaagaa ttgccctctg tcttcaatg gacatcggga ttttctcaa  
36121 ctgagaatga ccgataatta ctgcgtcata atctcccga gcaattcgac cgcagaactt  
36181 ttgctggctt tctgtctga aatctcgtt tgctgccaca agaatactc ctgccggata  
36241 tagctgcaag aattcagccg cccattgtt ggtaagtgg ttcgggacta cgaacagcga  
36301 cttattgcaa agtcccagtc gtttgactc catagcggcg gctaccattt caaaggtctt  
36361 accgcaccg actgcgtgtg ccaacagcgt atggcaccg tacagaatgt gtgcaaccg  
36421 atthtctga ttttacgga gttcatttc tgggttcata ccgttgaaa caatgtggct  
36481 tccgtcgtac tcacggggct ttatgtgtt gaactthtctg ttatacatct ttgtgagttt  
36541 ttctcggcgg gtagggctag cccatatcca gtcctgaaag cctgtctta tgagttcctg  
36601 ctttgcctgt gcgattgccc tctctthtctt attgagaac gctthtctc tgccttctc  
36661 atcttcgata tagtcaaaga ttcggacatc tttcaggtt agtgttctt caattatctt  
36721 atatgcgtg atgcgggaag taccgtatgt gctgtacgt tttacattgg aacggctgta  
36781 gctctthtccc tcaatgttcc attcgccgtt aaactgagag tagtgaacct tgatattcca  
36841 ttgtcatag cgtgggggtg cgagaaactc aacataaac tgttgaata tttcggcgg  
36901 tatccaagtc gcaccgagcc ttacggaaat ctgcttgcc gtaaatcct ttgctgcac  
36961 cthtcaagt gcctgcacat tgacgggtg atcttcggga tacagtgcc cagacttht  
37021 ggctgtcgc agcttctcag gaacattgcc cgacagatat tctctgcca tcagatactt  
37081 cggctcatag gaattaccgt actcataaag gggatttaag aagattacac cthttaagtc  
37141 agcgaataat tctctctcag ttttccgga caactcctc atatactcca tatcaatggc  
37201 tgcctthtctg cccatagaga cagcgagagc ctctctgctg gtgtcaacct ccgttaccg  
37261 cttgtcgggt ttaatctgcc tttgaagaa catatccgcc ttgcgttcca gttcggcatc  
37321 ttattgata acctcaagag cggagagcag agcataggag ctgtcgtcgg aaaaggcaga  
37381 agtattggca cggctgttaa ttagtccgta cttctttgta aagctgtcat acagtgtgtt  
37441 cagcttatcc tgtcctgtt tgatttctg gctccgggta tctcgggtt gcagttcaat  
37501 caagttacgg acgcaatccc ttatccaat cataccttg atacggttct cggcgggtgc  
37561 cgatacctct accggagaca tacgggagtt ctacaggaaa tagatttht cgtccaaaac  
37621 cgtgtaagag aagttcctta ccgtagggct tgcgggata gaattatctt cttctccag  
37681 ctctcggca acctcgtatt cggagattt tccgtgaatg tttgagactg cttcgttcaa  
37741 aagctccgaa aggtcggcat tttcaaacgg ctacaggtt gcttccgctc cgaaacgacc  
37801 gcttaccatt ttatttctc cgagtatcat ttcgggtgc tgaacaaaat atgagttcat  
37861 cttataccg ttttctcgg tgtcaagatg aaccagtc ggctcaatat ctattagcct  
37921 gtctcgtt tgcataaaca gaatatcggga tacaacctt gttccggcat tgccttgaa  
37981 agtgcattc ggaagtctga ttgtccgag cagctccgc ctctgtcga tatatttctg  
38041 gacattggag tttccttgt ccatagtcc ttgtctgtc acaagagcca tcacaccgc  
38101 ggggcgtaat ttatcaagc atthtgcata gaaataatc tggattaaga agttgtactt  
38161 gtcatatcgt ttatcggaga cttgaaatc tccgaaaggc acgttccga taacaccgtc  
38221 aaagaagctg tcggggacat ttacttctc aaagcctgt gccgcaatgg aagatttctg

38281 ataaagctgc tgagcgatac cggctgaaat ggtatcaagc tcaacaccgt aaacctttgc  
38341 gttttcatt gacttaggca gcataccgat gaagttaccg ataccgcagg acggctcaag  
38401 cagattgcc tctgaaatc ccatctgttc caacaccttg taaatggcgg tagatacttc  
38461 gggcggagtg taaaaggcgg tcaaggtgct ttctctgcc gacgcatatt cctccggcgt  
38521 caggatattt ttcagcattg catactctgt atgccaagct cgggctcgtt cgtcaaaggc  
38581 ttcgggaata cgcaccaac cgacatatct cgacaagatt ttctgctcgt caggtgtggc  
38641 aaagcggttt tcttgctgac accttttcaa gaccgtaatc gccgcatagt tgcggtggaa  
38701 acgctctttt ttattgactt cttcaactcg attattggca aggtcaaagt tgagtcgctc  
38761 tgacatagga atatccgggt ggagggtcaaa gctcttacc tttgactttt tcttttgctc  
38821 ccaagcggga actatcaact caggttcttt atctcggctc tccttaactt caacgccgtt  
38881 gtgttcgat aaagccttaa agtcatcaag caagtcaggt ctgatacaca gcacagaacc  
38941 gtcatcttca aacacaaagg cttcatcaac aagaaaatga taaaactctg caccgtgcca  
39001 ttcgttatcg ctgtcccttg caacaagacc gttttcatca taactgagtt caatgctcgc  
39061 aatctttaat ctgccaagca cggaataaag aatttctgtt tctcggctcat aaaccgggac  
39121 ttcggcggca gcagccaca ggctttgcat tctcgtttg gtacagtctg tgaatcagg  
39181 ctgctgtgaa aactgacttt ctgcttctc aaaccattcc gtacctacat cggcaagctc  
39241 ctgattttaa atgctgccga ggtaatcaaaa gaaatcctca gtcgagtcatt atcccgtgc  
39301 agcttgctgt atctcgtcaa aagaaagcgt atttgaaca tactgacctc cggcattgct  
39361 gtcgggggta tagtacatcc aaattacact ttcattgtcc cggctcgataa agaaggcgtc  
39421 gtcataaccg gtttcggac tgaatcctg tacggtttca gtatcgtttt gagcttcatt  
39481 ttcgctgta acggctttt ctccgccgg taatacactg acctcaagt ggtcgttcat  
39541 tggatttca cgacttttc ggtcaaattc ttccttggga agctcctgtg tgaagggg  
39601 catatcaaag tcatagagca ttacacgggt ttcgtcaaag gataaatct catactgaga  
39661 agccccgata tacacgctgt cgccgagatg atattcatac tgtgcttccg tttcgtccac  
39721 tttgttttca ggctcaggcg gtgcggtaga gagtatctct cggtttttc tctgctctgc  
39781 aagctcggct cgccgttctt cctgctttc aagccattcc gggtactttt cttttcctt  
39841 tgggtttagg tatctgtcca tacggataag gtctccgata cgcttttcca cctgagacca  
39901 agaaagagta atgtgcggtt tctcgttcc gatacctttt gaaattgtga taccttttc  
39961 gtcgtgctgt tcgtcaatgc ctgcaccgat gatgaccgga taagagccgc ccaaccgta  
40021 ttcgttttc aagaagtcgg cgttctttt tgcggaaagg ctcttttcaa actgttcata  
40081 gatacgcat ttcctcgg aaactccgct tccacgggtc agtacagcgt ctatgatttc  
40141 ctgagaaaaa gtaaaggcag aggtttttg ttctctgcc tgatttcca taatgagagt  
40201 caactgaccg tccatagacg gaagcggctt cattgtatcg gtcaattctc ccaaaagtct  
40261 cattgcttca aaatgctgtg cgataacgcc ccagtcgtag aagctctgag cggttctgtt  
40321 ttcgtattcg cctccaca agtgaggac attctgaaat gttttgtagc ccacaagtct  
40381 gccgtcgttt aagtaagct ggggtgtaatc gttgtgaaa ataccctga tatattcgtt  
40441 acgggtcgc tttatccgtat ttctctcata gaagtctttg atttcttct ttgaagcggga  
40501 caaatgcggg gtagtgcca gtatctctcg gatagatca tcgccaccga aaaacggcag  
40561 gctctgtcc tcgtggtttc tctgtaata cttaagcga atattacctg attcttcacg  
40621 atttctgtg ccgagttct gatgtgttc atcagacgaa cccattctat catatcttc  
40681 gctttcatct gctccgtag cccggctttc tgtccatct gcttcagag agtttctcc  
40741 agttcgtggt ctctctgctg aacctccgcc aagtgactgt tcagaatccc ttcgtcaga  
40801 agattgtagt acaggatttt gtgatgttcc ttcagataag ttctctcat ctgcgacct  
40861 ctgccgagag tcaactccgt ctgctccggc agcttcaggt tcggaagatt gtagtctcc

40921 accatcgtgt atgtgatttc gctcatcgct ttgactcctt tcgtctttga tgtctttatt  
40981 gtattcggat tgctcctggt catcaattat gcgattttcc ttgctgagcg tgctgattgt  
41041 tctgctgaca gggagcaatg ccatttcagc aatgtcgctt gtagcaatgc ccaccgcatt  
41101 gagaacttcc tgtgaattga agcttgaaat cccggcaaag tcatcgggag aatagacctt  
41161 gtctgcgttc agtccaatc gagccataac catatatgac acgctgtttc tgacaagctc  
41221 caaatacaag gcatttgctt cgtcggcaga caaatactca atatcgctgc ctgcacccaa  
41281 actcataaag tcggagatat agtctgcat attgtcctcg acggcatttg caatgctctc  
41341 ttgacgaca tttcaatac tcgttgatc gttaccgcc ccgaaagtat tttcaagcgt  
41401 ttcgataacc tctgctcat attcgggtct catctccaa ataggaacag ggcgggaatg  
41461 tcggctttcg tgggtgtccg atatatcaaa gtaatgaatc agcctttgac ggcttctgtc  
41521 tgcgtcctca aatgcggcaa taccttttgc acctcggttt acccaacgac cgaaagtgcc  
41581 gttccatcgt tcgattcaa gcacggctgt tgcacgggt ctttgggcat aatgagaag  
41641 ctgtcatca aatcggagcc tgaattcct gctgctgtt tcagaaaacg attgccagtt  
41701 taccggattg tctgtaaccg caaagcaggt tcttcatac agctccgaaa tcaggtcaaa  
41761 tttccttgcc acctcgtctg cacctcctta tcgtgtttt tcttttctt ttgcaggtt  
41821 tgtgttttct tttgcggctg gttctacgg atgaccgttt ctctcgcaa gctcggcaaa  
41881 ttcgagata tggtagagat ttgtccgac ctcaaattg tagtctcga tatactgca  
41941 agttctctcc atgttttgc cgtcgccgag ctaattgag atttttctc cgtccgcaat  
42001 gcgaaactgc tcctgatagt gcgggtcaat aatcggata ccacgctcgg cattttcaa  
42061 gtggctgttc agccactct tctgatagca atagcagtac agattgtact cgcccctatt  
42121 ggggttaaac ctcataagat agctgtactt ttccgatca agacgaatgc cgtagtggtt  
42181 gcggtcatca ttaaaggaac tgcgggagt ggaataacag taagaggaca tagcctttt  
42241 gccggacaaa acatcgccgt cacgcaatcc gttatcaca tcgtcaaatt cagccttaa  
42301 ttatcgggtt tcaggtctt tctgaaatc gttcaagtc gtcaaaaact cgttcccgtt  
42361 agaaccgaag tcggcacgca aatatccgat aagaccggtc tgcatagaga gctgctgact  
42421 ttggctgaag gtgtatttac gctctgctt ggtcaatact ctgtaatcca tttcatcac  
42481 ctgctgtgtt cgtttggtt tctttgctt ggaatagaaa aaccatatac gccggcaata  
42541 tcatcgccga gtcttttgg aactcgtgtg atgtcggctc ttgtggctt tccgtttag  
42601 atttaactt gcagattttc aatctgcgta tcggtaacac cgtctttgaa tacacggtaa  
42661 agataatggt ttgtaccgtc gtgatgaaca gcgtcggctc gaaggtctcc gtattgtca  
42721 acataccatt ctgtgtagtc ggtgtcagaa taaaggcagt ccttaattgt gctgaaatc  
42781 atcatctgt atcccacac tctgccgtc catcggccga ggtcggcgt tacgataatc  
42841 ggctgtgaaa gctgaatgtt gagattgct cgttcatcat aaagattttc ggcattggat  
42901 tttaccataa tgcgtaaag ctcatcatcg gaatatccgg gatacagttc ctcaaagac  
42961 tctcgcaat catcaaggtc aaggctaata tcgctcaaaa tgatatggcg gtcattctgt  
43021 tcctgcctgc tcatcagtc cacctccaa ataagagaac agcttattgg ctttggctg  
43081 cttctgaaac tcgataatca ggctcatatc cggaatagtg ataccgggaa tttcaaaat  
43141 gctctccata tcaagctgct gcaatttctt ttcggtattg cagcctgcgt caaacagttt  
43201 cgtcagaagc tttgttttct gttgaaaagt gaattttcc ttcattgctt tgtctcctt  
43261 atcgttctt gtctttgtt cgcttctgt ttgaaagctc ctgtgcctt tctttgcc  
43321 attcaggcag acgtcaggc tttacctgc ccataacatc cattcttca tatcgggtt  
43381 attgcccgtt gtaagattg gtacaaaaca cggcgttcc acggctgtt gccgacgac  
43441 cgaaaccacc tgaacatag tagagctgtc tgcggctct ctgaaattca ggcttaata  
43501 ccttggggtc aatggctatg atttgacctg tgatgtctt ggaatagtg tcggggatac



43561 agtcggcttc tgttatgagt ggtattggaa tatccagttt ttcgacctgt tccttgaaaa  
43621 gctccgcttc atttgccaca cggcttccga aaaggtgtac gatttcgata tagtcatcgc  
43681 ttaccataca ttccgaacac agttcaaaaca ggctgtttcg ctctgcaaag cgcacataa  
43741 atttatcgcc gtttgactt tgctcattgg aagccaagat aacttccttt tcgcccacat  
43801 tgaccgagca aagaacagtg tattcaccga tttttctttt tcctcgttc atatccacac  
43861 ctacgcttac tcaatcaca attctgatgt ttccgcagtc gcagccactg cactgccttg  
43921 acagttcggg aaatagggat tgcactctct gtcttgctct gcggatagtc tcaaagcacg  
43981 gcaagccgta gcctttatag ttgttgacta taccctcaag cggtaaactc cgcactctca  
44041 tatagctgta tcggttgtaa tagcaaagga taagctgcat atcatcatic ctggtttcgg  
44101 ggcattctct gattattgca agcacttgc tgcaccctg cttttgctta ttcataatgc  
44161 acctccgtaa aagaacgggt ggcaagttt tctctccgc cacataagcg ttcttattt  
44221 ctttctgttc ttaactgca agaagataaa gccgccgata ataaaggcga ctaataaac  
44281 tgctacgatt gttttagcgt ccattactta ttgtcctct tcttctttt tctgtacgca  
44341 acaacggctg tgcctacaat accgagggca gaaagtcccg caagtgcagt ccacaagccg  
44401 acattgctgt tatctccggt ctttggtgtg tctctcagct cattgtgcat ttccacaacg  
44461 gtagtagagc cgaccttac ggttgcaatc ttatccgag gaagcacata ggaagcagaa  
44521 acagtatcct gaacctcgga aacgggtgaa tcgccgatac gaagtcctc gataatgatt  
44581 tcgccgttct tatcggctgt gaagctcgg tcgtaaccgt ttactcctgt tactctgaaa  
44641 gtgaaacctt cgaccttacc gtcagaggaa gttttacga ttttcaggct tcctttcatt  
44701 gccgtgtaa taaaaccgac gcccgcttg tttcaacct cataggtcat ttcatctcc  
44761 tcaatgaata cggagtacac accttatca agttcaaagc cttccgggtc tttggtttc  
44821 cttacaaggt atttccgta aagaagctcc ttatctcgt aaataccgt agaagtttcg  
44881 ttgagcgtac cgataagctc gtcgccgtc tccaattga cgtctccgtt tacatcttg  
44941 taaacctcaa agattgcacc cgtcagttg ttgtccgggt aatcttcac gaccttagtc  
45001 aactgatata tgcctgaaac atattcattg acgatttcaa cctcaatgac ctgaccgacc  
45061 tcggagattt taacttata agaagtttca tcaagcacga agccctccgg ctgctcgatt  
45121 tcttttcaa gccagtttc atacgtact ttgtcaaaag aaaagctacc gtcatttca  
45181 gaggtagcag tcatcaaagc atttctttt gtaaatcag tttcatcagc cttaaacaga  
45241 ccgattacag cacctccag tgcctgccg ttttcgtaa tcttctacc gaaacagaa  
45301 ccgtaaatga gcttgttct aatcgtttt ccgtcgttga ctgcaatctc aacatttgcg  
45361 gtatctgac cggaaatgct gaaagtgaac ggatacttgg cgtcggagag aatataatgc  
45421 tcatcgggtg caagctcctt aacatagtag cttccgaaag gaatttcggt ttgataaca  
45481 gccttaccgt tttcgaaag agagataatc tcaatcagac cgtctgccg gatagaagta  
45541 ccgcttgacg aaacaagttc ttcggcggca aaaagtcaa agctgatatt cttcattca  
45601 tcgccgttac cgatgttga gatgtcgtt tttcaatag tctttcaag acttaccgtt  
45661 actttctgcc tgcatttac aaaactgtg gcggtttcgg ttacagacac ttctgaccg  
45721 gcataagtca gctcaacctg gtgagcttct ttgttgataa ccataccctc cgggtcggta  
45781 attcaacca ccgtatatt tccgagataa agctcctac tcttggaag tccgtttca  
45841 tctgtgtaa cagtatctac gacttcgcc tttgcataac ggagtgtacc gtcgggagtg  
45901 ataatatct ctgctgcggt aatctcatat accgcactg caagacctt cactcatag  
45961 acaggctgat aatcacatc ggcattttc tctccagaga tatttaccct tgagaatacc  
46021 tcgccgttct tttcaatgct gacagtact tctgagca tattaggct atcgacctta  
46081 atcacgtaa taccacctc atcggaagaa tttcctctg ccacatcaa gtacaccggt  
46141 gtgctgtaa gcacatatcc gtaaggagcc tgaacctca caagagaata tccttgccg

46201 tattccagtt tctccggtgt aacaagctgt ccgtttgcac cgggtgtagaa agtatcaatc  
46261 gttgtcggag taggataagt gaaggtcatt gttacctgat taccgtcagg gtcaaagatt  
46321 ttgaagcctg caccggcata cggaatgttt ttaccgcttt ctgctccac ctaaccacc  
46381 ttgatatagc tttcaaagtt tgcgttggtg atgagatagc ggtaggtctg tccgttctga  
46441 gaaatgaaca catcgaagtc cttcatcagc tcacgacctt cccagcctgc ggtctgatga  
46501 acggtatata cgccgtaagg catatccttt gtctgaccaa aaccgttttc atcacaaca  
46561 atcacatctc tttcatcttc ttctgctgaa ttaaagctgc cggaagattt cagatagatt  
46621 tcaaaggttg ctccgttttc cgggttttca atctttgttt cgccgtcatc ggtgtgcttg  
46681 ataatggcga tattgccttt cataacctgt tcggtaacat catttgcggt ctgattgtgt  
46741 tccaccgtat aaagctgcgg ttctgcaccg accttatgga ttgtaccgtc gagcagataa  
46801 ccctcggacg gcgtgatttc acggattgtc cagtattat cacagatata ttctttgtg  
46861 gtaaactgcc cgttcttacc cgtaacatat ttgtccacaa gggtttcgcc ctataaatg  
46921 ccgtaaactg ctccggcaag ggtagcgtcg cctgcggtg tgccttctc tcggtcgtc  
46981 tttgttacgg ttacgtgaa cttttgaga atgttcgtga agtttctgt ggttgcttct  
47041 ttccagttaa tcggtgcggt ctgatttgca ggcacaacat aacggattgc ggtatccact  
47101 tcctcaatgg tgatgggggt agtgcgctt ataagcacat catcgaaaga agcaacaccg  
47161 ttcttatctg tcactgcata tcatctacg gcaatacccg caagcgaagt tccgtaaagg  
47221 tggaaagta caccctgac cagattatcc tccgaagatt tgataacctg aagattacct  
47281 ctcttgagaa cattattgaa gttgacctt gccacctgac cggcaacaac agtaactctg  
47341 tgaacctctc gcggtacata ttgtcgata gactgttctg ttaccgtgta aacaccgggc  
47401 ataaggttat ccagttggaa ttgcccgcg ttgvcggtg ttacagtctg attgacaccg  
47461 ttaccgctga tggtaaactg aataccgtca accttccgt cctcactgtt cttacaatc  
47521 tgacaagagc cgtagcttac cttcattttg acaaagccgc tgacagggtc gctgacctc  
47581 tgagcataag tgaccacatc ctgaatgccg ttgccattct gatggatacc gtcagaccat  
47641 acgacaacac ctctcggac accgttcttt ttgvcggtg tgatggtaaa ttcttgctc  
47701 ggagcttttt ccattgaaac agtcaatttg tttccgctga cagagaacga aacgccgtca  
47761 atatttgccg agaaattgta attgccaagc acaccgttg tatcggtag agttgcaaca  
47821 tacttgcttc cgttccattc aagctcgttc acctggcag aaccgcttga cttgtgcag  
47881 aagctcggaa ctttctgatg gttctgaacg ctggtacca tactgttgta gtacgacaag  
47941 atttgtctg ggagaggggt tgctgagctt acacattcaa gcacggcatt gtaccctccg  
48001 gtagaaactg gattgaagct tgcgtctctt tctccgacaa tcgtttcca aatcaaaatc  
48061 tgagtggcat aagcgtgtgc gatacagttt gcgtcgttt cattctgca cttccagctt  
48121 gtcgaaatac ctccacggta gccgtactgc aagatacgcg cgataagcag gcgaatatca  
48181 tcgccggaaa tcgtaccgtt cggactgatg ttgtgaaga agttctcgtc ctttcggtg  
48241 agagtatctc ctgtccgctg acctgtacc ggctcgatac agtaggcgat attgcccga  
48301 tacgaacca ttgcacgaag tcccgtatat ttctggaca agcctttcca accgtcata  
48361 tagttgagat tgccgtgtcc ccattcggcg ttgttattgg tatctccgct tcggggataa  
48421 tcgacgaggt acacatcggc ttttgcct acggctgcaa aggctgtcgt tgcccaatg  
48481 cccgtaaaag cagtaaggct cataaccgcc gccaacataa gcgagacggc tttcttgaat  
48541 tttgtttaa ccattcgtt ttctccttg aaatgcaaaa acgcaccgat ttactcagt  
48601 gcgtccgctt aaaattattt tgttttagca gtagccgata tagatgttgt aatccgtatc  
48661 ggatagcttt tctgtccata tccacacagc ggtaaaacc tcgctgttct tgatcggtt  
48721 cagtctgctt tcaatatcag acttgatacc gcttcggtta ggatttcggg atatggggtt  
48781 gtccaacat tctgtcggc tgatgtcaag agaaagcct atgcttacc catactctt

48841 tgcgtaacta acataagggc tgacatcgaa tgtctgcttg tgcggctctg tcggtttcgg  
48901 ttctgccggc ttttcagtcg gttttcaac cggcttttgt tcggcagttg tctgttcttt  
48961 tggctgttcc gtttgtttt cgggttcagc ctgcgtggtt gtctgcttcg tggctctgc  
49021 ctttggcttt tcggttgacg gagtatcagc cgtttttct tccgccggtt ttgtctgtac  
49081 cgtcataacc gtctgacttt cagcggttga ttggctttct tttgccgtaa tcggtgtttc  
49141 ctctgaact gccgtgcttt ccggttcttt tgccgatct tctgagaat ttgttcggt  
49201 attaccagcc ggaaaagaag tctccgtttt cgttatctcc tgtgcagctt ctttggctgt  
49261 gttaccgta caacctacga ggaaaatcat caggcaggca agaacacaag gtatcagcct  
49321 gttttcata tccatcgctc ctttctgctt taatcgtaat caaaaccggt caaaacatca  
49381 aaggtgcgat tggctgaact tttatcgta gcagacattt tgcttttct ccaaattgct  
49441 aaaccttta atagacagct atatgttatt gagatagata tactcaaggg agatagagta  
49501 tattttcagc aggttaatag ccggtatata taggggtag agtgtagaa agggggaagg  
49561 ctatcggctg tcacggctcg ctctgcttcg cagaaactg ttgtaatgct ccaatgcctt  
49621 gcacacaaaa tctccgctt ggcttatggg aatattcttc gggataagct gtcgaacct  
49681 gtcgcccctt aaaacaattt tctccctttg gtttggtttt tctccgaca taatcgcttg  
49741 gattgcttcg gttgtgagct tgcctcctc aaagaacttt cgcatacga ttgtttggtc  
49801 gtgggacgga gttgcgtcgt tcaggtcgat tcatcaacc acatcacgct gactgtcctc  
49861 atcgagaaaa gacaattcaa ccgccgctc cattttaatt cgcccctct caacataatc  
49921 caaaagtctg ggaacaagg ttgtaaggcg aatataacgc tgaatttgcg ttttgcgtc  
49981 atccgattta tctgtaaca acattactga tttgttccc accaactgt cccccagtg  
50041 gtcacaagtt aatccgtgc gttctcctg cttttcatc gcttcaaac gcattttgta  
50101 ggcataggct tttcagagg gaagtatctg cgacctttgg tagttgctct caaccattaa  
50161 aatcgtggct tcgtctcggc tcaggtcaac gacttcaaa cggagcgtat caaaccggc  
50221 aagctcacag gctcgtttc gtctgtgtcc tgaatgagt tcgtatctgc cgtcctctt  
50281 ctgccttact gtcgccggtg tgattacccc tcgttcttg atactctaa tgagctgtc  
50341 catatcctc tcatcacgca cttaaaagg tgggtcgggg aatcgtcaa tctcagtaa  
50401 gggaatatct cggattttg aaagctttc tcatctctc tgttctgcg ttgagaataa  
50461 gtcacgagc ttcgtgagag tgaagtcgct ctttctctt gccatcggct aacacctct  
50521 ttgtaaattc tgtgtaccc tttgacaccg tgctgcccg ttcgtaggca aaaatgctct  
50581 tgcctttgga agaagtctct gcggctttta cagcaatcgg gatataatgt cgatacatc  
50641 tgattgact accgaagttc tctctcagag cttctaccgt gcttttggcg aggttggtac  
50701 ggctatccac caaagtgaga agcataaccgt caatctcaa gctcggattg atacgtttct  
50761 ttactcgtga aatagtcccc acgagctgcg tcattccttt tgccggtaaa tactgagcct  
50821 gaacagggat aataacgctg tctgccgag atagagcatt gattgttacc attccgaggg  
50881 aaggcataca gtctataagg atatagtcgt atttgtcctt cacttcgctg agatagtttc  
50941 tcaatgccgt ctctctgctc attgcgttga caaggtaaa ctccattgct gaaagctcaa  
51001 ggtttgccgg aataaggtca acacctctg cgtgggtgag aataccgacc gtaggtgat  
51061 tcatcgtttc atttatgaca tctgtgagtt tcgttgcaag cgtgataccc aagttgtctg  
51121 tatcctgcca accgagaca gtggtaagt cgcctgtgg gtctgctct atgagcagca  
51181 ttttcttcc ctgcattgca agaccgacgc cgaggtttac cgtagtggtc gtctttcaa  
51241 ctccgcttt ttgattgcat atcgcaatc ttttgagtt cgacactttg tgcgtcctcc  
51301 tttcgtgaaa tcatagcca tcgagatg gctatgtact tgaccggctc atttctaac  
51361 cggtcgggca atattgttc tcaacacccc ttgccgagca ataagctcac gggaagtca  
51421 taaggaacag actgctaact tgatcatag gaattcacc tctgccgggt actccgccc

51481 ctccgtagag aagatcatt atccttctga ctgtcatcgc cgtaacaggg gcaacctgtt  
51541 acctataacc ggagttctcg ctgttctgca atgcagaagt cacggcgtac cggataaggt  
51601 ggctaaaatc atcagaatta aagtcttagt gaatggttta ttcagttgtc aaaatacaag  
51661 tgaaggggct gaccttttcg tggctcggaa ttaaccctt cacttgtttg aatgggaga  
51721 gcgttttgg ggggtgtttt ttcaaaattt ctgaaaatt ttttgctaa caaaaaaagc  
51781 cacctacttt cctcttaatt gaggtcaata gacggcgggt agaaatattc ataatttgg  
51841 tgtataatag gaaattaaga gaaagacaaa ttggaagttg gaggatacac gcatgaaaat  
51901 tgtaatcatt aatggaagtg ccagaaaagg aaatacgtg gcagcaatca atgcattat  
51961 aaaaggagcg tcagaaaaga ataaattga aatcattgaa cccgacaaac tcaacattgc  
52021 accatgcaag ggatgtgggt tctgtcaatg ctctaaggga tgcgtcgata aggatgatac  
52081 aaattctacc attgataaaa ttgtgccgc agatatgatt cttttgcta caccagtta  
52141 ttgtgggga atgtcagcac aattgaaact tatcattgat aagtgtact gccgtggatt  
52201 gcagttaaaa acaaaaaag ttggcacaat tgtttaggt ggttctccg taggcagcat  
52261 ccagtatgag ctgattgata agcagtttga ctgtatggca aaatatctt catgggat  
52321 gctttcaaa aatcatatt atgcaacagc cagagatgaa ctgaaaaa ataaggattc  
52381 catgaacgaa ctgagtga ttgaaaaaa ttataaagc acacaccaa ttccagtctt  
52441 gcgaagagac tgaacaac agaagattc agttgtcta acttactta aattagcaaa  
52501 gaccgctac aaaagttag gcggtctta ttcgtgtca gatataattg atttgaact  
52561 ttctttctt ggctgaaagc acctgcaaa gaatatcatc tgctgcgtcc gtgtatctg  
52621 cttgtgctat taggctgtt ttcaaacgga taagtattg cagcacttcg ctgtattctg  
52681 ccttgaaag gtataatga tttttgtt tttcaaac aaccacctc tgtaccgca  
52741 attataat aagaaatggc atagaatgag tgtgcgattg tcgcttgacc acccctaatt  
52801 gaacgaatta acagggtaac gaacgcctta ttcattagca ggaatttgc tcgaatttt  
52861 ctgccattag cagagagggc atttcatta gcaaatagc gaaatcctg ctaatttta  
52921 ttagcaagcc gtccacctga aaggcggacg acattagtcc taattccat tagctgacgg  
52981 agaatttgc aatgaaatc tgtgaaattt acgattttc tctttccc taaaaatgaa  
53041 aaaacgccg aaaccctga tttactggg tttccggcg gagttttgg cgttccgag  
53101 gtgattcgaa caccgacct accgcttagg agttctctgc gaaccgtggt agctagaagt  
53161 tcgattatc tctgggagc gttaatgcc gtaaataaa gcataagtgc ttgtatgtt  
53221 taattgttga tactctctgg tgtacctca tacaccgtag agtgtagca ggtgttagc  
53281 acaaaggct aattaaagc ttaatttat cagaaaacat tacaacaaa ctataaatca  
53341 tttatcacta gaaatcaaga tactcgtatg ttatagacgt tcagaaatga gcgtctatt  
53401 ttatacaaaa aatgaaagga gtataaaat ttatgaaaa gacattgaaa cgattgtgta  
53461 cgggcttctt agctcttga actatctta ctgcttacc gactacacc gttcatgcag  
53521 aaagtaagca atactggaca gaaagtgcag agcgtgtcgg tatcattgaa aaagtaatga  
53581 atgacggtc tatcggtcg acattcaatg agggcatgat gaaagttgag ggcaaacag  
53641 cctattgtat cgacattaac acagattta ggaatggcta caagaccaga gctgacgcaa  
53701 gctcacgcat gaatccaac cagattcag atgtggcgtt atccttagag tatgtcaaac  
53761 agtatggcga agctcacaag gaactgaact acaagcaagt ctatctgtt gaacaatgtg  
53821 tagtctggca gagattgagc gtacatctt gctggcaatg cgataactg cgagcttctt  
53881 atgatgaaat tcaaaggca acgcaggacg aagtttctc tggtgcaaga accttctca  
53941 aagaaaataa aggacgctat gaatgtggcg gttatatcta ctctggcgag gggcaggaat  
54001 tggggcaatt ctgggcaag ctgaatgtg gaaatgcgaa acttaaaaag acttccagta  
54061 atgccagcat tacagacggt aacgggaatt actcaatcgc tgggtcgacc tatggtgtct

54121 ttactgataa ggactgcacg aaacagcttg ccacccttac gactgatgaa aacggaata  
54181 cagatgttgc agaggtaaaa gcaggcacag tctatatcaa ggaattatcc gcaccagcag  
54241 gatataaagt agataaaact gtatattcct taaagattga agctggaaag acggcgactt  
54301 tgaacgtatc tgatagcca aaagtaacgg acactttgat tgagcttttc aagatagata  
54361 tggaaacaaa gaaagacaat ccgcaaggga acgcttcttt agcaggtgcg gaatttacat  
54421 ggaagtatta tgctggcttc tataacaaag acaatctccc tgccgaagct actcgaacat  
54481 gggttacaaa gacaatcgct gaaacagaca gctacgggac aactcattac atcacaaaat  
54541 tagcggacgc atacaagggtg tctggcgaca gcttctatat gcaagacgga aaagccgttc  
54601 ttccacttgg gacactaacc atagaagaaa caaaagctcc aaacggctac ttgttagagg  
54661 gtgcatatat gcaggctggc gataagtcgg aacagataaa gggcttatat gtaacacaga  
54721 ttaccgagga cgacgacctt gccgtattat ctggaagtaa ccagttttcc gtatcagaca  
54781 aggttatccg tggcgggtgtg aaaattcaga agcagagattt agaaacgggc gatatgaagc  
54841 cacaaggaag tgcaacctg aaagatactg cttttgacat catttcctta aatgataatt  
54901 ctgttttggg tgagggcaag ctatacaaga aaaatgaagt ggtaaagaca attcgtaccg  
54961 atattgaggg tgtcgtctct acttctgctg acctcttacc ttatggaaaa ttccgtattg  
55021 ttgagagtga agctcccgcg gttacttaa ctgacgggtgc aaagccgatt gattttacaa  
55081 tcacagaaaa tggaaaaatc gtggacttaa ccgacaaagc ccattctatc tataatcaga  
55141 ttaagcgtgg agatattgag ggtgtaaaaa tcggtgcagg cacacacaag cgtcttgctg  
55201 atgttccctt taggatcaca agcaagacga caggagaaag tcatatcgtg gtaactgaca  
55261 ataacgggca gtttccact tctgctgact gggcttctca taagcacaat accaacgcag  
55321 gcaagaccag cgaggacggg gtgtggtttg gaacttctga accagacgac agcaaagggtg  
55381 cgttacctta cgatacttac gtcattgagg aattacgctc tgaagcaac aaaggctttg  
55441 aacttatccc acctttgaa atcgtggtat caagaaataa tcttttgatt gatttaggaa  
55501 cgctgactga tgaatacgaa aaagaaatct ctatccatac cacagcgacc agcaaggacg  
55561 gcgaaaagac tatccttga ggaaaagaga ttacgattgt tgatactgtc aaattagacg  
55621 gacttacaaa aggcacaaaa tatcagctca aaggctggca gatgttaaaa gaggaaaacg  
55681 ccgagcttat cattgacggg aaacgtgcag aaaatgatta tacctttgtc gctgatgagg  
55741 aagaaatgaa agtggaaatt gcctatacat tcaatgcgtc tgctttaggt ggcaagaacc  
55801 ttgttacctt tgaagaattg tatgatttga gcaatccaga cgaacccgtg aaagttgcgg  
55861 aacacaaaga cattgaggac gacgggcaga ccgttttaac cacagagcgt atcatcaaaa  
55921 ttacatcgac tgctacgaat aaggacggca acaaagagct tgaagctgga aaaacgtta  
55981 caatcattga taccgtaacc ttagagggct tagaagttgg tacacagtac aaacttggg  
56041 gctggcagat gttgaaagaa gaaaatgcag aacttcttat caatggaaaa tgttgggaaa  
56101 atgattatac gtttactgct gacagcgaat ctatgaaagt ggaagttgct ttacgtttg  
56161 acgctacttc tctgacggg aaacagcttg taacttttga agaattgtac gatttaagca  
56221 atccagacga gccgaagaaa gttaccgagc ataaggatat tgaggataag ggacagacga  
56281 ttacctttaa ggaaaagcca gaagaaccag agaaaccca aacaccacag ataccagaaa  
56341 agccgagcag accgagcgc agtcccaaaa cgggcgacag tacaatgta atggcatttc  
56401 ttgtgatgtt gcttgcgtct gctggtggac tggctggaac atatctttac aaacgccga  
56461 aatgaagaa atcataaggc ggtaacggta tgatgaaaga aaaatcacgc tctccgccga  
56521 agctgtcaaa cggcagactt ttgcttattc tggcttctc gccaccaacc tgcaagaaca  
56581 cggatagtca aggggtcgaa gcattgattt taccctttac tatctggggg attgctggta  
56641 cttcccaaac cgccagaata agaaattaca atcaattat caaaatagaa agaaacgagg  
56701 taaaacatta tggaaatgaa atatgtcgtg ccagatatgg cacagtctt tggactctt

56761 gaatttcag gagaaagcga gcctatcttt gaaagagata aaaataaccg cagggtctta  
56821 gccagacgaa gctataacct ttattctgac gtacagaaag gcgaaaatgt ttagtgtaa  
56881 attcccgtgc aggctggcga aaagaagttc aagtatgaac agaaagtaaa acttgcatt  
56941 ccgaagtgt acggcagagg ttacgcaatc ggggatatgg gacataccga ttatgtatta  
57001 gttgctgatg atattgtagc agttgaagaa aagtaaagga gtgaagaatt tatgagatta  
57061 tcaaacgggt ttgttattga caaagagaaa acatttggcg aattaaatt tacagcggtg  
57121 cgtgatgtgt ttatgcagaa tgaggacggg acaccgagta cccagctta aaagcgtatc  
57181 tatgacttga aatgtagtct gcatggtgga attatccccg tgtccgtacc gccagaagt  
57241 ccgtaaggg aattccgta caatgcagtt gtagagcttg tcaatccccg agccgatac  
57301 gtatcaagaa agacgttgg tggcagat gtggactggt atgtaaaggc agaggatatt  
57361 gtgtgaaga ataaaggcaa tcagaacgca ggcaatccac agaaccatgt accgaggga  
57421 cagacgaaaa aataaatcta ggtcatagat tatactctga aattacagta taatgagcca  
57481 aaagagccgt atttaagcta tgtaaaataa tttgacaag gaaaaaagg atttgcgaa  
57541 gatattgatg agacatttga gggtaatat atgacaatga caccgaaagg agcaatcggg  
57601 atatggaaat aggtaagaaa cttaaaatg cacgagtaca gtctggaatg acacaagaaa  
57661 atgttcgaga aaaaatcaat gtatcaaggc agacaatttc aaactgggaa aatgaaaaat  
57721 cttaccaga cattatcaat gtaatagagt tgagcaacct atattctata agtcttgac  
57781 aattgctaaa gggatgtaa aaaatgattg aacatttaga agaaagtaca aatgttgtaa  
57841 aaagcaacca aaaaatgata tgggcaatta ttgtaaatat cattgtcgtg gcattgctga  
57901 tagcattaaa tatgtttata ccagataacc gttatttctt agttggaata tttgtctta  
57961 tggttatcac tcatcagca ttactttacc agataatcaa aaaatttaa ggaggatatt  
58021 ttgttatgaa ttgaacata gtttagcgg taatttggg agcagttgca ctgtaggag  
58081 cgtttgtgt tgttttcag atttatcata tgactgtat agacgcaaca gccagaggat  
58141 taaagcacc taaatttgg ggagtatta caatgagtg gaataattca agtggttgc  
58201 ttatgatct aatcggaga agaaaatacc ctattgtaa tatgagtgaa agcaactcaa  
58261 aagaattaga aaaacgtaa aatcagcag gtattggact gttattttg gctattggtg  
58321 taattggcat tatatgtgc acctaatat aactaaaaat gcagattat gattatatct  
58381 tgcaacattt acaaagcagt tagtctatat gattgactgc tttttcgtg cccagaaagg  
58441 agtgaatgat ttatgcgtaa gatttgaat agaggacacc gtatcagagc cagcagaag  
58501 cacctgtct accattttc catagggacg cttctgtttt tattctggc ggttctctg  
58561 ctactgaata tcaaacagct catgcgtacc gactgggagc atttcagctt gtagagaac  
58621 ggcttgacgc tttcccctta caactcata accatactga tagcactgg tgtttgtgca  
58681 ttgtgcgctt ttctgtatta ccgcttctgt tacgacagtt tcaagaagct cctgcaccgt  
58741 caaaagctgg cgagaatgat actggaaaat aagtggatg aagccgatac cgtacaagac  
58801 agcggtttt ttactgacct gcaaagcaga tcaagggaaa aaatcgtctg gttccaaag  
58861 atttattatc aatggaaaa gggactgctt catatccgct tgaaattac gctgggaaaa  
58921 tatcaagacc agcttttac gtagaggat aaattggaaa gtggattata ttgtgagctg  
58981 accgacaaga cttacatga cggttatatc gaataatccc tgctttatga tatgatagc  
59041 aaccgatta ctattgatga agtacgggca gaaaatggct gtcttaaatt gatgaaaaat  
59101 cttgtctggg aatatgacgc actccctcac gctctgattg ctggtgggac tgggtggcgt  
59161 aaaactatt ttctgctgac gctcattgaa gccttactgc ataccaacgc tgcctttac  
59221 atcttagacc cgaaaaatgc ggacttagca gacttaggga cagttatgga aaatgtgat  
59281 cacacaaaag aaaaaatgat tgattgcgtc aatgcctttt atgagggtat ggtacagcga  
59341 agtgaggaaa tgaagcgaca cccgaactat aagacgggagc aaaactacgc ttatctggga

59401 ctgccacct gctttcttat cttgatgaa tatgtggcgt ttttgaaat gctggggaca  
59461 aaagaaagcg tgggcttact tagccagtta aagaaaatcg ttatgttagg acggcaagca  
59521 ggatatttcc ttatcgttc ctgccagcgt ccagacgcaa agtatttctc ggacggatc  
59581 agagataact tcaatttccg cgtgggactt gggcgtatca gcaattagg ttacggtatg  
59641 ctgtttggtt cagatgtgaa aaagcagttt ttccagaagc gtatcaaggg gcgtggctat  
59701 tgtgatgtgg gaacaagcgt tatcagcga tttcacgc cttagtccc gaaaggacat  
59761 gacttttgc agactatcgg ctctctgca caagcaaggc aggacgggac ggcgacgtgc  
59821 gaagcgaaag gcgacggcac ggactagccg ttgctggtgt ggcgtaagcc acgccagcag  
59881 gtaaaacccc tcggtatcta acagaggggt acgtttgcaa atagacaata gacgaaaaac  
59941 ataggaaaca taaggcttct ggcatgattt cccagtaaaa atcggctgtg aagtcgcctt  
60001 aaaaaacttc aacttgaca gattgggggt atggttctga atgaagaaca atggataaaa  
60061 gaattacggg agaaacggat tgcttacggt atctcaaac gcaggctggc ggtggcttct  
60121 ggtatcaciaa gggaatatct caacaagata gaaagcggaa aatgaagcc gtcaaaggaa  
60181 ctcttgaaa ctctgataa agaactggca aggttcaatc cagaagcacc gcttaccatg  
60241 ctgtttgatt atgtgaaat tcgttttccc acgctggata tacagcacat catcaaagat  
60301 atattaaac tgaatatcaa ctatagctc catgaagatt acggacatta cagttatagc  
60361 gagcattatt ctttagggga catctttatc tatacgtcgg ctgacgaaga aaaaggtgc  
60421 ctttagagt taaagggcg tggttgccga cagttgaga gttacctgct ggcacagcaa  
60481 agaagctggt atgactttct catggacgca ctcatagacg gtggcgtgat gaagcgtatc  
60541 gaccttgcta tcaacgacca tacgggcatt ttggatattc cagagcttgc ggaaaaatgc  
60601 agaaaacggg aatatatcgg aaagtccaga agttataagt tttaccagtc gggcagcctt  
60661 atcaagcaca gcgaggacga cagagaatat atgggacgta ccctttatct tggttcgtg  
60721 aatctgatg tatatttctg tatctatgaa aaggactatg agcagtatgt caagttaggg  
60781 acacctctgg aagaagccga tattatcaac cgttttgaga tacggcttag aatgaactg  
60841 gcctattatg cagtacggga tttgctgacg tattacgacg cagagcagac cgcctttct  
60901 atcatcaatc agtatgtacg gtttgttgat gaagaaccag acaagcggaa aatgactgg  
60961 aaactcaatg accgctgggc ttggtttatc ggcgataatc ggcaaagtct gaaactgac  
61021 acaaagccag aaccttatac cttagatcgt acattgcgtt gggtacaaag gcaggtagca  
61081 ccgacctga aatgctgaa aaagattgat aagggaacg gtacagatta catggagaca  
61141 atcgaacagc aggcaaagct cacagaaaag catgaaatga taatcaaca gcagacgacc  
61201 cctgcaaaag atttagtaga aatttaggag tgatgaaaaa tgtgggtatt attaaaagc  
61261 ttctgctgg tatctatggg aatgggtatc ggcatagtct tgatgtgat tttgaatgc  
61321 ggcaaagaag ctgactataa aatgaaaca ttagaagaaa gcgaggaca ttaaataat  
61381 ttcggacaaa atttgatca atggtttta agtaacgac agagcttagt gcttatggc  
61441 atttggtta tcggtatcta cttagggttc aagcgtgagt tttccaaact tatcggctc  
61501 ttgtagttg cttgattgc tgcggttg gtattcaatg ctggcgtgt gaaagatga  
61561 ttgtagagc tgttaataa gattatcgg gcataaaatt ttattgtgt actgatatgc  
61621 gaatgttata attgaaatg tgtattacat aaaacgctgt acttaccaga aaaatctatg  
61681 aattttgat attatacaag gttgcaact gaagttgcta atgtgcattt caaaaaat  
61741 agaataaac attatggctt gataaaattt atcatcaaa tcataggagg tatcacacia  
61801 tgagtttagg agaaaaatc ttcaagtaa gaaaagaaa aggaatatcg caagaagcac  
61861 tagctgaaca aataggcact actaggcagg caattagtaa atgggaaaac aatcaagggt  
61921 ttccagaaac agaaaagctt ttacaattat caaacattt tgaagtatct acggattatc  
61981 tttgaaaga cgaaaagaat gtaaagaata gtgaagaacg aggatattat gtaagcaagg

62041 aaatgctggt agggtttatt gctaatacaga aaaaattagg actttatctt gcttttaggg  
62101 ttatgcttg catttttgc ggaataccat ataccttgtt ttagataat atgacttggc  
62161 gttatttagg tatggcattt tgctttgtgg caggaattat atttttgtc gtagcaatt  
62221 ttatgaaaa acaagaatac aacatttaa ggcaagaacc ttactactt gattatgaat  
62281 atctaaaaga attgaaaagc gaatacactt caaaaaagaa aaaatatgta atagttgctg  
62341 ttcctgtac tgttctctt atagcaggac taatttctt tctattact gtgaaaggct  
62401 atatttcatg gacagaatat cattccttg cattttcgg tcttgctgtt ggaatgttg  
62461 gttttgata tacaatcaat gttatggaaa cctatgaact attagtgaaa aacgagcaat  
62521 attcaacgag tttcttttc aactaaaaa gaaagattaa aaagagatta ggataagcta  
62581 taatttaata ttcacacaaa gcagttagtc ttatgattga ctgcttttt catacaaaa  
62641 tttcagattg gattgattac atgaacgata ttttaagga tatgcaggca aaagtcggct  
62701 gtgaatacat ttctgactg cctcttaca agcgttaagg gtggcgtgaa atgaaacggc  
62761 tgagccctgc cgattatgaa gaaagacaat tagaagattt tcaaagttt gtgtttgta  
62821 tgccgtacca gaccttaaaa gatgtgatga aacaacagaa aggacgtgaa gaacaatgca  
62881 ggaacaagg gtgctggtgg aaacgagaga acaactggc gaagaaaca catcactg  
62941 gttcgacctg ccgatagatg ttgccgagtt tgaagaaaag ttaggtgtcg gtcagaaaag  
63001 cacggcgtac cgcattatcg aaaagggtt gccttatgct gatgaagtcc acgaacatac  
63061 aagcgtgtac cagcttaacg aattagagtt tatgtaccg cagcttcaa gcgatatgca  
63121 ggaagaatat gtactactac ttacgggtt tgagaattta gaagcactt atattgacg  
63181 gaacgtgatt acggtttatc ccgactgcaa aagcatgata gatgttcaa ggcaaaagct  
63241 gatgaatgac tcgacgttca aacattatc cgaggactgt caagaatact actttgact  
63301 tgaagcctac gcttctact tgcaggaaca cgggaaattc ttagtaacgg aacacggat  
63361 cttgaaacta ccagagtagg aaatgaggtg gtgcttatga tagatgatat ggcggtttac  
63421 attgctaact tcggtaaata caatgagggt tatttagtgc gtgcttggtt cacgttccc  
63481 attgacgagg aagatgtaaa agaaaaaatc ggcttgaatg aacagtatga ggaatagct  
63541 atccatgata ccgacaactt cccattgacg attggcagat atgtttccat tgaagaactc  
63601 aatgagatgt atgaaatgat agaggaactt cccgactata tcgtagagt tctggacgaa  
63661 ttatcagtc actacgggac gctggaagaa gtcgtggaac acaaggacga tatttattat  
63721 tatcccgact gtgaaacat gacagatgtt gcctattact acatagacga attgcaggca  
63781 cttggggaca ttccaccag cttacagaac tacattgatt atgaaacct cgggcgagat  
63841 ttggatatgg gcggttgctt tattgaaaca agccgaggga tatgcgagat accatattaa  
63901 cgctggaaga tcagcaacgg catggttct actgacagcg ttttctctt ttaagggaca  
63961 gtctgaaaat ggctgtcctt ttctcttga agaacttacg aaaggagctg aaagaactg  
64021 aaaaagatta aatcttatac gggatctg aacgtggaaa aagtcttga tgcaatcaat  
64081 gacttaacc tgcctttcc cgttacctt acacagatta catggttgt gattacggaa  
64141 ttatcatca ttctgttg ggatattccc cactttcca tgattgagg agcatttct  
64201 aaatactcg gtattcccg tgcttctact tggttatgt cgcagaaaac cttgacgga  
64261 aagaagccgt acagctttt gaaatcacag ataacctatg ccctgcgacc taaaactact  
64321 tatgcgggaa aagccgtaa actgcataag cagacctga atgaaacaat cacggcagta  
64381 aggagtgtga actatgtcc cgataaata tattgacaat aacctgtct ggaacaagga  
64441 caatgaggtg ttcgcttact atgagctgat accgtacaac tattctttc tatccgcaga  
64501 gcagaaatt atcgtcatg acagttccg acagcttact gcacagtccc gtgagggtaa  
64561 aattcatgctg ttgcagattg ctacggaaag ctcaatccat agtatgcagg agcagtcaaa  
64621 gaagctggtg actggaaaat taaaggaagt tgctgcccag aaaatagacg aacagaccga



64681 agcgtagta tctatgattg gtgacaatca agtggactac cgctttttc ttggctttaa  
64741 gctcatgggt acggaagaac agctcaatct gaagaacata aaaaaatcgg cgtggctgac  
64801 gttcacggaa tttctcatg aagtgaacca cacgctgatg aatgatttg tttcatgcc  
64861 gaatgatgaa atcaaccgtt acatgaaaat ggaaaagtta ctggaaaata aatctcccg  
64921 tcgcttcaag gtgcgtcgtc tggaaatcaa tgattttggg tatctcatgg aacatcttta  
64981 cggcaggaac ggtatcgcct atgaagatta tgagtatcag ttaccaaaga agaaattgaa  
65041 caaagaaacg ctgataaaat actacgacct tatccgtccg acaagggtg tgattgagga  
65101 aagccagcgg tatttacgat tggaaatga ggacaaggaa agctatgtgt cctactttac  
65161 cgtcaatcgc attgctgggg agcttgattt tccgtcaagt gaaatcttct attccaaca  
65221 acagcaattc acattcccc ttgatacttc tatgaatgta gaaatcgtgg agaatcgaaa  
65281 ggctcttacc acagtaagaa ataagaaaaa ggaattgaaa gatttggata atcacgccta  
65341 tcaagcagga agtgaacca gttcaaatgt ggtggacgca ttagacagcg tggatgagct  
65401 ggaaacggac ttagaccaga caaaagaaag tatgtataag ctctcttatg tagtgcgtgt  
65461 atcggctgat gatttggacg aattaaacg ccgttgatg gaagtcaagg acttttacga  
65521 cgacctcaat gtaaagctgg tgcgtcctgc tggggatatg ctggggcttc attctgaatt  
65581 tttacctgcc agcaagcgt ataatcaatga ttatgtcag tatgtaaaat cagattttt  
65641 agctgggctt ggctttgggt cgacacagca gttaggagaa actacgggta tctatatggg  
65701 ctattccgtt gatacgggaa gaaatgtga cctgcaacc tcccttgcca gtcaaggtat  
65761 aaaaggtaca gttaccaacg cccttgctgc tgctttgtc ggttcgcttg gcggtggaaa  
65821 gtcgttctgt aacaatcttc tgggtgatta ttcggttctc ttgggggac aggcggttat  
65881 cttagacca aatcagagc gtggcaactg gaaggaaaca ctccagaaa tcgcacatga  
65941 aatcaatc gtaaactta ccagcgataa aggaaatgca ggacttctg accattcgt  
66001 gattatgaag aatgtaaaag acgctgaaag tctggcaatc gacatctta cattccttac  
66061 gggattttc tctaggacg gcgaaaaatt ccccgactt cgtaaagcgg tacgctccgt  
66121 taccagagc aacagtcggg gcttgctcca tgtgatagac gagctacgcc gtgaagatac  
66181 gcccatatca agaaatcgc cagaccatat cgacagctc acggactac actttgcaca  
66241 tctgctgtt tcagacggga cggtagaaaa tgctatcagt ctggataacc agctcaaat  
66301 cattcaagta gctgacctg tactgccaga taaagatacc acttttgagg aatacacgac  
66361 cattgaatta ttatcggtt ctatgctgat tgtgattagt accttgccc tgattttat  
66421 ccattcggac agaagtatt ttaagattgt agacctgac gaagcgtggg cgttcttaa  
66481 tgtggcacia ggagaaacgc tcttaacaa gctggttctg gctggacgag ctatgcaggc  
66541 aggcgtttat tttgttacc agtctgccta tgatgttca aaggaaagtc tgaaaaacaa  
66601 tatcggcttg aagttgcct ttcgttctac tgacattaac gagataaac agacctaga  
66661 gtttttgggt atcgacaagg acgacgagaa caaccagaaa cgcttgctg atttagagaa  
66721 cggacaatgc ttattgcagg acttatacgg acgtgtcggg gtggtcgaga tacaccctg  
66781 cttgaagaa ctgctacacg ctttgatac cagaccgcc gtacagagaa atgaggtgga  
66841 gtgatgaaag aaaggataaa aggtgcgttc acaaaaaaga agattttcca ctttctcaa  
66901 atggttctgt tcgtggtggc actctccctt atctgcttt cacttctggg gacggtggct  
66961 catcgcagcg ggcttggtga cgataccata aatgcagaaa atctttactc aaaaatccg  
67021 ctgtcgaatt accagcttga ttttatgtg gataatagct ggtcgtggct tccgtggaac  
67081 tggctggacg gtatcggaaa atcgggtcag tatgggcttt actgcattac caactttgc  
67141 tggacgataa gcctttatt aagcaatgcc acgggctatg tggtcagga agcctataaa  
67201 ctggacttca ttaacgatat ggacagcagt atcggaaaaa gcatacagac cattgcaggc  
67261 gtaacacaga acggtttttc ttctacgggc ttctatggtg gtttctgct tctcattac

67321 ttagtgggtg gactttatgt tgcctatacg ggactgataa aacgggaaac cagcaaggca  
67381 cttcatgccg ttattaactt tgtgggtggtg ttcgtgctgt ccgcttcggt tattgcctac  
67441 gctcccgact acatcaaaaa gataaatgaa ttttcaagtg atattagtagc cgcttcggtg  
67501 gacttgggaa caaaaatcat gctcccaaac tctgacagca agggcaagga cagcgtggac  
67561 ttgataaggg acagcctatt ttctattcaa gtggaacagc cgtggttact cttacaattc  
67621 gggaacagca acgcagaaga aatcggggca gaccgtgtag aagctctggt atcggcaagc  
67681 ccagaggacg aggacggaaa gaccagagag gaagtcgtga aaacagaaat cgaggacaac  
67741 gacaacaaca atctgacgat accgcaggtc gtgaaccggt taggtatggt gttcttcta  
67801 ctgttttca acttagggat aacgatattt gtattcttgc ttacgggcat gatgttattc  
67861 agccagatac tttttattat ctttgctatg tttctgccta tcagctttt actttccatg  
67921 ataccgagct atgaaagcat ggcaaagcag gcaatcgtga ggggtgttaa taccataatg  
67981 acacgagcag gaataacgct cattgtaacg gtggcgttca gcatttcag tatgtttat  
68041 aacatatcca cggactatcc gtttttcatg gtggcgttct tacagatagt gtgtttcgt  
68101 ggtatctaca tgaagctggg tgacttaatg agtatgttct ctttgaacgc taatgatagt  
68161 caaagcatgg gacgaagaat tttccgcaga ccatatctat acttggcaca tagggctaga  
68221 cgtatggaaa gacggcttgc tgggtcgggt actgctgggt gtgttgctgg tgcgggtggct  
68281 ggtagcacga tttcaaacag aaaagcgaca aggaacacag ctacaaaaga tagtcgggggt  
68341 aatacatctt ccagcatggg acagcgtgta ggttcaaagg tgggtgctgt cttagataca  
68401 aaaaataaag tgaagataa ggcaagtgtc gtcaaagaga atatcaagga tatgccgaca  
68461 cagaccgctt atgccgtcca ctccgaaag gaaaaggcaa agtcagcgt gtccgacttc  
68521 aagcgtggca tgggtcagga acagcagtc agacagtcgg gacgtatgga aaaacgggaa  
68581 cagcataggc agaatatcgc cgataagcgt atggagcttc aaaaggcaca agaagcaagg  
68641 caggcacagc gaaaggctga cggatcagcg acaacgggag ctaccgctcc ccatgagcga  
68701 ccagccacag cttcaacct tccaaagccg agtgctgaaa aaacgcagga agtcaaacgc  
68761 cctgccacag cgacgacttc aaaaacaaat gagccagtca agacaacggt tatcaaagag  
68821 cgtcccttat cttcgggtac ttctgatagg aaaacgagcc agcctacaca gccagtatc  
68881 aggcagaatg tagaaaaagt ggtatcgag gaaacacgcc agaatgacac caaagaccgc  
68941 aggacaaaag ttacgagac gcaaagcgtc cagaaaaacc agcagaccac agagaaaacc  
69001 cgtaaccttg taatgaagaa aggacagaag aaaaaatgaa actgaaacat attgctatta  
69061 tcggcagctt gtttctatc ctctttcac tgggtccttt ctttgggggtg ttgattagt  
69121 cggacagcga cgacgagaac agcaactttt ctctggcat tacgggtatg aacttatccg  
69181 cagaagtctt gaaacatcag cctatggtgg aaaagtacgc cagagaatac ggcatttccg  
69241 agtatgtcaa tgtgttgctg gcaatcatal aagtggaaag tggcgttaca gccgaggacg  
69301 ttatgcaaag ctctgaaagt ctgggactac cgccaattc attagataca gaaagttcaa  
69361 tcaagcaggg gtgtaaata tttcgtccc tgctttcgtc ctgcaaaaat caaggtatgg  
69421 acgattgaa thtagcgata cagtcttata actatggcgg tggttatgtg ggatatgtgg  
69481 caggaaaagg aaataaacac actttcaacc ttgcagagag ctttcccgt gaaaaatcgg  
69541 gtgaaagaa agtaacatac accaatcaa tagctgttgc gaagaatgga ggctggcgggt  
69601 atagctatgg aatatgttc tatgtggaat tagtcaatca gtatttaact gttccgagc  
69661 tgtcgggaga gctggcacia aaggtaatga atgaagcgtt gaagtatcaa ggctggaagt  
69721 acgtctatgg tggtagtaat cccaactt ctttgactg ttcgggactg acacaatggt  
69781 gttatggaaa agctggtatc tcctaccga gaacggcaca agcacagtat gatgctacc  
69841 aacatctccc actctcgag gcaaaggctg gggacttgggt attttccat tctacctata  
69901 acgctggttc gtagtaacc cacgtcggca tttatgtagg aaataaccag atgtaccatg

69961 caggcgacc gataggatt gcagacctaa gcagtagtta ctggcaacag cacttaatcg  
70021 gtgcaggacg agtaaaacaa tagaaaggac tgaagatat gttaagaaa aataagaaac  
70081 agacagaaac tatcaaagaa ccaaaagaaa aaaaggtgcg tactgtcaag gtaggcacac  
70141 ataagaaaac tgtgattgcc ttgtgggtgg tgcttatcgc aagcgtgagc ttcgggggtg  
70201 ataagaattt taccgctatc gaccagcaca ccacccatga aaaagaaatc attgagcttc  
70261 gcttgacagga caccaacggg atagaaaatt tcgtgaagaa cttgcaag tcatattaca  
70321 catggaataa cagcaaagaa gcgattgaag caaggacgca ggcaatcagc ggttatctga  
70381 caaaggaatt gcaggacttg aatatagata ccattagaac cgacataccg accagctcca  
70441 cagttacaga tgtgattgta tggcatatcg agcaatcggg aacggatact tttctgcta  
70501 cctacgaagt agatcagcag ataaaagagg gcgaacagac aagcaatgtg aaagcaact  
70561 atactgtaaa agttcatgta gacgctgacg gggatatggt aatcgttcag aaccctactc  
70621 ttgcaccagc aatcgaaaaa tcagactatg atccaaagac accagaaaca gacgcaagtg  
70681 tagacgctga tactgcaaat gacgctaccg catttctgga aacattcttt aagttgtacc  
70741 caacagccac agaaaacgaa cttgcttatt atgtgtcggg gaatgtgctt gaacctatcg  
70801 gcagggacta ctttattct gaactggtaa accctatctt taaaaagac ggggagaatg  
70861 taaaagttaa ggttgctgta aaattcctg ataactagac aaaggcaacg caagtatcgc  
70921 agtatgagct tgtgctacat aaggatagta actggaagat ttaggataa ttgtaaaagg  
70981 cttgatcat attttatgc tctgcaagcc ttttaatt gacaactgta ttttaagta  
71041 ttatgctgta cttgtataag ctatacagta tagaacaagg cggtgtttaa atggaaatct  
71101 ttatcaataa tcagtcaagc atacctatt atgaacaaat ttctcga ataaaagcat  
71161 tgattataaa tggggaatta aaggctggcg aagctctacc atcaataaga ggacttgca  
71221 aatcattgca tataagtga ttgactgtc aaaaatctta tgatgtgctt caaaaagacg  
71281 gttttatcga aacaacagca ggcaaagggt gttttgatc tgctcaaat caagatctt  
71341 atatagaaga acaacagaaa aaaaatcgaag atagattgt agaagctatt gaaatagccc  
71401 gtgcaagtgg cataaacctt gataaattga ttggattatt aaaattatta tatgaggagg  
71461 acgagtaaat ggctgaaaat atttagaag ttaaaaacct taaaaagat tatggcgatt  
71521 ttgtattaaa tgacttaagt tttccattc ctgaggtgt aattatgggg cttattggcg  
71581 aaaatggagc tggaaaatcg accacagtaa attgtattt gaacgaaatt aagaaaaaca  
71641 gtggaacat tttgatttt ggaaaagacc acataattga tgaatgtgaa ataaaagata  
71701 aatcggaaat tttattgac gaaaaccact ttccagatat tttacacca aaagaaattg  
71761 aaaaatata gtcgggaata tataccaatt gggacagat agcatttcgt aattattga  
71821 aacagttcga attaccagca aagaagaaaa ttaaagattt ttctaaagga atgaaagtaa  
71881 aactgcatt cgctgttct cttcacata aagcagaatt acttatatta gatgaagcaa  
71941 caagtggatt ggaccctatt atcgagatg atattctga tatactgatt gattttgtc  
72001 aagatgaaa ttactctatt ttgtttcat cacatattac aagtattta gaaaaaatg  
72061 cagattatat tacttttatt cataaaggac ggtagtttt ctgctcatta aaagacgact  
72121 taattgataa ctatggtgt gtaagttgtg gagcaagtgt cttgatac ctagataaga  
72181 cagaaattat ttctatcaa aaagaagatt atcaataaa ggttctgtt cgtgatagaa  
72241 acaagattgc aaaagattt caaaagcac ttgtagaacc tgctactatt gaaaatatta  
72301 tgtgtttta cgtaaagggg gaattacaat gaaaggctta ttgatgaaag atttattgt  
72361 aattcagaaa aatatggaa ttactagaat tattatggat atattcatta tagtagctt  
72421 gatgtattt taaaagggg caggagctat ttacattagt ttattgtta ttccagttga  
72481 aataatgaca atgataatt cctaacgac ttgcagcaa caatggaaat gggggaata  
72541 tgtgttgca ctaccgtt caaaaactac gattgtaaaa agcagatata tagttgctt

72601 gattatgact tgtattggct ttgggtagc tttgcttgtt aataccataa catatttat  
72661 attccctcaa ttgcatttg gttattatat gtttattgct tgtgcttctt ttgccgtaac  
72721 cttagtattt ttgtcatttg tattgccttc aaattattca cttggagtta atgcaggttt  
72781 tgcggttatg ttactctag tgattattct tgttgattg gcagtttga caaatgtgac  
72841 taacaattct atttatggt ttgtagtcga taattttgaa ttgagtatcg gcatagcttt  
72901 tataatagtt atagctcttg ctttcagttc ttatcttcta tcaaaagcat ttttactag  
72961 aaaatacaat tagtgaggta ttgttatgag aaaatgtctt agatgtcatg aagaaatggt  
73021 cgaaaatta gatgttaaag ttgatatgca gggatatggt attagaataa ctactaaagg  
73081 cgtttttgga actacggtag aaaaacctaa agttgcagtt tgtccaaaat gtggcgaagt  
73141 ttcttatat attgaaaatt ttaaatcaat aaaataaatg attaaaatct gcatatagac  
73201 tgagggttta ttgtttgcta acgtccgagc ggatattgaa gaatttatga atagtcata  
73261 cccagagatg caagcaaat tcaaaaggta ttttggaat agacattta cgccgaaaa  
73321 atatgtttat atcactacga aaaagcaaaa attaaatttc ttaaagaat aagggggggc  
73381 tatggataag caattatggg tattatgtcc tatttgcaat aataagacac gaactaaagt  
73441 gcgagaagat acagaactga taaatttcc tttgttctgt ccgaagtgca aaacggaac  
73501 tttaatcaat ataaagcatg gaaaagtaac tattatcaaa gagccagacg caaagacgca  
73561 gagccgataa tttgtaggtt attatgactt atagattggt ggctcttatt tgttacctgc  
73621 ggagcagatc agcaaataga taatgcagaa tagcaaaaag ggaaaacaag aagctgatta  
73681 ctcttgctc tcctgctgt tcaagatacc gtcaatcgta ccttgaatga ttttaattc  
73741 gttatcactc aataaatcaa gagaggttc tatctgacgg cgagctgtac ttttacgac  
73801 gttctctgct ggatagaaat attcatcgac cgatatattg aacatggtaa ctaaatcatg  
73861 gaataattga aactagggt gtaaccaac atttcaata tctgcgatat ggcgttctcc  
73921 atagaact ttatgccta aatcattacg agaaagcct gctctctac gggcttctc  
73981 gattgccagt ctaaaggct tgaatcaaa agtttggtt tctttgctt ttctattt  
74041 aatcaccta gcatgagtt atactcatg ctgtatattt agaatgtgtt aaaattgagc  
74101 gaatcattca attagaaaac gaaaaagaat agaatcaca atcactgtg attgtgatt  
74161 gttgatgata aaataagagt aagaagaat agaaagaagt gagtggtgtt gggaaatta  
74221 ggcgcacaaa aagcaaacg aatgataca ccaatcagtg caaaaaaaga tattatgggg  
74281 gataagacgg ttcgtgttcg tgctgactg cacatatta taaaatcga aacagcaag  
74341 aatggcggaa acgtaaaaga agttatggat aaagccttag aagaatata tcgaaatat  
74401 ttacctgaca aacttaaaa ggagtgaana tgaatggca gttacttatg aaaaacatt  
74461 tgaatatag atcattaacg aattatcggc aagcgtttat aatcgagtat taaactatg  
74521 ttgaatcat gaattaata aaaatgactc tcaattattg gaagtcaatt tattaacca  
74581 attaaagctt gcaaacgtg taaatctttt tgattattct ttagaagaat tacaagcct  
74641 tcatgagat tggcggca tgaatcgcta tcaaaaaca gtttgaata aagagaaagt  
74701 ggcttaatat ggcaaatata gtcaatttta ctgacaaaca attgaaaat cgcttaaat  
74761 ataatttaga agaattggtt caaggaaaa aagcgggtga atcgccaacc gctttttac  
74821 ttggtgggca accagggtca gggaaaacga gtttgcaag aagatgattg agcaggcagg  
74881 aacaaagtga taaattcaaa ttgtgagga aatatagat gaatcaagga agaattattg  
74941 tgattacagg ctaccgggg acaggaaaaa caacaactgc gtcaattgtc gcaaaggaat  
75001 cagatagga taaatcagtg catatgcaca ccgatgactt tttcattac ttaagcaag  
75061 gcgcaatacc accacattg ccagaatcca acaagcaaaa tctggtgtc attgaagcct  
75121 ttttagaggc tgcaaacga tatgctcgtg gcggatatga tgtaattgta gatgggattg  
75181 tcgggcatg gttttggag ccatggaaag ctcttgccca agaagattac gaggtacact

75241 atattgtatt aagagcgagt atggaaataa gacttagaag caaacttaag agtgtgttga  
75301 tagtgcagta tcttaaaatt ttgtataata ggaattgaag ttaaattaga tgctaaaaat  
75361 ttgtaattaa gaaggagtga ttacatgaac aaaaatataa aatattctca aaacttttta  
75421 acgagtgaaa aagtactcaa ccaaataata aaacaattga atttaaaaga aaccgatacc  
75481 gtttacgaaa ttggaacagg taaagggcat ttaacgacga aactggctaa aataagtaaa  
75541 caggtaacgt ctattgaatt agacagtcac ctattcaact tatcgtcaga aaaattaa  
75601 ctgaatactc gtgtcacttt aattcaccaa gatattctac agtttcaatt ccctaacaaa  
75661 cagaggtata aaattgttgg gagtattcct taccatttaa gcacacaaat tattaacaaa  
75721 gtggtttttg aaagccatgc gtctgacatc tatctgattg ttgaagaagg attctacaag  
75781 cgtaccttgg atattaccg aacactaggg ttgctcttgc aactcaagt ctcgattcag  
75841 caattgctta agctgccagc ggaatgcttt catcctaac caaaagtaaa cagtgtctta  
75901 ataaaactta cccgccatac cacagatgtt ccagataaat attggaagct atatacgtac  
75961 tttgtttcaa aatgggtcaa tcgagaatat cgtcaactgt ttactaaaa tcagtttcat  
76021 caagcaatga aacacgcaa agtaacaat ttaagtaccg ttacttatga gcaagtattg  
76081 tctattttta atagtattct attatttaac gggaggaaat aattctatga gtcgctttg  
76141 taaatttggga aagttacacg ttactaaagg gaatgtagat aaattattag gtatactact  
76201 gacagcttcc aaggagctaa agaggtcctt agcgctacg gggaatttgt atcgataagg  
76261 ggtacaaatt cccactaagc gctcgggacc cttgttagga aaatgtccta agtgtggcaa  
76321 caatattgta ttaaaaaaat cgttttatgg ttgttcaaat tctctgaat gtacctcac  
76381 ttagctgaa cattttgaa agaaaaact caccaaaaca aatgtaaaag aattactaga  
76441 gggaaaagaa accctggtaa aaggaatcaa aacgaaagat agaaagtcct acaatgccgt  
76501 tgtaaaaatc ggagaaaagg gatatttga tttatctct tttcaaaat aagcataaaa  
76561 gccctttaa gagggctttt atatattaat cacaaatcac ttatcacaaa tcacaagtga  
76621 ttaacacaa atcacttgtg atttgtgatt cctaatgata caatattact atacaaaaa  
76681 agaatggggc gtagttatgg agaaggaaga actcaaaata ctgaagaat taagacgtat  
76741 ttaaacagt aaaaatgaag cgattgttat cttaaacaat tattttaaag gtgggttgg  
76801 aaagtcaaaa ttatcgacta tgtttgctta ctgacagac aaatttaatt taaaagttt  
76861 aatgatcgat aaggacttac aagcaacatt gacaaaagac ttagcaaaaa catttaaggt  
76921 agaattgcca cgtgttaatt ttatgaagg actgaaaaat ggaaactgg cttcttctat  
76981 tgttcatttg actgataatt tagacttgat ccctggcacg tttgatttga tgttactgcc  
77041 aaaattaact cgctcatgga cttttgaaaa tgaaagtaga ttgcttgcta ctcttttagc  
77101 acctttaaaa agtgactatg atctcattat tattgatact gtaccaacgc caagcgttta  
77161 tacaataat gcaatcgtgg caagtgatta cgtcatgac ctttacaag cagaagaaga  
77221 aagtacaaac aacattcaa actatatttc ctatttgatt gatttacaag aacagttta  
77281 ccctggacta gatatgatcg gttttgttcc ttatttagtt gatacggaca gcacaacgat  
77341 aaaatcaaac ctggaagaac tgtacaagca acataaagaa gataactgg ttttcaaaa  
77401 tattatcaag cgaagtaata aagtaagtac ctggctctaaa aacggcatta cagaacacaa  
77461 aggctatgac aaaaaagttt tatctatgta tgagaacgta tttttgaaa tgcttgcata  
77521 tagtatgcag taataattca aaagctgtta tcgtgtcgg taaataaaaa aaaccgttcc  
77581 tagataatac acttttgc gtcttgaaaa ataacgggac ggttttggat ataaccagaa  
77641 ctgtcctttt ttcttaggag taaataaggc atagctctgg ttaaaggggg ctataccatg  
77701 attgatacgc gaagaacgtt ctgccgttct caactgaata aatatttcag tccactatta  
77761 caatcattac accctttaca agaattaaaa attcatatca atagaattta taaaacagtc  
77821 tgtttgtgta attacacatt atcgggctgt tttgtttg ttaaaaattt tttcaactt

77881 ttttcggttt caacttagca aatcacacct gtcgttcct atatggtgcg gaaagagga  
77941 taaccacttt tcatatcgta acggaaaggg ggtgagattg atgaaacat ctgacttcca  
78001 gaaaacagtt caatgccgtt ttgaaagttg tttgaagaaa gttgtccgac atgttgtaa  
78061 ggactatcag aagaaattaa agcgcagaca aaagggagaa acgcttttt gtgaactcc  
78121 agaaatcgtt gtagaaaatc tggctgtctg ggacgactat gatacggact atacgatttt  
78181 caatgtatgt gtagtgata ttcgtatttg tgatgatgaa ctggcagaag ccttgaaca  
78241 tttgtctgag cgtaatcgag aaaatttgtt gatgtattat ttcttgaaa tgagcgatac  
78301 cgagattgca aaaagacaaa atatttcaag aagtgggtt tttcaaaacc gacacaattc  
78361 actagagctt atgaaaaaaa tactaaagga gaaatgatag caaatgaaac acacaatgaa  
78421 gaagccgtcc tactacttgc tttcgcaggc aatggacggg gacgaaaaag cgattgaaaa  
78481 gatactggca tttatgacc ctacatatac aaagtgtgt ctacgaccac tctatgatga  
78541 atacggcaat gtctatattg ttgtagatat ggaattaaag ggacttatca gagaagcact  
78601 tattaanaatg attttaggtt ttgatattgc ctagaaatc gaagaagaat aacaagcagt  
78661 aaccgcagag catgatttgc tcaatcccct ctttctgct ctgccctgc ttttatatga  
78721 aagcaacacg ctttcgccac agctctttga caactgaata aagcagacag atacgtttgt  
78781 gagatagcga gccacgggaa ctgtaccca cgacctttc aaaagaaagc gagcgacca  
78841 cgcagtgatc cgagagcgc tgttgaaaa gtcgtttgc catgacctat cctcacagaa  
78901 taatgatagc tccgatggt gcggttctgc ccacaagaat gggaatagtt gagatactaa  
78961 cggagctttc caaagccgct tgctgctta taattgatag tttcagcaac aaaatctatc  
79021 tactcttttt attaggtgt gttataatga cttattaga cgagtgtatt ttgttctgt  
79081 cacaaatgaa aggggtctta atagtgataa gtgatacaca aaatgcaca tctctacaa  
79141 aggaaaaaaa gactataca gtagaggaaa ttgctgaaca actggacatt agcaaaaagg  
79201 tagcttattc attagtaaaa agcggtaaat tcagttatgt tcgtgctggt aaagccatac  
79261 gggatcaaaa gtttctttc gataaatggt taaatgaaat ttaactataa ggagagaaaa  
79321 ttatggcttc aatcaaaaa agaaaaatca gttttcagt ttttattgg tacttagata  
79381 gtgcaggaga aagaaaaaa aatgggaca cgctggaac aagaaaaaa gcaaaacagc  
79441 gaaaagcctt tatagaatac tatcaagaga aatttgata tgtgatagtt ccattagagg  
79501 aacaatttgc acatcagatt gaaaattcta aaaaggagtt agatgttgta gacaaagata  
79561 ttacattgag tgatttcta gaaattttg ttaattata tggcacatct aatggctgc  
79621 cgagtacatt tagtagtaag gtaggcagta ttgaaaatta tatcaatccg attattggag  
79681 attgaaact gaatgaaata actacaaaa gtctatcaaa atactacaat gattattga  
79741 gcgttcaga agtaccagc gcaaacagaa aagcaactgg tcgttggtt caaccagca  
79801 acatcaaaaa aatacatgat attatccgct gtgccttaa tcaagctatc cgctgggagt  
79861 atattgatac aaacaaaaga aacctgcgt ctttggtac gttacaaaa attcaaaga  
79921 ctaggcgaaa agtgggagt gttcaaacat ttcgagaagc ggtaaaagcc acggaagatg  
79981 attgctttc aattgtatg cacttagctt tttctgctc tatgcaatt ggagaaatta  
80041 caggacttac atgggaagat gttattattg atgaagagtc cattgtaca aataatgcaa  
80101 aggtaatcat caataaagaa cttcaagag taaatgcaga agctatgcag aaattaaagg  
80161 aaaaggatat ttaaagatt ttccaacgc aaaaaccgca ttgtaccaca aggcttct  
80221 tgaacgcc aaaaacagaa acaagtaatc gtgttctg gttacctaa acagttgagg  
80281 aactattggt gcaatataaa aaagaccagc aggaattaa ggaatttta ggaagtgcct  
80341 acaatgatta caacctgtt attgcgttg ataatggcaa tcccgtggaa agccgtattg  
80401 ttagagatag gttcaaaag ctctgtgaag aaaacgatta tgaagttgt gtattcaca  
80461 gcctacgcca ttaagtacg gttataaac tcaaatgac aaacggagat gtaagtccg

80521 tacaaggcga tactggtcac gcagaagcag aaatggttac agatgtatat tcagaaatca  
80581 ttgacgagga cagacgtttc aatgcacaaa aaatggataa agaattttat tctacgctta  
80641 atgatgatac agacaatcca aagcaagata ccgacttaac cgatagtgat atggcgttat  
80701 tggaactgat taaatcttta tcgccagaaa tgaagagca attttaaaag caggcacttc  
80761 aaagatagaa tttcaaaagt gttagcaaat tcaaaaaaaaa ccagcgattt ttcttcaaaa  
80821 ataaaaaagt gttagcaagc ctatttcctt aaaagtctta aaaaaatc gaataaaaa  
80881 tgacagattg aaaacaattc gtattcagcg taaatagaaa gccataaata aagaaacgct  
80941 gaaaaccttg taaaataagg ctttcagcgg agtttgggc gtcccagaca

//

DEFINITION Integrative and mobilisable element IME\_1

fasta\_record 1..122003

/ID=B40|SC|contig000001

/colour=5

CDS 164..367

/ID=B40\_02170

/color=1

/locus\_tag="B40\_02170"

/note="hypothetical protein"

/product="hypothetical protein"

/protein\_id="gnl|SC|B40\_02170"

/codon\_start=1

CDS 371..727

/ID=B40\_02171

/color=1

/locus\_tag="B40\_02171"

/note="hypothetical protein"

/product="hypothetical protein"

/protein\_id="gnl|SC|B40\_02171"

/codon\_start=1

CDS 745..2586

/color=10

/locus\_tag="B40\_02172"

/note="Replication initiation protein RepA, protein

motif:CLUSTERS:PRK11823 protein motif:Pfam:PF09250.5"

/product="Replication initiation protein RepA

[replication]"

/"ID=B40\_02172

/gene="repA""

/protein\_id="gnl|SC|B40\_02172"

/codon\_start=1

CDS 2779..3141

/ID=B40\_02173

/color=1

/locus\_tag="B40\_02173"

/note="hypothetical protein"  
 /product="hypothetical protein"  
 /protein\_id="gnl|SC|B40\_02173"  
 /codon\_start=1  
 CDS        3110..3460  
 /ID=B40\_02174  
 /color=10  
 /locus\_tag="B40\_02174"  
 /note="replication initiation protein RepA"  
 /product="Replication initiation protein RepA  
 [replication]"  
 /protein\_id="gnl|SC|B40\_02174"  
 /gene="repA"  
 /codon\_start=1  
 CDS        3532..4704  
 /color=7  
 /locus\_tag="B40\_02175"  
 /note="RNA polymerase sigma factor Sigma-70 region 2,  
 similar to AA sequence:UniProtKB:P77994 protein  
 motif:CLUSTERS:PRK05901 protein motif:TIGRFAMs:TIGR02393  
 protein motif:Pfam:PF04542.8"  
 /product="RNA polymerase sigma factor Sigma-70 region 2  
 [transcriptional regulator]"  
 /ID=B40\_02175  
 /protein\_id="gnl|SC|B40\_02175""  
 /codon\_start=1  
 CDS        5132..5782  
 /ID=B40\_02176  
 /color=1  
 /locus\_tag="B40\_02176"  
 /note="hypothetical protein"  
 /product="hypothetical protein"  
 /protein\_id="gnl|SC|B40\_02176"  
 /codon\_start=1  
 CDS        5932..6417  
 /ID=B40\_02177  
 /color=7  
 /locus\_tag="B40\_02177"  
 /note="helix-turn-helix [transcriptional regulator]"  
 /product="helix-turn-helix [transcriptional regulator]"  
 /protein\_id="gnl|SC|B40\_02177"  
 /codon\_start=1  
 CDS        complement(6735..7280)  
 /color=8



```

/locus_tag="B40_02178"
/note="Uma2 family endonuclease, protein motif:Cdd:COG4636
protein motif:Pfam:PF05685.6"
/product="Uma2 family endonuclease [restriction
modification]"
/ID=B40_02178
/protein_id="gnl|SC|B40_02178"
/codon_start=1
CDS      7994..8269
/ID=B40_02179
/color=8
/locus_tag="B40_02179"
/note="putative phage-type endonuclease"
/product="Putative phage-type endonuclease [restriction
modification]"
/protein_id="gnl|SC|B40_02179"
/codon_start=1
CDS      8379..8852
/ID=B40_02180
/color=1
/locus_tag="B40_02180"
/note="hypothetical protein"
/product="hypothetical protein"
/protein_id="gnl|SC|B40_02180"
/codon_start=1
CDS      8941..9234
/ID=B40_02181
/color=1
/locus_tag="B40_02181"
/note="hypothetical protein"
/product="hypothetical protein"
/protein_id="gnl|SC|B40_02181"
/codon_start=1
CDS      9270..9665
/ID=B40_02182
/color=1
/locus_tag="B40_02182"
/note="hypothetical protein"
/product="hypothetical protein"
/protein_id="gnl|SC|B40_02182"
/codon_start=1
CDS      9653..9832
/ID=B40_02183
/color=1

```

/locus\_tag="B40\_02183"  
 /note="hypothetical protein"  
 /product="hypothetical protein"  
 /protein\_id="gnl|SC|B40\_02183"  
 /codon\_start=1  
 CDS 9905..10171  
 /ID=B40\_02184  
 /color=1  
 /locus\_tag="B40\_02184"  
 /note="hypothetical protein"  
 /product="hypothetical protein"  
 /protein\_id="gnl|SC|B40\_02184"  
 /codon\_start=1  
 CDS 10337..10582  
 /ID=B40\_02185  
 /color=1  
 /locus\_tag="B40\_02185"  
 /note="hypothetical protein"  
 /product="hypothetical protein"  
 /protein\_id="gnl|SC|B40\_02185"  
 /codon\_start=1  
 CDS 10594..10881  
 /ID=B40\_02186  
 /color=9  
 /locus\_tag="B40\_02186"  
 /note="tyrosine-type recombinase"  
 /product="Tyrosine-type recombinase [recombinase]"  
 /protein\_id="gnl|SC|B40\_02186"  
 /codon\_start=1  
 CDS 11079..12212  
 /ID=B40\_02187  
 /color=7  
 /locus\_tag="B40\_02187"  
 /note="Helix-turn-helix domain DNA-binding protein  
 conjugative transposon protein"  
 /product="Helix-turn-helix domain DNA-binding protein  
 conjugative transposon protein [transcriptional  
 regulator]"  
 /protein\_id="gnl|SC|B40\_02187"  
 /codon\_start=1  
 CDS 12230..12442  
 /ID=B40\_02188  
 /color=1  
 /locus\_tag="B40\_02188"

/DUF5348=containing  
 /DUF5348=protein  
 /DUF5348=conugative  
 /DUF5348=transposon  
 /DUF5348=protein  
 /note="hypothetical protein"  
 /product="hypothetical protein DUF5348 containing protein  
 conugative transposon protein"  
 /protein\_id="gnl|SC|B40\_02188"  
 /codon\_start=1  
 CDS 12486..12962  
 /color=1  
 /locus\_tag="B40\_02189"  
 /note="PcfB family protein DUF3801 domain-containing  
 protein conjugative transposon protein, protein  
 motif:Pfam:PF12687.1"  
 /product="PcfB family protein DUF3801 domain-containing  
 protein conjugative transposon protein"  
 /"ID=B40\_02189  
 /protein\_id="gnl|SC|B40\_02189""  
 /codon\_start=1  
 CDS 12959..14506  
 /color=4  
 /locus\_tag="B40\_02190"  
 /note="Type IV secretory systeim protein TraG VirD4  
 components, protein motif:CLUSTERS:PRK13876 protein  
 motif:Cdd:COG3505 protein motif:TIGRFAMs:TIGR02759 protein  
 motif:Pfam:PF02534.8"  
 /product="Type IV secretory systeim protein TraG VirD4  
 components [coupling protein]"  
 /"ID=B40\_02190  
 /protein\_id="gnl|SC|B40\_02190""  
 /gene="traG"  
 /codon\_start=1  
 CDS 14597..14974  
 /ID=B40\_02191  
 /color=9  
 /locus\_tag="B40\_02191"  
 /note="transposon-encoded TnpV family protein"  
 /product="Transposon-encoded TnpV family protein"  
 /protein\_id="gnl|SC|B40\_02191"  
 /gene="tnpV"  
 /codon\_start=1  
 CDS 14985..15176

/ID=B40\_02192  
 /color=1  
 /locus\_tag="B40\_02192"  
 /note="hypothetical protein"  
 /product="hypothetical protein"  
 /protein\_id="gnl|SC|B40\_02192"  
 /codon\_start=1  
 CDS      complement(15196..16239)

/ID=B40\_02193  
 /color=1  
 /locus\_tag="B40\_02193"  
 /note="hypothetical protein"  
 /product="hypothetical protein"  
 /protein\_id="gnl|SC|B40\_02193"  
 /codon\_start=1  
 CDS      16571..16795

/color=7  
 /locus\_tag="B40\_02194"  
 /note="Helix-turn-helix domain-containing protein  
 Excisionase family DNA-binding domain, protein  
 motif: Pfam:PF12728.1"  
 /product="Helix-turn-helix domain-containing protein  
 Excisionase family DNA-binding domain [transcriptional  
 regulator]"  
 /ID=B40\_02194  
 /protein\_id="gnl|SC|B40\_02194"  
 /codon\_start=1  
 CDS      16911..17117

/ID=B40\_02195  
 /color=1  
 /locus\_tag="B40\_02195"  
 /note="hypothetical protein"  
 /product="hypothetical protein"  
 /protein\_id="gnl|SC|B40\_02195"  
 /codon\_start=1  
 CDS      17178..18686

/ID=B40\_02196  
 /color=1  
 /locus\_tag="B40\_02196"  
 /note="SRRM2 serine/arginine repetitive matrix protein"  
 /product="SRRM2 %28serine/arginine repetitive matrix  
 protein 2%29"  
 /protein\_id="gnl|SC|B40\_02196"  
 /codon\_start=1

CDS 18702..19388  
 /color=10  
 /locus\_tag="B40\_02197"  
 /note="DNA primase, similar to AA  
 sequence:UniProtKB:P0ABS5 protein motif:CLUSTERS:PRK05667  
 protein motif:Cdd:COG0358 protein motif:TIGRFAMs:TIGR01391  
 protein motif:Pfam:PF01807.14"  
 /product="DNA primase [RNA polymerase]"  
 /"ID=B40\_02197  
 /protein\_id="gnl|SC|B40\_02197""  
 /codon\_start=1

CDS 19348..20706  
 /color=8  
 /locus\_tag="B40\_02198"  
 /note="Virulence-associated protein E, protein  
 motif:Cdd:COG5545 protein motif:Pfam:PF05272.5"  
 /product="Virulence-associated protein E [virulence]"  
 /"ID=B40\_02198  
 /protein\_id="gnl|SC|B40\_02198""  
 /codon\_start=1

CDS 20974..21201  
 /ID=B40\_02199  
 /color=1  
 /locus\_tag="B40\_02199"  
 /note="hypothetical protein"  
 /product="hypothetical protein"  
 /protein\_id="gnl|SC|B40\_02199"  
 /codon\_start=1

CDS 21214..22863  
 /ID=B40\_02200  
 /color=9  
 /locus\_tag="B40\_02200"  
 /note="protein motif:Pfam:PF00239.15"  
 /product="Serine recombinase [recombinase]"  
 /protein\_id="gnl|SC|B40\_02200"  
 /codon\_start=1

CDS complement(22934..23854)  
 /color=7  
 /locus\_tag="B40\_02201"  
 /note="AraC family transcriptional regulator  
 helix-turn-helix domain, protein motif:CLUSTERS:PRK10572  
 protein motif:Cdd:COG2169 protein motif:TIGRFAMs:TIGR04094  
 protein motif:Pfam:PF12833.1"  
 /product="AraC family transcriptional regulator

helix-turn-helix domain [transcriptional regulator]"  
 /"ID=B40\_02201  
 /protein\_id="gnl|SC|B40\_02201""  
 /codon\_start=1  
 CDS 24070..25083  
 /color=8  
 /locus\_tag="B40\_02202"  
 /note="ABC transporter substrate-binding protein yclQ,  
 similar to AA sequence:UniProtKB:P94421 protein  
 motif:CLUSTERS:PRK10957 protein motif:Cdd:COG4594 protein  
 motif:Pfam:PF01497.12"  
 /product="ABC transporter substrate-binding protein yclQ  
 [transporter]"  
 /"ID=B40\_02202  
 /protein\_id="gnl|SC|B40\_02202""  
 /gene="yclQ"  
 /codon\_start=1  
 CDS 25049..26122  
 /color=8  
 /locus\_tag="B40\_02203"  
 /note="Iron-uptake system permease protein FeuB iron ABC  
 transporter permease, similar to AA  
 sequence:UniProtKB:P40410 protein motif:CLUSTERS:PRK10577  
 protein motif:Cdd:COG0609 protein motif:TIGRFAMs:TIGR03869  
 protein motif:Pfam:PF01032.12"  
 /product="Iron-uptake system permease protein FeuB iron  
 ABC transporter permease [transporter]"  
 /"ID=B40\_02203  
 /protein\_id="gnl|SC|B40\_02203""  
 /gene="feuB"  
 /codon\_start=1  
 CDS 26119..27114  
 /color=8  
 /locus\_tag="B40\_02204"  
 /note="Iron-uptake system permease protein FeuC iron ABC  
 transporter permease, similar to AA  
 sequence:UniProtKB:P40411 protein motif:CLUSTERS:PRK10577  
 protein motif:Cdd:COG0609 protein motif:TIGRFAMs:TIGR03869  
 protein motif:Pfam:PF01032.12"  
 /product="Iron-uptake system permease protein FeuC iron  
 ABC transporter permease [transporter]"  
 /"ID=B40\_02204  
 /protein\_id="gnl|SC|B40\_02204""  
 /gene="feuC"

CDS        /codon\_start=1  
           27128..27940  
           /color=8  
           /locus\_tag="B40\_02205"  
           /note="Iron dicitrate ABC transporter ATP-binding  
           protein, similar to AA sequence:UniProtKB:O32188 protein  
           motif:CLUSTERS:PRK11231 protein motif:Cdd:COG4604 protein  
           motif:TIGRFAMs:TIGR03873 protein motif:Pfam:PF00005.21"  
           /product="Iron dicitrate ABC transporter ATP-binding  
           protein [transporter]"  
           /"ID=B40\_02205  
           /protein\_id="gnl|SC|B40\_02205""  
 CDS        /codon\_start=1  
           28083..29861  
           /color=8  
           /locus\_tag="B40\_02206"  
           /eC\_number=3.6.3.-  
           /note="Iron import ATP-binding/permease protein IrtA,  
           similar to AA sequence:UniProtKB:P63391 protein  
           motif:CLUSTERS:PRK13657 protein motif:Cdd:COG2274 protein  
           motif:TIGRFAMs:TIGR02204 protein motif:Pfam:PF00005.21"  
           /product="Iron import ATP-binding/permease protein IrtA  
           [transporter]"  
           /"ID=B40\_02206  
           /protein\_id="gnl|SC|B40\_02206""  
           /gene="irtA"  
           /codon\_start=1  
 CDS        29858..31606  
           /color=8  
           /locus\_tag="B40\_02207"  
           /note="Putative multidrug export ATP-binding/permease  
           protein SAV1866, similar to AA sequence:UniProtKB:Q99T13  
           protein motif:CLUSTERS:PRK13657 protein motif:Cdd:COG2274  
           protein motif:TIGRFAMs:TIGR02203 protein  
           motif:Pfam:PF00664.17"  
           /product="Putative multidrug export ATP-binding/permease  
           protein SAV1866 [transporter]"  
           /"ID=B40\_02207  
           /protein\_id="gnl|SC|B40\_02207""  
           /codon\_start=1  
 CDS        32071..32439  
           /color=8  
           /locus\_tag="B40\_02208"  
           /note="MN-binding protein fumarate reductase flavoprotein

subunit, protein motif:Cdd:COG4659 protein  
motif:TIGRFAMs:TIGR01947 protein motif:Pfam:PF04205.8"  
/product="FMN-binding protein fumarate reductase  
flavoprotein subunit"  
/ID=B40\_02208  
/protein\_id="gnl|SC|B40\_02208""  
/codon\_start=1  
CDS 32795..33034  
/ID=B40\_02209  
/color=4  
/locus\_tag="B40\_02209"  
/note="TraM recognition domain-containing protein type IV  
secretory system conjugative DNA transfer family protein"  
/product="TraM recognition domain-containing protein type  
IV secretory system conjugative DNA transfer family  
protein [relaxosome]"  
/protein\_id="gnl|SC|B40\_02209"  
/codon\_start=1  
CDS 33099..33239  
/color=1  
/locus\_tag="B40\_02210"  
/note="Maff2 family protein, protein motif:Pfam:PF12750.1"  
/product="Maff2 family protein"  
/ID=B40\_02210  
/protein\_id="gnl|SC|B40\_02210""  
/codon\_start=1  
CDS 33389..34429  
/color=7  
/locus\_tag="B40\_02211"  
/note="Transcriptional repressor DicA helix-turn-helix,  
protein motif:CLUSTERS:PRK09706 protein motif:Cdd:COG3800  
protein motif:TIGRFAMs:TIGR03070 protein  
motif:Pfam:PF12844.1"  
/product="Transcriptional repressor DicA helix-turn-helix  
[transcriptional regulator]"  
/ID=B40\_02211  
/protein\_id="gnl|SC|B40\_02211""  
/codon\_start=1  
CDS 34596..35039  
/color=7  
/locus\_tag="B40\_02212"  
/note="RNA polymerase sigma factor Sigma-70 region 4,  
protein motif:CLUSTERS:PRK11924 protein  
motif:TIGRFAMs:TIGR02937 protein motif:Pfam:PF08281.6"



/product="RNA polymerase sigma factor Sigma-70 region 4  
 [transcriptional regulator]"  
 /"ID=B40\_02212  
 /protein\_id="gnl|SC|B40\_02212""  
 /codon\_start=1  
 CDS 35032..35232  
 /color=7  
 /locus\_tag="B40\_02213"  
 /note="helix-turn-helix domain-containing protein, protein  
 motif: Pfam:PF12645.1"  
 /product="helix-turn-helix domain-containing protein  
 [transcriptional regulator]"  
 /"ID=B40\_02213  
 /protein\_id="gnl|SC|B40\_02213""  
 /codon\_start=1  
 CDS 35288..35659  
 /ID=B40\_02214  
 /color=1  
 /locus\_tag="B40\_02214"  
 /note="hypothetical protein"  
 /product="hypothetical protein"  
 /protein\_id="gnl|SC|B40\_02214"  
 /codon\_start=1  
 CDS 36276..36671  
 /ID=B40\_02215  
 /color=4  
 /locus\_tag="B40\_02215"  
 /note="plasmid mobilization relaxosome protein MobC"  
 /product="Plasmid mobilization relaxosome protein MobC  
 [relaxosome]"  
 /protein\_id="gnl|SC|B40\_02215"  
 /gene="mobC"  
 /codon\_start=1  
 CDS 36634..38265  
 /color=4  
 /locus\_tag="B40\_02216"  
 /note="Relaxase/Mobilisation nuclease domain , protein  
 motif: Pfam:PF03432.8"  
 /product="Relaxase/Mobilisation nuclease domain  
 [relaxase]"  
 /"ID=B40\_02216  
 /protein\_id="gnl|SC|B40\_02216""  
 /codon\_start=1  
 CDS 38450..38662

/ID=B40\_02217  
 /color=1  
 /locus\_tag="B40\_02217"  
 /note="hypothetical protein"  
 /product="hypothetical protein"  
 /protein\_id="gnl|SC|B40\_02217"  
 /codon\_start=1  
 CDS 38652..39395  
 /color=10  
 /locus\_tag="B40\_02218"  
 /note="phage replisome organizer N-terminal region,  
 protein motif:TIGRFAMs:TIGR01714 protein  
 motif: Pfam:PF09681.4"  
 /product="phage replisome organizer N-terminal region  
 [replication]"  
 /"ID=B40\_02218  
 /protein\_id="gnl|SC|B40\_02218""  
 /codon\_start=1  
 CDS 39392..40249  
 /color=10  
 /locus\_tag="B40\_02219"  
 /note="Primosomal protein Dnal ATP binding protein,  
 similar to AA sequence:UniProtKB:P06567 protein  
 motif:CLUSTERS:PRK08116 protein motif:Cdd:COG1484 protein  
 motif: Pfam:PF01695.11"  
 /product="Primosomal protein Dnal ATP binding protein  
 [replication]"  
 /"ID=B40\_02219  
 /protein\_id="gnl|SC|B40\_02219""  
 /gene="dnal"  
 /codon\_start=1  
 CDS 40246..40434  
 /ID=B40\_02220  
 /color=9  
 /locus\_tag="B40\_02220"  
 /note="transposon-encoded protein:"  
 /product="Transposon-encoded protein TnpW"  
 /protein\_id="gnl|SC|B40\_02220"  
 /gene="tnpW"  
 /codon\_start=1  
 CDS 40546..40746  
 /ID=B40\_02221  
 /color=9  
 /locus\_tag="B40\_02221"

```

    /note="Serine recombinase TnpX"
    /product="Serine recombinase TnpX [recombinase]"
    /protein_id="gnl|SC|B40_02221"
    /gene="tnpX"
    /codon_start=1
CDS    complement(40739..42412)
    /color=9
    /locus_tag="B40_02222"
    /note="Serine recombinase, protein motif: Pfam:PF00239.15"
    /product="Serine recombinase [recombinase]"
    /"ID=B40_02222
    /protein_id="gnl|SC|B40_02222""
    /codon_start=1
CDS    complement(42490..42663)
    /ID=B40_02223
    /color=9
    /locus_tag="B40_02223"
    /note="Transposon-encoded protein TnpW"
    /product="Transposon-encoded protein TnpW"
    /protein_id="gnl|SC|B40_02223"
    /gene="tnpW"
    /codon_start=1
CDS    complement(43122..43364)
    /color=7
    /locus_tag="B40_02224"
    /note="helix-turn-helix domain-containing protein, protein
    motif: Pfam:PF12645.1"
    /product="helix-turn-helix domain-containing protein
    [transcriptional regulator]"
    /"ID=B40_02224
    /protein_id="gnl|SC|B40_02224""
    /codon_start=1
CDS    complement(43348..43785)
    /color=7
    /locus_tag="B40_02225"
    /note="RNA polymerase sigma factor Sigma-70 region 4,
    protein motif: CLUSTERS:PRK11924 protein
    motif: TIGRFAMs:TIGR02937 protein motif: Pfam:PF08281.6"
    /product="RNA polymerase sigma factor Sigma-70 region 4
    [transcriptional regulator]"
    /"ID=B40_02225
    /protein_id="gnl|SC|B40_02225""
    /codon_start=1
CDS    complement(44259..45242)

```

/color=8  
 /locus\_tag="B40\_02226"  
 /eC\_number=2.1.1.192  
 /note="23S rRNA adenine 2503 methyl transferase RlmN,  
 similar to AA sequence:UniProtKB:Q7A600 protein  
 motif:CLUSTERS:PRK14469 protein motif:TIGRFAMs:TIGR00048  
 protein motif:Pfam:PF04055.15"  
 /product="23S rRNA  
 %28adenine%282503%29-C%282%29%29-methyltransferase RlmN  
 [methyltransferase]"  
 /"ID=B40\_02226  
 /protein\_id="gnl|SC|B40\_02226""  
 /gene="rlmN"  
 /codon\_start=1  
 CDS 45843..46199  
 /color=7  
 /locus\_tag="B40\_02227"  
 /note="helix-turn-helix, protein motif:CLUSTERS:PRK08154  
 protein motif:Cdd:COG3800 protein motif:Pfam:PF12844.1"  
 /product="helix-turn-helix [transcriptional regulator]"  
 /"ID=B40\_02227  
 /protein\_id="gnl|SC|B40\_02227""  
 /codon\_start=1  
 CDS 46401..46730  
 /color=4  
 /locus\_tag="B40\_02228"  
 /note="Plasmid mobilization relaxosome protein MobC,  
 protein motif:Pfam:PF05713.5"  
 /product="Plasmid mobilization relaxosome protein MobC  
 [relaxosome]"  
 /"ID=B40\_02228  
 /protein\_id="gnl|SC|B40\_02228""  
 /gene="mobC"  
 /codon\_start=1  
 CDS 46691..48025  
 /color=4  
 /locus\_tag="B40\_02229"  
 /note="Relaxase/Mobilisation nuclease domain, protein  
 motif:Pfam:PF03432.8"  
 /product="Relaxase/Mobilisation nuclease domain  
 [relaxase]"  
 /"ID=B40\_02229  
 /protein\_id="gnl|SC|B40\_02229""  
 /codon\_start=1

CDS        complement(48227..48436)  
           /ID=B40\_02230  
           /color=4  
           /locus\_tag="B40\_02230"  
           /note="putative tranposon-transfer assisting protein  
           TTRAP"  
           /product="Putative tranposon-transfer assisting protein  
           TTRAP"  
           /protein\_id="gnl|SC|B40\_02230"  
           /codon\_start=1

CDS        complement(48441..51788)  
           /color=4  
           /locus\_tag="B40\_02231"  
           /note="Antirestriction protein ArdA, protein  
           motif: Pfam:PF07275.5"  
           /product="Antirestriction protein ArdA [anti-ristriction  
           modification]"  
           /"ID=B40\_02231  
           /protein\_id="gnl|SC|B40\_02231""  
           /gene="ardA"  
           /codon\_start=1

CDS        complement(51914..52282)  
           /ID=B40\_02232  
           /color=4  
           /locus\_tag="B40\_02232"  
           /note="conjugal transfer protein Cysteine-rich VLP"  
           /product="conjugal transfer protein Cysteine-rich VLP"  
           /protein\_id="gnl|SC|B40\_02232"  
           /codon\_start=1

CDS        complement(52279..54354)  
           /color=10  
           /locus\_tag="B40\_02233"  
           /eC\_number=5.99.1.2  
           /note="Type IA DNA topoisomerase, similar to AA  
           sequence: UniProtKB:P14294 protein motif: CLUSTERS:PRK07726  
           protein motif: Cdd:COG0550 protein motif: TIGRFAMs:TIGR01056  
           protein motif: Pfam:PF01131.14"  
           /product="Type IA DNA topoisomerase [topoisomerase]"  
           /"ID=B40\_02233  
           /protein\_id="gnl|SC|B40\_02233""  
           /codon\_start=1

CDS        complement(54351..55100)  
           /color=1  
           /locus\_tag="B40\_02234"

```

/note="hypothetical protein, DUF4366 containing protein"
/product="hypothetical protein DUF4366 containing
protein"
/"ID=B40_02234
/protein_id="gnl|SC|B40_02234""
/codon_start=1
CDS    complement(55090..55356)
/ID=B40_02235
/color=1
/locus_tag="B40_02235"
/note="hypothetical protein DUF4315 containing protein"
/product="hypothetical protein DUF4315 containing
protein"
/protein_id="gnl|SC|B40_02235"
/codon_start=1
CDS    complement(55363..56085)
/color=8
/locus_tag="B40_02236"
/note="phosphoadenosine phosphosulfate reductase, protein
motif:CLUSTERS:PRK13794 protein motif:Cdd:COG5270"
/product="phosphoadenosine phosphosulfate reductase
[reductase]"
/"ID=B40_02236
/protein_id="gnl|SC|B40_02236""
/codon_start=1
CDS    complement(56099..58069)
/color=8
/locus_tag="B40_02237"
/eC_number=3.4.19.11
/note="D-gamma-glutamyl-meso-diaminopimelic acid
endopeptidase CwIS , similar to AA
sequence:UniProtKB:O31852 protein motif:CLUSTERS:PRK13914
protein motif:Cdd:COG3584 protein motif:TIGRFAMs:TIGR02594
protein motif:Pfam:PF00877.13"
/product="D-gamma-glutamyl-meso-diaminopimelic acid
endopeptidase CwIS [pepidase]"
/"ID=B40_02237
/protein_id="gnl|SC|B40_02237""
/gene="cwIS"
/codon_start=1
CDS    complement(58066..59022)
/color=8
/locus_tag="B40_02238"
/eC_number=2.1.1.72

```

/note="Adenine specific DNA methyltransferase, similar to  
 AA sequence:UniProtKB:P09358 protein  
 motif:CLUSTERS:PRK11524 protein motif:Cdd:COG2189 protein  
 motif:Pfam:PF01555.12"  
 /product="Adenine specific DNA methyltransferase  
 [methyltransferase]"  
 /"ID=B40\_02238  
 /protein\_id="gnl|SC|B40\_02238""  
 /codon\_start=1  
 CDS        complement(59019..61415)  
 /color=4  
 /note="Type IV secretory system protein TraC VirB4  
 components AAA domain, protein motif:Cdd:COG3451 protein  
 motif:TIGRFAMs:TIGR02746 protein  
 motif:Pfam:PF12846.1locus\_tag=B40\_02239product=Conjugal"  
 /product="Type IV secretory system protein TraC VirB4  
 components AAA domain [ATPase mating pair formation]"  
 /"ID=B40\_02239  
 /gene="traC""  
 /protein\_id="gnl|SC|B40\_02239"  
 /codon\_start=1  
 CDS        complement(61375..61767)  
 /color=4  
 /locus\_tag="B40\_02240"  
 /note="PrgI family protein Type IV secretion system,  
 protein motif:Pfam:PF12666.1"  
 /product="PrgI family protein Type IV secretion system"  
 /"ID=B40\_02240  
 /protein\_id="gnl|SC|B40\_02240""  
 /codon\_start=1  
 CDS        complement(61769..62317)  
 /color=8  
 /locus\_tag="B40\_02241"  
 /note="Transcriptional activator adenine-specific DNA  
 methyltransferase, protein motif:Cdd:COG4725 protein  
 motif:Pfam:PF05063.8"  
 /product="Transcriptional activator adenine-specific DNA  
 methyltransferase [methyltransferase]"  
 /"ID=B40\_02241  
 /protein\_id="gnl|SC|B40\_02241""  
 /codon\_start=1  
 CDS        complement(62328..63191)  
 /ID=B40\_02242  
 /color=1

```

/locus_tag="B40_02242"
/note="hypothetical protein membrane protein putative
conjugative transposon protein"
/product="hypothetical protein membrane protein putative
conjugative transposon protein"
/protein_id="gnl|SC|B40_02242"
/codon_start=1
CDS    complement(63448..65058)
/color=9
/locus_tag="B40_02243"
/note="Serine recombinase, protein motif: Pfam:PF07508.7"
/product="Serine recombinase [recombinase]"
/"ID=B40_02243
/protein_id="gnl|SC|B40_02243""
/codon_start=1
CDS    complement(65159..65341)
/ID=B40_02244
/color=9
/locus_tag="B40_02244"
/note="transposon-encoded protein TnpW"
/product="Transposon-encoded protein TnpW"
/protein_id="gnl|SC|B40_02244"
/gene="tnpW"
/codon_start=1
CDS    complement(65338..66195)
/color=10
/locus_tag="B40_02245"
/note="Primosomal protein Dnal ATP binding protein,
similar to AA sequence: UniProtKB:P06567 protein
motif: CLUSTERS:PRK08116 protein motif: Cdd:COG1484 protein
motif: Pfam:PF01695.11"
/product="Primosomal protein Dnal ATP binding protein
[replication]"
/"ID=B40_02245
/protein_id="gnl|SC|B40_02245""
/gene="dnal"
/codon_start=1
CDS    complement(66192..66950)
/color=10
/locus_tag="B40_02246"
/note="phage replisome organizer protein, protein
motif: TIGRFAMs:TIGR01714 protein motif: Pfam:PF09681.4"
/product="phage replisome organizer protein [replication]"
/"ID=B40_02246

```



/protein\_id="gnl|SC|B40\_02246""  
 /codon\_start=1  
 CDS complement(67318..68940)  
 /ID=B40\_02247  
 /color=4  
 /locus\_tag="B40\_02247"  
 /note="Relaxase/Mobilisation nuclease domain:protein  
 motif: Pfam:PF03432.8"  
 /product="Relaxase/Mobilisation nuclease domain  
 [relaxase]"  
 /protein\_id="gnl|SC|B40\_02247"  
 /codon\_start=1  
 CDS complement(68912..69310)  
 /ID=B40\_02248  
 /color=4  
 /locus\_tag="B40\_02248"  
 /note="Plasmid mobilization relaxosome protein MobC"  
 /product="Plasmid mobilization relaxosome protein MobC  
 [relaxosome]"  
 /protein\_id="gnl|SC|B40\_02248"  
 /gene="mobC"  
 /codon\_start=1  
 CDS complement(69844..70047)  
 /color=7  
 /locus\_tag="B40\_02249"  
 /note="helix-turn-helix domain-containing protein, protein  
 motif: Pfam:PF12645.1"  
 /product="helix-turn-helix domain-containing protein  
 [transcriptional regulator]"  
 /ID=B40\_02249  
 /protein\_id="gnl|SC|B40\_02249""  
 /codon\_start=1  
 CDS 70742..72661  
 /color=2  
 /locus\_tag="B40\_02250"  
 /note="Tetracycline resistance protein tetM from  
 transposon Tn916, similar to AA sequence: UniProtKB:P21598  
 protein motif: CLUSTERS:PRK13351 protein motif: Cdd:COG0050  
 protein motif: TIGRFAMs:TIGR00484 protein  
 motif: Pfam:PF00009.21"  
 /product="Tetracycline resistance protein tetM from  
 transposon Tn916 [antibiotic resistance]"  
 /ID=B40\_02250  
 /protein\_id="gnl|SC|B40\_02250""

/gene="tetM"  
 /codon\_start=1  
 CDS 72713..73951  
 /color=2  
 /locus\_tag="B40\_02251"  
 /note="tetracycline efflux MFS transporter Tet40, protein motif:CLUSTERS:PRK10054 protein motif:TIGRFAMs:TIGR00880 protein motif:Pfam:PF07690.10"  
 /product="tetracycline efflux MFS transporter Tet40 [antibiotic resistance]"  
 /"ID=B40\_02251  
 /protein\_id="gnl|SC|B40\_02251""  
 /gene="tet40"  
 /codon\_start=1  
 CDS complement(74094..74234)  
 /color=1  
 /locus\_tag="B40\_02252"  
 /note="Maff2 family protein membrane protein conjugal transfer protein, protein motif:Pfam:PF12750.1"  
 /product="Maff2 family protein membrane protein conjugal transfer protein"  
 /"ID=B40\_02252  
 /protein\_id="gnl|SC|B40\_02252""  
 /codon\_start=1  
 CDS complement(74302..75051)  
 /color=4  
 /locus\_tag="B40\_02253"  
 /note="type IV secretion system protein TraG VirD4 components, protein motif:CLUSTERS:PRK13850 protein motif:Cdd:COG3505 protein motif:TIGRFAMs:TIGR02759 protein motif:Pfam:PF12696.1"  
 /product="type IV secretion system protein TraG VirD4 components [coupling protein]"  
 /"ID=B40\_02253  
 /protein\_id="gnl|SC|B40\_02253""  
 /gene="traG"  
 /codon\_start=1  
 CDS complement(75228..75593)  
 /ID=B40\_02254  
 /color=1  
 /locus\_tag="B40\_02254"  
 /note="hypothetical protein"  
 /product="hypothetical protein"  
 /protein\_id="gnl|SC|B40\_02254"

/codon\_start=1  
 CDS complement(75672..75863)  
 /ID=B40\_02255  
 /color=9  
 /locus\_tag="B40\_02255"  
 /note="transposon-encoded protein TnpW"  
 /product="Transposon-encoded protein TnpW"  
 /protein\_id="gnl|SC|B40\_02255"  
 /gene="tnpW"  
 /

/codon\_start=1  
 CDS complement(75907..76770)  
 /color=10  
 /locus\_tag="B40\_02256"  
 /note="DNA replication protein dnaC ATP binding protein,  
 similar to AA sequence:UniProtKB:POAEF0 protein  
 motif:CLUSTERS:PRK08116 protein motif:Cdd:COG1484 protein  
 motif:TIGRFAMs:TIGR00362 protein motif:Pfam:PF01695.11"  
 /product="DNA replication protein dnaC ATP binding  
 protein [replication]"  
 /"ID=B40\_02256  
 /protein\_id="gnl|SC|B40\_02256""  
 /gene="dnaC"  
 /codon\_start=1

CDS complement(76767..77519)  
 /color=10  
 /locus\_tag="B40\_02257"  
 /note="phage replisome organizer putative N-terminal  
 region, protein motif:TIGRFAMs:TIGR01714 protein  
 motif:Pfam:PF09681.4"  
 /product="phage replisome organizer putative N-terminal  
 region [replication]"  
 /"ID=B40\_02257  
 /protein\_id="gnl|SC|B40\_02257""  
 /codon\_start=1

CDS complement(77633..78031)  
 /ID=B40\_02258  
 /color=1  
 /locus\_tag="B40\_02258"  
 /note="Cysteine-rich VLP domain-containing protein"  
 /product="Cysteine-rich VLP domain-containing protein"  
 /protein\_id="gnl|SC|B40\_02258"  
 /codon\_start=1

CDS complement(78012..78188)

/ID=B40\_02259  
 /color=1  
 /locus\_tag="B40\_02259"  
 /note="hypothetical protein"  
 /product="hypothetical protein"  
 /protein\_id="gnl|SC|B40\_02259"  
 /codon\_start=1  
 CDS     complement(78288..79838)  
 /color=4  
 /locus\_tag="B40\_02260"  
 /note="Plasmid mobilization system relaxase MobA/MobL family, similar to AA sequence:UniProtKB:P07112 protein motif:CLUSTERS:PRK13889 protein motif:TIGRFAMs:TIGR02768 protein motif:Pfam:PF03389.9"  
 /product="DNA strand transferase Plasmid mobilization system relaxase MobA/MobL family [relaxase]"  
 /"ID=B40\_02260  
 /protein\_id="gnl|SC|B40\_02260""  
 /gene="mobA"  
 /codon\_start=1  
 CDS     complement(79921..80217)  
 /color=1  
 /locus\_tag="B40\_02261"  
 /note="Protein of unknown function DUF3847, protein motif:Pfam:PF12958.1"  
 /product="Protein of unknown function DUF3847"  
 /"ID=B40\_02261  
 /protein\_id="gnl|SC|B40\_02261""  
 /codon\_start=1  
 CDS     complement(80157..80696)  
 /color=7  
 /locus\_tag="B40\_02262"  
 /note="RNA polymerase sigma factor Sigma-70 region 4, protein motif:TIGRFAMs:TIGR02937"  
 /product="RNA polymerase sigma factor Sigma-70 region 4 [transcriptional regulator]"  
 /"ID=B40\_02262  
 /protein\_id="gnl|SC|B40\_02262""  
 /codon\_start=1  
 CDS     complement(80693..81154)  
 /color=7  
 /locus\_tag="B40\_02263"  
 /note="RNA polymerase sigma factor Sigma-70 region 4, protein motif:TIGRFAMs:TIGR02937 protein

motif: Pfam:PF08281.6"  
 /product="RNA polymerase sigma factor Sigma-70 region 4  
 [transcriptional regulator]"  
 /"ID=B40\_02263  
 /protein\_id="gnl|SC|B40\_02263""  
 /codon\_start=1  
 CDS complement(81165..81617)  
 /color=7  
 /locus\_tag="B40\_02264"  
 /note="RNA polymerase sigma factor Sigma-24, protein  
 motif: CLUSTERS:PRK11924 protein motif: TIGRFAMs:TIGR02937"  
 /product="RNA polymerase sigma factor Sigma-24  
 [transcriptional regulator]"  
 /"ID=B40\_02264  
 /protein\_id="gnl|SC|B40\_02264""  
 /codon\_start=1  
 CDS complement(81721..82134)  
 /color=7  
 /locus\_tag="B40\_02265"  
 /note="RNA polymerase sigma factor Sigma-70 region 4,  
 protein motif: TIGRFAMs:TIGR02937 protein  
 motif: Pfam:PF08281.6"  
 /product="RNA polymerase sigma factor Sigma-70 region 4  
 [transcriptional regulator]"  
 /"ID=B40\_02265  
 /protein\_id="gnl|SC|B40\_02265""  
 /codon\_start=1  
 CDS complement(82624..84279)  
 /color=8  
 /locus\_tag="B40\_02266"  
 /note="ABC-F family ATP-binding cassette domain-containing  
 protein, similar to AA sequence: UniProtKB:P63389 protein  
 motif: CLUSTERS:PRK11819 protein motif: Cdd:COG4555 protein  
 motif: TIGRFAMs:TIGR03719 protein motif: Pfam:PF00005.21"  
 /product="ABC-F family ATP-binding cassette  
 domain-containing protein [transporter]"  
 /"ID=B40\_02266  
 /protein\_id="gnl|SC|B40\_02266""  
 /codon\_start=1  
 CDS complement(84598..84951)  
 /ID=B40\_02267  
 /color=9  
 /locus\_tag="B40\_02267"  
 /note="transposon-encoded TnpV family protein"

/product="Transposon-encoded TnpV family protein"  
 /protein\_id="gnl|SC|B40\_02267"  
 /gene="tnpV"  
 /codon\_start=1  
 CDS        complement(84978..86858)  
 /color=9  
 /locus\_tag="B40\_02268"  
 /note="Serine recombinase, protein motif:Pfam:PF07508.7"  
 /product="Serine recombinase [recombinase]"  
 /"ID=B40\_02268  
 /protein\_id="gnl|SC|B40\_02268""  
 /codon\_start=1  
 CDS        complement(86932..87906)  
 /color=4  
 /locus\_tag="B40\_02269"  
 /note="type IV secretion system protein TraG VirD4  
 components, protein motif:CLUSTERS:PRK13876 protein  
 motif:Cdd:COG3505 protein motif:Pfam:PF02534.8"  
 /product="type IV secretion system protein TraG VirD4  
 components [coupling protein]"  
 /"ID=B40\_02269  
 /protein\_id="gnl|SC|B40\_02269""  
 /gene="traG"  
 /codon\_start=1  
 CDS        complement(87903..88376)  
 /color=1  
 /locus\_tag="B40\_02270"  
 /note="uncharacterised PcfB family protein, protein  
 motif:Pfam:PF12687.1"  
 /product="uncharacterised PcfB family protein"  
 /"ID=B40\_02270  
 /protein\_id="gnl|SC|B40\_02270""  
 /codon\_start=1  
 CDS        complement(88413..89357)  
 /ID=B40\_02271  
 /color=7  
 /locus\_tag="B40\_02271"  
 /note="helix-turn-helix domain-containing protein"  
 /product="helix-turn-helix domain-containing protein  
 [transcriptional regulator]"  
 /protein\_id="gnl|SC|B40\_02271"  
 /codon\_start=1  
 CDS        complement(89486..89704)  
 /ID=B40\_02272

/color=1  
 /locus\_tag="B40\_02272"  
 /note="hypothetical protein"  
 /product="hypothetical protein"  
 /protein\_id="gnl|SC|B40\_02272"  
 /codon\_start=1  
 CDS 89908..91311  
 /color=9  
 /locus\_tag="B40\_02273"  
 /note="Serine recombinase, protein motif: Pfam:PF07508.7"  
 /product="Serine recombinase [recombinase]"  
 /ID=B40\_02273  
 /protein\_id="gnl|SC|B40\_02273""  
 /codon\_start=1  
 CDS 91570..92433  
 /ID=B40\_02274  
 /color=1  
 /locus\_tag="B40\_02274"  
 /note="hypothetical protein membrane protein putative  
 conjugal transfer protein TrbL/VirB6"  
 /product="hypothetical protein membrane protein putative  
 conjugal transfer protein TrbL/VirB6"  
 /protein\_id="gnl|SC|B40\_02274"  
 /codon\_start=1  
 CDS 92743..93972  
 /color=9  
 /locus\_tag="B40\_02275"  
 /note="IS91 family transposase, protein  
 motif: Pfam:PF04986.7"  
 /product="IS91 family transposase [DDE recombinase]"  
 /ID=B40\_02275  
 /protein\_id="gnl|SC|B40\_02275""  
 /codon\_start=1  
 CDS 94026..94211  
 /ID=B40\_02276  
 /color=1  
 /locus\_tag="B40\_02276"  
 /note="hypothetical protein"  
 /product="hypothetical protein"  
 /protein\_id="gnl|SC|B40\_02276"  
 /codon\_start=1  
 CDS 94168..94635  
 /ID=B40\_02277  
 /color=1

/locus\_tag="B40\_02277"  
 /note="hypothetical protein"  
 /product="hypothetical protein"  
 /protein\_id="gnl|SC|B40\_02277"  
 /codon\_start=1  
 CDS 94942..97353  
 /ID=B40\_02278  
 /color=4  
 /note="protein motif:Cdd:COG3451 protein  
 motif:TIGRFAMs:TIGR02746 protein  
 motif:Pfam:PF12846.1locus\_tag=B40\_02278product=Conjugal"  
 /product="Type IV secretory system protein TraC VirB4  
 components AAA domain [ATPase mating pair formation]"  
 /gene="traC"  
 /protein\_id="gnl|SC|B40\_02278"  
 /codon\_start=1  
 CDS 97385..98623  
 /ID=B40\_02279  
 /color=4  
 /locus\_tag="B40\_02279"  
 /note="NlpC/P60 family protein"  
 /product="NlpC/P60 family protein [pepidase]"  
 /protein\_id="gnl|SC|B40\_02279"  
 /codon\_start=1  
 CDS 98636..99331  
 /color=4  
 /locus\_tag="B40\_02280"  
 /note="NlpC/P60 family protein, similar to AA  
 sequence:UniProtKB:P21171 protein motif:CLUSTERS:PRK13914  
 protein motif:Cdd:COG3584 protein motif:Pfam:PF00877.13"  
 /product="NlpC/P60 family protein [pepidase]"  
 /ID=B40\_02280  
 /protein\_id="gnl|SC|B40\_02280"  
 /codon\_start=1  
 CDS 99355..99618  
 /ID=B40\_02281  
 /color=1  
 /locus\_tag="B40\_02281"  
 /note="hypothetical protein DUF4315 containing protein  
 conjugative transposon"  
 /product="hypothetical protein DUF4315 containing protein  
 conjugative transposon protein"  
 /protein\_id="gnl|SC|B40\_02281"  
 /codon\_start=1



CDS 99608..100375  
 /ID=B40\_02282  
 /color=1  
 /locus\_tag="B40\_02282"  
 /note="hypothetical protein"  
 /product="hypothetical protein DUF4366 containing protein cell surface protein"  
 /protein\_id="gnl|SC|B40\_02282"  
 /codon\_start=1

CDS 100372..102462  
 /color=10  
 /locus\_tag="B40\_02283"  
 /eC\_number=5.99.1.2  
 /note="DNA topoisomerase III, similar to AA sequence:UniProtKB:P14294 protein motif:CLUSTERS:PRK07726 protein motif:Cdd:COG0550 protein motif:TIGRFAMs:TIGR01056 protein motif:Pfam:PF01131.14"  
 /product="DNA topoisomerase III [replication]"  
 /ID=B40\_02283  
 /protein\_id="gnl|SC|B40\_02283""  
 /codon\_start=1

CDS 102672..102827  
 /ID=B40\_02284  
 /color=1  
 /locus\_tag="B40\_02284"  
 /note="hypothetical protein"  
 /product="hypothetical protein"  
 /protein\_id="gnl|SC|B40\_02284"  
 /codon\_start=1

CDS 102838..103314  
 /ID=B40\_02285  
 /color=1  
 /locus\_tag="B40\_02285"  
 /note="hypothetical protein"  
 /product="hypothetical protein"  
 /protein\_id="gnl|SC|B40\_02285"  
 /codon\_start=1

CDS 103364..103567  
 /ID=B40\_02286  
 /color=1  
 /locus\_tag="B40\_02286"  
 /note="hypothetical protein"  
 /product="hypothetical protein"  
 /protein\_id="gnl|SC|B40\_02286"

/codon\_start=1  
 CDS 103670..104269  
 /color=7  
 /locus\_tag="B40\_02287"  
 /note="helix-turn-helix , protein motif:CLUSTERS:PRK09706  
 protein motif:TIGRFAMs:TIGR03070 protein  
 motif: Pfam:PF01381.16"  
 /product="helix-turn-helix [transcriptional regulator]"  
 /"ID=B40\_02287  
 /protein\_id="gnl|SC|B40\_02287""  
 /codon\_start=1  
 CDS 104403..105533  
 /ID=B40\_02288  
 /color=4  
 /locus\_tag="B40\_02288"  
 /note="anti-restriction modification"  
 /product="DUF4316 domain-containing protein  
 anti-trestriction protein ArdA [anti-restriction  
 modification]"  
 /gene="ardA"  
 /protein\_id="gnl|SC|B40\_02288"  
 /codon\_start=1  
 CDS 105563..109063  
 /ID=B40\_02289  
 /color=4  
 /locus\_tag="B40\_02289"  
 /note="anti-restriction modification"  
 /product="DUF4316 domain-containing protein  
 anti-trestriction protein [anti-restriction modification]"  
 /protein\_id="gnl|SC|B40\_02289"  
 /codon\_start=1  
 CDS 109067..109267  
 /ID=B40\_02290  
 /color=4  
 /locus\_tag="B40\_02290"  
 /note="putative tranposon-transfer assisting protein  
 TTRAP"  
 /product="Putative tranposon-transfer assisting protein  
 TTRAP"  
 /protein\_id="gnl|SC|B40\_02290"  
 /codon\_start=1  
 ncRNA 109403..109573  
 /ID=B40\_02291  
 /color=1

/locus\_tag="B40\_02291"  
 /product="group-II-D1D4-3"  
 ncRNA 109598..109690  
 /ID=B40\_02292  
 /color=1  
 /locus\_tag="B40\_02292"  
 /product="group-II-D1D4-1"  
 CDS 109796..111076  
 /color=8  
 /locus\_tag="B40\_02293"  
 /note="Group II intron-encoded protein LtrA, similar to AA  
 sequence:UniProtKB:P0A3U1 protein motif:Cdd:COG3344  
 protein motif:Pfam:PF00078.21"  
 /product="Group II intron-encoded protein LtrA [reverse  
 transcriptase]"  
 /ID=B40\_02293  
 /protein\_id="gnl|SC|B40\_02293""  
 /gene="ltrA"  
 /codon\_start=1  
 CDS complement(111161..112327)  
 /color=8  
 /locus\_tag="B40\_02294"  
 /eC\_number=2.7.11.1  
 /note="Non-specific serine/threonine protein kinase,  
 similar to AA sequence:UniProtKB:O34507 protein  
 motif:CLUSTERS:PRK13184 protein motif:Cdd:COG3349 protein  
 motif:TIGRFAMs:TIGR03903 protein motif:Pfam:PF00069.19"  
 /product="Non-specific serine/threonine protein kinase  
 [kinase]"  
 /ID=B40\_02294  
 /protein\_id="gnl|SC|B40\_02294""  
 /codon\_start=1  
 ncRNA 112529..112722  
 /ID=B40\_02295  
 /color=1  
 /locus\_tag="B40\_02295"  
 /product="group-II-D1D4-3"  
 ncRNA 112762..112833  
 /ID=B40\_02296  
 /color=1  
 /locus\_tag="B40\_02296"  
 /product="group-II-D1D4-1"  
 CDS 112881..114272  
 /color=8

```

/locus_tag="B40_02297"
/note="Group II intron-encoded protein LtrA, similar to AA
sequence:UniProtKB:P0A3U1 protein motif:Cdd:COG3344
protein motif:Pfam:PF00078.21"
/product="Group II intron-encoded protein LtrA [reverse
transcriptase]"
/"ID=B40_02297
/protein_id="gnl|SC|B40_02297""
/gene="ltrA"
/codon_start=1
CDS    complement(114448..114819)
/ID=B40_02298
/color=1
/locus_tag="B40_02298"
/note="Cysteine-rich VLP domain-containing protein"
/product="Cysteine-rich VLP domain-containing protein"
/protein_id="gnl|SC|B40_02298"
/codon_start=1
CDS    complement(114816..116150)
/color=4
/locus_tag="B40_02299"
/note="Relaxase/Mobilisation nuclease domain, protein
motif:Pfam:PF03432.8"
/product="Relaxase/Mobilisation nuclease domain
[relaxase]"
/"ID=B40_02299
/protein_id="gnl|SC|B40_02299""
/codon_start=1
CDS    complement(116111..116440)
/color=4
/locus_tag="B40_02300"
/note="Plasmid mobilization relaxosome protein MobC,
protein motif:Pfam:PF05713.5"
/product="Plasmid mobilization relaxosome protein MobC
[relaxosome]"
/"ID=B40_02300
/protein_id="gnl|SC|B40_02300""
/gene="mobC"
/codon_start=1
CDS    116818..117654
/color=9
/locus_tag="B40_02301"
/note="Tyrosine recombinase, similar to AA
sequence:UniProtKB:P0A2P6 protein motif:CLUSTERS:PRK00236

```

protein motif:Cdd:COG4974 protein motif:TIGRFAMs:TIGR02225  
 protein motif:Pfam:PF00589.16"  
 /product="Tyrosine recombinase [recombinase]"  
 /"ID=B40\_02301  
 /protein\_id="gnl|SC|B40\_02301""  
 /codon\_start=1  
 CDS 118304..119491  
 /color=8  
 /locus\_tag="B40\_02302"  
 /eC\_number=1.1.1.22  
 /note="UDP-glucose 6-dehydrogenase, similar to AA  
 sequence:UniProtKB:P76373 protein motif:CLUSTERS:PRK15057  
 protein motif:TIGRFAMs:TIGR03026 protein  
 motif:Pfam:PF03721.8"  
 /product="UDP-glucose 6-dehydrogenase [dehydrogenase]"  
 /"ID=B40\_02302  
 /protein\_id="gnl|SC|B40\_02302""  
 /gene="ugd"  
 /codon\_start=1  
 CDS 119513..120805  
 /color=8  
 /locus\_tag="B40\_02303"  
 /note="N-glycosyltransferase, protein  
 motif:CLUSTERS:PRK11204 protein motif:Cdd:COG3858 protein  
 motif:TIGRFAMs:TIGR04242 protein motif:Pfam:PF03142.9"  
 /product="N-glycosyltransferase [glycosyltransferase]"  
 /"ID=B40\_02303  
 /protein\_id="gnl|SC|B40\_02303""  
 /codon\_start=1  
 CDS 120783..121820  
 /color=8  
 /locus\_tag="B40\_02304"  
 /eC\_number=3.2.1.4  
 /note="Beta-mannanase, similar to AA  
 sequence:UniProtKB:P16218, protein motif:Cdd:COG4124  
 protein motif:Pfam:PF02156.9"  
 /product="Beta-mannanase [hydrolase]"  
 /"ID=B40\_02304  
 /protein\_id="gnl|SC|B40\_02304""  
 /codon\_start=1  
 CDS 121938..122003  
 /ID=B40\_02305  
 /color=1  
 /locus\_tag="B40\_02305"

/note="hypothetical protein"  
/product="hypothetical protein"  
/protein\_id="gnl|SC|B40\_02305"  
/codon\_start=1

BASE COUNT 30789 a 29453 c 31666 g 30095 t

ORIGIN

1 ccataactg atatattga agatcaaatt tgtgcattg gtaaataat ggtaacaaaa  
61 tattgcaaat ataaaaatg tactttataa ttgctattg aacaaatgat tgcaatgatt  
121 acaagcgtg tataaataat gataaacgga aagagaggta gttatgaaaa acagaacggt  
181 aacagcagtg gtaggagaat cacgattgat ggacacagag gaattaagag cctacacca  
241 cttggggcgt aataatgcca tgaacttg tgaggagatt ggcgcaaaag tccagattgg  
301 acgcagggtg ctatgggaca ggcgaaagat tgacgagtat ttcaattcac tgacgggggt  
361 aaaataggga atgcaaaaaa ataagcataa cagagtacat ataggaatc ggccccgcaa  
421 ggcagattat ccaatagcaa gtctctgcc ttaggcaag gaaaacgcaa tatccactgc  
481 tgatctagtc aagctgagtg gatgcagttc ctacggaaa ctacagcagc atatagccta  
541 tgaagggaac cacggtgcaa ttatctgag tggttcaggg aatggctact gaaacccaa  
601 ggacaggcag gagatagtag agtttgcg aataatggat gcaagggcaa gaaacacatt  
661 tgcggcaacg agaagtgcta aacaggcact aaaagaacca gaggggcagc aggattttat  
721 aagataacaa ggggcgggtg aataatggca gaggcaatga aggattgggc ttaaagtat  
781 gctgaaatcg ggctggcagt gttcccgtt aagccaaagg ataagcgacc ggcaacagag  
841 aatggatgta aggcagctac tataaataaa caacagatag aagcatggtg ggacagatac  
901 ccgattata atacggaat agcaacaggg agcgtttcag gtggcttgg ggtgattgac  
961 ttggatgtg acgaggaaaa gggcgttaat ggatatgaga gtctgacagc ctggcagaag  
1021 gaaaacggag aattgccgga aacctggaca agcatcactg gtcgcggagg atactactac  
1081 atatataaag atggagccac caaccgaaac agagcaggac tttatgatgg cgttgacatc  
1141 cggggagaag gtggctacat agtagacca cccagcatal acccaaatgg tcgtcagat  
1201 gaatgggagc aggggccggg ggattgtgaa atcgccagg cagacaatag agttatgaa  
1261 ttattatgg ggctgcacc agaggactgg gagaacaga cttccagga gccggaagtg  
1321 ataccaaagg gggagaggac aaacagtatg atccggctga ttgggagcct aaaggcaaag  
1381 ggcttgatg atggagccat aaaggcagca gttagggccg aaaatgcaaa gaagtgtatc  
1441 ccgcatca cggatcagga acttgagaag acagtattcc cggcgtgaa acgggatgg  
1501 aaaactgaga aacctatc tgcgatacat gataatggaa aattccgga gcagaaaaac  
1561 tatagtctg aatgttaac gatgaaagag gttgaagaaa aaagtcctga gtggcttatt  
1621 acagactaca taccaagata tcagatcaca acgcttgcg gggatggggg cgcaggaaag  
1681 acaactatat ggtgcgacat agcggcagcg gttagtagtg ggaatcctt tttcttgag  
1741 gccggaatcc cggaagactt ttcaaggca gatccgggaa cagttcttt ctttcatca  
1801 gaagattcgg cagagtatac gttgcgtagc aggctgagaa aggctggagc cgcattggag  
1861 aatatacatt ccatcagcct gaaagatgaa cggtttctg atgtaaagtt cgatagcccg  
1921 tttctgaaa gactgattga acattatcgt ccaaagctgg taatattga tccgattcaa  
1981 agttttatc cgccagacat ccagatggga caaagaaatg ccatgagatc atgcttgaat  
2041 cctttgattg gttgggca aaaatacggg actacttcc ttgtgattg tcatgcaaat  
2101 aaacagagcg gtgttatgg tcgaaaagg atagcagaca gcgctgatat ctgggatata  
2161 tccagaagtg tattaatgg gggagatact ccgaaaagg gtgttcgcta tctgtcacat  
2221 gagaagtgta attatggcat gacgggtgat acgtacttt tctcattga aatggcagt

2281 attataaaca aaggctatac agagaagaaa gaccgggagt ttgtaagcga gaattcattt  
2341 attgtccagc agaggccgca aaaggaagag gcgaaagagt ttatattgtc attcctgagt  
2401 gatggtgaaa aagaggttgc ggaactggat gagatggcag cggcgcaaag tataaccaag  
2461 aattcattaa aaaatgcaa agccgaatta aggaaagaag gtaagataaa ataccgtaat  
2521 tttggctatg ggagtgaccg taaatatttc atttctcta taccagtga aaaagtcaac  
2581 gagtaaataa aaaacatagt atttataagg gtttgagata ctagaggggg gtcaacgagt  
2641 aaagcgagta aaggctattt actggagggg ggcctctagt aaatggagcc ctgtaaaca  
2701 gggcgtttgc ctttactgg ttgaccggtg gcccggtat atgagaatca acgagtaagg  
2761 agaggagcca acgagtaagt gagcgtgaac atattagcag attttaagga gaatggtatt  
2821 gataaaaatg agccacatat tgtgctgtat acagataatg agtatgaggc aggcattgatt  
2881 ataaaggcga aactggagga gagaggctgt aaggttgaat ctctgattgt ggttgaagga  
2941 aaatggacgc tgggtcaact tcatgatatg gctaattatg gtactggaat agaaaagga  
3001 catccccggc tgttgtatgt gtctggcgac atgttcagc atctgaacgg attaagaaa  
3061 aggccggaag aagtggcaca actaaaaaat gaaatcagga gaagggcaaa tggacagaaa  
3121 ggaaacaggg aagcgcagta ggaataaagg taaagcagga gaacgcgagc tggcaggagt  
3181 attaagggat tatggatatg atgacaggag agggcagcag ttttgcggca gcaatgggga  
3241 cgctgatgct gttgtcttc ctggaataca tctcagatgt aagcggacgg agcggttaag  
3301 cctgtatgat gcaatgggac aggctgaaag ggattcacgt agagaagaga taccagtgt  
3361 tatgcatcgt agaaccatt gtgaatggct tgcgatcctt cctcttgata acttcatgga  
3421 gatttacaga gagtgggagg caggccagat gcaaaaataa aagagcttgc cacaaaggac  
3481 aagcccacag cctaaaaac ctaacattt ttgtaaagga gtgggctgta tatgtcaat  
3541 gaacaccggg tgaaccgg caatttcaa aacgaactac ggaggaacaa cggggaattt  
3601 caaataaagc aaagaggaag cagtgagaac tttccagttg aaccattggt gaacaacaca  
3661 aaattacagg tgaaccgag agcgaaccgt gaaaaattt ctgaaatgac tgggaggggc  
3721 ggtctgaaaa gttccgataa aattcatcag accgatgcc ctccaatcct cacacaaat  
3781 tccgaatacg acaaaaaag tggtacatct gcggagacga tggaaatcc cttttccga  
3841 tccaatgagc agttagtgc gttgatccgg gccagtatag atgaagctga caatatgctg  
3901 cagctatggc agcagaacca gcggttggta aaaatgatgg ctgtgaagt tacgtgccg  
3961 gctgaattag atgatctat gcaggagga tatattgctt tgtgtgaagc tgtccgacac  
4021 tatgaccgg agaagggagt tgtattatc acttatgctg cgttctggat cagacaaggt  
4081 atgcaacgat atattgaaa ttgtggtaat tgggtgcgta ttctacaca tgcccgggaa  
4141 tggatgcaca aatataagag gatggaagca gactaccgga aatattacgg caccactcca  
4201 acgatcagg tattgtgtgc gtcctgggg atcagccagg agaaactaaa gtccatcaga  
4261 gaaagtatag gaatggggca gattttagc ctgaatgaac ctttagggga tgaagaaggc  
4321 gaactgactg tagaggactc tttggatca ggtgaggagc tggaaagggga tataatcggc  
4381 cggctggact accaaggcat gaagaaacag ctctgggaag cggtaggacag cctgccaggg  
4441 attcaatcgg atgtaatac ctgccggtt ctggatagca aaactctaca ggaaatagga  
4501 gagaagtata atcttcacg ggaggtagca cggagttatc aggacaaagc tatgcgggaa  
4561 ttaagaaagc ccagcaggag ccggaagttc agaggtact atgaagaata tattcggct  
4621 gcatcaattc atcatatagg gcttgaatc ttccggcgta catggacaag tgaggttag  
4681 agggatgcca ttggaatatg gtgacgttcc gaacgttcgg aaaccgacga atgcaacgg  
4741 ttttattt ttgggatctg gcagcaggct acattgtgct gaatcccc taaaataaaa  
4801 tgcaggaaaag cctatagtag accggttg gggattcaga taatgcacgg gccgcatata  
4861 tgggggtgtg gtattgaaga caaagagaag cccccgacc ctccagcac cgatttaaac

4921 gtgataggaa cggagtgagg taactgttc caatggtgca gcactctgaa aatattttt  
4981 ccatctcaat ctaagaataa actcgaatac tatttgaagt gttgcaataa tagattgggg  
5041 acaggatcaa gacattcgag atcccctaaa agggacgttg caatgttgta tacttagtat  
5101 ttcgtatatt taaaaacaa aggagcggag aatgagaagc tatattgatg taaaggattg  
5161 cataaagctg ggcgcgagga acatgactgc cgccatagca aagataaacg gaaaagagta  
5221 caacatacag ttcacgaagc agaggacagg atttgggtgaa aagctgttc ttgtttgcc  
5281 gaagtgtggc agcagggcga caaagctata tctgtatgga gatgggcttc tgtccggga  
5341 atgctatccg tttccggtt atgacagaat taagaatgta tctatcggca gctataacta  
5401 tatttctac aggatgctcg ggcttgaag gcgtgaacga attccgatta agttccggt  
5461 ccattatctt gaatatgaga aacaaaata taagcaattt gataaatggc acatgacaat  
5521 taaaagcta caggcattgg agaacatgag gaaccaggct atatttttcg gtaagaagta  
5581 ttcacgggag acaattaaca gtatcttga agagcggaac ctatatctgt atgtctgta  
5641 tctgtacgat ctggaattgt atttctatga ttgggatgtt ggttcttga aatatccggg  
5701 aatgagcca gaggtcaagc caaccggtat aatgagtcag gcaagtaaat accagagagc  
5761 ggtgttggga cggcatcgtt aagcgggata gaggttaattc ggacatgggt acgttcattg  
5821 ggaaataaat cacttttagg tgaggtttg gtaaggtatg tggaaagtat catcgttatc  
5881 acataatatg agctgatatg gtatggctat gtctgataa aggaggaaaa catgagatta  
5941 aatgtgaata gatataaaga actattggaa agtaagaatt tggatgaact ggacattgag  
6001 aggaaaacag gactttcgat gagtacaatt aactggatat ttgaaaatga gtatctggag  
6061 ataagcacgc tggagcggct ggctgatgtt gtaaagtgtg gtacaaagga gattgctctg  
6121 ccagatcata acaacattga gaatgtcatt gaatggcagc gagacagtaa gaccgctacg  
6181 gtgagcctaa cacagggcag aaccattaca agagtgatga agctggctga gagccgccg  
6241 gaggaatgcc ggatcattgc agagaataaa gatggcagca tttgtccag ggtccggta  
6301 ggatggataa gaataaaccc gggaatgaac ttgaatgagg aacagagaga aaaacgggct  
6361 gatcggatgc gctgcaatat tttgaacaac gattatagtc gtggtgaaat gggataaat  
6421 caatttaaat gcctttaggg tagaaatata aggctaaagg tttaaatgg cttttaata  
6481 agaattgcat ggaatagtgt tggacattga taatttgcatt attaggggga tatgaaacag  
6541 gctgttatat acttgataga acagcagcgg gatgcttctg cttttatac ttaaaaatat  
6601 tcttcattt ctgagtcctt aaaaggagta tcttgacaaa tatgagattc taaaaggtt  
6661 attccgacat ttccgacgcc ctaaaaggga aaataaaacc gccctcaatc ctgatggtc  
6721 ggggcggcag tgggttaaat attcaattgt ccgaagtcga ttgacaggtc tcatagatg  
6781 cctgcttta cggaatcgga gaaagtatag tcccctgtat cctcagattc aaaattataa  
6841 accaaaatac ggttcttctc aggatcgact atccagattt cccgtacacc ggcagtacgg  
6901 tatttgaata atttagttaa atagtctatg cgcttactgc ttggtgatac aatttcaata  
6961 accagtcag gcgctcccgt gcaacctta tccgttaatt tgcaggggtc acagattacg  
7021 ctgatatccg gttctacgta ttcgtatcg tcttcattga gaaatacggc aatggggca  
7081 ggaaacactt cacaaggtcc accttagag tggatatagt taccgattgt tctatcaagg  
7141 tgatgtaata ttcttgggtg gtagtactt ggtggggcca tataatagat ctgcccgtc  
7201 atcagttcgg cacgtacccc atcaggcagg gcatagatat cttcagattg gtattcttc  
7261 ttctggttg gtaatgacat gataacacat cctctcatga aatagtattg acggagtggc  
7321 agtggttatt cagagattc cgaggcccta aaaaggaatc tggtttcgct cacttttgag  
7381 ctttattcag tatcgcgttc cattcgttca tcaatagcct ttttaatgta accgttgact  
7441 gattcccctg tcatatctgc atgttggcgt actgttctt tgtaaccctt tgggacaacg  
7501 agattaattc tttcttatt tcagactgc cacttattt tatagtctgt ttttctgcc



7561 aaaagtatca ccttctttca tggggggcgc tctgataatg gagacacctt ttctattatg  
7621 gttagattat aacattaatt tcaatcgtgc acaagataca aaatagccaa atcttgaca  
7681 cgatatttgt gtataatgtc aattgaaaac atatcgtgta cacgatataa tataatcaag  
7741 ataaaggtaa ggcaaacgaa cagccgaaa agctgtgaag ctgaaaacca tatacctgtg  
7801 agtgaacaat agagggatca atagccagga agatgattca gccggatgcc agaccggtat  
7861 caacaataaa taaaagcaac cggggaagcc gaaagcccc acaaactttg agcatatac  
7921 ttgtgaacgg tctggagatg cagtaatagt caagaagatg ctcaagggat tgcactggaa  
7981 aggagatttt acaatgacag agagaatgat tgtcaaccgc gtaagaaagc tgaagagct  
8041 ggaagcgcag cagaaggaga ttgaggaaca gattgaggca ctgaaagcgg agatcaaag  
8101 agacatgcag aggaaggatc tggaggagca gaaggccggg gattatatgg taaggttcac  
8161 aacggttatc tcaaacagat ttgatgtaa agcattcaa gcgatcatg caaagctgta  
8221 tgaccagtac atcaggacaa cggagagcag aagattctcc atcgataaa aaatagccct  
8281 tgccagtgtc gcaaacactg acagggcgg catagccgga gctacactat aaagcaata  
8341 catagtagca taatcccggt gggaaggga agaacaatt gaatttggat aatttagaga  
8401 aactataaa ataccatcca taccatctt gtacttttgc tgactttgca aatgtaacgc  
8461 aggatttgtt agaagtggca ttaaaggag aggaggagct tgaaccgga gaagttagga  
8521 atatttcgga atatgtacaa gttccgtatc gggcttgac ctgtaaaaag atgattatg  
8581 taagcaagga taggtaccgc caccgtatta tgttgaaga gctctacgaa aagctattg  
8641 aatatggga agcagcggaa aatgggagca aagaagccgc cagctataag cgatataatt  
8701 ataagcattt ggtaacactc gtggcagact ttcaatcgc gggagcagtt acttattgtc  
8761 gttatttggg agtcaaagaa atgatggaac agtacctgtt gtttatacga tgcgaaatgc  
8821 gaaaaccaag aggaaggag attccgacat gagtaacgaa gaatataggc ggaaaagacg  
8881 atataaagcc aaaggggcaa acgatgttgt tgctgatctt gatgaaagaa ggtgctgagt  
8941 atgcaaatg aaggatatag gcaatgcata gtacaaatgc tttatctaat ggataaggaa  
9001 gaagataacg aggttctgga agagatatat accattgcac gctaccatta tattaatg  
9061 gctcctgaca gaaggaagca aattgataag ttagaggta tagtattcag gatcatagcc  
9121 ggaatggatg aagagcgcgt caggcaatta tataacgtat tagttggaca ttacagattt  
9181 tcgggggagc ggtgcggtga catcgcccc ctgggaagca gccccataa ataaaaat  
9241 gattgataag ttagtgggag gattaattta tggttgaata tataaaactt aaaccgggtg  
9301 atgagctgtg gaaagctgaa atcctaatg acaaacact tttcggaatg cttaccgatg  
9361 agcagttttc taaaatcgaa gatgggaggt gcatggaatt aaaggagtc tgctcatgc  
9421 agaggccgcc attttacgga atatccctc aaatagacta tgaagaagc acgcctata  
9481 tagaattgat tgagagctt gatgtaatt atcttatgca ggaaagggg tgcgaagctg  
9541 tatttaacag cattgattat gctgaccaga ttgtagacct acataaatg attggcggt  
9601 ttagcaggga catagaaatt gtaagaaat tgatggacag gaggggact acatggcgaa  
9661 gctgacacca attaaggcga tcagagcaa gtgcctggat tgctgcaatg gtcaaatgaa  
9721 ggaagtcagg ctttgcactg ttgagaattg cgcgttacac gattataggg acggacacag  
9781 accgaaaggc gaagaagta ccatcggaga tgtttcgt gaaaaatcgt gagatagggc  
9841 acaattttt ttcaagatta atgcattggg gctgttcaga ccttaaggaa agaagtgaa  
9901 ttctatgaaa gccgatata tggaacaaat gtaccggtac tatgtacaaa tgccgcgcta  
9961 taaggaactg cgaaagatat atgactatga cattccaag gccggcgcg atgatctgga  
10021 aaacagcatg ggagcagaga actattcgaa agcccaggag atggccttct ctatatctga  
10081 tcaggctgaa cgggtgggat tcacttgg attccagatc ggatcaaagc tcatgtgca  
10141 gtctatagga gaatgggagg tggacgaatg accgaaaag caaaaaccc aagggtgagg

10201 caacacccaa ggggcaaaaa ataagcataa cccaatacac acagtacggg ctatattgat  
10261 tatataccgt catatagccc atttgcaaga caagattcac ctgctgccag gcagcagtga  
10321 gagaaaggac gggttatatgt caagaattgg aaatatatac acagaatcat acagcaaatc  
10381 atcggctgcc atatcagcgg atggcaaatt gtctgaaacg atccaggaag aaatcgtgga  
10441 caggatcggg gagccagcca gcatgacgaa ggaatctgta gcagatttaa tttatgccg  
10501 gagcagttat ggacagaaaag caggatttga gagcggtttt aactatgcaa tagccctgat  
10561 atttgaaagc ctaatgagtt aggcgggtgt tatatggcag tcgataaaaag agtcaggaaa  
10621 ttacaaaaag gaatacagca aaggtatact gactatgagg ggctttcat gtacaaggga  
10681 gaaagatac tggatcatgg tgcgacaatt acggaaacac aaaagaaaat gactgactta  
10741 aagtacaaac tgcagcacgg cctgtttgta gaaagtagca aaaccaccct ggatgaatgg  
10801 tttgaaacct ggctgaatgt ttctattaa aactctgatt attcaaaaa agcccggaaa  
10861 tacgggcaaa tcacgggata aggacaccga atttactacc catttactac attcggaggg  
10921 agccttgaca cgctgtcctt tccatgaag cccactatcc caaacagcgc acatcggaaa  
10981 atcgaatag acaccgcaga cggcggcgtt ctctttccc tttggggaga tcaggacgcc  
11041 gctttttgc gcccaatag aggaaggagc gaccgcctat gtactttacg tccggcagcg  
11101 accgggcctt tgaacagctc atgcagacaa ggccaggcgc agatcatttt gacagcggcg  
11161 aggccggagc gccggaggac tgcggcactt gccgattta ccgccacac tggagatc  
11221 agttttgcat ctacgcagaa tgccttacc agccgggcaa gtcaccgtc tttgacacgg  
11281 tgaatttca agtgaagga gtgtgcgaca agatggcagt ttttcgagtg gagaaaaacc  
11341 gaggatacac ggtgatgtcc aaccaccacc tgcggaataa ggacttctcc ctgaaagcca  
11401 agggcctgtt atcgaatg ctctctctgc cggagggctg ggactacacg ctaaagggcc  
11461 tgtctttgat aaatcgggaa agcatcgacg ccatacggac ggccgtgtgg gagctggaac  
11521 gggccggata taccaccga cagcagaacc gggacggcaa gggaaagatg gcagatatg  
11581 tctataccat ctacgagcag ccgagaccg aagcatcggg gttggaacag ccgatattgg  
11641 aaaaccggg gttgaaaaat ccaacatcgg ataaccgac accggaaaat ccaacgcaaa  
11701 taataaaga tagatcaagt aaagaaaaat caaatacaga tggacgaatt accgattcca  
11761 ttctatctt ttccctccc tctctttgg agaaagcagc ggctgcgccg ccggaacgga  
11821 aaggaacggg agcgaagtca cagagcgcgg tagcggttta tcgggaaatc atcaaggata  
11881 acatcgagta tgaacacctt tgccagcaca ccaaggggat tgaccgggaa ctgctggacg  
11941 agatcgtgga cttgctggg gaaaccgtat gcagcggccg aacgaccatc cgatttggc  
12001 gggacgatta ccccgctgag ctggtgaaat ccaagttgat gaagctgaac agtcccaca  
12061 tggagtttgt ctttactgt atcagcaaaa acaccacgga aatccgaaat atcaagaaat  
12121 acctgctggc ggttctgttc aacgccccaa gcaccatcaa cggctattac acggcactgg  
12181 tggcccagca tatgaacacc ggcaaaatct gaaaaaggag gacagcccta tgaacaggg  
12241 aactttgatt tttgacgagc aggcagaccg ctatgacatc cgttttgacc tagcggacta  
12301 ctacggcggc ctgcactgcg gagaaacctt cgatgtactg gtaggcggca gatggaggcc  
12361 caccgcata gaaatggctg aaaactggta tctgggtggg atccgcaccg acgacctctc  
12421 cggcctgcgg gtgcggatct aagccgtgcc gctgcctgc tttgacttc aaggaggat  
12481 agcagttgca ggaagaaatc gaacagaaaa ccatcgcgtt agcggttaag acgggcaagc  
12541 tcaccggcca ggtattcgag gcggccatga agaaatttct ggccgcccgg cagaaaggga  
12601 caggaaaggc acatcagga aaacagagct tgcggcagct caaaaaggac ggttccgcc  
12661 tgtccaacat tgaatcacc gatccaaca tcggcctgtt tcggcctgc gccaagaaat  
12721 acggaattga tttaccctg cggaaagacc gcaccacca tccgcccgg tatatcgtga  
12781 tttcaaatc caagcaggcg gacaatctgg aacaggcgtt taaggagttt acggccaaga

12841 agctcaaaca gcaggaacgc ccctccatcc gaaaggccct gtcggctatg aagcaaaaga  
12901 cggcggccag aaaccgccag caggccaagg agaaaatcaa ggaaaggggg ctgtctctat  
12961 gaggccggaa gtgaaaaagc tgataatcgc aaacctgccc tatctgctgt tcgtttacct  
13021 gtttggcaag ctgggacaga cctaccggct ggcggtggg gcggatgtct cagaaaagct  
13081 gctgcacctt gcggacggct ttcccttgc cttgaaaac gccgccccca gcttccacct  
13141 gttcgatctg gcggtgggtg tggccgggtgc ggtggcattg cgtctgatgg tgtactgcaa  
13201 gagcaagaac gccaagaaat accgccgagg cgtagaatac ggcaagtccc ggtggggcgg  
13261 ccccaaagat atagccccgt acatcgacc ggtgtttgat aacaacattc tcctgaccca  
13321 gacggaacgc ctacatga acaaccgcc caaagacccc aagaccgcc ggaacaaaaa  
13381 cgtgctggtc atcggcggtt ccggcagcgg caagacgca tttttgtga agccgaacct  
13441 gatgcagtgc gtgtcaagg attatccggc ctcttcatt atcaccgatc ccaaaggggg  
13501 cctgatcggg gaggtgggccc agctcctgt gcgaagcggc taccgggtca aagtgtgaa  
13561 taccatcaac tttccaaga gcatcggta caaccattc cgctacatta attcgaaaaa  
13621 agacatctta aagctgtca acaccctgat ctgcaacacc aagggggagg gcgaaaaaag  
13681 cgccgaggat tttggatca agtcggaacg tctgttjat tcggctctca ttggctacat  
13741 ctggtacgaa gcgccggacg atgaaatgaa ttcacgacg ctgcttgaag tgatcaatgc  
13801 gtcggaggcc gcgaggacg acccggaatt tcaatccccg gtggatgcca tgtttgaacg  
13861 gctggaagaa aaagaccgg aacactttgc ggtgcgccag tacaanaaat tccttctgc  
13921 ggcaggcaaa acccgagtt ccattttgat tagctcggga gccagattag cgccattga  
13981 catccgggaa gtgcgggagc tgatggagga cgacgagctg gagcttgaca ccatcgggga  
14041 tgaanaaacg gcctgttcc cattatgag cgacacggac acgacgtta acttcattct  
14101 taccatggtg cagagccagc ttatcaacct tttgtcgcac cgggccgatg acaatacgg  
14161 cgggcccgtg cccgtccatg tgcggatgat tctggacgag ttgccaaca tcggtcagat  
14221 tccaacttt gacaagctga tcgccacat ccgaagccgg gaaatctcgg cttctatcat  
14281 ttgacagac cagtcacagt taaaggccat ctacaaggat gcagcggaaa tcatttccga  
14341 caactcgcac tgtacgtttt tctgagtg aagaggtaaa aacgccaagg aaatcgtga  
14401 cgtgctgggc aaggaaacga ttgacagcta caacaaagc gaaaaccggg gcgcgcagac  
14461 ctcccacgga ctgaactacc aaaaactcgg aaaggatatg ccataattgt tcgtgaagag  
14521 ttcagttgcc tgaatttta catgaacagg gacacgatca actggattct gaaaaacga  
14581 atacaggagg tcggaatgg agaaattacc gaaatacacc cacgcaaacg gcatcgacta  
14641 tgttcttgcc ggggattatt acatccctat gctggcgtg ccggaggaaa gccgccctat  
14701 tgggcgctgg ggacggatgc accaaaacta tctgaaagag ttccgtccc gatattatg  
14761 cagcttattg ctgtcgggta aactgtggac ttacctgcc gatctgaatg aacaggcaca  
14821 ggatcggctg gatacggta cagcgcagat gatggctgcg gagggcgtga ccgaggaatt  
14881 gaagcgcact tcccaaatgg agtgggttcg ggctgcta tccatccgca gccgggcgga  
14941 agaaatcatc ctgcacgaaa tgatttatgt ataaggagac tgccatgaga tatcgggtg  
15001 aacggcggga gggccagcac tcctgatta tgaacagccg ggccgagctg ctggaatacc  
15061 tgaagcatac cccgccgga acaatcgcag acatacggaa aatttataag aatgggatta  
15121 cggattctgt catgaaacc tacttccctt atggcggata cagaagcaag ggataacggc  
15181 catcaggctg cttgtcagt gctccgcaa atcaaaaatg atattcgtt gctgcacgag  
15241 ccagtcgta aattcattc ggctggctt ttccgtctg atcggcgtt tcctttcag  
15301 ggcttcttt ttgaacgctt caaaagccgc tagcatttct tccagccgt cagccgggaa  
15361 gttgggattt ttcttgcct tattgatgat attgcgccag tgctggcact cgttttata  
15421 aacgaggtca tattgttat ttctggccc tttatcaag ccccgctt tttcaagcgc

15481 ctgcgcttct cggcatttct cactgcacaa ttcgtagcgc tggctcctgg caagaaagat  
15541 tttcccgcag gttttgcatt tccgatata caagccccag tcggaaagcc ggttcagata  
15601 atagataatc aaaggatgga gggacacata agcggcaacg cattcagccc ctcttttatt  
15661 gtcgggatac cagaggtcga gccgggtatc ttcggctggc accgatcccc atatccgatg  
15721 ggagatattc agccgctggg gtctgccggt atccgggtca aattccagcg gcgggtcttc  
15781 cataaatgtg gctgtaaagc cgttcatttt acggataaag cggtcacagg cggctggcct  
15841 gtcccgtggt tccctggctc gcagatactc gttccagata cggaaacgccc catacattct  
15901 caccggatcg ccggtgagat attttttga aagaaattct ccggctgcct gttccaacgc  
15961 aggctgttcc cagcggttcg agtgcagggc tcccgcagc ggggacagtc ccaaacagt  
16021 ccattccccg tccgggtcat gttcaaattc agaaagaaat gtccccagag gccggatgac  
16081 gtcacagaga aaatccgcat ccatgtcccc ttgcaggcgg aaacggactt gcgcctcttc  
16141 gccaatcaaa atacgctctt tcattttctg cctgtccagt gtcaggacga acaaaatccg  
16201 gtcatagacc ggttcatgcc ggtaaattgc aaattccata ggtttgttcc tttcaatgct  
16261 tatgtaatt ttataattga gttcaatccg ttacataaag agtaccgcag aagtattgat  
16321 ttgtcaagtt taagccgata tgatgattgg cacatggtaa tttcattaca tgacgtacct  
16381 tgacaagtga atgaccgtct gacagggata tgaccggcag gagaagtgc gcatgaagcg  
16441 caccaatgca gggatacgc gcaggaatgg ggcagccgca gggatgcggc tatgaggata  
16501 acggctgtca ggcagaacgg cgaaaggaaa caaaaatttt atcaaattga ataacaggag  
16561 gaacaacaaa atgagtgaag gcaagagact gaaaaactac gacgatctcc cgctggtgct  
16621 ggatgtggcg gacatccggc gtattatggg aatttccaga gtgagcgctt acgagctggt  
16681 tcacacgccc ggttttccgg cgttcagaag cgggaggctg attaaagtca gcaaaaaggc  
16741 gttctttgac tggatggcaa aggggactga aaccgtaccg gaaagcgaca aatgaaggaa  
16801 aggtatcttc cctgtctggt aatattaccg gcctttttca aggggcatac agaggggaaa  
16861 atgccccaaa atgacaccga aacatgacag taaaacggag ggaacagcaa atgccgagaa  
16921 tgagtaaaaa acgtaaggaa gaactggctt tcttctgaa tgaccgcaac cgtgtcattt  
16981 ataataaact gtgccggaaa tgccgcata gctgcaagca gagtttccgg gtgcagctga  
17041 tcgaatgccc gcagtatctt tcaaagcggg cggcgatccc cgtcatagag ccggatgatc  
17101 ttccaccggc ggcagacggt gatttccaat ttcggcagga aattggaaac cggcagaatc  
17161 ggaaataaga cagctccatg ctggcagttt ccgattttgc cgggcgggag tacagagggc  
17221 gcagcccttt gtgccgggta cagggcggca gcgcctgtgc agagtgtaga ggcagcagc  
17281 ctttactccg gtgtccagag gtggaacc tcggcccagg gaaagttgat gtgtgcgtca  
17341 acttatactg ggtattacct gacgcagact ttcgaggat ttgcggcttc gccgcctcc  
17401 cccggccccg gaacatcttt cgcaggaagg aggaaatctg tttgaaactg acacgacaca  
17461 atgggcgctc cggcaagcat ggcacttaca atccccgta caatgaccgc cggttcagat  
17521 tggagaacag cgaacacatt gacgctgacc gggccagaca aaatatctac tgggactgct  
17581 accgaggctt taccacccat gagttccggg agaaccgga acagccggat ttacgctttg  
17641 aggaaattga gcggatgttc tactacgagc attacggcgg ccatgtggag gcccagaacg  
17701 cccgcaatga gaaaacacgc cacacggagc gcaaccgtac tgtggaggac ttgctgaaaa  
17761 ataacaagac ctgcccggaa gaaacgctct accagatcgg aacaatggaa caatctgttc  
17821 caccagaaac gctctttcgc atcgtcacgg aatttcagga ggaattgac cgccgcttcg  
17881 gttcccatgt ccatatcatt gattggcgc ttcatctgga cgaagccacg cccacattc  
17941 atgagcggca cgtctttgac tgtgagaacc gatacgggga actgtgtccc cagcaggaga  
18001 aggcgctgga agaacttggc gtcctctcc caaaaccgga caagcccaa ggccggaaca  
18061 ataaccgaa gcagacctt gacgcatct gccggacact gctttttgac atctgccgca

18121 ggcattggcct gcatctggat caggagccgt cctacggcgg gcgggactat ctggaaaagc  
18181 aggattatat cctgatgaag cagaaagagc agcttgccgc gcaggagcag aaactggaag  
18241 aactgacgct caaaattgag gacgtggaga cgctgttaga tgatgttcc gatgtggcct  
18301 atgacaaggc ggtggaggtc gtgaccgata ccgtccggca ggagacgcac aaagaagata  
18361 ttcgtctgat tgaggatacg aaaaaatggg tactttcgcc ggagcgcaag gccccgaaa  
18421 aggaacgtga ttacgccgct gccctgtggt atggggatcat taccaaaatc aaaaacgcta  
18481 tgcagcatgc tctggcaaaa atccagcggga cgctgatgca gccggagatc aagcaggcca  
18541 ggaaggagca gatcaagaag aaagccaaag aatccattat ggataagctg gcaaaaggaa  
18601 aatcagcgc tgatcggaag aaccgggagc gctgggaacg tgaggggagc attgccccg  
18661 aaaaaagaa cgatatggag ctatgaggca tctgatttc tatggaaacc ggggtccttt  
18721 tgctctgtct ggaggtgaga aatcgaatg tgttgaagc agtaaagcag gctgtccca  
18781 caaggcaggc tgcggaatct tacggggtgc aggtcggcag gaacgggatg gcctgctgc  
18841 cttgcacga tgacaagcat cccagcatga aggtgaccg ccgtttccac tgttcggct  
18901 gtcaggcggga cggggatgtg attgattta ccgccgtct gtttggctg agcagtaagg  
18961 aggcggtgtt gaaactggcg gatgatttt ctgtccgcta tgaccgcaaa ggccatgacc  
19021 cgccccgag aaggccggtc aagcgaaaa tcagcgagga actgcgctac cggcaggcgg  
19081 agcagaaatg tttccgcta ttgtgcgatt acctgcatct gctggaacgc tgggagcagg  
19141 aatacgcccc gcagaaccg gatgaaacat ggattccgct gttcgtggag gccctgcaaa  
19201 aaaaatcgt cacggagtat ctgctggata ttctctgtc cggcagcata gaggaacgtg  
19261 cttccgtggt cgctgaatac ggaaaagagg tgaggaagat tgagcagcga gtatcagagt  
19321 ttaccgccag ctaccggga gccctgatg agcgcagccg aagccttagc accggagcag  
19381 agcgttgacg aagtgcggga aagccttcc gtacagcaaa aaggtcagcc cgccaacacc  
19441 attgaaaact gccagacggt gttctgccac gatccgctg tgcgaggggc gattcgtcta  
19501 aacatttga ctgaccgggt ggacattgtg cgggatttgg gctggcgcag gaataccagc  
19561 gccctgacgg atacagacgt gaagtatct cttctctatt ttgagcagac ctacggcctg  
19621 accagcgaga agaaaatgac agcggccctg tccatcgtgg cgaatgaaaa ctgctacat  
19681 cccatacagg acgtgctgaa cagcctgtc tgggacggga cccccgcat ccgtcctgt  
19741 ctccatcatt tcttaggtgc agaagaaagc gactatgtgg aggaaatgct gaagcattc  
19801 ctgctggggg ctatccggcg ggtgtttct cccggctgca aatatgagga aatgctctgt  
19861 ctggtgggag gacagggggc tggaaagtcc agcttctcc ggctgttggc aatccgggac  
19921 gaatggttt ccgatgacct gaaaaagctg gacgatgacc ggggtttct aaagtgcaa  
19981 ggccactgga tcatcgagat gtcggaatg ctggctacca gcagcgcaa aagcattgag  
20041 gaaatccgat cttcatcag ccgccagaag gaaacctatc gcacacccta cgaggcccag  
20101 cccaaagacc ggctgcggca gtgcgtgtc gccggttct ctaacacgct ggacttttg  
20161 cccctgacc gggccgggaa ccggcggtc cttccgatca tgattacc agagaatgag  
20221 gaagttcaca tttggagga cgaggacgct tccagagcct atctgttga ggtctgggcg  
20281 gagccatga cgatttaccg cagcgccac tattcatga agttcagcaa gtctatccag  
20341 gccagctgg tggaggtaca gaaggattc atgccggagg acaccaggc cgggagata  
20401 cagggtttc tggaaacta caccggcagc atggctgct ccaaacagct gttcaaggag  
20461 gcgctgggcc acacctatga cgagccgaag cgggtggcagc tcataatat caacgagatc  
20521 atgaacacgg tggtagcggg ctggaagccg ttctctaac cgagaatgtt cgccgatac  
20581 ggcaggcaga agggctggga acgggatgtt tccggcaac aactgcccgg caacgaagat  
20641 ggatttggg aactgagcga ggaagaatgc cgccagttg agcttcaaaa ggagtggatc  
20701 gcctgaaaat agcggctgtg tgccgggatg gttgctgct ggttgcggg ttcgttccg

20761 ggTTTTCCC tGtctGgata cggGaaaagc ctGtaaataa gggatatttt tatcattatc  
20821 tttatctccg gcaacgaaag caacgagatt tttcaagaaa attcacaag taagatttgc  
20881 gggccagacg gtagtttaca ggTTTTcaga ggTtcgttgc cggacttctg tgccggaatt  
20941 gccgtccggc ctgcctttct atggaggtag cctatggaaa aaagcaaaaa tcagaagaat  
21001 aaagtccgtt ttgtgggtgt gcgggagttc tccggggaga agtccatgcg ggaagcctt  
21061 gagcagctga tcgagcgcca gacctgtgaa cacttcaag aatggcgtca gcagcgcgaa  
21121 atggcagaaa aagcggcgca aaaacggttg attcggggac aggggcatgg tactataatg  
21181 gtatcgtgtc cctgttata gaaggagaac gctatgagca ggaaaaaaca agtctatgaa  
21241 aaaatcccg ctctctactg ccgtatctct ctggatgatg gcggcgacaa tgagagcatg  
21301 agcatcagca accagaaact tatgtccgg gactttgag aaaagcatgg gatgttccag  
21361 tatgagtatt atgtggatga cggctatacg ggccgcaatt tcaaccgccc tgccttccag  
21421 cgcatgatcg ctgacattga ggccgggaaa atcggctgcg tcatcacgaa agacctatcc  
21481 agacttgta ggaactatat cgaagctgga agctatatcg aatctttt ccaaaacac  
21541 aatgttcgct atatcgccat cacggacggc gtggacagcc tgaccctca ggaaatggac  
21601 atcacgcct ttaagaatat cctgaacgat atgtatagcc gggatatatc caaaaaggtg  
21661 ctggcagggc gcatgaccg ttccagacag gggaaatag gcggcggctc gacacctc  
21721 ggtctgatgc gtgaccgga ggacaaaggg catcttatcc tgaccgga gacagcgccc  
21781 atcatcgca agatttacga ctatgcctg gacgggctgg gctgcatgag gatttccaaa  
21841 cggctgatgg aagaaaagat cccgattacc catgtgaagg caaacacaga atgcgacgcc  
21901 aactattatg cctggggcgg ggcgagaatc agccatatcc tgcgaaatcc cttttataa  
21961 ggtgcacatc ttgtctccg gacacatcag aaaggcatcc gctcaacac ctatgacatt  
22021 atccccgtg aggactggga agtgattgag ggctgccacg aagcgattgt gacgccggag  
22081 gaatgggagc aggtgcagga aatcattgac cgcaggcca ccattatgaa aggcaacgcc  
22141 tgcccctttt ataatctgtt ccacgggctg gtctactgtg ctacctgagg gaagtcctg  
22201 caggtgcggt atgaaaaagt gggccggact gggaagaacc gattcaccg cgagatgagg  
22261 gagccgattg acaaggcgta ttatatctgc cagacctaca accggatggg ttgtaaggtc  
22321 tgctccagcc acaagattga agcaaggat ttgtataatc tggctgtaaa ggatatacag  
22381 gaattggcgg cgcaggccat gaaggatgt gatgcgttct atcagcggct cagcatccgg  
22441 atggagcacc ggtatctggt ggacgctcc cagacggaga agaacgcaa aaggctggag  
22501 gtcggaatc aggaaattga cgggatgtt ttgacctat acacggataa ggctaaaggc  
22561 atctgaccg agcagcgtt tatgaagctg acggcggcgc tggaacagga gcaggaagcc  
22621 aacaaaagc gcctgatga tctggcagt atgcagagcc gggttgacgc ccaggaagc  
22681 gaagtccgca ctttattaa ggaatccgg cgctatgcc ccattgagga actggacgag  
22741 gcggtgtga accggctt atcagcaagatt ctgattggcg aagtcaagaa ggtggacggc  
22801 cagaaggtgc aggaagttaa aatctttat aactttgtc gggaaatccc aggaattaac  
22861 tgacgataa gagcagcaag gccctctca tgccggggag ggccatttt agtgcgccag  
22921 gcgggcgcac gttctatatt ctgattcaa cacctatggc tatcacctg tgtgggaaa  
22981 cccgtaata tctttgaag gtctctgaga aatgactgat attcgtatat ccgacagtaa  
23041 aagcagcctg actcacatta tactgcccgt ctgaagtaa tacatatgct ttctcattc  
23101 gttcttctg gatgtactga tagattgtt ttctgtaata ttgcttgaag aggcgcttca  
23161 tcttatagtc atcatccgg attaagtggg aaagctcctg aaggagggt ggacaatcta  
23221 atcagcggat gagaatctc cgggcattat ggaggcattc catatctgcg gcagagagag  
23281 aaagagggcg ttttcttc caatcggggc atatgagccg ttcgatatt atggaaagca  
23341 actcaacac ttgactttcc acaaaaagt gattcaactg atccttggc atttcattt

23401 cggtgtcaag cttgttcagc aatatttctt cctgtacatc ttgacaaaag gaataatac  
23461 ggcaattaa attttgaaaa gcggagaaat tttgtcctt tttcccag actgcttcac  
23521 agaaagcatc aatatatgt ggttcaacc aatagagaa tgcctaatt tcgtctccac  
23581 attgatactc tgaataact ctggtttccc ctaaaaaacc caaattagaa taaccgggtt  
23641 tgacttcaac aggaacgtt cctacctcac tgtacaaaga attttctga ctatatgaa  
23701 gttcaaaaat agaaccagta gtagctgtca cccactgaaa ttttcgatct atgatcccgg  
23761 aagaaaacaa aagatgaaca ccaggtcgaa cttcaatctg cctgcgcaat ggaaatccag  
23821 atgacgattt gaattcaga gataagtcgg acatacggca cctcatagct aaaccaattt  
23881 gcaatttga aactcagtt tctctaaac atagtatagt tagttgtgc taactgtca  
23941 agctgttaat atccccttag gggcaaaaaa aatccctctg ggggcagaaa gtggtatga  
24001 aatgtgttat tattcgtatt gattagttga tactaacaa taaacatc taaacaagga  
24061 ggacaatcaa tgaaaaaaat gttgagtga ttgctttgt ttgcgatgct attcagcatg  
24121 gcggcttga caagcggcac aggaacaaat gacactcag aatcgcagtc aggtgaagca  
24181 gaaatcac aaacggagca gaacggagac acgattacag taacggacat gaagggaact  
24241 gttgaaatcc cagcaaatcc acagcgcatt gtagatactt ccggctctgc cgatgaactg  
24301 atcattctg aatgccttt tctcggatca gcaatacta gcatgttga ttccactacc  
24361 gttcctgaat atttgcagga atactttga gaaaacaac tggaaactgt gggcaattat  
24421 tcaggctccg ccggcgacct ggatctggaa aaaattgag agttggagcc ggattgatt  
24481 attatgaata tccgccaga caatgtttac gatcagatgt gtgaaatcgc tcccaccgtc  
24541 atgctggacg atgatcag ctatgtaaac tggagaggtc gattccagca actgggggaa  
24601 tggttcggga aagaagatgt gttgaggaa tggcttgcga actttgatac acagccgct  
24661 gaatatcgg aacagctcaa agcggtcaca ggaaatgaaa ctttctgt cattgaagca  
24721 aactccgtgc gttctggaac atattacgtc tacagtacag gaggccctgg agaactgatt  
24781 tatgacgctt tggagcttcc ggcatctcc ggagtgccg aggatgtctg gggcgaagaa  
24841 gtagatcgg aatattttt ccaaatagat gccgaccaca ttcttact tagcgatgac  
24901 ggaacagtag gcgatacggc agatcttccc acctggcaaa attgaaagc tgtgcaggca  
24961 gggaaactgt actcgggtgt caacgaacag cagtatgatt tggcttatac gcctaacggc  
25021 aagttgattt acatggagcg gatagcaat gcaatcctca accacaaaa cattgatgag  
25081 taaaaagcgc tttcgggtg gatccactgc ttcgggcag tggatccact ccaagaccgg  
25141 atacatcctt ttttgctga ttttaactgt actttaatt gcttctgcac ttatagcagt  
25201 aggcgtaggt attgccggg ggagcgttc ggaattgat cactactctc tacacttga  
25261 tctgtccaca tcgcttcac agatcatgct ggaaatcgc ttccaagag ttgctccgc  
25321 ctgtatcacc gggggggtt tgcactgtc tggcactgt atgcaggaa tcactgcaa  
25381 ccctctggct gacgccggc ttttaggtat caatgcagg gcttgcttg ccgttacct  
25441 ttgactgcg tcttaccga cactatcta taatgggtg atgggtgcag cgtttctgg  
25501 cgcaactgta gcagccctaa tagtttacgg attcggcgc aagaagaaaa aagccgatcc  
25561 gattcggcta atttggcag gttcggctgt tcatcttt ttaacagctc tcagccaagg  
25621 aatgtctctc gatttggcc tttctaaaga ctttcttt tacacggcg gtagccttc  
25681 cggaaactc tggcctcagg tcaaagcagt gactccctgg ctgctgatag ctgttataat  
25741 cggacttct cttgcaccta aactatcat cttggcgtg ggcgatgaaa gcgctcagg  
25801 cctcggagta aatgtcggc ttgtcgtgc atttggcctc tttccgtg tgctattggc  
25861 cggggcaagt gtatcgtgg ttgaggcat atcctttgtc gggattatta ttctcatgt  
25921 agcacgaaaa ctgtagggg cagattatcg acggctagcc cctgctgcc cactgatggg  
25981 ggccgtgctc ttgacttt ctgacgttc ggcccgatg ctccaagcac ctttgacac

26041 cccgacagga gcgctggttt ctgtgatcgg tgtgccgatt ttctattgc tgacctatcg  
26101 gaatgggggg actaagttat gagaagaaag cgacatgcc tgatacaatt catcttagtc  
26161 cttggcctca tcgccaccgt gctgctttca cttaacagcg gatactaca gactggcctc  
26221 gctgacctgt ggggggcaat taccggtacg gcagagaaaa caagcacact gattctgtta  
26281 aagatgcggt tgccaagaat catattggcc gttttatgcg gtatgggact ggctctgtct  
26341 ggctgcactt tgacagaccgt gacagataat tctctggcag atccagggat cattggtatt  
26401 aacgctgggg caggcttttc cgtcatgatt tttatgtgga tgtcccgtc cctgcatatt  
26461 gacaccaagt tctatcgccc cttgtttgcg atgatgggcg gtctgctgac agcattttc  
26521 ctttataact tcgcaaacg agacggcaga atacgcccg cgatttctt tcttggtggc  
26581 attggcgct cagctggtt cactgctatg atgacatat tgggaacaaa tatcaacagc  
26641 tccatttatc aatggttca gcgctggctt gtgggcaata tttgggttac tgattggtat  
26701 cagatcaaga ttctgttcc ctgtctgctc gtattggtt cgcttctt ctggcgggtt  
26761 aatgttctcg atcttcttt gctgggagaa gattcagcgt ctgcattagg cgtagagtc  
26821 ggacaagagc gcagggtgct actcttctt tctgccgcac tagccgcaag ttgcgttgcg  
26881 gtcagtggag ggatcgggtt tatcggctg gttgcgctc acattgcccg aaggattacg  
26941 gaggtgcggc accgcaattt gcttcttact tctatgctga ctggcggaat tctgctggtg  
27001 ctggcagata cagtggggcg catcctgtt tctgggatag aagtccggc aggtatcgtc  
27061 atctccatat tggcagcgc atatttctg tatctgctgc acaagcaat ttaaggaggt  
27121 gggtttgatg caacggggaa tcgtagcgga aaattgtcg gcaggttatg gggacacac  
27181 tgttttcaa aatcttaatt tgaataatt gctggcaaa atcacaacgc tgatcgaac  
27241 aaacgggtct ggtaaata caattctaaa gacgctgtcc agattgctga cacctgaaga  
27301 gggaactgct tgcttgatg gcgactgat cttcgtatg tcaacaagag cagtggcaca  
27361 aaggctggca gtgcttcac aaggagcgca ggccccagc ggcattacgg tgaagactt  
27421 ggtcgagtac ggaagatc cttaccgtaa aagactatct ggctgacca gtgaggatga  
27481 agaaattatt aagtgggcta tggaaagtac aaatatactg aatatggctg gccgggaaat  
27541 ggatcagctc tctggcgcc agaagcagcg agcatggatt gcaatggctt tggctcagaa  
27601 aacaggaatc cttttctgg atgaacctac gacctatctg gacatttctc atcagttgga  
27661 aatctgacg ctgcttaaac aattaacag gaagcagggt gtgacggtgg ttatggtact  
27721 gcatgatctg aatcatgcta tcatgtttc cgaccattg gtgactatca agaacggaga  
27781 aaaatatctg gaaggtccgc cggagcgggt tgtaccaca catatgctgc gagaggttt  
27841 tgatgtgaa gcggtggtta ttcaacatcc tgtgttgaat tgccagat gctgcctta  
27901 tgggtgctg gatcaaat tggaaaact tgatagctga atactgata ggaaaagaac  
27961 tttcgagaa atggacata acattgaca tagcgagtca gcttgaaag gaaaaattt  
28021 gaaagcccta taaatcagg gctgaagatt ccgagaatt ataaagagag gaggaatgtg  
28081 attgaaaaa gcaatcaat ctgtcaagat tgctgacgct ggctggaggg cataagaagc  
28141 tcacatttct gggctgcgct cttccggga tcgcgcggt actcggcctg attcctatg  
28201 tgtgtgatg gctggcgca agagatgtc tggctgccta cccggacgtc acgggagcct  
28261 ccggcatcgt ccggtggggc tggatggcg tctggttgc cgtcgcaat atcctggtt  
28321 actttcggc gctgatgtg acgcatatc ccgcttccg cacggcgcg aatatcgcc  
28381 atacaggagt tgctcatatt ctggagctc ctctgggatt cttacgggg aaccagtccg  
28441 gaaggctccg gaagatc atc gatgacaat cggtctcac agaggacctg ctggccata  
28501 agctgccgga tctgacggcg gcggtggtga cgccatagc ggctgtgatt ctgctttt  
28561 ctttgactg gaggatggg cttctctg ccgtgacct gattctggct tttgtgtgca  
28621 tggccagcat gatggcgcg aagaacggc gcttttcca ccgctaccag caggagatcg



28681 agaaaatgag cgcggaggct gtagaatatg tccggggaat cccggtggtg aaggtgttcc  
28741 agcagacat atattcctt aaggccttt atgcggccat ccagctctac agcgatctgg  
28801 ccagccagta tgcatgagc tgccggaacg ggcagacctc atttctacc tgcatcaacg  
28861 gaggcttgc cctgctgata ccggcggccc tgcttctggc ttccggcggg aacgtctggg  
28921 aagtgtgac agactttatc ttttacgcc tgttgcccc ggcctgcggg gccatgatca  
28981 accgattat gtatgcctcc gagtctgtca tggaaagaaa tgaggctgta atgaagctgg  
29041 atcatattct ggagcagaag cccctggagg agacggacca tccgaagaag ccggggaacg  
29101 agaccgtatc cttcagcat gtgacctc ggtatcccgg cacagagcat ccggcgtga  
29161 aggatgtgag ctttacagta aaagaggga aatgtaccgg actggtgggt cttccggcg  
29221 ggggaaagtc cacggcagcc tctctgatcc cgcggttctg ggacgtccag ggcggccatg  
29281 tgcggattgg cggcgtggac gtgcgggata tggacagccg ggagctgatg aagcatgtgg  
29341 cttcgtctt ccaggacacg aagctttcc aggtcagtct tctggaaaat atccgtatg  
29401 ccaggccttc cgccacagt gaagaagtga aggcagctgc ccatgcggcc cagtgcgatg  
29461 atattctgga aaagctgcc gcaggcctcg aactgtggg gggaacgaag ggggtctatc  
29521 tctccggcgg cgaggcccag cggattgctg tggcgcgggc gattctgaag gacgcgcca  
29581 tcgtggtgct cgtgaggcg accgcattcg ctgacccga gaacgaggcc ctgattcaga  
29641 aggcgttag ggagctgacc agaggaaaaa ctgtgattat gattgccac agactctta  
29701 cggtcagaa cgagacaag attctggtga ttgacaagg ctccgtcgg gagcaggga  
29761 gccatgaaga gttctggc gcaggcggac tgtatcgga gatgtggtcg gattatcaga  
29821 aggcggcggc ctggaaggta gaaaggggtg aggagatatg attcagggc ttcggcatg  
29881 attgccctc agtgaagggt gtgcgaagga tttcgtaaaa gcagtcatct ggtgctttt  
29941 ctgcaatc agcctgatgc tgccgtagg cgtggttatg gctgtgattc agtatctgt  
30001 ggggacgctg gaggcaggag gaaaccggc ggagggctta tggctctata caggagcggc  
30061 agttctggtc cttctggtcc tgtcatct cactatttc cagtacgcg ccctgatct  
30121 ggctacttac aaggaaagc cggcaagaag agtgagcctt gcggaacc tccggcggt  
30181 gccttaagt ttttcggaa accgggatct gagcgacctg acggcgacca tgattcgga  
30241 ctgctcagc ctgatcaga tgtttcca ctatatccg caacttttg cttcatctt  
30301 ctctacgctg gtgattgaa tctgtatgt tgccatcaac tggagaatgg ctctggctgt  
30361 gctctgggtg cttccggtg cggttctt gacggctggc tcaaaaaac tccaggatat  
30421 ctgcggcaca aagaatattc tggcaagag gacagtcgag gacaatatcc aggagtgcct  
30481 ggagaccatc cgggatatca agcctgcag ccgccaggag gaatacctaa agggactgga  
30541 cggaaaactg gaatacggc agcgtcgc catccgctcc gagcttgcca caggcgttt  
30601 cgtgtgctc gccaggcgt tcttacgat cgggcttgc accacggtgc tcacagggc  
30661 cgggctctg atccggggag atcttctt cctgtattt ctgggcttc tgtcggc  
30721 ggcaaggctg tacgatccg tgggaatgt tctgcagaac atcgggcca cattaacg  
30781 caagctcag atcaaccgga tgcgggcat cctggagcag cctgtccaga ccggggcggg  
30841 tacctgtgag ccgacaatt atgacattac cttgaccgt gtgaagtct cctaccggga  
30901 gaatgaaggc gtgctggac acgtatcct tacggcgaag caggagagg tgacggcgt  
30961 tgtgggacc tctggtggag gcaagtccac ggctgcaag ctggccccc gcttctggga  
31021 tatccaggc ggcaggatta cctgggagg catcgacatc tcaaggtag acccgagggt  
31081 cttctgaag cattattct ttgtattca ggatgtggt ctgtccggg atacgattt  
31141 ggaaaacatc cgctgggac ggcggggagc tacggatgag gaggtctac cggcggcaaa  
31201 ggcggcatgt tgcgacagt ttgtccggga tctgcccgg ggctatcaga ccatggtgg  
31261 agagaacggc tccaccctt ccggagggga acgacagcg atttccattg cccgcctt

31321 cctgaaagac gcgccggtga ttctgttga cgaggccact gcctccctgg atgtggaaaa  
31381 tgagacggct gttcaggagg ccatctccc gttggtaaag aacaagacgg ttctcatcat  
31441 cgcccaccgg atgcgtactg tgaccggggc agataagatc atcgtgctat ctgacggtca  
31501 tgtggccgag cagggaagac cggaagagtt gtatgagaag aacggccttt acacccatat  
31561 ggtaaggctt cagaccaga gccagagatg gactctggag acatgaaaag aacctgagga  
31621 gtaaaaccgc cggcgcgcag agggctgtat agtcttgtat acagacgctg ccagaaaata  
31681 cataagaaa aacgactgcg gcaggatata ttcaggtgtg accaggggat atatctgtcc  
31741 ggtctgcttc ctgaagcaca gcctcaact gattcagata ttttaggcc acttgaaga  
31801 gggcgtgtc agggcaaaat ttcagcaaat cggatacga agcatcctaa taggcagcat  
31861 gttctcagg attactaggt gattaanaat tggcgcagc cgattgaaat aaaatataat  
31921 caatcggcct cgccgcgaat tgtgagcgt ttgtccagt ttaaggaca aataagtggtg  
31981 tgcgttttg agatagagg ctgaaattct tataaatca ggactaaaga ttccgaaaat  
32041 ttatagttat tggcaggagg aaaacaagt atgaaggca tgaattttt atctatggca  
32101 gcgatttgc tctttggcag tgcgtgctt ttctccggg gctctgaatc cggaaaatca  
32161 agtggcgtat atcagcctgg aactatacc gctagtgtg aagggtatgg aggggacgtg  
32221 actgtcgaag taaaattga cagcgaagt attctgtcc tcacaattt agatcaaac  
32281 gagacagaaa gggatcaga cgggcttta gaagaaatcc cagaacgaat tgtggaggca  
32341 cagaccagc aagtgtatc gattacaagt gcaactgtca caagtgtatc gattaagact  
32401 gctgtaactg attgtatcc acaggccaca caggaataag gaaggggttc caacaattca  
32461 acagaagtga agcatgatg actcgtgggt atgcctgac attacccta gtgtgctgaa  
32521 cacgatgtct tttcacgg tctaaaaat cttatttca caaagaagag gctgtctatt  
32581 tcccagacg ctctcttta gaattagta atatgggatg ttgcctatca gctcttttc  
32641 tactggatat gttggaagt gaaagatgc agacaaacac acagaaattc tacttaaac  
32701 cttctctaa cggagagagg ggtgttttt tcttttgaa ttcactact gacattgtg  
32761 caaagagctg atgagccagg acgaaattg aacctggac ggaggcaagt gtattttgca  
32821 ggtgcgcgg gtgaggcct tttcagtga gaaatacagc attaccgcc acccccgcta  
32881 tcaatactc tcggatgcc acaaacagaa cacctttagt gtggacaggt acttgcgtc  
32941 cctgcgccg aaaaaacggc gcgtggtatc ggaggatgaa accttgacc tttacgacat  
33001 tgacctgctg gacgaagatt tagccgccca gtgaagcggc tttttcctg taatcaatca  
33061 aatttggctg ccggaaccg gcagaaagt aggcatatat ggaattttc aatagtgcag  
33121 tggatacgtt acagaccatc gttgtgggccc tgggcggggc gctctgtgta tggggcggcg  
33181 tcaatctgtt ggagggatac ggggcccaga accccgccag caatgctcat gtgtgtaaa  
33241 gtagcaacta agaatttagt agacagccgc tgactattcc gttttaact ttagttaat  
33301 ttctaaatc atcatttaa caacggctct attgttcctt aaagcctacg ctgctatcat  
33361 aaaagcata acacaaggag gtttgctat gaaaatcaat caaattatcc gagaaaaacg  
33421 gaaagaattg tcattaacac aagaacaagt tgccgagctt ttaggtgtat ccacccggc  
33481 tgtaaataag tgggaaaaag gtagcacata tccagatata accctttac cggctcttg  
33541 ccgttacta aaaatggatt tgaatacct gttgtcattt aatgaggatt taactgatg  
33601 agagattgaa aactttgca atgaactga taaagttgtt caagagcagg gctatcaaac  
33661 cgctttcag atggcaatc aaaaaatac tgaatatccc acttgtgata gactgtgata  
33721 ttcagctatt ctttatttag atggcgaag atggctttat agtgaccag agccagaaca  
33781 atataggaa acatttga cttttataa aaggctgtcc gtaaatgaaa ttccagaat  
33841 cagagatata gcaattagta tgctaattc ctatgcaaga aatagggcg aatattcaaa  
33901 ggcagaggaa ctaatcaata cgctaccatt ctccacaata gacaaagaag aacagctgc

33961 aattctttac cagcaacaga aaaaatacac agacgcagaa aaattctggg aacacagaat  
34021 attgaacggt gttacggaga tacaaccgc ttaataaat atgcttgaat tagcgttatg  
34081 cgaaaaccgc aatatggatg cagatTTTT tgcggatag tacgaaaca ttactgtac  
34141 gtttctttc ccggaatgga tgcgttaca tgctcattg cagcttgcac tagataaga  
34201 agataaagac gaaagttat ctattcttc aaaaatgtt cctgctatga gaaaagaatg  
34261 gaaatcgag aattgtaagt tgtaccgcaa tttggacgga acagaggtaa cagctcttc  
34321 aagtaaagt gcagattctc tttgcgagga attgaacagt aaagatgaat tgcatttat  
34381 gcgtgattgt acggagtta gagaactaat gacacaaatg aatagttaag catatctca  
34441 attgtatag caaatccagc cgagccagtc aacggcaggt aaatgggctg cgcccaccg  
34501 tgacagcccc gactgtcctt gctggtgggt aatcaagggg cgacagcaaa aagtgtcgc  
34561 gccctttcc ataatcgaag aaagggggat tttccatgac tgaatacga gccatcaag  
34621 aacatatccg ctataccat gatactact gccggattgt tattcgccat gcgtccttg  
34681 acgctgccg tatgtcggcg gcgaggtgga aacgggaaat ctccctgaa ttttgaccg  
34741 aagaaaagt tgtcccacta agcaccacag acgagtatt tcaagtcca gactatggc  
34801 aaacttatcc attctccgc cgggggcaga cgatacttt agatagctgc tccctgcgg  
34861 cggctcttc tggactgcc gaacagacgc aggaggaaat cttttgtat tactccagc  
34921 acttgacgca gaaagaaatc ggggaacaaa gcggctggac acgcagcaca atcggggcgg  
34981 atattcagct tgcttgaag cggctgaaag cggaaatgga ggtgttgc catgagtaac  
35041 cgacttctc cctatgacac taccataaag gcacatgagg gcgacccat agcgatacag  
35101 gctgtcctg accgctatgc cggatatac cgctactct ctaagatga cggctattat  
35161 aactctgata tggaggacta catcagaaca aagctgattg aaagcctgt taagttccg  
35221 ctgaccgtt gagtttggat tgatgatag ataaaattag tccaataat gcgaacggga  
35281 ggtagtatg aaaaaatta tattgatagt ctgtacatta gtctttcta tatcttaac  
35341 tgcgtgtggc aaaaattt atggtagtc tactggaaac gatagtgat ttatcatgga  
35401 atatagtgtg taaatacaa cggacgcaca ggatttaact attgaagctg gagatactat  
35461 tagtgctaaa attgtagtag ataaaggtg cttatcaata aaaattcaaa aagacgggga  
35521 aaaacctatc tatgaaagta acggaattc cacatctaat gagttttagt ttgaaattga  
35581 tgaagcggga acatacacag ttgaagtaac aggaaaaaaa gcaaaaggaa gtgttagtt  
35641 catagtgcag agtaattgat gaactccag ttactacac tgaaccacca taaaactga  
35701 atatccgcc gccccgagc ggcagcatg agcagtaaat ccgaaaaaga ttgctgctt  
35761 ttttacgcc tttttggc aaatttcaa atgttccgta ttagatagt aaacccaaa  
35821 aaggctgcca tttttcaga cagcgggtaa aacacagtt ccaaacgcc ttattatcg  
35881 gaaaacat gccgcaggaa aagtcttc cgaaaagtct gctattttg cttttgcgg  
35941 tttttaggg agtaagggga gaacgccagc ccgagcctt ttataaaaa gctggtata  
36001 gattccccg aaaagtggca gcagcaagt aacggcagtc tgacagttc ttagagcaag  
36061 attctaccg ggtgcaaaa ttcgcttct gctattttg ccctgcggg aatctgtg  
36121 gggagtgcct tccccaaac ctgcttatac ggcttgcgc gcttaaaaat ccctcaaat  
36181 atttttcgg attttcaaa aacagttcc ctttacacc tgttttctc ctattagtga  
36241 gaggacacca gcacagaaa ggaggtctgc gcacctgaa acgatacaac acgccgacc  
36301 gcagccgggt agtcaaaaca cgcagaccg aggaagaata cgccgagtt gcggaaggc  
36361 tttctcctg caacatgagc caagccaggt ttatccggca agccataacc ggggcagcca  
36421 tacgccccat cataaccgtt tccccgtca atgatgagct gcttgcgct gtcgggaagc  
36481 tgaccgccg atacggcagg atcggcgga acttaaatca gatagccgg acgctgaacg  
36541 agtggcacag ccctaccg cagcttcca gggaggtac ggcgcggtt tccgacctg

36601 ctgccctaaa gttgaagtc ttgcagaaag tgggtgacgc tgttggcaac attcaaacat  
36661 atcagctcta aaaatgccga ctatggcgca gcggaagcct acctcacatt tgagcatgac  
36721 gagtttacca tgaagccac cttgatgaa aacgggcggc tgataccgag ggaggattac  
36781 cgcatttctt ccctcaactg cgggggcggg gatttcgccc ttgcctgtat gcgggcta  
36841 ctccgctatg agaaaaacca aaaacgggaa gatgtgaaaa gccaccacta tatcatcagc  
36901 ttgaccacac gggacgggac agacaacggc ttgaccgtag accgggcgca ggagtgggc  
36961 gagcagttct gtaaagagca tttcccggga caccaagccc ttgtatgac ccaccggac  
37021 gggcataacc acagcggcaa tatcatgtg catatcgtca tcaactcct gcggattat  
37081 gaagtcgac ttctgccta catggacaga ccagccgaca cacgggaggg ctgcaagcac  
37141 cgctgtacca acgcccctac ggaatattc aagagcgaag tcatggagat gtgccaccgg  
37201 gaggggcttt accaaatcga cctcctaagc ggacgcaagg aacggataac ggaacgggaa  
37261 tactgggagg caaagaaagg gcagcttgc cttgataaag aaaacgctgt cagagaagca  
37321 gcaggacagc cgaccaagcc caccaagttt gaaacggaca aggcgaagct gcgccggac  
37381 atacggcagg cactttcca agctggtaac tttgacgagt tttttcct tttgctgagg  
37441 gaggggtgta ccgtcaagga gagccggggg cggcttctt acctcacgac ggacaggaca  
37501 aagcctatca cagcccggaa gctgggggac gattttgaca aggctgctgt cttgcccctg  
37561 ctacgcgaga acgcccacag agctgccgaa cagaccacag ccatacaaaa atacccac  
37621 acccaaaagg gacgcttga ggaagaaaaa gccgcaaaaa ccacccggc agacaacac  
37681 ttacagcgca tgggtgacc ggaagcaaag cgagccgagg gcaagggcgt aggctatgac  
37741 cgctgggagg caaagcaca cctaaagca atggcggcta ccgttacagc ctaccagcag  
37801 tacggctttt cttcccggga ggaattggac gaagcctgt ctgccgcta tgccgcatg  
37861 caggaaagcc ttgcagagct gaagcaggtg gaaaagacgc tgaacgggaa aaaggagctg  
37921 caacgacagg tgcttgcta ttccaagacc cgccctgtcc gggacgggct gaaacgacg  
37981 aaaaacgcca aagcaaaatc agcctaccgt cagaagcacg aaagcgactt tatcatagca  
38041 gacgcagccg cccgctattt cagggagaac ggcatttcca agctgccgag ctataaagcc  
38101 ctgcaagcag agattgaaac cttatcaaaa gagaaaaaca gcggctaca cgattaccgg  
38161 gcaaaacggg aggaataccg ccgttacag actgtcaagg gcaatatcga ccagattta  
38221 caccgggagc gcaagcctgt gaaaaggcag gaacaggaac gataaaaacc gcccaaaa  
38281 gtaccgcaac ccatacagaa caagggggct gccccatacc ctatccgcaa taccaagga  
38341 tttttaacg gtcttacagg gcagaaaaac cccggaaatg ataccgagat gatacagaat  
38401 taccgagat accgtcacac cagcggaaac ggcagaaagg agcgcacca tgccaagaat  
38461 gagcaagaaa cggcggctgg aatggtcttt tttctgagg caagtgaaag tcgggaatgc  
38521 cacctgagc cgtatcacat acaacgacct ctgccggggc tgtaccata gctgcaagca  
38581 gagctccgg gcggttatca tactctgccc ccgtactac tccaaacgcc gaaaaagga  
38641 ggacagggac aatggcagat aaccgcaagt attactacct caagtgaaa gaaactttt  
38701 ttgacagcga ctccattgtg ctgctggaag atatgaaaga cgggatttta tattcaata  
38761 ttctctgaa gctgtactta aaatcgctga aaaacggcgg gaagttgac cttgacgagc  
38821 atatccccta cacagcacag atgatagcga cactgacccg ccaccagata gggacggtg  
38881 agagagcttt agagatttc cggcagttgg ggctgtgga gcagcttgc agcggggctt  
38941 ttatatgac cgatattgag ctgatgatag gacagtcctc taccgaagcc gagaggaac  
39001 gggctgcaag gctgaaaaat aaggcacttt taccacccg gacaaaagac ggacattgt  
39061 ccgacattcg tccaccagag atagagatag agttagagaa agagatagaa aaagagagag  
39121 agggagaaac gggacacccc gcccccggc cttatggcag atacaacaat gtgatactga  
39181 ccgatacaga gctttccggg ctgaaaacag agctgcccga caagtgggag tattatattg

39241 accggcttc ctgcatatc gcttccaccg ggaagcagta ccacagccat gcagccacca  
39301 tttacaagtg ggcgcaggag gacgctgcca aagacaaggc tgccccgaaa cagggcatac  
39361 ccgattattc atgcaaggag ggcgagagct tatgaaaaac gggattgaag ctatgattac  
39421 ggacattaca gccactaccg ccgaagcgga ggactacaca ggcgaggacg ggctttata  
39481 ctgcggaag tgccatacgc ccaagaagc ctattttca aaagaaaccg cccaatggtt  
39541 agggcatgac cgacaccga cagagtgcga ctgccagcgg gcagcccgtg aaaaacggga  
39601 agccgtgaa agccgacaga agcacctga aacagtagag gacttgaac gccggggctt  
39661 taccgacccc gctatgcgga actggacatt tgagcatgac aacggcagaa acccgacac  
39721 cgaaaccgcc cgttttatg tggagagctg ggaaaccatg caggctgaaa atatcggcta  
39781 cctgtttgg ggcggcgtgg ggacaggaaa aagctacctc gctgcctgta tcgccaacgc  
39841 cttatggag aaagaagtg cgtctgcat gacaaactt gcaacgatac tcaatgacct  
39901 tgctgccagc tttgaggga ggaacgaata tattccagc cttgcagct atcctctgct  
39961 gatactgat gatttcgga tggagcagg gacagagtac gggctggaac aggtttacag  
40021 cgtgattgac agccgttacc gaagcggcaa gccgctgatc gccacgacca acctcacgct  
40081 ggaggaattg cagcaccgc aggacacgcc acacgccct atctatgaca ggtgacttc  
40141 catgtgcgcc cccgtccgct tcacggcag caacttccga aaggaaaccg cacaggaaaa  
40201 gctggaacga ttaaagcaac tgatgaagca gcgaaaggag agcctatgac agaaaccaa  
40261 cagacaagca ccacaaaac agaccgccg ccgactgtg taacggaaat ccgcatgggc  
40321 aactccgtcc ttaccgttc cggcttctc aagcagggcg caaccgacac cgacgccac  
40381 aagatgatga aagtgtgga agcggagct gctacacaaa aaacggcgat ttgaccgacc  
40441 ataaagaagc agattgacg cttttccgc tatacagaca gccgccccat gtggtacaat  
40501 caaggtacgg aatagtgggg ctggctgtcg gaaacggagg atttatgtt aagacagacc  
40561 aaccaaac caattaccg ctttaccga agactttcc atgaggacga gctgcaaggc  
40621 gagagcaatt ccatttcaa tcagaagcgt atcctgaaa cctatgcaaa gcagaacggc  
40681 tttccaatc tgcgctgga cacggacgac gttattctg gtgcgaactt tgctggggtt  
40741 agatagcgt actttttaca tctaccatgt tgcggcggtc atggttgaca acttgcgtcg  
40801 gtcctgtc ggtatcaacc tgcgacaa agctataatg gatttcgatt ttccgggtg  
40861 tggtttccg gtctaattca tgtatcaaaa tacggctgat aaactcatgg acgtttcat  
40921 aggtcaattc ctgtatgtcg ctgtattcc cgacaatctg aataaacctt gatatatccc  
40981 ttttcgctc ggtaacggtt gcgatctgt gttgtaactc gtctatcctt gcggcaaggg  
41041 atttctttc gtctcatag ccggaagtta gaaacacaaa ccgttcatct gtcagtctgc  
41101 ctaatgcgtt gtctcatac agcttgcgga aaagcgtgtc aagttcggtc atacgcgct  
41161 gtgcttgaa aagttcctt tgctgtcgc ctaatgcctt tctcgttcc atgtcgcct  
41221 actcgtagc ttacagata aagtcctgtt cgtgttctt aacataaccg aaaaaccgcc  
41281 gcatatctc cagcactaaa tcaagaagta cgttttgcg gatataatga gaggtacact  
41341 cgctgcctgt cttgccctg ttgcgcatg cgccgcaaga ataggaaaac ttgcgcgct  
41401 cgatatttac gccctgttg taatacatct tatgtctgca accagcga aacagcaagc  
41461 cggaaaaaat atcaatctc gctgctttg tcggcggtg gcgggtagca atccgcttt  
41521 gcgcaagttc aaaggttcc tcgtcaacaa gcggctcatg ggtgttggg aagaaatagc  
41581 gttgttctt tcgttctc cgggtcttt tcgactgta ggatacctg tgagtttgc  
41641 cggttatggt atgccctaaa tattctgcc ttgctaatat gtcatagagc gtttgcg  
41701 gccaaagata gggggcgtc attgcccgt gataccgcg ctgtcctgta cgctgatagc  
41761 gcaacgctcc aatcgtcaag actttgttt ccgcaagca ttttggatt tcgacatac  
41821 gcacgccgct acaaacata gcgaaaacct gttgacaat cggcgcggtt tccgggtcgg

41881 gtataagggtg gtggcgggtt ttcgggtctg ggatatagcc gtatggatat tccccgttga  
41941 cgcgctcgcc tttttcgcc tgtgcctgtt taactgcgcg gattttcttg cttgtgtcgc  
42001 gggcgtaaaa ctggttaaac cagttccgca agggggtaaa ctggttatcc tcccgcgctg  
42061 tgtcaactcc gtcgttgatc gcgatatagc gtactccggtt ttcgggaaat acaatctcta  
42121 tgagttcgcc cgttttcaga tagtttctgc caagacggga aaggctttg gtaatgaccg  
42181 tcgccactcg tccggcttcc acttctgca acatcgcttg cagcccctcg cgctcaaaac  
42241 tcacgccgga aatccgctg tccacaaaaa actttgtgtt caaaaaatgg tgttcgtccg  
42301 catagcgttg aagtatcatt ttttgggtg gtatgcttcc gctttctccg gcttgcatat  
42361 cctcttgact taaacggcag taaagggcgg tgattttatt cgactgtaac attagtctc  
42421 tttccgaca gccgaataaa caggtataat gtgttgctat cattatacca tatcccgcg  
42481 cctaatacac tactcggacg ctaaaaatcc cggatttccg ggctttttct gcaaatcctt  
42541 tacaatgagt ttctcaatct tttatggat tgatcggtt gccttttcac tccgcaacgc  
42601 ttgaacaaga taggtgattt tcctatattt gcgttcggtt gtaattgtct gtttttatc  
42661 cattagaaaa acctcctttt cctgtatgga taaactatat tcgtcaaaag gcaaaaacgg  
42721 gcggttggtta gctgcaacct cacgggagtt tcaccccggc ccatgcttat gggcgcgccg  
42781 cgcaatactt tgagggtgtt caacgcggga gtatcattgt gccgccttgt atgtcgtcgc  
42841 ccacaagctg ctaaactgtt ttaacggcgc ggtagttctc gctcggcttt tcccctatgg  
42901 ggaaaagctg tcatggcgta cccgccgact ggctcggtag agacggaatg tacccgttg  
42961 cctgttatgc tgcgaccaa aggccgcttt cttgtcaaa gaacaatagg ctttgcggc  
43021 ctgcaaaaag acatcaacag cggatatgct tttgcggaac gacaaatagc ccataacggg  
43081 aagcgtggaa aggggacacg ctcccgcac gggctaaaag attatcctac atgaaaagca  
43141 aggggtcggg taataaggcg cacttgacgc ctgttacgca tttcctcgtc cacataggaa  
43201 taggtattgc ccgctcgtc tttcagcgtg cgggtacaaa gtttcgctat gtaaccctc  
43261 tagtgcttca agatcgcgca catggcgggtt gtgtcgcctt tgccgctgc ggaatgaca  
43321 gggaacggca acagattttc agacttcta acggtattca tcatctgctt ttcctcaa  
43381 atactgtttg attttcgcaa gcgcggattt cctgtgccgg aaaaccgtcg tgcgtacaac  
43441 attcagcagt tcgccaattt ccgctcgtc catatccaag aagtaggaca aaaggataat  
43501 gtcgcgtttc ttttcgggca aagcgttaag ggcttcggca agcagttcat tttgacgag  
43561 tacatcaaag ccggacactt gaaaacggaa ataatcgctt tcgtattcgt ccgttgtaa  
43621 aagctgcgcg agttcgtttt cgctcaaatc cgaaaaagta acttcgcgtg ctgcgcgtt  
43681 cgcaagagtg cggcgggtggc ttttcgctt gccgacaaa gttttcttg ctaatgcgtc  
43741 gtactgatgt tgtattcttt cttgtcggga agaagatagc tccatagagt tcacctcctt  
43801 cccgcgtgga gtagaggacg ggagttaagg gcttgcctc tctgccctt tcgctccgta  
43861 cccgttcggg agatggctct tgagtgcgct tttcagaaaa aagttgaaaa aagcaaatg  
43921 cgcccgtccg caagacgcgg acgggcgcaa aggaaatgta agcagtagct aatgtattg  
43981 acagttcaca tccatagccg gaatatcccg cttgcggagc atagctttt ttgaccgcaa  
44041 agcattagc gggttacagt aaataaaaaa ggacacggcg atacctccc gataccgccg  
44101 tatccttaa aaagggcgac ttaatacac taccgcaat ccattctata ataggaaca  
44161 gcggctttt cgcaatatta aataaaaaa cggataacac ataggtttt tgacctaatg  
44221 cgttatcggc tctgcgtcta tgcgtctggc actttaatc atttttttt gaattatta  
44281 tatgttttag ctaactgtcc acaagccgcg ttaatctctc tgccatgaga aactctcata  
44341 gtaactcaa gtcctgctg ctctaattga tgtttgaatg caactattc ccgtttctgt  
44401 ggtgctttaa ttcttgaatt gcttggggg ttgtattgta acacgttaat cataactttt  
44461 ttgccccgaa accattttg aagttgtctt acatctgagg gccggtcatt tatacccggt

44521 aaaagcaaat acgcaaagac aatthttgca ttatgccttt cagaatagga taaggcttgc  
44581 ttaacaacat cttcaatagc atatatgccc atgtgaggaa taatacgatt tcttgcat  
44641 tgtgttgctg cgtgtaaaga tattgtcaac tgaatthta gatgttctc gcgcaattht  
44701 ttaattgat cgaccggacc aactgttgat atggtaatgc cgtcggttgg aaagttgagc  
44761 ccatatctat ctgggagaat atggattgct thtatcaagt tgcataatt gaataaaggc  
44821 tctccatac ccataaaaac gatacggtht actthttcgac gcaacaatat aatctgttgt  
44881 acgatttctg acgatgttag attacgaaca aagccatttc gcccgactc acaaaaaata  
44941 caaccaacag gacaaccgac ttgtgtgctc acgcaaacag ttccaccatc tcgccgctg  
45001 ataaaaaccg thtcaatgta thtgttctc ttcagttcgt aacataactt ttcagatca  
45061 ctgctthttgc aaataththt taccaacatt gatagathth thttgcgtgg taattgctta  
45121 tataattctt catataaggc thttgcttca thctcgcaa taacttccga cattcttht  
45181 taagtaaatc cgtatggatc attccgtact tccgaggcg tatathtagg taaacgtthc  
45241 atthttat cctthctct aaataataaa agthttgtht tctgtathth tgattacaat  
45301 ctctaathth tctacatcaa tgatagcgt caathttgat ttagggcaga aaagaggaaa  
45361 atctthtaac acagtattat gaaatacttg aactctgctc thtccgttac aatcggaca  
45421 thttatcaa tathththta gcattatatt tcaactgctc thttacaca aaaaaatgca  
45481 ggtcaatcct caacatgagc atggactgc atthataatg cacagagcag tacaacaaaa  
45541 ctaaggcata gcttgacta tgtctatact atatctatac gtcgttagth thttgatag  
45601 catccgcaaa ataagcatga caaaaaagcc catgttgaaa atgggaaaat cctththttc  
45661 aatgcttatc taatacgcat gctatgcaac ataaacgcc cctcctthta cataaathth  
45721 atthttatcag aaatcagtc tactgtcaat acacaacagg aagththta cctaatgata  
45781 tgaattgtgt ggacatatcc aaaaagaaag gtgaactgta aatgtaaca gggatgaatga  
45841 aatggcaaa aagaccgta ccattgtacg actthtaaggc thtcggggca gctataaaag  
45901 ccgagagaaa tgaatacggc gagagccgca aaaaggtaaag cgacgagtha tataththcc  
45961 cgcgctacct tgcgaatc gagaacaagg gacaacagcc gagthttacag gthttctatg  
46021 acctgtaac ccggtatcat atthcggtag atcaaththt thtccgcaac agcaatgcgg  
46081 agaaatccac cgggcggcgg cagcttgacg cgtgctgga cggatgagc gataaaggca  
46141 tacggattgt aaccgcaaca gcaagggaga taacggaagt cgaaaaagca gaggathaac  
46201 ctcaaatat gagaaatcgg gagattgagc cgatggcgg ctgcaatctt thttgcgtc  
46261 caaatcaaa ggaacgcgca caaataccg cthttcggtg gggatgga gtagatagca  
46321 agcacagcaa acgagtacc gthttcgga aatgctgtt gggataatcc caaacctta  
46381 taccgaaagg cgggtcggaa atggaaaacc gaaagagaaa tatacagatg aagthttacg  
46441 ttacggaaga agaaaagcgg ctgatcgacg agaagatgaa gcagctthcc ataaagcagt  
46501 atggggcata cthccgtaaa atggcagatg acgggtatat thttgctgtt gaccgaagcg  
46561 acacaaaagc atatatccgg gaactgcaag cggtagcgg gaacatcaac caathtgca  
46621 aacgcgcaa tgcgacgggg acgthttaca ggcaggatat agaggacatt aaaaagcgg  
46681 tggacgagat atggcggtht caaagacgca ccctathaa tcaacctha aggctgcat  
46741 agactatc thaaatccc aaaagacaga cgggaagctg ctgctctc thttcggctg  
46801 cgggctgga accgccgata ttgathttgc atggacgcgg gaagctgcc gagatcgcgg  
46861 cacaththt gggcggcact tgatacaatc thttcggtg ggagaaacca caccggaaga  
46921 agcgcaaaa atcggcatgg aactgcccgg ggcggtatha ggcggcaagt atgathttg  
46981 thtgacaact cacgtgata aagaccatct gcataatcac thgaththca acgcggttag  
47041 cthcttgac tacaaaaagt accaththca caagcaaagc tathcttht tccggcgcac  
47101 cagcgacagg atagthaag agcatgggt atccgtcgtc gtaccgggac aggacaaggg

47161 aaaaagctat gcagaataca ccgccgaaaa gcaagggaca agctacaaag caaagctgaa  
47221 aacggcgata gatacttca ttcccaagt gaaagatttt gacgaactgc tgcgccgctt  
47281 gcaggaaatg gggatgaaa tcaaacaggg caaatacatt tcctttcgcg ctgccggaca  
47341 ggaacggttt acccgcaaca agacgctcgg cgcggcctat acggaagaag cgataaagga  
47401 gcgtatcaag ggcgtgatg ttgcaaaaac aaaaacgctg cgggaagata agaaaatccg  
47461 gcttgcgtc gatcttgaac acagtatcaa agccaacag tcggcgggct atgaacggtg  
47521 ggcaaaaatc cataatctga aacaggctgc taaaagcatg aacttcctaa ccgaaaaca  
47581 gattgagtat tatagcgaac ttgaaagcaa gatagccgat attatgaccg ctcattgacg  
47641 ggcggcaaa ggcgtaagg aagtggaaca gcgtatgtct gatttgcgc tgcttatcaa  
47701 gcacaccacc acataccgac agttaaacc gatttacgat gaataccgaa aatcgccgga  
47761 caaggaagag tatctgcggg ggcattgaa cgaaattatc ctgtttgaag ctgcggcaag  
47821 ggcattaaag gaaatgcaga taaagaagct gcccgatctc gccgcgctgc gcaaggagta  
47881 tagaagctta aacgacagga aaacaaatt gtatgaagat tatcggaag ccaagaagca  
47941 aatgcaggaa tacggcgttg tcaaaaagaa cgtcgtatgt attctttacc cgtcccaag  
48001 cagggcgcgg gagcaggagc gataaggcgc aaaacatggg gttggcaagt gaattgtaa  
48061 ggctgaaaac gcctgtgttt ctgcggcttc cagcgcata aaacgacata gacgataag  
48121 tatattcaa cccgcaaaa cggttttcta attgtccacg caaggacaaa aaaagaacag  
48181 gggcgcggtg ccggaatcg gcaaccgac ccctgttctc tatgggctat tcctcgcg  
48241 tcaagataaa ctcccttcg gaaaactgc tgcctcat ggcttcgac ttgttcaccg  
48301 ctgcggcggc aagctggcgc atactcctgt ccatgtaggg catggcggca aggatattt  
48361 caagcgttgt ttccggctg tcctcggcgt agatcgcaac aatgtttct tcctcaatg  
48421 taaagcgggt attcatgcta tcaaacctcc aatcctttt tatgtcttt ctgtttatct  
48481 ttccgctgct gcgccgctg tttctgtat tctccagct tctcaaaat ggacggttt  
48541 ttctcggct gttccgctt ctgcgcttt accgctttg caaggctggt aacggaatc  
48601 gttccccg ctttgcccg ctgctcaaaa tctgcaacgg tggcgcttg cggcgtattg  
48661 ttgataagcc cgtcaaaatt gttgtcgtc tgctctatgg tgcctcgcac gtgcttaag  
48721 ggattatccc gctgcggctg ctgcggcgt atggcataag cctgtgtgcc attcccata  
48781 atgagatact tcccgtctc cgacgatgg tgaaaaccaa atcccgcgc ttcgatctgt  
48841 tcacggctca tatcgtaat atgaaaattg ccctcggcg ttctaacggt ttcaccgctc  
48901 aaaaggctgt cggggctgc ttccggctg tgctttcaa gctgccctc ctgttaggaa  
48961 tatccttgcg ccgcgattg ttcaagggtc ttgccgtaa cgtccgata aatccgctg  
49021 tctcgtcaa ccagcattg caaagtgtc tgtacggtg cggacaaggc ttgctgctg  
49081 tcgggcggca gcttgcata tacgggggtc tgctgctct gcaaaaactc cggcacttg  
49141 tgaaccga tactgtctac atagtggcg gtgtcctct cgttctgat aagcacaaca  
49201 atgtcgaaa cggaaaggct atgccctta agtcggcgg ggtggtcgat attaaacct  
49261 tcccaaatgt cggcagcgt catatcttt gtaagcgtg cagtatagac gagttcataa  
49321 ttaccgggt caatgtaag tccagcgtc tcagacggt cataaggctc aaagcgaag  
49381 tccctgttt cgtccccg ctttaactga taaatgaaa aggtatgcc ctgctcctg  
49441 tcggctgct gctgctgct caactcggta aatgccct caatctcgg aatgagttcc  
49501 ttgcggtg tctgtattg ttcaaggac gctttaaact cggtcattc ctgcccgtg  
49561 ctcaaccag ccacatagc gaaagagtaa tcggaagtat caaggccgaa atgctggcaa  
49621 accgtataag cgacgcttc cgcttctacc tcgaggtat ggcggtcaac gcggtttgc  
49681 tgctccggcg gggcgttaa gtctacgtc gcagcttc catggcgat ttcgtgaatg  
49741 gcggtctta ccgctgtaa ttactcag ccctcttga ttgcaatag cttgctggtc



49801 aaactgaaat acccatttgc gccgtttgtg atctgctcaa atgcaatcgg gacgggggac  
49861 gctttttcaa gggcggcgaa aaaatcctcg tactgctcca catcggcaag cagcggttta  
49921 acggaaaggt cgggaaactc cttgccctcg gtctgcgaaa tatcaaagac ggttataacc  
49981 ttaaaggcgg ggacggtgat ttcctttct tcctttacca ctttccctc gcggtcaagc  
50041 atgggcttct tcgttcggg gtcgatttta tcaaccagct tttcacctt gtagggcgcg  
50101 ggggcaaaga ttttaatgcc tttctgcct tctttacat ggcgggcaaa ctcttttcc  
50161 cattgacgga agcccattac caaattgccg cctgcatag caattaggat agtgttattc  
50221 aaactataat catggaactt tgacatagcg gttagaaact cttgtagcg gtcgctgtca  
50281 aaaatcgct gtacgccctg ttcaaacgc gcggtgatct ctttacctt ttcggcgggc  
50341 ttttcggaag taaggataat ggggacgacg gggcggggct gctgcggctc tgcggcctgt  
50401 gcgtctgctt gctgcgttc ggctgcgtcc atataggctt tgcctgttc gccgcgtcc  
50461 ggctgcgggt aactcataat gcggtattct tccggcactt cgcgccctc aaactgccg  
50521 tcccactcgt cgccgcttc cacgatatag ccgtactcgg taaacgcgcc ttttctcgc  
50581 gcggcagcgt tcctgcaaaa agtagaaagg tcaatgccg ctttcattc ttcgggcatt  
50641 tgtaccatgc cggattgatt taagtaatag tcgccc aaat cgtggtagtt atgtacttcg  
50701 gggatatgga cgtaaaaatc cacgtttag gtgaagtcaa ttacctgtcc aatattgca  
50761 agccccgttt tctgctgcaa agctgcgttc agcttgccaa cctcggcggg gtcaagctgt  
50821 tcgagcccg cgcaagaaa atgagttcg tccacgtcgg cggcgcatc catttcataa  
50881 ggcaaggcaa tatgtttctc cgggtcgtcg gaatagccg gaatggaaaa atcctgcggg  
50941 ttgtcggcgg taatgccgac gttccgata gcttcgtgca actgctcctt tgtggcgggc  
51001 atatccaacc aatagccgcc ggggtcggcc gcgtcaaagc ggctgcggtt gcctatcata  
51061 atagaaaact gttcgtcat gtgttcacgc tccttttct gcccggtatt ttcggggata  
51121 gctgccgctt gttgctgctg cgggggttct tcgccctcta tgggttagtc cggcatgagc  
51181 ataccgttta cttgaaata gtcggcgtac tcctgcggga taggcgggga gatttccgta  
51241 aacaagcgg catabgcttt gatagccca ttcagatact tttccatagc tgccttctc  
51301 gtgaaaacct ttctatcttg tccggcaatc ttcgcttggg tctgcttgg gctgttggg  
51361 cgcacgctcc atgtaagcgt ccatgaatac gggatagatt tctgcgctc tttgtcgtg  
51421 cgggtattct cgtaaatgta gtaattcatc tgatataacc gattgctgca aatatggcgg  
51481 ttatgctcgg tggctgcca ctcgttagcg gtgtgctgga cgtgcggcgt tctacatat  
51541 tcaagtgtt tatccagcaa agcgttctt cccgcctgtt ctcccatgc ggcggcgcgt  
51601 tcttaaggt cgtcaaaaat gcctgttct gccgccgcg ttcgctgca catgaaagt  
51661 agctgcgcaa tcggcaagga agcataagg gcaatctccc tgcctttgc ttcaaaatat  
51721 atccggcgtt ctatccgcat gtttcggcg gcttctaatt tgcattggtc gtataggaa  
51781 tacggcatat tcttcatca cgtccttct cggcatata aggtttggg actatccaa  
51841 caagcaaat gcccgctc tctatgggaa gcgcgggcat tctcgcgaaa cgggtactcg  
51901 tttgctgctc ttgctatgta gttgtttta tccgtaaag cctgtttctc tcgcttggg  
51961 ctttctgct cggcgtatc tttgccgca aatcggggca gtatttcgcc cggttgctg  
52021 ccgccgcaaa cgtgctgcc catabcgcg aacgctcaa atcggttcc ccgctgcggg  
52081 tgatctgtt gcaaaagctc ctgctggcgg gtaataaccg ttcgcgaaa tagcggcata  
52141 gcagcgaata gctgatactc tgcacacaaa cgcaagttc cccgtcgtcc agcagcagac  
52201 aattccgca atcgtgttt gcacaagcg cgcgggtcat tttctttagc gcgcggtatt  
52261 gcttttcatc aagccttct atttcgggt ctgctcagc cggaagtta catactgccc  
52321 gcctgtgctg gcaagcagca caactccgtc aaaggtctt cccgtcttgg tcgagtacat  
52381 accttgatt tttaccttc cgtcttcaa aaggcggcg gcaatcgcct ttgtgaaagc

52441 ctttttgcgc tgctcaaaaa agcggtcatt cttccacatc acaaagctgc aagccctgtc  
52501 ggagcagtaa aagtttttct tgccctcgta aaccgccgcg ccgcaacggg ggcaagtgcc  
52561 gattgcttcc cgctgcgggg taaacagctt cgctttatcc tcggaaatcg cggaataggt  
52621 cttgacaagc cccgctgtca tttcctcaat cccgcgcatg aagtcggcgg ggctgtcgt  
52681 gccctttgca atcccggtaa ggcgcgtttc ccatttgcg gtaagctgcg gggacgtaag  
52741 gctgtcgggc agaatagcga caaggtata cccgtccttt gtggggatta gctttttgcc  
52801 cttgcgctcg gcaaagccc cgctaagag ttttcaatg ataccgccc gcgtcgcggt  
52861 ggtgcctaac ctttgcgct ccgctcctc cggcgtgtcc tcctttccc cacttccat  
52921 agccgaaagt aacgtatctt cggtaaagc ctttggggc tgctgtaac gttcggagat  
52981 ctccgctgcc ggattgtcaa aggtctgccc ctccgcaagc gggggtaaaa ccgcttccgg  
53041 ctctgcgtcc tcgtctgtt cccggagcgc ggcgcgggat agtcttcaa tctcgcga  
53101 acctcgcaa agcgtctcc tgcccttgc ggtaaaggta tagccgccgc aagtgaaaac  
53161 cgccgaacc gcttcatact catagggcgc ggcaacggcg caaagcagtt ttgcgcacac  
53221 aagggtcatt agcttttct cactttcggc aagggaagaa aagcccgtt tcaaaaact  
53281 cgctgcggc aaaatggcgt gatggtcggg tactttgctg ttgtcgaaca tctcgaag  
53341 gtcggcttgc agcttcacgc cctgataaaa ggggagagca gcgcaaaggc cggtgataag  
53401 ttctttgtg ctgccctca tctcgaagc gatataattg ctgtcggcgc ggggataggt  
53461 caaagccgt tttcataaa gggcttgcgc atagtcaagg gtctgttccg ccgtaaacc  
53521 atacaacgg tttgcttcc gctgaaggc ggtgaggtca aacagtttcg gcggggctgc  
53581 ggtcttttc tctttttaa gggaagtaca aacggcctgc gatttctgc aagccgctt  
53641 catctgccgc gccgccgctt cgtcgtcctg cctttcggaa agggcggcaa gcgcccaac  
53701 gtccagccg acgacatgat atttctctt cttaaagctg ctgattgcat agtcgcggt  
53761 taccagcata gcaagggtg gcgtttgac tctgccgaca ttcaatggtt tatgtagag  
53821 gatagagaaa aggccggctg cgtaatgcc aatgagcaa tcggcctttg ctctgaaaag  
53881 cgcgattga tagaggtgt catagccgc cccgtcttg agattgaaa agccctcgc  
53941 gattgactt gcttcatgc tgctaacca aaggcgggaa aagggtttt tgcaattcgc  
54001 ctgtcatag acaaagcga aatgagttc ccctcgcgc ccgctgtgc aagcattgat  
54061 aatctcggta acgtcgtgc ggtgcataag gtcttgaga atggaaaact gctgctcct  
54121 gccgtggca acaataaact gccactcctg cgggacaatg ggaagatcgt cgtacttca  
54181 ttacggaat tgtcattgt aggtcgcgc gtctgcaagg ctaataaat gccgataca  
54241 ccacgacaca aggtagccgc gcctcctaaa atatcgcgt cgctttcat tcgcgccat  
54301 aagggcggca atcgcgcc ccacgctcgg ttttctgca attacaagt tcatagatta  
54361 tcgtcctct gctcggctg ttcggttcg actactcgc ttcctcgtc gtcctcgtca  
54421 aatcaaggc cgtcaaggc gctcgtcct ttcgccgct ctttttggg cttcaaatc  
54481 taaagtagt agaacgcgc gccgccgct gcggcaaca gcagcacgac aagcagaata  
54541 ccatgccgc gccttttc ttttccggc ggctgctcg ttttccgg ctccggctc  
54601 gctccacac ccgctcact gctcatgtg acgctgcaaa ccgggcaagc ggtgttgac  
54661 cttccggcaa gcattatc ggtgcagta caaacgggg cttcggctg cccgtcctc  
54721 ataagggcg taaatccgc ttcctcact tggtaagga aatggacggt atttcccg  
54781 tctcggcgc ggtcaatgat gatgtaaaa tagttgccac ttttgtaac gacggtgata  
54841 aactgctgt ccgggacgc taccaccgtt atatcgtca caaggacat atcccgtc  
54901 ggggtaagg gctcggctc atagccccc gtcgttctt ccggctcgg ttcggcgcg  
54961 ggggttctt cggttacgg ggtaggcgtg tcgtcgtt catgccacc gccgcataa  
55021 gcgtaacag aaaagccga catgataacc agtgcggca gcaatacgg aaacttccg

55081 attatctttt tattcttcat tgtcgttgc ctctgttcg gcgggtaag tggcttccg  
55141 ctgaggcaag gtgatttcgc cgctggcgta agcggagagg aacgcggcaa gctgcgtccc  
55201 gtcaagggtg accgccttta ccatttgac gatctgcgcg ttttctcct cgactttctg  
55261 cgctcaagg tctttcagct tctttgtgct ttcaaggatt tttgccctcg ttttctcaat  
55321 atcccttcg atacggtcaa gtttcgtgtt cgccatagtc atttactcct ttccaaactg  
55381 ttctttccat gaatagctgc gcccattcc cttaacggtt ttaagatagg gcatagcgtt  
55441 ttcttcaaaa gtcgccccc ggtaaataag atcgggatag tgttcttga gatataaaat  
55501 ctctgtttc tcatgctcg gacaaaagaa acaggacgat ttaccggct gcggcaatcc  
55561 tgccgcttg atttcccga tacaatgctc cctgttcag cccattctt caatgagggg  
55621 gtagcggta tgatatttt tgcggcttc gttgtacttg cggaatggt cataccggtt  
55681 cacttctcc ggtcatagc cgatagcgc gttgacttc tcgccgct gccatactc  
55741 gcggcaaggc gcatagtggt tgcaaaactt ttctgcggt gcgatttgt gtttctgca  
55801 acaacgctta tgcccgtagg caatcgacgg gagcgtatga gagcgaagc actcgtttc  
55861 aagagatagg cggttgccg agcgtcaac atactgcaca acgtaatct gcggcatacc  
55921 gtgttcgca agcattgat tgattatctc gataaattga taggtatgcg ggtgtccgc  
55981 gccgatcgc gcaaaggta taaggtaac cgggatttg tgcttgata ggccaataag  
56041 taaggcggca ctattcgtc cgcccaaaa agatacaata ttattttt aactccttt  
56101 aattgaatt taaccgccc taggcgtaaa agtgggattg ccaatagctg gtgtccagct  
56161 ttgaactag gataggtgc ccacaatga gcatgacggg gcttccgtcc cgtcctcgc  
56221 ccacataaat ccccatagc gaaacgccc ggggtgcgta tgtaccgta aagaacacca  
56281 aatccccgg ctgcccgtta gaaacgggg ttgatggtt gtaaagcct tcgcccaca  
56341 gtctgccgt attgtatagg ccgtgttcg tcaacacata actcacaag ccgtgcaat  
56401 caaagaggt ttccgggtg ctgccccc acacataggg aaaaccgac tatttatctg  
56461 cttctccat gagccgcga aactttcat cggaaccag cagcgcggcg ggtacttcat  
56521 aatcggcggg cgggtttca tagtatttag acacatagcc ggattgcggg aaaaggctcg  
56581 gtctgttcc cagcgcgc atatacatag cgtacatgga tagctgttct tcgccatga  
56641 tgtaaaggc gatagggag aggtgaagt ttccaaatc cacatgaaga atgtaatag  
56701 tataggggac ttcaaccgta taggggtg cctcgtcgc cgtccttgt tcggtgcgt  
56761 agcgtactg tacttctcc tcgaccgta agatatactg tttctcaaag agcatttcaa  
56821 ggggtcttg cacttcatg agtgtaaca cgccctatg ccacgggaa aggatagaaa  
56881 ttagacata ggggtcatg tcgatctgt ccgctttac ccggtattc tcatagccg  
56941 ggtattcgt ttgatattg tccagcatat ctgtaactc ggcttccata gcggcatagc  
57001 cgcttccgc gccgttata tccgctcct cggagagata ggacgacgca atcaagccg  
57061 tgccgctgt gccgcaaaag agggagcaag aggacagccc gccgaaaagc agcagcacga  
57121 taaaggcaat cccgccaca atcaagcagc cttccaatg ccggacaaca aagaacgtc  
57181 cccgttggg ttctgcgc gtttcttcg ccgcttgc ggtggctca gcggttttt  
57241 tcgcttggc gccgcttc agcgttttg catactgct ttaatgctg tcttctgcc  
57301 aaaaacggga aatggggtg gagtgcaaa gcgcggggt atcgtgcaac gcctttgat  
57361 agagaaaatc tgcgttggc ttaccgctt gttttccgc tgccgctg gccggtagg  
57421 gttcagctt atggcggcgt atgccccct taactgccg cggccatg ccgccgctt  
57481 tctctcggc aagttctacc cgggtcccgc tttccacacc gacgtttct tctctacct  
57541 cgtagattt cccatgtac gtactgtta actcctgtg cggacgggat aagggttat  
57601 gccgcaact gccgttggg ggcttatccg tctttcaaa ggaaaggcgc gtcttgcct  
57661 tgccttcgc ttcgcaaaa acgctcctt tctgattt ggtctgctt gggatagccg

57721 cccgcgctgc gtctaaacag tctgccgct tatccgattt cttgatcgct ttttgaagtt  
57781 ccggcgttgc ccgttccgct tcggaaaact gcaagcggga agaattgggtt ttaggctgcg  
57841 tcgctcaag ggctttttc tccgcgctt ttgctgctg tcgctcaatc tctgcgccga  
57901 tatgctgcac aacctttcc gctgccacc ctgcgggggc tgaatagttt tcttctgcg  
57961 gcctttcgct gatactggac gtttcgccg tcgtgaggtt ttccgcaacc gcaccgtcg  
58021 gggtcatttt ttgcttacc ttgctggggg ctttcagttc cttgctcaat cttcatcacc  
58081 tccaatccgc tgttttcaa gttcgcaata gtcgggggtt aactcaatgc cgatatagcg  
58141 gcggttaagc cgttttgcta ccatgccctg cgtgccgctg ccgaaaaagg ggtcaaggac  
58201 aatcccgcg atgggacagc ccgcaaaaat gcacgtttcc gcaagtttcg gcgggaacgc  
58261 tgcgaaatgc ccgcatgat agccgacatt gttaatctgc caaacgttcg ggcggtgcg  
58321 gacgggagaa atcaactcgt cggcgtatgc gcccttttcg cgggggcggt tgattttctg  
58381 cggttgggtt tgccccgaa cagtaacgtt atacttattt ctttgctaa ctccgctttt  
58441 cagccgcccc gccgttggtg gggctatcgg ctcggctact gttgccaat cgtaataata  
58501 cttctttgac ttgtaagca gaaacacata tcatagcag cgggtcggcc tgtcccgcg  
58561 gctttccggc atggggtttg tttgtgcca aatgatagaa ctgcgcaaat accaacctgc  
58621 gccccgaag gcgagggcta caagccacgg aataccaatt aatctttgg gttgcagcc  
58681 gggggcgcg tggttaaagc ccacttgctg cccgttctg ctttggggg atttggggtc  
58741 ttggtgctg gctttgctg ctgtgccga ataagtgtcc gcgatattca gccacaagt  
58801 accctccgc gtaagcacc ctttacctc atggaatacc gccgtaatac gggaaacata  
58861 ttctccggc gttgctccc gtccgatctg cccgtctgcg ccgtagtccc gcaaggcata  
58921 gtagggtagg gacgttacg aacaatcaac tgcatttcc ggcaagggtt gaagcacctg  
58981 caagctgctg ccgcaataga tttgtccat ttctatctc atgccgacac ctccggggt  
59041 ttggtgctca ttacagata gagtccgta tcttgcggga aacggtaat aaagggcaaa  
59101 atcacgttc catagaagat aagcccctg cccgcgtcgg aatgggttac ataggtcatt  
59161 tgctgctcg aatgttaag ctgctttgca aggatttccc tgtcgccctg ggcttggtg  
59221 agcatataca caaatcgct gtttcaaaa atgttctcca cctcgcggga cgatacaaa  
59281 tctttcacg tttgggtgat acctgtcga ataccgccc attttctaaa acgcttcaa  
59341 atctcaacg tgtacgctg ggtctgttcc tcttgagca gcaaatgaaa ctgctcgata  
59401 tagtaccgcg tcgccttgc ttcgctcgg tttatgtaa ctctgttcca aactgatct  
59461 tggacaatga gcataccgag tttctgtagc tgggtgccga gttctttaa atcaaagcag  
59521 acaaggcgg tgtgaatgc aacgtttgt ttggtggtta acacgttcaa actgccatt  
59581 acatagagt ccaatgccg cgcgatacgc tgcgcttct tttccggctg cttcttgatt  
59641 tcattgtaga ggtcgccaa aatcggcata ttctccggct tcgggtctg aaggtagctg  
59701 cggtaacgc tgataacgg gcggtcaatc aaagtcttt caaccgctc cagcccgtt  
59761 ttgccgcca taatcaact gcaaaaggaa aggataaaat cgctcttaa ggctatggg  
59821 gtgtgccct cgctgtaatt gaggtttata tccatcgggt taatgtactg cgtgctgtc  
59881 tgcgaaacct tgataacct ccctttcagc cgttcacaa ggggtaata tccgcttcc  
59941 gggctgcaaa tgataatc gtctgcgta atgagaaaag cgttggtgat ctgcgcttt  
60001 gccgaaaac tcttgccgct gccgggtg cagagatca agccgttagg gttcttcagc  
60061 ttttctctg cgcaaaaat catgttattc gataatgct taaagccgta atacaacgct  
60121 tcgccgctt ggaacagctc ttgtaccgta aaggggacga aatggcggg gctggaagtc  
60181 gtcaagcccc gctggattg gattaggtt tcgccaatg ggatagagga cataagcccc  
60241 ttttctgccc gtagtcaag gcgggtgagc atacagttgt atttctgtc gatactgcg  
60301 gcctgaaata cgtcgttgc caatttctg tttgtgctg ccacattcaa aactaacagc

60361 gtaagcaaaa acattcgctc gttccggctc tgcaaatccc gcaaaagggt tttcgcttcg  
60421 ccgccgtagg tggcaaggct ggacggaatt atatccatat cgtagccgct gcggattgcc  
60481 ttttctgtt cctcgatttt catacggctc aggtcgggtga tttccgctt gatcgtcttg  
60541 atcgcttcgt tgtggctgat actctgaatg tgcagattga cgacaatccc gtttccgct  
60601 tccatgaagt cggcaagcat acggtctgaa agttccggcg cggcaatctg caaaaaggaa  
60661 accgcgcaa acttcccgcc catttgaaac attcggcgt cgccaaaacg gaaagaggac  
60721 ggggcaataa agtctttgac ggaaaggccg cttacgggta gccattcca cgcaaagttg  
60781 aagcgttccc cgtccgggtg gaaaagccca tgcagcactt caagccgctg cttcccgtcc  
60841 aataccgcg ccgccgcc gatcacctta aatgggtga ggggtccgt ttcgatacgg  
60901 gcaagccgcg ccgcgccga ttaatatct tttgctcaa tggtaaagg gagaaactt  
60961 gtctgataa gccggtgtt gccgcgttca agctgtgtt gcagcattc ggtgtattcg  
61021 gctctgatac tgtcaaagtc gtacattctg ggggcaatcg tgatactgct cttgaaatcc  
61081 tcctgttcg catggcggct gattaaggaa agctgcacac tgatagaagc gtcaaaagag  
61141 ttatacatat cgcaaagggc ttcaaaaatg gcggtctgt cgtccggctg cgcaagctga  
61201 tagttaatat cttcaaacct aatgcacttg gaataccgcc cgtttgcaag gcggcaaact  
61261 ccgtccttat acattcgttc aaacggatg ctgtcctgcg ccgatgggg cttcccgtcg  
61321 cccttgact gccggataag cgcctcgtc tgtttcttt cctgccgctg aagtttacgc  
61381 ttttgtttt gggctttcc ctttcttt gacaatgcc cgtacctct tatctaatc  
61441 ctctgccgc gcaagggcgg tataaaaatt gttggtctga taaggctgct cttggggcg  
61501 aagaaacttc acttccaaa attgccgat aatcacttc agcggttgc cgttctctc  
61561 gtacatagcg agtaggaaca tgggcagcat ggcaagcacc atgcacaaag ccgccgtgt  
61621 cgttcccgc ctgtccttg tcaaaaagaa tagcggtagc ccgatagcca ccgccgcc  
61681 gaaacagagt aattgtctt tggtaagggt gaacattacc ttgctctga ttttggttaa  
61741 atccttggg acggttcat acgccattc aaacctctt tccggcaaac cgtatgtcgc  
61801 tttgatttc atttcccat acgtccaac caggggatg ctgccttga aacagttcaa  
61861 tacgcgtag gtcgccata agggcaagta ttttcccgc gttatatcc ggcttttgc  
61921 tgtctgctc aacaggggaa ataataaatt gatgtacctt gttgattgt cgctcgggt  
61981 gtccttggg agcaagcaag cagatttccg catttctcg cgtccaaaag cccaagccat  
62041 aaaaccaagt gggcgattc cgatttggct ttaaccatac aaaggcaacg gatttatagg  
62101 taaatccca agccttgatt aactgcaacg cttctttaa ctgcgggaac gtcgccata  
62161 ggaataaaat acagtccta tccgcaattt cttgacggg taaagcgaag agttcctcaa  
62221 tactcatagt gggatagtc tttccgctg cgcctgtac cttgcttct gcgtatctc  
62281 aagggggatc ggcgtaaatg atttgtatt tctcatctg caccctta atgcgcgctg  
62341 aataggatt ttgcaaggct tccgtttg aaaagcgtaa aacacaagag gacggtatag  
62401 cccatgcaag accagatcgc gccgatag tcatcggtg ctgcgattgt ctgtatcaa  
62461 accgataaa taccgacgca cacaagaatt agaaaagcct gaaaaccgag ggcaagcaag  
62521 gattttaagt agttctgct catgccccc cattcacgat ttaccattgt cgcaacgggg  
62581 atagggcgga tactcgttac aaggatatt tcaatcatgc gccgtacac caccagcatg  
62641 atacagatag acaacgctt catggtaacg cccacaaaga gtgattgaaa ccatagcccc  
62701 aaaagccgc cgacgtcat agcgtccagc tttgcttca tatcggatg aacggttga  
62761 atatctatg ttgtgcgga tatgataacg cccgcgctg cgttgcgac gctctgtga  
62821 atgtcaata cgccatgac gatgttcaa gtattgtta ccagcagcac cgcaacaag  
62881 gtttgaaaa tccactgaa gaaaatcaa gtgtcgagat cgtgcagatt gttttctca  
62941 attacaagct ggattagttc gtagcatatg acaaaggtaa tgataacgcc cgcaatcggc

63001 acaatgacgt tttccgatag gctgctatc atattgaata tgcccgcgtt ccacccggcg  
63061 ggggttgtgc cgacttgctg tgcgatttct ccaacctctg tatttacgct gtcgaacagc  
63121 ccggagagat tagagagat tccgtctgtc aaaatgccgc gaaaccaatc ttcaatcatc  
63181 tgccatatca aaagctaatc cctccttcc cgcgccctcc cgcgtgaagc gggagagcgc  
63241 ggcgggtagt gttagttgt ggcattatcc aaacaggccg gagagcagcg ggacaagggt  
63301 aaggccgata agggcaacgc cgccgccgc catcaactgt tcatgcctt gcgactttgc  
63361 tgatgtgta taaagaagta gtagaagtgt aaaaaattt gccgttcta tccggcgtt  
63421 gcgattgcg ccgataggt cgggcggta ttcgggcagg tctacctgc caacgaaaga  
63481 gtaataaata tcaatgtcct gtctgctgt gccgttctg tcatagctgc actcatgac  
63541 aacgatttc tccacaaact cacgcaaaag ggtaggggta agtttctca agctggtgta  
63601 cttgcggaca acattcataa acttttctgc gttaccgtg gttctctgc ctttgaaag  
63661 ctctgcccg atagcggcg ctctcttctt cagttcttgc tgctcggctt catagtctgc  
63721 cgacagctcc gtgaaacgct cgtctgaaat gcgcccggtc acgtgtcct catacagccg  
63781 cttgaagata gggataact cgctgatac cttctcggcg gttccagct ctttttct  
63841 tgcggcgttc ctgccttgc cccgtctc gttctgctc atcagcagct tcataaacg  
63901 ggcttctgc ttcgtgcat agctggtgac tttccgaga ttgtcggta ctcggcggt  
63961 caacaggtcg gtgcggataa agtgcgcgt acagtcacgg gtacgcttct ttagctccc  
64021 gcagataa caatcctgct tgcgggtggc gttctgtaa cgctgctgt aaaggacgt  
64081 gccgcagtc gcacaaaaga gtatgccga gaataagccc acttcatcat agcggttcgg  
64141 gcgttgcgc tgcttgcga actcctgac acgtcccac atctgggtgt caatgatag  
64201 ctatgggtg ttctgaaaa tgcctgtt ctcaatgggg ttctctacgc tgtgcttgg  
64261 ctttaggac ggcttctcc tctgaagt taccagacag cccgtgtact ccctgtttc  
64321 aaggatatgt accacggtat tggctgccc cttgactca tagccggggg gtagcggcg  
64381 ggtgcttccc gtccgacgt attccagcgt tccggcgtg gggatctct gctctgtgag  
64441 catacgggct atcttggctg gccgttccc ggcaaggcac aagctgtaa tctgccgac  
64501 aacagggcg gttccccgt caatgataa atttcgtcc tctccataa agtagccgta  
64561 tacgggttg ctgctgacgg gttccccgt cataccctta gaccgttta ctgcttgat  
64621 tttctgctc gtatcttca ccagccattc gtaaaaatg ttccgagag gggcaaatc  
64681 attgctccc tgtgctgt cactccgtc attgatagc ataaagcga cgccttctg  
64741 tgggaaaatc atttccgtat acattccac ttgcagatag tttcccta accgtgacat  
64801 atcctgacg ataacggtgc cgactttcc ggcttcaatg tccgcaagca tggctgaaa  
64861 accgggtctt tgaagtct cccagaata accgtcatct gtgtaccatt gcagattgga  
64921 aaagccgttc tgcttgcgt aggttcaag aatacgttc tggttgaaa tagaattgct  
64981 ctaccttgc agctgtcct cgtgggataa tctcggataa agggcggtta taaggttcg  
65041 ggtggtctgt ctaacatag tctcctcat tccgacagc cagccccact attcgtatg  
65101 actatcaca cacagccgg ggctggctgt acagtcttt ctgcttctt acgtcccgc  
65161 aaattgccga ttttgtgta gcagctccg cttccagcac ttcagcatt ttatcggcg  
65221 cgggtggcgt ggtgtctgc ttgaaatagc cggaaacgac aaggacagaa ttacctatgc  
65281 ggatttccgt cacgcaatc gggcggcggg tgctcggctc attcttggg gtgttggtca  
65341 taggcggctc tcttctgt tcatcagct tttcagttgt ccttttct cctgcgccg  
65401 ggctttcgg aagtgtctc cggtaaagc gacaggagaa cacatttca tcagacggtc  
65461 ataatgcgg gcgtggcgg tgcctccgg gtgtgcaag tctccagcg tgagattagt  
65521 cgtgacgatc agcggcctg cgctcggta acggctgca atcacgttgt agacctgctc  
65581 taagccgtat tccgttccc gttcattcc aaaatcgtca aggataagca gcgggaagct

65641 gcaaagtcgg gagatatatt cattcctgcc ctcaaagctg gcggaaggt cacccaatat  
65701 caatgcaaag tttgtcatgc acacggggat ttcacgctcc ataagggcat ttgcgataca  
65761 gcccgcaaaa tagctcttgc ctgtgccaac gccgccccat agcagatagc caatggtgcg  
65821 ctctttcatg gtttcccagt tctccacata gaaatgggcg tgttccattt gcgggcactt  
65881 gccgttgcg tttcaaacg tccagccctg catagccggg tctgtaaagc cccgccgtt  
65941 caaccgctcg acagtttcaa ggtgactgcg ctgtttctct gcggttccc gttcctcacg  
66001 ctctgcccgc tggcagtcac attctgccgg gtggcgggtca cgccccagcc atgcggcggg  
66061 ttctttgggg aatagccct ctttgggctt gtggcacttc ccgagatata aaagcccgtc  
66121 ctgcccgtg tagtctccg gctccggcgt ggtgtcggc atattcaaaa tcatttcac  
66181 aaatccattc gtcataagct ctgccctcc ttacaggtat aatcgggtat gcccttttc  
66241 ggggctttct tggctgctc ctctgcgcc cacttgaaaa tcgtggctgc atggctctt  
66301 tatttctcc cgctggaagc gatatggcag gatagcggg caatgtaata ctcccactg  
66361 ccggaagct ctgtttcag cccgtcaagc tccgtatcgg aaagaatgac atttgggtat  
66421 ctgcatagg cggcgggggc ggggtgtccc gtttctaact ctctctttt ttctatttct  
66481 atatctatct ctttctctat ctctatctct ggtggacaaa tgtccgctcg atatggtgga  
66541 catttgcg cccctgtctg cggcagggct tttgttctt gcaaagccag ccgcgccctg  
66601 cgcttgctc cccctcggg agaggactgg ccgataaaaa gctcaatgtt gctcatgtag  
66661 agtgcgccg tggcaaagg ctccacaagc cccagcttca taaagatttt caaagctctc  
66721 tctacggtac ctacctgctg gcgggtaatg gtcgcaatca tctgggaggg gtaggggata  
66781 ttctcgtcaa gctgcaattt cccgccgttt ttcagcgatt tcaagtacag ctcaagaga  
66841 atgttggat agataacgc gtctgcata cttccagca gaacgattgc atcatcgtca  
66901 aaatagctct cttcagctt gaggtagtaa tatttgcggg tatctgcat aggctgcgtc  
66961 ctctttttc cagcgttgg aataatagc agggcatagt atgataaccg cccggaagct  
67021 ctgtttgcag tcacgggtgc agccccggca taggtcgttg taagtatac ggttgcggg  
67081 gttgaggaag aaagaccatt ccagccgccg ctcttgctc attctcggca atgtaagct  
67141 ctttctgcc gttcctatcg gtgtagcggg atagggggca ttttctgtat gttctcgga  
67201 tcattttcgg gtttttctg cctgtaagc cccgttggga agtcggggag tattgcgga  
67261 aggttcata tcatactgt atttttagg ggtttcgga tcatttcggg gcggtctta  
67321 acgctctgt tcagctttt tctgctggct cgggtgcgcc cttaaatct ggtcgtatatt  
67381 gcgtctgact gtctgaagct cctgcgccg ctggcgtttc tccggtagt cgttatatcc  
67441 ggcgttctc tggacggtaa gctgctcaat ctcccttgc agggcttgc tggctggcag  
67501 cttggttatt ccatgctcc ggaataacg ggcggctgtg tccgctatga taaatcgt  
67561 tctgtgctgt tccggtagg ctctccggc tttctccgat tctgcgctt tcagaccgtc  
67621 acgggcgggc ttcgtgccga tatagccca aaggttgcg tgcaattct ttttctccg  
67681 gatagcggc tccagccct tcagtccggc aaggctctc tcgtggcgg tgttggctgc  
67741 ggaaatggca gctccagct cgtccggga agaaaagcca tactgctggt agagcatgag  
67801 ggtagccgac atctgttga ggttgtgcat ggtcggccac ttctcatagc cccgtcctt  
67861 cccctcggc cgcttggcgt ctatgtctac catgcgctgt acagcgtcat tttcggggc  
67921 gttttcgtc tttttttc tccgtaagc gtctttgata ctgccggggg attcgtctat  
67981 ggctgcggg tttcggcgt ctctggcggc gttctgctcc aaaacggaga ggacagcagc  
68041 ccggtcaaaa tcgtcccca gttccgggc ggttaattggc ttcgtcctgt ccggcgtgag  
68101 gtaacttagc cgccccggc tctcctgac ggtcacacca tgccggagaa gcagggcggc  
68161 aaactcatca aagccggaag cagcggcaag ggcttcccgg atagtccggc gcagcttgc  
68221 cttatccgtt tcaaactgg tctgccgggg cgcataccg tccgagcaa tagggcgtt

68281 ggctctgtca agggcagcct gtcctttctt ctgcgccccaa tactcacgct cggtaatgcg  
68341 ttctttgctg ccgttcaaaa ggtctatctg gtaaagcccc tcgctgtggc acatctccat  
68401 gacttcggct tcagatagt tcatagctgc gtccgtacag cgggtcttgc agcctgcttt  
68461 cctgtccgct ggctgtcca tgtggggcag catgggaacc tccgcaatcc gcagactgtt  
68521 aatgacgata tgcacatgga tattttcggg gtggctgtgt ccgtccgggt ggggtcgagac  
68581 aagggcctgg tgtccgggga aatgctcggc gcagaacttc tcgccagct cctgcgcccc  
68641 atcaacggtc aagccgttgt ccgggccgtc ccgtgggtca aagctgatga ttagtggtg  
68701 gctctttacg tcctccggtt tctggttctt gccgtagcgg agattggagc gcatacaggc  
68761 aacggcaaaa tcctccccgc cacaattcag agaggatatg cggtagtcta ccctcggtat  
68821 gagccgccg tctgctcaa ggggtgggctt catggtaaac tcgtcatgct cgaatgtgag  
68881 gtattttca gcgtcccgt agttggcatt ttagagctg atatgttga gtatcggca  
68941 cggcttacc tactttctgc aagactcaa acttcaaggc ggcaaggctc gggcgggctc  
69001 cccgacttc cttttcagc ccccgttagg ggcttccgta ttcgttcagg ctccgggcaa  
69061 tctggttaa gtgcccgcg attttccgt actctgccgt gagcttgag agggcgggca  
69121 gcagcccgtc attgaccggg gaaacgggta caatggggcg tatggtcgt tccgtatgg  
69181 cttgccgat aaactcggac tggctgattt cataagccgc cagccgccg gtgaagtcgg  
69241 cgtattctc atcggctatg cgggtctta ccacatgacg gcggtggggc gtattgtatt  
69301 tctttcgtat ggtctgtgac ctctttctc gcccagcagg gcgcatagca gggtttggg  
69361 aaggcactcc ccaacaagat tcccgcagg gcaaaaataa gcggagagcg aattttggca  
69421 cctcggtaga atctgtctt gaaaaactcc ggcttccc ggctcccgtc ctttcgcta  
69481 acaaacgtt tcaaaaggc ttgtctacc gctattccg ctatcttga aaatttctc  
69541 ttactacct acaacaccac gaaagcaaa atggacggag attttagaa ttcccctct  
69601 attccctaca acaccagca agccggaata ggccgacaat ggagatatt ttttcttga  
69661 taccctctac ggataagtaa gggatttgc caactcggc ggctattttc cttttgtt  
69721 tttcactctg gggatttca aaaatgcaa acaggaacga aaaaaagcag caaatctgtt  
69781 gaatagattt actgcttct ggttccggc gaagcggcgg ttattcagtt gtaggcggt  
69841 gggctatct ccaaagcga acttgaat agctgtgaga agcgtctggg tgatgtagt  
69901 ctctgtatct tggctatcc gtccattc acgggcggca cattgtatgc ggccggcgt  
69961 atactgcaat acagtcca ccgcttccg ctcccgtc gcggcttga cgattgttc  
70021 ataggggaga agcctattt ttctcatatg ccattccctc cattccgct tggagctgc  
70081 gtagggctt tcgatatgg tagcccgtg tctgctggc gcgccgtac tgtctgcaa  
70141 tttcgtctg tgaatacgc ttgaaaaagg acaggtaat cattccccgc tccgttctg  
70201 ccagccgtga cagggttcc gcaagtaac cgctgtgaa aatgaccgta tcgcccaaa  
70261 gggtaagtat gtattcctc tccggctccg gggcttggaa atattcatct gtcgtgcta  
70321 aagggtagtg ctttctct gtgaggtatt caaggatat ttcttttg tgcttctgc  
70381 tccgtctct cgctcgttg atcgttgc ttcggatatt tagttgtca gctgacaaa  
70441 taaagggtta agaatataa ttagattcag tattatacaa ggagttata aatatcggc  
70501 aaggtattt taataaact gtcaattga tagtgggaac aaaaagtagc agtcccgtt  
70561 cactttaat atggggctta gtttttga cccagttta gaatacttt atcatgta  
70621 ttatatgcc cgaacata taagtgttt gggctattg gagttatta cccagtata  
70681 ggagtttta tctctgggta ttttatgcc ctttttggg tttgatagg aggaaatca  
70741 catgaaata attaacttag gcattctggc tcactgtgac gcaggaaaga caacattaac  
70801 ggaaagtta ttgtacca gtggtgcaat tgcagaacta gggagcgtag atgaaggac  
70861 aacaaggaca gatacaatga atttgagcg tcaagggga atcactatcc agacagcagt



70921 gacatctttt cagtgggagg atgtaaaagt caacattata gatacggcag gccatatgga  
70981 tttttggcg gaagtatacc gttctttatc cgtattagac ggagcagtat tattagtctc  
71041 tgcaaaggat ggcatacagg cacagacccg tatactgttt catgcactac agataatgaa  
71101 gattccgaca attttttca tcaataaaat tgaccaagag gggattgatt tgccaatggt  
71161 atatcgggaa atgaaagcaa agctttcttc ggaaattata gtgaagcaaa aggttgggca  
71221 gcatcccat ataaatgtaa cggacaatga cgatatggaa cagtgggatg cggtaattat  
71281 gggaaacgat gaactattag agaaatata gtcagggaaa ccgtttaaaa tgcagaact  
71341 ggaacaggaa gaaaacagga gattccaaaa cggaacgta tttcccgtt atcacggaag  
71401 cgctaaaaac aatctgggga ttggcgagct tatagaagta attgccagta aattttattc  
71461 atcaacgcct gaaggtcaat ctgaactatg cggcgaggtt ttaagattg aatattcaga  
71521 gaaaaggcgg cgttttgtt atgtgcgtat atagcggga acattgcatt tgagggatgt  
71581 tattagaata tctgaaaaag agaaaataaa aatcacagag atgtgtgttc cgacaaacgg  
71641 tgaattatat tcatccgata cagcctgctc tggatgatt gtaattttac caaatgatgt  
71701 tttcagcta aacagtattt tggggaacga aatactgtt cgcagagaa aattttattg  
71761 aaatcctctc cctatgctcc aaacaacgat tgcagtaaag aaatctgaac agcgggaaat  
71821 attgcttggg gcacttacag aaatttcaga tggcgacct cttttaaata attatgtgga  
71881 tactacaacg catgagatta tactttctt tttggggaat gtgcagatgg aagtcatgtg  
71941 tgccatcctt gaggaaaaat atcatgtgga ggacagaaata aaagagccta ctgttatata  
72001 tatggaaaaga ccgcttagaa aagcagaata taccatccac atagaagtc ccgcaaatcc  
72061 tttctgggct tctgtcgggt tgtccataga gccgctcct attggaagcg gtagtcagta  
72121 tgaagcaga gtttacttg gatatttaa tcaatcgtt caaaatgcgg ttatggaggg  
72181 gttctttat ggctgcgagc aggggctgta tggatggaaa gtgacagact gtaaaatctg  
72241 tttgaaat ggattgtatt atagtctgt aagtacccc gcagactttc ggctgcttc  
72301 ccctatcgta ttggagcagg ctttaaaaa agcagggaca gaactattag agccatatct  
72361 ccactttgaa atttatgcac gcaggaata tctctcacgg gcgtatcatg atgctcaag  
72421 gtattgtgca gatattgtaa gtactcagat aaagaatgac gaggtcattc tgaaggaga  
72481 aatccctgct agatgtattc agaatacag gaacgattta acttattca caaatgggca  
72541 gggagtctgc ttgacagagt taaaaggata ccagccagct attgtaaat ttatttgcca  
72601 accccgccg ccgaatagcc gtatagataa gttcggcat atgttcaca agttagctta  
72661 acagcttgc aaagtcatat aaaatgagat ttgaaaggat tagagactaa ttatgatgaa  
72721 atgtaacttc atgtttgcta aaaattcaaa ggcatattct gtctacctgc tgttccgatt  
72781 tgtctgttcc ctggcggtt ctatgtccac agtgcttcc atcgtgtacc acctggaggt  
72841 ggtgcagctg gatgttttc agcttgcct ggtagggagc gttcaggaga cctctgctt  
72901 tctgttcgag ataccaccg gtgtggggc ggattgtat agccgtcggc gctcgggtct  
72961 gattggaatg ttcctctac gcctgggctt tctgatggag ggtgcgctac cgtggttcgc  
73021 gccggtctg ctggcccagg ttgtctggg ttgcggtgat acctcatca ccggcgctc  
73081 ggaggcgtgg attgcctcgg aggaagagga caaacccata gacaagggtg tctgcgggg  
73141 cagtcaaatg gggcaaatcg gcggcgttct gggcgtggtg ctgggcacac tgcagggaaa  
73201 cataaacctg caaatgcctc tcatcttggg gggcagttt tgcttgtgtg tgggctggt  
73261 gttgggtcgc atcatgccag aaaccaactt ctcccgtct attgaggaac ggcagggctt  
73321 gcttaaagac tttgtctgcc tgttcaagct caacctgggc tttgtgaaag gcgcacctgt  
73381 gttgctggcg ctcttagcaa tcacactatg cgggggactt gccagtgaag gctttgaccg  
73441 gctctcacc gctcatttc tggatgacac ggtaataccc gttatcgggc cgctgaacag  
73501 cgtcacttgg ttgggtgta tcagtctt atcggcagcggc ttaggattc tggcttctca

73561 gttgctcatc gcccgcatgg agaaaaaagg gactgtcagc cgaaccagtg tggatcatgtc  
73621 caccagcgcc gggatatatcc tgtgctggt tctcttcgcg gtggggcgga gcttttggt  
73681 catgttggtg gtgttcctgc tggcggggct tatgcgacc atcaaggagc ctgtgctggc  
73741 cgcctggatg aacgacatg tggatgagaa aatgcgccc acagtcttt ccaccagcgg  
73801 acagctggac tcttcgggc agatcatcgg cgggcctatt gtggggctgg tagcccagca  
73861 ggtgtccata ccctgggggc tggctgtac cgctttctg ctgtgcccg cgctgttctt  
73921 agtgccggtg gcgggaaaga agcgggattg atatggcata gtaagtta ctgacgagcg  
73981 ggagattact tccgctcgc ttcattagt agcgcaaat ttgaggactc tttatttct  
74041 tattcggtat agcggaggcg gctgtcaatt cgacataatt ttctgtgat actttaccgt  
74101 acatgagcat tcgcccggg gttatcgtt cgtaccct ccatgaggtt aatgccccc  
74161 caaatgcaa gtctgcgcc aagcgcgatt accaaagtct gcaatacgtc aactgcgctg  
74221 ttgaaaaaat ccatataaac ctgcctttct gccgtaaaa cggctcaaaa aatgttggtg  
74281 gaaataaaaa tgccccggt tttattcggc ggctgcgtcc tcgtcggaca aatctattc  
74341 gtatatgtca aagggttcgt cgggctttac gattgccgga cgggtggaca tataccgtc  
74401 aacgtcaaaa gcgttttct tgtcgaagtc ggaaaggat ttgtagtctg ggtgctgctg  
74461 tatatcgtac ttatcgtga aaaagggcg cacgccgcg aactgcaaaa tacattttcc  
74521 tccgtccata actgcgatt cgctctgtg catcaactcc tttccaatt tctgataatt  
74581 gaggccatga gaaactgcg tgcccgatt ttcggaagt ttgaaactgt cgattgttc  
74641 acgtccaag ttccgaaa tatccttgc attttccg cgccctcca aaaacaagt  
74701 gctgtcggca ttgtcaagta tgatttctg cgctcctt taaatggct ttagctggct  
74761 ctgcgattg agaatgatag aagccgat ttcccggctg cggattgtg caatcaatt  
74821 ttcaactgc gggattgtc caatgttgc aaactcgtc aacaggcagc gaacatgaac  
74881 cggcagctg ccgccgtatt cgtcgtcggc cttgtcgac aagagattaa ataactgcga  
74941 ttgagcata gcgatacaa aattaaact gctgtccgta tcgctcataa tcaaaaaca  
75001 agctgtttt ctgtgccta acgtgtcaag ttctaattc tcgtaggaca taagatcgcg  
75061 caattcctt atatcaaaag gagcagcct cgcaccgcaa gaaatgagga ttgatttgc  
75121 ggttttccc gaaacaagt gtcaaggact tttaatca attcacaaa aagccacaaa  
75181 aaagtccag aagcacttc atgctcctga cactcagggt ggtgaggta cttgcgtctg  
75241 ctaacagtt catgcaaag atacgcatat tctggcaact ggtcagata gggtttcaa  
75301 cgccgttga tttcgccaa ttccagcggg tcgcttct ctatcgcgtg gtcgttgcct  
75361 gtcatataca gaacatcat cgcaacatca tccaggcact cgtgacagag atcggcggca  
75421 gactctatcc tcctccggt atcaacataa agcgggtta ggccaatgc cagccagaca  
75481 aagccactt tatcagacca tagcagttca aaattagtgc tttgtgaag atgctcggca  
75541 aacaccttc gtaccgctc aatctcagtt ttcttttt ctgtgtacag cattttcatg  
75601 tcctccttg ctaaaagtt tgggtgtac catcatcagt ttaacacaag gcggctggct  
75661 ttatcagccg gtcacatctg ctgtatctg ttttgagca taccttgat tttgcgctc  
75721 atggtttcgg tgctggtatc gctgaaatgg acgcgacct ttaggtggt cttgccgatt  
75781 ttctttacca gcgcgggggc gctctcggc gctctggcc gagtgggtg tcgggtctg  
75841 atggtacggg tttcttact catggcgtc tttctccg gcggggctgc gccgtccggc  
75901 aaaaaattac tcatgcttac ggtttacaat gtctttgcc gcctgcttg tagctccggc  
75961 gttttctcc cggaagtct tcccgcaaa gaggatcggg gcgcaccgtt ccaggatagc  
76021 gtcatagatg cggcgtggg ccaggctcgg cgggttctg agttcagcca gttcaggtt  
76081 ggtggtgatt atcatggcc tcggctcgc gtagcggctg tcaatgacga aaaacatctg  
76141 ctccatcgca tactcgtac tgcgtccac acccaaatc tcaatgatga gcaggtcgtg

76201 ctcgtcaaag ctggcgataa agtcggccct gtcctcggag aacatccctg tcaggcggtt  
76261 cagaatggtg ggaaagtctg tcatcagcac cggcacatcc cggtaagca gggcgttagc  
76321 gatacaaccg gcgaaaaagg acttgccgtt tcccacatcc ccaaacagca gcaggccggg  
76381 gttgttcta taagcctct tccagttctc cacataggcg cgggccttgt ccatcagggg  
76441 atttggccg ttgtcgttg caaaggtgta gtcgtacaga tagcggctt gcaagccctg  
76501 ggccttccgg cgttgatac gtcctatgcg gcgctgccgt tcctcggcgg ccttgccgtg  
76561 ttctcggcc tcccgctggc actggcagat acagcggggc atgaaatagc cgggtttccc  
76621 aaagcatggc acaacggctt gtctctggcc gccgcacttc ttacagtga tgaggccctg  
76681 tgccgggtct atgtactgt ccccgccag ttccacaccg gcggtcct gtctgatcag  
76741 cgcccggtt tctcggtaa tctcaatcat acggtttcat cctcctttac gctgtaatcc  
76801 cggttgcgag agggcggggc cgcttctg gcgtcctgc tggcccagcg ccggatggtg  
76861 gcggcatggc tctgatacc cttgccgta gaagccatgt actcggacag ctttctgatg  
76921 tactggcccc ataccgtgg aaagctggcc tgcaagtctg ccagttctc gtccgtcaga  
76981 aaaacattct ggtaacggcc ataagcggc gcgctctac tctctctatt ctctatact  
77041 ttatctctaa tatctaact cttatctcta atctctggtg gacaaatgtc cccccggta  
77101 tatggtggac aatgtccg cccgccgat gggagcagtt ttgacgctt caatcgata  
77161 cgctcttct tttccgtt cccctcggta gaagactggc cgatcagcag ttggatgctg  
77221 gccatgtagt agggccatc ggtcaaaatt tccacaaggc caaattcaag gaacacctc  
77281 aagccctct ccaccgtcc cacctgatgg cgggtaaagg tggcaatggt ctggggcgtg  
77341 tggggcaaat ggtcattgag catgaggata ccgccgtt tgagcgacat gaggtacatt  
77401 tcagcagca gattggagta cagcaggcca tctgcatac tctcaatat aacctcgtt  
77461 tcgctgtgt aaaagtttc ttcagctt agatagta atttcgtt gtctgacatg  
77521 ggttctctc tggggtcgt tttggctt tgtagcatt tagagggccg tttgggtg  
77581 cagaggataa atctatcagg ccccagcga caccctcga aaagtcctt attacaagg  
77641 ggtttcggc cctaaagcg tgacatttag ccctctgtt cgcttgcg tggcggcct  
77701 tgatacgct catgctccg gcacattcc ggcaattt ggcccgtt gagccggggg  
77761 tgaacagcg cccgagacg gcgcaccgt tggcgtccag gcggtggaac agggccgtt  
77821 ccagttcct gtccagcggc agcaccggc cccggaacca ccggcacaac agggagtagg  
77881 aatggactg gacgagaca cttcctcc catcatccag cgcgatacag ttgccccgt  
77941 catagttgca gactcatgt accagccgc gcgctctgc gtattggcgg tagtccatga  
78001 cggggacggg ttcaggctt ctttctca tgcctgact tcccacacc gccgcagttg  
78061 ccgagccct ggcaagcat ggctccgt tccggccgg tggcgcgct gccggttcc  
78121 ggctgcaaga gggcaaggg caggcggata ttcaggtgga cagtgcggg taaaataatc  
78181 tgctcatag ggcaatccc ttcatgagt gaatgtgac agttctgtc aaaggggtg  
78241 cgtgaaacgc gacgccctc aaaggggtc caaaaacgc gtaccctta ccgttccggc  
78301 ccccgctcat gggactgtc ctgttctg cggccagtt ggtcggcggc ctgcccggc  
78361 cgttcaacgg cttcagttc ctccgcatg gccttcatgt cgtgggtgc cacctgctc  
78421 tgggcagta gcaggtcaat ctgcgctgc catgccttg gggatgattc ctcccgtg  
78481 tctttcagtt cttcagata cgggagcc gcgtataga ggatcagtt ccggctgtg  
78541 cgctgctga acagttccc tttcggc ttgacctg caaactgct gcggatggc  
78601 ttgactgt gtactgac ccacatct cgcgctcgg tgagtgtggc aatccggc  
78661 tcggcttga cgtctctcc ccgaggtca tagtagcggg tttcatatt ggtaatttt  
78721 ttatggagct gctgatggt ctgattccg ttgctgca aaaagctga caggcggcg  
78781 ctctctgca aagccggat tttccgggt cgggtgctg gccgctgag ctgctgctg

78841 gcctcccaca agtcaatcat gctgggctgc tggccctccg gcttctccgc ctcggcctta  
78901 gaccagtgtg agaggcgggt aatgcgggcc ttgatttctt ttagcagctt gttgtcggcg  
78961 gcgatctgcc ggttgacttc tccctgtcgc gtgcggatgc cgcgcttctc catctggctg  
79021 gccgctggcc ccaggtggac agaggggatt ttatcaatgc cccggcgctt gtagctgcgg  
79081 tggctacca gggcgggctg accggcgcc tccaatgcc ggttggtata agccgccat  
79141 gcccccgc aaatctccac attcctttg tcgttccagt cgggtgtgct ccccgggtg  
79201 ttctccagc gcctttccc atccgggata cgctggcctt tctctccag gtcgtatgcc  
79261 ttgcggcact tcgcgccca tgcgccattt tcttcaggg gccggacggt cagcatgata  
79321 tgaacatggg ggttgccgtt tccctgtca tggatggcaa aatcggcga catcccctg  
79381 tccacaaagt tgtccttca ataaagccgg acaagggcaa gctgctgtc cctggacagt  
79441 tcgcggggca aagccgctc aatctcacgg gcaagctggc tgtccctggc tttctgatc  
79501 tgctcgacac tgttccagag ggtggagcgg tctgcaaact ctggcggggc gtggcgggc  
79561 agcatgattt ccgcatggac aacaccgcc ttccgggtgt aatcatgggt caggccgtcc  
79621 cattcattcg tcagtttgg tccgtcgcgg taggcggctg cggcaacagc ggaacggccc  
79681 tcgctgcgct tgatgatact gacgggaata tgacaaaaat ctatgggtgg cacctcctt  
79741 cggcggggat atttcaggct ccgtggagcc gaacagacgc gaagcgggtg tttggctgcg  
79801 cggggcgcac aaggggtttg gggagtgtag ctccccatcg cggacgaagt acgcaacagc  
79861 cccggcagg gcgcacgaca cggcaacgg tgtataatg cgccttcta aacaaggac  
79921 ttatggctg tccccgatt tcggcagttt cgcggccagt tccgccccc ctggaagatg  
79981 ggacagggca atcaggaacg ccttgacctc tacgccggga agggcggggg ccagagggaa  
80041 aatgcctcc aaaatggccc cgcgtcaat caggcggcgg gtgcggcct tgcgttctc  
80101 attcgctgc ttgttctca aaatcttctg gcggttctca agctgccga tttcctcag  
80161 gacttctcg cgtcgtctt ttttctgtt cgcttgggtg gtgctgtctt tgtcatatc  
80221 gcttctctt ttggcggctt catccagccg cgcttgatat aatattctg taacttgata  
80281 atagcgtgc gaaccgtgac aatggctgct gatgtcgtga agcctcggc ctcggcaatc  
80341 tcctaaact gcttccctc ccaaaaccgg gcgtgcaggg agcttgctg ccgtggcgtc  
80401 aggggtggca gggcctccg gagccgttc atcatcaggg cataggcggc ctctgttcc  
80461 cgttccgtt ctttctccat cagaatatct tccggggaga tgacctgtc cggaaaatgg  
80521 tgttctatgc cgggggatgc gtccagagaa taacaatggt agtgctgctt ggcgtcattg  
80581 gcgttcttg cgcggcttc ctccaatg gcgtctgcaa cctcgtccg cactccaca  
80641 aaagtgtct tcttgcaat cggatagtag tatttttca ggttgatggt tttcataggc  
80701 cgcttgcca tttccggcgt atgaagtacc ggcgcagcc cggagcgc gcatggatgg  
80761 acttccagc ctgggatggg gtgatacct ccatcgcggc aatgccttc actttcatcc  
80821 ccagcatata cgggcatga acgcgccggg cctgcgttgg ggtcagagag gaaatggcct  
80881 catagaccg cggagcagt tcggcatatt cggcctgccc ctcttttcc atcaggcaat  
80941 cctccggcga aggctgcgc cagccgatgg cggcgttctc aatccatca ttgagtcaa  
81001 gggagtaaaa cgcctttag cggtacatct tgcgtcctt ggcggcctc gcccgttgt  
81061 ccagcaggaa gcctcgaca attcatccg acacctcac aaaggtgtcc tcggtcaga  
81121 acggataata ctgttgagg ttgatggtct gcataggccc gccctcact tgccgaaaa  
81181 aggccgtcat agcagcggcg catattccg aagccccgc gcatggcaac gctgacctg  
81241 ctgctgtcta cgcctcctt cgggagatt tccggctggc tgataccggc gatgtagtag  
81301 gccctgacgc ggcgggctg tgtgggggtg gcatgggcca gggcctccg caaggcagcc  
81361 agcagccga gatggcgggc ccgttctcgc cgtcctcaaaa ggatttctc cggcgtatc  
81421 ccgtgttcca gcgcatagtt ctccgtccg ctatatgct ccagagagta gtaggcgagg

81481 tggtagacct tccggcgctc atagtgttc atctcgcgct gggcctgccg catgacctcc  
81541 caaacctcat cgctgacctc cacaaattca tcgtgccggt agtgaggata aatccaccgc  
81601 agattgattg ttttcatagg cttacctct gaaaatggga gaggcgggca gcttgccgc  
81661 tgtccgctc ccgctgggat aagggaaaca atcccttca cttgtagcc cgaagggg  
81721 tcattcgta agcctgttt caaagaaatt tataaattt tttctgact cctccacact  
81781 ctgatacacg gccactttgg agcagccgca caccgtccc atctccgca gggcagccc  
81841 gtccagggca tagagcagga accggcggcg ctggcctcg gtgcaggtg ccaggacggc  
81901 catcagctcg tccagtgtt ccatgcccga aaggtattcc tccggcgtt cgccgtagat  
81961 acccagccc tcggtggca ctatgtatt gcaaaactcc cggccatccc aatgctgcc  
82021 ctgctcatgg gacaggttct cggctttg gtcggcccgg tcaagaaatt catagactc  
82081 cagcgtgacc tccacggcca cagcttctc gttataatt atggtgact ccatcggct  
82141 ttctccgtt cagattttg cgggaaaatc tgaacggggc ggccggggaac gacaccggg  
82201 acagggttcg ggccatgtt gccgatgtt ccggccccc aggtatgaaa aagcggccc  
82261 acagcagaaa gctattcgag cgcaaaaaat acggtattca gttacattg gacaatttc  
82321 gcaactggctg ccagacgggg cctgttcggt ggccgggatt ttttgacga tagtgcaat  
82381 atcgtctgaa tttgttggcg gtcagtgtc tcatggcgg ctccctccta aagccgctg  
82441 tctgttagt attagaact ccttctatg agagaataga aaccggcggc cttgaatgc  
82501 ttttaaac gccccggat aaaaatgtaa attgagcgc caaaagcagc ctgcccgtt  
82561 acggttttt tcttccccg tttacggggc aggagcgtt gtaagttata tttattctat  
82621 tgtttattt ttctgatat tgataatcc ctgagtcaa tcccggtaa aggcctcctc  
82681 gtgcgatac agcaatacc ttcccgaaa agttgaaagg gctgtttca aagcctttt  
82741 tgctgtaca tctaaatgt ttgtaggtc atccataatt aagaaattgc agggagtcag  
82801 agtaagcaga cacatttta ctttgcctg ctctccacc cttaatgtc ctatggcctg  
82861 catagcgtg ttactggaaa tcccacatc tgctaaatg ttgcggacat ctttgtcac  
82921 catattggga taagcattg caacaattg aatgggcgtc aattcagggt cttgccactc  
82981 taaatcctg tcaaaatc cgatagtaac ctgacggaa aattgaaat ggcctgcat  
83041 agatggaatt tcccacatca gggttttta cagtgtcgt tttcaatcc cattaatcc  
83101 agtaataaca actttttgtc ctccctaat gctaaattca atgttgata aaacgggta  
83161 atggtagcca actgccagat gttcaccaa caagtgttct gtattggta atggaagtac  
83221 gggaaaatg agtatggaa taatttctt ttggtctaag gttccatct tttccatccg  
83281 gtcaagctg tttgtcgtc ccctgccat tttgctttt cttccgcta tgttctccg  
83341 tataaattc tccgtcttt taatttctt ttgctgggc gcatattgtc ttacataatc  
83401 ttcccgcagc aaagtttct ttcgcaaaa ttcggaatat gtgcatagt atttgtgat  
83461 agtatcgta tcaatatcac aatgctggt cgctatctta tccagaaagc cataatcatg  
83521 agaaactact aaaaaagcat ttccaaagc agataaatat tctgccagcc atgtcacatg  
83581 gtctttatca aggaaattg tcgctcgtc cagcaacaaa acatccggtt ttccagcag  
83641 caactcgtc aaaattact tggctcgtt tccgccactc atttctgca tcgaacggtc  
83701 aaggccaata gccagaagtc ctaaccatt ggcgacacgc tcaatggctg tatctatcga  
83761 gtaaaaatcg tgggctcaa gctgctctg ataataggcg gccagtcaa ggctttcat  
83821 atcggctca gcagctttt catagagctc cattgcctgt gttccatat caaatagctt  
83881 tgagaaagca gatttaagaa atccttcat cgttagggaa tggtaattt ccgcatattg  
83941 gtctaaataa ccaaccgtg tatttggtg ccagacgata cgcccgtgt ctggaatgat  
84001 ctgctccgta cagattttga ttaaagtgt tttccgggt ccgttctgtc cgacaatacc  
84061 aatagtctc ccctgttga gtgtaaagcc tgcattttg tatagcat tcttccaaa

84121 agagtgtgc agtccgtcaa ttctaataa gtcctggtt atcaacctt cctgtatatt  
84181 ctgggcaaaa gaaaaaggca gaaagcaaag atacataagt gtatctgcct tctgcctctg  
84241 gcatagtagc tcaaaaacaa aaggccatgg acaaaacatt gtccatagcc tcatacacat  
84301 tataactgca tgggaagccg ctttctaaaa atgggtataa aatcccctt gatggcttc  
84361 cgatgaaatc taaatgcgtc gtttatacgc tatactctgc acaatgtttc atcggtatgg  
84421 attgtacaga gttgatttc ttttacgct gatcggtaaa atgaaaattc atagtcatgc  
84481 ctttatctcc tttgagagg tacaactctc gattctaata atactatgag gggttcaatt  
84541 tgtcaatcgt gcctcaaga agtacagata ataagtaaaa aacttctgct gttcatcta  
84601 tgtccaaatt agttcgttaa aaataactc ctccgctgc gcttcagcg tttcatcag  
84661 cccaccag cgcatggggc cacgggatt cagttctcgc gtgacgccg ccgctccat  
84721 catgcggggc agcatggcgt ccatccgtc atgcgccgc cagtcaatc ccaacaggtg  
84781 cgggtacagc tttcgtca aatcaagct gctgtaaagg ccgggcccgt gttcctcag  
84841 gtagcgtgc cgcatacggc catactgcc gatggggcc tccggctgct cggaaagttt  
84901 caggtcgggg atgtagtaat ctccgagcg ggtgtaagc aatttctca tttcattc  
84961 ctttgcact gtgatggtta aactgcggca ctggcgata cggggcctt gcgcggtcc  
85021 tgcttaagta actggctgac ggtggtaaaa atgccctt ccatgtctc ggcccggatt  
85081 gcggccttg ccgctccat tttgcttg cgctggcgt ttagcgttc tcccattc  
85141 ttctgctgc cgtttcctt gcggcgtaa tagttctgt gcaacctgc cttgcttc  
85201 tctttctc gcagttctc ctgttctc ggggtcaggg gaaccggctg caaggcggg  
85261 gggatatacc ggcccacaaa gttgaagtag attcaacct cctgcgtggt gtcctggctg  
85321 ctttgcggg cgcgttatg gacaaggatt ttcttaca actcgttgag catggtatt  
85381 gtcagcgtg cgaaatttc atactgtca atcagggcaa taaacttctc gcagatttc  
85441 cggctctgct catagccgtt aacggcctt tccagttccg tgattccgc attaagggc  
85501 tctgtctt tggcgtattg tgcgtccagg gcctcacc gggcgtccg cagttgccc  
85561 agggcgtgt cctcgtgat ttgcaaatc agctttcca gttcccggc ccgctttg  
85621 gcggcggcca gccgttccg cttctggat atgtcggcg tctgttggg gcctgcgtt  
85681 tctggacgg tgcgataaa ctacggcg tcttcttg aatactccg gatggccg  
85741 agcatatcg caatcagggt cagaacagct ttggcctga tacggtgctg ttagggcag  
85801 agggagccga taggtactt actatactg ccgcaagtgt actgcgggac gcgctgccc  
85861 ttgatgtgc ggtgaacata catcttgccg ccgcaatcg gcagatcat caggccggtc  
85921 agaggatggg cttcccaaaa gccgtctgg tagcgtctg cgtttccc gatacgtgc  
85981 acattgtcaa aggtttctg tgcgataat gcctcatggg tttctcga aatcgtccac  
86041 tgccttct caacatagtg gctttctt tcctgaagt gcttgcggg cttgaaattg  
86101 atggtgtggc ccaggtatt ccggcgtt agtatctgga caactgtgga cgatcccag  
86161 ccgaggggt ctttacagt cttggttt ttacgcctt cccatgac ggcaaggtg  
86221 accgatgaa gttcatttt atcagctgag agttgctgt caatctgata agcccgtg  
86281 ctttcaatg ccagcgaaaa aattcggcg acaacatcag cggcttctc atcgacaatc  
86341 caattttcc gtttctgc ccacaagtag ccgtaggcca caaagccgg cagatgctg  
86401 ccgctatgc cttggctt gaacacggag cggatttt ccggctgtgc gcggcataa  
86461 aactgttca taatgttgc gaaagggta aatcatcat gcccttcag actgtccaca  
86521 ccgtcattga tgggatcag ccggacaccg cgctccgca aatctccat gacctggcc  
86581 acttcagat agtcgcgcc caggcggctc atatcttga taacaatggc ctccaccgt  
86641 ccggcctga cttctccat catgccaga aaaccaggac ggtcaaacg gttcccgat  
86701 acgccatc cgggtgaagt ggtggggtt gcgagaccat tccggcggc aaagtctct

86761 aacatctttt tctggttcga tatggagtta ctctgccct gtaactcatc atcgcggctc  
86821 aaacgctcat acagaggggt gattttctcg tttctcatgg ctgtacctcc tgaatgaaa  
86881 atgctctaag tgactgcttc actaacatg acaaaaacta tgattaagaa gtcacttaga  
86941 gcatacatct cccgcgcca atttatatt tgggtactgc ttaccgcga aatggtcggg  
87001 gtcgcgttct tccaagtcgg caaacagaa atcgacgggg ctttgatatt cctcgtcgtc  
87061 ctgcgggct tgcctggcgt tgataagttc caacaggga ataaagtca tttcctcggc  
87121 gggggcttcg taccagatgt agcccacaa cgcgcaatac aaaagccgtt ctgcctttac  
87181 caaaaatcc tccgcgcttt tttctcctc acctttgga ttcgctatca acgtattac  
87241 cagcttcaaa atatcttct cgctcggat atacacaaag gggttgtagt gcatagattt  
87301 ttgaagttc atcgattca gtacctaat gcggtagccc gcccttgca gcagcttccc  
87361 gcactcaatc aaaaccgtac ctttcgggtc ggttaagacg taagaggaat gaagctgcat  
87421 tagattaggt ttgacaaaa atctgtttt tccgctgccc ctgcccgca tcacgacgac  
87481 gttcttattt ctgcgtact tggctgctt cgggcggctg ttcattgtaa gccgttccgt  
87541 ctgcgtcaaa atgatgtgt tttgaaatc cgggtctatg tagggcttta tatcttcggc  
87601 gtttcccat cgggcagagc cgtactccgc gcccttgccg tatttcttcg cgttttccc  
87661 ttgacatag actatcaagc ggataatcac cgcaccgaca atgccgaca gcaaatccaa  
87721 cgggtaaacc ctccgcaagg cgttttcaaa ggctcggaa aatcctgtg tgatattcag  
87781 tatctttgca gaaatatccg cgcgggggc aagccgacc gcctgtccga ctttatcaa  
87841 gagatagaca aagaacacat aggggatatt cggaagtac agcttttgt agttgatctg  
87901 cttcatatct cgcgcccct gtccatttc tttacctgt cgcgggcggc gttaaagctc  
87961 ttcgcttgt cttttgcagc ggcaagggt ttgcggatag agggctttt ctcccggttc  
88021 agcttcttg cggaaaactc ttgaaacgct gcggtcataa cgtccgctc ccggccttg  
88081 aaaaacaaa ggtaacgggt ctgctgccc ttaaccttt ttagcgaaaa atctatgtt  
88141 tatttcttc cgtactctc aaaggctta atattgctgt cggatgctc gatgttgaa  
88201 acaccgct tctgctcat aagctcggc atggtctgt tccatgccc gggtttctt  
88261 ttctgctca aaaactttg gattgcttc tgtaacgct gttcgtaag ccgcccgcg  
88321 cttttcca cttgacgta tagggcaatc gtttttggg ttacttctc ctgcaaggta  
88381 tcaactcct tcccgtaaa gtgcggctat gctattcgc cccgtataa gtcgtgattg  
88441 acaagggcgg tatagtagct gtcaatgga ctccgcccgt tgaacagcac cgcttttaga  
88501 tactgcttga tgttcgac tttggtgtg ttctcctca tgcaatcaa acaaaacta  
88561 atatggctgc tttcagctt caaaaactg gatttacca attcggcggg gtagctgctc  
88621 ccggcaatac ggattgtct tccggctgtg cagacggtt ccagcataag gtcaacaatc  
88681 tcgtcaaac ggtctttgc aattttgcag tttgaaatga gatggtcgt ttcgatattg  
88741 tcctgataa tctcctgta aatcttact gcgctattgc tttcgttc cgttctttc  
88801 ctttccggc gcgtagccg ttcgcatgc gcaaaggca aggggttag ggaatggaaa  
88861 ggaatggaat cgttactga taaatcagta attgattgt tttactta tatatctta  
88921 ttaattgct ttgattttc caacgtagg ttttctgct taggttttc caacgttga  
88981 ttatccaatg ttgattttc caatgtaggt aatccaata taggcggctg tccgccgctg  
89041 gtagctgct cggctctcg cggctcggc tgctcgtata tgacgtaac tgcgccccg  
89101 aagcgtcct ttcgtcgc ctcccggctg cgcacgatat atccggctt ttcgagttc  
89161 tttaccgct cgcggattgc gtcgatctc tccgggtga tatgggataa gcccgcaagg  
89221 gtataatccc aatcttcggg cagcgaagc atttgcgaca acaagccct tgccttaag  
89281 gacaattcct tgtttcga gtgggtgtg ctataacgg tatatccgt attcgtcc  
89341 acttgaaaa ctgcatatt tctcacttc ctcttgggt atgctggac aatagaaa

89401 ccgttttcg cgttttgg attgcaatat gccctttgcc gttttcgcgt ctgcaaagcc  
89461 gcatggcaca agggcttttg cccgtctatt tgtccatgct ggcgtgcgtt tccgcgtcc  
89521 ttttgccggg gcaatagga cactcttga aaacgcaaaa ctcatattc caccggggc  
89581 ggtagaacg gcaagtccg caatctcat catctccggc acaaccggat tgatagcgg  
89641 caaatcccg cttctgctg atgagcaatt caaaccccc ctgcttgccc tttgtgaaat  
89701 acattccggc tgcacctct ttctgcggg cataaaaaa cggcgttact ttctcccca  
89761 aaggggttaa ggtaacgcc tttgtgctg tattcagttt ttaacacatt ccctgtctat  
89821 ccgctgtccg caaaaccatt gatttatta gctttttgcc gctatcgta tcacacctca  
89881 ttatttcaa gaccgggtt tcaagccatg cttgcggaca tgaagccgg aaaagtccgg  
89941 acagttatc taaaggatg gtcgaggta gggcgaaact acctgcaagt gggaatgtac  
90001 acggaaatga ttttccaca gaaaggcgtc cgcttcatc ctatcaatga cggagtggac  
90061 agcgcacagg gcgacaatga cttgccccg ctgcggaata tcttaacga atggctggtg  
90121 agagatacga gcaagaaaat acgggcggtg aaacgctcaa aaggcatgag tggcaagccc  
90181 atcacaagca agcctgtgta tggctacctc atggacgagg acgaaaattt cattattgac  
90241 gaggaagctg caccgtagt caagcaata tacaacctc gtcttgccgg gaatggtccg  
90301 accaagatag cccgtatgct cacagagcag caaatccca gccgggaac gcttgaatac  
90361 cgcaggacgg gacacacca ccgttaccac cccggctatg agtgcaagt ggcgaccaat  
90421 actgtgtgc atatcctga aaaccgggaa tacacgggct gtctggtaaa cttcaagact  
90481 accacgcaat cctacaagt cagcaaaatc attacaatg acgaggataa gcaggcaatc  
90541 ttgaaaacc accacgagc tatcatagac actcagacat gggaacgggt gcaggagcta  
90601 cgcaagcagc gtaaaccgcc caaccgctat gatgaagtgg gcttgttct cggatactg  
90661 ttctgtgag attgccgag cgtcatgtat cagcagcag accagacgga caagcgaag  
90721 caggactgtt atatctcgg caactacaag aaacgaccc atgactgtac ggcgcactt  
90781 atccgcaccg acctctgac cgctggcgta ctctcaatc tgcggaaagt gaccagctat  
90841 gcggcaaagc atgaagccc gttatgaag ctcttgattg agcagaacga ggacggggc  
90901 aagcgcagga acgcccga gaaaaaggag ctggaagccg ccgagaaacg catagccgag  
90961 ttatccgta tcttaagcg gctgtatgag gacagtgtg cggggcgc atcagacgag  
91021 cgtttcacag agctgtcgg agactatgaa gcagaacaac gggagctgaa agaaagacc  
91081 gttgctatc aagcggagct ttcaaagca caggaagcca ccgtgaacgc agaaaagtt  
91141 atgaatgtt tccggcgga taccagctt gaagaacta cccccactc gctcggggag  
91201 ttttagaga aaatcgtt gcatgagtc agtatgacg agaacaagac ccgacagacg  
91261 gacattgaga tttattatc tttgttggc aaggtggact tggccaata accgcccag  
91321 ctatccgaca caagagctaa gtcccgata ggaacggca aatttttac acttctatta  
91381 cttcttatc gcacatcag aaagagccg gggatcaagc agcttgcgc gggcggaggc  
91441 gtggcctca ttggcatgac cttgttccg ctgctgtccg ggctgctggg ataactgtt  
91501 ggtccatctg caagcaata gccgcacct cctgctgctg ggagggcgc gaaaggagg  
91561 gatacacaca tgattgatg ttaacggg gaatggatca aaggcatcct gattgacggg  
91621 atcaaggaa acctgtccg cttttcagt accgtgaata ccaaggtcgg gaaatcgca  
91681 tcggatgtg gcagcactcc gcaggactg aacggcggca tttttccat gctgcaaacc  
91741 ctgtccgaaa cggctattg cccattgcg gcggcgattc tcgccctggt gatgtgctat  
91801 gagctgattg aatgattg gaaaagaac aacatgcag actttgatac gtcctgttc  
91861 ttccgtgga ttttaagag cgcaattgcc atcctcattg tgacgaacac atggaatc  
91921 gtcatggcg tcttgacgc caccaggcc gtcgtgaacc aaagcggg ggtcatcatc  
91981 ggggaaacca gcattgactt tgataccctg attccgcatc tggaaaccg gctggaagcc



92041 atggacatcg gccctctggt gggcctgtgg tttcagacc tggttgttg gctgacgat  
92101 cagcgttat ccatctgcat tttcctgtc acctacggga gaatgattga aatatacgt  
92161 gtgactgctg tggggccgat tccccttgct acgctgggaa actcggagtg gcgcgcatg  
92221 ggccagaact acttaaaatc cctgctggca ctgggcttcc aagcctttt aatcatggtg  
92281 gtgggtggga tttacgctg gctgattcag gacatcgga cgatggagga tatttccggc  
92341 gcgatctggg gctgtatggg ctatacggtg ctgctatgct atggcttgtt caaaaccggc  
92401 agcttgcca aagccgtatt cacagcccat tgacgcgaca ctattgcac aggaggaac  
92461 aggcttatcg agaaatcaca gaagaaaacc tatcacatta tttacgctga cccgccgtg  
92521 agatatgacc agaaaacggt acagggagca gcgaaaacc actatccac catgggaatc  
92581 gacgcgtgt gcgctctgcc ggtggaaacc ctggcccca aggactgcct gatgtttttg  
92641 tgggccacgt tccctatgct gccggaagcc ctgctgctga tccaggcatg gggcttacc  
92701 ttcaagaccg tggcctttgt atggctgaaa cggataaat aagtgtctc gacacttca  
92761 ctccctgcc cctcaatctt gagggtggg ctgctttt tcttctatct gattcataat  
92821 tatctcatga acatcttaca agagattttt aaagacaatt acgaaatcat tcaatatacc  
92881 tttcatcca gagatgttga aatggaaaat atctctaaga tgattattg tggtagcct  
92941 tcctttggcg gctccatgta tgcttccct cactgctgca acttgaagtt cgttctttt  
93001 cgctgcaaaa gccgtttctg tctacctgc ggggtcaaat actcccagga acgctccact  
93061 caaatggcct ttaaactaat acgctgtact caccggcatt gtgtcttac cattgatgaa  
93121 gaattacggc actttttct ggataccgc tcttcttg actgccttt ccaggctgtc  
93181 cgcagtgtg tctgcgtat gttcataat ctcaacaaat ctaaaaactt tgtcccggc  
93241 atcgtctcg tccttcacac tttggcgt cccctggaat ggaatctca tatccactgc  
93301 ctatttccg aaggggatt ctccgatgac ggcttctggc gggctgtaa gcattttaa  
93361 tatacctct taagaaagtc ctttcagaca gcttctca atcttctga agcccgatt  
93421 ggaccttct taaaaaac gaaagctctt atctaccata aggataaaaa tggttttat  
93481 gtttatgcca aacaaatct ctgtgatac gatgcggtca ttaaataat cagccgtat  
93541 ctggccgcc ccgtcattgc cctgaaacgg attgattcct atgatggcac taatgtcaca  
93601 tttcactata accgccagc agacaatgcc ttgtaaaaa ggactcttcc tgttatagat  
93661 ttataaagc tctgattca gcacatccg gaaaaaac ttaaatgac acgttactat  
93721 ggtctttat ccaggcaccg tgataaagat aatcacttt ggaaggctgt tcaaaatcc  
93781 aggaccgcc tgatgaaaac tttataaaa tggcgtgaag acatccttct gtctttggc  
93841 tatgaccac tcaatgtac acaatgcagc cacgaaatgc agttcgtaga gctttattac  
93901 aatcatgcc gtgttctct ggaagaatta tatgaaagg caatggcaaa agtaaaatg  
93961 cgttctgctt gattttcca cctgtctgta ccatactat ctattaaca gacaggaggc  
94021 ttctcatgga tcaaaatct ttagaggaac tacggcaaaa atatattca aaccgccgg  
94081 aaggaatgac agccaaactg gtcagaacta tgtctgattc tgatctgctt gatatgcatg  
94141 aatttctac ggaggataat gacctggatg acgatgaatt tgaagaaggc tttatattg  
94201 accttttta accaccgtct gttgctttg cccgcatttt gcgggctttt tttatcaat  
94261 ggttcgcat ttggcgaact ttctattat acaagaaaag cccacctgg tttacgggc  
94321 tggggcactg gacaagggc aatgcgaaa tctgcctgct tgccaagcgg ggacaccca  
94381 aacgtattc ccgcagctc catcagttta tcaattccc cattgaggaa cacagcaaga  
94441 aaccgacat caccgcgag aaaatcatcg agcttgcggg tgacctgcc cgcgcagaac  
94501 tgtttgccag acagaaaacc cctggctggg atgtttgggg caacgaagt gacagcgatt  
94561 tttccctgtc cgcaccagaa acgaggtgat tttattggc ttatgtcact gtcccaagg  
94621 atttacca ggtgaaatcc aaggtggtat tgggctgac gaaacgccag ctcaattgtt

94681 ttggcgggtgc gctgctggtc ggtgtccgc ttttttgtt gatccggggc cgcattccca  
94741 ccagtgcggc ggcgctcctt atggtgtttg ccatgcttcc gggctttctg ctggcgctgt  
94801 atgagcgcca cggccagccc ctggaagtgg tggtagacca aatcctggag tgttgctttt  
94861 ttacgcccga ggaacggccc taccagacca acaacgctta caccgccctt gtgcggcaat  
94921 tccagatgga acaggaggta aatgccattg ttcaaaaagc aaagaaacga aacgagcgca  
94981 aaagcgccgg tcaggctcac ccgtgccgag caaaaagaaa ttcaggccgt catccgcagg  
95041 tataagggcg acggaaagcc cactccgcc caggagagta tcccctacga ggccatgat  
95101 ccagatgggg tttgccgtct gacgccccgc aggttttcca agtgcattca gttttcagac  
95161 atcagctatc agcttgccca ggcggacacc aaggcgcca tctttgaaag cctgtgcgac  
95221 ctttacaact atctggatgc ctccatccac atccagtttt cttttctcaa ccacaagatc  
95281 gaccccaggc agtagccaa gagcctgaa atccgggccc agggcgatgc ctttgacgac  
95341 atccgcacgg agtattccgc catcctaaaa gaccagctcg tcagcgggaa caacggactg  
95401 gtaaagcgga agtttctcac ctacaccatt gaggctgaca gcctgaaact ggcccgtgcc  
95461 agactgcacc gcattgaaac cgacctgttg ggctatttca agagcatggg ggccgtggcg  
95521 tgggggctgg acgcaacggc ccggctggaa gtcattgcacc gcattgttca cccggacggg  
95581 gagccgtttt ctttcgattg gaagtggctg gcttctccg gcctctccac caaggatttt  
95641 atcggcccgt cgtcgttccg tttcgggaaac gcccgatgt tcgggctggg aggcaagtac  
95701 ggggctgca gcttctaaa catcctgtcc ccggagctgt cggatgaaat gctggccgac  
95761 tttctcaata cggaaaacgg cattgtggtg aacctccatg tgcaggccat cgaccagagc  
95821 aaggccatca agacggtgaa gcgcaagatt accgacctgg acgcatgaa gattcaggag  
95881 caaaagaggg ctgtccgag cggctacgat atggacatcc tcccagcga cttgcccacc  
95941 tacgggacgg acgccaagga gctgctaaag accctgcaa gccggaatga acggatgttt  
96001 cagctcacct tcttctcct caataccgcc gacaccggc aggcgctgga aaacgatgtg  
96061 ttttgggccc caggcgtggc acagaaatac aactgttcca ttgtacggct ggactaccag  
96121 caggagcagg gccttatgag cagcctcca ttaggggcca gccacatcca gattgagcgt  
96181 tctctgacca ctccagcgt ggccgtgttc gtccccttg taacgcagga gctgtttcag  
96241 gatggagagg ccatgtatta cggcgtcaat gccaagaccg gcaacatgat tatgcttgac  
96301 cggaagcggg cgcgctgtcc caacggttta aagctgggta cgccaggaag cggcaagtcc  
96361 atgagctgca aatccgaaat tttgagtgtg ttcctctgta cgccgatga cgtgtatga  
96421 tgtgacccgg aggccgagta ttatcccctt gtaaaacggc tgcatggaca ggtggtgaag  
96481 ctgtcgcca ccagcaaat ctatgtgaa cgcctggaca tcaactaaa ttacagcgag  
96541 gatgaaagcc cgtcggccct aaaatccgac tttgtttgt cgttttgtga actggtgatg  
96601 ggcggcaaga acaggctgga cgccatcgaa aagacggtca ttgaccgggc ggtgcagggtg  
96661 atctaccggc cctatctggc agaccacgc ccggagaaca tgccatcct ctccgacctg  
96721 cacaagcct tgttagacca gcatcaccg gaggccgacc gggtggccca agccctgac  
96781 ctgtatgta acggcagctt aaacgtgttt aaccaccgca ccaatgtgga cattgaaagc  
96841 cgcattgtgg ctttgacat caaggagctg ggcaagcagc taaagaaaat cgggatgctg  
96901 atcgtccaag accaaattg gggccgggtg acgcaaaatc gcagccaggg caaggccacc  
96961 tggttctttt gtatgaatt tcatctgctg ttgcgggagg aacagacagc ggcctttcc  
97021 tgcgagattt ggaagcgttt tcgtaagtgg ggcggcatcc ccacaggtgc cacgcagaac  
97081 gtcaaggatc tgctttatc gccggagatt gaaaatatt tggaaaattc ggacttcatc  
97141 tgctgctca accaggcgtc cggcgaccgg cacatcctg cggagcgatt gaacctatcc  
97201 cccagcaat tacggtatgt ggaaaattcc gaaccggcg aggggctttt gatttacgag  
97261 aatgtagttt tgccccttaa gaatcctatc ccaagcaca cccagcttta ccagatcatg

97321 accacccgct taggcgagag ggccacgcta tgaggtgctg ggccgcaaaa ggaggtggcg  
97381 caccatgaag cccttaaac cccgtgataa ggtgacgcag cgcagaccc gcgctgggct  
97441 tacactggac aaccagacca cggcgagag catgaacatt tccagccggg aggccgaacc  
97501 ggaatacacg gccaagccgg atggtacagc ggaaaaggcg ctggaacggg ctgtggacat  
97561 ccgcgaccgg cataaggcaa agcaggcggc cggcatgga gagcgtatgg caaaggaagc  
97621 cagcggcccg gcctcccgac tgcaattac cgccaggaa cgggcctccc cggaactggc  
97681 cccgtatatc aaacaggcgg agaaacgggc cgaccggctg gatacagcaa aaagcgcct  
97741 cccgaacagg cgcgtgatta ccaaggaaac cgtctacaac gaagccaagg gaaaggccag  
97801 aagcaactt cactttgaga aagtggagaa acatccgca aagctcaaac ccaatccggc  
97861 cagccgcccg gtgcaggagg cggggctata cctccacgga aaaatccatg aggtggagca  
97921 ggaaaatgtg ggtgtggaga gcggcataa ggcggaagaa ctggccgagc gccaagcggg  
97981 caaggccctg agaaacgca gacggcggaa taagctgaaa ccctaccggg ccgagccaa  
98041 ggcggaacga aaatccatgg ccgcaatgc cgagtttgat tatcaaaaat ccctgcggga  
98101 caaccggaa ctggcgagg cggtcacgaa tccatttcc cgcctctggc agaaacagca  
98161 catcaaacgg gaatacgcga aggccgcacg ggccggcggc cggggcgcgg caggcagtg  
98221 caagaccacc gcatcagccg ccaggaaagc gcagagaaa ggtaaacagg ccgctcct  
98281 tgtggcccgt cactggaaag gggcgctgct gattggcggc gtggcctca tgctctgtt  
98341 tctgatggg ggcctgcaat cctgcaccgc catgttggc agtgccggga cgggacttg  
98401 ggccacctcc tatctctcg aggacgcga tatgctggga gccgaggctg cctacgcccg  
98461 gatggaagct gatttacagt acgaattgga cactacgaa acctgcatc ccgctacga  
98521 cgagtaccgt tttgagctgg acgagatcgg ccatgacccc tatgtactga cctctatct  
98581 ctcccgctg cataacggcg tgttcacctt ggaggaagta tagggcgacc tgccatgct  
98641 tttgagcag caatatatcc tgaccagac ggttgagac gaaatccgct accgcaccga  
98701 aacgagtagc gacagcgagg ggaacgagta cgaggaagaa gttccctaca cctattacat  
98761 ctgcaactg acgctggaaa acagggattt atccacctg cccgtctccc tcatggacga  
98821 ggaagcatta agcctgtac cgcctatat gcagacgctg ggcaaccggc cagaccttt  
98881 tccaagcggc agctatcca atgcctccac cattaagag ccgacctact atgaaatccc  
98941 accggaggcg ctaaaggatg aagcctttg ggccatgatc gcggaggcgg aaaagtatg  
99001 tggctttccc tatgtctggg gcggcagctc cccagcacc agctttgatt gttccggct  
99061 tattagctgg gtgtcaatc attccggctg gaatgtggga cggcagacgg gcaggggct  
99121 ttacagtctc gcacccccg tttaccgga acaggcaagg cccggcgacc tggatattt  
99181 cgtcggcacc tacgacaccg ccgggatgct ccatgtgggg ctgtatgtgg gcaattcgg  
99241 gatgctgcac tgcggcgtac caatcagta cacgaacctt aattcaagct actggcaaca  
99301 gcattttat tgttacgggc gttacctt aacgccagaa aggagtgtt gactatggca  
99361 atgaacaaat tgaacgcat tgaaaaggac attgagaaaa ccaaggacaa gatcggcggc  
99421 ctgcaaaagc agcttcggga tctggaagcg gccaagacgg aacaggaaaa cttgagatt  
99481 gtccagcttg tgcgggacct gcacatgac cccaggaat ttgccctt tgtccggat  
99541 ggcgctgtc aggcacccc agccccgag ccgattttg agcaggacga acaggaggaa  
99601 accccgatg aagaataaag ccattcgcg gttcaccgca aactggccg ctgtgctttg  
99661 catggcggct gtttccgta ccgctacgc cggaggtgtt gaccctacc gcagccatt  
99721 gccggaggaa acggaaaaac ccaccaccg ggggatcgag atggagccgg aggacgtacc  
99781 cgtcacacc aagggaatg cggcgtggt gcatgattt ttcggggata agcagttgat  
99841 caccgtacc accaaggccg ggaattactt ctatatctt atcgaccggg ccaacgagga  
99901 caaggaaagc gcggtgcat tcttaacca agtgagcat gccgacctg aagcactgt

99961 gaaggacggc gagaccaagc cggaacactg tacctgcaca accaagtgtg aggccggggc  
100021 tgtcaatacg aattgcccg tgtgtaaaaa caacatgaac gcctgcaccg ggccggagcc  
100081 ggaagaacac aagccggagg aagccaagcc gcaggaggaa aagccaaacg gcataggcgg  
100141 ccttgtgggtg ttcttgccgg tcgttctggc aggcggcggc gcggctcttt acttctcaa  
100201 gttccgcaag ccaaaagcgg acatcaaggg cggcgacgat ctggacgagt acgactttgg  
100261 ggaggacgag gacgacgagg aagaagcccc ggagccagat gacaccaag agccggggga  
100321 agattggttg atcgagaaaag aagcacctga accaaacaag gaggatgagg aatgagtatt  
100381 cagttagtga ttgcagagaa accgagcgtg gcccgagca ttgcggcagt gattggagcg  
100441 gagaaaaaac aggacggcta cttagaggga aacggctatc tggtagctg gtgtatcggc  
100501 cacctggttt cccttgccga cgccggggcc tatgacgagc ggttcaaaaa atggcgctat  
100561 gacgacctgc cgattatccc gcagcagtgg cagtacatca tccggagca gaagaaaaag  
100621 cagtttgaaa tcttacgttc cctgatagag cgcaccgacg tggagagcct tgtgtgcgc  
100681 acagacgccg ggcgagaggg agaactcatt ttccgttcg tctaccagat ggcgggctgc  
100741 aaaaagccgt tcaaacgtct ttggatttcc agcatggagg acggggccat caaggacggc  
100801 tttgccatc taaaaccggg ggcagactac gacagcctgt atcagtcggc tcttgccgg  
100861 gcgagggcgg attggctggt ggggatcaac gccatcggc ttttctcat cctctaccac  
100921 aagacctga ccgtggggcg ggtgcagaca cccacctca aaatgctggt tgaccgggaa  
100981 agccaaatcg gcaatttcaa gaaagagaaa taccagttg tccatcgc ggcgggccc  
101041 atggaggcgg ccagcgaccg ctttacaagt cctgacgatg cggaggcggc taaggcggct  
101101 tgcgctgggg cacaggctgt ttgtttcc gtcaagcggg agcaaaaaac ggagaaaccg  
101161 ccccgctct atgacctac cacctgcag cgggaggcta accgctctt tggctttacc  
101221 gccaaagcaga ccctagacta tgcccagcag ctttatgaaa agaagcggct gacctatccg  
101281 agaacagaca gccagacct taccgacgat atgcagccca cagcggaaag cttgtgtcc  
101341 ggctctggc cgttctccc ctttgcaaag gggcttgacc tctcccgc gttgggccc  
101401 gtgctgaaca gcaaaaagg gagcgaccac cagccatca tcccacgat ggagttgtg  
101461 cagaaaggct ttgacgggct gaccgagggg gagaaaaaac ttctctcct tgtgtgctg  
101521 aagctcctgt gcgctggc cgcgctcat gtgttgagg ccgtaccgc cacttcacc  
101581 tgtgccggga aagagtttac cgccaagggc aaaaccatcc tgacgccggg ctggaaagag  
101641 attgacctcc gttccgtac ttgcttaag gccgatgcca acgagaacgc gccggagctg  
101701 gcgcggttac tgctgagat caccgagggc cagaccttg acaaggcggg gccagcatc  
101761 accgagcatt acaccgcgc cccgaagccc tacaccgagg acacgctact ttcggctatg  
101821 gaacgggccc gggccaagga tatgccggag gacgccgaac gccaaagttt gggaacccc  
101881 gccaccgcg cctccattct ggaaaagctg gtgcagatgg gctttgtgga acgaaaaggc  
101941 aagcagcttc tcccaccag ggacggccat aacctgcct cgtccttcc ggatgtgctg  
102001 acctctccc agcttacgtc tgaatgggaa acgaagctga cggccattgc caaaggtcag  
102061 gccgaccgg aggacttcat gcatgacatt gcagaaatga caaggagcct gattgtggc  
102121 tattcgaga tcagcgagga cgcacagaag ttgttcagg atgagcgtgt ggctatcggc  
102181 aaatgcccc gttgtgggga gagcgtctac gaggcaaga aaaactattc ctgcggaac  
102241 cgggctgccc agtttgcct gtggaagaat gaccgattt ttgaggaacg gggcaagcg  
102301 ttcacctga aaatcgccg cgtctgctg ggagacggaa aggcaaaggt aaaggactg  
102361 ctctctga aaaccggca gacctagac ggcacggtgc tttggccga tatcggcggc  
102421 aagtatgtga actaccgct ggaacagagg ggcaaaaact aaaaaacagc aagcataggg  
102481 agttagcca cactcccgt aaactcctg tccggccat tctgccggc gggaatttc  
102541 actttgggaa ggcttaatc ccctgtctc atgaacccc gttgtgctg aatggattca

102601 gatttgcttt tcaacatcgg gtatccctgc tataatatgc gcaaggagta tgtcatgcaa  
102661 aagaggaacc gatgaaacaa ccggataaaa aatcacgttt gaatggtatg gctgcgattg  
102721 ggatggggct tggcctgatt tttggaattt tgttgaagga cctcccgtg ggcctttga  
102781 tgggagcggc actggctggc tttgaaata tgacaacgaa aaggtaggcg gatggttatg  
102841 aaaaaatgga tacttattt tagcgcaatc gcattgcttt tgttttact gacctttgtt  
102901 ctatgtagcc gggaaaataa tctggcagca ctgtccagac aaagcgggat tgacttaacg  
102961 atagggaaag ttgtttcca caaggatacg catggtggat tcatggaga tgggtttcc  
103021 tacacagtgg tacagtatcc cgatgattcc atcgggtgaa aatggaaga aagtgaaccc  
103081 tggcatacac ttccactcc cgaaaactta gatacttcc tataccagcc atacgatg  
103141 gaagtatcta taccgaaat acaggacgga tactattatt tttatgaccg ccattcggaa  
103201 agtaggaatc catatgatga ttccgagttg ttccaacgtt tttccttaa tttacctt  
103261 gcaatttatg atcaaagctc caatcaaata tatctcattg aatatgacac ataaaggtag  
103321 tcgatctgtt tgatttaag aacggcttag accaggagga acaatgtata cgaacagccg  
103381 ggagaacgaa gtccgtttgc tgaacgggtt atgggcagag cttccaacca tatgccccaa  
103441 atgccaccaa gcggaattag agcatctta taagaaagcg aaaaagagta atctggactg  
103501 gaagtgcctt gcctgaggag aaatttaccg caccataaac atgctgagtg agctgccgga  
103561 ttctaaat tctgtatggc ctggctctg caacctacgg ttgcgttta gttgtagcc  
103621 tgcaaccgga atgttgatg atgatgaaat ctgaaaggag ggctgaaca tggcactgag  
103681 cgaaaacatt aaagccaggc gtacacaact aaaaatgtcc caagagtatg ttgccgatca  
103741 gttgggcatc agccgtcaag ctgttgcaaa gtgggaagca ggaaccagtg aaccgatc  
103801 taaaaactta tcggaactgg ctctctctt tgaatgagc atttctgaat tggttgatcc  
103861 tcaaacctat gccgaggaac aagagacgca ggaacaaaaa ttaagtacta agcagcgaaa  
103921 tgccaagatg cttttggca ggtggggggc tgtcactctg atgaatgctg gctgggacgg  
103981 ctattcttcc ggtctgtatg gtacagactt cccgtactat tggtagcca tttggcgg  
104041 tggcttga ttgctgtta tcacatcaaa ggatatgggg aaaaagcata ggcttgaagc  
104101 attgcagatt atacttggtc ttccatgat tttctctgtt ttcttttgc cgcgcatcat  
104161 tcctttggag caggttgag tgacgtatct tctggcagat gtgattactg caatctgagc  
104221 gattctatta agtttgaat attggcggca ttttgaag gttaaataaa acaaaggccg  
104281 tgtaggcccc tctattcac aactaaatac cagccgcca ccggcggcac aaccagcag  
104341 gaaatctttg aaacggttc ctgctttct tatgccattt ttaggaagg atgtgacacc  
104401 aaatgtctta tagctctat gaccatgacg atttagaacc ggccagcagc atgcggatcg  
104461 agcggcgat ttactttgaa agcggcaagg ccgatctctc cgaagcggta aagttgccc  
104521 ttgcggagct tcttctctg cgggcggaaa gcgcccgcg agaacaggaa gtgttgacc  
104581 gtttgaagc gcaggccgc gcattggaga aacaggccgg aagaaccctg tttctggaca  
104641 aagtcctgga atatgcccgg acgcttccc tcacgcacac ttcaaccag tgggagcagc  
104701 cggacaacta ccggcatatc cgcagcaaca tggttacca gatgtattac tccattcag  
104761 agaacacccc gtacgacagc gcccccaaa cctccgtccc ttactctgg acattaagct  
104821 ggagcctgag caccaacgag ccggcagct accggcaggc caagattgcc ggacaggatc  
104881 ggaaagtctt tgccagccgg gaagcactgg acaagtacct gaatggcctg atcaaggcac  
104941 acgcccatta cttacggaa atttcccgg ctatccctaa ggaatacggc gactattca  
105001 aggtcaacgg ctgtctgctc cccggctaca ccatcgaagg ggaggaaccg gcaaaagccg  
105061 cagagcttcc cacacaggag gaacctatgc agccccaac gttcaacacc acccggaac  
105121 ggagagcctc cgtgaacgaa gtatgttcca ttttcttga taaccagcc gaagcacaat  
105181 ccgacgaacc acatggctgc tggctttccc tgccaacgac cggcaacag gtgcaggccg

105241 ccttaaacga aatccatata accgccgaca accagcagga ttgtttcatt gccggtgttt  
105301 ctgccccgga ggggcatccg ctggaactgc cggaggactt gatacaatcc gccagtgtgg  
105361 acgaactgaa cttccttgcc gtgcagcttc aaaagttgga tgctgtggaa cggtcgcagt  
105421 taaacgccgt catgcagtcc ctggagaaat ttacagccat cgggcaggtc atcgactatt  
105481 acaaaatacc gattgcttta ttctcattga cgccaaagac taccgcacct taggggatta  
105541 ctacctgaat cttcgggcc tgatggtgat tcccgatgaa tggaaaccgg ccattgacac  
105601 ggaacggctg ggccagtta ttgccaggg ggaacaaggc acattaccg agtacgggta  
105661 tcttctgca accggggaca aatggcagcg cgtccatgag ggccagccag tgccggaaga  
105721 ataccgggtg atggcctatc ctgcccggga aattatgcgg gaggaagca aggtgcagcc  
105781 ggagacggca gctcccgaaggccccgca gcctgtcacc cccattctat taaacagtca  
105841 gaacagtacc gaccgatga aagaaatcac cgaccggctg gaaatcgga tacaggagct  
105901 gtttgagagt gaacgtaca aagcctatct cacctccata gcgaagtcc acagttacg  
105961 cttcaataac accctctga ttgctatgca ggggggcccag ctggtagcgg gctacaataa  
106021 gtggcgggac gagtttcacc gcaatgtgaa gaaaggcga aaagccatca agatcctggc  
106081 cccggccccg ttcaaagca agaaggaagt gccgaagctg gacgccagg gcaaggtggt  
106141 gataggccag gatggaaagc cagtcaccga ggtacaggaa atccaagttc cggcctcaa  
106201 aatcgtgtcc gtctttgatg taagccagac cgagggcggg ccgctgcct ctatcggcat  
106261 ggaagaactg accggcagcg tggaacgta cgaggaattt ttcaaggcgc tggaacagac  
106321 ctccccgtc ccgatgtct ttgaggacat cccggcggc tcccacggct actaccactt  
106381 ggcagaacag cggatcgcca ttcaggaggg catgagcga ttacagacc taaagacggc  
106441 catccatgag atcgccatt ccaagctcca cgccatgac ccggaagccc tggccataga  
106501 gcagggcagc cgccccgaca gccgcaccg cgaagtgcag gccgaaagcg tggcttatg  
106561 cgtttgcccag tactacggg tggtacctc cgattattc ttggctatg tggccggtg  
106621 gagttccggc aaggactga aagagctgaa agcctccctt gaaacctcc gggccaccg  
106681 ccatgaactg attaccacca ttgacggcca ccttgcccag cttcagaaag aacggcaggc  
106741 ccagcaggaa cagccgcaa ccgcaccgct ggaacaggcc gctgagcagc cagaccagg  
106801 cagtgcattt tccaagttg cccccagca acagcaggaa atgaccgaca gcgtaaaagc  
106861 catgctgcaa accctcattg aagcggattt aaaatccacc ggcgaggtat cacagggaac  
106921 caaggaggcg gcgcaggaac agggctttac cattgccggg gacggttcac tggaaaaggc  
106981 cgaggccccg caggaagccg cctaccgtct ggaaagcggc gattacctgt atatccagac  
107041 atcgaaaac gtttatgact acacgtata tggcctgac tacaaggagc tggacggagg  
107101 ccagcttgac aatcccagc tgtccctat ggaagctgga aaggaaatcc ttgctgcca  
107161 tgagctaccg gctgggacga tggaaccct gaccggcagc gcgctggacg gttttctgga  
107221 agccccaag caggccaacg ccattcccc gccgcaggca tggaaacgga tcgacggat  
107281 tttgaacggc aatccctga tgccggatgt atccccggct gaccgggagg ccgcccctgat  
107341 cgcgctggc gaacaaagc ccccgtttt gggaaggga gaacggaagt tgattatgga  
107401 ctatgccgac gccgtgaacg accgcaaaa aatcataggg ctgatcaacc acctatgta  
107461 acagggtgat gaactcaac acggcaagat ggatgacgtt gtaaaaagcc agattgtaag  
107521 tgatggcc gttgccagg cggaacagac catgcctgt gaccggaag ccgagccgat  
107581 tgtcacgatt cttggagtg aaagcccca cttaaagat ggccagcaaa tgccattaca  
107641 tgaggcagc gctgttttc agtactgga cgaggccaa cgccgaggc gagaacagcc  
107701 gggctatacg ggaagctggt acgacaagac caggtccgc attgactta ccatgcaggg  
107761 ccagccggac aactacgagg ggccgagga ctttggcgat ggggacggtt ccctgattca  
107821 gcatatccgg ggctgccag aatactacga acagatgaa agctggaaaa accatgtgct

107881 gcacatgag gggccggagg catgggaagc ggacaaggcc cagcgggata tgctgctgca  
107941 taccttgtc ccatatctca aacagcactg caacctttcc cgtatggaac aggaggccca  
108001 acaccttita cgatccggcg atccccgtt gccagagcag accgcctatt tggacgcctt  
108061 ggtggagtat gtaagagagt gccgtccgt tctcaatcag ggagaatcgt taccggagcc  
108121 gccgagcct ttcgacttg ataagagcct gcaggactat aaggcgcagg tcaagaccga  
108181 gctggaacag gaagccgcca ctgccgggct gacggtggag gaatatattg actctggttc  
108241 ctatgccccg gcgcagccta acttttccat ctaccaagtg ccgccccggc cggagggggc  
108301 cgacttccgc taccgttct atgaggactt gcaggcggac gggcttttg tggacaggaa  
108361 gaattaccag cttgtctaca ccgcgccgt ggataaggac accacactgg acgagattta  
108421 ccgccgttc aatatggaac atccccgca ttacaaggga cgttccctct ctatggggga  
108481 tattgtggtg ttccggcagg acggggaaca gacggcctac tatgtggacg agggggccga  
108541 ctaccggcag gtgccggagt tcttctcca gccggaaaag cagctcacgc cggacgagt  
108601 catgaccggc gaacaaatcc agacgccgag gggacgtttc tatctgaccg acaggagccc  
108661 ggaacagatg gagggtgcc ggtatggatt ccaccaccag tcggaggacg gcaagtatct  
108721 tattatggca aacggcaca gggcctttgc catccccggc cagcaggaca gccacatcaa  
108781 aaccgctgaa atgtccaccg agcagaacta caacatgatc gacggcatga tgaacaacgc  
108841 cccgtctatg gaggaactgg aagcaaaggc aaaagcaggg gaacagattt ccctttgga  
108901 tgtggccgag gcagccaagg cggaggccaa aaagccaag caaacgcga ggacaacaca  
108961 aaaaccaaaag aaaccgtcca tccggcgca gcttccgcc gccaaaggag aacagaaaaa  
109021 gaagtccccg gcgtgggaaa aatcaaaaga aatggaggtg tgaggaatgt atttaccgt  
109081 ggaagaagaa aacctgctct gtctgtatca taatgccgaa cgccgcagga cagcagcaaa  
109141 tctccggaca gttctgccg atatggaca ggaatggct acgctggcct gccagaccgc  
109201 cgataagctg gacgcatga gcgacgccga ctttgcggcg cagcggttcc acttcacaga  
109261 cgagtaagca aaacgccggg cgcgagggct atatggcct tgcgtccggc atttgtttg  
109321 cccagcatgg gcgttttcta atgggtgaaa gtccaagtg gcgtaggca acaacgaagc  
109381 acatagccga acagcaaggg gtccgccgt gagacggaat ctgaaagaag ctgtaagca  
109441 acctctgacc tgacggacag gaaccgata taaggctcgg aaatacggat aaggtggcaa  
109501 aaggcactga agtccaaaag gttgccggaa gtacgagtaa atgcggcagg tacatggagg  
109561 aaaagaacac gcacctaac tggggaggtc tcacaggcgg tctcattagc ctagtaaca  
109621 acgaattgtg agaagtcagc agaagccata gtagtgagga agttcctgta atggggacgg  
109681 agcgaagggc tgaacaatca atcagttgaa gtacgttcca cttcgtagcc ggagcatacg  
109741 cctgtcagat acttcaaagg cggcaaaagg aaaaggggca gaaaggaaac aacgcatgga  
109801 cacaagcagt ctatggagc agatattaag cagggataat ctaaagcgg cgtatctgca  
109861 agtcgtaagg aataaaggag cggcaggcgt ggacgggatg accgttgaag aactggcgc  
109921 atatcttctg gaaaacggcg aaaacattaa ggaacagttg cggacgagga agtataagcc  
109981 gaagccagtc cgcagggtgg agataccaa acccgatggt ggtacaagaa atcttgagt  
110041 gccaacagca gtagaccgct ttgtacagca ggcggtggca caggtgctta cccgatatt  
110101 tgaggagcag tttcacgacc acagctatgg attcagacc aagcgggtg cacagcaggc  
110161 agtccttaaa gcattggaaa tgatgaatga cggacacaac tggatagtgg atatcgacct  
110221 agcgaattc tttgacacag tagaccatga caagctgatg acgatttctg gacggacaat  
110281 aaaggacgga gatgtcatat cgggtgtaag aaagattctg gtcagcggcg taatgattga  
110341 tgatgagtat gaagatacgg tagtcggcac accgcagggt ggaaatatct cggcgtgtt  
110401 agcaaatatc atgttaaatg agctggacaa agaactggaa gcaaggaggc tggatttctg  
110461 ccggtatgca gatgacctta ttataatggt cgggagcaga caggcggcag agcgggtaat

110521 gaagagcgtg gctcggttta tagaggaaaa gcttggactg aaagtgaacg cggaaaagag  
110581 cagggttgat aaaccaaagg gcattaagta tctggggttt ggattttact atgactcatt  
110641 tgccaaaggg tacaagcca gaccacacc gaaagcggca gcaaagtca aggcgcagat  
110701 gaagaaatat acaagcagga gctggggagt gggcaatggt tataaaattg ggaaactca  
110761 ccggcttatac cgagggtgga taaattattt caaatcgga agcatgaaaa ggctgtgctg  
110821 aaaaatggac ggacagattc ggtatcgact gcgcatgtgc atatggaaac actggaaaac  
110881 gccaaagaac agggaaaaga atcttatcaa acttggctg cgcgcaaatg cggcacatgg  
110941 catttcatat gccaaaggat atgccagagt gtcagaagc tggaatctcc acatttgtat  
111001 cagtaaagag agactagcta agtttggctt tgtatccatg gaagactact acgccgaaa  
111061 ggctgttaca tgttaagttg attgaaccgc cgtataccga acggtacgta cgggtggtg  
111121 agaggtcggga aggcgaaata atgccttcc tctactcga ttatatggtc ttaaactgctg  
111181 aaatcatatc gcgaatattt tgaatcttt tggttttatc cgggttcaat cctctctca  
111241 caaaatctg taaattctga ttcgtaattt tttcagtatt agttttacct gtcattaca  
111301 aataaataac tctggtgaga gcataagttt cgtgaactat gccataagt ttaaaccct  
111361 cgacaaccag tgcaggatca ttaaataac ccttgaactc cgtattaacc gttgttagcg  
111421 tactatcagg aatttttaca agtccaaaat ctgaaagttt aactacaagg gtatcgtcgt  
111481 actcttttat caaatattt ttagggctta tatcacgatg cagatgtctt ttgaaatgaa  
111541 gataatcaaa agcgcgtaat atttgggg caattcctt tcgctgtata attgttaagg  
111601 tggagttatg agcagcgata tatccgtcca gtgtataatc catatattcc ataataact  
111661 cattttatc tggattgtag cagtaaactt caagtatgta tggagaagat agatcattca  
111721 ttacatcaaa ttctctttg aaacgggcca tttctttatc tgaagttcc tttttgcac  
111781 gctttaaataaaaaggccga ttataaaaag tgccttata ttataaaca ttagcataag  
111841 aaccgcttcc gatcagctt caatcaaatg taaaatctt tggcttatgt gaaatggta  
111901 tgctactaag aggtaaaaaa ataggaagt tataatataa ttcgacctt gccatattg  
111961 gcggtaatga actgcctcca cttgaactaa ggaaatctc acagcgtgta agtaactca  
112021 aatagtatgg gtctatttga aaggctaaag gcgttgctt tagtgaactt actaagctga  
112081 atataattc gattcttata attaaatctc tgctcggctc tgccaaaag tgtgcttcat  
112141 gttccccagt tggtagcctt tcgttcattg ttctaaaaag tccaaccaga tcatgatgta  
112201 aggtcataag tatttccga agttttgat ttctaatga ttatataaa tcggagtatt  
112261 ccacattat ttgactacat gataataatt ctctgtactg tgattcaata tagtttcaa  
112321 tattcataca agttccaccg tttcccgctt tgtttactg tattatatca tgcaattaca  
112381 taatcggcaa ttatcaaaa cgcggggcgc ggggtgtat tgcctctgcg tccggcatt  
112441 cttggtgctg cggcgggcgc acgtttctaa ccggtgcaag tccggaatcc gcccggtggt  
112501 gggaaggata tagccgaagg caagggtgct catcgtgagg tggaaatctga aggaagctgg  
112561 atatggggaa catactaacc catgggcaaa tctctggtt gacgaacaga aatcacatca  
112621 ggcatgctg gaggtaagg ctgccaaca agtcgaagcc caataaccac acggaatcat  
112681 gtatggtaaa tgtggcagat agatggagag aaagaaactg gtggtaccg gggaggtctg  
112741 tgcggaatgt cctgaaaggg ataaccata tcgtgaggta gtgctgaacg tacagaagtc  
112801 agcagaggtc gtagtagtcg agagacgaag gaccgaatca acaggagtct ttagtacaac  
112861 cgggaaagga ggaagaaca ttgggtacag aaaacagaga tagctgtca caaagagaca  
112921 gcgcggaacg tgaagggtat gtgagagcgc accgttctt cgcgggata tggaaagaaa  
112981 gagacagtgc acagccggaa ctcttagaga agatactgaa taaggacaac ttaaagagag  
113041 cttttaagag agtaaaggcg aataaggag cgcgggaat cgacggaatg accgtagagg  
113101 aaacaggtga ctgcctaagg gaaaatcaaa aggaactgat agagagaatc aaaaggggaa



113161 aatacacccc cgaccagta agacgagtag agattcccaa gccagagga ggaatgcgaa  
113221 agctgggcat tcaaccgtg aaagaccgta tctccagca agccatagga cagcagtaa  
113281 tgccagtcta tgaggcgtg ttctcgaga acagctatgg gtatcggccg ggaagaagcg  
113341 ccagggacgc catttaaag gtaaaagagt atgcagaaca gggatacacc catgccgttg  
113401 cattggacct gtcgaaatac tttgatactc tgaaccaaga atgctatta aatatcctgc  
113461 gcagagatgt aaaggatgaa agggttatcc aatggataaa gagataccta aagagtggtg  
113521 tcatggaaaa cgggtagtc atggagacag aggaaggatc gccgcaagga ggaaatctat  
113581 ccccgctgct ggcaaatgtc tatctgaacg agttcgacca ggagtacgag aaacgaggag  
113641 tggctttgt acgttacgca gatgatatag tattgttagc taaaagtgag agagccgcaa  
113701 agagacttct ggaaacaagc acgaaatc tggaaggac gctgaaattg caggtgaacc  
113761 agaagaaaag ccgtgtagta agtgatttg caatccgaaa ttttaagttc ctggcttca  
113821 cattgggaaa gaacggaaag ggcatttatg tccgagttca tgggaagtca tggagaaaa  
113881 tgaagtcaaa actgaaagac cttagttccc gaaggctgtg tcagagcata cgccatcgt  
113941 tagaaaagat aaagggtgat atgcggggct ggctgaatta ttatggagta gcagatatga  
114001 agaaccgaat agagggactg aaccaatggc tatatcacag aatccgaatg tgtatatgga  
114061 aacaatggaa gaaaccgaaa acgaaggtaa agaacctgct gaaaatggga gtgccgaaag  
114121 aattggcatg gaaggcaggg aacagccgaa gaggctattg gttaccaca caaacgtag  
114181 cggtaaatat ggcaatgaca aaagaaagac tgataaacag aggctattat gatttagcca  
114241 cagcctatca gtccgtgac gtaaccgtt gaaaccgccg tgtaccgaac ggtatgcacg  
114301 gtggtgtgag aggacgggag ttaatcactc cctcctactc gattttgtcc atttccgc  
114361 atttagaacc ccgtttgcg gggaacagga taactttatc catctgcctg ctgtccatgc  
114421 ggaaaagccc ttgatttccg tgtatttta ccgtcctaaa tgcgtagaca ggaggtatct  
114481 tttccgctgg cgttccgct ctttcttgc gctacctgc accgcacaat ccgggcagta  
114541 tttggcccgg ttggagtgg gcgtaaaggc cgccccgag acggtgcagc gtttgatct  
114601 atccggcct ttggtgattt cggcgacag ggccgctcc agcggcagga cggccacctt  
114661 gaaccaccgg cacagcagcg aataggaaat actctgcaca cagacacatt cctccccatc  
114721 gtcagcagg aggcagttc cgttacagta gttcagcac tcatgggtga gctgcggg  
114781 cttgcggtat tgggggtaac tcattctcgg tatattcctc gttctcgtg aagctcctt  
114841 cccggcgtg tccgaaaaat gctgtccaca ttctgttga caatgccgta ttcttcaat  
114901 tttgtttcg cttcgtgta ttgtcggac agccgttccc gttctcgtc cagctttta  
114961 tactcgttt tgagggcgtg caggttgggg agctttgtga tccagctc tttgagcgc  
115021 tttgcccg cctatacaa tatcagttgg cttcatgct gccgctggaa cgcggcctg  
115081 tcttgacat ttcgagttc cagcaccaca ggccggagct gctttaggc ggagaggtt  
115141 tttatcagca gcgccatc ccaaggcgg cgttctcgt cttcagggc ggaggccgc  
115201 gcgtgccca ccgctgat ctggccagc ctgcttcca agccctcgt gctgtcaat  
115261 tgggttccg tgatgaagt taaggagtg gcggcctgt tcaagtttg cagcttccg  
115321 caccgcat agcccgcga ctgctggcc ttgatactgt cctcaaggc gatccgag  
115381 gagatttccc cggcgttct tctgcggc cctcggcga tggcaatgcc cttgattgc  
115441 tgggtgatcc gttctcgtt gtaatcctc ccaaggct tgcagcggg gaagcgttcc  
115501 tgtccgggg cgcggaatga aataaactg ccctgttga cttcatagcc ctgctcctc  
115561 atgagctga aaaagctgc aaaatcttg gactcggga tggccgctc gatagcaatt  
115621 ttagtttg ctttcagct cttgccctt ttctgtcgt cccactcgc ataggtctg  
115681 ccctgtcct tgccggcctt taccacagc agccgtgtt cttgcacag ccggtcgtg  
115741 gtgcgccga taaaggcgt gctctgacgg ttgaaatgt acttgcgtg gttcccata

115801 tccacggcgc agataatgat gtggttatgc aggtggcct tgtcaatgtg ggtgtaatc  
115861 acataggggt attgccttg cagcacttca tcggcaagct gccgccgat ctctgggcc  
115921 tgctccgccc tggttcccc cggttcaaag gcttgatca ggtgatgtgc cagattgtt  
115981 cccttttgg acgctgatc cagcagcatt tgaattcta tatccgccgt tcataggaa  
116041 cagccatagg aagaaacgaa cagctttca tcggcttgt cgggttctc gatgtagtc  
116101 agcgccttt tcagcgtga ctgatagga tggatcttg taactgcat atcttgcca  
116161 gcgcccctt gatgtctcc aagtctgcg cgtacacagt cccgtactg ttgatacgc  
116221 ttgcaatctg gttgatgtg acgccgattt ttgcagctc tgcggtctgc gccggacgg  
116281 ggccgggtgc gatatggacg atatagccgt cgatcaacat tttccggcg taggcagaaa  
116341 agttcttgt gccaaactgg gccatcttct gttgatcag cggcgttcc tccggcgtca  
116401 ctgggacgcg cagcaciaat ttccgtttc gtttgccat tggttcacct ccgttcatt  
116461 aggggtttgg ggacttccc aagatacaaa cgggaagccg ttgcccggga gtgtggctac  
116521 actccctatg ctgtctgtt ttcttttct cactcctaa tactctgaga agccatcaaa  
116581 ctaccgcaa aatagcgtt tggaaagaaa aatttgcaa aaaataagag gccttggcc  
116641 tccatacaac aatgataaa caaatgccga atccgttga cgcgttcgt tgacggtccg  
116701 tgtctacagc acatcgttaa acttaccgt tctttgtt taccttgca gagaatcgg  
116761 tataaaagat tctgtcata tactttcata ctatcaattt agaagagga aaacacgat  
116821 aaacaaaatt acaatgaaat ctgcccggag taccgatct acttgaccga acatgaaaa  
116881 tctcacgcaa ccatacaaaa gtatgttctg gaggttgtt ggtttctt atttttacg  
116941 ggggaagaac ctacaaaagc aaaggtgctg gaatatcgag agcaactgca acagagccac  
117001 catgcccgca ccgtaaagc caagctgtcc gccattcatt cctatctgga ctactgggg  
117061 ctggcggcct gcaaggtgag gttttgaaa atccagcata cggatattgt ggatgacagc  
117121 cgagatttga ccgaagcgg ataccaccgc ttgttagacg ctgcaaaaag gaaaaaggac  
117181 agccgctgt atcatgtgat gcttgccatt tgcaccaccg gaatccgggt cagttagctt  
117241 tcctttctga ctgtggaggc attgcacaaa ggaaaagcgg aatccgcat gaaaggcaaa  
117301 atccgacca ttctctgac aaaagagctg tcccggaaat tgaacgcta tgccaaagaa  
117361 aaaggcatcc gaacggggta tctgtctgc accgtaccg gaaagccctt agatcgaagc  
117421 aatatctgac atgatatgaa aaagctgtgc cggcggcgc gggtaaatcc tgaagagtc  
117481 tttcccaca attgcccga ctgtttgca aatgctatt atgcatcaa aaagaatctg  
117541 gcatacttg cggatattt aggacaccc tccgtggaca ccacgcgat ctatgtagct  
117601 atgggcacac gggaacatga gcgaacctta cagcggatgc atctgatctc atagcaccac  
117661 ggaataatga ttctgtggtt ccatggcccc ctgtctcagt tacaagtaga actgattagc  
117721 tctattataa gtgtatcaga gcagattttc aaccattat tacatataga acagcaaaat  
117781 aaatacgaaa aatagacctg caccgcgaaa tatgtgcga ggtctgctt ttatgcctgt  
117841 cagaacgccc ttagttgatt aaaataataa ttttcttct agaagcagta acgattacc  
117901 cagaatcatt attctgcgg aattgaatcg tcagaaaag gaaagttgt ggttaggata  
117961 ttcccttga aatggcagga ggtgaataaa gtggaagaaa gatggctggg agaattgtg  
118021 gagtcttgg ccagaaggc cggatgtggg tatctgtcgg attgcccga tctagccca  
118081 tgggagcaat tccatctgtc caggagctt ttacatgtt cttcggagc ctttctgta  
118141 aaaactgga atgacgcctt ggcttatctg acgggtctt cccagcaagc ggatgatcc  
118201 gcccgaaaag aaactgtgat gaagcatcta tcggaacact gcagcgggtt gcaactcat  
118261 ccgagccgag aatgaattg aatagaaagg tggtagaat gctatgcaaa ttactgtgt  
118321 aggcgcaggt tatgtgggt tatctctgac cactctgta ggccaaaagc atgaagtaat  
118381 agtcttcat attgatgaag aaaaggtgc gaaagtaat tccgtatt ctcccgtca

118441 ggacgtatat ctgaaaagt ttttgccga aagaaaacta aattgacag cactgtaga  
118501 tacggcaata gcatataaag acgccgagta tgtaattatt acaacaccta ctaattatga  
118561 ggatgaaacc aatagctttg atactcatgc ggttgattcc accatagaaa tttgatggc  
118621 aaataatgat cattgcatta tgatcatcaa aagtacgggt cctgttgggt atacaaggag  
118681 tgtgcgaaaa aaatataaca ccagccacat tctatttcc cctgaatfff taagagaaac  
118741 gaaagcccta tacgacaatt tgtacccttc cagaattggt gttggtacag atattgcaga  
118801 cctgctatg gttatccatg cacaggtttt ttcaaccatc ttgcaagagt gcgcaaataa  
118861 agaagatatt cccgtcttga ttatagggtc tgatgaagca gaagccgcta aacttttcgc  
118921 taatacttat ttagccatgc gtgtgcggt ctttaacgaa ttggatacct ttgcagaaat  
118981 gaatgggta agtacaaga acatcataga tgcaattgt catgatcctc gaattggtaa  
119041 gcattataac aatccatctt ttggctatgg tggatattgc ctcccgaag atacaagca  
119101 gttgaaatca agttttcatg atattcctga aaatttgatt accgctgtgt gtcaggcaaa  
119161 ccacacaaa aaaggccatg tcataaaggg aattctgaat aaacatcctg gcacagtgg  
119221 tattaccgc ttaacggcaa agtctaattc tgacaatttc cgttcaagtg ctgtttggg  
119281 tgttatggag gggctttcca aagaaaaaca agaaattgta atatatgaac cttattagg  
119341 cgatgccgca gagtttatgg gttataaggt tgtacattct ttgicggagt ttaagcgttc  
119401 atgtgatgtt attgttgcta atagagtttc cagtgaactc tcggaagta tgtataaggt  
119461 ttatacaaga gacatcttg gaagagattg accggcgag gcggtgattg taatgtacac  
119521 attttcttg atggctgagg attatatcaa aactcataac cttcacctc ttatgtttt  
119581 cttgcattc atttcattc gatggggaat agtattttc catgctattc gatataagcc  
119641 atatgattat gaagataaag aaataaatta tttacatcg gtgctgctcc cagtcgttga  
119701 cgaaccatta gatctatfff atagtgttct gatgaaaata gcacgccaga atccgtctga  
119761 gattatagtt gtcattaatg ggccaaaaaa cgaggggctt gaaaacctgt gtgtagatt  
119821 caacaggaat ttaccaattt gctttactcc tgttcagcat tattatacac ctgttgccgg  
119881 taagagaaat gggatccgtg tggcaatgga gcacattaat ccgaattccg atataacagt  
119941 gcttgtggat agtgatacgg tatggacaga ggatactttg tccgagttgc tgaagcctt  
120001 tgcttggat caaaaaattg gcggtgttac aaccagacag aaaatacttg atcctgaccg  
120061 caaactcgtg accatgtttg caaattgct tgaagagatc agagctgaag gaacgatgaa  
120121 agcaatgagc gttacaggca aagtgggctg cttcccggc aggacaattg cttccgtac  
120181 tcagatfff atagatgta tgtatgactt tatgaatgag acattcatgg gatttcaaa  
120241 agaagatcc gatgacagaa gcctcaaaa cctgacgctc cgaaggggt acaaaacagt  
120301 tatgcaagac acctcagtaa ttatacaga tgcgccacc gaatggaaaa aatttatcag  
120361 gcagcagta agatggcgg aaggttcaca gtataacaat ctgagaatga ctcttggat  
120421 gttaaaaaac gccaaactga tgtgctttat ttactggtca gatatgatta gtccgatgat  
120481 gctggtagc gtttatgcca atactataat ttgcaagggt taaatatac ttggctgcgc  
120541 gattccaaca ttggcatata ccgctcatg gtggcagatc attctctta ttcttctgg  
120601 ttgatcatt agttttggt cacgaaatat taaggttatg agaagtgtga agtggtatta  
120661 tacattactg cttcagat tcatcctgt ttaactgtt gcatggttc ctatccgatt  
120721 gctaggcctt atgctctgct ctgacgat ggaatggggc acccgaaat tggaggagga  
120781 caatgataaa gtggaagttc ctaattgca tttgatatt cgcggctgct atatttat  
120841 tatgggtgg ttgcaacgaa cagcctgtc ataccgagaa ggccgatggc tctgacagca  
120901 ttgctctat tgaggctccg agtaatagtc aagctacact ggaagaacca actacggaat  
120961 ctattgtaac agaactccta gttgtcagat ctgaatatta tcctattaca gagggacaaa  
121021 gatatttggg cgtttatgtt caagggcccg aagagactga tgttttagct gacagcatca

121081 atactttagc ttggtttgat cgtttgatc agacaagtga ttacaagatt tctttatgtt  
121141 tagacgacaa taaatatata gcgtttatca ctttgacgcc taccgactgg gacttaaaat  
121201 tggtttctga cgggtattat gatgatttaa ttattgaata ttttaagaaa ctctcttcgg  
121261 ataacagagc caatacagaa cttttgttc gattagcgca tgaaatggaa atgaggcctt  
121321 cttacaaatc tggttgtac agttggcaaa cagatgatgc tcacgcatat gtaaagcctt  
121381 gggttcacat tgtgaacttg ggtaggaat atgctccaa tgtaagtgg gtatggctc  
121441 ccaacagggc agacgaatac acaacgaaat attatccagg tgatgagtat gttgattatg  
121501 tcggattgac attgaataac acattggatt cccgtgagag ttttcagcaa ttctatgaaa  
121561 atgaagtca aagagactat ttggaagcat ataataagcc aattatttt ggagagatcg  
121621 cggagcatag caccagtgat gaagttcgca atgaatacat acaatctgtt ttgattatc  
121681 ttggaaccta cgataaatgc atcggtttta tttcttaaa tcaagatata gaaagtgcaa  
121741 gacaatacaa gtttacagat tgcgaattga tattagatac atttattgag aatgcgaggg  
121801 attacattg tgcgaaataa gaagtttaca aagtatcaga tcatgacgag agttggaacg  
121861 attatcagca ttttactgtt tgttgcctt ggattttgta tcgaagttat tttctaaaaa  
121921 aatggagaaa gtgaaagatg gaacatcaaa ccaaaggaac gttgcgcaat caggccgtca  
121981 ttacatcagc cggatcgccc cga

//

DEFINITION Integrative and mobilisable element IME\_2

fasta\_record 1..9797

/ID=B77|SC|contig000001

/colour=5

CDS 969..1193

/color=7

/locus\_tag="B77\_00649"

/note="transcriptional repressor DicA

Helix-turn-helix, protein motif:CLUSTERS:PRK09706 protein

motif:TIGRFAMs:TIGR03070 protein motif: Pfam:PF01381.16"

/product="transcriptional repressor DicA

Helix-turn-helix [transcriptional regulator]"

/"ID=B77\_00649

/protein\_id="gnl|SC|B77\_00649""

/gene="dicA"

/codon\_start=1

CDS 1433..1858

/ID=B77\_00650

/color=1

/locus\_tag="B77\_00650"

/note="hypothetical protein"

/product="hypothetical protein"

/protein\_id="gnl|SC|B77\_00650"

/codon\_start=1

CDS complement(1807..2673)

/color=2

/locus\_tag="B77\_00651"

/eC\_number=2.7.7.-  
 /note="Aminoglycoside 6-adenylyltransferase Streptomycin  
 adenylyltransferase, similar to AA  
 sequence:UniProtKB:P17585 protein motif: Pfam:PF04439.6"  
 /product="Aminoglycoside 6-adenylyltransferase  
 Streptomycin adenylyltransferase [antibiotic  
 resistance]"  
 /"ID=B77\_00651  
 /gene="aadK""  
 /protein\_id="gnl|SC|B77\_00651"  
 /codon\_start=1  
 CDS complement(2847..3362)  
 /ID=B77\_00652  
 /color=1  
 /locus\_tag="B77\_00652"  
 /note="hypothetical protein"  
 /product="hypothetical protein"  
 /protein\_id="gnl|SC|B77\_00652"  
 /codon\_start=1  
 CDS complement(3399..4199)  
 /color=7  
 /locus\_tag="B77\_00653"  
 /note="HTH-type transcriptional regulator immR, similar  
 to AA sequence:UniProtKB:P96631 protein  
 motif:Cdd:COG1426 protein motif: Pfam:PF12844.1"  
 /product="HTH-type transcriptional regulator immR  
 [transcriptional regulator]"  
 /"ID=B77\_00653  
 /gene="immR""  
 /protein\_id="gnl|SC|B77\_00653"  
 /codon\_start=1  
 CDS complement(4266..4742)  
 /color=8  
 /locus\_tag="B77\_00654"  
 /note="Pyridoxamine 5'-phosphate oxidase, protein  
 motif:Cdd:COG3467 protein motif: Pfam:PF12900.1"  
 /product="Pyridoxamine 5'-phosphate oxidase [oxidase]"  
 /"ID=B77\_00654  
 /protein\_id="gnl|SC|B77\_00654""  
 /codon\_start=1  
 CDS 5120..5533  
 /ID=B77\_00655  
 /color=4  
 /locus\_tag="B77\_00655"

```

        /note="Conjugal transfer protein Cysteine-rich VLP
        containing protein"
        /product="Conjugal transfer protein Cysteine-rich VLP
        containing protein"
        /protein_id="gnl|SC|B77_00655"
        /codon_start=1
CDS     6223..7167
        /color=9
        /locus_tag="B77_00656"
        /note="Plasmid recombination enzyme Mob_pre, protein
        motif: Pfam:PF01076.13"
        /product="Plasmid recombination enzyme Mob_pre"
        /"ID=B77_00656
        /protein_id="gnl|SC|B77_00656""
        /codon_start=1
CDS     7240..7434
        /ID=B77_00657
        /color=1
        /locus_tag="B77_00657"
        /note="hypothetical protein"
        /product="hypothetical protein"
        /protein_id="gnl|SC|B77_00657"
        /codon_start=1
CDS     7535..9157
        /color=9
        /locus_tag="B77_00658"
        /note="Serine recombinase, protein motif: Pfam:PF07508.7"
        /product="Serine recombinase [recombinase]"
        /"ID=B77_00658
        /protein_id="gnl|SC|B77_00658""
        /codon_start=1
CDS     9273..9797
        /ID=B77_00659
        /color=7
        /locus_tag="B77_00659"
        /note="HTH-type transcriptional regulator immR"
        /product="HTH-type transcriptional regulator immR
        [transcriptional regulator]"
        /protein_id="gnl|SC|B77_00659"
        /gene="immR"
        /codon_start=1
BASE COUNT  2852 a 2117 c 2311 g 2517 t
ORIGIN
      1 caaccgtcag ttaaaggcaa aacggccata caaagatacg atttttcgaa tgttgatca

```

61 tgataagaa aatctgctat cattgtataa tgcagaagat ttgcagattg tcacattaga  
121 aaatgcaatt tatatgggaa tgaaaaatga tctggcgttt attatggata tgaattata  
181 tttgtatgag caccagtcca cgtataaccc gaattatccg cttagaaatt tattctatat  
241 tgcggatgaa tatcaagat tagtagttcg gaaatcttta tattccacgg taatacaaaa  
301 gataccgaca ccaagattta ttgtatttta taatggaacg aaaaaggtag acgattataa  
361 tgaattccga ttatcttcag cttatgagaa tccgatggat gatccggatc tggaattaa  
421 ggtgactatg ttgaatgtaa atgatggta taacctagaa ctgatggaac actgcagaac  
481 attaaaggaa tatgccaat atgttgcgag ggtaagaaaa tatgtgacgc agaattatcc  
541 tctggaagag gcagttacgc gagcggtaga tgaatgata gaggaaggaa ttctggcaga  
601 atttttggtg aagaataagg cagaggtgat caaagtgagc atctatgagt atgataaaga  
661 attgaagag aaaaaattac ggaaaacgga gtatgaagct ggtgtggagg ctggagtaga  
721 agctggaatt gaactggag aacggagtct tctgaaaaat cagattagaa agaagttgaa  
781 aaaaggaaag tctatagaac aaattgcgga tgaattggaa gaagaagtaa ctacaattca  
841 acgaattata gaagaaataa aaaaagaaaa ataagtatat gatcaggaag gctgttgcgt  
901 ctgcaatagt cttctttac gattcagagc tttttacctt aaaattcaaa aagtaaagga  
961 ttcgtcgatt gacgtattta acaaaaaatg tatatgatgt aattaaaca agaagttcat  
1021 tccgcttcaa agagtggaaa aaggaagtga attacatgga tgcaaaagta tttggaaaat  
1081 ttatcatgga gcggagaaag cagctgggta tgacacaggc ggaattagca ggaaagataa  
1141 atgtaacgga taaggcggc agcaggtggg aaagaggggg ttcacttaga taaagatacc  
1201 acaccaatcc cacgctgact tttgctcaac caatacagcc ggagggctgg ataacaagaa  
1261 aaggcggat gcgccccgtg gaggggtagc atatgcctt ttctgtggg ggtttccaaa  
1321 gggggcaacg cccccattg gcacacgact ttgcgaagca aagtgtagtg tttatagc  
1381 tctgtcggcg ttgtcgtgaa aatgccgtt cgcggggga gggcaagggc attgaagcg  
1441 gcaagattg aagcggcaag aaaacagggc tgtgcttgcg tggcgtggag ccgcaagcgc  
1501 aggtctggtt tcatcagcag acagggcgta tatgaaagcc cccgtccctc gtctacgct  
1561 ccgacttgtg gacaaagtgt cccgaagtgt tggccacact cccgaaaaag tagcaggaca  
1621 gcgggcaacc gtcaaggctg aatgaacgg ggttacacc gcccttgacc gcccccgc  
1681 gccccgctgg atgggtggac aaggcggcca atccctcaaa gtgcttggcc gcgctcttc  
1741 tgatttgag gtattcagtt tttcaaaatt gaataatcaa aataaattt ttcgattgaa  
1801 aaaatttat ttgtatcat cttcaatgcc atatttttc tttgcccga tcacataatt  
1861 actgatttt tcatcatata gtggatactg gtaatcaac tggcatgcca cttctgacga  
1921 aacctccgg aacaatgcca tacattgtt aaaggattcc cacatatggg gataggaatc  
1981 catattataa gtggacataa gtcgttcca caattcctt gggacatatt gttcataaa  
2041 tttatagttt tttccaaac tgaaatgaaa tcctgtttg ataccaatca gccaggaat  
2101 catgcaagc aattctttc gtactatc attcatatgg tcaatagcaa aaagaattc  
2161 tttgcggcat aagccctta ctacatagt ttagtattc caaattcat tacagcaatc  
2221 gtcaaacatt ctttgagtag gcttctgcaa gtggtagtct atatccgtt gtattggcgg  
2281 ctttacgata cggttgtct tatccaacag taacttacc agtttatccc atgtaaaata  
2341 ctcgtctatc agttccagcg gcagcaaagt taaatctatc ttaacatcat cagtaaacg  
2401 cattaatat gaaaatccct tttctacagc tggaaataat tccatatctt cggcctttg  
2461 cagaatcaac ctttccaa atatatctag ccattatca tcaactgtga agctgtccat  
2521 atccgtaaca aaaaaagtaa tatcaaaatc ctgaaatca tcaggcggaa tattgtatt  
2581 tgttctagat cttccaaag taacctgagc aatgcgtttg tctgttttg caaaattca  
2641 aacaatatca taaacttct tttctgatct cattttatc tctccaatt attgaaatg

2701 gtgtgaagcc attttagggc tttccgcct tgattaccct ttagcaaaga cgggcgggac  
2761 tgtcaacggc ggcgcatgaa atgcgccgtt catcttgacc gtgactggc tggctggct  
2821 ttgctatfff ctcgatgaaa aacaatffat tctgattfat ttccatcatt gtcatagtaa  
2881 gccacatgaa tggaaatact tttttctggg ttttaattg agataatata catatcatct  
2941 gtgttgatc tcaatgatc ttgcactgt ccatffatg tataagtgat ttcagcatac  
3001 tctgttttag caccattaaa ccaaattaaa tcataccatt ctccgtttat tgcaacgcca  
3061 ccgacaataa tctcatcact atttcggttt gtgatgtac taaattgta gtctccatt  
3121 cctgttgggt caaagatagc aagtgtagat ttattatctg tactgtatgc tccactcacg  
3181 atataaccgc caagtccag ttctttgcg atagtccatt cattcccttt tgaattgcg  
3241 gtgttcaata tgctttctct gctggtaatg gtatctcttt tgggagttaa actaaagaaa  
3301 tataaaaaag cggcagcaac gcaaataaca gtcgctgaaa ttatcagtaa cactttttc  
3361 ataaccaata cctccatata atctgattta ttattctctt acttgcgtcc ccgctgccc  
3421 tttggatttt tcagcaaatc cgatttctgt gcaatctttt tcaaccattt cttttcttc  
3481 tctgacagtt tcccatagtt cagcttgagc cgcttacaga taaatgcat agccgctgc  
3541 tccgggtcgc tgtctctct ggtggtttcc tctgcggtct gcaaaaaatc ttccagagga  
3601 ttgtctccg ggacgtgaa aaaatcgtcc ttgtgggctt cccgaggtc aagggtatc  
3661 ttgtttatat cctgctgtaa cacatagcgg caaaagctgt catcgtcaat gtggcgggc  
3721 atcagctgcc ttaactcggg gtcggtcaga ccgggattgt gctgctcat aatggttgc  
3781 ctcacagcgt ccacaatggc gtttcccc tgacactgtt tgccagcat accgtttaca  
3841 tagatttcaa ggtcagccat caaccgaggg aaatccgggt gtgccgcccag ttcacacaag  
3901 agggcaattat ccaccagccc acttttcaat aattcaatca tttcatcact caaacgcagg  
3961 tcggcaagat cggcgtttgg gtgattttt gtgtgagagc ggcacagaag ataatcaac  
4021 gacacttcat aaaactcgc cagctggata agggcatagt ggctgatgac cttgaaattg  
4081 tccccctcat aactcccag cgcagactta gaaaggtggg tctgttccgc aagctgttc  
4141 agcgtcaagc cacgctctac acgcaggctt ttaaccgtt ctggtatgga taattccatg  
4201 cttccctctc cctcctgtc tgcccgataa atgggaagt gtcgctctaa atacaattct  
4261 tattgttatt tttctgtac ttttttcc gaaatagtt ctatttctat ttctatcaac  
4321 tgtacgctt taattccctt tctgatttct tctcaacct cctccgctga cggataatat  
4381 ttaagtcaa attttctac ttttcttc gtagtctac agtcttcaac tagccttgc  
4441 ctgcaaata ccacacagct tgaacatga taagccaat ctccatcctc tacatatcca  
4501 tcattccatg tctgaagca aactttgtcg ttatttataa tggaaatcaat cttatgtcct  
4561 tttttgccc tatgaaaata aattttattt tcattttcat catagtaaaa atttattggg  
4621 attgtataag gatattccc atctccgtt acggagaaag ccgctctctt attatttctc  
4681 acaaatctt ttgcttctc aatcgtatc tcttctta tctttctac ttttctaac  
4741 ataacaact ctctgcaaa taccgattta ccgttctgt tcttccattc taccacaatt  
4801 ccgagagcgt ggaaatagcc tgttttgaa gccaatttcc caccttccg atatacggga  
4861 cggcggtca ttaggtgta gacttagatt agttcatcga tggacagcac cttgaaaacc  
4921 aatgaccgt ccgaaaagga ataccctggc tggggaagca ccgcaaggag ccaacttctg  
4981 gacacttctg ccagaggta cttcgggaca agttgtccc aagttatggg gagcgtgcca  
5041 atgccggaac acgccgagg aatggggcag gaagcctttt cggggagaac ggcaacggaa  
5101 agcaactgg agggaacgca tgagagataa ccctataaa gacttcccgc cgctggaacg  
5161 caagccggac ggttcccttt accgcatgac accagcgcag cggaaacggg caagccccct  
5221 gatagccgg gcgtgctgta actgcgaagg cggcaactgc attgtcctg acgatgggga  
5281 cacctgcacc tgcccgcaga cggtttctt ctcggtctgc tgtaagtgtt tccgctgggc



5341 ggtcttgccg ctggacggaa cgctggaagc ggagatttc cgggataagg acttgaaacg  
5401 ctgtgtggtc tgtggcggta tgctgtccc caaatccaac cgggcaaaa actgccccg  
5461 ctgcgccgcc agagttcaca ggcggcagaa aacagaaagt gaacggaaaa ggaggtctgc  
5521 tgtggacagt taggagcggg aaaagccttg atttatcagg cttcgcaagc ccaaaccgg  
5581 ggaggtggt ataaagtatc gcctaccccg gaaaacaggc ttctaaccgt ccacaaaacg  
5641 cactatgaca aatacaatct atatcatca gccggaaaag gcgttcagct tcaccggct  
5701 cccgaatttc ctcttgaag cccccacatt caagcccctg tccaacgagg caaaggttct  
5761 gtacgcctt atctgcgcc ggacagagt atcccgaag aatgggtggg cggatgactg  
5821 cggacggatt ttctgtatt acccatctg cgaggtggtt gacctgttc actgtgggcg  
5881 gcagaaagcg gtgaacacc tcggggaact gcaatatgcc ggactggtgg agatccagaa  
5941 gcagggtgt ggaagccca accgcattta ccaaaatcc tatgaagcgg tttcaaacac  
6001 cgactcaag aaatccggtt atggtacgcc ggagggtcga aaaccgtacc catgaagtac  
6061 ggaaatcacc cgtgagaagt acggaaaccg gacgtatat agaaataca agattaaag  
6121 attgattag atctatcca ttcaatcct atccgagcta tttccggcg gatttcct  
6181 gtgaaaacc ccgatggga aaggaatggg gaaaggagt tcatggcaca acacgaatt  
6241 ttgcgttcg agaaacaca gggcaaccg gcaaggccg tggaaagcca tcacgaacgg  
6301 caaaaggaga agtatgccag caatcccgc attgacacca gccggagtaa atacaactc  
6361 catatcgtca aaccggaggg cagatactac cattcattc aaaaccgtat tgaacaggcg  
6421 ggttgccgca cccgaagga cagcaccgg tttgtggaca cgctgataac cgccagccc  
6481 gagttttca aggggaaatc ccaaaggag atacaggcgt tttccagcg ggcggcggac  
6541 tttctcatc ggcggtagg gcgtgaaaat atcgtgctcg cgggtgtaca catggacgag  
6601 aaaaccccc acctgattt gaccttgtt ccgtgacaa aggacaacc cctgtgcgt  
6661 aaagagatta tcggcaacc ggcaaactg acgaagtggc aggacgatt tcacgcctat  
6721 atggtggtga aatatccga cttggagcgt ggggagagt ccagcaagac aggccggaag  
6781 catatccca cccgctttt caaacaggcg gtttcctct ccaaacaggc cagagccatt  
6841 gaagccgcc ttgacggcat taaccgctg aacgccgga aaaaaaaga ggaagccctc  
6901 tccatgtaa aaaagtggt cccgagatg gagaacttct ccgggcagtt gaaaaagtac  
6961 aagtcacaa tcaatgacct gttggcggag aatgagaagt tggaaagca ggcaaagcc  
7021 agcgaaaaag gaaagatgaa agatacgtg gaacgggcaa agctgaaaag cgaactggac  
7081 aatttacagc ggtcgttga ccgatccc cggatatac tggcggaaact gaaacgtcag  
7141 cagcggcaca cggtaaagga aaggtgatag atataagcag aaatttcgc cgccttgtg  
7201 cggcattgta cttgaaaac tgaatatgga ggacactgga tggcaaaaag cgaagcgat  
7261 attttacgc cccggacagg gcaggtcata caaacagaga acggcacgca gtatttga  
7321 tgtgggaaca accgtataaa aatctccgaa cacttcgcc caggcgggaa gccctcgtt  
7381 gatctgatt tagatggtt gcggcatacc gcagaaaaag ccgctcaac ctgatagccc  
7441 atcattgata acacgccac gcttatgata taattgcat agagcaaaag tattgtaagc  
7501 gtgggttct tctttagaag gaggatttt aacggtgaaa caacctaca atactacgat  
7561 ttacaacac gcgcttata tgagattgag ccgggacgat gaaaactat gtgacagcgt  
7621 aagcattgaa acacagcga caatctgca acagtacgca aaggaacagg ggcttcatgt  
7681 agtcggtgag tatgtggac atggctggtc ggggacgaac tttgaacgcc cggatttca  
7741 gcgcatgat gacgatgtg aagctgaaa agtaactgc attgtcacga aagaccttc  
7801 ccgttcggg cgggaacatg tgatgatgga ctactatctg gaatttctgt tccggaaaa  
7861 acgggtgctc tacatgccg ttgcggagaa tgaggacaca gagaaagggc tttccgatt  
7921 tgtcccgttc aaaaacctg tcaatgaatg gtttcgaaa gatacaagcc gcaaggtaaa

7981 ggccgctttc aaagcaaagt ttgccacagg acagcgtatc ggcgctatg ctcccatcgg  
8041 gtacaggaaa cacccgaaa tcaaaaacaa gctgataatc gacgaggaaa cccgctggat  
8101 agtggagaag attttgacc ttgccattca tggcagaggg gcggccagta tcacaagaat  
8161 attgattcgc gaaaaggttc ctacgccggg atttatcaac ttccagcgtg acgggacttt  
8221 cgcaaacatc tatgcggtg cgccagagga aaaaagctac gcatggacga tagcgcaggt  
8281 caagagcatt atgaaagatg aaacctatat cggccatacc atccactacc gggaaacaaa  
8341 catttccttt agaacaagc gaaggatacg caaacccaa agtgaatggg tacgggtgga  
8401 gaatacgcag gagccgatta tcagcgaaca ggtttccgg caggtacagg agcagatagc  
8461 aaaccgccg agaaagtca aggatggtac gacgcagatt tttccgggc tggtaaaatg  
8521 tgcggattgc ggctggtcgc tgtcctatgg ggagaacagg cagaacagca agccttacgg  
8581 ccattatcat ttagcaagt acggacaggg cacacgcaa tgctcatgc attatatccg  
8641 ctatgatgtg ctttacgcct atgtcctc cgtctgcaa tactggtcgg ggctgtgata  
8701 gcatgatgaa gaacggcttt tgaagcggct gttaaatgcc aatgacaagg gacaggccgc  
8761 cgaggaaaag aagcaagccg cagagtgaa caaagcggag aagcggaaag ccgaagtcga  
8821 taccctgttt gcccgatgt atgaggactg ggcgcgggg cgtatcacgg aatacaactt  
8881 ctctatgctg tccgggaagt accagagcga acaggctgaa ctggacacaa agattgaaca  
8941 gttcaatcc gctatcgcca ctgaaagcca gaacgccga gacgcagaaa aatggattgc  
9001 cttgatgaaa gattgctca atccaacaga actgaccgcc gaactttga atacgctgat  
9061 tgaaaaaatc gttgtccatg aagcgtcaa aggtgaggac ggaagccggg aacaggaggt  
9121 agaaatctt taccgttta tcggcaaat cgaatgacac atcttgagat acccaacaat  
9181 atctttaat aagggaaact ggactgggct tcctgatat taatacactg gaacctctgt  
9241 cagatgcact cgagatagga gtggtggaac ttatgagatc ggaaatcaac acagaaaaaa  
9301 gagaagataa aataaatcaa gaatgtgtga ccgagattat gaaatcaaca gcagagatag  
9361 cggaatatca taaaatgaag aagatgaaat gttgatcgg cggaatttgc tttgtagtag  
9421 cagtgtcggg agtgatggtt acacagtcaa caaaagtgtt ttcttcgatt gtattttatg  
9481 cttgatcat aggatgtact acatgtgtgg ttcttttac gcagcattgg aaaattcgtg  
9541 aaaaaagaga atttatctt tcgcttatct gctgtctggg agcagccagt ctgatatgga  
9601 tgttccaggt gtttcgata aaagcaataa acagtatcat ggatgtggg agcattctta  
9661 tttgtattgt gattgattt acattttaa aagattttat tgaagtgtg attaagaaag  
9721 aatatctgca aatggcagtg tgtggaatat ttctcttc aacgacagta gaatatttc  
9781 ggattgtatt aaagtaa

//

DEFINITION Integrative and mobilisable element IME\_3

fasta\_record 1..30313

/ID=B77|SC|contig000001

/colour=5

CDS complement(163..783)

/color=8

/locus\_tag="B77\_03249"

/note="NUDIX hydrolase Hydrolase of X-linked nucleoside diphosphate N terminal, protein motif: Pfam:PF12535.2"

/product="NUDIX hydrolase Hydrolase of X-linked nucleoside diphosphate N terminal [hydrolase]"

/"ID=B77\_03249

```

/protein_id="gnl|SC|B77_03249""
/codon_start=1
CDS    complement(867..2033)
/color=8
/locus_tag="B77_03250"
/note="ABC transporter permease subunit, protein
motif:Cdd:COG1277 protein motif:Pfam:PF12730.1"
/product="ABC transporter permease subunit [transporter]"
/"ID=B77_03250
/protein_id="gnl|SC|B77_03250""
/codon_start=1
CDS    complement(2038..2904)
/color=8
/locus_tag="B77_03251"
/eC_number=3.6.3.-
/note="ABC transporter ATP-binding subunit, similar to AA
sequence:UniProtKB:P32010 protein motif:CLUSTERS:PRK13537
protein motif:Cdd:COG4555 protein motif:TIGRFAMs:TIGR03522
protein motif:Pfam:PF00005.21"
/product="ABC transporter ATP-binding subunit
[transporter]"
/"ID=B77_03251
/protein_id="gnl|SC|B77_03251""
/codon_start=1
CDS    complement(2895..3650)
/ID=B77_03252
/color=1
/locus_tag="B77_03252"
/note="hypothetical protein"
/product="hypothetical protein"
/protein_id="gnl|SC|B77_03252"
/codon_start=1
CDS    complement(3640..4194)
/color=7
/locus_tag="B77_03253"
/note="RNA polymerase sigma factor Sigma-70, similar to AA
sequence:UniProtKB:P0AGB6 protein motif:CLUSTERS:PRK12513
protein motif:TIGRFAMs:TIGR02937 protein
motif:Pfam:PF08281.6"
/product="RNA polymerase sigma factor Sigma-70
[transcriptional regulator]"
/"ID=B77_03253
/protein_id="gnl|SC|B77_03253""
/codon_start=1

```

CDS 4585..4893  
 /color=8  
 /locus\_tag="B77\_03254"  
 /note="Type II toxin-antitoxin system RelB/DinJ famil  
 antitoxin RelB , protein motif:TIGRFAMs:TIGR02384 protein  
 motif: Pfam:PF04221.6"  
 /product="Type II toxin-antitoxin system RelB/DinJ famil  
 antitoxin RelB [toxin-antitoxin]"  
 /"ID=B77\_03254  
 /protein\_id="gnl|SC|B77\_03254""  
 /gene="relB"  
 /codon\_start=1

CDS 4890..5219  
 /color=8  
 /locus\_tag="B77\_03255"  
 /note="=Type II toxin-antitoxin system RelE/StbE family  
 toxin RelE, protein motif:TIGRFAMs:TIGR02385 protein  
 motif: Pfam:PF05016.8"  
 /product="Type II toxin-antitoxin system RelE/StbE family  
 toxin RelE [toxin-antitoxin]"  
 /"ID=B77\_03255  
 /protein\_id="gnl|SC|B77\_03255""  
 /gene="relE"  
 /codon\_start=1

CDS 5401..6369  
 /ID=B77\_03256  
 /color=1  
 /locus\_tag="B77\_03256"  
 /note="hypothetical protein"  
 /product="hypothetical protein"  
 /protein\_id="gnl|SC|B77\_03256"  
 /codon\_start=1

CDS complement(6589..7320)  
 /ID=B77\_03257  
 /color=1  
 /locus\_tag="B77\_03257"  
 /note="hypothetical protein"  
 /product="hypothetical protein"  
 /protein\_id="gnl|SC|B77\_03257"  
 /codon\_start=1

CDS complement(7418..7699)  
 /ID=B77\_03258  
 /color=1  
 /locus\_tag="B77\_03258"

/note="hypothetical protein"  
/product="hypothetical protein"  
/protein\_id="gnl|SC|B77\_03258"  
/codon\_start=1  
CDS complement(7719..7916)  
/ID=B77\_03259  
/color=1  
/locus\_tag="B77\_03259"  
/note="hypothetical protein"  
/product="hypothetical protein"  
/protein\_id="gnl|SC|B77\_03259"  
/codon\_start=1  
CDS complement(7950..9152)  
/ID=B77\_03260  
/color=1  
/locus\_tag="B77\_03260"  
/note="hypothetical protein"  
/product="hypothetical protein"  
/protein\_id="gnl|SC|B77\_03260"  
/codon\_start=1  
CDS complement(9184..9342)  
/ID=B77\_03261  
/color=1  
/locus\_tag="B77\_03261"  
/note="hypothetical protein"  
/product="hypothetical protein"  
/protein\_id="gnl|SC|B77\_03261"  
/codon\_start=1  
CDS complement(9548..9961)  
/ID=B77\_03262  
/color=1  
/locus\_tag="B77\_03262"  
/note="hypothetical protein"  
/product="hypothetical protein"  
/protein\_id="gnl|SC|B77\_03262"  
/codon\_start=1  
CDS complement(10022..10246)  
/ID=B77\_03263  
/color=1  
/locus\_tag="B77\_03263"  
/note="hypothetical protein"  
/product="hypothetical protein"  
/protein\_id="gnl|SC|B77\_03263"  
/codon\_start=1

CDS complement(10604..11359)  
 /ID=B77\_03264  
 /color=1  
 /locus\_tag="B77\_03264"  
 /note="hypothetical protein"  
 /product="hypothetical protein"  
 /protein\_id="gnl|SC|B77\_03264"  
 /codon\_start=1

CDS 12774..13160  
 /color=4  
 /locus\_tag="B77\_03265"  
 /note="plasmid mobilisation relaxosome protein MobC,  
 protein motif:Pfam:PF05713.5"  
 /product="Plasmid mobilisation relaxosome protein MobC  
 [relaxosome]"  
 /ID=B77\_03265  
 /protein\_id="gnl|SC|B77\_03265""  
 /gene="mobC"  
 /codon\_start=1

CDS 13138..14691  
 /color=4  
 /locus\_tag="B77\_03266"  
 /note="Relaxase/Mobilisation nuclease domain, protein  
 motif:Pfam:PF03432.8"  
 /product="Relaxase/Mobilisation nuclease domain  
 [relaxase]"  
 /ID=B77\_03266  
 /protein\_id="gnl|SC|B77\_03266""  
 /codon\_start=1

CDS 14721..15047  
 /ID=B77\_03267  
 /color=1  
 /locus\_tag="B77\_03267"  
 /note="hypothetical protein"  
 /product="hypothetical protein"  
 /protein\_id="gnl|SC|B77\_03267"  
 /codon\_start=1

CDS 15034..15813  
 /color=8  
 /locus\_tag="B77\_03268"  
 /note="FAD-dependent thymidylate synthase, protein  
 motif:CLUSTERS:PRK00847 protein motif:TIGRFAMs:TIGR02170  
 protein motif:Pfam:PF02511.9"  
 /product="FAD-dependent thymidylate synthase

[methyltransferase]"  
 /"ID=B77\_03268  
 /protein\_id="gnl|SC|B77\_03268""  
 /codon\_start=1  
 CDS 15890..16216  
 /color=8  
 /locus\_tag="B77\_03269"  
 /eC\_number=3.6.1.23  
 /note="Deoxyuridine 5'-triphosphate nucleotidohydrolase,  
 similar to AA sequence:UniProtKB:Q2YRG4 protein  
 motif:CLUSTERS:PRK00601 protein motif:TIGRFAMs:TIGR00576  
 protein motif:Pfam:PF00692.13"  
 /product="Deoxyuridine 5'-triphosphate nucleotidohydrolase  
 [hydrolase]"  
 /"ID=B77\_03269  
 /protein\_id="gnl|SC|B77\_03269""  
 /gene="dut"  
 /codon\_start=1  
 CDS 16367..16492  
 /color=7  
 /locus\_tag="B77\_03270"  
 /note="helix-turn-helix transcriptional regulator, ab  
 initio prediction:Prodigal:2.60"  
 /product="helix-turn-helix transcriptional regulator  
 [transcriptional regulator]"  
 /"ID=B77\_03270  
 /protein\_id="gnl|SC|B77\_03270""  
 /codon\_start=1  
 CDS complement(16622..17050)  
 /ID=B77\_03271  
 /color=1  
 /locus\_tag="B77\_03271"  
 /note="hypothetical protein"  
 /product="hypothetical protein"  
 /protein\_id="gnl|SC|B77\_03271"  
 /codon\_start=1  
 CDS 17374..17748  
 /ID=B77\_03272  
 /color=9  
 /locus\_tag="B77\_03272"  
 /note="transposon-encoded protein TnpV"  
 /product="Transposon-encoded protein TnpV"  
 /protein\_id="gnl|SC|B77\_03272"  
 /gene="tnpV"

CDS        /codon\_start=1  
           18115..20034  
           /color=2  
           /locus\_tag="B77\_03273"  
           /note="tetracycline resistance protein tetM from  
           transposon Tn916, similar to AA sequence:UniProtKB:P21598  
           protein motif:CLUSTERS:PRK13351 protein motif:Cdd:COG0050  
           protein motif:TIGRFAMs:TIGR00484 protein  
           motif:Pfam:PF00009.21"  
           /product="Tetracycline resistance protein tetM from  
           transposon Tn916 [antibiotic resistance]"  
           /ID=B77\_03273  
           /protein\_id="gnl|SC|B77\_03273""  
           /gene="tetM"  
 CDS        /codon\_start=1  
           20752..21177  
           /color=7  
           /locus\_tag="B77\_03274"  
           /note="RNA polymerase sigma factor Sigma-70 , protein  
           motif:TIGRFAMs:TIGR02937"  
           /product="RNA polymerase sigma factor Sigma-70  
           [transcriptional regulator]"  
           /ID=B77\_03274  
           /protein\_id="gnl|SC|B77\_03274""  
 CDS        /codon\_start=1  
           21770..22114  
           /color=7  
           /locus\_tag="B77\_03275"  
           /note="ribbon-helix-helix protein CopG family, ab initio  
           prediction:Prodigal:2.60"  
           /product="Ribbon-helix-helix protein CopG family  
           [transcriptional regulator]"  
           /ID=B77\_03275  
           /protein\_id="gnl|SC|B77\_03275""  
 CDS        /codon\_start=1  
           22116..23471  
           /ID=B77\_03276  
           /color=4  
           /locus\_tag="B77\_03276"  
           /note="Relaxase/Mobilisation nuclease domain"  
           /product="Relaxase/Mobilisation nuclease domain  
           [relaxase]"  
           /protein\_id="gnl|SC|B77\_03276"  
           /codon\_start=1



CDS 23468..23758  
 /ID=B77\_03277  
 /color=9  
 /locus\_tag="B77\_03277"  
 /note="transposon-encoded protein TnpW"  
 /product="Transposon-encoded protein TnpW"  
 /protein\_id="gnl|SC|B77\_03277"  
 /gene="tnpW"  
 /codon\_start=1

CDS complement(24054..25727)  
 /color=9  
 /locus\_tag="B77\_03278"  
 /note="serine recombinas, protein motif:PFam:PF00239.15"  
 /product="Serine recombinase [recombinase]"  
 /ID=B77\_03278  
 /protein\_id="gnl|SC|B77\_03278"  
 /codon\_start=1

CDS complement(25805..25978)  
 /ID=B77\_03279  
 /color=9  
 /locus\_tag="B77\_03279"  
 /note="transposon-encoded protein TnpW"  
 /product="Transposon-encoded protein TnpW"  
 /protein\_id="gnl|SC|B77\_03279"  
 /gene="tnpW"  
 /codon\_start=1

CDS complement(26437..26679)  
 /color=7  
 /locus\_tag="B77\_03280"  
 /note="helix-turn-helix domain-containing protein, protein motif:PFam:PF12645.1"  
 /product="helix-turn-helix domain-containing protein [transcriptional regulator]"  
 /ID=B77\_03280  
 /protein\_id="gnl|SC|B77\_03280"  
 /codon\_start=1

CDS complement(26663..27100)  
 /color=7  
 /locus\_tag="B77\_03281"  
 /note="RNA polymerase sigma factor Sigma-70, protein motif:CLUSTERS:PRK11924 protein motif:TIGRFAMs:TIGR02937 protein motif:PFam:PF08281.6"  
 /product="RNA polymerase sigma factor Sigma-70 [transcriptional regulator]"

/"ID=B77\_03281  
 /protein\_id="gnl|SC|B77\_03281""  
 /codon\_start=1  
 CDS complement(27574..28557)  
 /color=8  
 /locus\_tag="B77\_03282"  
 /eC\_number=2.1.1.192  
 /note="R23S rRNA adenine 2503 methyltransferase RlmN,  
 similar to AA sequence:UniProtKB:Q7A600 protein  
 motif:CLUSTERS:PRK14469 protein motif:TIGRFAMs:TIGR00048  
 protein motif:Pfam:PF04055.15"  
 /product="R23S rRNA  
 %28adenine%282503%29-C%282%29%29-methyltransferase RlmN  
 [methyltransferase]"  
 /"ID=B77\_03282  
 /protein\_id="gnl|SC|B77\_03282""  
 /gene="rlmN"  
 /codon\_start=1  
 CDS complement(28574..28759)  
 /ID=B77\_03283  
 /color=4  
 /locus\_tag="B77\_03283"  
 /note="conjugal transfer protein Cysteine-rich KTR"  
 /product="Conjugal transfer protein Cysteine-rich KTR"  
 /protein\_id="gnl|SC|B77\_03283"  
 /codon\_start=1  
 CDS 29158..29514  
 /color=7  
 /locus\_tag="B77\_03284"  
 /note="anaerobic benzoate catabolism transcriptional  
 regulator helix-turn-helix transcriptional regulator,  
 protein motif:CLUSTERS:PRK08154 protein motif:Cdd:COG3800  
 protein motif:Pfam:PF12844.1"  
 /product="Anaerobic benzoate catabolism transcriptional  
 regulator helix-turn-helix transcriptional regulator  
 [transcriptional regulator]"  
 /"ID=B77\_03284  
 /protein\_id="gnl|SC|B77\_03284""  
 /codon\_start=1  
 CDS complement(29517..29708)  
 /ID=B77\_03285  
 /color=1  
 /locus\_tag="B77\_03285"  
 /note="hypothetical protein"

```

        /product="hypothetical protein"
        /protein_id="gnl|SC|B77_03285"
        /codon_start=1
CDS     complement(29737..29934)
        /ID=B77_03286
        /color=7
        /locus_tag="B77_03286"
        /note="Ribbon-helix-helix protein CopG family"
        /product="Ribbon-helix-helix protein CopG family
[transcriptional regulator]"
        /protein_id="gnl|SC|B77_03286"
        /codon_start=1
CDS     complement(30194..30313)
        /ID=B77_03287
        /color=8
        /locus_tag="B77_03287"
        /note="molecular chaperone"
        /product="Molecular chaperone"
        /protein_id="gnl|SC|B77_03287"
        /codon_start=1

```

BASE COUNT 9471 a 5978 c 5527 g 9337 t

ORIGIN

```

1 ttttcttaa tgcaactcgt aacattagat ttttacatt ttcattgaaat taagtaaaga
61 aaaagagcat atggaattga atccatacac tctatgatta ctggaacttt atttcattt
121 taattcaaca aactagaagt tgtcagttta gaaaaccgga agtcaatcaa ataaagcttc
181 ccatttttct gattgcatg cattaaaaca catcgcaatt tgttctttat tattctttc
241 ttctgcaagt tctggaagct catcaattcc aaaataatca aaacctgttg tttcaatatt
301 cgttttaaat tgaccgcccg tcaactcaca ttgcataaaa atcttacata ctttatacgc
361 atatattgga agattatggt tctcctatc tgaacagca atcacagtt ttacagtaac
421 atcaagtctt gattcctctt tgacctcctt tattgtattc tctctacgg aaatatcgac
481 atcacaccaa cctcccggta atgaccaagt accatttgct tcatgaacca ataattttt
541 cccgtcttta aaaatcgcag ccctgtatc ttttttagga gtctgatatc ctacatcact
601 gcaaaataaa tttgaaactt tttctgtaga tatttcagtt ttatagctta tcatttcagc
661 agaaatttct cggattcttt catatcgttc tatatcaaat ttgtccttc cataaaaca
721 accacctga gcaatagctt gtaattctac tgcccatttt agccattggt cgtttttatt
781 catagattat cgctccttta aattccgatt tgttactcac atgatatcat atttttctt
841 caattgcatt ttcattgaaa aaatcattaa aacttccaat gttaaataata aataaagcaa
901 tatagttgca tcctactcg tattaagagc tgaaaaataa atataaatcc tatattaatg
961 aagaaggaat ggaagaaaaa agcatctttt gaatatagaa tacctaata atttgtaca
1021 ttcaaattat ttattggaaa caaatacaaa atttgttac ctaccctgt tttatcatt
1081 tgcaccagca ataattgtaa tatatatacc cctaatgaaa cagctaatac tgacatagat
1141 gaatgataa gagctgatat taacaatggt aactctcaa caaatccaat accaactaat
1201 tgcattgaaa gaattaaaaa gtatatttga atatggttat attgcaaagg gaagtcaaat
1261 aacccaacg acaatttgtt ttgtatgctt gaattccatc cgctcatatc atacattgta

```

1321 gagaaaacac ctatgttgac caattgaaaa ataataaata aactcactgt aataaactt  
1381 gtcgcaatca atttagcaaa tatcatttg tttcttccat attttgaac taacagaatc  
1441 tgattgatat ttttagaatt atcatctgaa aacactatgg aagataccea tattgtaatt  
1501 atggacaaaa gagcatatat atatccaagt actcgatata aatctgtcca tggaacataa  
1561 tttcctaag tcaaaggagt atcaaatttt ttaaaccag cctcgtcca tgaatataa  
1621 tccacgtctt ctattgttaa tctttggcct ttattaacct gttcaatcat ttctgaataa  
1681 acattttcgg catcttttga aaaaaagta tctcccattt cccaataaaa tggataaaaa  
1741 ggcttattaa caacttttg ctcttcattc tcttggaat tattcataga atcagacaga  
1801 atcattttaa cttttcatc tgtaaactct ccagaatatt tttcatctat tattacatcg  
1861 aggctctttt caaacccctt tttcttatta ctgcttcac tcattgatag ctgtgaatag  
1921 tgatacccaa caaaaaaat cccagaagg actaagcatc ctacaacaat cccacaaat  
1981 acagttcggg ttctcaatat tttccaagt tcaaacttaa ttagcgatgt catactctca  
2041 ttccccctct ctaaaaaaa acaatacaa atcttctaaa accggatcaa ctgtttcgc  
2101 atttgcaaaa ggtttttccc ttgaaataag tcgaagaaca actccgtctt ctccatatt  
2161 acgattactt actgtatata ctgctcaat tcgattact tcttttctg gaaccaggca  
2221 ttcccataca cacttgtaa tatcttcaa caaatatgtt attgtgcctg tattttcaat  
2281 tctacctttt ttagaataa tgatttcac tgctatata tctatatcg atacaatag  
2341 tgtagacaat aactatatt tttctgatgc aaacgaactt atcagtttc taaattaac  
2401 tcgctctttg ggatcaagcc ctaccgtagg ttcatctaat attaaaattt cggattatt  
2461 gatcattgct tgagcgatac ctagtctctg tttcattccg ccagaatact ttctgattt  
2521 tttatttttc acatcatcta agccaacctg aatcaataaa tctaaacatc tctttttgc  
2581 tattttcca ttaagcctt tcaatgaagc gatatacatc ataaaattta atcctgtaa  
2641 atcaggatag tatcgaaaat cttgtgtaa gaatccaaga atcgagcgat aatattctgc  
2701 ttgcagagca atatctttat ggtcatattg tatatttcca caattgctc tcatcagtc  
2761 acaataata cgaataaag ttgtttacc cgccccatta gcacctaata ttccgtaaat  
2821 tccaggagta aatcgatac acacatcatc aagcacagtt acattcccat atgttttgt  
2881 tatattatta atagtaatt ccatctgaa gctacctccc atttgattat ttagtttga  
2941 gaatataaga taatccctaa tattgtcgtt gtaatgaaat atgctattcc ccaataaagc  
3001 attcgaattt catatattt aaagatattt gcaattaaaa taactgcgac acaataactt  
3061 cccgatatac accataggaa ataattatgt aattgcttcc tccatatagt tataagcga  
3121 aataaataa tgcaacaat attgtatgga acaagtacat agactaatat ctgatacaaa  
3181 ggcaaagata ctatagattt agtcataaga gaaagcaaaa taacaattac catatcaata  
3241 atgcaaaaa tcaataattt catcataata tgttgcgca aatcatattt gaatgtctgt  
3301 tccaattccc acattcctgt agtaaaactt ttgaataatt catctataaa aaataaagcc  
3361 gaaatgaata ttacacctgt gatgcataac attatttcac ttatcggctg taaattttta  
3421 aaatttaatg ccatagttat ccctgataga aaaatgaata attgaattat ccaagtatga  
3481 acatgtatga agcgaagaat tgacaggaat agctcaaagt aagaatgtcg actcattcta  
3541 agtctaatac ttatttcata tctaattcg atgattttt cacgtccttc tatatcacct  
3601 tctaatttat aaccagcaa tttcgatata atatctttt tatccatcat aaaattcctc  
3661 tctttctaaa actttttcta attttctaag gccttgataa atacgtgact gtacagtaga  
3721 taccaccacg ccagtaattg tcgcaatata ttttacctt aaatcgtgat aataccgtag  
3781 tatcacaacc tctcgttga tttcaggaag taaatcaagt gctttttgaa cgtttcttt  
3841 tctctcatca tgtaatttt catcaataa tgaagtgtct aaatcagttg taaaattatc  
3901 tgtgagttct atttgctcaa tatgtctttt tttcaataa ttattgcaag tattgacagc

3961 catagtgtat agataattht gaaatthtcc tatgaatcgg tatctaggta aactthtctac  
4021 caatthttaa aaaatctct gtgttaaadc agaagctata tgcagcttc cataacatct  
4081 gcgaacacaa taaaaataca cactatcata atatttatgt actaaaatat cccatgcatc  
4141 aggatctccc atcttaattht tgtthtattat catccagtct tgtatcatat ccatcacttht  
4201 tctcttaattht attcttctct atataaaac aactaaccttht acaaatcat ttaaaaacac  
4261 aaaaacttht tatattattht ttatthttht ttacaatag ataaactattht ctccccctca  
4321 tgggcaaggg attaggagtht ccctgtggcg gttagtagc agtagttcga ttatctctga  
4381 agcgtgagtht ttcaaacttht atcggattct tggtagttgc cttagtagcc gttggtcttg  
4441 tattcaatgc gtccggcgta aaagatgtat tgttacagtht attcaataag attattggag  
4501 cataaaaaata gtattgctat tgtgcggaca tttgcatata ataaagatag atggaaatac  
4561 tactcacgaa aggagatgtht ttataggtc acaaatcag caaatthtata tgcaaggattht  
4621 gaaccagatg tcaaagaaaa agcagaaaag atctgtctca cacttggtat ccctgcttht  
4681 agtgctatca atatgthttht taaacagattht atcttacaga gaggacttht gttgaagta  
4741 aaaataccat ctgccagacc gttgatatc agcacattat cagaagcaga gttcaatgaa  
4801 gaattggaga aaggatagc ggatagcag gctggacgga caaaaaatgc gaagaaagca  
4861 tttgctgaca ttcgaagga ttatggctta tgatatatga agtagaatta tccgaacagg  
4921 ctgacagtgat tttgagaggg atthtthtgaat atattcttht tgaattacaa tgcgggaaa  
4981 atgcaagcgg acagcttgac cgtctggaag aacagattht aagtctggat acgatgccgg  
5041 agcgttatcg aaaatagaa aaagaaccgt ggaaaagtcg tggacttctg gtattaccag  
5101 tagacaatta tgtggtacttht tatattccag acagcgataa aaaagttgta acaacttht  
5161 gagtaatgta tgcgggacgg gacatagaca atcagthttht tctccacaca aagcaataa  
5221 ggatagattht taaagcagtc tttcatttht gatcagctgc tthtthtata ttcaaaatta  
5281 aaaagaaagg gctgaattac gatggaagaa ttagcgtat tgattgaaac gaccaaatca  
5341 gcagaggata acaacgaattht gctgaactgg aacagcagat agagaaagga cgtgatatag  
5401 atgaacgaat ccagagaattht aaagaaccg caacagttgg aagagcttht gtcctgacc  
5461 gaggagatac aagaagaact ggaacagaaa gaccagctta tctggaact gaagacgcag  
5521 ctcaacgaat ctctgatcttht gaacgagaaa ttaacaaaag agaacagagc cgggaattht  
5581 caagcattaa agaacgacttht gaagctggca gacagagcat tgcggaacga gaaagagaag  
5641 ctgcgaagcg caaacgtcat gatcggggaa tatcaaaata aatagctg ttaacacaa  
5701 caacgggatt atgcccggac acatcagaaa atcgtagaga taccggtaga aaagccggta  
5761 ctctatgaaa aatgtgaatc ctgtgaccgg acagcctatc agaatgaaaa agcgaatac  
5821 ggaacacaaa aagagcgact tgcggacag tataaagcaa aaacggtaat gttcaaaaca  
5881 acctgthtcc tcttgcatg gtattcgtg acaaccactc tthtthttagc agtacagthtcc  
5941 gatgthttht tthtccgattg taaatcttht tthtcatgag cagcgtcatt cctacaaact  
6001 tthtctgtht ggacaattga tgcgggcaa tctgtggcac agattagcac aaaaattcca  
6061 aatctthttht tagccggaat ggtatattgg tthtthtctga tattgthttht cggaatagtht  
6121 gtggcagggga cagggatact ggcgatactg atagaaataa agthtthttaga attatatag  
6181 aaaaactgtht gggatgtht tactctactg atgatactga caagtagc tgtcatcatt  
6241 tthtthtggag aagcaattht aaaagcacttht tccgtaatc tthtattgct tthtctacttht  
6301 tctcagggag tatatcttht aatcagatgtht tthtthttht atcggthttag taccagcaa  
6361 tattgthttht aacatgctaa aaaactgata atagcagggg ataaaacatc gthtccctact  
6421 attatataaa cagcgaagtht ttacctatct ctctthttht aaagattcgc tactgthttht  
6481 accgagattht aagthtthtct ctgtthttht tggthttht ca ctaccattht tctctgtht  
6541 gatgtaatct tthtgcatac ggaagcaaga gatacaattht tctthttht aaaaataat

6601 tacaattcct gttgacaag aacgatcatc atagaaggat tgtattgtc cccactcata  
6661 ataatttcg acgctgtca tactctttt actgggagta cctaagcatt tccttaaaaa  
6721 cctattatt tcttctgca acttttctaa gactgtacca ttcattgtct catatttcgt  
6781 agaatactt ttgtctgct gaaccaattc aatctttt acttttccat gtctccata  
6841 gattgtaaca taaaacttct tataaagcca ttttaaaggt ttcttagaaa tcaatattgt  
6901 ataagaatac tctgttgag caatctaaa atcaatttct ttaaataagg aaatacttcc  
6961 tttgggagta atttatata cccctattt taacatatct tccttagct catcctttat  
7021 ttggataatc tccactta ctataaaaac aacatagcct tcacacacta caacgtaac  
7081 tatttttgc catagcacat ctggaacaaa catgttcaa gctataacag gaagcaaagc  
7141 tactctacc gcagtcacca gtagaagcac cctccaaata taatttttct tctttttcc  
7201 ttcattagtt aaatttcat cataataaag atgacctggg gcttcgaatg agtttaatag  
7261 aaattcctt aaaaatgaca ccagaaccgc tcccaagaa gatttcttt gtccttcat  
7321 attaccaat ctctctgct atagattat tttcattct atttttact taacttatac  
7381 attagcaaga ttttagtta ttcttctaac aatatttita tccccgctt ttctgcttta  
7441 tgcgaaaagt caacagcaaa tccccatccc atctctgcaa attgccattt ctctgtttt  
7501 ttgtaattt atagcttca actgtagaca cttatttaa ttcaggatat aacttctaa  
7561 gtgtaagtat ttgtttatt ctgcttatt ttcattcca tataattgtt aattaacct  
7621 gtttctttc aaaaaaacc acctacata aatctgcata gcaggcttct ggtattgata  
7681 tatcattgtt ttttaacatt tttctctt atttaattt ataaaaaact tctaagcct  
7741 attaaaagaa atatgaagcc tattagagga acaggtatca tacaatgag aaacacatta  
7801 aatttttcc ttgctcatc agtatttct tcttttgta ctttgctt tttcataact  
7861 ataaaaggga atacagtaa taataatcct ccaactactg ctacaatat tttcatctta  
7921 tatattccct cttatctt aaataaatat taatcatgta tctactata ttcaatcct  
7981 aatgcactt ttcttctaca aattcttita ctatcgcta ttgatgtatt tcatattca  
8041 ctgttgaaa cagtatat tctcttita ccattacaac ttacataaa ctctctatct  
8101 ctagtttac cactgcta atctttgtct gttacaattg caattcatg agttgcccc  
8161 tcaaatgtaa ataaaaaatt tattgggaag ctattgtaa atgcgattat aaaagcagca  
8221 aatacaactg aaagtttac tccaaattc tgtggtacat ctgttttaa agatttaata  
8281 ataatggca gtgcaagtaa agcagtaata attgccgtaa tctcatata gttccaat  
8341 tcataattaa agagtttact cgtattcagg gataaaagca ttgctattgc tgcaccata  
8401 aatggtaatt gatacgccag ttctgtct tttttgtgg tgacttctat aaatataat  
8461 ggataatatt ttatatacac tgcataatg atcatcaaaa ccattataaa tataactaac  
8521 attgtttgc caccaataaa aatgctacc gcatcagcaa ttattagaat ccaacctaaa  
8581 gcttttaaaa attgctttgt tttttacgc tttctttt ctattgttt tgacatatt  
8641 ttgatagttg tattctcatt acatatagat ttatagaat tctttctat ccagttaaa  
8701 gcaggtaac actttgatac atctttgttc ttttcaacta actcacaaa atccacaaga  
8761 tctatttcat gttttataag tgtatcatat aaaatatcat aattacata cacttgctcc  
8821 agagtaacaa gtctattgta catcttatac attaatatga catctgttct accattaat  
8881 ggaatcatta aaatacaac aatattcatta tttttatat gctgagttt ctaaccaga  
8941 tagctaaata caattcatc ttcatttact acaattattt gtttctgta tgccaaaatt  
9001 aaagcaatac ctaaaaatac aaaaggcata aaacatatcg caaccccat atttctgta  
9061 acaaatgta ccagtagat tattaaaaa agaactgtt ttactattcc taaattttt  
9121 acaaattac ttaatctaat gacattatcc ataaactcaa tctccctata tgattcat  
9181 tttcattt ttacgttcta atttcttct atctttttt atttctgcaa tcttactg

9241 cagccagtcc acatttctat ttcgggcaga aatttagcg attttttct gattttata  
9301 taaaataaga gcttctcaa ataaattctt tttcttttc atctgggtaa tatccgtaa  
9361 tcttatttta cagttcttcc ttaaaaatcc atttctatat agccatccat ccttgacaat  
9421 tgttttgcc attaaaacat aaaataaatt tctaattatc ttttcataag ttctataac  
9481 accgatata ccttatttta caggctttat cgggttttc tttttggcag atacttcta  
9541 taaccactca taaatctgca ttctactaa gtccgtttc ttttgaaat atttttcaa  
9601 tgtcacgaaa gcggtttgca cagaatata gtggtaaaat attccaagcg tgaatggaat  
9661 ggtcgcaacc gctgtttgtt attgtgagtt gtccccatgt tactgccgaa ttgaacgcat  
9721 tatttaata gctcatatcc ttttctgta atgctaagta acttctaaa taaacaatct  
9781 ttttccgaa attttcatgc aataattca gccatataat aatctgttct tctggctttt  
9841 tactttgaca gtatttcgta tacttcttta atcgtcatc aatatatgcg ttcatgttg  
9901 catatcaaaa cattttatcc acattttgta aatatagttt gataagttcc ttttttcca  
9961 tagagtacct cgtttcaatt ataaaattt gctatttgc acataaatgc tttcaatccc  
10021 attagaataa gtataatagc aatatataca cccacttat cccaattata agtgtcataa  
10081 taaaattgaa aacaataca actttcttct gatttaaaga aaaatgttca aattttcaa  
10141 ggttgattg acgaataaa ctttagtaa ttatggaata aattgaataa ccaatagcaa  
10201 tgatacttga aataatagca ataatacag tcattttaca atccatatct tcctcctaa  
10261 aaagtttgc tatcattacc acaaaaatta aatatata atgtttaa tttttttt  
10321 tcttttgta aatagatact tttatatca catctataa aatgcggttt tgccttgtaa  
10381 atacagcgtt tccgcctgt tagtgtatag tgtctttgt tttttgtcc cccttgta  
10441 gataacgggg gcttaatctt cgctcgccac aggctcgctc acagacgaag taaaccagcc  
10501 acttgaaga catggcagaa aaactgaaa gattttctg ccaccgtgc tggatcactc  
10561 cgtctgccta actaataa tagtattatg taaaatgct atttattta ggtacatcta  
10621 ccgaatagct taaacagtca cctctttgt tactttgtaa gtcattgtaa taccatagat  
10681 acatgactct gtcatataca ttgatttcaa ttacaccgctc cggttttgt ccttctact  
10741 ccaatgaata gatttcttta tcatgtgcat agccgtaaac aaaacgcttg ctggataat  
10801 cggggtttaa gtctgttg aaatcactta atttcaaaga agagtgaata agctctgtaa  
10861 tatcatctaa caaatttcta tctcgtttcg ttgtaaccgg ttagcattt ataatgcgt  
10921 attgtgatg cccattctgt atctgcttt tacaacgagc cattaactag ccttgaat  
10981 catcgtatc atttccagcc cgatagaaaa tcgtatcata tttttgcct tgccatat  
11041 gcaaggttc atcaatga ttaagaaaat cagcaggaac cgaaagtcc tcattttcag  
11101 cattcaaagt ggaaagtga atagcttctt caatcgtgc ataatataca agcttgcat  
11161 tattttatc ataatcattt atcgtaaatt ccacgtattc attatcttta ttttctct  
11221 ccggaacata agtataacga ccattttcaa tatggatc atattcaaca tcaacaata  
11281 acccaatccc tatcagagct acaaaaatca aagaaatcgc tccaattatg attaacatta  
11341 ttttcaaaaa tttttcatg gcatacactt ccttaatcac ttcaagtta tctattatta  
11401 tttatcatat tatatcatta gaaaattgag tagtcatcac ttttctagta tctgtcagaa  
11461 tatttttat tcataaatt atcaagagtg taaacattgc tacgcaaca gctctgaca  
11521 attcatgtcc taaaaatga ttaataatca agcagaaaaa gaatagttat actgtattac  
11581 agcaacaaaa aagacatctc atattctgta tgaatgccca atttgcctt tatttatgt  
11641 gttttctctg tcgtatcaag gttcttcat tcgtagtaaa ttagtggtaa aattcttta  
11701 tttttgttt catattgctt aaaatccctg tgtttatgcg gataattcga ttttactct  
11761 tttgggata aaaactgcat cacaatcgc aacaaaaata taaaaatcaa ttttatctct  
11821 ttatcataat tatatacatc aactaacac attgtaaagc aaaaagcaag ccattttcag

11881 acttgctttc caccagatta ctgcacctta ttgccaatc atctccttat tcaaaattcc  
11941 cttttcacac tctgtatag tatttatttg ctaccattc catctgttta tctgccttca  
12001 actttcctt aatcccctgt gtctatttca tttgtctac aattgactat tattccagcg  
12061 attatataaa aaccataacc aatacaaaat atggaaacgg tgcttctaac tataaccgcta  
12121 aagcctttcg ccattatccc gaaaatagta ctccagcaga gaaatagcgc cagcagacat  
12181 aaaaaactcg aacccttgt aaaatgggca tcagaagttt tctaccggtt attcttgttc  
12241 tataattcaa gtgaatcttc tgaatctatc cacatctgta aattgccatc gagatataat  
12301 cttgcatatt ctaaaggctc atccacagcc aatgaagtaa gcgcacattc tgatccatat  
12361 gtggttttta aatcttttc agtccccag caatcaatgc gaagcatata tccaacactt  
12421 atgcttttct cttttttca ttctatcaca agctcacat taatcatcat tttttgata  
12481 tttttcttt tccccactg taaaacaggc tctcagcgtt tcgttatata gaggggtaca  
12541 catacagagc aagatccacc catgtttaac agtattgccg tttggcatcc tgttctcta  
12601 tgggatttat ctgatgggg atctccccat acctcttaa taacagacgt ttacttgtc  
12661 tgttggttcc acctgaaggt gttcacggca ctatttctaa tatcggaagg gacagccgat  
12721 attgaaatac gtggactccc ggcgggagga atagtctcag cggaaggagg agtatgagaa  
12781 caaaaaacaa agataaagaa ctgaatcaca gacattttat aggattacgt cttacagatg  
12841 tcgaactgga tttattagac caaggcgtg cttgtttatc tattagccga tcagaatatac  
12901 tgagaaaact tctgcttgag aatcaaatca atcatcagat tgaagttgtt gcagacatga  
12961 atgacctcag aaaactggtc agtgaatatg gaaagattgg atcgaatctc aatcagatcg  
13021 ccaagcattt taacagtggg ggcagtcagt cacgtgctat agaaaacgaa atccatcagt  
13081 gtatcacgga cttattccta ttgagaaaag aggtactgaa actggcaggt ggtatgaatg  
13141 gcaatcgtaa aacacattaa aagcagaaat gcaaattact cagctgctat caattatctt  
13201 ctgtttgaac atgatgaaaa aaccgggaaa aagattgtag atgaatccgg acgaagcatc  
13261 ttgcgaaaag agttttatat ggatgggctg aactgtgatc cgatgtcttt tgacaaggaa  
13321 tgtgaactga caaatgtcct tttcacaaa aataaaaaac gtgaagatat caaaagtcac  
13381 cactacatta tcagctacga tccgagcgat gttacagaaa acggacttac cggaccaaga  
13441 gcacacgcaa tcagtttga acttgcaaag cagatgttcc cggatatca ggactggtg  
13501 gttactcata ccgatgggca caatgagtc ggaaatatcc ataccacat cgtcatcaac  
13561 agtgtgcgga agactgcagt agaaaggcag ctttatatgg ataaaccaca tgaggaagcc  
13621 gccggttaca agcatcgttc cactgataaa ttcatgaaca cttttaagaa aacagtcatg  
13681 gatcgggtcc aacaggaagg acttcaccag atagatcttc ttgctccggc tgaagaaaa  
13741 atcactcaga aagaatata ggacagaaa catggccagc aaaaactgga tgagatcaat  
13801 caaaaaatca tcgaagatgg tctcaaacca acatccaccg tgttccttac acagaaagaa  
13861 tatttgcgaa atgcgattga tgaatgcgct gccacatcca atagtttga tgaattcaa  
13921 tctaaacttc tggaactatt tcagatctct gtgattgagc atcgtggcag atacagctat  
13981 cttcatcctg atgcacagaa gcggatttct gaactgcac tgggaacacg atatggaaa  
14041 gaacacctgg aacagacctt cttacgcaag gatccattgg ccatttctta cgtcagatct  
14101 cacctgtgcc tgggtgtaa tctccagaca aatgtgaaag caatgcagag cccggcttat  
14161 gctcatcggg taaaactttc taatctgcag caaatggcaa ataccattat ctatgtgcag  
14221 gaacatggat ttgatacgc gtcagatttg aaaaaaacac tgcttgcac aaagcaggaa  
14281 ttgaaagaaa tgcagacaca gtttgcctcag catcggcca atctaaggac tctcaatgat  
14341 cagatccgct acaccggaca gtactatgca aacaaggaag tttattcca attttcaaat  
14401 gcaaagtaca aaggaaagta ccggaaagaa catgcgaagg aaattcagaa atatgaagaa  
14461 gccagagatt ggctgagatc cttttatcag gatggaaaga tgacaagcct aaaaacctg



14521 actttacaaa aagaaaaact gcaacagcag atagcttccg aagaagaagc aataagcagc  
14581 ttgaaagaaa aattaaaga tctggacact gccgatcaga atgttgatgc cattcttcag  
14641 atgcagatac cagaaccagt aagatcaaaa aacaaagatc tcgaacgata actatcacia  
14701 aacaaaggag gaactatcac atgacacaag aagaatttaa tattgtattt gaacttcaga  
14761 tgagaaagtg tgccgatatt ctggcacata aaaagaaaga atataccggg gacaatattg  
14821 accgcctcag tgcattcaag attgctgccg ccttacaaaa ctgcatcca aaagcagcac  
14881 tggccggtat gatgtcgaag catgtcgtat ccctttacga tatgtgttat tccactctgt  
14941 tacattttga catggaacag tgggatgaaa aatcacaga ctgcatcaat tatctgatcc  
15001 ttttaaaagc tctggtaaag gaggaacagg cctatggatc acattgaaac agctatctta  
15061 aactgctatg gaatccggga agcagaacag aatatggctt ttgctgccag actcacacia  
15121 cacggtcata cgatccagaa catggcagat ctgatggatc tttaccgtca atcctacagt  
15181 cagaagactg tagaaaacat tgcagggctt ccgcatcaa ccgtgcagaa atctatggct  
15241 attaccgtag ctgtgttgg tgcaagcaga cgcttctgg cacagatcac aagacatcag  
15301 aatgaagtaa agtacatgag tgcattctg cagtacagca attattccgg tcatgctgca  
15361 tttgctattc catatggaat catgaaagca gataaagaaa tccaggatat ttacaagaaa  
15421 agctgtcagt cagatctgga tcattatgca gagcttttg ccttaggcat tgatcatgat  
15481 tcagccggat atgccacacc tcagggactt cgaaacgtac tgatcatcag cgcgacacct  
15541 taccagtgga agcatatgat tggtcagaga acctgcagaa ggaatacggg tgaaccagg  
15601 atttgatgc tctatatctg gcaaagattg tacaattaa gcccgattct tttgcacca  
15661 gatctgaccg gtccattctg tcagagagga agctgcatgg aaaaacagat gtcctgtcag  
15721 aatcccattt caaaacttg gatgctgca gatattctaa aacagatta tccattgtg  
15781 atccggaagg agatgagcag ccataaagat taaactgatt gactttggct tgaagcaga  
15841 tcatcatcca ttccggccac atgaaaatga tgccggtgct gatgtattca tgccttatga  
15901 ttgcttatta aaaccaggcg aggttgcaag aattccgctt ggattcggct tcatcatccc  
15961 agatggattt gccggatag tctttccacg aagcagcatg gcagcaaaag gactgggatg  
16021 tgaacttcca ccgattgact ccggttatcg tggtgaaatc catgccatta taagcaactg  
16081 gagcacatct tctcagacca ttcataaaga cacacgcgtc ggtcagctgg tgattacacc  
16141 ggtcgtgatc gcagattttg tcttgacct tggatgaaag cgaggaactg gggcattcgg  
16201 aagcacagga gaataatact atgattacat ttggaagaaa attaaaacac ttaagacaaa  
16261 aaaatcatct caccaaaaaa gaacttgga tggctgttgg atttccgac agctgtgctg  
16321 atgtccggat tgctcagtat gagagtgatg tccgaaagag gatcttatga agcttctcgc  
16381 atcaacactc ggtgttccgg ttgaaactct taccgtaccg gtactctcag aaccagggg  
16441 gtatgaggcg gcggagtatt ggaggtatga gttagggcg gaactagatt aagtgtcgt  
16501 tactgtaatg aggcaacgga ttatccgctg cctctctttt atcattttag ggtaataat  
16561 tgaataaac ctgtattgag caatctctt tttctcgcct ttatctacat atctatata  
16621 ttactttat ttctgttcca tcgataagaa gcacatattt atccggatta tgaacaagat  
16681 cataatcttt tccatattca atcggctcaa attctatttg cataatggat tcgccatttt  
16741 cgatatcttc tttcaagaa tatacgggtca tatcaaggct ggttgcatat ccatgatctg  
16801 tagaaaattt tattgaatga aatgaattct cttgtacat ttttaaaagc agtcttgcaa  
16861 atgcttcttt atcagaaata tttttctgt tagcaactac tgtaaaattt tcatctctat  
16921 tcatagaaaa actgccaact acatctggct cacctctttt atactttaat aagctttttc  
16981 caattatcat tccaacaata atcgaaaaaa cgatagcaac aaatacaagt gttatattat  
17041 ttttctcat ttattaagt tcctagaat tatatagttg aattaaatct gtatttcaa  
17101 taaaacgcct acaaaagtggt cgttttatta tcttaatact atttaatttt tttcattct

17161 tcaacaaact gttcttgtgt aattctcgca ttaatacat ttttcctaa aaacaattca  
17221 tctttatcac atgtagcaaa acatgatttt acccaattaa ctttttatt taattttaa  
17281 taatgatga aaccagataa ggagaaaacg taaattgtgt taatgatagc agacatgagt  
17341 atggagtga tatcttattt ggaggaaaaa caaatggtac aatcaatctt tgaggaaatg  
17401 ggcggcagat acgaacggca aggcgaatac attttacct gccttaccat accacccgaa  
17461 aaggaacagt cgatagactt attcggacgg cggcacttgg actatctgcg ggagtaccgc  
17521 aaaattacat acaccaatct ttcacaagc ggcaggctca atgcttacct tgccgacatt  
17581 gacagacagg cacaggaaca ctttgaacgg ctcatagagg gcatgaagca agcacagggc  
17641 ataacggaat gcctaaagga agaaaacgcc ttagaatgga ctggaagaac gaataacata  
17701 agggcttgg cgaggagat tgtgaaaag gaaattattt ttgcataaac agatgattag  
17761 tggcaggggg aaatcctgcc gctttttctg ctttagttg tcagcttgac aaataaaggg  
17821 ttaaggaata taattagatt cagtattata caaggagta ataatatgc ggcaaggat  
17881 tctaaataa actgtcaatt tgatagtggg acaaaaagt agcagtccg tttcatttt  
17941 aatatggggc ttagttttt gtaccagtt taagaatact tttatcatgt aattttat  
18001 gccgaaaac atataagtgt tttggggcta ttggagtat ttaccagtg ataggagtat  
18061 ttactctgg gtattttat gcccttttt gggtgttgat aggaggaaa tcacatgaaa  
18121 ataattaact taggcattct ggctcacgtt gacgcaggaa agacaacatt aacggagagt  
18181 ttattgata ccagtgtgc aattgcagaa ccaggagcg tagataaagg cacaacaagg  
18241 acagatacaa tgaatttga gcgtcaaagg ggaatcacta tccagacagc agtgacatct  
18301 tttcagtggg aggatgtaaa agtcaacatt atagatacgc caggccatat ggatttttg  
18361 gcggaagtat accgttctt atccgtatta gacggagcag tattattagt ttctgcaaag  
18421 gatggcatac aggcacagac ccgtactg tttcatgcac tacagacaat gaagattccg  
18481 acaattttt tcatcaataa aattgacca gaggggattg atttgcaat ggtatatcaa  
18541 gaaatgaaag caaagcttc ttcgaaatt atagtgaagc aaaaggttgg gcagcatcct  
18601 catataatg taacggaca tgacgatag gaacagtggg atgcggtat tatgggaaac  
18661 gatgaactat tagagaaata tatgtcagg aaaccgtta aatgtcaga actggaacag  
18721 gaagaaaaca ggagattcca aaacggaacg ttatttccg tttatcacgg aagcgtaaa  
18781 aacaatctgg ggattcggca gcttatagaa gtgattcca gtaagttta ttcatacag  
18841 cctgaaggtc aatctgaact atgcggcag gttttaaga ttgaatattc agagaaaagg  
18901 cggcgtttg tttatgtgcg tatatatagc ggaacattgc atttgaggga tgttattaa  
18961 atatctgaaa aagagaaaat aaaaatcaca gagatgtgtg ttccgacaaa cggtaatta  
19021 tgttcatccg atacagcctg ctctggtgat attgtaattt taccaaatga tgtttgag  
19081 ctaaacagta tttggggaa cgaaatgctg ttgccgaga gaacattat tgaatcct  
19141 ctcctatgc tcaaacaac gattgcagca aagaaatctg aacagcggga aatattgctt  
19201 ggggcactta cagaaattc agatggcagc cctctttta aatattatgt ggatactaca  
19261 acgcatgaga ttatacttc tttttgggg aaagtgcaga tggaaatcat ttgtccatc  
19321 cttgaggaaa aatatcatgt ggaggcagaa ataaaagagc ctactgttat atatatgaa  
19381 agaccgtta gaaaagcaga atatacatc cacatagaag tcccgcaaa tcctttctgg  
19441 gcttctatcg ggtgtccat agagccgctc cctattggaa gtggagtgc gtatgaaagc  
19501 agagttcac ttgatattt aaaccaatcg ttcaaaatg cggttatgga gggggttctt  
19561 tatggctgag agcaggggct gtaggatgg aaagtacag actgtaaat ctgtttgaa  
19621 tatggattgt attatagtc tgtaagtacc cccgagact ttcggctgct tcccctatc  
19681 gtattggagc aggttttaa aaaagcaggg acagaactat tagagccata tctccattt  
19741 gaaattatg caccgcagga atatctctca cgggcgtatc atgatgctcc aaggtattgt

19801 gcagatattg taagtactca gataaagaat gacgaggatca ttctgaaagg agaaatccct  
19861 gctagatgta ttcaagaata caggaacgat ttaacttatt tcacaaatgg gcagggagtc  
19921 tgcttgacag agttaaagg ataccagcca gctactggta aacttattg ccaaccccg  
19981 cgcccgaata gccgtataga taaggttcgg catatgttcc acaagttagc ctaacagctt  
20041 gcataagtcg tataaaatga gatttgaaag gattagaagc taattatgat gaaatgcgaa  
20101 tggatattat gtctgtttg tgggagcaaa acccgtaata aaattaggaa ggacactgtt  
20161 ttgaagaatt atcccctta ttgtcaaaa tgcagacaag aaagattgat taaagtgac  
20221 aactgaaga taactgtcat caaagagcca gacgcttaag acgagagcc gatgaaattg  
20281 tggaacaatt cacgaatcat cggctcttt ttgttcgtat ttgaaagaac aaactacca  
20341 aataaaaaaa acgatattcg ggtgggttat tttgttatac cctaaattac cctctgaatt  
20401 tgttttaaa tttggagggt tttatgttc ctttttcgg gcggtgccc atctgcttat  
20461 ataaagcaaa gtttattat acatagcaca tcagggaatg gcgggaagcc agttaaanaa  
20521 atccctgcca gtgcaacggt acttcccacc atgaagtag aagtacaatc tccatacaac  
20581 agaattagta tttccataa ccgtaaaggt cacaaagcct ttgcggttt tctttgtcg  
20641 tttttggtg gaaagtgccg caggactatt attggtgta agtgtcgttc gccgccttc  
20701 aatctggatt tttatgttt caaagattca gattgattgg aggaaaaag aatggcatat  
20761 aacaacggac gtgaggacag gaagtggcgt atctggaaag aagccgagga aaaagtgtt  
20821 cgggaacatg gagtgatga agtaccatc gaacaaatcc gtattgacga cagggcagac  
20881 ttaattcca acaggcgtt ttaccattgg acaagcatt tcggggaata ccttgaggga  
20941 atggcagaca gggaacagtc agccgaagta aagaccgtt aagatttact ggatgaaatc  
21001 gaagatgaaa atctgtatca ggcattact acggtggaca ggcgtact gcaaatcgtt  
21061 ctgtgaaaa tgaagggtta tccacaaaa gagattgcc cgcttgca ttaacgacg  
21121 ggtgctatct atgcaggtt agaccatctt agaaaaagt tgcggaagat tttatagta  
21181 tctaatacag catgcttct tatgggctat tgggtggggg ataaaattct cccaccaat  
21241 tttagaataa gtgaataaaa tccctgtcca tagagaatac taaaagtgtt gtgcaaatc  
21301 ttgacagcca tattgccgt atggtattct gaaatacca tggggaatt ggaagattga  
21361 aaattaaata agcacataga tataagattg aatgtcagc caatcgcaa ggctgacatg  
21421 ggttttgaat ttcaaagcc ctacatagca ttgcgaatca gagcgggagg gaatcctctt  
21481 gtcgttcgtg atgcagtgtg gcgcttttt cattatcca aaagtcaaag gcaataaat  
21541 ccagaacgga ggtgaaagg acataggatt tccttttcgg agggtaaagg caggcattaa  
21601 gaaagccgtt acacagaaaa atgctctgcg gagttgtcca cagagatagc gagcatcgga  
21661 ttgtgtcagc cacaatcaa tccacacct aaaggcgtgt ggactaactt aggggacaac  
21721 ccctagctac cccgataaaa gaaaaataa aactggagga ttaagaaaa tgagtagaga  
21781 aaaatcagaa aaagtatgca ttacttttag attgagcga gaagaacatg aaaaattaa  
21841 gcagtattca tccgctgcg gtctgtccac cgcagaattt atgcgtcagt tatgcagggg  
21901 aaacgcaccg cagccacagc cagagaaaga atttgggaa ctattaggca cgctttacga  
21961 agtacagta gccttaaaa agtgtatccc ctacgccct tccgtgatg aaatatgacg  
22021 ggagattgag gattttatct tggactgca acggaattat accctcccac agcagtttga  
22081 catggaaaaa ttgacggaac agggggcagt ctgatatggc ggcaacgagc ctctggcaca  
22141 tcgaaggacg gttgaaagac ttaatttct atgtgaaaaa cccagaaaag accgtgccga  
22201 ataaggagat gcaggactt tttgacgtgt tctctatgt gaagaatcca cagaaaacgg  
22261 acaatggaga gttgtttcc gccatcaact gtttaaaaga aacagcgtta cagcagatga  
22321 ttctaacgaa aaagcagtac cagaagacag gcgggtatat cgcttgccac ggctaccaga  
22381 gctcaagcc agacgaagta acgcccgaac aatgccacga aatcggctta aaactgcca

22441 gggaaatgtg gggcgacaag taccagataa tcgttgtcac ccaccttgac agggggcatc  
22501 tccacaatca cttctgcttc aactctgttt cctatctgga tgggagcaaa tataattact  
22561 caaaatcggg gcagaaacgg ctaagggaaa cgtcagaccg cttgtgcaga gagtacggat  
22621 tatcggatgat tgagaacccg aagaaagcac cgtcaagacc gctgtatctg gatgaaaaga  
22681 gcggcaagcc gacacgctac aacgtctatc tggaagattt agcggaggca atcagcggca  
22741 gtcgggatat tccgcacatg atgaagtatc taatcgacaa aggctacgag gttgattttt  
22801 cgggcgggca ttgaaaaatg aagctgccgc agtataagca tttacaaga ttagatacgc  
22861 ttgatgaacg ctaaacgccc gattttatcc gttcacattt aggcaaacgg gcaagatag  
22921 ggaactacaa agcaaagatt tctactctc cccatagcc cgaagaatat aaaaaggctt  
22981 ggaaccgca ccagaaaaca aggggaatct tagcgttgta ttactattgg tgctatcagt  
23041 tggggatatt tccaaaggc acggactaca agccgacaag cccgcttatg aaagaggagc  
23101 ttcggaaact ggatgagatt accacacagg tacgctatat gtcggagcat aacatctcca  
23161 ccctctccga ttgcacgcc gacagggaga agaaccagac ggaaatggac aggcttacca  
23221 actatcggcg gcatttgacg aataagatac ggcgtgcttc acccgccgag aaagaaacgc  
23281 tccgagaaga aaaaaacggg gtgacggaac ggataacgga gctgcgaaag cggctgaaat  
23341 atgcggacgg gattgaaaaa cgctctgcc acattgatga ctgcttgaac caaatccacg  
23401 atacggttga aatcaaagg tcaaacgaga atggcaggac agaccgcaag agggaggacg  
23461 cattgcatg agcagactga cagaacagga acttacggaa attttagacg aaaataaggg  
23521 tatctaatg gtaaaccca atagggtgta cccgccctg ccgctgctg aaaacattat  
23581 gccccttatg cgtatccctg aacaggcaac gctctgcgag aaaatcggcg gcacggaata  
23641 tacagtacc gcacatttcc gagaggacgg gagggacttg cttgggcttc tcagcaggat  
23701 atcatgcgg gacacagcag attacagttt tgattccgag ggttatgatg aggattaaga  
23761 aatatcgga agattatcg tttaaagcgt tgaagttga ccgaggcgt ggtatactgt  
23821 atctacactt catactatcg tgtctgctgt cggaaaggag aaagcattgc aaagacagca  
23881 ggaagaaatc accgcctgt actgtcgtct gagtcaggac gatggacgtg aaggcgagag  
23941 caacagtatc gtaaatcaaa aagaatatct attcaagtac gctaaggaac acgggtttcc  
24001 aatcccacc tactatgtgg acgatggcta tacgggtacg aattttgctg gggtagata  
24061 gcgatacttt ttacatctac catgttcggg cggatcatggt tgacaacttg cgtcggctcc  
24121 tgctcggat caacctgtcc gacaaagcta taatggattt cgattttccg ggtgttggtt  
24181 tcccgttcta atcatgtat caaaatacgg tcgataaact catggacgtt ttcataggtc  
24241 aattctgta tgcgctgta tttccgaca atctgaataa acctgatat atccctttt  
24301 cgctcggtaa cggttgcgat ctgctgttgt aactcgtcta tccttgcggc aagggatttc  
24361 tttctgctt catagccgga agtagaaac acaaaccgtt catctgtcag tctgccta  
24421 gcgttgcct catacagctt gcgaaaagc gtgtcaagtt cggtcatacg gcctgtgct  
24481 ttgaaaagtt cttttgctg ctgcgcta atgcctttctg cttccatgct gccgtactcg  
24541 gtagctttac agataaagtc ctgttcgtgt tccttaacat accgaaaac ccgccgata  
24601 tttccagca ctaaatcaag aagtacgttt ttgcggatat aatgagaggt aactcgtc  
24661 cctgtccttg cctgttcg ccatgcgcc caagaatagg aaaactgctg cggctcgata  
24721 ttacgccct gttgtaata catcttatgt ctgcaaccag cgcaaacag caagccgga  
24781 aaaatatcaa tctccgtgc tttgtcggg cggtgccggg tagcaatccg cttttgcga  
24841 agttcaaagg tttctcgtc aacaagcggc tcatgggtgt ttgggaagaa atagcgttgt  
24901 tttctctgt tttccgggc cttttcgac ttgtaggata cttgtgagt tttcgggtt  
24961 atggatgcc ctaaatatc ctgcctgct aatatgtcat agagcgtttt gtccggcaa  
25021 gtataggggg cgatcattgc ccgctgatac cgccctgct ctgtacgctg atagcgaac

25081 gctccaatcg tcaagacttt gttttccgca agccattttt ggatttcgca catacgcacg  
25141 ccgctaacaa acatagcгаа aacctgtttg acaatcggcg cggtttccgg gtcgggtata  
25201 aggtgggtggc ggttgttcgg gtctgggata tagccgatg gatattccc gttgacgcgc  
25261 tcgccttttt gcgcctgtgc ctgttact gcgcggattt tcttgcttgt gtcgcgggcg  
25321 taaaactcgt taaaccagtt ccgcaagggg gtaaactcgt tatcctcccg cgctgtgtca  
25381 actccgtcgt tgatcgcgat atagcgtact ccgttttcgg gaaatacaat ctctatgagt  
25441 tcgcccgttt tcagatagtt tctgccaaga cgggaaaggt ctttggtaat gaccgtcgc  
25501 actcgtccgg cttccactc ctgcaacatc gcttgagcc cctcgcgctc aaaactcacg  
25561 ccgaaaaatc cgtcgtccac aaaaaacttt gtgtcaaaa aatgggttc gtcgcatag  
25621 cgttgaagta tcattttttg gtgctgtatg cttccgcttt ctccggcttg catatcctt  
25681 tgacttaaac ggacgtaaag ggcgggtgatt ttattcgact gtaacattag tcctccttc  
25741 cgacagccga ataaacaggt ataatgtgtt gctatcatta taccatatcc cgccgctaa  
25801 tgcactactc ggacgctaaa aatcccggat ttccgggctt tttctgcaa tcctttaca  
25861 tgagtttctc aatcttttta tggattgtat cggttgcctt ttcactcggc aacgctgaa  
25921 caagataggt gattttccct attttgcgtt cggttgtaat tgtctgtttt ttatccatta  
25981 gaaaaacctc cttttcctgt atggataaac tatattcgtc aaaaggcaaa aacgggcggg  
26041 tgttagctgc aacctcacgg gagtttcacc ccggcccatg cttatgggtg cgccgcgcaa  
26101 tactttgagg gtgtcaacg cgggagtatc attgtgccg cttgtatgct gtcgccaca  
26161 agctgctaaa cctgttttac ggcgcggtag ttctcgtcgc gcttttccc tatggggaaa  
26221 agctgtcatg gcgtaccgc cgactggctc ggtacagacg gaatgtacc gtttgcctgt  
26281 tatgctgctc accaaaggcc gctttctttg tcaaagaaca ataggctttg tcggcctgca  
26341 aaagcacatc aacagcggat atgcttttgc ggaacgacaa atagccata acgggaagcg  
26401 tggaaagggg acacgctccc cgcatgggct aaaagattat cctacatgaa aagcaagggt  
26461 gcgggtaata aggcgcactt gcagcctgtt acgcatttcc tcgtccacat aggaataggt  
26521 attgcccgcg tcgtctttca gcgtcgggtt acaaagtttc gctatgtaac cctcgtagt  
26581 cttcaagatc gcgcacatgg cggttgtgtc gccgtttgcc gctgcggaaa tgacagggaa  
26641 cggcaacaga ttttcagact tcctaacggt atcatcatc tgctttccc tcaaatact  
26701 gtttgatttt cgcaagcgcg gatttctgt gccggaaaac cgtcgtgctt acaacattca  
26761 gcagttccc aatttccgcg tcgtcatat ccaagaagta ggacaaaagg ataattgctc  
26821 gtttctttc gggcaaagcg ttaagggctt cggcaagcag ttcattttg acgagtacat  
26881 caaagccgga cacttgaaaa cggaaataat cgcttcgta ttcgtccgtt gtgaaaagct  
26941 gcgcgagttc gctttcgtc aatccgaaa aagtaacttc gcgtgctgct cgtttcga  
27001 gagtgcggcg gtggctttt gcttcgccga ccaaagttt ctttgctaat gcgtcgtact  
27061 gatgtgtat tctttcctg tcggaagaag atagctccat agagttcacc tcctcccgc  
27121 gtggagtaga ggacgggagt taagggttgc tcctctctgc cccttcgct ccgtaccct  
27181 tcgggagatg gctcttgagt gcgctttca gaaaaagtt gaaaaagca aatgcgcc  
27241 gtccgcaaga cgcggacggg cgcaaaggaa atgtaagcag tagctaaatg tattgacagt  
27301 tcacattcat agccggaata tcccgttgc ggagcatagc ttttttgac cgcaaagcat  
27361 taggcgggtt acagtaaata aaaatggaca cggcgatacc tccccgatac cgccgtatcc  
27421 ttaaaaaagg gcgactttaa tacactacc gcaatcatt ctataatagg gaacagcggc  
27481 ttttgcgcaa tattaataa aaaagccgat aacacatagg tttttgacc taatgcgtta  
27541 tcggctctgc gtctatgctg ctggcacttt taatcatttt ttttgaatt tattatagt  
27601 gttagctaac tgtccacaag ccgcgttaat ctctctgcca tgagaaactc tcatagtaac  
27661 ttcaagtcct gcttgctcta attgatgttt gaatgcaact atttccggtt tctgtggtgc

27721 ttaattctt gaattgctt tgggttgta ttgtaacacg ttaacataa ctttttgcc  
27781 ccgaaacat tttgcaagtt gtcttacatc tgagggccgg tcatttatac ccggtaaaag  
27841 caaatcgc aagacaatt tgcgattatg ctttcagaa taggataagg ctgtctaac  
27901 aacatcttca atagcatata tgcgcatgtg aggaataata cgatttcttg cagattgtgt  
27961 tgctgcgtgt aaagatattg tcaactgaat ttaagatgt tcctcgcga attttttaa  
28021 ttgatcgacc ggaccaactg ttgatatggt aatgccgtcg gttggaaagt tgagccata  
28081 tctatctcgg agaataatgga ttgctttat caagttgtca taattgaata aaggctctcc  
28141 cataccata aaaacgatac ggtttacttt tcgacgcaac aatataatct gttgtacgat  
28201 ttctgacgat gtagattac gaacaaagcc atttcgccc gactcaaaa aaatacaacc  
28261 aacaggacia ccgacttgtg tgctcagca aacagttcca ccatctcgc gcttgataaa  
28321 aaccgttca atgtattgt tgcctttcag ttcgtaaaca tactttcag tatcactgct  
28381 ttgcaata tttttacca acattgatag atttttttg cgtggaatt gcttatataa  
28441 ttctcatat aaggctttg cttcattctc gccaataact tccgacattt ctttgaagt  
28501 aatccgtat ggatcattcc gtacttccgc aggcgtatat ttaggtaaac gtttcattt  
28561 tataccttt cttctaaata ataaaagttt gttttctgt attttgatt acaatctta  
28621 attttctac atcaatgata tgcgtcaatt tgcatttagg gcagaaaaga ggaaaatctt  
28681 ttaatacagt attatgaat actgaactc tcgtctttcc gttacaaatc ggacattta  
28741 tccaatattt ttaagcatt atatttact cgtcctttt acacaaaaaa atgcaggta  
28801 atcctcaaca tgagcattga cctgcattta taatgcacag agcagtacaa caaaactaag  
28861 gcatagcttg cactatgtct atactatc tatacgtcgt tagtttttg tatagcatcc  
28921 gcaaaaataag catgacaaaa aagcccatgt tgaaaatggg aaaatcctt tttcaatgc  
28981 ttatctaata cgcagctat gcaacataaa cgccgctcc tttacataa atttatttt  
29041 atcagaaaat cagtctactg tcaatacaca acaggaagta ttaacctaa tgatatgaat  
29101 tgtgtggaca tatcaaaaa gaaaggtgaa ctgtaaatg taacagggtg aatgaaaatg  
29161 gcaaaaagac ccgtaccatt gtacgacttt aaggctttc gggcagctat aaaagccgcg  
29221 agaaatgaat acggcgagag ccgcaaaaag gtaagcgacg agttatatat tccccgcg  
29281 taccttgcga atatcgagaa caagggacaa cagccgagtt tacaggtatt ctatgacctt  
29341 gtaaccggg atcatattc ggtagatcaa ttttcttcc cgaacagcaa tgcggagaaa  
29401 tccaccgggc ggcggcagct tgacgcgctg ctggacggta tgagcgataa aggcatacgg  
29461 attgaaccg caacagcaag ggagataacg gaagtcgaaa aagcagagga ttaacctcac  
29521 aatagagaa atcgggagat tgcagcgc atggcgctgca atctttttt gcgtcaaaa  
29581 tcaaaggaac gcgcaaaaa ttagatatac cattcatccg tttatctgc agaataat  
29641 gcgttatta atattgaatt tcctgtttta ttatagta taattcttg atcttgccg  
29701 ttgatcattt gcttgattct ccctgcatg aatttctcat ttgtcttgat tagattctaa  
29761 ttctttta attttttca ttttctcata ttcacgaaa taagaaatta atgctcttc  
29821 aacagcaacc gttttgtat gtctgcatc ttcaaaaaa ttttcaatc gtcataaat  
29881 aggagtttca atacatac taaggtatgt tccattctt tttgtcttg ccatttttt  
29941 ctccctgcat ttaatactat tacatgaatt ttctcaaat aattgtacca ctgaaaacta  
30001 cttaaatcaa ctattcacta ctgttatca aatataaaa agataaatc aggttttga  
30061 ctactaaatg attttaaaca aaataaggcc caaaaggaa cttccctt tgagcctata  
30121 cactttatca gtaacatat tttgcttca ttttctca tggctatgag gctttttct  
30181 cttaaatcgc attctatgaa tccttgatt gttcctctg ttctcaata atctgtctg  
30241 ttgctttatg aattctgtcc ttagaatagg gtggtcttaa attcaatgac aaccgacct  
30301 tttgattat ata

//

DEFINITION Integrative and mobilisable element IME\_4

CDS complement(1..1161)  
/color=9  
/locus\_tag="C83\_01573"  
/note="Tyrosine recombinase, similar to AA  
sequence:UniProtKB:P0A8P6 protein motif:CLUSTERS:PRK00236  
protein motif:Cdd:COG4974 protein motif:TIGRFAMs:TIGR02224  
protein motif:Pfam:PF00589.16"  
/product="Tyrosine recombinase [recombinase]"  
/"ID=C83\_01573  
/protein\_id="gnl|SC|C83\_01573""  
/codon\_start=1

fasta\_record 1..51034

/ID=C83|SC|contig000001  
/label=C83|SC|contig000001  
/note="C83|SC|contig000001"  
/colour=5

CDS complement(1286..1525)  
/color=9  
/locus\_tag="C83\_01574"  
/note="DNA-binding domain excisionase family  
helix-turn-helix domain-containing protein, protein  
motif:TIGRFAMs:TIGR01764 protein motif:Pfam:PF12728.1"  
/product="DNA-binding domain excisionase family  
helix-turn-helix domain-containing protein [excisionase]"  
/"ID=C83\_01574  
/protein\_id="gnl|SC|C83\_01574""  
/codon\_start=1

CDS complement(1970..2575)  
/ID=C83\_01575  
/color=7  
/locus\_tag="C83\_01575"  
/note="RNA polymerase sigma factor Sigma-70"  
/product="RNA polymerase sigma factor Sigma-70  
[transcriptional regulator]"  
/protein\_id="gnl|SC|C83\_01575"  
/codon\_start=1

CDS complement(2645..2893)  
/ID=C83\_01576  
/color=1  
/locus\_tag="C83\_01576"  
/note="hypothetical protein"  
/product="hypothetical protein"

/protein\_id="gnl|SC|C83\_01576"  
 /codon\_start=1  
 CDS      complement(2890..3624)  
 /color=8  
 /locus\_tag="C83\_01577"  
 /note="ImmA/IrrE family metallo-endopeptidase, protein  
 motif: Pfam:PF06114.7"  
 /product="ImmA/IrrE family metallo-endopeptidase  
 [pepidase]"  
 /"ID=C83\_01577"  
 /protein\_id="gnl|SC|C83\_01577""  
 /gene="ImmA"  
 /codon\_start=1  
 CDS      complement(3621..3881)  
 /ID=C83\_01578  
 /color=1  
 /locus\_tag="C83\_01578"  
 /note="hypothetical protein"  
 /product="hypothetical protein"  
 /protein\_id="gnl|SC|C83\_01578"  
 /codon\_start=1  
 CDS      4086..4508  
 /color=10  
 /locus\_tag="C83\_01579"  
 /note="Replication initiation protein RepA, similar to AA  
 sequence: UniProtKB:P96631 protein motif: TIGRFAMs:TIGR03070  
 protein motif: Pfam:PF01381.16"  
 /product="Replication initiation protein RepA  
 [replication]"  
 /"ID=C83\_01579"  
 /gene="repA""  
 /protein\_id="gnl|SC|C83\_01579"  
 /codon\_start=1  
 CDS      4569..5078  
 /color=8  
 /locus\_tag="C83\_01580"  
 /note="ImmA/IrrE family metallo-endopeptidase, protein  
 motif: Pfam:PF06114.7"  
 /product="ImmA/IrrE family metallo-endopeptidase  
 [pepidase]"  
 /"ID=C83\_01580"  
 /protein\_id="gnl|SC|C83\_01580""  
 /gene="ImmA"  
 /codon\_start=1



CDS 5089..5415  
 /color=1  
 /locus\_tag="C83\_01581"  
 /note="hypothetical protein, ab initio prediction:Prodigal:2.60"  
 /product="hypothetical protein"  
 /"ID=C83\_01581  
 /protein\_id="gnl|SC|C83\_01581""  
 /codon\_start=1

CDS 5431..5910  
 /color=8  
 /locus\_tag="C83\_01582"  
 /note="Flavodoxin, protein motif:CLUSTERS:PRK07116 protein motif:Pfam:PF12682.1"  
 /product="Flavodoxin [electron transfer]"  
 /"ID=C83\_01582  
 /protein\_id="gnl|SC|C83\_01582""  
 /codon\_start=1

CDS 5926..6633  
 /color=8  
 /locus\_tag="C83\_01583"  
 /eC\_number=1.1.1.100  
 /note="3-oxoacyl-[acyl-carrier-protein] reductase FabG, similar to AA sequence:UniProtKB:Q9KQH7 protein motif:CLUSTERS:PRK05565 protein motif:Cdd:COG3347 protein motif:TIGRFAMs:TIGR01830 protein motif:Pfam:PF00106.19"  
 /product="3-oxoacyl-[acyl-carrier-protein] reductase FabG [oxidoreductase]"  
 /"ID=C83\_01583  
 /gene="fabG""  
 /protein\_id="gnl|SC|C83\_01583"  
 /codon\_start=1

CDS 6646..7689  
 /color=8  
 /locus\_tag="C83\_01584"  
 /eC\_number=3.5.1.-  
 /note="O-acetyl-ADP-ribose deacetylase RNase III inhibitor Macro domain-containing protein, similar to AA sequence:UniProtKB:P0A8D6 protein motif:CLUSTERS:PRK00431 protein motif:Pfam:PF01661.15"  
 /product="O-acetyl-ADP-ribose deacetylase RNase III inhibitor Macro domain-containing protein [hydrolase]"  
 /"ID=C83\_01584  
 /gene="ymdB""

/protein\_id="gnl|SC|C83\_01584"  
 /codon\_start=1  
 CDS 7726..7959  
 /ID=C83\_01585  
 /color=1  
 /locus\_tag="C83\_01585"  
 /note="hypothetical protein"  
 /product="hypothetical protein"  
 /protein\_id="gnl|SC|C83\_01585"  
 /codon\_start=1  
 CDS 8035..8817  
 /color=4  
 /locus\_tag="C83\_01586"  
 /note="Conjugal transfer protein TraX, protein motif:CLUSTERS:PRK13882 protein motif: Pfam:PF05857.5"  
 /product="Conjugal transfer protein TraX [mating pair formation]"  
 /"ID=C83\_01586  
 /protein\_id="gnl|SC|C83\_01586""  
 /gene="traX"  
 /codon\_start=1  
 CDS 8930..10438  
 /color=8  
 /locus\_tag="C83\_01587"  
 /eC\_number=2.7.7.7  
 /note="Nucleotidyltransferase/DNA polymerase involved in DNA repair, similar to AA sequence:UniProtKB:Q47155 protein motif:CLUSTERS:PRK03103 protein motif:Cdd:COG0389 protein motif:Pfam:PF00817.14"  
 /product="DNA methylase Nucleotidyltransferase/DNA polymerase involved in DNA repair impB/mucB/samB family protein [methyltransferase]"  
 /"ID=C83\_01587  
 /protein\_id="gnl|SC|C83\_01587""  
 /codon\_start=1  
 CDS 10435..10842  
 /ID=C83\_01588  
 /color=1  
 /locus\_tag="C83\_01588"  
 /note="hypothetical protein"  
 /product="hypothetical protein"  
 /protein\_id="gnl|SC|C83\_01588"  
 /codon\_start=1  
 CDS 10969..11628

```

/color=1
/locus_tag="C83_01589"
/note="Uncharacterized protein encoded in toxicity
protection region of plasmid R478 contains vWF, protein
motif:Cdd:COG4245"
/product="Uncharacterized protein encoded in toxicity
protection region of plasmid R478 contains vWF domain"
/"ID=C83_01589
/protein_id="gnl|SC|C83_01589""
/codon_start=1
CDS    11625..12287
/color=1
/locus_tag="C83_01590"
/note="Protein of unknown function DUF541-containing
protein, similar to AA sequence:UniProtKB:Q44642 protein
motif:CLUSTERS:PRK11087 protein motif:Pfam:PF04402.8"
/product="Protein of unknown function DUF541-containing
protein"
/"ID=C83_01590
/protein_id="gnl|SC|C83_01590""
/codon_start=1
CDS    12553..12882
/ID=C83_01591
/color=4
/locus_tag="C83_01591"
/note="Plasmid mobilization relaxosome protein MobC"
/product="Plasmid mobilization relaxosome protein MobC
[relaxosome]"
/protein_id="gnl|SC|C83_01591"
/gene="mobC"
/codon_start=1
CDS    12843..14207
/color=4
/locus_tag="C83_01592"
/note="Relaxase/Mobilisation nuclease domain, protein
motif:Pfam:PF03432.8"
/product="Relaxase/Mobilisation nuclease domain
[relaxase]"
/"ID=C83_01592
/protein_id="gnl|SC|C83_01592""
/codon_start=1
CDS    14402..14611
/color=7
/locus_tag="C83_01593"

```

/note="XRE family transcriptional regulator  
 helix-turn-helix domain, protein motif:Cdd:COG3655"  
 /product="XRE family transcriptional regulator  
 helix-turn-helix domain [transcriptional regulator]"  
 /"ID=C83\_01593  
 /protein\_id="gnl|SC|C83\_01593""  
 /codon\_start=1  
 CDS 14684..16585  
 /color=10  
 /locus\_tag="C83\_01594"  
 /note="DEAD/DEAH box helicase family protein Superfamily  
 II DNA/RNA helicase SNF2 family, protein  
 motif:Pfam:PF00176.17"  
 /product="DEAD/DEAH box helicase family protein  
 Superfamily II DNA/RNA helicase SNF2 family [helicase]"  
 /"ID=C83\_01594  
 /protein\_id="gnl|SC|C83\_01594""  
 /codon\_start=1  
 CDS 16618..17526  
 /color=2  
 /locus\_tag="C83\_01595"  
 /eC\_number=2.7.7.-  
 /note="Aminoglycoside 6-adenylyltransferase Streptomycin  
 adenylyltransferase, similar to AA  
 sequence:UniProtKB:P17585 protein motif:Pfam:PF04439.6"  
 /product="Aminoglycoside 6-adenylyltransferase  
 Streptomycin adenylyltransferase [antibiotic resistance]"  
 /"ID=C83\_01595  
 /gene="aadK""  
 /protein\_id="gnl|SC|C83\_01595"  
 /codon\_start=1  
 CDS 17523..18065  
 /color=2  
 /locus\_tag="C83\_01596"  
 /note="streptothricin N-acetyltransferase Sat4 , protein  
 motif:CLUSTERS:PRK10975 protein motif:TIGRFAMs:TIGR01575  
 protein motif:Pfam:PF00583.18"  
 /product="streptothricin N-acetyltransferase Sat4  
 [antibiotic resistance]"  
 /"ID=C83\_01596  
 /protein\_id="gnl|SC|C83\_01596""  
 /gene="sat4"  
 /codon\_start=1  
 CDS 18158..18952

/color=2  
 /locus\_tag="C83\_01597"  
 /eC\_number=2.7.1.95  
 /note="Aminoglycoside 3'-phosphotransferase, similar to AA  
 sequence:UniProtKB:P0A3Y5 protein motif:Cdd:COG3231  
 protein motif:Pfam:PF01636.17"  
 /product="Aminoglycoside 3'-phosphotransferase [antibiotic  
 resistance]"  
 /"ID=C83\_01597  
 /gene="aphA""  
 /protein\_id="gnl|SC|C83\_01597"  
 /codon\_start=1  
 CDS 19228..19800  
 /color=7  
 /locus\_tag="C83\_01598"  
 /note="deoR-like helix-turn-helix domain protein, protein  
 motif:CLUSTERS:PRK11886 protein motif:Pfam:PF08279.6"  
 /product="deoR-like helix-turn-helix domain protein  
 [transcriptional regulator]"  
 /"ID=C83\_01598  
 /protein\_id="gnl|SC|C83\_01598""  
 /codon\_start=1  
 CDS 19824..20375  
 /ID=C83\_01599  
 /color=10  
 /locus\_tag="C83\_01599"  
 /note="DEAD/DEAH box helicase family protein Superfamily  
 II DNA/RNA helicase SNF2 family"  
 /product="DEAD/DEAH box helicase family protein  
 Superfamily II DNA/RNA helicase SNF2 family [helicase]"  
 /protein\_id="gnl|SC|C83\_01599"  
 /codon\_start=1  
 CDS 20506..22044  
 /color=9  
 /locus\_tag="C83\_01600"  
 /note="IS21 family transposase Integrase core domain,  
 protein motif:Cdd:COG4584 protein motif:Pfam:PF00665.20"  
 /product="IS21 family transposase Integrase core domain  
 [DDE recombinase]"  
 /"ID=C83\_01600  
 /protein\_id="gnl|SC|C83\_01600""  
 /codon\_start=1  
 CDS 22038..22784  
 /color=9

/locus\_tag="C83\_01601"  
 /note="IstB-like ATP binding protein putative transposase subunit, protein motif:CLUSTERS:PRK09183 protein motif:Cdd:COG1484 protein motif:TIGRFAMs:TIGR00362 protein motif:Pfam:PF01695.11"  
 /product="IstB-like ATP binding protein putative transposase subunit [ATPase]"  
 /"ID=C83\_01601  
 /protein\_id="gnl|SC|C83\_01601""  
 /codon\_start=1  
 CDS 23026..24258  
 /color=10  
 /locus\_tag="C83\_01602"  
 /note="DEAD/DEAH box helicase family protein Superfamily II DNA/RNA helicase SNF2, protein motif:CLUSTERS:PRK04914 protein motif:Pfam:PF00271.25"  
 /product="DEAD/DEAH box helicase family protein Superfamily II DNA/RNA helicase SNF2 family [helicase]"  
 /"ID=C83\_01602  
 /protein\_id="gnl|SC|C83\_01602""  
 /codon\_start=1  
 CDS 24271..24927  
 /ID=C83\_01603  
 /color=1  
 /locus\_tag="C83\_01603"  
 /note="hypothetical protein DUF4391-containing protein"  
 /product="hypothetical protein DUF4391-containing protein"  
 /protein\_id="gnl|SC|C83\_01603"  
 /codon\_start=1  
 CDS 24924..25745  
 /ID=C83\_01604  
 /color=1  
 /locus\_tag="C83\_01604"  
 /note="hypothetical protein"  
 /product="hypothetical protein"  
 /protein\_id="gnl|SC|C83\_01604"  
 /codon\_start=1  
 CDS 25763..26374  
 /color=8  
 /locus\_tag="C83\_01605"  
 /note="Molecular chaperone Tir, protein motif:Pfam:PF08937.5"  
 /product="Molecular chaperone Tir [chaperone]"

/"ID=C83\_01605  
 /protein\_id="gnl|SC|C83\_01605""  
 /codon\_start=1  
 CDS 26427..27401  
 /ID=C83\_01606  
 /color=1  
 /locus\_tag="C83\_01606"  
 /note="hypothetical protein"  
 /product="hypothetical protein"  
 /protein\_id="gnl|SC|C83\_01606"  
 /codon\_start=1  
 CDS complement(28215..29984)  
 /color=4  
 /locus\_tag="C83\_01607"  
 /note="Antirestriction protein ArdA, protein  
 motif:Cdd:COG4734 protein motif:Pfam:PF07275.5"  
 /product="Antirestriction protein ArdA [anti-restriction  
 modification]"  
 /"ID=C83\_01607  
 /protein\_id="gnl|SC|C83\_01607""  
 /gene="ardA"  
 /codon\_start=1  
 CDS complement(29998..30213)  
 /ID=C83\_01608  
 /color=4  
 /locus\_tag="C83\_01608"  
 /note="Putative tranposon-transfer assisting protein  
 TTRAP"  
 /product="Putative tranposon-transfer assisting protein  
 %28TTRAP%29"  
 /protein\_id="gnl|SC|C83\_01608"  
 /codon\_start=1  
 CDS complement(30215..31408)  
 /color=10  
 /locus\_tag="C83\_01609"  
 /note="DNA mismatch repair protein MutS, protein  
 motif:CLUSTERS:PRK05399 protein motif:TIGRFAMS:TIGR01070  
 protein motif:Pfam:PF01624.14"  
 /product="DNA mismatch repair protein MutS [replication]"  
 /"ID=C83\_01609  
 /protein\_id="gnl|SC|C83\_01609""  
 /codon\_start=1  
 CDS complement(31421..33481)  
 /color=4

```

/locus_tag="C83_01610"
/eC_number=2.7.7.-
/note="DUF3849-containing protein antirestriction
protein, similar to AA sequence:UniProtKB:P27189 protein
motif:Cdd:COG4227 protein motif:Pfam:PF12960.1"
/product="DUF3849-containing protein antirestriction
protein [anti-restriction modification]"
/"ID=C83_01610
/protein_id="gnl|SC|C83_01610""
/codon_start=1
CDS    complement(33493..35562)
/color=10
/locus_tag="C83_01611"
/eC_number=5.99.1.2
/note="Type III DNA topoisomerase, similar to AA
sequence:UniProtKB:P14294 protein motif:CLUSTERS:PRK07726
protein motif:Cdd:COG0550 protein motif:TIGRFAMs:TIGR01056
protein motif:Pfam:PF01131.14"
/product="Type III DNA topoisomerase [topoisomerase]"
/"ID=C83_01611
/protein_id="gnl|SC|C83_01611""
/codon_start=1
CDS    complement(35628..36413)
/ID=C83_01612
/color=8
/locus_tag="C83_01612"
/note="DUF4366-containing protein bacteriocin"
/product="DUF4366-containing protein bacteriocin"
/protein_id="gnl|SC|C83_01612"
/codon_start=1
CDS    complement(36406..36651)
/ID=C83_01613
/color=1
/locus_tag="C83_01613"
/note="DUF4315 family protein"
/product="DUF4315 family protein"
/protein_id="gnl|SC|C83_01613"
/codon_start=1
CDS    complement(36668..38905)
/color=8
/locus_tag="C83_01614"
/eC_number=3.4.-.-
/note="Pepidase M23 Probable endopepidase p60 precursor,
similar to AA sequence:UniProtKB:P21171 protein

```



motif:CLUSTERS:PRK13914 protein motif:Cdd:COG3584 protein  
 motif:Pfam:PF00877.13"  
 /product="Pepidase M23 Probable endopeptidase p60  
 precursor [pepidase]"  
 /"ID=C83\_01614  
 /protein\_id="gnl|SC|C83\_01614""  
 /codon\_start=1  
 CDS     complement(38905..39861)  
 /color=8  
 /locus\_tag="C83\_01615"  
 /eC\_number=2.1.1.113  
 /note="Site-specific adenine/cytosine  
 DNA-methyltransferase, similar to AA  
 sequence:UniProtKB:P11409 protein motif:CLUSTERS:PRK11524  
 protein motif:Cdd:COG2189 protein motif:Pfam:PF01555.12"  
 /product="Site-specific %28adenine/cytosine%29  
 DNA-methyltransferase [methyltransferase]"  
 /"ID=C83\_01615  
 /protein\_id="gnl|SC|C83\_01615""  
 /codon\_start=1  
 CDS     complement(39886..40506)  
 /ID=C83\_01616  
 /color=8  
 /locus\_tag="C83\_01616"  
 /note="Nitrogen fixation protein"  
 /product="Nitrogen fixation protein"  
 /protein\_id="gnl|SC|C83\_01616"  
 /codon\_start=1  
 CDS     complement(40527..42956)  
 /color=4  
 /locus\_tag="C83\_01617"  
 /note="Type IV secretory system protein TraC VirB4,  
 protein motif:Cdd:COG3451 protein motif:TIGRFAMs:TIGR02746  
 protein motif:Pfam:PF12846.1"  
 /product="Type IV secretory system protein TraC VirB4  
 components AAA domain [ATPase mating pair formation]"  
 /"ID=C83\_01617  
 /protein\_id="gnl|SC|C83\_01617""  
 /gene="traC"  
 /codon\_start=1  
 CDS     complement(42922..43305)  
 /color=4  
 /locus\_tag="C83\_01618"  
 /note="PrgI family protein Type IV secretion system,

protein motif: Pfam:PF12666.1"  
 /product="PrgI family protein Type IV secretion system"  
 /ID=C83\_01618  
 /protein\_id="gnl|SC|C83\_01618""  
 /codon\_start=1  
 CDS     complement(43274..43864)  
        /color=8  
        /locus\_tag="C83\_01619"  
        /note="Adenine-specific DNA methyltransferase , protein  
        motif:Cdd:COG4725 protein motif:Pfam:PF05063.8"  
        /product="Adenine-specific DNA methyltransferase  
        [methyltransferase]"  
        /ID=C83\_01619  
        /protein\_id="gnl|SC|C83\_01619""  
        /codon\_start=1  
 CDS     complement(43878..44747)  
        /ID=C83\_01620  
        /color=1  
        /locus\_tag="C83\_01620"  
        /note="hypothetical protein"  
        /product="hypothetical protein"  
        /protein\_id="gnl|SC|C83\_01620"  
        /codon\_start=1  
 CDS     complement(44785..44997)  
        /color=4  
        /locus\_tag="C83\_01621"  
        /note="Conjugal transfer protein, protein  
        motif:Pfam:PF12750.1"  
        /product="Conjugal transfer protein"  
        /ID=C83\_01621  
        /protein\_id="gnl|SC|C83\_01621""  
        /codon\_start=1  
 CDS     complement(45085..45297)  
        /color=4  
        /locus\_tag="C83\_01622"  
        /note="Conjugal transfer protein, protein  
        motif:Pfam:PF12750.1"  
        /product="Conjugal transfer protein"  
        /ID=C83\_01622  
        /protein\_id="gnl|SC|C83\_01622""  
        /codon\_start=1  
 CDS     complement(45420..47207)  
        /color=4  
        /locus\_tag="C83\_01623"

/note="type IV secretion system protein TraG VirD4 components, protein motif:CLUSTERS:PRK13876 protein motif:Cdd:COG3505 protein motif:TIGRFAMs:TIGR02759 protein motif:Pfam:PF02534.8"  
 /product="type IV secretion system protein TraG VirD4 components [coupling protein]"  
 /"ID=C83\_01623  
 /protein\_id="gnl|SC|C83\_01623""  
 /gene="traG"  
 /codon\_start=1  
 CDS complement(47204..47695)  
 /color=4  
 /locus\_tag="C83\_01624"  
 /note="PcfB family protein conjugal transfer protein DUF3801 domain-containing protein, protein motif:Pfam:PF12687.1"  
 /product="PcfB family protein conjugal transfer protein DUF3801 domain-containing protein"  
 /"ID=C83\_01624  
 /protein\_id="gnl|SC|C83\_01624""  
 /codon\_start=1  
 CDS complement(47796..48632)  
 /ID=C83\_01625  
 /color=7  
 /locus\_tag="C83\_01625"  
 /note="helix-turn-helix domain-containing protein"  
 /product="helix-turn-helix domain-containing protein [transcriptional regulator]"  
 /protein\_id="gnl|SC|C83\_01625"  
 /codon\_start=1  
 CDS complement(48637..49413)  
 /color=1  
 /locus\_tag="C83\_01626"  
 /note="Toxin-antitoxin system BRO family toxin Bro phage antirepressor KilAC domain-containing protein, protein motif:Cdd:COG3645 protein motif:Pfam:PF02498.11"  
 /product="Toxin-antitoxin system BRO family toxin Bro phage antirepressor KilAC domain-containing protein"  
 /"ID=C83\_01626  
 /protein\_id="gnl|SC|C83\_01626""  
 /codon\_start=1  
 CDS complement(49397..49645)  
 /ID=C83\_01627  
 /color=1

```

    /locus_tag="C83_01627"
    /note="hypothetical protein"
    /product="hypothetical protein"
    /protein_id="gnl|SC|C83_01627"
    /codon_start=1
CDS     complement(49860..50480)
    /color=7
    /locus_tag="C83_01628"
    /note="helix-turn-helix domain-containing protein, protein
motif: Pfam:PF12728.1"
    /product="helix-turn-helix domain-containing protein
[transcriptional regulator]"
    /ID=C83_01628
    /protein_id="gnl|SC|C83_01628"
    /codon_start=1
CDS     complement(50882..51034)
    /ID=C83_01629
    /color=1
    /locus_tag="C83_01629"
    /note="hypothetical protein:Prodigal:2.60"
    /product="hypothetical protein"
    /protein_id="gnl|SC|C83_01629"
    /codon_start=1

```

BASE COUNT 12860 a 12295 c 12769 g 13110 t

ORIGIN

```

1 ttagttcggg gcaagtccca aaccattgag catcgcgtca gccgaagtca gcttcgagct
61 ataatccaga tgtgcgtaaa tgtttgccgt ggttgagaag tcgctgtgac caagccattc
121 ctgaatctgc tcatgggaa caccgtttgc cagaagtaac gaggcacagc tatgtctcaa
181 gtcgtgatac ctgatgtgtc tcagcccatt tgccttgagc agcttcggaa aacttcagt
241 aacatagtag ggcttgatca gatcaccaat ctcgtttacg caaacataat cgatgtagtc
301 cttgatgtag ctgctgccgc acaagcgacg gttttcctgc ttttcttctt ttagggcgag
361 aagtctttct ctcataaaag gaacaagcgg gacgcttctc atactcgatt tagtcttggt
421 ggtgtcggat gcgaccagaa cgcgcttgcc gtccagggtca caagaagtaa ctgtgtgacg
481 gatggtgacg gtattctgct caaagtcaat agcatccat ttcagaccga ttgcttcact
541 ccggcgcaga ccgtagaatg cgccgaacag aatcggaagc tcaagtttcg ttcctttagc
601 tgcttcgaag agagcgttga cctcatcggc atcataaaag ctgccgacat agcgatcctt
661 cttcgagcgt tcaaccttat ctgccgggtt tacatcaatc aggtcaatct tcacggcata
721 cttgagagcc ttatgaatgt tggcatgata atggatgacc gaggaagcac tgacgcgctg
781 gagctccttc atatagaact cctgaatc ctttgccggtc agattcttga gagtgatctc
841 cttttcacgg aagtacggtg cgacgacct tttgaccgtg gtcgagtaag aagcaaagt
901 cgggactgca accgagcttt tgataatgtc gagccattgt tccatgtagt ccgcaaacg
961 gatgtccccg tcatgacct tcggctcttc gggattgaaa ttgcgtcgcg catccatcag
1021 gattgcttcg ggcgctttt tgtttccctt aacagtaagt ccggtagaaa tccacttggt
1081 ctttctttt cggagagaat cgggtgtagt caacacggcg taataatc ctttttttc

```

1141 gcggagatgt cctgctacca tatattatcc tccttcttgc gtagcagtaa cacctacctt  
1201 ataccgggat cctattatac cagaaccggg ttcgaattgg aggacctact gacgactat  
1261 tttgtaaact tttgagtc aaatcttacg cgttcactgt ttctccgag ccgatgcaga  
1321 gataagtga aagatgagcc ttcggaatac gataggctct gccgaccttg aggctaagga  
1381 tttgacctc gcgaaaata cgatagccgg tctttgtgct gatgctgagt atttcacaca  
1441 tctgctcaat gctcatcaca tcgggatagt ctttcagcat gagcttatag gcatcgcgct  
1501 gagaaatggt tgatgcggtta ttcacctgtc tcacctcctt ttatttgttt ttgctttatc  
1561 agcaaaagga taggcagcag tcggttgaca actgctgccc atagtttttg atgataaatt  
1621 gtgtccagc atatttgagc ctgcacccc tgctgaatag ggaatgctgc ggactaccac  
1681 cggtaaagca gtatcatggg actctcacc ctcgaggat cgctccgagc cgcccttca  
1741 aagaagaaac ggaagtatca ttgtaccaa cttctccatc atcgcaagca gccgcaccac  
1801 acggctggtt agtctctctg ttgatcgtc actcctgtat gggaggctat ggcggcagaa  
1861 gacaagtgc ttcgagaaaa gaggaaagat ccgagcact gactattcag tttcaagga  
1921 accgtgcagc ggcgattaag cctcttcaa atacaacgga catttttcat cagtttttg  
1981 gggctcctt aaaaaatatt tttgctttt tctgaacatc tctctggct tcaaaaacag  
2041 tagagacatc aattccacga gccttgctgt aatccgtcat gctcatgccg ccgagcaagc  
2101 agtagaggta aacttcgagc tggcgttcg tcaagagcaa gcggaactcc tgctcataa  
2161 cggaagtgag aactgtttct tcaaactgt tcgggtctc cagccaagca ggactcatc  
2221 cttctgcatc ctgcacactg acaaaatcaa gcgaaagaag agttgccgtc tcctcctcat  
2281 cctcgaacc ggcaataggt actccggtct tagagcgtct gagcttttt tctcgttgc  
2341 ggagaactct catggtttct ctgctgacct cgcatactc gccggtgagc ttcacgcgca  
2401 ccatgcactt gccttctcc gtagtcaga gatcgtatc aaattcgata ggggttttca  
2461 ttgtcttgc ctttccgctg gcgcgagca gcggaaggac gagacaaaat aagagccgca  
2521 tgacggtgag tttgaatccc atgccgataa aacagagtcc gaaaactctg tcatgcggc  
2581 attaggaaga ctaccaatc agcggctcca cagcacagca atcatattgt tttgttgat  
2641 gttattatct ccggcctttc agacggagtt ttaaccttct catgctgagg acatcaaaga  
2701 ctgtctcacg ccacaagcc tgcattttg ctggacatg gccttttggt tcctcaaata  
2761 cggcgatgga attatgccc caatagggg atttcatcat gcgcatctc tgatttgta  
2821 tggcgcgtc gcaccttgt atctttacct gcatttccg cgagggctc gaaacccgga  
2881 tgcttctgct catggccaca cctcaacgg atcgtcatal tccgcaaagg ggcggtctc  
2941 gatgtagccg agttgcctca gccgaataat ggctcggac ttgaaactc cgagagactg  
3001 gcacagcaga gttaggata aacaatcaat ataattaa cttccctcgt agttcctgag  
3061 gacacggcca cgggcaaatt gcctcatggc aatgtcgatt tcctttggg gcatcagaat  
3121 ggacgacct aacacattag ctgaccatc attccaatcc tcgcggtct tgagatcacg  
3181 gagcgaatat gccgctctgg gggcatatt gcttctgtc gttctctt cattatcgt  
3241 ttccatccc aacaggattt gatgagcga ttcattggca aggttaaate tgcgctccc  
3301 gcacaaagca tgaacctgtc caggctgaat aaagctcaa tcaaaaagaa cctgatttgc  
3361 tttcagcggg attgtccgct taatgccgtg ttctctatg gtgtactctg taccggcata  
3421 agcagtcagc ccacatagc ttcgctcaga ggatagatgc gcaaatgaaa cgctcaagcc  
3481 gagataatcc ttggcaaact ggtcaatcgg tctcgcctga gcagttgacc tctcattgtc  
3541 atcgtcttt ccgaaaaga actcattgaa gtccttggc acggctgcc ctatttctc  
3601 gatctgctta tgggatagaa tcacgagcag cctcctttg cttctacgaa ccatttgc  
3661 cttcatgaa acagaaacga ctctttct ctgatcaata cgggtgagc aataccgccg  
3721 cctcccactt ttttagaggt tgcgcccac ttatacaaga ctttctgat ctggaagatg

3781 agtccgtcct tccagcggat gaagcatgga tgaatagtgc cttcctcatc cacatcaaca  
3841 ttaaccgaaa catacgcttt tctgactga gcgttattca taaccagcct cggtcataa  
3901 aaaagtact taaaagcacg aacattattt catgctcctg ttgacacaca ccctttcgtg  
3961 tggatcata tagacgaaca tagtttcgtg ctgtgtgatc attataccgc gaacagtgtt  
4021 tcgctcaat aggttttaac gaaaaagtgt tcgtgttcat gaaaaattaa agaaagaggt  
4081 gccttatggg tttcaaagag cgactgaaag aaaaaaggat tgaagccggt ctgactcagg  
4141 tagaactcgc taagaaagcc ggagttacag cgcgtacaat tcagaattat gaacttgaa  
4201 gcccaagcc cgtccacatg gaggttggtc agaaaattgc agatgctctc ggaactacca  
4261 cagaatactt gctgggcagc agcggagctt atgtcgtga tgcttatgaa aagggcggg  
4321 cgaaagcagc cagagatatt gacgagttgg taggtgaagt gaccggcctt ttcgccggg  
4381 gcagtttgag tgaagaggct ttggaagggt caatgaaagc actcaatgat gcctattgga  
4441 tcgcaaagc gaaaaataag aagtacgctc ccaagaagta tcggaagagc gatgagccag  
4501 cggataagt ccgttctggt ggacacctt tctgctatac ttttattcc acgaatggag  
4561 gtggaacgat gactgctga tacctctcga aagtaggcaa cgacctgta aatcgttgcg  
4621 gaacacgaga tcctttcgc attgcacatg agctgggcat tgaagtcctt ttctgcaag  
4681 actttggcc cctcaaggga atgtatagag taatcaaagc caatcgctt attttcatca  
4741 ataaggattt gagtctcgt atgcagacga ttgtctcgc acacgaaatc gggcatgatc  
4801 agttgcaccg gagcatggca aagaatgac ctattcaaga gttcatgctg tacgacatgg  
4861 caacaaagcc ggagtatgag gcgaacatcg tagccgctga aatcttgctt gatactgata  
4921 ccacctcga atacatctat gactacggct atacctcga gcagattgag cgagctatgt  
4981 atacagacat aaacttagtc gctttgaagg tggcgcactt ggctgagacc ggatatgacc  
5041 ttcgccgatg tgaccatcgg agcgaactcc tgaataaagg aggatgctat gaccaaacc  
5101 gaagtcatga aggactttt gaaaaaaca gtgtgccgg ttgtcgtggc actgctgctg  
5161 ttctcaattt tcagccgat tttcattgag aatggcacac cgaattattt tctaactg  
5221 cttgcttgcg gactgccgtt tggcatcggg aagatgttca cactgattcc gttggttt  
5281 ggcatctccg gtacagttgg cgttgttgcg ctcaacatcg ttcttgagg attgatcggc  
5341 ggagtgatcc tgatttacag acttgacgtg gcagtttggg atctgccct gacgatatac  
5401 aggcttattg cctgagaaac gaggaaaaca atgagcagaa aacttgagg atactttcc  
5461 gcatccggca cgacagcaa agtagccgaa acattggctg agccatcgg tgcgataata  
5521 tacgaaatcg aaccggcggc accttacagc aaggctgatc ttgactggac aatcagaaa  
5581 tcccgaagca gcattgagat gagcagatca gcataccgtc ctgctatcgc cgtaagcgt  
5641 gacaacatgg atgactatga caccgtattt gtcgggttcc cgatttggg gtatgtggc  
5701 cccatataca tcaacacctt cctgaaagc tatgacctga ccggcaaagc cattattccc  
5761 tttgctacct ccggcgggag cggcatggga gaaaccaatg aaaaactcca accgagctgc  
5821 ccaaactcca aactgataga gggaaagggt ttcaaggcgc actcaagtaa agctgagatt  
5881 accgcatggg cagacgctct tgagtactga ttgaggtaa ggcgaatgga tttgaaaac  
5941 aaagtcgtag ttataacagg cggcgtctat ggtatcggca aagcgattgc cgagtcgtc  
6001 cgcagtgggg ggcacatcag tgaattatt gacatcgcac cgggagatca ctacatcga  
6061 gacatcagca gaaaagaaac attagaggcg ttgcttct atgttctgga taagcatggt  
6121 catgtggact acctgatcaa caatgctctt ccgtaatga agggaatttc cgaatgctcc  
6181 tatgaagagt ttcatgatgc cttgtctgc ggtgtcacag ctcccttcta tctcagcaag  
6241 ctctttctg agcattttgg caaggcggc gttatcatca atattcttc atccagagat  
6301 cggatgagtc agcccgagc cgaaagctat acagcgcca aggggtggtat tgcggcgtg  
6361 accatgctc ttgcatgac cttctctgga aaactctg tcaattccat tttcccggc

6421 tggattgata cggaataccg cgaatacagag ggagcggatg ccgttcagca accgtcagga  
6481 cgggttgaa acccgatgga tattgcaaat atggtcttat tcctctgctc tgaaaaggcc  
6541 gggtttatca ccggagagaa tatctgcatt gacggtgga tgacgaagca gatgatctat  
6601 catggagatc atggttgaa gctggaaata taggaggaac aaagtatgcc tcttcatatc  
6661 gtcagaaatg acatcacaaa aatgaaagt gacgcaatcg tcaacgctgc caactcatcg  
6721 cttctgggcg gtggtggtgt tgacggctgc atccatcgtg ctgcaggacc ggagctgttg  
6781 gctgaatgta aatgctggg cggatgtgaa accggcagcg ccaagatcac gaagggtat  
6841 aagctgccct gtaagtatgt gatccatgct gtaggtcccc gctggcggga tggcaagcgt  
6901 ggtgagcag ataagctcat ctctgttat cagacttctc ttgctctggc aagggaaac  
6961 aatgcbgaga cagttgcatt cccgttgatc tcttccgta tttttggcta tccaaaagac  
7021 caggcactca gaattgccat tgatacgatc agcaggttc tgcttgaana cgatatgacc  
7081 gtctacatcg tcatcttga caggaaggca tatcagatca gcgggaagct ctatcggat  
7141 attgccgagt acatagacga taactatgta gacgagcatt ctgacaacta ttctgcgctg  
7201 ctgcccgggt tgaatgcact tcgggatatg gagccggtt gcgaagcgtc ggtctgtgaa  
7261 gaagccgacg aagcgattga gcctatctg tctatgcaa tggcagcgc taagaagaca  
7321 aatctctgg atgaggcgt gggcagatt gatgagagct tttctgagat gctgctgctc  
7381 aagatcgacg agaaaggtat gacggacgca cagtgtata agaaagcaa cattgaccgt  
7441 aagctctct cgaagatccg gtcggacaag ctctataagc cgagcaagcc tacggctatt  
7501 gcctttgcta ttgccttga gctgtcttg gatgagacga aggatattct tatgaaggcg  
7561 ggctttgctc tgtctcatt caataagtt gacatcatta ttgagtatt catagagaat  
7621 gaaaactaca atgtcttga aataaacgag gctctgttcg cgttcgatca gagtttgcct  
7681 ggagcataag agaaagaca atcggaatt gtagaggatg atttttgga cagagcaata  
7741 ttaaaagaac ttggctcag aagcaggaat gaggctctgg cttttctgaa aaaaatag  
7801 agacaggaga aggcggaatg tccaatatgc ggacgtgac tggaaactgct gcataaaaag  
7861 gcgaaaaga ataattgta ttggcagtg aagaattgta ataaaacta taaaaccatt  
7921 cacttactgg atgaaattaa tgagcagatg ccagattaac aactccagt ttggagaggc  
7981 aactttcac cgaaagagga tgaatacaaa aagttcaagg aggaaatctc tgtcatgag  
8041 ttaattcgta tatttacc aagcaatca tctcaacaaa aaaatggaac tttcagggt  
8101 atcagttct ttactaca tatcatcgt atgcttcta tgctgtgca ccatcttgg  
8161 gcgactgtt tttccgata cgcttgctt acctgggtg gcaggctgc ttaccatc  
8221 tttgcctta tgctgtgga gggctattc cacaccgca atttgaaaa gtatatggga  
8281 cggctgctt tttggcaat cctctccga ctgccctca atctgatgta cggagcagc  
8341 ctgatctat cctccatca aatgtactt tggacattcc tgttgggact tttgttatt  
8401 accgcattg aaaaaacgc ccaaaagga aagcctctgc tgacgatgat cgtcttttg  
8461 cttcagcag ccgaggcta tgtgctgggt ttcttgcta tggtagatta tttggatg  
8521 ggaatatgga tggactgct tttctacctg ttccgtgta gaaatggtg gtccttctg  
8581 ggacaattg ttgactgtg ctggattaac gcggtgtaa tcggaggct ctccgtccg  
8641 gtacaaatct ttggcacga agtatttatt gtgcaacagt caatggcatg tctggcctc  
8701 atccccatc ggctgtaca ggggaaacag ggaccgata acaaaatcat ccaaccgt  
8761 tttacgct tttatccagt gcatatgctg attctttcac tggcagcact tctgtagcg  
8821 cagcttgc cggaccatt ctcaaaaaac tcttaccgct catcaaat cttataaaa  
8881 ttctgttg taaaactgat atggtgat gaaaggaggc caccggagca tgaagagcg  
8941 cacatacat gcaatcgacc tcaagagctt ttatgctc gtggaatgcc gggagcgg  
9001 cttgatccg ctggacacaa acctgtgtg cgcagacga agccgtacc acaagaccat

9061 ctgcctcgca gttacaccct ctctcaagtc ctacggcatt tcaggccgtg gccgtttgtt  
9121 tgaggttaag cagcgagtta aagaggccaa cgccggacgg cagcatgacg ctccgggaca  
9181 caagctggaa ggttcctct gcttccattc tgaacttctt aaaaaccaa acctcgcat  
9241 tgacttcgtt atcgccccgc cacgcatggc ctattacatg gaatacagca cccggattta  
9301 caatgtctac ttgaagtatg ttgcatcgga ggacatcatc gtatattcca tcgacgaagt  
9361 gttcatggat gtcactgact atctgaacac ctataagctg tctccccacg acctcgcaat  
9421 gaagattatt ctggatgttc ttgagacaac cggcattaca gcaaccgacg ggatcggcac  
9481 aaacctttt ctctgtaaag tggctatgga tattgtggca aaacacatcc cggcagataa  
9541 gaacggggta cgcacgcag agctggacga aatgggattc cggcgggagc tttggtcaca  
9601 tcagcccctc actgacttct ggcggtggg gcgcggtat gctaagaagc tggaacagaa  
9661 cggaatgttc acgatggcg atgtggcacg atgctctgtt caaatgaag acattctgta  
9721 ccagctctt ggaaagaatg cggagctgct gattgacat gcgtggggct gggagcctt  
9781 tacggttga gcaattaagg catacaggcc gactacaaac agcctcggct caggtcaagt  
9841 gctgcatcag ccatatactg ctgagaaagc caagctcgtg cttcgggaaa tggccgattc  
9901 gcttgtgatg gacttgggtg aaaaaggctt ggtcacagac cagctcgttgc tcaccatcgg  
9961 ctacgacatc gaaaacctta ccgatcccga gcgccgaaag aaatatcgcg gcatattgt  
10021 gaaggatcac tacgggaggc agataccgaa acacgctcac ggactgcca acctgacgg  
10081 tcacacatca tctacgaaga aaataatgtg tgctgcgta gaactcttg accggatcgt  
10141 cgataagaac cttctcgtgc gacggtgaa catcgtcga aacatgtgc taccgaagc  
10201 agatgcaccg aggaaaaacg ccggtttga acaactgac ctctcacgg actatgcagc  
10261 tcttgaggta aagcaggagc aggaacgcgc cgagcttgag cgtgaaaaga aatgcagca  
10321 agccatgttg accatcaaga aaaagttcgg aaagaacgct atcctcaagg gcatgaactt  
10381 ggaggaaggc gcgacggcta aggatcgca cgcgcagatc ggaggacaca aagcatgagt  
10441 gaaaactacg atgatataat cgatcttct catcatgttt ctgcaaccg gccgcagatg  
10501 tccatgatgg atcgtgcagc acagtttct ccattcgcg ctctaccgg ttatgatgcc  
10561 gccatcaagg aaaccgag gctgaccgat cagaaaattg aactcgacga ctacgagaag  
10621 gaagaaatca acggcaaat ccagctcatt gcagagcatc ttggcgagga tttgaagt  
10681 gtgattacct actttcagct ggacggcaag aaggccggag gcgctatgt ggatgcgctg  
10741 ggtgtcgtaa agaaaatcga cgaatacag aggatgatcg tttccggga aggcagaaaa  
10801 gtctcgattg atgacattct tgaatcaag ctggctgagt aattgtcgt tgccatgca  
10861 ccaaccgaa tatgatttt ctataatat gactgtaagg taaacaaccg agcagtcata  
10921 tttgtttt ggctgaaagc caaaaacgat atacaggagg tactgaacat gagaaagaac  
10981 ctaactgaga tcgtattcat tctgaccga agcggctcta tgagtgggct tgaggcagat  
11041 actatcgggg gcttcaactc catgattgag aagcagaaaa aggctgaggc gaagctctc  
11101 atctccaccg tctcttca caacgcaagc gaggttattc atgaccgtgt ggggtttcag  
11161 aacatcaagc ccatgaccga tgaggactat acagtacgag gctgcaccgc ctttctggat  
11221 gctgtcggcg gagcaatcca ccacatcgga aatgtcata agtacgcacg agctgaggat  
11281 gtaccggagc atacgatgtt cgtcatcacg actgacggaa tggagaatgc aagccgccg  
11341 tatgacagcg ataaggtcaa gaaaatgatc gagcgtcaga aggaaaagta cggctgggag  
11401 tttctgttc tcggcgcga cattgacgca gttgagacgg cacgacactt cggtatcagt  
11461 gaggaccgct ctgtgaacta tcattctgac agcgaaggca cacagctcaa ctacgaggtt  
11521 gtcagcgagg ctatctgtgc tgtccggtgc aacgcacctc tcggtgccga ttggaaaaag  
11581 cgcacgcagc aagactaca cgcaagaaag gatggcgaa gaaaatgatg aggacaatta  
11641 ctgttcgagg cgttgaaat gtatcagca gaccggacta cataaccatc tcaatgacca



11701 tagagtctat ccgaaaagac tatgacgggg caatgcgaga tgcctctgag cgtatatcga  
11761 aattgcagga tgtggctgtt cgttcgggg atgcaaagga ggacttgaag accaccagct  
11821 tcaatgtaga taccgatat gagagcgtca aggatcggca aggcaactac aagagagagt  
11881 tcgccggata tgcctgtgta tatcgtctca agctgtcttt cgactttgac agcaagcagc  
11941 ttgcgaaagt gatttccgct atcgccaaca gtggagcaaa tcccgaattg agcatcgcgt  
12001 tcacggtgag aaatccagca aaggctcagtg cagaacttct ggaaagtgtc gcgctcaatg  
12061 cacgagcaaa ggctgagatt ctatgcagag cgtcgggcag cgagatggga caacttctct  
12121 ctatcgacta taactggggg gaactgaaca tcgtctcgcg cacaagctac gaaatggaa  
12181 actgctcat gcctcttga gcaatggaaa aatgctgttc acctgagatt gagcctgatg  
12241 acattgatgt atcagacacg gttgccttca catgggagat taagtaatta ccatatcgtc  
12301 ggagaaagac gctttcgggc gtctttttc gtgtccaacc ccaaaaaacc attggctttt  
12361 gtccgttga ttacgaaggg gtattttacg gggagtcctt acgggggaat acgattttag  
12421 agaatagcaa gcaaatccgg tgagtacca cggagaaaa aagcgttaag ggaaccctcc  
12481 ccttaaccgc tgatttttgc ttgtgggat agtcccaaac cttataaat tacgaagaac  
12541 ggagacagaa cgatggcaaa cagaacgcgg aaagtgcagc tcaagttctg ggtcaccgag  
12601 gaagaacggg cgatcataga gcggaaaatg gagatgctga aaacgaagaa tatgggagcc  
12661 tatctcgcga agatggcaat agatggctat atcattcagg tagactatac cgagcagaaa  
12721 aaactcgtc cggcagtcaa taagatcgga gcaaacatta acaatatctg ccgaaggatg  
12781 aactcaacgg gacgattcta tcaggacgat gttgttgagc tgaaaggaaa gctggatgaa  
12841 gtatggcagt tactaagatc aaagcaatcc gaggaacttt gaacaaggct cttgcgtaca  
12901 tcatgaatcc tgagaagacc gatgataaaa tgctgtctc ttctatgga tgtgccgctg  
12961 agacagcggc tcaggaattt gaatggacgc gaaaaattgc cgagcagcaa gggatgaatc  
13021 ccgtcaaaat tattgcccg catgtcatcc agtcccttga tgttggcgag gtctcggcg  
13081 agcttgccca tgagatcggc aagcagtttg cggatgaaat cctcgcggg aagtatgagt  
13141 atgtgctgac cacccatatt gataaagacc atgttcataa tcacctgatt ttcaatgccg  
13201 tggactttgt ggatcatcac gcatacaaga gttacaagaa aatctactat gatatgcgcg  
13261 aggcaagtga cggctctgc aaagaaaacg gtctctccgt aattctccc tctcagggca  
13321 agggcatgag ctataaagag tacaccgagg ccaagcgagg aacaagctgg aaacaaaagc  
13381 tcaagcagac cattgaccga aagatcatca cggcaaagga ctacgatgag ttctgaaac  
13441 tgatgcagga tgccggatat gaaattaa cggcaaata catctcctc cgagccgaag  
13501 gccaggagcg tttcacacga gcaaaaacca tcggagagaa ctacaccgaa gaacgatca  
13561 aggaacgcat tcaggacac aatccccgaa agcgtcagat gcagactacc cgcaaagggtg  
13621 tctcgttat cattgatatt cagaacagca tcaaggctca ggaaagcaag ggatatgaa  
13681 actgggagaa gatcaacaat ctcaaagaag ctgcgaaaac gctcaactat cttactgaaa  
13741 acaatctct gcaatatgcc gatcttgaga aaaaggttga ggacattcac agctcctatg  
13801 cccgtaccgg tgaagagctg aaaagggttg aagccaggct tcgggaggtg cagcctctca  
13861 tcaaaaacat cgcaaatat cgcaagctca agcctgtcta tgatgcctat atgaaagcaa  
13921 aagataagtc tgctttccga gctaaacatg aagctgaact tgtaattttc gaggctgcga  
13981 agactacgct acttgcaatg caaggcgacc aaaaactgcc aagcctcaaa gctttccaag  
14041 ccgaacagca aaggcttact gatgagcaac aaaggctata tgatgagcgg gcaaggttga  
14101 aaagagaaat gaagcagata gataccatta aggccaatgt ggatagctg ctccgaattg  
14161 atgaagatca ggagcaaaaga caggagcgtt ctctcagcg cgagtaacc aagcgggtct  
14221 gactgtttg atgtcaggcc cgcttttata tgcgtagatt gtggataaaa ggggcagtcc  
14281 aagaagttg aactttttg ttaatcctta gagcatccga ttgaaaagat cgactatttc

14341 tgctataata taaactgatt cttatatca gcttacagat gtaaatgcaa gaggtgctta  
14401 tatgaagatc agttacaaaa aactttggat gcttctcatc cagcgagaca ttacaaaggt  
14461 caggatgaaa agagatttag gtcttgctgc cggaacaatg agtaagctca acaagggcga  
14521 ggatgttgcc ctctctgtcc tgctgcgcat ttgtgagtat ctggattgtg acatcgggga  
14581 tatttgcgaa gctgtgagag cgggaaactg agtcccgttt ttcgtacagc ctttatgcta  
14641 taatttggga ttggagacgg ttgtgtctca atgaggtgat gaaatgcaga ttattgataa  
14701 cataaacaag accgtcaagg acgatctgca agtgggtatt cataaaggca gtaagatgtc  
14761 cgttgccgcc gcttgctttt caatctatgc gtatcaggaa ctcaaaaagc agcttgaggg  
14821 cattgacgag ctacgtttca ttttcacctc gccgacattt gtaaccgaga aaacatcaaa  
14881 ggcgcagcgg gagttctata ttctctgcat ttcaagagaa agcagtctgt atggcactga  
14941 gtttgaagta aaactccgca atgagctgac ccaaaaagcg atcgccaagg agtgtgcgga  
15001 ctggatcaga cgtaaggcgg ttttcaaatc gaacgtcaca caggagcaaa tgatgggctt  
15061 catgacggtc gatgaaagca cctatatgcc gatcaatgga ttcaccactg tcgatcttgg  
15121 ctgtgagcgc ggcaacaacg cctattatcc agtgcagaag actgagagct ttgagaacgc  
15181 caactacttt ctgggacttt ttgaacaact ctggaatgac aagaaaaagc tgcaagaagt  
15241 cacggatatt gtgattgaga atatctccgc cgcgtatcgt gagaacgcac cggagtatat  
15301 ctattttgtc gcgctctata acatcttcaa agagttcctt gatgatgttt cggaggacga  
15361 gctgccaat gaagcaacgg gctttaagga aagcaaaatc tgggggatgc tttacaactt  
15421 ccagcgtgac gctgttctcg ccatcatcag taagcttgag aaattcaacg gctgtattct  
15481 tgctgatagc gtcggtcttg gcaaaacttt tactgctcgc gcggtcatca agtattatga  
15541 gaaccgcaac aaatccgttc ttgttctctg cccgaaaaag ttgtctgaga actggaatac  
15601 atacaaaggc aactatatca acaatcccat tgcggcggac cggctgctt atgacgttct  
15661 ctatcacacc gaccttccc gcgagcatgg gctgtcaaac ggaattgacc ttgaccgctt  
15721 gaattggggc aactacgacc ttgttctcat tgatgaaagt cacaacttcc gtaacggcgg  
15781 tgaggtgtcc ggcgaggatg caaaagaaaa ccgctatctg aaactgtca acaagtcgt  
15841 tcgcccgggt gtaaaaacca aggttctgat gctttccgca acgcccgtca ataacaagtt  
15901 tattgacctt aaaaatcagc ttgacttgc ctatgagggc gatgcatcgc agatgaacaa  
15961 aaagctcgat acaacgaaga gcattgatga aattttccgt caggcacaga aggcttcaa  
16021 cgcatggagt aagctccctg ccgatgaacg cacaacggac gagcttctgc ggactctgga  
16081 ttttgatttc ttgaaactc tggacagtgt gacgattgcc cgttcgagaa aacacatcga  
16141 aaagtattac aacacctccg acattgggaa atttccggag cgtctgccgc cgatttact  
16201 gcgtccctgc ctgaccgact tgaacgatgc gatcaactat aacgacattt acagtctgct  
16261 catgtcactg agcttgacaa tctatagcc ttcgaattac atcatgccgt cgaagctggc  
16321 aaagtacatc gacatgacac accaccaagg aaacagcttg accagcaag gacgtgagga  
16381 aggtattcgc gccttatga gcattaactt taaaaatat catagaacac tgaccacata  
16441 tctaaataca ctgcttcaa atagttttat aataaatcag atttggagc cacagccgcc  
16501 agagaacatg atggatattc cggggatggc ggatgaaatg cgacgcccaa tgatgctgat  
16561 tgtatcggca aaaaagaaga tgtaataata tagaaaaaat aaacgaggag tatgtaaag  
16621 agatcagaaa aagaaatgat ggatttagta ctttctttag cagaacagga tgaacgtatt  
16681 cgaattgtga cccttgaggg gtcacgcgca aatattaata tacctaaaga tgaattcag  
16741 gattatgata ttacatattt tgtaagtat atagaaccgt ttatatctaa tgatgactgg  
16801 cttaatcaat ttgggaatat aataatgatg caaaagccgg aggatatgga attattccca  
16861 cctgaagaaa agggatttct ctatcttatg ctatttgatg attacaataa aattgatctt  
16921 accttattgc ccttgaaga gttagataat tacctaaagg gcgataaatt aataaaggtt

16981 ctaattgata aagattgtag aattaaagg gacatagttc cgactgatat agattatcat  
17041 gtaagaaagc caagcgcaag ggagtatgat gattgctgca atgaatttg gaatgtaaca  
17101 ccttatgta ttaaaggatt gtgccgtaag gaaattttat ttgctattga tcattttaat  
17161 cagattgttc gccatgagct gctgagaatg atatcatgga aggtcggcat cgaaacaggc  
17221 tttaaattaa gttaggcaa gaactataag tttattgaaa ggtatatac cgaggattg  
17281 tgggagaaac tttgtccac ctaccggatg gattcctatg aaaacatatg ggaagcatta  
17341 tttctatgcc atcaattgtt cagggcgga tccggtgagg tggcggaag gcttcattat  
17401 gcctatccgg agtatgatag gaatataaca aatatacca gggacatgta taaaaaac  
17461 actgtaaaa cggctgcct ggatagcaca tatgccgctg atatagaaga gaggcgggaa  
17521 cagtgattac agaaatgaaa gcagggcacc tgaaagatat cgataaaccc agcgaacct  
17581 ttgaggatg aggtaagatt ataccgaggt atgaaaacga gaattggacc ttacagaat  
17641 tactctatga agcccatat taaaaagct accaagacga agaggatgaa gaggatgagg  
17701 aggcagattg cttgaatat attgacaata ctgataagat aatatactt tactaccaag  
17761 acgataaatg cgtcggaaaa gttaaactgc gaaaaattg gaaccggtac gcttatatag  
17821 aagatatcgc cgtatgtaag gatttcaggg ggcaaggcat aggcagcgcg cttatcaata  
17881 tatctataga atgggcaaag cataaaaact tgcattggact aatgcttga acccaggaca  
17941 ataacttat agcttgtaaa ttctatcata attgtggtt caaaatcggc tccgtcgata  
18001 ctatgtata cgccaactt gaaaacaact ttgaaaaagc tgtttctgg tatttaaggt  
18061 ttagaatgc aaggaacagt gaattggagt tcgtctgtt ataattagct tcttgggta  
18121 tctttaaata ctgtagaaaa gaggaaggaa ataataaatg gctaaatga gaatatcacc  
18181 ggaattgaaa aaactgatc gaaaaataccg ctgcgtaaaa gatacggag gaattgtccc  
18241 tgctaaggta tataagctgg tgggagaaaa tgaaaaccta tatttaaaa tgacggacag  
18301 ccggtataaa gggaccact atgatgtgga acgggaaaag gacatgatc tatggctgga  
18361 aggaaagctg cctgttcaa aggtcctgca cttgaaacgg catgatggct ggagcaatct  
18421 gctcatgagt gaggccgat gcgtccttg ctggaagag tatgaagatg acaaagccc  
18481 tgaaaagatt atcgagctgt atcgaggatg catcaggctc tttactcca tcgacatc  
18541 ggattgtccc tatacgaata gcttagacag ccgcttagcc gaattggatt actactgaa  
18601 taacgatctg gccgatgtg attgcgaaaa ctgggaagaa gacactccat ttaaagatcc  
18661 gcgcgagctg tatgatttt taaagacgga aaagccgaa gaggaactg tctttcca  
18721 cggcgacctg ggagacagca acatctttg gaaagatggc aaagtaagt gctttattga  
18781 tcttgggaga agcggcaggg cggacaagt gtatgacatt gccttctgcg tccggtcgt  
18841 cagggaggat atcggggaag aacagtatgt cgagctattt ttgacttac tgggatca  
18901 gcctgattgg gagaaaataa aatattatat ttactggat gaattgttt agtacctaga  
18961 tttgatgtc taaaagctt taactacaag ctttttagac atctaactt tctgaagta  
19021 catccgaac tgtcatact ctgatgttt atatctttc taaaagttc ctgatagag  
19081 ttctatatta gagatgtaa gagtttggg gaagagggtt gtgagtatgg ctttataac  
19141 caggtgcaa tgagaagcac taacagcagc tagcttaaga acgcatagga tatactttt  
19201 atggaagtca cagaggagga ataaaattg aacaggatta acagagtaac ctctattct  
19261 atcagctgc aatcaaaaa aataattcct gccaaagaaa ttgcacagcg attaatata  
19321 agcttaagga cagtttacag agatatccg aacttgaag aagccggaat accaattgga  
19381 tctgagccg gaaaaggata tttcttgta gaggcttc tactccgcc ggtaattgtt  
19441 acagcggcgg aagtgggtg attgattaca gcagggaat tttaaattg ccatggagat  
19501 gaatcattt taaaggatt tgattcagct atgtataaaa tcaaatctat ttgagcat  
19561 ggtgaaaaa actatgcaca ggagttggag aacagtatta acgtgtacag cacatctgga

19621 cagaaaaata cattggcggga taacgttatt gcagcaattc agactgcaat ctgcaataaa  
19681 agggtaatat caattcaata tcctgcatca ggagggcaag aaccggaaag cagaatgata  
19741 gagcctatat cactgggggtt ttatgaacag aactgggtact taatcggttt tgcaggctaa  
19801 gaaatgaata taggaatfff cgtgtggatc ggattaaaag catttgcata gaagaagagc  
19861 tctgtcaaag ccatgatggc tctttggaac aatatataa acaaatgctt tcatataaaa  
19921 aactatataa tgtaattctt agagctgaaa aaggggagac atacaattct atcaagaaca  
19981 ggttgctcaa gcgtctggaa agctcggttg cctctttccg tctgacgata gaccgcatta  
20041 aaaagttgat caacgatacg attgagacaa tcaaaaatta tcagaccgga gactgtgttc  
20101 tgaatctgac cgagatttcc ggcacagaag attttgatta cgacgatcag aacctgatt  
20161 tcttctccgt cggcaagaag gttaaaattg acctcactga tatggactat gtttcatgga  
20221 tgcgcgagct ggaaaaggat gcggagaatc tggaactcct gtcctcatg attgccgaca  
20281 tcacgccgga gcatgacacg aaactgcaaa cattgtttga tttaatccgg aagaaaatcg  
20341 agcatcccat caatgagat tccgccgag attgagcacc tcgaccgggc aaattgagca  
20401 ccttcaccgg cggaaattgag cacggacgcc gcagccgttg agcagcacgg taaaatgtag  
20461 atatgtacc ttcaggggtgc aaattctaca aggaggtaa ccaatatgac caatcacctg  
20521 gagattctca ggttgacag cctgggactc acaaaaaccg agattgcggc cagtttac  
20581 tgcgctcgca acaccgtggc gcacaactg cagcgtgacg acaactgagg cttgagtggt  
20641 ccgctccgg atgaaatgtc gcacaggcag ctggcagaaa ggcttttcc cagcgtccg  
20701 ggcaaacctg cgtacaagat gccggattac gcctatgtg acaaggaaat gcagaaaagc  
20761 ggtgtgacgc tgaatctgct gtggctggaa tactgacgacc agtgcaaagc gtccggcgaa  
20821 attccgtacc agtctacca gttcaacaag tattatagcg actatctcaa caagaccaat  
20881 gccacgatgc acctgaacca caagcccga gagatcatgc aggtggactg ggcgggtgat  
20941 accgcttccg tcatgacac ggataccggc gaaatcatcc ctgcctatgt gttcgttgcg  
21001 accctgcctt acagcggcta cagctatgtg gaggccttct tctccatgaa ccaggagtgc  
21061 tggactgccg cccatgtcaa gcctaccgg tatttcggcg gcgtcacgag gatgattcaa  
21121 tgtgacaacc tgaaaaccgg cgtggaaaag cacggaaaag atgagggtgt tctgaacaaa  
21181 tcctaccagg agctggcggg gcattatgcc actgccattg ttctgccag ggtcagagcg  
21241 ccaaaggata aagctgctgt ggaaggaacc gtagggatca tctccacctt tattctggcg  
21301 gcgcttcgta acagacaatt cctgtctctg ccggagtga atgaagcaat tgggagcgt  
21361 cttgaagcgt tacaacaaa accctccag aagaaaaacg gcagcagagc cagtctctt  
21421 gcggaagaaa agccgttct gcgaccctg ccgccctatc cattcagct tggccctgg  
21481 aaaaaggcaa ccgttggccc caactacat atctccgtgg agcggatgaa ctactcgtt  
21541 cccttgagt atatccgcca gaaggtggat gtgcgttga ccagagccac cgtggaggta  
21601 ttctacaacg gaagccgat ctgttccat cccaggctgt acggcaaat caaccagtac  
21661 agcaccattc aggagcacat gccgctgac caccagaaat atgtgcagtg gaacggggaa  
21721 aggttatcc gctggccgg taagattggc agcagcacag aatgtgctgt ccgcctatc  
21781 ctacagcagct acaaggtgga gcagcagggg tataaatcct gtttgggact gctgaagctg  
21841 gctgacaaat attccccgc gcgctggaa ggtgcctgca agcgggcatt ggagttcacc  
21901 cccagacctt cctgaaaaa tattcaggcc attctgcct ccgggcagga caaactcccc  
21961 acggagccgg agcccacgct ttctccaa tacggttca cccgtggcg tgactattat  
22021 gacaggggga agaaggaatg ctgacgcaga caacgattac aaagctgcgg gaaatgcgcc  
22081 tgagcgtcat ggagtgcc ttgaaagacc agatggcaga cccacaattc cagaacatgg  
22141 ccttgagga caggctggg ctgttgggtg atgcggaatg gaatgcccgc aaaaataacc  
22201 atctgaaaa actgatccgc caggccgct tctccgacc cggcgctgc ctggaatg

22261 tggataacct tccagacaga aatctgaagc gggaggaatt gctgcggtt ggcaactgca  
22321 attacattca ggagcaccac aacatcatcc tgctgggagc gacagggagc ggcaagacct  
22381 atctggcatg tgcgctggga atggcggcag tcagacagtt cctgacagtc aagtacatcc  
22441 gtctgccgga tctgctggtg gagtttcaca ttgccagagg cgacggaagc atccgaaagc  
22501 tcctgacca atacaagaag tactcgctct tgattattga cgaatggctt ctctacccgc  
22561 tgaaggagac ggaagccaga gatcttctgg agattatgga ggccaggtac aagaggtctt  
22621 ctacgatcct gtgtccag tttgacattc cgggctgggc agagaagctc tccgatccga  
22681 ttctggcaga tgcgatttgt gaccgcattg tccatgacgc ctacaccatt gtcattggcg  
22741 gcaaggagtc catgcgaaa cggaaaggct tgacgaaaac ctgatgtaag agcctgcggc  
22801 tcaactggct ctgcccggac ccgaggtttt gcgcattccg gttttccagg agagtattg  
22861 gtatggtgca acaaaaaaga gagcgatgct gacgacatca ctctctgcc aaaccata  
22921 tacggcctc atgctctcc tcagcgttc actatctcc gatattggcta aaagcaaat  
22981 tatgatacca agcacagcat agtctgtaa tattcaatcc gagcgggtggc accgctcaat  
23041 ccggcggtg ccattgtca attcagcgg aacgactgct caatttcgcc ggtcgaggtg  
23101 atctggcgag gcggcgtacg caccatcaat cctggcaata agaagatcat tattttcacg  
23161 gcattctctg ataccgaga ctatctttt gcaaactca gcagatttc gaaagagaat  
23221 tttgggctgg aaacggcaga gatcaccggc acagttgacg gtaagactac cattccaaag  
23281 ctccgggag acctcaacac ggttctaacc tgtttctac ccggttcaa aggaaagtcg  
23341 gtactctgc ccggaagtac cgatgagctt gacattctga ttgacgcca ctgtattcc  
23401 gaaggtcaga actgacgga ctgacgactac ctatcaact atgacattca ttggaacct  
23461 gtgacgatta tccagcgtt cggacgaatt gaccgatcg gaagcagaaa cgaccatata  
23521 cagctcgtaa acttctggcc ggatattggac ctgacgagc atatcaacct gaaaagcctg  
23581 gtgaaacct gcataagat ttgggtcatg acctctacc gcgacgatga cctgatcaac  
23641 gccgaggaaa aaggtgatct tgaataccgc gcgcacagc tcaagcggct gcaagaggaa  
23701 gtcgtggaca ttgaggacat gacaagcgg atttccatca tggatttggg acttaacgag  
23761 ttccggcttg atctgctga atacatgaag cagcacgagg acattgaaac cgcgccgaaa  
23821 ggactgcaca ccattgttc acagacagag gattctccta ccggttgat ttcgttctc  
23881 agaaatatca atgacagcgt gaacattgac aatcggaaac gcattcacc ctctacatg  
23941 gttacatca gcgaagagg cgaaattgtc tgcgattacc tcaatccgaa aaaactgctc  
24001 gacacatgc gtttctctg tctggcaag agtgagcct gcatggagct ttgcaagcgc  
24061 ttcaatgac agacgatga tggacgtaa atgggtgaag tctctgagct gctgagtgag  
24121 gcgatcaatt ctattatga cgtgaaagaa gaaaacgata ttgacagtct gttcaagagc  
24181 ggccgacat ctgctgctc cagtgcggtt tcaggactgg atgatttga gctgatttc  
24241 ttcttagtc tgaataagg agggctgctg atgcttgggt ttctgcatc tacggagttt  
24301 ggcaaaagaa taccaaagca gaaattctat gagaatctt aggtttccc tgctttacg  
24361 cgtgtgttg tcatcagat ccggctggtg tactggcgaa ataagctggc agcgtctaca  
24421 ctgaatattg ctgcccgcga aatagtacc gagattgaag tgttcgaggt gcgtctgaat  
24481 gatccgcagc ttgatgaagc ggtgctgaaa caaatcgaca aggaaatccc gtaccatata  
24541 ctctttatt tgacctgta cggcaaggct caggcgtgga tggctacaa ggaggctgcc  
24601 gcatccgca gcaacgcctt taagtgagc cgctattatc ataccgactg gatgccgga  
24661 gacgaactgc atctctcct cgacggctt aatatggatg ccatctatga aagcctggt  
24721 cgcaaatcg ccggggagaa gctgcaaacg gattccggcg agagtttga agagtctgtc  
24781 gagcgggatg aaaagaagaa gcagctcga aagcaaatct ctacgctgga aaacaagatg  
24841 aaaaaagaga agcagcttaa ccggcgatg gaaatgaatg cgaagttaa gcagtaag

24901 aagctgttta gggagattgc aaaatgaggg ttaaactatc gaatcgaaag ctttgaaag  
24961 agtattatgc ggtccttct gcgataagtg taattgcatc gttcgtttc ctgtttctga  
25021 aagtaccgga tggaaaagag cttttatgct gcattggctt tttgatctgt ctcataatt  
25081 cattcctaag agtgtggat cgagccaacc acatcaaaa cgctgtactt aacatcaata  
25141 attcaacgct ggaaattgga cttggagata ttttgagga agagggcttt aagattatcg  
25201 cattcaatga gtttttgat acccaagtag atgatgtgtt tatatcgaga aaaacgcta  
25261 atggaaagta tataacccat tttatccac aggtatcgga attggatggg attatttctt  
25321 ctgataccca tcatcagag caaattgttg gaaaactcga aagagaaacc ggaaaatcat  
25381 caaaatatag gctgggaacg attgtgaaaa acggggagta ttttctcctt gcctttacc  
25441 atttgacaa gaataatagg gctttcttag aaatcaatga ctatattgac tgcctcatga  
25501 atatgtgaa cgagtgtgat attcattacg gaggaacac cgtgttttg ccgttgcttg  
25561 gatctggaat tactcggttt cggggttatg aaaacataac ggatcaagaa ttgcttgaaa  
25621 tcattatttg gactttcaag atgagtcgta ttcgattcca atatccagca aaagcaaaga  
25681 ttgttttaac aaaggactgt ctgagtaaag ttaatcttta tgatttaaaa ttacaataca  
25741 aatgattgga gggggagcaa acatggcaca taaatgtttt atttcattca aaaaagagga  
25801 tcagtggtag cgtgataaaa tagacaatct cttttctgcc tcggatataa ttaacaaagg  
25861 gcttgatcga gtgattgata gtaatgacgg agactatatt atgaaaacga tccgccaaga  
25921 ctatcttaa gactcaactg ttacggtatt tctcattggg acacattcgg ctgaaaatga  
25981 gggatgtgat tattggggac ggcgtaaaaa ctatttcac gaacgtgaat tgcaagcctc  
26041 cttattcaat ggtgaaggta acacgcgaaa cggatatttg ggtgtgttc tccctgagat  
26101 gtgtgatcaa atctacaagg gaacttacca atgccaataa tgtaatggaa cgcatagta  
26161 tgttctatt gatgactcga cagtgatccg tgaattcagt gtcaactatt acattgagcc  
26221 tcactctggc tgtcgtgtt cagatgatga tcgctattgt attctttaa aatgggatga  
26281 cttgtttcc aacccgaaa aatatgtaga catggctttt gaaaagagaa ccagtccggt  
26341 tgcggaaaaga gtaaaaattc gtaatctcg atgatagttt tgaagatcaa caggcattcc  
26401 ttatgttta attatgggag gtcaaatga aattttcatt tactgcgaaa aacgagccag  
26461 aatgtaagtc tttctcgaa atcaggatgc ctgatgtgta gtatcagccg atagacgagt  
26521 tcattaaagc acagcctgct atttctgagg cagatcttga gacatgctt ataaagtatc  
26581 gcggggacga gaaaactat aagcaggatt ctgatgatta cgttccttt tcggaacca  
26641 tgaagttgt aaattttatc ccgcaatgc taattgtaga tcaatccatt aaaccagcaa  
26701 tttatttcg gcagaaagcg attgaatgct tacaattgc tcggttctt acaatgaaa  
26761 gcaattgat tcttgacag gactacaata ctattgggc gcagggatat gttccacagt  
26821 atctctccg ctgtatctac tttgggacgg cgacaacatg gtattctaat gccttgacc  
26881 atgtactgca aactgtatat tgggggaaga aactatacac ctctgctgtt gacagagatg  
26941 ggatccaata cagtacaca tgggatgcaa agaaaatcat gacatattgt acatacagat  
27001 ttgtgtggg cgaattgaag aaatcggag atactgcact cagaaagtgc ttgacctcat  
27061 gctcagggcg aatcgagcaa gtacggagt gggcaacta tatcaagcat aaaggcggca  
27121 tcgactataa gtacctgaa ccggaaaacc cgtttaagct atactgcat tccatcagc  
27181 caaagggcga aacagaagaa atcatctatg ctttacata ctatgagtcg ccaatcggac  
27241 gtcaaactc tgcccctccg ttgacaccac cgagtacatc gggaggaagc aattccggaa  
27301 gcatccggga tgactatgac aatcccgaag acctctggga agataaccaa gattggtatg  
27361 aggacgagga tgaagcgtgg gatgagtgtt acgacggta agctccaaat gagagatttc  
27421 ctgtttccag cgattttaat tcctgagtc gatgctctat tcataggaga cgctattcga  
27481 cttttagaa ccgctgact tttactatg acgtgcaaag tcacgcgaaa caatgagggc

27541 agttcattat ccagataatt accggatagc aaataggttt ctcggaagcg aaaagacttt  
27601 cacgattccc accgccgttg atcgaaacgt ccgatttttag ggtgttttac agccgctcaa  
27661 ccgcaagcgt cactgggtca atcacaatga tatgctttcc gttcctgccc tgtgcatagg  
27721 tcacggtcct tcccgtcca ctgggtttgc catccatac cgtaataatg aagtcggcgt  
27781 gatcgaccat ataacggttg cgcttgcca tgcagtcggg cgagtagtgg ctttgggta  
27841 cggaaaagat acaaaaaaga gcctctgccc ataccaata cgggcatcga cagaggctct  
27901 tggttcgttt tccgggcatt caaacaagtg ccgaaatcga ctctatttc cgcgctaaag  
27961 aagaaaccgc gcaggggaata caatcactta ggttggtcaa tttgcgccg tctgaggctt  
28021 gcaatcacag gcttttcca ccctaactg tctacacctc gatgccttg gggagaagt  
28081 cggacaggcg atgagaacgg cacggaagct ctgcttgag tcatggacgc agcggacaca  
28141 gaagcggta tacttccgcc gtccgtgtc agctatgaag aacgaccact cctgcctcca  
28201 tttctgactt ctgctcaaa ctcaatctct cttttgtgct ttttgggagg gcagattcc  
28261 ttctgctttt cagcctttgc agacttgagc ctgtccatga tggaggactt ctcgccctt  
28321 tcgggggctt tgacctctgc ggtcttgct tccttcggac cgttggtgat gatcccgta  
28381 atcatgccgt agtcatcctc ggtagacatc tcggcggctt tcagatagtt ttccgttcc  
28441 agcgcggcct tccactgac ctctccaca ccgaagatac caccctttgc agcatgatcg  
28501 tggatttctt ttgcatccag aaccagccc tcggtattat caccgtacag ccggtagaca  
28561 gaacaggttt tcatgacctc ggcggcagct tcctcccga tggggagcat accgcccac  
28621 gcgtagccgt agtcttcat ttcgtcagtc gtgatagaag gatccggcat ccggtcaacg  
28681 gtcatgacct cctgacggag aagatcaacc gtatgttcat cgaagccgtc atacacatcg  
28741 ctacgggaga gcttgccgtg ttatccacg atgagacaag cagcttcatc gccgtagcta  
28801 tcatgctcca tcaggaaaaa ggtatgaccg tcaacctcca tgtgatcaat ggtgtgccat  
28861 gttccacat ggccggaac agccagaccg gaggtgtcca tgttgacctc aaaatattt  
28921 tgttcttga cttctgctt ctgctgctt tcggagatca tgggaatcgc gacaattctg  
28981 tctccgagct tggcgaactg ctccggctgt tcaagagct ttgcatactt gagtgaagc  
29041 tcaatcca gagaaccgaa gctgtcatcg gtcagaccga caatgacaaa ggttccggca  
29101 acaatatcat agatttctc gtcttcatcc cgcagagcgc gttgagagg aagaccttcg  
29161 agctttgctt cctcgttga aacaataccc accgggtcct catagggata aactgcctga  
29221 atgtagccgc ctaccagagc ttgcagcct tcaaggcttg aatcgatctc tttgattcc  
29281 ggctttttc ccggctcaac cacaacagca agaatttgc cgtccttcat aggctgttcg  
29341 ccgctctgg tgagacggta ttcgtcggga atgtcatca gactgccgtc aaacatccgc  
29401 gtccaaccgt ctccgtatt gcgtatatag ccatcatcgg tgaatctgcc gccttcatcc  
29461 attccacat cgcgtccaaa acgctcaaag tcaatgtagt tagcgagatt acccattgct  
29521 tttgtgtcgt agatacctgc ttctcgatg tagtagcgc ccagatcctc ttcacccgtg  
29581 acatcgggaa gtagtcgta gcagtcgaga tttaggtca gttgatgag atcgtcgatg  
29641 tcgctgactt catcgagcc agcctcata atagcaaaa acttttctg atcccattg  
29701 tccatctcat caatcgaga ggcaaggtag ttcagcttat cgaggcttc atactgccg  
29761 agcagctttt gaaccata gatgggacac tcgtagtcgg tgataacca ttctcgtac  
29821 acatagccga actcatcctt cgagccgata ccgatgcgt caaaaacttt ctgatttcc  
29881 tttcgggtg tggggaactt caccattca ccgacgagc caccttcat gtacttgccg  
29941 agattggtga caaacgctg gaaactgtca tccataacag gcataagcat ctccttca  
30001 gtcatcatc atgctgtcc gcgcaatata gagcgcgtc aactcagcgt cagacattgc  
30061 ttcgagctt tggacgtct tgtgatcag ctccgcgatc tcgctgtct tgttctcag  
30121 agtgacgctc tctatgtct caatcagcc cttccggctg gatgtgttga agcagacat

30181 gagattgatt tcttccgagg taaagtattt catatcagag taccatatcc ttcctttgg  
30241 ttttctgagg tttcggaatg tgagggtgatt gagctttttg cgcggatttc agcttatcgc  
30301 ggatagattc acgagcagca ggcttctttg gaatggtgtc atagatggca gtcccggcat  
30361 cctccacata cgaacggaca tactggatgc tctcagaaaa gcggattggc ctgttctgt  
30421 cctcaatggt ggtcagccgg acttcatcgg cagcaaaatc aaccgagtca atttgcacc  
30481 tgatcccgtc cacattcagc gtcgcaccga caggaatgta atctgcggct ttgagttcct  
30541 tgaaggcttt gccgtccttg ctgagaaaga catctgtgcc ggatttcag agcttgtgag  
30601 aaccggctac ccacgcggtt tcacggaagc ccgtgaccgg catggagggc ttgctcgcga  
30661 ctttcttctc aaggagcttt gtgccgagaa gaggggcggc ttttcggca tccttgcgt  
30721 acagctcaaa atagccgttc tgggcaaagc aaaccagcgc gtccgggtga gcctgtttga  
30781 ttgcctcata ttttctgagt tctgcaatag gcagaggtgc aagcacttct ttcgtttctg  
30841 cctccggcag cttgtcacgg cggcttttct gcgtggaca tacttctgcc aaagcatccg  
30901 cgtcttttgg gagcgtctga tgggttaca caccgcatg ctaccgacc agagccattg  
30961 cttcatcga gctgtcggc caggagcgt ccagcacata accgtccgca aaggtcaggc  
31021 ggtcatgatc cggctcaact gagttccgcg ctacatttgc gcctgttcc cggtaattga  
31081 tctcaaagac atctccgaat acctgccac gcttaacatc tttcgggaca atcacgcggg  
31141 caatgcactc gtcgtaggtc tgttccgcat aaaagcggaa ggtgttatga tcccgcgtcc  
31201 cctgaataaa gacctgatt tcttgaggc agtgtgtccc atgcggacgg cagaaccaca  
31261 taagcgtctt gtcttcggga ttctggcttt cggcagcgcg gcggatgatg cgcttgcga  
31321 tgtcgaagtc ttcttgaag ctgtctacat gactatccac gagcttctga agctccgca  
31381 tgatgtcaac gtctgtgat ttctcatgc gtctccttc tcacaactcc atgtcgtgcg  
31441 attagcctt ggccggagct tcttttccg gctgagattt ggcagcagcc ttgagttggt  
31501 cacagatcga gggcttttcc tgcttttct cctgtcggat atactcaagc gtaggtgtca  
31561 gctcccgata gcagccctgc gtttcttgg ccgaatgacg gcggtgaatg gcaaatagcg  
31621 gctctccgct ctgcgtgacc gtattgccct cgatctgac tccgttccga gcatgacac  
31681 ggaaggactg ttccgatgac cgataagtgg aaagcatccc gtcgttattg tgagcaatct  
31741 gcgcttgag ggtgtcata acagcgtccc tgatctgtt ttcctccggc gtgaggcgat  
31801 gcttcgggac tgcggttcc tgcggttct ctgcggttgg tgccttgact tctacaacgg  
31861 ttttctgat ggagacaacc tcgtcgcgtt ccatgcagc aacctccggg ttctgcgtcc  
31921 gggcgttggc ttctgttgc cgctcctca catccatctg ccgcataaac tcggtgatga  
31981 agagatcggc caaacgggg tgtgccttat ccacaatgaa ccgggtagaa agctccgggc  
32041 aaacaggtat gtctttgccc cagcctttg ctttctgca gatccttccg tcccaatcct  
32101 tgtgctggac ggtgtttgcc agaacaatatt gactcgtc cggcgagaac tttcaagaa  
32161 cgctcgtaac cgcagattca gcagcaaggc ggttattgcc gtaatactcg ctgatcgtcc  
32221 gctctatggt atctctgcaa gcaatattcg cttgggcgga gagcctataa gcatccgttt  
32281 ctccggctgc ataagcgtga tccgccgttt cgggtgaaac gggaataaccg gcatcacgca  
32341 gagaaggagc tacttccggc tctttggcgg gagtatctgc ttccagcgcg gcagtctggt  
32401 ttttctctgc cagcagcacc ttgagcttgg cgtcaatgct gtcgatcctc tcagcggcgg  
32461 tcttgcggat ggtttcaaaa gagccttca gctccttggc ctcttatct gaggaccaac  
32521 cggcgatata gccgaaggaa taatccgaag tctcaatgcc gtaccgctgg cagacggtgt  
32581 aggccagct ctcggcttca acctcttgg tatggcgatc tttccgcatc tcctgaacag  
32641 cggaggtatc ttctcaacc tcaagccgc actcaaaacg gtttcatca acgaaacacc  
32701 atccctcgtg ttcagcagcc gcatttgcct ctgcctcaga cgcgaaacct gagagaaagt  
32761 cccgcttggc gccgcatcg ctgatcatga cgattttcca tgtgggttcc ggctcaggcc



32821 ggtcaataga gtggagcttc gcatgggcaa tttcatgaat cgctgtttg atggtctgga  
32881 tttcgtcat gccctcctga atggcgatcc ggttctctat cggagagaaa tagcccttg  
32941 cgccgccggg aatgtctca aaggaaatcg ggacgggaga gtcctgttc agagcttcaa  
33001 aaaaggcagc gtagttctcc acgctgccgg aaagctcatc cacaatgatg tcaggaagct  
33061 ccttgccgtc ggtctgggag atgtcgaaga cactcaccac cttgaatgcg ggacgcataa  
33121 cctccaccgt ctctgtgatg ggtttccgt ctgcatccag caccggcttc tgcgtggaag  
33181 gatcgatctt ttcacgctct tccttgccct ttagggcgc aggagcagat atcttgatgc  
33241 ttttctctc cttcatgacc tgacggctca aattgcgctg ccatgaggta tatccggcaa  
33301 cataggtggc ctccggttc tgcattggca tgagaagggt gttgctgaat gagtagtgat  
33361 aaaactaga catcgtgagg agatattcct tgaaccgctc ggattcaaac agctccttga  
33421 tgcctgttc cagctgtcc gtgatctctg ggactgtctg tgcctttg ttttctgca  
33481 tgtgacacct cctattttt caaactccat ctgaagctg acatatttc cgccggtatc  
33541 atccagccgg atgatcgc atagagctg gggccgctc ggggtataaa gcccggtcac  
33601 ccggcaccag cccttgcca gcagctcctt ggcaatctc ttggtcagct tcttttctt  
33661 gctggaaaag aacttattgt cctccacag acagaaggga cattccttgc tggaaacagta  
33721 ataattgcc tccccacat acaccgggga gccgcagcgg gggcatttgc ctatgacctc  
33781 cttgccggag tcgaagcgt tgcctcagc atcggagagg aaggggtacg cttgaccag  
33841 cgaggcagc atatccacga tcccggcag gaactgtcc ccatcggcct gaccgcgctc  
33901 gatctgcatc agggatattt cccattccgc agtcatggca ggtgaagtaa tctgttccgg  
33961 cagaacacat acgaggttca ggccatcctt ggtaggcacg atggatttc ccttgcgctc  
34021 ggcatagccg ctttgacca acttctcaat gacaccggcg cgggtggcgg gtagtccgag  
34081 acccttttc tcggtatcat catcaaaccg tcatttccg gcagtctca ttgcagaaag  
34141 cagcgtatct tcggtgtact gcttcggagg ggttgataa tgctcggtta cactggctga  
34201 tacggcatcg aggacatccc cctcgtgac ggcaggaagc atttttccg gctcgtcatt  
34261 ctcttgctc ttgagcggg ccttgaatcg ctgctcaacg gcttccagc cctcctgac  
34321 aacggtttg cccttgctg tgaatacata gccttcacag gagatcgtca aggatgtctc  
34381 ttcgtaagtg tgcttctcac cgggtggcaga cagaaggcgc atggcaacca gccggaggat  
34441 tttctgctc gactccgca ataccgaaat gtctgcttc tcaagctgga cgtagggat  
34501 aatggcatgg tgatccgtga cctcgcatt gttgtgata cgccgatgt tgggagcata  
34561 gtcaggccg tcgaaagccg acaccttccg gcacacaatt ccgatgacct gacggacggt  
34621 gctttcatg tcatccgtga tgaactgact gtcggtgagg ggataggta gcagcttctt  
34681 ttcgtagagg gactgcacca gatcagggt ctgctgtgcc gtgaagccgt aataccggt  
34741 ggcttcccgc tgcaaggtgg tcaaatcgt gagcttcggg ggattgaccg tcttctctc  
34801 gcgcttgaca gaagaaacga cggcctgtt cttatcaca gccaccgca tcgtcttgc  
34861 ctcatcttcg gtttgacct tctcataatc agcgggtgaga ttgctgccg tcacatggac  
34921 attgaagtat ttcttctc tgaaggtgct gatcttccg tcgctctg ccagcattgc  
34981 cagcgtggg gtctggacac ggccaaccac cagcttctg tgatagagcg tggtaaacag  
35041 ccgggtgtca ttgatccca caatcaatc tgccttgac cggcagaggg cggcttata  
35101 gagcctgtc aattactgc tatccgcag atgagcgaat ccctccgga tggcagagtc  
35161 ttcaaggag ctgatccaga ggcgcttga gggcttggt caaccggcct tgtttagac  
35221 cagccggaag atcagctac cctcgcgcc agcgtcgggt gcgcataca gctcggtagc  
35281 gcgcttatcc tcatcagat cgcgcagcac cttgaactgc tgtgcttgt cctcggac  
35341 ctatacagc catttctcc gcacaatgag cagatctcg tacctcact tggcatatcg  
35401 ctatcatag gaactcgc cgcgaagctc cacaagatgc ccgacgcacc atgatacat

35461 gtagttgttt ccttcgagat agccgtccct gcgggatgtt gcgcccagca ccttgccaat  
35521 ggactgcgct aactcgggtt tctcagcgat gactaaaatc aatccgtgaa cctccttctg  
35581 aataagatga agcccctcgc atttctgcaa ggggccgcga tcaatcctta ttctcgtca  
35641 tcctccggct cgtcatcagc ggcaatctga ggctcttcat cctcgttgat atacggctct  
35701 tcctcgtagc cttcatcgtc aaagaagtcc atatcctcgt cttctgctt cttgccgga  
35761 acgaactga ttagtaata gcccgcgccg ccaataccgg ccacggcaat gatgacgatg  
35821 atcatgcca tattgctgtt cttctggggc ttctcatcca ccacaggctc cggttcctca  
35881 gcaggagctt cgggctcagg agccgcgccc gtgcattcac tcatgttggg ttgacagaca  
35941 gggcaggaag tgtgacatg accggcctca cacttttcgg tacaggtaca ggtggtcagt  
36001 gcagccacgg agtcctcatc catcagggca agcagatcac tttcgtccac catgttcagg  
36061 aagtaggtct ggtactgttc ctcttctcg ttgatggcg catcgtagtc gatcacgata  
36121 tagaagggtg tgccgtttt cgtctgaatg gtgatgaact gcttgttggg ggctttgtca  
36181 tacagcagat cgcgggtgga ggcttgccc tcatcgtcaa tcggctccc tcgagggaagc  
36241 gtctctcgg gcggctccgt ttccggcatt tcctccggct gcgtggcctc ggtcacggga  
36301 agattctgct cgggtcatc cgcgtaggca aaggcggta gggagaagct gcaaacatc  
36361 acagcacaga gcgccagcac ggaaagcaca cggattcctt ttcttact catttcaga  
36421 tacctcgtc tcagtgtt cagggatggc cgcgctcgg gtttcatcg cagacaggaa  
36481 ggacatgatc tgatcctgt ccataacct agcgcggaca gtgtgatga ttctgaggtt  
36541 ttccatctcg gtttccgat catacagctc cttgagctgc gcctgaagat cctcgatttt  
36601 ctttccggtc ttgcaatct cagcgcagac cttctgatat ttgggattca tagaaaactc  
36661 ctttgcctta atagggcggg ctccaaagg caaagaagt agactgccag taggaagagc  
36721 tgatggatgt gtactggatg ggatgccgc agtcagcat cacattgtca ccgacataaa  
36781 tgccacatg ggacacgccc ggggtgtcgt aggttcctt gaagaagatg agatcaccgg  
36841 gctttcgtc ggccttgaa accggtgtc agatgttga tagcccctgc gcaccagcc  
36901 gcccgtatt tacaagccc ctgttggtca ggacatagga gacaaaacc gagcagtaaa  
36961 aggaggttc ggggttgag ccgcccaca catagggata gccaggat ttctccgct  
37021 ccgcaagcag tgtcgtaac cgtcatcac tcagatactc gcaggaacc tcataatcg  
37081 tgggagggtt ggtgacat ttgtccacat agccggatga cgggaacagg tcctccggt  
37141 tgccagcac cgacatag gtggcgtaca tggatagctc gtctgtccc ataagttaa  
37201 cggggacatg gctgagattg aagtttcca cgtcacatt gcagatgtaa taagaatacg  
37261 ggacctgaac ggtgtactca tattctctt catagcttc accggtgtcc gggctgtga  
37321 ccgtctcgt gccgtccgg gttccgtcc ggtatcggg ttccagatg acctttcgg  
37381 tgaggatgta ctgcttca aagagcatat cgagcgtccc ctgaacctc gagagcgtcc  
37441 attgcctc atgaagggca gaaagaatgg agatcagcac ataggggtca tgctcagatg  
37501 catccagatc gaagtgata tcgtcataat cgtgggtggc ctcgtagta tccagctt  
37561 cttcagctc tgctccata cggcaatact gttctcagc cccagcatg gcatcatct  
37621 cgctgagata ggaggaagc ataccgct gaccggtaga ggaaaacatc gcagtcatg  
37681 agctgacacc ggacgaagc agaacgagaa tgcccagccc cacaccgaac cagataaagt  
37741 atttctgtt ctggagaag aactcttca cttatcggc agctttctca ccggccttct  
37801 tggccgtgga gtagtcgcg gttccggcag tctcgttcc ggcctttcga gccgccgct  
37861 actcctgct gatctgctc ttctgatag gtctgttcat gttccgtgc ttttcatct  
37921 caggatgatc ctgctgggtc tttcatagt gcagctcgt atcggcaatt tcagctcat  
37981 gttccagctt ggacacctc tcatagggct tgttgctg atctgcctg tgatgactgt  
38041 aatgacgggc agcggattcc gcaaggattt cggcttctg ggcggctcc acggcagatg

38101 tgtcctgctc gacctcatgc agctttccat gaacgacggt ggcaaggag tctccgacct  
38161 tgttttcgct cttttcgtc tcgaattgga gcttactcgg ctgcttgga ggcttgatct  
38221 catcctcaaa gtgagacgg gttttgccct tgccggttc tcatcaacg acgctcct  
38281 tctgagaac ctcttggtg ggaagacttt cacgggcagc gtccagccgc tcatgctcct  
38341 gttccgattt tcttcgagc ttctgaatcc gcttcgtggg cgggacagca tcgtccatga  
38401 ccggctttgc ggaagcagtt tcagccgctt gagaaagtac agcatccgcg tcaactgcct  
38461 caaccgaga ggtcttgcg agcttgctg tgacaatcg ttctgcaata accgtaccgg  
38521 tatgagagga aacaccgtgc ggctcaaaa ccggagggtt gaacggtgct tctgacggag  
38581 gcagcgttc gggtagattc tgggtagtt tttccgctt tttcttct gtgacagacg  
38641 tttcgagga cggctgagta ttgctatcct cggcgtgttc cgctgaaac tgacgtgct  
38701 gactgcgat ttgaccttt tttgttct ccgcagaaat tgcttcgga ggctcatt  
38761 cctcaaccgg ctgaccagc tctgcatctt ccggcctccc tgaactcg ttctctgctc  
38821 cagccgtcag attttctca accgcaccgt cctgcgtcat tctacgaca acctgtcct  
38881 tgggcttaa ctgtgttt accatcagat ttacactccg atccgcct ttcgagttc  
38941 tgcgtactca ggattcagtt caatgccgat ataatggcgg ttagctgct ttgccacct  
39001 accggttg cgcctcccga aaaaggatc gagaacaatg ccgcttcgg gacaaccggc  
39061 cagcagacag gttcaacca gcttcgggg ataggcagca tagtgaccgc cttgaaggg  
39121 aaccgtattg accaccaca catccgctt gttgcgatg ggattgatca tgctgctggt  
39181 gatctgcgg tgcaacgag gccggtgat ggtctgggtc tgaggctggc cgggaaccgg  
39241 ctgcccgtat ttttgccgc cattcatacc gcgcttgagc ttttctgccc ttgccggagc  
39301 tatcggttc gaaattgcct tggcgtcaa gaaatactc cggcttttg acagcaggaa  
39361 aatatgctc tagcagcggg aacagcagc ctgagctc tccggcattg ggtttcctt  
39421 catccagatg atgtcgttac gcagatacca accgctgtcc cggagggcaa aggccagat  
39481 ccacggaatg ccgatcatat ccttcggctt gcagccctca acctgtagt tgagagccac  
39541 agtctgaccg ttctgcctt tgggattctt ggggtcaacg aatcacctt gattgcctt  
39601 cccggcatag gtgtcggcaa tgttgagcca gagtgtccg tcggaacgca gaacgcct  
39661 gacttcgta aacacttcg tcaggcgcga gatataatcc tttggtgtg cctctctgccc  
39721 gatctgttc tccatgccg agtcgcgag cgcgtagtag ggaggggatg tgacgcagca  
39781 atggacgctc tcgtcgggca gggcttcag aacttcgaga cagtcacaa ttagattgt  
39841 gtcaagctgt atgggatca ctctttcgc tgagattgaa gaggctcag cggagaaata  
39901 ctctcggc tcctctctt cgtcatttc atctcccag cggttcagaa tgcctcggc  
39961 ttctgcgcg gctcgcggt acaggctcag gcggttctt tcaaacgcgg caaaggcggg  
40021 aacatactt ccgaactctt gaatggcgcg gacatcctt gtgcgcatat ccgcaacct  
40081 gccagcagc tctgcatcg tcagcagatc ctcaatcatg agatctact tctcttggg  
40141 aatggtgacg gcttcgctt cgtcctcagc ctgcgcaaag gggattgtc cctcagcga  
40201 cacatgtag aatgctctt tcgcttcag ctcatccag ataccggcga tgaactcat  
40261 cacggcatca gcaggtttt cgatctcggc cctgacatgg aggtacccc gatggtgctt  
40321 tttcagctt tctcttgt gtagagatt gaccagctc atggtcaca ccatcaggcc  
40381 aaagaagctg tccatgccct tcaaacctc gcggaaggtc atctcagcg cagcatcacc  
40441 gaaagcctg gtaaactctg ccatcatcg tttgagtc atattggtg ttagttctt  
40501 atccatattc aaaatctcc ttgtaatcaa gccgttctt cgagcttgg ggtcatgat  
40561 cggtaaagct ggggtctctt cgggaagtca tcttgaagg gaacgatgt ggagccgtag  
40621 aagatcagc cctcaccggc gtggagttg gtgatgtag tctgctggc gggagagata  
40681 ttgagactt cactgaggt ttttctgtt ccggaagcct gattcagaag atagacaaa

40741 tccgagtct cgaagatgtt ctcaacctca cgggaagcca gaagatcctt cacattctgg  
40801 gtgatcccgg tggggatgcc gcccattta cgaaccgct tccagattc cacgctgtat  
40861 gcggcggctt gttctcttt cagcagcaga tggaaactcg ccatgtagta ccgagtggcc  
40921 ttatgctggg cgcggttgat tgtgacgcgg ttccacacct gatcctgaac aaccagcata  
40981 cccagcttct tgagctgttt gccagctcc ttgatgtcgt agcagacgaa gcggttgtg  
41041 acatccacat tcgttctgtg attgaagaca ttcagagagc cgtgaacata gattccagc  
41101 gcagttgca tgcgctgtgc ctccggctct ttttggttgc gcagaatgtt gtagaggct  
41161 tccagaatgg gcattttct cggcttggga tcggcaaggt agtcctgata gacatgcgg  
41221 acgcttcggt caatgatgtt cttctcaacc ggctgcaagc cgtccttgc gccaacaatc  
41281 agctcacaca tggagaggat gaagtcggac ttcaaggta gcgggtttt ctctcggag  
41341 tagttgacat tgatgtccag cggattgatg tagtcggtac tgatgggca aatgcggata  
41401 acctgaccgc cgagcttctg cacgagggga taatactcag cctcggggtc gcacacgatg  
41461 atgtcatcct cgtgatcag gaaggcgtt gtcattcac gctttgccga gaaggactg  
41521 ccgctgccg gagtaccgag gataagcca ttgggttct tcaatttct cctgtccacc  
41581 atgatcatgt tgttgacag cgcattcagt ccgtagtaca gagcctcgc gccctgaaaa  
41641 agctcctgc tggtaaaccg gacgaaaacc gctgtactgg aagtggtaa cccgcgctca  
41701 atctgatct gttcaggcc gatggggagc gaggacatca gccctctt ctgctggaag  
41761 tccagacgt tgagcgaca gttgtattc tgtcgatgg atgccgtctg gaagacagc  
41821 ttttcgagct tctgacggtt tggcgtgtg ttcatgatga ggatggtcac gaggaacatt  
41881 ctctgttt cgtctggag atctgcaac agacgcttg cctctccc gtaggtggca  
41941 aggtcggac ggatgatgtc catatcgtag ccggaacgga cggccttct ctgcttca  
42001 atttcatct tgtccagatc ggtaacttg gacttgatgc gcttgatgg ctgagcctga  
42061 tcaattgtgc ggatagaag attgaccgta atgttagagt ccatatcag gaagtctgc  
42121 agcatacgg cattcagctc cggcgcgaga atctgaaaa agctaccgc gccgatgggt  
42181 ctgcccact tgaagcatt gcctcccga aagtcgaatg aggtaggcg gatgaagtct  
42241 ttgctgctga gaccggtac ggcaaccata tcgaaggaga agcggaatgg ttcgccggag  
42301 tccatgttga acatcatg caggactt acagcttcat agccggacag cggctcgggt  
42361 ttacaccga cgtcttgaa gttgttgg atgtcagct ccaccggtc gagcttctg  
42421 ttggcggta gcagagatc gcctcaatg ccgaaggtaa tgtacttgc cttgacaagg  
42481 ccgttgttc ctttggtgag ctgggttgc agcatatcc aatactcagc gcggatgtca  
42541 ttgaaagcat cgtctgttc ggggatgcgg attgcctt tgaactatt gatgttact  
42601 ctctgattga tgaaggagag ctgaacaaaa atggagctgt cgaagtagt caggaagtca  
42661 caccagtct caaagatggc ggtctgtcc tcgttctgg caagctgga attgatgtc  
42721 ttatagcga tggcttgg gtagaagcgg ctgtcacct tcagatacc gtcgcccac  
42781 atctccacat aaggatgt ctgctggcg gacttggga tttcttgc cttctgtc  
42841 ttttcttct gcatgacat ctgctctt tccgagcgg aaagagcat gccgtacac  
42901 ttgccattt tcacggtct ctaggcgt tctgcctt tgggtctgt tgtcaatct  
42961 caattctcc tgttcttga tttctgctg aatggcagc taaagattt ttgtcggta  
43021 gggacgacc ttgtccctca gaaacatgga ctgatcaca tgaccgagga tttttcagc  
43081 cggttgccg tccttctcat agagggcga gaagataaac gggagcatca gtacgacct  
43141 cagcattgct gccgtggaga tgccgaggct gggcttgg agaaagtaca tgggaacac  
43201 taccgagca gccagcga agcagatgat ctgccctt gtcaggtga acatgactt  
43261 ggtttcaca cggtaaggt cctcgggac cgtacgaat gccatttct gaaacctct  
43321 tccgagaga tacatcgtt tcaactctg tccccacac gtccatccc tccggggact

43381 gtctggcaaa aagctcaatc cgtggaagat cgcccatgag ctgaacaatg cgttcacggg  
43441 cttcatccgg ctcttctgctg tgttctcca catggctgag gatgacctga cggacaccgg  
43501 cgttcacacg cctcggatgc ccctttgtgg caagaatgca gatttcggca tttgcacggg  
43561 tccagtagcc catgccggtg aagagatcat cgttcttccg gttctgcttc acccacacga  
43621 aagcgacggt tttatatgaa aatccccatg cctcaagcac ttcgagcgtc tcatagagac  
43681 atgggaatgt gatccacaga aacagagcgc agtctttggc ggcaagctca ccaacaggtg  
43741 aagccttaat gtcctcaatg ctcatcgttg gtagtggtt ttcgctgac cgtccctgtc  
43801 ttttcttga ataggtccga tacgccaag gcggatcggc ataatgatg ctgtactttt  
43861 tcatccgcc gacctctta atgcgcttg aacaacgact tcgagaggct gccggtctg  
43921 aacagcgaga agcacaggat gaccgtgtat gctgccaccg agaaaagagc cgagtgaatg  
43981 ttggctgcta tgatcatgtt gttgatgagt acggcgtaga tgccgacgca gatcatgatg  
44041 aggaagcctt ggaatgccag agcgaagaaga cccttgaggt aatttgtccc gatgctgccc  
44101 cattctcggg tgctcattgt agcaataggg atcggcgcaa tgctgacggt gcagtaaatt  
44161 tcgatcattc gtcgtacag gatgactgtg atcaggatag acatgatctt gaggcatagg  
44221 ctgatgacca gcgtttcaat ggcaagaccg agcagttcac caacacccat tgcttcata  
44281 ctggttcgca tgggtccag tgcgaggcg atatcaatat ttgtggtgcc gtgaatgact  
44341 ccggctgcmc cgcgaaccac ggactgtccg atgtcgaata ctgccatcac gatgtcaagg  
44401 gtattggtca cgaggtatg tgcaacagcc gcttgaaga accactgaa gaacatcaa  
44461 gtgtccatgt cgtgatatt gttttctcc gtgatcatgg agatcagctc gtaacacaaa  
44521 acgaaggtga taatgatacc ggcaatgggg actatcacgc ttcggatag tccccgatc  
44581 atcgtataga tgctccgtt ccatgtagaa ggggtcctgc cgacctctcc ggcaatcgtg  
44641 cctaccttct cattgacatc ggtgaacata ttggtcaggg tgctttcgtat catgccgatg  
44701 agcatttctc tgatggcttc tgtgatttt tctaagatac tgcccaatat ttcaccact  
44761 ttcggttaag ctgggcttgc tggattagaa caaacggac agcagaggga tcagcgtagt  
44821 tccgataacc accacaccgc cgccagccat gagctgcttg atgccctgac tcttagcgc  
44881 gggattgtca ttgccgtagc ctccatcaa gttgaccacg cccacacgg cgaggccagc  
44941 gccgaggcgc atgacgagag tctgtaaaac cgtgactgcc tgagtataa atgcatagg  
45001 ttatttctc cttattgtt tgaaaaatga agggaggcgc cgttctctgc gtctccctt  
45061 gagggggtgaa agggactgtc ggtatcagaa cagaccggac agcaaggga tgagggtggt  
45121 gccgatgaga accacgccgc cgccagccat gagctgcttg atgccctggc tcttggcgc  
45181 gggattgtca ttgccgtagc ctccatcag gttgaccacg cccacacgg cgagaccagc  
45241 accgagcgc atgacgagag tctgcaggac cgtgactgcc tgagtataa atgcataga  
45301 ttttctcctc tgatttcatg ttgtttttg aaaatgggca taaaaaagaa gcccgtcgc  
45361 ttttctgctt tgaaccttgc cgtcaggctc ggctcactgc gcagtgcagc gacggggctt  
45421 tagtcttctt tgatctctcc catatcatag agatcaaagg tgcggtggg cttgaccacc  
45481 agcttcggg agcgatattt ctgatgtca aaggcgttc gttatcgtg gtcagccagc  
45541 agtttgtatc ttggatgctt cgttatgtc tacttatcac tgagaaaagg tctcacgct  
45601 ctaagctgca agatacattt gctgccgtcc atgacggcga ttcgtcctg agacatcaac  
45661 tccttaccaa ctttctgata gttcagccc taggaattgt tgggtggaac ggtttccgaa  
45721 gtgtgtata ggtcaatcgt ttcctgccc agcactcgc tgattcttt cagggtggat  
45781 ttttcttctc cgccaggaa gagggtgcag tcgcagttgc ccgcaatcgt gtcagccgca  
45841 tcctttaga tggcttgag ctgggactgg gactgcaaga tgattgccgc cgagatttcc  
45901 cggctgcgga tgggtggcgt gagcttatcg aacttcgga tctggccgat atcgcaaac  
45961 tcgtccagaa gacagcggac atgaacaggc agtctgccgc cgtactcgtc atccgctta

46021 tcacagagca gattgaacat ctgagaatac atgatggcac agacgaaatt gaaggtgtca  
46081 tccgtatcgc tgatgatcac gaacagggcc gtttctctgt ctccgagggt gtccagctcc  
46141 aattcgtcgt agctcatcag ctcccgcagc tctgcaatgt caaagggagc aagtctggca  
46201 ccgagactaa tcaggatcga cttcgcagtc ttgccagccg ccaacttgta ttgacggta  
46261 tgcttcacag caaagtgatc cgggtccctc gcctccaact cgtcaaacat gatgtccacc  
46321 gggttttga agtttctgtc atcctctctg gcttccgaag cattgatcat ttcgagcaag  
46381 gtagtgaagt ttttctctg ttccgggtcc tctaccaga tgtaccgat gagggccgta  
46441 tagtagagct ttcagcctt caccacaaaa tcttcgccg acttatcgc gtctccctc  
46501 gtgtgacga taattgtatt gaccagctt aggatgtcct tctcgtcgc gatgtacgag  
46561 aacgggttat agtgcattga tttttgaag ttgatcgtg tcagcgactt gatcacatac  
46621 ccgttttct caagcattt gccggttcc accaagaggg tgcctttcgg atcgggtgact  
46681 atgaagctga ccggataatc cttcgagacg cactgcatga ggttgggctt cacacacacac  
46741 cgggttttgc cggaaactga accgcaatg accatgatgt tcttattccg ggcgtacttt  
46801 ggctgcttcg ggcggctgtt catggctcagc gcctcggctt gggttaaggat gacattgttc  
46861 tcaaaattat catccatata cggcctgata tcctctggct tgcccatcgc ggcagatccg  
46921 tattcttcgc cctgacggaa ctcttcgagc tttttgcctt tcacataaac cgcagcttg  
46981 agcaaagcgc ctgccgtac gccgatgagc aagtcaaccg gatgaaagct gggcagagga  
47041 tttgcaaatg ctgtcccga gttggcaaag cccccggtga gcttgcgat cagctcagtt  
47101 ccgggagcct gtctgaacac cgcagcaatt ttgtccacga aatagaacgc gaacacatac  
47161 gggaaagtga gaagaataag gcgtttggtg tcgagcttct tttcacagc tccacgcccc  
47221 gatccttggc cttgaccttg accttctct tctgcttggc cttggactgc tctgttcat  
47281 gggagagctt gcgccggaga gaaggctgtt cttctgctt gactgtcctt gcggaaaact  
47341 ccttgaagc ctgtgtcatc acatccacat cacgccctt gaagaatac atgtagcgtg  
47401 gcggctctc cgaagtgtc ttcttgagc catagtcaat cccgtattt ttggcgggtc  
47461 gctggaagga ctgatattt ccgtcggta cttcaatgtt gctgatggcg gcattctgag  
47521 ccacgagatg cttatggac tgcttgccc gtaggttctt aggctgagag gcggtttct  
47581 gagccttctc aatttctcc acaaacttct tgagagctt gtccagcacc tcagcagta  
47641 tttgccgcc cttaatcga atagcaaca ctttggatt tacttcatcc tgcattggaa  
47701 cctccttctc gagaatcgc agatcagttc aactaagg ttgtactctc cgataaaaaa  
47761 tgattgtcac gttgatacc tccttctgg gtggattact tctgaccgta gagatcatga  
47821 ttacaagag ccgaatagta gttgtccata gtcagggatg cgttatacag tgttggagc  
47881 atatatgctc tgatgttccg aatgtcggat gggcattcat ccattgatg aaggacatac  
47941 tctatatggc tgctgttgg cttgaggaaa cgggatttta ctacttgctg cggcatatcc  
48001 tcgccgttga tacggatagt gggacgagta gaacaaatc cgtccagcat aatctgatc  
48061 atttcattta cacggtcagt atcaaacgg tgatcctgag agagtattc aagctcaaga  
48121 ttatctcga taagtctc atctctgct ctttctcaa tccatccat cccatcaaga  
48181 ttgatagatt gatacttact caaagagtta ttttcttctt gagtaattac ttgattagta  
48241 tttattgtg ccggatttcc ctctgtgtt ttatccatgt ctggattatc cacatcggga  
48301 tttccatgt gtggactgcc cgtatctggt gataccggtt gtggctctc aatatgtc  
48361 aagattgtgc tgctcaatct gccttctg tcccgttgc gatgccggac gagatagccg  
48421 ttttctcaa gctctttaa ggctgagagg atggcatcgg gaccttctt gcagatcga  
48481 gacaagccgc gaggtaaaa cttccagcca tcgttaaacg acagcattt tgagagaaga  
48541 ccgactgcct tgaggacag gttttgtct cttagatgga agttcgacat aaccgtgtag  
48601 ttacgacttt tgtttacgcg gtagactgcc atgcgatcaa ctctccttg gtaagagagc

48661 tgcaagtca ttctgctttt tcatgtactt gagccgaatg atttctttgc ctttggcgt  
48721 gaaatatgtc tgtgatcctg tgaacgagaa ggtcacgaaa tcacgaacga tgaataagcc  
48781 ctctgtgctg tgcttgtgt acggaagaag ctgaccggaa ggagagcgaa acaggaattt  
48841 ctcttgaga agaaactgga cgaatttgcg ttccgggatt ttaagctcct tcgccgtcgt  
48901 tcgtatattg gtgcagtcac ccgattgat gaaagcatca aaatagtctg ctttgggctt  
48961 cgctttggat aactcagctt ccaatgccgt agcgcgtctt ctttctgcaa gaagcgcgtc  
49021 tgcaaactca aagatgacag cgggatcatt ttgaatgac tgcaataacg gctcggacaa  
49081 ataacctccc gtctttcggg tggcggggat gacctcatga gtgaccagc gtttgaaggc  
49141 tttgcttcg ggttttcgag aactgagaat aagcagtaa aggccagctt cgtttacaaa  
49201 agagagtgtt gatttgcgc ttgctgact atcattgaa atgatagtgg taaatctctc  
49261 gtcttctcc agtcggctaa gagcttgggg agcgttctt atctcaatg ctttacacac  
49321 atcagaagcg gcaaccaag gttcgccatc aatcagcgtt atgcggactg cgccaaactg  
49381 ttattctga aatactcaa tttgttctc catttgattt ttctttctg gcagcagtgc  
49441 tgtatgtgtt ttctttcgt gttgatacgg ggacgaggta ataagggcat tcctcaaaaa  
49501 cgcaggactg atatttcaa taaggcgcgt ggaatctgca tgaccggcat tccgggcaga  
49561 ttccatcgca gccgctatcg tagtggttat acggcgtttc tttcatcaat gcctcaaacg  
49621 ccaatgagca tccttccggg tacattttgc ttacctcat ttttgata gaaatagaaa  
49681 aagccccgtc attgttctg tacgcgcagt gcaataacgg ggcttccgt gtattaagtt  
49741 cttgcaggaa ttacagaaaa cttacggtt actgtttgga caaaatcagc gaaacacat  
49801 ttgaaggat attatatcaa gcaactgtga atgctgcgtg acatcattca tctctctggt  
49861 caaagaagct gcttatcaa ttttttaat tctttcaaga aagtcgaaac gaacagtaga  
49921 tgtcccaag attttcttg tatgccgat gagtatggcg atataagaaa ctccgcaaga  
49981 ccgattttg gaataataaa ctttctgaa attttgaagc caacgagctt cttggcatta  
50041 caccaacgat aaattgcagt gctgctgtaa ccggttattt ccattgttc ctcaacagac  
50101 acaaatcac cataagaggc aagttctgtt cgtgtgtatt cttcaaagag ttttcttca  
50161 atctccgata gactactcaa ctatattctg aatgtattc gtgatctccg ataacctgaa  
50221 cgatctgat accaatgatc cggcgcgcca ttttctcag gatgtattc acggtcaatc  
50281 aaataagta ttacatgctc ggtacggatt gtgtaccggc gtgtttttt gccagtgtcc  
50341 ttacaaggga ctaatccgtt ttgcagaaga tgaaggcgtg ttgctttgct gatgtgagct  
50401 atccggtaga actggtcttt ggagatcgtt tcaggatagg ctctgcggat agcatcatat  
50461 ttttctctg tttcagtcac gctgataacc accttttag gtattcggta caaggtaggt  
50521 gttatctgca tttatagggg tttgttctc cttgttctc cccaaaatcc ctttcaaac  
50581 tcgttttctc ccctgaatcg agcaaaagag gggattcatt cgaactcctt ttatatcaag  
50641 gtttttggc gtttgacacc agaaaagcct tgatattgct cacttttctg aagtccttca  
50701 ttgtccgcta agttccccta tttctctaa agttccaaag cctgactatg actcgaaatg  
50761 cggtaggtcg ggtaaccggc gcgaggggtc aaatccctc atctccgtct aaggaaaaag  
50821 ctgattccc gcctgtgatt caaggcggga atgcagctt tttaaatata ccacagtggg  
50881 ttaattgtc tcctccgcc acgatttctt ccaataccg gattaatcg aaaactgttt  
50941 ccaggcggac gttgcgttcc aggatacagt ttttaaatc gatagacaga gactcaaat  
51001 tgtcccgac tgccgggat acataggatg ccat

//

DEFINITION Integrative and mobilisable element IME\_5

CDS 1..1548

/color=8

```

/locus_tag="C83_00259"
/note="Methyl-accepting chemotaxis protein HAMP
domain-containing protein, similar to AA
sequence:UniProtKB:P05704 protein motif:CLUSTERS:PRK15048
protein motif:Pfam:PF00015.15"
/product="Methyl-accepting chemotaxis protein HAMP
domain-containing protein [two-component system]"
/"ID=C83_00259
/protein_id="gnl|SC|C83_00259""
/codon_start=1
fasta_record 1..129008
/ID=C83|SC|contig000001
/colour=5
CDS complement(2254..3657)
/color=9
/locus_tag="C83_00260"
/note="Tyrosine recombinase, protein
motif:CLUSTERS:PRK00236 protein motif:Cdd:COG4974 protein
motif:TIGRFAMs:TIGR02224 protein motif:Pfam:PF00589.16"
/product="Tyrosine recombinase [recombinase]"
/"ID=C83_00260
/protein_id="gnl|SC|C83_00260""
/codon_start=1
CDS complement(3675..4544)
/color=9
/locus_tag="C83_00261"
/note="DNA binding domain excisionase family
Helix-turn-helix domain, protein motif:TIGRFAMs:TIGR01764
protein motif:Pfam:PF12728.1"
/product="DNA binding domain excisionase family
Helix-turn-helix domain [excisionase]"
/"ID=C83_00261
/protein_id="gnl|SC|C83_00261""
/codon_start=1
CDS complement(4656..4874)
/color=9
/locus_tag="C83_00262"
/note="DNA binding domain excisionase family
Helix-turn-helix domain , protein motif:TIGRFAMs:TIGR01764
protein motif:Pfam:PF12728.1"
/product="DNA binding domain excisionase family
Helix-turn-helix domain [excisionase]"
/"ID=C83_00262
/protein_id="gnl|SC|C83_00262""

```



CDS        /codon\_start=1  
           complement(4921..5319)  
           /color=8  
           /locus\_tag="C83\_00263"  
           /note="Type II toxin-antitoxin system PemK/MazF family  
           toxin MazF, similar to AA sequence:UniProtKB:Q7A4G9  
           protein motif:Pfam:PF02452.11"  
           /product="Type II toxin-antitoxin system PemK/MazF family  
           toxin MazF [toxin-antitoxin]"  
           /"ID=C83\_00263  
           /protein\_id="gnl|SC|C83\_00263""  
           /gene="mazF"  
 CDS        /codon\_start=1  
           complement(5772..6440)  
           /ID=C83\_00264  
           /color=4  
           /locus\_tag="C83\_00264"  
           /note="Membrane protein trbL/VirB6 plasmid conjugal  
           transfer family protein"  
           /product="Membrane protein trbL/VirB6 plasmid conjugal  
           transfer family protein"  
           /protein\_id="gnl|SC|C83\_00264"  
 CDS        /codon\_start=1  
           complement(6641..8257)  
           /ID=C83\_00265  
           /color=9  
           /locus\_tag="C83\_00265"  
           /note="Serine recombinase"  
           /product="Serine recombinase [recombinase]"  
           /protein\_id="gnl|SC|C83\_00265"  
 CDS        /codon\_start=1  
           8483..8683  
           /ID=C83\_00266  
           /color=8  
           /locus\_tag="C83\_00266"  
           /note="GNAT family n-acetyltransferase"  
           /product="GNAT family n-acetyltransferase"  
           /protein\_id="gnl|SC|C83\_00266"  
           /codon\_start=1  
 CDS        complement(8748..8942)  
           /ID=C83\_00267  
           /color=9  
           /locus\_tag="C83\_00267"  
           /note="Transposon-encoded protein TnpW"

```

/product="Transposon-encoded protein TnpW"
/gene="tnpW"
/protein_id="gnl|SC|C83_00267"
/codon_start=1
CDS    complement(8957..9799)
/color=10
/locus_tag="C83_00268"
/note="Primosomal protein Dnal ATP-binding protein,
similar to AA sequence:UniProtKB:P06567 protein
motif:CLUSTERS:PRK08116 protein motif:Cdd:COG1484 protein
motif:TIGRFAMs:TIGR00362 protein motif:Pfam:PF01695.11"
/product="Primosomal protein Dnal ATP-binding protein
[replication]"
/"ID=C83_00268
/"
/protein_id="gnl|SC|C83_00268"
/gene="dnal"
/codon_start=1
CDS    complement(9796..10647)
/ID=C83_00269
/color=10
/locus_tag="C83_00269"
/note="Replication initiation protein RepA [replication]"
/product="Replication initiation protein RepA
[replication]"
/gene="repA"
/protein_id="gnl|SC|C83_00269"
/codon_start=1
CDS    complement(10663..11049)
/ID=C83_00270
/color=1
/locus_tag="C83_00270"
/note="Cysteine-rich VLP domain-containing protein"
/product="Cysteine-rich VLP domain-containing protein"
/protein_id="gnl|SC|C83_00270"
/codon_start=1
CDS    complement(11039..12664)
/ID=C83_00271
/color=4
/locus_tag="C83_00271"
/note="Relaxase/Mobilisation nuclease domain [relaxase]"
/product="Relaxase/Mobilisation nuclease domain
[relaxase]"
/protein_id="gnl|SC|C83_00271"

```

/codon\_start=1  
 CDS complement(12636..13034)  
 /ID=C83\_00272  
 /color=4  
 /locus\_tag="C83\_00272"  
 /note="Plasmid mobilisation relaxosome protein MobC  
 [relaxosome]"  
 /product="Plasmid mobilisation relaxosome protein MobC  
 [relaxosome]"  
 /gene="mobC"  
 /protein\_id="gnl|SC|C83\_00272"  
 /codon\_start=1  
 CDS complement(13532..13744)  
 /ID=C83\_00273  
 /color=7  
 /locus\_tag="C83\_00273"  
 /note="Helix-turn-helix domain-containing protein  
 [transcriptional regulator]"  
 /product="Helix-turn-helix domain-containing protein  
 [transcriptional regulator]"  
 /protein\_id="gnl|SC|C83\_00273"  
 /codon\_start=1  
 CDS complement(13737..14159)  
 /ID=C83\_00274  
 /color=7  
 /locus\_tag="C83\_00274"  
 /note="RNA polymerase sigma factor Sigma-70 region 4  
 [transcriptional regulator]"  
 /product="RNA polymerase sigma factor Sigma-70 region 4  
 [transcriptional regulator]"  
 /protein\_id="gnl|SC|C83\_00274"  
 /codon\_start=1  
 CDS complement(14331..15098)  
 /color=8  
 /locus\_tag="C83\_00275"  
 /eC\_number=2.1.1.197  
 /note="Malonyl-CoA O-methyltransferase BioC, similar to AA  
 sequence:UniProtKB:P36571 protein motif:CLUSTERS:PRK08317  
 protein motif:Cdd:COG4106 protein motif:TIGRFAMs:TIGR02072  
 protein motif:Pfam:PF12847.1"  
 /product="Malonyl-CoA O-methyltransferase BioC  
 [methyltransferase]"  
 /ID=C83\_00275  
 /protein\_id="gnl|SC|C83\_00275""

/gene="bioC"  
 /codon\_start=1  
 CDS complement(15149..17068)  
 /color=2  
 /locus\_tag="C83\_00276"  
 /note="Tetracycline resistance protein tetM from  
 transposon Tn916, similar to AA sequence:UniProtKB:P21598  
 protein motif:CLUSTERS:PRK13351 protein motif:Cdd:COG0050  
 protein motif:TIGRFAMs:TIGR00484 protein  
 motif:Pfam:PF00009.21"  
 /product="Tetracycline resistance protein tetM from  
 transposon Tn916 [antibiotic resistance]"  
 /"ID=C83\_00276  
 /"  
 /protein\_id="gnl|SC|C83\_00276"  
 /gene="tetM"  
 /codon\_start=1  
 CDS complement(17709..17849)  
 /ID=C83\_00277  
 /color=4  
 /locus\_tag="C83\_00277"  
 /note="Maff2 family conjugal transfer protein"  
 /product="Maff2 family conjugal transfer protein"  
 /protein\_id="gnl|SC|C83\_00277"  
 /codon\_start=1  
 CDS complement(18048..19103)  
 /ID=C83\_00278  
 /color=8  
 /locus\_tag="C83\_00278"  
 /note="PHP polymerase and histidinol phosphatase  
 domain-containing protein"  
 /product="PHP %28polymerase and histidinol phosphatase%29  
 domain-containing protein"  
 /protein\_id="gnl|SC|C83\_00278"  
 /codon\_start=1  
 CDS complement(19133..20179)  
 /color=8  
 /locus\_tag="C83\_00279"  
 /note="Fic Filamentation induced by cAMP family protein,  
 similar to AA sequence:UniProtKB:Q9K0V1 protein  
 motif:Cdd:COG2184 protein motif:TIGRFAMs:TIGR02613 protein  
 motif:Pfam:PF02661.12"  
 /product="Fic %28Filamentation induced by cAMP%29 family  
 protein [post-translational modification]"

```

/"ID=C83_00279
/"
/protein_id="gnl|SC|C83_00279"
/codon_start=1
CDS    complement(20427..20915)
/color=8
/locus_tag="C83_00280"
/note="Cysteine hydrolase family protein
Nicotinamidase-related amidase, protein
motif:CLUSTERS:PRK11609 protein motif: Pfam:PF00857.14"
/product="Cysteine hydrolase family protein
Nicotinamidase-related amidase [hydrolase]"
/"ID=C83_00280
/"
/protein_id="gnl|SC|C83_00280"
/codon_start=1
CDS    complement(20912..21571)
/color=7
/locus_tag="C83_00281"
/note="Transcriptional regulator Uncharacterized conserved
protein Uncharacterized conserved protein DUF2174, protein
motif:Cdd:COG4832 protein motif: Pfam:PF09942.3"
/product="Transcriptional regulator Uncharacterized
conserved protein Uncharacterized conserved protein
%28DUF2174%29"
/"ID=C83_00281
/"
/protein_id="gnl|SC|C83_00281"
/codon_start=1
CDS    complement(21574..22491)
/color=7
/locus_tag="C83_00282"
/note="YafY family transcriptional regulator HTH and WYL
domain-containing, protein motif: Pfam:PF08279.6"
/product="YafY family transcriptional regulator HTH and
WYL domain-containing [transcriptional regulator]"
/"ID=C83_00282
/"
/protein_id="gnl|SC|C83_00282"
/codon_start=1
CDS    complement(22836..24452)
/color=9
/locus_tag="C83_00283"
/note="Serine recombinase, protein motif: Pfam:PF07508.7"

```

```

        /product="Serine recombinase [recombinase]"
        /"ID=C83_00283
        /"
        /protein_id="gnl|SC|C83_00283"
        /codon_start=1
CDS     24678..24878
        /ID=C83_00284
        /color=8
        /locus_tag="C83_00284"
        /note="GNAT family n-acetyltransferase"
        /product="GNAT family n-acetyltransferase"
        /protein_id="gnl|SC|C83_00284"
        /codon_start=1
CDS     complement(24943..25137)
        /ID=C83_00285
        /color=9
        /locus_tag="C83_00285"
        /note="Transposon-encoded protein TnpW"
        /product="Transposon-encoded protein TnpW"
        /protein_id="gnl|SC|C83_00285"
        /gene="tnpW"
        /codon_start=1
CDS     complement(25152..25994)
        /color=10
        /locus_tag="C83_00286"
        /note="rimosomal protein Dnal ATP-binding protein,
        similar to AA sequence:UniProtKB:P06567 protein
        motif:CLUSTERS:PRK08116 protein motif:Cdd:COG1484 protein
        motif:TIGRFAMs:TIGR00362 protein motif:Pfam:PF01695.11"
        /product="rimosomal protein Dnal ATP-binding protein
        [replication]"
        /"ID=C83_00286
        /"
        /protein_id="gnl|SC|C83_00286"
        /gene="dnal"
        /codon_start=1
CDS     complement(25991..26842)
        /color=10
        /locus_tag="C83_00287"
        /note="Replication initiation protein RepA, protein
        motif:Pfam:PF06970.5"
        /product="Replication initiation protein RepA
        [replication]"
        /"ID=C83_00287

```

```

/"
/protein_id="gnl|SC|C83_00287"
/gene="repA"
/codon_start=1
CDS    complement(26858..27244)
/ID=C83_00288
/color=1
/locus_tag="C83_00288"
/note="Cysteine-rich VLP domain-containing protein"
/product="Cysteine-rich VLP domain-containing protein"
/protein_id="gnl|SC|C83_00288"
/codon_start=1
CDS    complement(27234..28859)
/color=4
/locus_tag="C83_00289"
/note="Relaxase/Mobilisation nuclease domain [relaxase],
protein motif:Pfam:PF03432.8"
/product="Relaxase/Mobilisation nuclease domain
[relaxase]"
/ID=C83_00289
/"
/protein_id="gnl|SC|C83_00289"
/codon_start=1
CDS    complement(28831..29229)
/color=4
/locus_tag="C83_00290"
/note="Plasmid mobilisation relaxosome protein MobC
[relaxosome], protein motif:Pfam:PF05713.5"
/product="Plasmid mobilisation relaxosome protein MobC
[relaxosome]"
/ID=C83_00290
/"
/protein_id="gnl|SC|C83_00290"
/gene="mobC"
/codon_start=1
CDS    complement(29727..29939)
/color=7
/locus_tag="C83_00291"
/note="helix-turn-helix domain-containing protein
[transcriptional regulator], protein motif:Pfam:PF12645.1"
/product="helix-turn-helix domain-containing protein
[transcriptional regulator]"
/ID=C83_00291
/"

```

```

/protein_id="gnl|SC|C83_00291"
/codon_start=1
CDS    complement(29932..30354)
/color=7
/locus_tag="C83_00292"
/note="RNA polymerase sigma factor Sigma-70 region 4,
protein motif:TIGRFAMs:TIGR03001"
/product="RNA polymerase sigma factor Sigma-70 region 4"
/"ID=C83_00292
/"
/protein_id="gnl|SC|C83_00292"
/codon_start=1
CDS    complement(30526..31293)
/color=8
/locus_tag="C83_00293"
/eC_number=2.1.1.197
/note="Malonyl-CoA O-methyltransferase BioC, similar to AA
sequence:UniProtKB:P36571 protein motif:CLUSTERS:PRK08317
protein motif:Cdd:COG4106 protein motif:TIGRFAMs:TIGR02072
protein motif:Pfam:PF12847.1"
/product="Malonyl-CoA O-methyltransferase BioC
[methyltransferase]"
/"ID=C83_00293
/protein_id="gnl|SC|C83_00293""
/gene="bioC"
/codon_start=1
CDS    complement(31344..33263)
/color=2
/locus_tag="C83_00294"
/note="Tetracycline resistance protein tetM from
transposon Tn916, similar to AA sequence:UniProtKB:P21598
protein motif:CLUSTERS:PRK13351 protein motif:Cdd:COG0050
protein motif:TIGRFAMs:TIGR00484 protein
motif:Pfam:PF00009.21"
/product="Tetracycline resistance protein tetM from
transposon Tn916 [antibiotic resistance]"
/"ID=C83_00294
/"
/protein_id="gnl|SC|C83_00294"
/gene="tetM_2"
/codon_start=1
CDS    complement(33904..34044)
/color=4
/locus_tag="C83_00295"

```



/note="Maff2 family conjugal transfer protein, protein motif: Pfam:PF12750.1"  
 /product="Maff2 family conjugal transfer protein"  
 /"ID=C83\_00295  
 /"  
 /protein\_id="gnl|SC|C83\_00295"  
 /codon\_start=1  
 CDS complement(34223..34411)  
 /color=8  
 /locus\_tag="C83\_00296"  
 /note="PHP polymerase and histidinol phosphatase domain-containing protein, ab initio prediction:Prodigal:2.60"  
 /product="PHP %28polymerase and histidinol phosphatase%29 domain-containing protein"  
 /"ID=C83\_00296  
 /"  
 /protein\_id="gnl|SC|C83\_00296"  
 /codon\_start=1  
 CDS complement(34420..34947)  
 /ID=C83\_00297  
 /color=8  
 /locus\_tag="C83\_00297"  
 /note="Fic Filamentation induced by cAMP family protein [post-translational modification]"  
 /product="Fic %28Filamentation induced by cAMP%29 family protein [post-translational modification]"  
 /protein\_id="gnl|SC|C83\_00297"  
 /codon\_start=1  
 CDS complement(34962..35186)  
 /ID=C83\_00298  
 /color=4  
 /locus\_tag="C83\_00298"  
 /note="Type IV secretory pathway VirD4 components [coupling protein]"  
 /product="Type IV secretory pathway VirD4 components [coupling protein]"  
 /protein\_id="gnl|SC|C83\_00298"  
 /codon\_start=1  
 CDS complement(35230..36708)  
 /color=4  
 /locus\_tag="C83\_00299"  
 /note="Type IV secretion system protein TraG VirD4 component [coupling protein], protein

motif:CLUSTERS:PRK13876 protein motif:Cdd:COG3505 protein  
 motif:TIGRFAMs:TIGR02759 protein motif:Pfam:PF02534.8"  
 /product="Type IV secretion system protein TraG VirD4  
 component [coupling protein]"  
 /"ID=C83\_00299  
 /"  
 /protein\_id="gnl|SC|C83\_00299"  
 /gene="traG"  
 /codon\_start=1  
 CDS     complement(36705..37196)  
 /color=1  
 /locus\_tag="C83\_00300"  
 /note="PcfB family protein, protein motif:Pfam:PF12687.1"  
 /product="PcfB family protein"  
 /"ID=C83\_00300  
 /"  
 /protein\_id="gnl|SC|C83\_00300"  
 /codon\_start=1  
 CDS     complement(37231..37578)  
 /ID=C83\_00301  
 /color=1  
 /locus\_tag="C83\_00301"  
 /note="hypothetical protein"  
 /product="hypothetical protein"  
 /protein\_id="gnl|SC|C83\_00301"  
 /codon\_start=1  
 CDS     complement(37603..39024)  
 /color=7  
 /locus\_tag="C83\_00302"  
 /note="Transcriptional regulator AAA family ATPase,  
 protein motif:Pfam:PF12957.1"  
 /product="Transcriptional regulator AAA family ATPase  
 [transcriptional regulator]"  
 /"ID=C83\_00302  
 /"  
 /protein\_id="gnl|SC|C83\_00302"  
 /codon\_start=1  
 CDS     complement(39028..39627)  
 /ID=C83\_00303  
 /color=1  
 /locus\_tag="C83\_00303"  
 /note="hypothetical protein"  
 /product="hypothetical protein"  
 /protein\_id="gnl|SC|C83\_00303"

/codon\_start=1  
 CDS complement(39716..40642)  
 /color=10  
 /locus\_tag="C83\_00304"  
 /note="ParB/RepB/Spo0J family partition protein ParB-like  
 nuclease domain [partitioning system], similar to AA  
 sequence:UniProtKB:Q83AH2 protein motif:CLUSTERS:PRK13832  
 protein motif:TIGRFAMs:TIGR00180 protein  
 motif:Pfam:PF02195.12"  
 /product="ParB/RepB/Spo0J family partition protein  
 ParB-like nuclease domain [partitioning system]"  
 /"ID=C83\_00304  
 /"  
 /protein\_id="gnl|SC|C83\_00304"  
 /gene="parB"  
 /codon\_start=1  
 CDS complement(40599..41423)  
 /color=10  
 /locus\_tag="C83\_00305"  
 /note="plasmid-partitioning protein A [partitioning  
 system], similar to AA sequence:UniProtKB:P37522 protein  
 motif:CLUSTERS:PRK13869 protein motif:Cdd:COG2894 protein  
 motif:TIGRFAMs:TIGR03453 protein motif:Pfam:PF01656.17"  
 /product="plasmid-partitioning protein A [partitioning  
 system]"  
 /"ID=C83\_00305  
 /"  
 /protein\_id="gnl|SC|C83\_00305"  
 /gene="parA"  
 /codon\_start=1  
 CDS complement(41436..42329)  
 /color=10  
 /locus\_tag="C83\_00306"  
 /note="Replication initiation protein RepA [replication],  
 protein motif:Pfam:PF06970.5"  
 /product="Replication initiation protein RepA  
 [replication]"  
 /"ID=C83\_00306  
 /"  
 /gene="repA"  
 /protein\_id="gnl|SC|C83\_00306"  
 /codon\_start=1  
 CDS complement(42349..42573)  
 /ID=C83\_00307

```

/color=1
/locus_tag="C83_00307"
/note="hypothetical protein"
/product="hypothetical protein"
/protein_id="gnl|SC|C83_00307"
/codon_start=1
CDS    complement(42566..42868)
/ID=C83_00308
/color=1
/locus_tag="C83_00308"
/note="hypothetical protein"
/product="hypothetical protein"
/protein_id="gnl|SC|C83_00308"
/codon_start=1
CDS    complement(42868..43038)
/ID=C83_00309
/color=1
/locus_tag="C83_00309"
/note="hypothetical protein"
/product="hypothetical protein"
/protein_id="gnl|SC|C83_00309"
/codon_start=1
CDS    43106..44287
/color=9
/locus_tag="C83_00310"
/note="ISL3 family transposase [DDE recombinase], protein
motif:Cdd:COG3464 protein motif:Pfam:PF01610.11"
/product="ISL3 family transposase [DDE recombinase]"
/"ID=C83_00310
/"
/protein_id="gnl|SC|C83_00310"
/codon_start=1
CDS    complement(44470..45213)
/color=1
/locus_tag="C83_00311"
/note="DUF5131 family protein, protein motif:Cdd:COG4422
protein motif:Pfam:PF07505.5"
/product="DUF5131 family protein"
/"ID=C83_00311
/"
/protein_id="gnl|SC|C83_00311"
/codon_start=1
CDS    complement(46022..46327)
/ID=C83_00312

```

```

/color=1
/locus_tag="C83_00312"
/note="hypothetical protein"
/product="hypothetical protein"
/protein_id="gnl|SC|C83_00312"
/codon_start=1
CDS    complement(46413..47786)
/color=9
/locus_tag="C83_00313"
/note="Integrase Tyrosine recombinase [recombinase],
similar to AA sequence:UniProtKB:P22886 protein
motif:CLUSTERS:PRK00236 protein motif:Cdd:COG4974 protein
motif:TIGRFAMs:TIGR02224 protein motif:Pfam:PF00589.16"
/product="Integrase Tyrosine recombinase [recombinase]"
/"ID=C83_00313
/"
/protein_id="gnl|SC|C83_00313"
/gene="Int-Tn"
/codon_start=1
CDS    complement(47791..48414)
/color=9
/locus_tag="C83_00314"
/note="DNA binding domain excisionase family
Helix-turn-helix domain [excisionase], protein
motif:Cdd:COG3311 protein motif:TIGRFAMs:TIGR01764 protein
motif:Pfam:PF12728.1"
/product="DNA binding domain excisionase family
Helix-turn-helix domain [excisionase]"
/"ID=C83_00314
/"
/protein_id="gnl|SC|C83_00314"
/codon_start=1
CDS    complement(48532..48768)
/color=9
/locus_tag="C83_00315"
/note="DNA binding domain excisionase family
Helix-turn-helix domain [excisionase], protein
motif:TIGRFAMs:TIGR01764 protein motif:Pfam:PF12728.1"
/product="DNA binding domain excisionase family
Helix-turn-helix domain [excisionase]"
/"ID=C83_00315
/"
/protein_id="gnl|SC|C83_00315"
/codon_start=1

```

CDS complement(48775..49182)  
 /color=8  
 /locus\_tag="C83\_00316"  
 /eC\_number=3.1.-.-  
 /note="Type II toxin-antitoxin system PemK/MazF family toxin MazF, similar to AA sequence:UniProtKB:P96622 protein motif:CLUSTERS:PRK09907 protein motif:Pfam:PF02452.11"  
 /product="Type II toxin-antitoxin system PemK/MazF family toxin MazF [toxin-antitoxin]"  
 /"ID=C83\_00316  
 /protein\_id="gnl|SC|C83\_00316""  
 /gene="mazF"  
 /codon\_start=1

CDS complement(49697..49912)  
 /color=8  
 /locus\_tag="C83\_00317"  
 /note="Antitoxin PezA XRE family HTH domain [toxin-antitoxin], similar to AA sequence:UniProtKB:Q97QZ2 protein motif:CLUSTERS:PRK08154 protein motif:Cdd:COG3800 protein motif:TIGRFAMs:TIGR03070 protein motif:Pfam:PF12844.1"  
 /product="Antitoxin PezA XRE family HTH domain [toxin-antitoxin]"  
 /"ID=C83\_00317  
 /"  
 /protein\_id="gnl|SC|C83\_00317"  
 /gene="pezA"  
 /codon\_start=1

CDS complement(50264..50827)  
 /ID=C83\_00318  
 /color=7  
 /locus\_tag="C83\_00318"  
 /note="Phage transcriptional regulator ArpU family [transcriptional regulator]"  
 /product="Phage transcriptional regulator ArpU family [transcriptional regulator]"  
 /protein\_id="gnl|SC|C83\_00318"  
 /codon\_start=1

CDS 51114..51563  
 /color=7  
 /locus\_tag="C83\_00319"  
 /note="helix-turn-helix HTH transcriptional regulator containing a XRE family HTH domain [transcriptional

```

regulator], protein motif:CLUSTERS:PRK09706 protein
motif:Pfam:PF12844.1"
/product="helix-turn-helix %28HTH%29 transcriptional
regulator containing a XRE family HTH domain
[transcriptional regulator]"
/"ID=C83_00319
/"
/protein_id="gnl|SC|C83_00319"
/codon_start=1
CDS    51615..52169
/color=8
/locus_tag="C83_00320"
/note="ImmA/IrrE family metallo-endopepidase, similar to
AA sequence:UniProtKB:P96630 protein motif:Pfam:PF06114.7"
/product="ImmA/IrrE family metallo-endopepidase
[pepidase]"
/"ID=C83_00320
/protein_id="gnl|SC|C83_00320""
/gene="immA"
/codon_start=1
CDS    complement(52314..53285)
/color=8
/locus_tag="C83_00321"
/note="Alpha/beta hydrolase [hydrolase], similar to AA
sequence:UniProtKB:Q01609 protein motif:Cdd:COG4925
protein motif:Pfam:PF12695.1"
/product="Alpha/beta hydrolase [hydrolase]"
/"ID=C83_00321
/"
/protein_id="gnl|SC|C83_00321"
/codon_start=1
CDS    complement(53288..53899)
/color=8
/locus_tag="C83_00322"
/note="4-carboxymuconolactone decarboxylase
[carboxy-lyase], protein motif:TIGRFAMs:TIGR02425 protein
motif:Pfam:PF02627.1"
/product="4-carboxymuconolactone decarboxylase
[carboxy-lyase]"
/"ID=C83_00322
/"
/protein_id="gnl|SC|C83_00322"
/gene="pcaC"
/codon_start=1

```

CDS complement(53951..54052)  
 /ID=C83\_00323  
 /color=8  
 /locus\_tag="C83\_00323"  
 /note="carboxymuconolactone decarboxylase family protein [carboxyl-lyase]"  
 /product="carboxymuconolactone decarboxylase family protein [carboxyl-lyase]"  
 /protein\_id="gnl|SC|C83\_00323"  
 /codon\_start=1

CDS complement(54056..54595)  
 /color=8  
 /locus\_tag="C83\_00324"  
 /note="Flavodoxin family protein [electron-transfer], similar to AA sequence:UniProtKB:Q188R7 protein motif:CLUSTERS:PRK03767 protein motif:Cdd:COG0431 protein motif:TIGRFAMs:TIGR03567 protein motif:Pfam:PF03358.9"  
 /product="Flavodoxin family protein [electron-transfer]"  
 /"ID=C83\_00324  
 /"  
 /protein\_id="gnl|SC|C83\_00324"  
 /codon\_start=1

CDS 54702..55139  
 /color=7  
 /locus\_tag="C83\_00325"  
 /note="HTH-type transcriptional regulator AdhR response to aldehyde stress [transcriptional regulator], similar to AA sequence:UniProtKB:O06008 protein motif:CLUSTERS:PRK09514 protein motif:Cdd:COG4978 protein motif:TIGRFAMs:TIGR02043 protein motif:Pfam:PF00376.17"  
 /product="HTH-type transcriptional regulator AdhR response to aldehyde stress [transcriptional regulator]"  
 /"ID=C83\_00325  
 /"  
 /protein\_id="gnl|SC|C83\_00325"  
 /gene="adhR"  
 /codon\_start=1

CDS complement(55272..56690)  
 /ID=C83\_00326  
 /color=1  
 /locus\_tag="C83\_00326"  
 /note="hypothetical protein"  
 /product="hypothetical protein"  
 /protein\_id="gnl|SC|C83\_00326"



CDS        /codon\_start=1  
            complement(56842..57870)  
            /ID=C83\_00327  
            /color=1  
            /locus\_tag="C83\_00327"  
            /note="hypothetical protein"  
            /product="hypothetical protein"  
            /protein\_id="gnl|SC|C83\_00327"  
            /codon\_start=1

CDS        complement(57909..58256)  
            /color=1  
            /locus\_tag="C83\_00328"  
            /note="MmcQ/YjbR family DNA-binding protein, protein  
            motif:CLUSTERS:PRK10250 protein motif:Cdd:COG2315 protein  
            motif:Pfam:PF04237.7"  
            /product="MmcQ/YjbR family DNA-binding protein"  
            /"ID=C83\_00328  
            /"  
            /protein\_id="gnl|SC|C83\_00328"  
            /codon\_start=1

CDS        complement(58295..61357)  
            /color=8  
            /locus\_tag="C83\_00329"  
            /eC\_number=3.1.21.3  
            /note="Type 1 restriction endonuclease subunit R, similar  
            to AA sequence:UniProtKB:Q7A801 protein  
            motif:TIGRFAMs:TIGR00348 protein motif:Pfam:PF11867.2"  
            /product="Type 1 restriction endonuclease subunit R  
            [restriction modification]"  
            /"ID=C83\_00329  
            /protein\_id="gnl|SC|C83\_00329""  
            /gene="hsdR"  
            /codon\_start=1

CDS        complement(61471..62652)  
            /color=8  
            /locus\_tag="C83\_00330"  
            /note="Type I restriction enzyme EcoKI subunit S  
            [restriction modification], protein  
            motif:CLUSTERS:PRK09737 protein motif:Cdd:COG1708 protein  
            motif:Pfam:PF01420.13"  
            /product="Type I restriction enzyme EcoKI subunit S  
            [restriction modification]"  
            /"ID=C83\_00330  
            /"

```

    /gene="hsdS"
    /protein_id="gnl|SC|C83_00330"
    /codon_start=1
CDS     complement(62642..64147)
    /color=8
    /locus_tag="C83_00331"
    /eC_number=2.1.1.72
    /note="Type I restriction enzyme EcoKI subunit M, similar
to AA sequence:UniProtKB:Q89Z59 protein motif:Cdd:COG0286
protein motif:TIGRFAMs:TIGR00497 protein
motif:Pfam:PF02384.10"
    /product="Type I restriction enzyme EcoKI subunit M
[restriction modification]"
    /"ID=C83_00331
    /protein_id="gnl|SC|C83_00331""
    /gene="hsdM"
    /codon_start=1
CDS     complement(64236..64448)
    /color=7
    /locus_tag="C83_00332"
    /note="helix-turn-helix transcriptional regulator
containing a XRE family HTH domain [transcriptional
regulator], protein motif:Cdd:COG3655 protein
motif:Pfam:PF01381.16"
    /product="helix-turn-helix transcriptional regulator
containing a XRE family HTH domain [transcriptional
regulator]"
    /"ID=C83_00332
    /"
    /protein_id="gnl|SC|C83_00332"
    /codon_start=1
CDS     complement(64829..66502)
    /color=9
    /locus_tag="C83_00333"
    /note="Serin recombinase [recombinase], protein
motif:Pfam:PF00239.15"
    /product="Serin recombinase [recombinase]"
    /"ID=C83_00333
    /"
    /protein_id="gnl|SC|C83_00333"
    /codon_start=1
CDS     complement(66580..66753)
    /ID=C83_00334
    /color=9

```

```

/locus_tag="C83_00334"
/note="Transposon-encoded protein TnpW"
/product="Transposon-encoded protein TnpW"
/gene="tnpW"
/protein_id="gnl|SC|C83_00334"
/codon_start=1
CDS    complement(67212..67454)
/color=7
/locus_tag="C83_00335"
/note="helix-turn-helix domain-containing protein
[transcriptional regulator], protein motif: Pfam:PF12645.1"
/product="helix-turn-helix domain-containing protein
[transcriptional regulator]"
/"ID=C83_00335
/"
/protein_id="gnl|SC|C83_00335"
/codon_start=1
CDS    complement(67438..67875)
/color=7
/locus_tag="C83_00336"
/note="RNA polymerase sigma factor Sigma-70 region 4,
protein motif: CLUSTERS:PRK11924 protein
motif: TIGRFAMs:TIGR02937 protein motif: Pfam:PF08281.6"
/product="RNA polymerase sigma factor Sigma-70 region 4"
/"ID=C83_00336
/"
/protein_id="gnl|SC|C83_00336"
/codon_start=1
CDS    complement(68345..69331)
/color=8
/locus_tag="C83_00337"
/eC_number=2.1.1.192
/note="23S rRNA adenine-C-methyltransferase RlmN, similar
to AA sequence: UniProtKB:Q7A600 protein
motif: CLUSTERS:PRK14469 protein motif: TIGRFAMs:TIGR00048
protein motif: Pfam:PF04055.15"
/product="23S rRNA
%28adenine%282503%29-C%282%29%29-methyltransferase RlmN
[methyltransferase]"
/"ID=C83_00337
/protein_id="gnl|SC|C83_00337""
/gene="rlmN"
/codon_start=1
CDS    69583..70830

```

```

/color=9
/locus_tag="C83_00338"
/note="ISL3 family transposase, protein motif:Cdd:COG3464
protein motif:Pfam:PF01610.11"
/product="ISL3 family transposase"
/"ID=C83_00338
/"
/protein_id="gnl|SC|C83_00338"
/codon_start=1
CDS    complement(70861..72081)
/color=2
/locus_tag="C83_00339"
/note="Macrolide efflux protein A Major Facilitator
Superfamily [antibiotic resistance], similar to AA
sequence:UniProtKB:P64783 protein motif:CLUSTERS:PRK10489
protein motif:Cdd:COG2814 protein motif:TIGRFAMs:TIGR00900
protein motif:Pfam:PF07690.10"
/product="Macrolide efflux protein A Major Facilitator
Superfamily [antibiotic resistance]"
/"ID=C83_00339
/"
/gene="mefA"
/protein_id="gnl|SC|C83_00339"
/codon_start=1
CDS    complement(73086..73352)
/ID=C83_00340
/color=4
/locus_tag="C83_00340"
/note="Conjugative transposon membrane protein"
/product="Conjugative transposon membrane protein"
/protein_id="gnl|SC|C83_00340"
/codon_start=1
CDS    complement(73426..73641)
/color=4
/locus_tag="C83_00341"
/note="Conjugal transfer protein Maff2 family, protein
motif:Pfam:PF12750.1"
/product="Conjugal transfer protein Maff2 family"
/"ID=C83_00341
/"
/protein_id="gnl|SC|C83_00341"
/codon_start=1
CDS    complement(73709..75109)
/color=4

```

```

/locus_tag="C83_00342"
/note="Type IV secretion system protein TraG VirD4
component [coupling protein], protein
motif:CLUSTERS:PRK13850 protein motif:Cdd:COG3505 protein
motif:TIGRFAMs:TIGR02759 protein motif:Pfam:PF02534.8"
/product="Type IV secretion system protein TraG VirD4
component [coupling protein]"
/"ID=C83_00342
/"
/gene="traG"
/protein_id="gnl|SC|C83_00342"
/codon_start=1
CDS      complement(75288..77189)
/color=10
/locus_tag="C83_00343"
/note="Replication initiation protein RepA [replication],
protein motif:CLUSTERS:PRK11823 protein motif:Cdd:COG0358
protein motif:TIGRFAMs:TIGR02237"
/product="Replication initiation protein RepA
[replication]"
/"ID=C83_00343
/"
/gene="repA"
/protein_id="gnl|SC|C83_00343"
/codon_start=1
CDS      complement(77205..78593)
/color=4
/locus_tag="C83_00344"
/note="MobA/MobL family protein DNA strand transferase
MobA [relaxase], similar to AA sequence:UniProtKB:P07112
protein motif:CLUSTERS:PRK13889 protein
motif:TIGRFAMs:TIGR02768 protein motif:Pfam:PF03389.9"
/product="MobA/MobL family protein DNA strand transferase
MobA [relaxase]"
/"ID=C83_00344
/"
/protein_id="gnl|SC|C83_00344"
/gene="mobA"
/codon_start=1
CDS      complement(78945..79250)
/color=8
/locus_tag="C83_00345"
/note="DUF3847 domain-containing protein AAA family
ATPase, protein motif:Pfam:PF12958.1"

```

/product="DUF3847 domain-containing protein AAA family  
 ATPase"  
 /"ID=C83\_00345  
 /"  
 /protein\_id="gnl|SC|C83\_00345"  
 /codon\_start=1  
 CDS      complement(79372..80205)  
 /color=8  
 /locus\_tag="C83\_00346"  
 /eC\_number=2.1.1.187  
 /note="23S rRNA methyltransferase  
 guanine-N-methyltransferase , similar to AA  
 sequence:UniProtKB:P36999 protein motif:CLUSTERS:PRK11088  
 protein motif:TIGRFAMs:TIGR02072 protein  
 motif:Pfam:PF08241.6"  
 /product="23S rRNA methyltransferase  
 %28guanine%28745%29-N%281%29%29-methyltransferase  
 [methyltransferase]"  
 /"ID=C83\_00346  
 /protein\_id="gnl|SC|C83\_00346""  
 /gene="rlmA"  
 /codon\_start=1  
 CDS      complement(80391..80687)  
 /ID=C83\_00347  
 /color=8  
 /locus\_tag="C83\_00347"  
 /note="Molecular chaperone"  
 /product="Molecular chaperone"  
 /protein\_id="gnl|SC|C83\_00347"  
 /codon\_start=1  
 CDS      complement(80822..81013)  
 /ID=C83\_00348  
 /color=9  
 /locus\_tag="C83\_00348"  
 /note="Transposon-encoded protein TnpW"  
 /product="Transposon-encoded protein TnpW"  
 /gene="tnpW"  
 /protein\_id="gnl|SC|C83\_00348"  
 /codon\_start=1  
 CDS      complement(81092..81943)  
 /ID=C83\_00349  
 /color=9  
 /locus\_tag="C83\_00349"  
 /note="Site-specific recombinase DUF4368

domain-containing protein [recombinase]"  
 /product="Site-specific recombinase DUF4368  
 domain-containing protein [recombinase]"  
 /protein\_id="gnl|SC|C83\_00349"  
 /codon\_start=1  
 CDS      complement(81928..82941)  
 /color=9  
 /locus\_tag="C83\_00350"  
 /note="Serine recombinase [recombinase], protein  
 motif: Pfam:PF07508.7"  
 /product="Serine recombinase [recombinase]"  
 /"ID=C83\_00350  
 /"  
 /protein\_id="gnl|SC|C83\_00350"  
 /codon\_start=1  
 CDS      complement(82988..83296)  
 /ID=C83\_00351  
 /color=4  
 /locus\_tag="C83\_00351"  
 /note="Type IV secretion system protein TraG VirD4  
 component [coupling protein]"  
 /product="Type IV secretion system protein TraG VirD4  
 component [coupling protein]"  
 /protein\_id="gnl|SC|C83\_00351"  
 /gene="traG"  
 /codon\_start=1  
 CDS      complement(83293..83766)  
 /color=1  
 /locus\_tag="C83\_00352"  
 /note="PcfB family protein DUF3801 domain-containing  
 protein, protein motif: Pfam:PF12687.1"  
 /product="PcfB family protein DUF3801 domain-containing  
 protein"  
 /"ID=C83\_00352  
 /"  
 /protein\_id="gnl|SC|C83\_00352"  
 /codon\_start=1  
 CDS      complement(83803..84231)  
 /ID=C83\_00353  
 /color=10  
 /locus\_tag="C83\_00353"  
 /note="Phage replication protein Helix-turn-helix  
 domain-containing protein [replication]"  
 /product="Phage replication protein Helix-turn-helix

domain-containing protein [replication]"  
 /protein\_id="gnl|SC|C83\_00353"  
 /codon\_start=1  
 CDS     complement(84342..85589)  
 /color=9  
 /locus\_tag="C83\_00354"  
 /note="ISL3 family transposase [DDE recombinase], protein  
 motif:Cdd:COG3464 protein motif:PFam:PF01610.11"  
 /product="ISL3 family transposase [DDE recombinase]"  
 /"ID=C83\_00354  
 /"  
 /protein\_id="gnl|SC|C83\_00354"  
 /codon\_start=1  
 CDS     complement(85628..86089)  
 /ID=C83\_00355  
 /color=9  
 /locus\_tag="C83\_00355"  
 /note="Conjugative transposon protein helix-turn-helix  
 domain-containing protein"  
 /product="Conjugative transposon protein helix-turn-helix  
 domain-containing protein"  
 /protein\_id="gnl|SC|C83\_00355"  
 /codon\_start=1  
 CDS     complement(86218..86436)  
 /ID=C83\_00356  
 /color=7  
 /locus\_tag="C83\_00356"  
 /note="Helix-turn-helix domain-containing protein  
 [transcriptional regulator]"  
 /product="Helix-turn-helix domain-containing protein  
 [transcriptional regulator]"  
 /protein\_id="gnl|SC|C83\_00356"  
 /codon\_start=1  
 CDS     complement(86536..87927)  
 /color=8  
 /locus\_tag="C83\_00357"  
 /note="Group II intron-encoded protein LtrA [reverse  
 transcriptase], similar to AA sequence:UniProtKB:POA3U1  
 protein motif:Cdd:COG3344 protein motif:PFam:PF00078.21"  
 /product="Group II intron-encoded protein LtrA [reverse  
 transcriptase]"  
 /"ID=C83\_00357  
 /"  
 /protein\_id="gnl|SC|C83\_00357"



/gene="ltrA"  
 /codon\_start=1  
 ncRNA complement(87975..88046)  
 /ID=C83\_00358  
 /color=1  
 /locus\_tag="C83\_00358"  
 /product="group-II-D1D4-1"  
 ncRNA complement(88086..88279)  
 /ID=C83\_00359  
 /color=1  
 /locus\_tag="C83\_00359"  
 /product="group-II-D1D4-3"  
 CDS complement(88556..88876)  
 /color=7  
 /locus\_tag="C83\_00360"  
 /note="Transcriptional regulator containing a XRE family  
 HTH domain [transcriptional regulator], protein  
 motif: Pfam:PF12844.1"  
 /product="Transcriptional regulator containing a XRE  
 family HTH domain [transcriptional regulator]"  
 /ID=C83\_00360  
 /"  
 /protein\_id="gnl|SC|C83\_00360"  
 /codon\_start=1  
 CDS 89041..89514  
 /ID=C83\_00361  
 /color=1  
 /locus\_tag="C83\_00361"  
 /note="DUF1273 domain-containing protein"  
 /product="DUF1273 domain-containing protein"  
 /protein\_id="gnl|SC|C83\_00361"  
 /codon\_start=1  
 CDS 89547..90068  
 /ID=C83\_00362  
 /color=1  
 /locus\_tag="C83\_00362"  
 /note="DUF4367 domain-containing protein"  
 /product="DUF4367 domain-containing protein"  
 /protein\_id="gnl|SC|C83\_00362"  
 /codon\_start=1  
 CDS complement(90136..90483)  
 /color=7  
 /locus\_tag="C83\_00363"  
 /note="helix-turn-helix transcriptional regulator

containing a HxIR family HTH domain [transcriptional regulator], similar to AA sequence:UniProtKB:P37486  
 protein motif:Pfam:PF01638.11"  
 /product="helix-turn-helix transcriptional regulator  
 containing a HxIR family HTH domain [transcriptional  
 regulator]"  
 /"ID=C83\_00363  
 /"  
 /protein\_id="gnl|SC|C83\_00363"  
 /codon\_start=1  
 CDS 90625..91020  
 /color=8  
 /locus\_tag="C83\_00364"  
 /note="Pyridoxamine 5'-phosphate oxidase family protein  
 [oxidase], protein motif:Cdd:COG5015 protein  
 motif:TIGRFAMs:TIGR03618 protein motif:Pfam:PF01243.14"  
 /product="Pyridoxamine 5'-phosphate oxidase family protein  
 [oxidase]"  
 /"ID=C83\_00364  
 /"  
 /protein\_id="gnl|SC|C83\_00364"  
 /codon\_start=1  
 ncRNA 91035..91149  
 /ID=C83\_00365  
 /color=1  
 /locus\_tag="C83\_00365"  
 /product="FMN"  
 CDS 91227..91826  
 /color=8  
 /locus\_tag="C83\_00366"  
 /note="Riboflavin ECF transporter S component RibU  
 [transporter], similar to AA sequence:UniProtKB:E5QVT2  
 protein motif:Cdd:COG4720 protein motif:Pfam:PF12822.1"  
 /product="Riboflavin ECF transporter S component RibU  
 [transporter]"  
 /"ID=C83\_00366  
 /"  
 /protein\_id="gnl|SC|C83\_00366"  
 /gene="ribU"  
 /codon\_start=1  
 CDS 91842..92465  
 /color=8  
 /locus\_tag="C83\_00367"  
 /note="4Fe-4S dicluster domain-containing protein

[electron transfer], similar to AA  
sequence:UniProtKB:P00195 protein motif:CLUSTERS:PRK07118  
protein motif:Cdd:COG5015 protein motif:TIGRFAMs:TIGR04105  
protein motif:Pfam:PF00037.21"  
/product="4Fe-4S dicluster domain-containing protein  
[electron transfer]"  
/"ID=C83\_00367  
/"  
/protein\_id="gnl|SC|C83\_00367"  
/codon\_start=1  
CDS 92470..93249  
/color=8  
/locus\_tag="C83\_00368"  
/eC\_number=3.5.1.-  
/note="O-acetyl-ADP-ribose deacetylase, similar to AA  
sequence:UniProtKB:P0A8D6 protein motif:CLUSTERS:PRK04143  
protein motif:Pfam:PF01661.15"  
/product="O-acetyl-ADP-ribose deacetylase [hydrolase]"  
/"ID=C83\_00368  
/protein\_id="gnl|SC|C83\_00368""  
/gene="ymdB"  
/codon\_start=1  
CDS 93194..94069  
/ID=C83\_00369  
/color=8  
/locus\_tag="C83\_00369"  
/note="Silent information regulator family NAD-dependent  
deacetylase Sir2 [deacetylase]"  
/product="Silent information regulator family  
NAD-dependent deacetylase Sir2 [deacetylase]"  
/protein\_id="gnl|SC|C83\_00369"  
/gene="sir2"  
/codon\_start=1  
CDS complement(94141..95541)  
/color=4  
/locus\_tag="C83\_00370"  
/note="Relaxase/Mobilisation nuclease domain [relaxase],  
protein motif:Pfam:PF03432.8"  
/product="Relaxase/Mobilisation nuclease domain  
[relaxase]"  
/"ID=C83\_00370  
/"  
/protein\_id="gnl|SC|C83\_00370"  
/codon\_start=1

CDS complement(95596..95862)  
/ID=C83\_00371  
/color=1  
/locus\_tag="C83\_00371"  
/note="protein BART-1"  
/product="protein BART-1"  
/protein\_id="gnl|SC|C83\_00371"  
/codon\_start=1

CDS complement(95877..96161)  
/ID=C83\_00372  
/color=1  
/locus\_tag="C83\_00372"  
/note="hypothetical protein"  
/product="hypothetical protein"  
/protein\_id="gnl|SC|C83\_00372"  
/codon\_start=1

CDS complement(96383..97816)  
/color=9  
/locus\_tag="C83\_00373"  
/note="IS5 family transposase [DDE recombinase], protein motif: Pfam:PF05598.5"  
/product="IS5 family transposase [DDE recombinase]"  
/"ID=C83\_00373  
/"  
/protein\_id="gnl|SC|C83\_00373"  
/codon\_start=1

CDS complement(97940..99400)  
/color=8  
/locus\_tag="C83\_00374"  
/note="Lsa family ABC-F type ribosomal protection protein [transporter], similar to AA sequence: UniProtKB:P45127 protein motif: CLUSTERS:PRK11819 protein motif: Cdd:COG4586 protein motif: TIGRFAMs:TIGR03719 protein motif: Pfam:PF00005.21"  
/product="Lsa family ABC-F type ribosomal protection protein [transporter]"  
/"ID=C83\_00374  
/"  
/protein\_id="gnl|SC|C83\_00374"  
/codon\_start=1

CDS complement(100062..100394)  
/ID=C83\_00375  
/color=4  
/locus\_tag="C83\_00375"

```

/note="plasmid mobilization relaxosome protein MobC
[relaxosome]"
/product="plasmid mobilization relaxosome protein MobC
[relaxosome]"
/gene="mobC"
/protein_id="gnl|SC|C83_00375"
/codon_start=1
CDS    complement(100394..108523)
/color=10
/locus_tag="C83_00376"
/note="DEAD/DEAH box helicase family protein Superfamily
II DNA/RNA helicase SNF2 family [helicase], protein
motif:Cdd:COG4646 protein motif:PFam:PF00176.17"
/product="DEAD/DEAH box helicase family protein
Superfamily II DNA/RNA helicase SNF2 family [helicase]"
/"ID=C83_00376
/"
/protein_id="gnl|SC|C83_00376"
/codon_start=1
CDS    complement(108540..108749)
/ID=C83_00377
/color=4
/locus_tag="C83_00377"
/note="Putative tranposon-transfer assisting protein
%28TTRAP%29"
/product="Putative tranposon-transfer assisting protein
%28TTRAP%29"
/protein_id="gnl|SC|C83_00377"
/codon_start=1
CDS    complement(108746..109339)
/ID=C83_00378
/color=1
/locus_tag="C83_00378"
/note="DUF4316 domain-containing protein"
/product="DUF4316 domain-containing protein"
/protein_id="gnl|SC|C83_00378"
/codon_start=1
CDS    complement(109351..109962)
/ID=C83_00379
/color=1
/locus_tag="C83_00379"
/note="DUF3848 DUF4316 domain-containing protein"
/product="DUF3848 DUF4316 domain-containing protein"
/protein_id="gnl|SC|C83_00379"

```

/codon\_start=1  
 CDS complement(109959..112034)  
 /color=10  
 /locus\_tag="C83\_00380"  
 /eC\_number=5.99.1.2  
 /note="DNA topoisomerase III, similar to AA  
 sequence:UniProtKB:P14294 protein motif:CLUSTERS:PRK07726  
 protein motif:Cdd:COG0550 protein motif:TIGRFAMs:TIGR01056  
 protein motif:Pfam:PF01131.14"  
 /product="DNA topoisomerase III [topoisomerase]"  
 /"ID=C83\_00380  
 /protein\_id="gnl|SC|C83\_00380""  
 /gene="topB"  
 /codon\_start=1  
 CDS complement(112103..113113)  
 /ID=C83\_00381  
 /color=1  
 /locus\_tag="C83\_00381"  
 /note="DUF4238 domain-containing protein"  
 /product="DUF4238 domain-containing protein"  
 /protein\_id="gnl|SC|C83\_00381"  
 /codon\_start=1  
 CDS complement(113242..114324)  
 /color=1  
 /locus\_tag="C83\_00382"  
 /note="DUF4366 domain-containing protein, protein  
 motif:TIGRFAMs:TIGR04211 protein motif:Pfam:PF08239.5"  
 /product="DUF4366 domain-containing protein"  
 /"ID=C83\_00382  
 /"  
 /protein\_id="gnl|SC|C83\_00382"  
 /codon\_start=1  
 CDS complement(114314..114571)  
 /ID=C83\_00383  
 /color=1  
 /locus\_tag="C83\_00383"  
 /note="DUF4315 domain-containing protein"  
 /product="DUF4315 domain-containing protein"  
 /protein\_id="gnl|SC|C83\_00383"  
 /codon\_start=1  
 CDS complement(114585..116339)  
 /color=4  
 /locus\_tag="C83\_00384"  
 /eC\_number=3.4.-.-

```

/note="NlpC/P60 family pepidase, similar to AA
sequence:UniProtKB:P21171 protein motif:CLUSTERS:PRK13914
protein motif:Pfam:PF00877.13"
/product="NlpC/P60 family pepidase [pepidase]"
/"ID=C83_00384
/"
/protein_id="gnl|SC|C83_00384"
/codon_start=1
CDS    complement(116343..118730)
/color=4
/locus_tag="C83_00385"
/note="Type IV secretion system protein TraC VirB4
components [ATPase mating pair formation], protein
motif:Cdd:COG3451 protein motif:TIGRFAMs:TIGR02746 protein
motif:Pfam:PF12846.1"
/product="Type IV secretion system protein TraC VirB4
components [ATPase mating pair formation]"
/"ID=C83_00385
/"
/gene="traC"
/protein_id="gnl|SC|C83_00385"
/codon_start=1
CDS    complement(118690..119124)
/color=4
/locus_tag="C83_00386"
/note="PrgI family protein Type IV secretion system,
protein motif:Pfam:PF12666.1"
/product="PrgI family protein Type IV secretion system"
/"ID=C83_00386
/"
/protein_id="gnl|SC|C83_00386"
/codon_start=1
CDS    complement(119141..120007)
/ID=C83_00387
/color=4
/locus_tag="C83_00387"
/note="Membrane protein trbL/VirB6 plasmid conjugal
transfer family protein"
/product="Membrane protein trbL/VirB6 plasmid conjugal
transfer family protein"
/protein_id="gnl|SC|C83_00387"
/codon_start=1
CDS    complement(120033..120248)
/color=4

```

```

/locus_tag="C83_00388"
/note="Conugal transfer protein Maff2 family, protein
motif: Pfam:PF12750.1"
/product="Conugal transfer protein Maff2 family"
/"ID=C83_00388
/"
/protein_id="gnl|SC|C83_00388"
/codon_start=1
CDS    complement(120392..120703)
/ID=C83_00389
/color=7
/locus_tag="C83_00389"
/note="helix-turn-helix domain-containing protein
[transcriptional regulator]"
/product="helix-turn-helix domain-containing protein
[transcriptional regulator]"
/protein_id="gnl|SC|C83_00389"
/codon_start=1
CDS    121129..122430
/color=9
/locus_tag="C83_00390"
/note="Transposase IS116/IS110/IS902 family [DDE
recombinase], protein motif: Pfam:PF02371.10"
/product="Transposase IS116/IS110/IS902 family [DDE
recombinase]"
/"ID=C83_00390
/"
/protein_id="gnl|SC|C83_00390"
/codon_start=1
CDS    complement(122539..124290)
/color=4
/locus_tag="C83_00391"
/note="Type IV secretion system protein TraG VirD4
component [coupling protein], protein
motif: CLUSTERS:PRK13876 protein motif: Cdd:COG3505 protein
motif: TIGRFAMs:TIGR02759 protein motif: Pfam:PF02534.8"
/product="Type IV secretion system protein TraG VirD4
component [coupling protein]"
/"ID=C83_00391
/"
/gene="traG"
/protein_id="gnl|SC|C83_00391"
/codon_start=1
CDS    complement(124290..124775)

```



/color=1  
 /locus\_tag="C83\_00392"  
 /note="PcfB family protein DUF3801 domain-containing protein, protein motif: Pfam:PF12687.1"  
 /product="PcfB family protein DUF3801 domain-containing protein"  
 /"ID=C83\_00392  
 /"  
 /protein\_id="gnl|SC|C83\_00392"  
 /codon\_start=1  
 CDS complement(124810..125121)  
 /ID=C83\_00393  
 /color=1  
 /locus\_tag="C83\_00393"  
 /note="hypothetical protein"  
 /product="hypothetical protein"  
 /protein\_id="gnl|SC|C83\_00393"  
 /codon\_start=1  
 CDS complement(125131..125772)  
 /color=1  
 /locus\_tag="C83\_00394"  
 /note="DUF3846 domain-containing protein, protein motif: Pfam:PF12957.1"  
 /product="DUF3846 domain-containing protein"  
 /"ID=C83\_00394  
 /"  
 /protein\_id="gnl|SC|C83\_00394"  
 /codon\_start=1  
 CDS complement(125827..126342)  
 /ID=C83\_00395  
 /color=1  
 /locus\_tag="C83\_00395"  
 /note="hypothetical protein"  
 /product="hypothetical protein"  
 /protein\_id="gnl|SC|C83\_00395"  
 /codon\_start=1  
 CDS complement(126354..127280)  
 /color=10  
 /locus\_tag="C83\_00396"  
 /note="ParB/RepB/Spo0J family partition protein ParB-like nuclease domain [partitioning system], similar to AA sequence: UniProtKB:Q83AH2 protein motif: CLUSTERS:PRK13832 protein motif: TIGRFAMs:TIGR00180 protein motif: Pfam:PF02195.12"

```

/product="ParB/RepB/Spo0J family partition protein
ParB-like nuclease domain [partitioning system]"
/"ID=C83_00396
/"
/protein_id="gnl|SC|C83_00396"
/gene="parB"
/codon_start=1
CDS    complement(127237..128064)
/color=10
/locus_tag="C83_00397"
/note="plasmid-partitioning protein A [partitioning
system], similar to AA sequence:UniProtKB:P37522 protein
motif:CLUSTERS:PRK13869 protein motif:Cdd:COG2894 protein
motif:TIGRFAMs:TIGR03453 protein motif:Pfam:PF01656.17"
/product="plasmid-partitioning protein A [partitioning
system]"
/"ID=C83_00397
/"
/protein_id="gnl|SC|C83_00397"
/gene="parA"
/codon_start=1
CDS    complement(128106..129008)
/color=10
/locus_tag="C83_00398"
/note="Replication initiation protein RepA [replication],
protein motif:Pfam:PF06970.5"
/product="Replication initiation protein RepA
[replication]"
/"ID=C83_00398
/"
/gene="repA"
/protein_id="gnl|SC|C83_00398"
/codon_start=1

```

BASE COUNT 30470 a 32944 c 29545 g 36049 t

ORIGIN

```

1 gtgatttccg atcccttct g gatcccgcc accggagaga tcattgtctc gatcgtaaac
61 ccggtttttt ctgaatcagg cagcgagatt gccggctga ccggtttaga tgtctattha
121 agcagtctgg gccaggtaat ctcacgatc aaagtcgggg aacacgggta tcttgaactt
181 atccaata attcggatta catatacagc gacgatccga gcgcatcggg caggaatgtt
241 tccgaactcg atatcccca ggagtataaa gataagggtc aaagcaatta taatggcggtt
301 ctcaactca gttatagcgg catccggtat acctccatgt tcagaaacag cgcaaccacc
361 ggctggctgg ctgtcgccac gctcccgatt tctgaggtaa atgacgacacg caaccggctg
421 ctaccatac tgggcgtgct gtcctcata attctggccg gacttacaac tgttatcgtg
481 ttattgtac accgtaccat gaaacctct gccggatca gcagaagcat ggaagatttc

```

541 tcacaggta atctggcgt cgacattcct ctccggcga cagatgatga aatcggcaga  
601 atggccggca gcatccgttc gtctgttgc gctctcaagg atatgattca taatgtcaca  
661 cgcgtcctgg aagaaatttc cgggggcaat ctgaaactgt ccgtagacgg taattattha  
721 ggagattttt cttttatagg ggatgccctg gagcagatta taaaatcct gaattatac  
781 ctttccaaa tcagctcctc cgcccagcag gtagcctatg gctccgaaca gggggcctgc  
841 ggcgcgagc cgatggctca gggcgctacg gaacaggcgg cggcggcaga ggaactggcg  
901 gcggtcatag aggacatctc ccagcagatt atatccaatg tcagcagcac ttcaaaagcc  
961 aatatgagcg taactacggt ggtaaatgaa gccgagataa gcaaccgcc catgcaggag  
1021 atgctgtcgg ctatgcagga catccgacag agtccaacg agataagtaa aattatcagc  
1081 gcaattgaag atatttcctt ccagacaaa atattgtccc tcaatgcagc cgtcagggt  
1141 gcccgcccg gtgaaaacgg cagaggttc gccgtcattg ccgcagaaat caggaatctg  
1201 gccgcaaaga gcgccgaagc gtcccataac acgacgtccc tcatcgccgc ttcgttaaaa  
1261 gcagtgaac acggaacgcg tatttctggt gaaacggctg tctctctca gaatgtcctg  
1321 gacggtatta aagaggtgga gatgattatt gagcagatat cttcagctc cgacgatcag  
1381 gcccgctccg tggaaacaggt acatcagagt atcacgcaga tttccgatgt tgccagctc  
1441 aactcagcta ccgccgaaga gagcgccggc gccagcgaag aactgtccgc acaggcgtg  
1501 ctgttgaagg aattgattgg ctcttccgg ctcaggaacg aaccctgata aatagtaaa  
1561 taatctttt tactttacag ccattgattg cttattcctc agtcagatag ctattacata  
1621 tttaccgcc tgcggcgggt cgctgtggcg acattattc ataccgccg aggcattagc  
1681 tcaacttagca agtgtaacga gcttagtgaa caagccctt ttagagttgt ggtcctcca  
1741 ggagcgggtt taatttaaca ggagaacttt cctgttaaat taaaaaccg aaaacctctc  
1801 acatcaaggt tttcggcatt gtattcagtg ttctgagcg gattcgaacc gctggcctc  
1861 cgcttaggag aaccattgaa cattgtcat ctgtgtcac ctatgtacag gaaagtcgt  
1921 atccgtcagg ctttttctt attccgagtc gctccgtgtt cgtccaagt caccgatgc  
1981 gtagatgtt caccggttca ttttagcag ttttggatt tttctaaaaa ggggaacaag  
2041 aacatcttt atctaccgcc aattttagca cttttcag taaaaatcca tctgcagtcg  
2101 aaccgcaagc ctgaacagaa tatctcat ctccctgaaa agtactcgt ggggaagatg  
2161 ataaaaaaga gagtattgca ttctcgggtc aatgagatc cgagtttaca atacttcta  
2221 tgtaagtgc gggccggtaa tccggccctt attttagttc aggctcttcg ccaggcttgt  
2281 cagcagcgt gccatttccg gattactgag tatctttgcc agaaggcag gatccacacc  
2341 tgaaggggct gcttttctt cggatccggt ttcagccggt gactcaatac tgctgaacc  
2401 tttccgctg taaaaggctt tctcaacaa tgctgcgtt ttttaccgt catcatcaag  
2461 aatgtgggaa tattgatccg taaccatctg tgctgtgca tggccggaat cgcctgaac  
2521 cgatttgata tcgccgccg tcagcttcag cttataagt atgctggaat gacgaagact  
2581 gtgaaagacg accttggca gatcattctt ctcaatcag tctgcaaaga gggccgtgat  
2641 gcgggattgc tctgtcggca tgccaagcc attgccatg accagatcga aatctgcgta  
2701 ttcattgcca agggcttctt tcgtgaaatc ctgctcccgt ttccactta ccagcatctc  
2761 agcgacggtc ttcggaagaa agatcttgcg ggtactggtt gccgtctttg gttcttcaa  
2821 tacaaggacg gttttattgc tttcccgag ttccggaag acgcaagca cgtccttctt  
2881 tccaaaacc ttcataacac tctatcgac acgctgcagc tccttattca cataaacata  
2941 ggctttccg gcggcgatgc tttccggaga gatgtctac caatcccagg tcaggccaag  
3001 cagttcgcca attcgaagag aacaggcaaa tgccaggtg atggccagtt tcaggcgtc  
3061 atctcatc acctcaggg catgaaacag agtaggagc tcccagatct cgcgttctt  
3121 tgctcagat tttggaaccg tggcatacat agcagggtt tttccataa gttcccatt

3181 cacagcctga tgaaggcg tgcgcagaat gttatgtatc tttcttacgg tcggcggagc  
3241 cacataaatc acatthtttag agtttgcttt ctgagtgatt cgggtgcacgg aaggagtctt  
3301 cagaagctgc atataatact tctccagaac ccgtgctgtc acgtcactga gcttcatact  
3361 gccgatgatc ggagatatgt aatgctcgat cagagccgta ttgcttccgt agacggacat  
3421 ggaccatgtg gtcttgccat agagagcaac atactctttc agcagctcat ccaccgtctt  
3481 gactgatgg atcaccatag tgcctatttc ctgccgatat tcaatctcag ctttccggcg  
3541 ctttgcatcg gccatggct tgaagctttc ccatttctgc tttcgcttgc cggttgcttc  
3601 atcgatcatg aggtaaacga cattgtaacg gttatttctc tgtacaatgg atgccattgt  
3661 ctctcactcc tttcctagt ctgcgcttc agtttctgct gaaacaggaa ccactgata  
3721 tcatcacggg ggatcagata ctgagtcg tattttttgg cttaatttc gccggctga  
3781 atcagcctgc gcacctcatt gtatgtaagg tcaagaagta tcgccgcctc ctgcagggta  
3841 aatgctgcct ttgttctgc cacctgaga cgaggcttca ctgcttctg ctgcattctc  
3901 tcaatcgcca tgatttctc cggtgatctg tcgcaaagtt tgcgatattt gctctgaccg  
3961 gcataccagc gctcaaagct gtcctttgtt acgcgccgtc ggtctgcaat atagacaaac  
4021 tcaaactgat ctttgtctct gccggttaat aggatattgt agacttctt ccgggtgatc  
4081 aaaagcagtc ttgccatttc cggcatcgtc atggatgccg cttccagctc tgcattctgt  
4141 tcccggctcg ctgggttcg atacttggtc tgcgttctgt accatgcctc aaaaacatcc  
4201 ttccggatac gcatccagg atccacctca aaggctcaa tgtgatccg ctgatcaag  
4261 gtataaacg tgcattcaga tacaccagc agcgccgcca tctcctgaac cgagtaagaa  
4321 tatgccctga gctctgcacc gggcggcgat ccatccacct tctgtactt gatctgatt  
4381 gcataccagt gctcaaagct gtcgatcaca actcgcact tgcctgcgac aatgatcgtt  
4441 tcaaagcact gcctatgtac cagccaataa gaatccgttt ttcaagccc caacatccg  
4501 cgcattctcg gaacggacat ttagtcttt tcttttcat ccatatcggg tctccttat  
4561 aaagtgatag ccaggctta agacctggct acatcgtagc ggttatccgt tcgaattgtt  
4621 aggatgtcgc ggaacggctc gacatcctg acaacttaca gcttgttgc caaccactca  
4681 tcgaagctct tctttgaaat tcgataggcg gatccgatct taaaccagcg aaattcctgc  
4741 tgttccaaca gcttatatac cgtgccgcg ctgatgccga ggatgatctg cagatcctca  
4801 acggtatagc agcgttctc tgtgatggg attgcatttt ctgacggtaa ctcaaaagc  
4861 tcaattgctt ccatatgtca ttctcgtt tccgtttca tctttgccg aaattcaaa  
4921 tcagggaaac tccacgatt ccggaatggg caaggatcg tccggatcca gatgaaggct  
4981 tacgcggatg ctgtcgtcaa tgcgttccat gtgctttgg ctcatgcgcc ccagatactt  
5041 gattacctga cacttgtga tggtagcat ctgttctgcc tcaatcatgg aggttctt  
5101 cagaccgctg tcttttca gaacgcagtg ttaggctgc cccagcttct tcaattccgt  
5161 ggtaagcggc acgacgatca atgtcggacc gaagaaattg ccgctgttgt tctgaatatt  
5221 gatgaccggt cgaacccgc cctgaatatt tccgcgatgc tcgccaggt ctgccagata  
5281 gatatccg cgtctatagt tcaatcttt tcaagcatt tttctctcc tcatataggt  
5341 tctatgtaaa agggcgggat atcgttccc acccaagaaa gccgctaagg gcttaatctc  
5401 aataatgt tatccccaca tttgtctcg acaccctgg gaactggcag gcgctctgac  
5461 ctgccgggaa tacattcagg cgtctggctg ctaccagatc catgggaatc taaccctcc  
5521 gtggttctca ccgagctcgc tacagaagta tcaattgtct gtgatggatc aatgctgtat  
5581 atcgggaagca atccgatact tacaggccg ttacagctcc cgccttctaa tggcagctg  
5641 tgcgttcatc cgctgatgtg gctccccatc acagggttgt gcctgaagaa tggatgtaa  
5701 tttcaaggt tctgtagag gagtcgttg gctccttaa gtgacgtttt tcaatcttt  
5761 gatactttt ttaccggct tgcaaacg ccgattccaa aatgcccgcc taccgcttt

5821 ggatgaaaag cggcacttct ggacgcgcgg tagatttca tcattcgtcc atagacgatg  
5881 acgaaaatca caacaccgag tgccttgatg gtaaactgaa cgaccatgca ctgcaggaac  
5941 agtgcaaca gaggcccgat ttccatggcc tccagcgtat cctgcatggt ttctaaggct  
6001 gcagcatcca ccgccgtatt cccggcaatg agcccgcctg cgttattgat cacatgctgc  
6061 gtcacatcaa agactgcat cacaatattg aagggttgg tgatgagtgt cacggctaca  
6121 aaggctctaa agaccattt gaagaagatc caggtttcaa aattggcaag gttattgtgg  
6181 tcaatgatca tctgaatcag ctcatagcag gcaatgaagg tcaagatcaa gctgcaacc  
6241 gggataatca ctgattcggg aacattccgg atcatgacga agacgcccgg cgagaaattc  
6301 gccggagtgc tccccactg cgtcgaata tcgccaacct gagggtttac cgaatcaaac  
6361 agtcccgtca gctggttcat gatgccgga acaagcagtt ccttcagcca ttcaccaatc  
6421 tgatcgagta cgtgttcaa cgattaacac tcctttcta gccgaagagg ccggaagca  
6481 ggggaaccag agtgatacc atgagggcca cgccgccacc tgccatcagc tgctcatac  
6541 cctgagactt tgcttatgtg tgataagaa gcaatagaag tgcaaaaaat tttgccgttc  
6601 ctatccgaca cttggccatt gtgtcggata ggtcgggagg ttattcgggc aagtcaatc  
6661 tgccgacaaa gctgtaata atctcaatgt cctgcctgag ggtgccgttc tcatcatagc  
6721 tgactcatg caccacaatt ttctgatca tttccgcaa gagagtgggg gtcagttct  
6781 caaaggcaag gtgcttcagg acaatgcca taaatttct ggcttgacg gtagctgct  
6841 gtgactgtc cagttcggct tgcaaggcgg cggctctct tttcagctcc gctgctcgg  
6901 cttcgtagc agccgacagt tccatgaac gctcatcgt gattttgcc ttacattgt  
6961 cctcatagc ccgcttgata atgcggctga tttcagaaat gcgttctgc gcctgttcaa  
7021 gctgctgat ggctgcggcg gtcttctgct tgcccgcat ctgcttctgc tggacaagta  
7081 gtttcaaaa ccggctctca tgcttgctg cgtattcggc cacttgccgg agatttgcca  
7141 ggacaccagc ggtcaacaga tcggtgcgga taaagtgcgc cgtacagttg cgggtgcgt  
7201 tctttagct gccgcagatg tagcagctct gttgctgct tttgttctga taccgctgct  
7261 gatacagcac atggccgag tcggcgaga acaaaatccc ggagaacagc ccaactcat  
7321 ctagcgggt cgggctttg cgtgtttg gtaactcct caccgttcc catgtttct  
7381 tgtcagatg cggctcatgg tggttctga aaatggctg ctctcagc gggttctcta  
7441 tgctgtgct gacattata gaaggcttt ccgtttgaa gttcaccaga catccggtg  
7501 actctcgtt ttcaggata tgaacgacgg tgttgctgc ccattgcac tcatagcctg  
7561 ggtgataacg gcgggtgct cctgtccgct gatattccag cgtccccggc tggggattt  
7621 gctgctcgt cagcatcgg gcaatcttg tcgggcccgt cccggcaagg caaagctggt  
7681 aaatctgct caccaccgg gcggcttct cgtctataat aaaattctg tctcgtcca  
7741 tcacatagc gtaaaccggc ttgctgtaa caggcttgc gctcatgcct tttactttt  
7801 tcaactgctt gattttctg ctgatatc tcaccagcca ttcattgaac agatttcga  
7861 gcgggtaaa atcgtgtcc atgccctgc tggcactgt cacattatc ttgacagca  
7921 taaaacgac accctttga gggaacagca tttccgtga aaacctacc tgcaagtagt  
7981 ttcgccctaa ccggctcatg tccttgacga tgaccgtacc cactttccg gttcaatg  
8041 ccgaagcat ggctgaaat ccggccgct ggaagttgc gccgaaaaa ccgtcgtcgg  
8101 tgtaccagc cagattgga aagcgttct gtttgcgta gtttcgagt atccttttt  
8161 gttcagat ggaattact tcgcttga atcatcctc gtgggacaat ctcgataaa  
8221 gggcgtaat gaggttttg gtgctgtc ttaacataaa atcctcgtt tccgacagc  
8281 agccccacta ttcgtggtt ctattgtacc acggaacggc gggggctgta cagcgcaaa  
8341 agcgttaa attgcttct acagctttc aattttccga ttttatggt atgggtgtc  
8401 gtccatatt tgcatgaa aagttcataa ctccgtgta tactctgatt taacaaaaa

8461 atcagaagtt aaaggagaaa acatgaagta tacaatagat gaattaaccg cggccaaaag  
8521 gcaaattgat tcaactctgc acaagctaag agaaacagta aaaacattg aatcaaagga  
8581 taattccgag cggtataaat cacaaatcac attggcaaag agaagaataa aagcctttga  
8641 aattgcaaat tattttatag agaatgagat taagaattgc taaagcactt ccgattttcg  
8701 ttccagcggg catgctccct ggcatggccg cttttccatg ccccggttca cgccggataa  
8761 gtcggctcct gtgtagcagc ggcttccgct tccagtaccg ggcctttt gtcggcggct  
8821 gtggttgtgg tgtctttctt gaaatagccg gacacgacaa ggacggaatt gcccatgcgg  
8881 atttccgtca cacagtcagg gcggcgggtg gtgcgggtgt cgtgctgctt gttatctgac  
8941 ataggcaata ctctttcag tcggtaatca gtttctcat gctctccatt ttccgcttgg  
9001 cggtttcctg ccggaagtg tcgccgtaa agcgtaccgg gacgcacatg gaaagcaggc  
9061 ggtcataaat ccgggaatgg gcggtgtcct ccgggttgag caggtcgtcc agcgtaaagt  
9121 tggctgtgac gatcagcggc ttgccgtgc ggtaacggct gtcaatcaca ttgaacacct  
9181 gttccagccc gatttccgct ccgcttcca tgccgaagtc gtcaaggatc agcagcggat  
9241 aacgacaaag gcgggaaatg tactcgttgc gccctcaaa gctggcggca aggtcattga  
9301 ggataagagc aaagttcgtc atgcggacgg ggatttctt ctccatgagg gcgtttgca  
9361 tacagcctgc aaggtagctt ttgccgtgc ctacgccgcc ccagaacagg cagccgatat  
9421 tgtctgtccg catatctcc caatgtcca cataccggcg ggcaagccc gtctgcgggt  
9481 tcctgccgtt gctgttctg aaagtccagt cccgatggt ggggtcggta aagccccggc  
9541 gtttcagttc ttccaggtg tcaaggtgc tgcgccgtt ttccggcgtt tcccgttct  
9601 gcggggcggg tctctggcag tcgactctg ccgggtggcg gtcgcgccc aagatagcgg  
9661 cttatccgg cgcaaaatag gtttcttgc gttgcccga cttgccgag tacagtaaac  
9721 cgtcctgcc ggtgtagtcc tccggctcc ggatggtggt cgtcatatt tccaaaacc  
9781 cgttgatttc atttctcata aactctgcc ctcttgcag gatgagctg gtatgccctt  
9841 tttaggggct tccttttctg cgttccccgc ccatatccg agggcggcgg catagtctg  
9901 gtagctttc ccgtggcgg caaggtagc gctcatttc tcgatgaacc gttccagct  
9961 gtcagggtac tctgctgca actcgtcgt ttcggctgt gacagaaaaa tatttcata  
10021 tcggccatag ggcgcggacg gccccact cactccctt gttggctct ctgtaagggt  
10081 gtttatagta gtttggttag gggacggtt tccaccatc ataaggctcg ttttctgacc  
10141 atcagtagga cggtttccg gctctatgag gggcggactt ccggccatca gttggtctga  
10201 aaactgtacc tgtggcactg gcggtactt gacataaagc cggttcggg cggagaagcc  
10261 gccccgtcc cgtccaaca gcccgcctg gtccagtca ttaagcggc cttgatggt  
10321 ggtgctgctt ttatccagta tttctgctat ctccgcatg ggatagataa tataaatct  
10381 gccctcgtc tccagccact tgttttctg ggagagggtg gaacggtcta acagcagca  
10441 atacagcagc ttggcggct gtgaaatct cattttcagc aggaaacggg gatacggcag  
10501 ataggcggg agccgctgt ctgccctgat ataacagc ataggatcac ctccctgtg  
10561 tcgggtgat tttggcgtat tgcacgcat taaaacgccc tttccggggg aaaaggataa  
10621 atgtatcgcg tacccttga caccacgaa aaaagcctg atttatgcgg gtttgaag  
10681 ctctaaagc tgacatctt gcctttgtt cgttttctc tcggcggctt tgattttct  
10741 catgcgccc gcgagtcgg gcagattt tccccggtg gatttgggga caaaggccc  
10801 cccgagacg gcacaccgt tccggctcc ccggcacaag agggctcgg ccagctccc  
10861 gtcaagggg aggacagca cacggaacca gtggacatg agggaaaagg aaatgctct  
10921 gacgcacag caaggctccc cgtcgtcca tagcaggcag ttccctcat cgtagtaca  
10981 gactcatgt accagccc gcgcccgg gtgctggcg tagtccatgt gggcaggtt  
11041 atcgtcatg gctctgctc tttctgctg gcggctcgtc ccggcgaata atctggtcga

11101 tgttccgctt gacggtctgc aactccttga accgctgttt ctgttcgtga taggtgttat  
11161 acaggccgtc tttctcggag ataagctgct cgatctcggc ctgcaacgct ttccgggagg  
11221 gcagcttggg aatgcatgac gccttgaat accgggctgc tgcgtcggct atgataaaat  
11281 cgctctcatg ggcttgcggg tatgcggcgc gggctttctc ggatttctgt gcccgagcc  
11341 cgtcgcgggc ggcttggtc tgggctagg ccaacacctg ccgctgcaac ttcttttcc  
11401 cttgcagctt cgtttccagt gctttcagtt cgcgctggg ctggcgatt ttctgatagg  
11461 cgggtgcaac ggaggcttct aactgctccg gggaagtaa gccgtattgc tggtagacgg  
11521 acagcgtttt ggaggctgc ttcagattgt gtatcttcgc ccagcgttca tagccccggc  
11581 ctttgcctc ggccatttc tgctaatgt ccacaagccg ctgactccg tctgttttcg  
11641 gggcggctat ctggctctg gcaacctgca agcggctttt tatgggtcgt gggggatcgg  
11701 gggatctggc tggcgtctc gctgctctgg cggcgtttg ctctaaaacg gcaagacag  
11761 cggcgcggtc aaaatcgtc cccagctcc gggcggtaat tggctttgtc ctgccggcg  
11821 tgaggtagga aagccgccc cggctctct tgacggtcac accctctgc agcaacagag  
11881 aggaaaactc gtcaaagctg gcggcggtgg caagggtttt ccgtagggtc tgccgagct  
11941 tctccttgtt cgtttcaaac ttggctgcc gggcgctgat actatcggca atcatggggg  
12001 cgttctgctt gtccagcgcg gcctgtccct tttctcgc ccaatactcc cggtcggtga  
12061 cgcggttctt gctgccctc aagaggctga ttgataaag ccctcccgg tggcacatct  
12121 ccatgacttc ggatttgaag tagcgcaggg cagcgtcgtt acatcgggtc ttgagccga  
12181 ctttctgata gcccggcctg tccatgtagg gcaggaacgg cacttctca atccgagcg  
12241 tgtttatgac gatatgcaca tgaatgttc cgtgtggtt atgccctcc ggggtgggtc  
12301 agacaagggc ctggggcgg ggaatgtct tttacagaa ttgtcccc aacgcctgcg  
12361 cccggtctac ggtcaggccc ttgtccggcc cgtcccggg gtcaaagctg atgatgagt  
12421 ggtggctttt cacatctcc cgcgctggt tttctgata gcggagattg gccgcatac  
12481 acgcaacggc aaaatcctcc ccgtcgcagt tcagcgtgga cagccggtag tctcgcggg  
12541 ggataagcct gccggttca tcaaggacgg gcttcatggt aaactcgtca tgctcaaaga  
12601 gaagatattg ctcggcggct ccgtagtcgg cgtttttaga gttgatatgc ttgagtgtg  
12661 ccaaccgct cacctacttt cttgaggact tcatactga ggacggcaag gtcggatag  
12721 gcggcgcgta cctcgcggg aaggggtgtg tagggtacgc cgtattcgtt cagataccgg  
12781 gcaatctgat tgaggtgcc gccgatcctg ccgtactcgg ctgtcagctt cccgacagc  
12841 gaaagcaact cgtcattgac gcagacaca tggacaaccg ggcgtatggt gcgcccgct  
12901 atcgcctgcc ggagaaatc ggaactgctg ataccatagg gcgcaagccg cgctgtgaag  
12961 tcggcatact catcttcgga cagccgggtt tcacaacgc ggctcgggtg gggcgtgtg  
13021 tatttcttc gcatggtgtg acctccttc tcgccgtaa gggcgcata gcagggttg  
13081 gggaaaggc tcccaacaa gttcccgcg aggggcaaaa ctgcagaatt gcggattttg  
13141 gcacctggt agaaactgc tctcgtgac tgcaacttt ctctacttc cgtccgccac  
13201 tttttggaa aactgcaacc aaaaagttt gtttcttt ttctgctact actaatcctg  
13261 taaagggcat tctgcccg tttcgtaaa atgacaccgg acgcagtggt ttctaccgg  
13321 tgttgagaa atcctttctc ttgccctc actacgggta aatgctcaa atgccaaca  
13381 ccagggcaga aaaattcct cctcgttac tactacaacc ggcagggggc aaaatggccg  
13441 ggagcggagc cggacaaca aaaaagcagt aatctttt caagactac tgcttctgct  
13501 ggccgcgtc gtggcggctg gtattcagtt tttatgactt gtccggtggt tcgtcaagc  
13561 ggaactgaa ttgacagca attaacctc gctttacata gtctccacc tcggcgttga  
13621 cctgccgtt cactttgag aatagcggg tatatccggc gtagtgagc aggacagcgt  
13681 tcacggctc tgggtcggc tcacgggctt tgaggattgt tcatagggg agaagtctac

13741 tcataccggc tcaccccat ttcttcgctg agccgctgca aggcaagctg gatatgccg  
13801 cccgctgtgc tgcgtgaccg gccaatcac gcgccgatca cgcgctgcgg ctggcgcaga  
13861 aagtaatagc gcaggatttc ttcccgctc tgctccggca aaacagagat cgcgtcggca  
13921 agggcggcgt tcagagcag gacggctga cgcagacgg taaatgggta ttctcgtcc  
13981 ggctccgacg cggcaaactg gacaaactc tcgttcatca gatagtcaag ggaaacttgc  
14041 cgttccatt gccgtttaag cttcaaaatc ttgtccaagg cggcacagcg gataacagtc  
14101 ttgcaaaagg cgttgtacct gcgctggata tattcttgat aggctatctg gtcggtcatg  
14161 gaaattcccc ttctgaata atagtgcggg gcggtggcac ttcttgctgt cgccccctga  
14221 ttgctacca gcaaaggcgg gcggggctgt caacggctgc gcatatgcgc cgttcatctt  
14281 gaccgtgac tggctcggct gggtttgcta ttaccggac aaacttgaat ttattttaag  
14341 ctatcagtt ttaccttct aagccttact atcattacca taggaatttc ttgttggtt  
14401 ttaaaacatt cttcataaaa tccatcaatg acaaatccag ctctaaaaca aaggttaaaa  
14461 atatcttga tggaacgatg ataataatc tgctcttcg gttgccctc aatcgctata  
14521 tcatagtaac tgtgcggtg catatatttt tcagtcaacg tgacaaaaca aggggtgttc  
14581 gttgcaaaga caaaaattcc gcttctcgc aacagttcat aaacagccat aagaagtgt  
14641 tcaatatccg taatatccat aatggcata ttagaaactg ctttcgtaaa ggctcgattt  
14701 ctttttaatt ctaataact tttctatcg gtcgcatccg ccacacaaaa ttcaattgt  
14761 ttgcatatt gtgattgccg tcttttagcc aattctatca ttttttgc gtaatcaaaa  
14821 gcgacaaccg aagcgcctct ttgtgcaaga tacgaagaat aattccatt gccacacgca  
14881 atatcaaaaa tgtaatccgc aggattagga gatagaagt ccgttacttt gggacgcact  
14941 acctctctgt gaaattcatt agattcgta cccattgcat tatcccaaaa ttgtgcgttc  
15001 tcctcccaga ttttttact ttctctggt ccatgttct ctccactcc ccaaattgc  
15061 tttttgctt ccataaatc ttcttacta tattcattg ttaccctca taacttctga  
15121 ttgtgccgt cttgacgatt atgtatctt acattacctt ctgaaacata tggcgcaact  
15181 tgtccaggcg gctgtttgga cggcggggct ggatgaccgg ctgaccgaca gcggcctgat  
15241 atcctttcag ctctgtaagg catacgtcc gcccgttgt gtaaaaggcc agatcagtac  
15301 ggtatgcctg tatacagcg gcgggaatct cgccagtaaa gacaactca tccttttta  
15361 cctgggccgt ttcgatggtg gcacagtatt tcggtgcatc atgataagcc ctgaaaggt  
15421 attcctgggg cgcatagagg atgaaggaga gataaggtc cagcagctgc gtccccgatt  
15481 cttcaatgc ctgttcaat acaatcgggg ccaatgagcg gaagtccgcc ggcgtgctga  
15541 ccgactgta ataaagccg tattcaaac aaatcttaca gtccgttacg ttccagccga  
15601 acaagccctg ctccagccg taacggatac catccctgac agcgttttga aaactctggt  
15661 tcaagtatcc cagcgaacc cggctctctg attgtacacc ggagccaagc gagagtgggt  
15721 taacagacag tcctatggat gcccaaacg ggttgggcgg cacctcgata tggatgggt  
15781 ggctggctgc tttgagcggc gcctccatat aatgacgga gggttcctt accactgtt  
15841 caagcttga ttttccgac agcaaagcgg aaacaacct caactgcacc cggcccaaaa  
15901 aagaaagaat gatctcatgg gtgatggaat ccaactcgca acgcaaaagc gggtcagat  
15961 ccgcaagtg cgtaagagcg tccagcagcc gttctcttg cgctgccgtt ttcggcgcaa  
16021 tcgtcgtccg cagcatgggg aggggtctct cgcgccact ttacgaggg agccgggtt  
16081 ggtcccctaa tacatgtht aacctacgc tgcgctggg aaggataaca attcacct  
16141 gataagcggg gtctgtccga acaattccc ctttgatgg aatagcatc tctgtgatt  
16201 tcagctttc tctccggcc agggccaccg tatcccgag gcgacagctt ccgctgata  
16261 accgtagata gacacgccgc tggccgcaat cgggtactc aacctgaaa acgctgccgc  
16321 ataggcggc gccccctgt tcccacatcg gttggaacag cctgtcacc gcatccatca



16381 acggttgaat gccaaggcca ttttggcgc tgccatgata gactgggaac agggaggcgt  
16441 cttgaacccg ctgctgttcc tcccgcgcaa gttttcccg gctgattggt tctcctgca  
16501 tatacttttc caataattca tcgtatttt cgatgaccgc atcccatgct tcatgtcgg  
16561 tattttctc caggactatt tccggggaca gcgacaccgt ctgcttgatg ataatatcgg  
16621 cggagagctt atcccgaaca gactgaacca cgctctgcaa atcaacgcca gcctggtcga  
16681 tctgttgat aaagataacg gtgggaatgt tcattttccg cagggcatgg aacagaatac  
16741 gggctctggc ctgcacgcca tcttagcgg agatcaccaa gatggcccca tctaaaacag  
16801 ccaaagagcg gtacacctcc gccaaaaaat ccatgtggcc gggcgtatcc acaatgtaa  
16861 ctttacatct gtgccactgg aaggaaatga ctgccgctg aatggtaatc ccacgctgc  
16921 gctcaaaaaa catggtgtcc gtctcgttgc tcccttttc gacgctccc gtttctgaaa  
16981 tggctccgct ggcatatagc aggctctccg tcaaggtcgt cttccagcg tctacatggg  
17041 caagaattcc aatattgatt atttcatgt gattgtctc ctttacagc ccaaagggc  
17101 ataaaaatcc ccagcagtaa aactttta cactgggga ttataagtg cggacataca  
17161 catatacagc atacacctgt ttgtattgc tgttttggg gatattgcaa aattgataag  
17221 gcaaaagat tcttaaattg ggtacaaaaa actaagccc taaaaagga gctatcataa  
17281 tcctttgtc cactatttg attatagtt tatttaagaa taccttgccg catattttt  
17341 actcctttc tggattaaat cattgtatca catcagttt aggaaagcaa gtacctaaa  
17401 gaaattttc tccccttat atgtaacaat cataccgct tctagcgtt cagaatgtt  
17461 tctgctgtc gctgtggtg ttggttgaa ttgtccaacc aaaagccgat ccgtggtgt  
17521 gtctgattt tactaaatac aaattcaatg tatacagaaa gatataagga gtgggagga  
17581 tccgccgta gttggcattg taggaaaatc caaaagtta gattttcca caatgctat  
17641 cttttggtc ttggttcgga atagttagt gctggcggc tatctctgt ttcggttg  
17701 ttgcttctt accgtacatg agcatttga ccggggttat cgttgccgta gccttcaga  
17761 aggttgatc gcccccagat accaagacct gcaccgagag ctactaccag agtctgcagt  
17821 acaccgactg cactgttgaa aaatgccata agtttgcct ctttgcccg gatccgaagt  
17881 atagttggtg gataaccgga ccatcagtaa tgaaaaatgt ggatataaca aagccctc  
17941 cgaagccgca tgtgcacctg cagccggaga agggcagaaa aatagccaga actgatgat  
18001 agtcaatcct ggctatgtaa aatgtattg tcgatttcta atttgtta tggccccata  
18061 aatgaaatca gatcatatcc ttttctta cctacttca tcatgtattc catacagatg  
18121 acgaacctgc ggtaaaaatc aatgatcaga tcaatttctg tttatctc tgcggcctg  
18181 ttggcattat aggtttat ctggtctca ctatattc ttgcataaag caattgata  
18241 gtggcagtc cctttttc tctaatttt gcggtgaact cgttatctc tctgaaatc  
18301 agagcatcaa ttgtgctgt aatagattc aaaatactg ttattgaatc gaaggtgaag  
18361 aaattgtgtg tcaagtacca ttcaaacct tgtgcatcgg ctctgtttt attagcttc  
18421 agttcatcat caaagaattt ataaaggaat ggggtaaggt attggctaac atcatctcc  
18481 tcaattgaga tttcagtact tctatttca gcaacagaat cgagatttc tgtgttgaa  
18541 tagtcaatca ccctaccg cataatcaa aatatgagg aactatcatg accatcgaca  
18601 atacgaattt ctccttgaa gatgtctctg ccaataaacg caaagcaaag attctttact  
18661 tggtttagaa tttgctcgtg atttgatga aatgccaatg cgtgtcgaag cagtttttt  
18721 aactctcat atgacttga gcatatatc gactctaaca aaaacctgtg tgtgtgtgg  
18781 tatattccc catctgacat atagttcggg taatctcac gaagcaagtc cagcatatc  
18841 ctaatgcaaa gctgttccgg attgcagaat ctatgaaat ccgtttctt ctgcggagcc  
18901 tttcatcca atgcatcat gagcactct ttgctgacat catcatagtt tctaacggtt  
18961 atgtggtcat tacctgatt tctgtattt ctcaatgct tgtattcgac gtcataatg

19021 tagtaaagat atccgcatg agtaataaag ataagat ttttctggaaa tcttactgct  
19081 tcaaaatcat caaataat ttttctcattc tatctcctta ctcgctcaca cactatttca  
19141 agcgaatata gcaggtgat tttccggctc cttcgcggtt cagttcgccg gatgccacca  
19201 ttttccgcag gcacactca acagaactaa ggctcagtga aggacactgc tccctgatat  
19261 cctgcttctg gaaacgaccg attttattca aagcagcctt gcgaaccata tcaatggcag  
19321 gaagtttctc ttcacgatg gcaaatctgt cccgaagtc tttatacgca gccagaatgg  
19381 taccaagcag atatttaata aacggaactg catcctcggg tccttcatgc cagccatgct  
19441 gtgcacgggt cagtgctca taatacaaat cctgttttt cgcgatctgt gcctccaggg  
19501 agatatattt tccaacgtag aatccgctgc gatataagag caacgtcgtc agcaagcggc  
19561 tcattctgcc attgccgtc ttaaaccgat gaatgcacag gaaatcgtgg atgaagattg  
19621 gaatagcaat taagggtcc aattccatat tgccgatcac cttgtgtac tcctcacaga  
19681 tccgatccag ggctccggc gtctcgaacg gggccagggg agtgaagatg attcgggat  
19741 gaccgtcagg gaaagtcgctg ctgatataat tctgtacatt ttcgtctgt ccggccattg  
19801 gggtattcat atggctgtac attatcttat gaagctgcag gatatagttc ttgacagag  
19861 gaatggcatc gtagcttctg tgaataatag aaagcacatc tcgatcctt gcaatttctt  
19921 gctgctctt gttctttggc gtggttttct cctctaccag ctgcctgatt cgtgtattgg  
19981 tggtaacaat ccttcaatg gcattggatg cctctgtact ctggatctt gcgatttcaa  
20041 ccagcttctc caattcattc gggcgttgc tcaagtaaag ctctgttta ccggcctctt  
20101 tatagattgc agcaataagc ccaaggatct cagaatcca tttctgattc ttgatagctg  
20161 agtaataaaa agttctcatt cccttagcct ccatctttt cccttatatt atattcatt  
20221 ataaggaat agtcaacatc tcggggggat ttatcctta taatacccaa caaataaggg  
20281 aaagatgcta cgagtaaggg atagtattcc catatttcca gtaccttatt cgttacatgg  
20341 aatagcagtc acacacgata cgtgcatgac tgctatata tcgttcatgg gttataacag  
20401 gcgttgccac attgagctgt tctcagtcag ttcagtact cagagagagg cttacctcg  
20461 catccttct ttgcataata atccagcatc tcgtcagcct tttcaaatc gtagctggtc  
20521 acgagtcgag agatgacatg aacggatat ccggcttgg tcatattaaa gcaggttgac  
20581 ttcacacagg ctgtggcatc ggcaccgca atataaaact cgccgatccc gttatcgga  
20641 ataaacgcgg aaaaggctc gctggtcaga gcattgctt tggcttaac aaagataggg  
20701 tcggatacta cctcagctc cggaacaagc tcggcacctt tggatccgg cttaaaggtc  
20761 cgtgttccgg cgggatggtt atgatgctg atatacaga tgcataacc acgttttca  
20821 gccattcaa tggctgtatt caaattgta atgatcct tataatgctt tgtgatgca  
20881 ttctggatat caatgacaac aagagcttga ttcataagtc tgctccttt tttcgtgctt  
20941 ccttgcggtt aatgggatgt cggatgaccg ttttccattt ttcgggagca accttgcgtg  
21001 catcagacag gtagatttcg tgatgaaggc ggctgtctga gaaatcattt tcatagccgc  
21061 ttcaggagag atactcgtc ataagtctca ccgtagcagg ttcgtcgtca aatggaccaa  
21121 tgtgatgat ctgaacacaa agccctcat ctatggctcag gaattccgcc ttgctgcatg  
21181 ccagatgttt ctttttctcc gcttccccg tggcccaatc aaagtcttc tgcgtgacaa  
21241 aatcggggag gcggatcacg gagatccagt tgaaggtgga tttgtcgtg taatcaatgc  
21301 cgtcaacgcc ttctgccac cagaagcctt ccagcggagg caccacatag tcgaagaagc  
21361 cctcagatgcg ataactgtc ttatagctca tcttgagagt ataggccacg gcatacagga  
21421 tgcccaccgc ctgctgatag gcaccgctt cgtcgttggg atcaccttt cctctcagc  
21481 caatataatt tgccttccgt accgtcacia tttccggctt acttttggc atataaaatt  
21541 ctttatactc tttctaaaa tcaaatgcca tcttctttt tctcctgtt cctgatactt  
21601 tgctctaatt tcggaagaaa ttttctgag ctttccccga acagactgtg gttccagcac

21661 agtcaacttta tccctgcagg acagcagcca agaaatgaga ccctttcat ccatttcct  
21721 ctgaaaaagt aaggagccgt ccgttgaat ctgataggac gagacgcat aactttcgat  
21781 cagatgccac ttcattggaag gatcaaaaaa cgccttcagg cgaacattgg ccggaagaa  
21841 ctgtgttgtt tcaaatccg gcatgggtac tactctctt tccacaggtt caccggcatg  
21901 caccagatga tccatgcggt tcagctttaa catgcgaaag tctgctttg ttcggcaaaa  
21961 gccccagaca taccagctgc tccactgaa gatcagataa taggtgtcga tcaggcgcgt  
22021 gctttctct tttggagagt aataatcaaa gcgaatgcc tgctttacct cgatggcagc  
22081 ctgtatcaac tcaatTTTT cggagacagc ctctttgtt caggaagata gatcaatcag  
22141 gatcgtatc tttccatgaa caaaatcaga ggatccggct ttgattttt ccataagctg  
22201 actgtaataa tggctccgc tgacactgtc cagactccga agccctgcca tgatcatctg  
22261 catatctct gaagtgagaa gggtagatc catgcggtat ccgttcata tctgaatacc  
22321 accaccaca cctgtgttg tgacagattg gatccctgct ttgcatagat catcaatgct  
22381 cctgttgatt gttcttttcg acacttcaaa atgctctgcc agttcaggcg ctgctgtttt  
22441 ttcttttgg agcagaagg atagaatccc taccattctg tctatctta taatggttc  
22501 acttccggtt atatgatc aaggtaaaca cgacaactat atgcatggt tatattacta  
22561 catccaaaat aagaatgaaa tagcaatag taagcaggca gcttgcgcc cctggccgga  
22621 tttactgtc cggcaagcag tctgactcg gattaaccga agagtccgga aagcagagga  
22681 accagatga taccgatgag ggccacgcc ccaccggcca tcaactgct catacctga  
22741 gactttgct atgtgtgata aagaagcaat agaagtcaa aaaatttgc cgttcctatc  
22801 cgacacttg ccattgtgtc ggataggtc ggcggttatt cgggcaagtc aatcttgccg  
22861 acaaagctg aataaatctc aatgtcctgc ctgcgggtgc cgttctatc atagctcac  
22921 tcatcacca caatttctc gatcattcc cgcaagagag tgggggtcag ttctcaaag  
22981 gcaaggtgct tgcggacaat gccataaat ttctcggcgt tgacggtagc tgctgtgac  
23041 ttgtccagtt cggcttgca ggcgccgct ctcttttca gctccgctg ctccgcttcg  
23101 tagtcagccg acagttccat gaaacgtca tcgctgatt tgccgttac attgtctca  
23161 tacagccgct tgataatgcg gctgattca gaaatgcgt cctgcgctg tcaagctgc  
23221 ttgatggctg cggcggtctt tcgctgccc cgatctctg tctgctggac aagtagttc  
23281 acaaaccggc tctatgctt ggctgcgtat tcggtcact gccggagatt tgccaggaca  
23341 ccagcggta acagatcggc gcggataaag tgcgccgtac agttcgggt gcgcttctg  
23401 tagctccgc agatgtagca gtctgtttg cggctttgt tctgatacc ctgctgatac  
23461 agcacatggc gcagtcggc gcagaacaaa atcccggaga acagcccccac tcatcgtag  
23521 cggttcgggc gtttgcgct tttgcgtaac tctgcaccc gttccatgt ttcctgtcg  
23581 atgatcggct catggtggtt ctgaaaatg gcctgcttct cgacggggtt ctctatgctg  
23641 tgcttgacct tataagaagg ctttccgtt ttgaagtca ccagacatcc ggtgtactt  
23701 cggttttcga ggatagaac gacggtgtt gtcgccatt tgactcata gcctgggtga  
23761 taacggcggg tgctgcctg ccgctgatat tccagctcc ccggcgtggg gattgctgc  
23821 tccgtcagca tacgggcaat cttggtcggg ccgttcccgg caaggcaaag ctggtaaat  
23881 tgctcacca ccggggcggc ttctcgtct ataataaaat tctcgtctc gtccatcaca  
23941 tagccgtaaa ccgctgtct ggtaacaggc ttgccgctca tgcctttga cttttact  
24001 gccttgattt tcttctcgt atctctacc agccattcat tgaacagatt tgcagcggg  
24061 gtaaaatcgt tgcctatcc ctgctggca ctgtccat tctcgtgac agcgataaaa  
24121 gcacaccct tttagggaa cagcattcc gtgtaaaacc ctacctgcaa gtagttcgc  
24181 ctaaccggc tcatgtcctt gacgatgacc gtaccactt tcccggctc aatgtccga  
24241 agcatggctt gaaatccggc ccgctggaag ttcgcgccg aaaaaccgtc gtcggtgatc

24301 cagcgcagat tggtaaagcc gttctgttt gcgtaggtt cgagtatcct ttttggttc  
24361 gatatggaat tactctcgcc ttgcaattca tcctcgtggg acaatctcgg ataaagggcg  
24421 gtaatgaggt tttgggtggc ttgtctaac ataaaatcct cgtttccga cagccagccc  
24481 cactattccg tggtttcatt gtaccacgga acggcggggg ctgtacagcg gcaaaagcgt  
24541 taaattgct tctttacagc tttcaattt tccgatttt atggtatggg ttgtcgtcc  
24601 atattgcag tagaaaagtt cataactccg tggatactc tgatttaaca aaaaaatcag  
24661 aagttaaagg agaaaacatg aagtataca tagatgaatt aaccgcgcc aaaaggcaaa  
24721 ttgattcaac tctgcacaag ctaagagaaa cagtaaaaac attgaaatca aaggataatt  
24781 ccgagcgtta taaatcaca atcacattgg caaagagaag aataaaagcc tttgaaattg  
24841 caaattatt tatagagaat gagattaaga attgctaaag cacttccgat tttcgtcca  
24901 gcggtcatgc tccctggcat ggccgcttt ccatgcccc gttcacgcc gataagtcgg  
24961 ctctgtgta gcagcggctt ccgctccag taccgcgcc atttgtcgg cggctgtgt  
25021 tgtggtgtct tcttgaat agccggacac gacaaggac gaattgcca tgcgatttc  
25081 cgtcacacag tcagggcggc ggggtgtgc ggtgtcgtc tcttattat ctgcatagg  
25141 caatactct ttcagtcggt aatcagttt tcatgctct cattttccg ctggcgggt  
25201 tcctgccga agttgtgcc ggtaaagcgt accgggacgc acatggaaag caggcggta  
25261 taaatccggg aatggcggt gtctccggg ttgtcaggt cgtccagcgt aagttggtc  
25321 gtgacgatca gcggttgc gctgcgtaa cggctgcaa tcacattgaa cacctgtcc  
25381 agccgtatt ccgtcccgc ttccatgcc aagtcgtaa ggatcagcag cggatacga  
25441 caaaggcggg aatgtactc gttgcgccc tcaaagctgg cggcaagtc attgaggata  
25501 agagcaaagt cgtcatgc gacggggt tctttctca tgagggcgtt tgcgatacag  
25561 cctgcaaggt agctttgcc ggtcctacg ccgcccaga acaggcagcc gatattgtc  
25621 gtccgatata ctccaatg ctccacata cggcgggcaa gcccggtctg cgggttctg  
25681 ccgtgtcgt tctgaaagt ccagtcccgc atggtgggt cggtaaagcc ccggcgttc  
25741 agttctcca cgtgtcaag gtgtcgcg cgctttcgg cggctcccg tcctcgcgg  
25801 gcggttctt ggagtcgca ctctccggg tggcggctgc gccgaagat agcggccta  
25861 tccggcga aataggctt ttcggctt cggcactgc cgcagtacag taaaccgtc  
25921 tcgccggtg agtctccg ctccgggatg gtggtcgtca tatttccaa aaccgcttg  
25981 attcattct cataaactc tcgctctc tcatgagta gtctggtatg cccttttag  
26041 gggcttctt tttgtctt cccgccata tccgagggc ggcggcatag ttctgtagc  
26101 tttcccgtt ggcggcaagg tagcggctca ttcctcgt gaaccgtcc agcctgtcag  
26161 ggtactctc ctgcaactc tctattcgg tctgtacag aaaaatatt ccatatcggc  
26221 catagggcgc ggacggccc cactcactc ctttgttg gctctctgta aggtgttta  
26281 tagtagttg gtaggggac ggtttccga ccatcataag gtcggtttc tgaccatcag  
26341 taggacggtt tccggctt atgagggg cacttccggc catcagttg tctgaaaact  
26401 gtacctgtg cactggcgtt acttgacat aaagccggtt cgtgcggag aagccgccc  
26461 gttcccgtt caacagccc gccgttcca gttcattaag cccccctt atggtgtg  
26521 tgcctttatc cagtattct gctatctc cgtatggata gataataa atctgcct  
26581 cgtcgtccag ccactgtt tctgggaga ggggtgaac gtctaacagc agcgaatac  
26641 gcagctggc ggtctgtgaa atctcattt tcagcaggaa acggggatac ggcagatag  
26701 cgggcagcc cgtgtctc ctgatataat cagcagatag atcacctcc tgtgtcgg  
26761 ttgatttgg cgtattgtca gcattaaaa cgccgttcc ggggaaaag gataaatgta  
26821 tcggtacc tttgacacc acgaaaaag ccttgattta tgcgggttg aaaggctta  
26881 aagcgtgaca tctctgctt ttttccgt tctctcggc ggcttgatt tcttcatgc

26941 gcccgccgca gtcggggcag tttttcccc ggttgattt ggggacaaag gccgccccg  
27001 agacggcaca ccgtttccg cttccccggc acaagagggc tgcggccagc tccccgtaa  
27061 ggggcaggac agccacacgg aaccagtggc acatgagggg aaaggaaatg ctctggacgc  
27121 acacgcaagg ctccccgctg tccaatagca ggcagttccc ctatcgtag ttacagcact  
27181 catgtaccag ccgccgcgcc cgccgggtct ggcggtagtc catgtggggc aggttatcgc  
27241 tcatggctct gtcctttct gcggtgcggc tcgtcccggc gcaaaatctg gtcgatgttc  
27301 cgcttgacgg tctgcaactc cttgaaccgc tgtttctgtt cgtgataggt gttatacagg  
27361 ccgtctttc cggagataag ctgctgatc tcggcctgca acgctttccg ggcgggcagc  
27421 ttgtaaatgc catgcccctt gaaataccgg gctgctgctg cggctatgat aaaatcgtc  
27481 tcatgggctt gccggatgc ggcgcgggct ttctcggatt tctgtccccg cagcccgtc  
27541 cgggcggcct tggctgggc gtaggccaac acctgccgt gcaacttctt tttccttgc  
27601 agcttcgtt ccagtctt cagttcggc ctggtctggc gcattttctg ataggcggg  
27661 tcaacggcg cttctaactc ctccggggaa gtaaagccgt attgctggta gacggacagc  
27721 gtttggcgg cctgctcag attgtatc ttcgccagc gttcatagcc ccggccttg  
27781 ccctcgcca ttttctctc aatgtccaca agccgctgca ctccgtctg tttcggggcg  
27841 gctatctcg cctggcaac ctgcaagcgg tctttatgg tgcgtggggg atcgggggat  
27901 ctggctggcg cttcggctg tctggcggcg ttttctcta aaacggcaa gacagcggcg  
27961 cggtaaaat cgtgccag cttccggcg gtaattggct ttgtctgtc cggcgtgagg  
28021 taggaaagcc gccccggct ctcttgac gtacaccct cctgcagca cagagaggaa  
28081 aactcgtca agctggcggc ggtggcaagg gcttccgta gggtctgcc cagcttccc  
28141 ttgttcgtt caaacttgg ctgccgggc gtgatactat cggcaatcat gggggcgtc  
28201 tgcttgcca gcgcggcctg tccttttc tgcgccaat actcccgtc ggtgacgcgg  
28261 ttcttgctg cgttcaagag gtcgattga taaagcccct cccggtggca catctcatg  
28321 actcggatt tgaagtagc cagggcagcg tcggtacatc ggtgcttga gccgacttc  
28381 gtatcggccg gcctgtccat gtagggcagg aacggcactt cctcaatccg caggctgtt  
28441 atgacgat gacatgaat gttgccgtg tggttatgcc cgtccgggtg ggtgcagaca  
28501 agggcctggt ggccgggaaa atgctctta cagaattgtt ccccaacgc ctgcgccgg  
28561 tctacgtca ggccgttgc cggcccgtc cgcgggtcaa agctgatgat gtagtggg  
28621 ttttccat cttccgccc ctggttttc tgatagcggg gattggccc catacacgca  
28681 acggcaaat cctccccgc gcagttcagc gtaggacagc gtagtctc gcgggggata  
28741 agcctgccg tttcatcaag gacgggctc atggtaaact cgtcatgctc aaagagaaga  
28801 tattgctcg cggctccgta gtcggcgtt ttagagtga tatgcttga tgttccaac  
28861 cgcgtcacct acttcttga ggacttata cttgaggacg gcaaggcgg atatggcggc  
28921 gcgtacctc ccgaaagg tgtgtaggg tacgccgat tcgttcagat accgggcaat  
28981 ctgattgagg ttccgccga tctgcccga ctcggctgc agctcccga cagcggaaag  
29041 caactcgtc ttgaccgac acacatggc aaccggcgt atggtcgcc gccgatcgc  
29101 ctgccggaga aattcggact ggctgatacc atagggcgca agccgcgctg tgaagtccg  
29161 atactcatc tcggacagc gggttttcac aacggcgtc cgggtggggc tgttattt  
29221 ctttcgatg gttgacctc ctttctgcc cgtaggcg catgagcagg gtttggggaa  
29281 ggcactccc aacaagttc ccgcgagggg caaactgca gaattcgga tttggcacc  
29341 gtgtagaaa cttgctccc gtgactgca actttctc acttccgtc gccactttt  
29401 tggaaaact caaccacaaa agttgtttc tttttctg ctactacta tctgtaaag  
29461 ggcattctc cccgtttc ctaaatgac accggacgca gtggtttta cccgtgtt  
29521 gagaaatct tttcttgc ccttactac ggttaaagc tcaaatgcc aaacaccagg

29581 gcagaaaaat tccctcctcg cttactacta caaccggcag ggggcaaaat ggccgggagc  
29641 ggagccggac aacaaaaaaa gcagtaaadc ttttcaaga cttactgctt tcgctggccg  
29701 cgtcgggtggc ggctgggtatt cagttttat gacttgccg gtggttcgtc aagccggaac  
29761 ttgaattgac agtcaattaa ccgctgcttt acatagtctt ccacctcggc gttgacctgc  
29821 ccgttcactt ttgagaaata gcggatatac ccggcgtagt ggagcaggac agcgttcacg  
29881 gcttctgggt cgcctcacg ggctttgagg attgtttcat aggggagaag tctactcata  
29941 ccggctcacc cccatttctt cgcgtagccg ctgcaaggca agctggatat gccgccccg  
30001 tgtgctgcgt gaccggccaa tacacgcgcc gatcacgcgc tgcggctggc gcagaaagta  
30061 atagcgcagg atttcttccc gcgtctgctc cggcaaaaca gagatcgcgt cggcaagggc  
30121 ggcgttgacg agcaggacgg tctgaccga gacggtaaat gggatttctt cgtccggctc  
30181 cgacgcggca aactggacaa acttctcgtt catcagatag tcaagggaaa cttgccgttc  
30241 ccattgccgt ttaagctca aaatctgtc caaggcggca cagcggataa cagtcttga  
30301 aaaggcgttg tacctgcgtt ggatatattc ttgataggct atctggctgg tcatggaaat  
30361 tccccttctt gaataatagt cggggcggtt ggcacttctt gctgtcgccc cttgattgcc  
30421 taccagcaaa ggccggcggtt gctgtcaacg gctgacgata tgcgccgttc atcttgaccg  
30481 ttgactggct cggctgggtt tgctattac ccgacaaact tgaatttatt ttaagctatc  
30541 acgttttacc ttcttaagcc ttactatcat taccatagga atttcttgtt tggttttaa  
30601 acattcttca taaaatccat caatgacaaa tccagctcta aaacaaaggt taaaaatc  
30661 ttgatggaa cgatgataat aaatctgctc tttcgggtgc cttcaatcg ctatatcata  
30721 gtaactgtgc ggtgtcatat attttccagt caactgaca aaacaagggt gttgcgttgc  
30781 aaagacaaaa attccgctt cctgcaacag ttcataaaca gccataaga gtggttcaat  
30841 atccgtaata tccataattg ccatattaga aactgcttc gtaaaggctc gatttctttt  
30901 taattctaata atacttttc tatcggctgc atccgccaca caaaattca tttgttttgc  
30961 atattgtgat tgcctgctt tagccaattc tatcattttt ttgctgtaat caaaagcgac  
31021 aaccgaagcg cctctttgtg caagatacga agaataattt ccattgccac acgcaatc  
31081 caaaatgtaa tccgaggat taggagatag aagtccgtt actttgggac gcactacctc  
31141 tctgtgaaat tcattagatt cgtcacccat tgcattatcc caaaattgtg cgttctcctc  
31201 ccagattttt ttactttctt ctgttccat gttctctccc actcccaaaa tttgctttt  
31261 tgcttcattt aaatcttctt tactatattc cattgttacc ctccataact tctgattgtt  
31321 gccgtcttga cgattatgta tctttacatt accttctgaa acatattggc cacttcttc  
31381 aggcggctgt ttggacggcg gggctggatg accggctgac cgacagcggc ctgatattct  
31441 ttacgtctg taaggcatac gctccgcccg ttggtgtaaa aggcagatc agtacggat  
31501 gcctgtatac agcggcgggg aatctcgcca gtaaagacaa cttcatcctt tttacctgg  
31561 gccgtttcga tgggtgcaca gtatttcggt gcatcatgat aagccctgga aaggtattcc  
31621 tggggcgcat agaggatgaa ggagagataa ggtccagca gctgctgccc cgattccttc  
31681 aatgcctggt ccaatacaat cggggccaat gagcgggaagt ccgcccggct gctgaccgga  
31741 ctgtaataaa gccctgattc aaagcaaatc ttacagtccg ttacgttcca gccgaacaag  
31801 ccctgtcca gccgtaacg gataccatcc ctgacagcgt ttgaaaact ctggttcaag  
31861 tatcccagcg aaaccggct ctcgtattgt acaccggagc caagcgagag tgggtgaaca  
31921 gacagtcta tggatgccc aaacgggtt ggccggcact cgatatggat ggtgtggctg  
31981 gctgctttga cggcgctc catataaatg acggagggtt ctttaccac tgtttcaagc  
32041 ttgtattttt ccgacagca agcggaaaca acctccaact gcaccggcc caaaaaagaa  
32101 agaatgatct catgggtgat ggaatccact tcgcaacgca aaagcgggtc agtatccgca  
32161 agttgcgtaa gagcgtccag cagccgttct ctttgcgctg ccgttttcgg cgcaatcgtc

32221 gtccgcagca tggggagggg gtctcgcgc caccttttac gagggagccg ggtttggctc  
32281 cctaatacat cgttaacct cacgctgctg ctggaagga taacaattc acctgataa  
32341 gcggtgtctg tccgaacaat tccccttg gatggaatac gcatctctgt gattttcagc  
32401 ttttctctcc cggccagggc caccgatcc cgcaggcgca gcgttccgct gtataaccgt  
32461 agatagacac gccgctggcc gcaatcgggt tactcaacct tgaaaacgct gccgcatagg  
32521 gcggcgcccc cctgttcccc aatcggttgg aacagccctg tcaccgcatc catcaacggt  
32581 tgaatgcaa ggccatttt ggctgcca tgatagactg ggaacagga ggcttctga  
32641 acccgctgct gttctccc cgcaagttt tccggctga ttggttctcc tgcgataac  
32701 tttccaata atctatcgtt atttcgatg accgatccc atgcttctat gtcggtatt  
32761 tcctccagga ctatttccgg ggacagcgac accgtctgct tgatgataat atcggcggag  
32821 agcttatccc gaacagactg aaccacgctc tgcaaatcaa cgccagcctg gtcgatctg  
32881 ttgataaaga taacggtggg aatgttcatt tccgcaggg catggaacag aatacgggtc  
32941 tgggctgca cgccatctt agcggagatc accaagatgg ccccatctaa aacagccaaa  
33001 gagcgttaca cctccgcaa aaaatccatg tggccggcg tatccacaat gtaacttta  
33061 catctgtgcc actggaagga agtgactgcc gcttgatgg taatcccacg ctgccgtcc  
33121 aaaaacatgg tgccgtcct cgtgtcct tttcgacgc tcccgggtc tgaatggct  
33181 ccgctggcat atagcaggct ctccgtaag gtcgtcttc cagcgtctac atgggcaaga  
33241 attcaatat tgattttt catgtgattg tcctcctt acagcccaa agggcataaa  
33301 aatcccagc agtaaaatac tttaccact ggggattata agttcggac atacacat  
33361 acagcataca cctgtttgtg attgctgtt ttgggatat gtcaaaattg ataaggcaa  
33421 agtattctta aattgggtac aaaaaactaa gccctaca aaggagctat cataatcct  
33481 tgttccact attgattat agtttttt aagaatacct tgcccatat ttttactcc  
33541 ttttctggat taaatcattg tatcacatca gtttaggaa agcaagtacc taaaagaat  
33601 ttttctccc ctatatgta acaatcaca cggttctca gcgttcagaa tgtttctgc  
33661 tgtctgctg ggtgttggg tggaattgtc caacaaaag ccgatccgtg gtgtgtctg  
33721 catttacta aatacaaat caatgtatac agaaagatat aaggagtggg agggattccg  
33781 ccgtagttgg catttagga aatcaaaa gtttagatt tcccacatg ctatcttt  
33841 ggtcttggg tcggaatag gtatgctgg cggtctatct ctgttttcg gttgctgct  
33901 tcctaccgt acatgagcat tagcaccggg gttatcgtg ccgtagcctt ccagaaggt  
33961 gattgcacc cagatacaa gacctgacc gactgctact acgagagtct gcagaacac  
34021 gactgcgctg ttgaaaatg cmetaaagt ttctcctg attgtccgc ctatgtggtc  
34081 gggataatga aatgaaatt gcccgcgat tccggcatg tgcactgca ggaaaagaag  
34141 ggaataaaaa tatccggggc cgatgatcag tcagtcccgg atatgtaaac aggcagcaag  
34201 ctgccgctg ttgccgagc atttactcat ttgttctgc tttctgcag ccgagtgtt  
34261 ccagaatacc tttcagatg ttgcgctt gggcatatt gtctccgga tccaaccga  
34321 tccagatggt tgctgacct gggctggcat caatgctgat gatgtgatct gcattgat  
34381 actcctcacc ggtgtatag aatgtcgca tttgcctc tacctggcag cttcctgct  
34441 cctggccgc ttaccggaag ggctggctgc cgctgttct tcctccggt cagacaagtc  
34501 cgagaggaca gagcctctgg atttatctt ataggactcc atcagggcct tcagttccgt  
34561 gttgctact tctctgctc cacgaccca ggtggatct ccggttcat ccagccggt  
34621 cttaccgaa cgggaaagcc gggtctgacc atctcgggg agcttcatcc agacgctt  
34681 tccgaattga ttatcgtgaa tcatctcgg ggagatcaca aaggattccc agggacgggt  
34741 atcggctta tccgattcg ggatactgac ttccaccagc tcctgccc tttcgaagt  
34801 aaaggactca cccagagcc cttaccaaa ttgatcgtt acctcgcca gcggctggcc

34861 aaaggtttcg ccacgcgcca tggcttctc cgcttctctt acgaagtcgg gaacatccat  
34921 cggcaacgga tttcttcat ctgccattgc ggcttacctc cttattttc tgcattata  
34981 acaaaaaact catccttcgg atgaagcttt gccctggtag tcaggtactt ctaatgtcg  
35041 aaggtgagtt tctatcata atcggcggtg tattttagt tccgggtgctg ggtcagatcg  
35101 tatttatccg acaggaaggg acgaacgcct ctacagtgaa ggacacattt gctgccgtcc  
35161 ataacagcca gttcatcacg actcatgagc tccttgcca gcttctgga gttggttccg  
35221 tagcttgac tattgcctcg tgcattccgag gtattgaagg taccgatggt tctttgccg  
35281 agtgcttcgg agagtcttt cagagccgcc caggaatacc tggcagcca tgttccgat  
35341 gatggtattg gcattgtcct tgtaaatagc cttcagctga gacctgct gcagcaccag  
35401 acaggcactg atctcacggg aacggatggt ggcaaccagc tttccaggt tccggatctg  
35461 gccgatgtt gccgcctcat gcacaggca ccgacatga accggaagcc tccgctgta  
35521 aacatcatcc gcttttcac acagcagggt gaacagctgc gtgtagatca tactgatcag  
35581 gaaattgaag ctgccgtctg tatctgacat catcaggaac agggcagttt tttcatctc  
35641 cagagtatcc agtccagct cgtcacaat ggtgatatc cggacctct gaatatcaa  
35701 gggagcgaga cgggcaccgg cagacaccag aatactttc agagtcttc ctgcagccag  
35761 cttgaactg gcatttccc ggactgcgaa atggccggc tcttctttt tcaggtctc  
35821 aaacatcaga tccaccgat tctgaaaac ctcacatcc tcaccgacct ccatggcatt  
35881 gataaattcg atgagcgtg caaagttctg ttctccttg ggtgcctcat aatggatga  
35941 gccgatgaga gcacaataga gcagtgtctc tccttctcc cagaacggat cggccctt  
36001 accatcccc ttgtatttg ccatgagtg gtcgtcagc ttcagatat cttttcgt  
36061 gtggatatag gcgaaaggat tatagtgcat ggacttgta aaattgattg tttgaaat  
36121 ttgatccgg taattcgcag ggacaaatgc attccaacc tcgagcagag tctgccctt  
36181 cggatccgtc agaacatagg aagaatgaag ctgcaacaga ttcggctta tccagaaccg  
36241 ggtttaccg gaaccggagc cggcagcat cagtacattc ttgttctgg cattagcagg  
36301 attctcggg cggttgtca tcatcagtc ttctgtctt gtgaggatca cattgtctc  
36361 aaagaccgga tcgatgaaag gctcagatc ctcgggcca cccatcggg cagaaccata  
36421 ctcaaggta tgctaaaat tttggcatt cttccccg atgtagacag cagtcctcag  
36481 acctgcccc cagatcaggc caaccatca gtcaatggga tgaaagctc gaagaggatt  
36541 tccgaaagca atgcccacg tcgtgaagaa tgacagcagc tttcggag cattcgcgc  
36601 ctccgcatt cggcaggct ctccagatt ggtacagacc agaccaatca gaatatagg  
36661 gagggcccg atcagaagct tttcagctt aacggatcc gggctcatc gcactgctc  
36721 ctctgttg cctgcttac cacctcgcg gggatatctc taacggcatc gatcagctta  
36781 tgcagcgtc tcagaacgct cggacgctt tctttgcca gtatctctc agagtaggca  
36841 ttgaatgccc ccgtatggc atccgctct ctggcctta agaaccag gtactcgg  
36901 ggaagtacg attatcctt ggtgattgca taatcgacac cgtatttccg tgcatactt  
36961 tcaaagcct tcaggtctg tttgaaatg tcgatattg tgacgccctg attctgacc  
37021 atcaactcct gaatggtctg cttgccggtg ggcttctcat ttttattgc tgcttctga  
37081 gatttctgct tgatataagc gataccctc aggccaagtc ggacaatac gcgagccgta  
37141 agcttggctg tgctgatggc caaattcact gtctgtttt ctacttctc ctgcaatgct  
37201 caccactcc tcagttcgt tttccggca tcatgcctt tttccggcg agccctccac  
37261 cttcataatg ccgtcaagag tcgtagcggc aatacggagc ctcttgcca gaccgatc  
37321 gtcttgacc tgcctacca tcgagtcgcc gcaactacg agaatgcggg atcttctgag  
37381 aagctccgat gcccttcaa tctgtcctt gtgctcctg ggaatctcat ctctaaag  
37441 acctctgac atgagtctc gacagatagg agaaaacct gcatcataca ctttccgga



37501 ataacgcagg gccgtgcttt ttgcttcaaa ttcgttatca ctccagtttg cagtgatata  
37561 tgccagtggt ctaacatgt gtacctcctt attcaacat cattagtac cgtcatgctc  
37621 agacctttg tgcttcggct taccgcaat ctcttcggca gctttaccg cttcgcgtgt  
37681 ctggagggcc tcttcgggaa tagggagcgc catgatgctg cgtcccattt tcacgaaggc  
37741 ctccggctgg tgaacagct cttcaactt gccgacctgc tccggagtga gggaaccgaa  
37801 gctgtcctcc gtaagaccgg tcaccaggaa ggaaccggca atcacatcat aaacctcatt  
37861 gtctcatca cgaagagcac ggttgagagg aagtccgttg attttgcct cctcattgac  
37921 aatcagacca accggatcct cgaagggata aaccacctcg ataaaaccg ctaccagctg  
37981 ctgaagatcc tcaaggccgg tctttgctc aatgacctc ggggtctcgt tgggttcgac  
38041 aagaagcatg gtaatcgtat ctgcctccac caatccagcg ggctcatcgg caagcatggc  
38101 ttctactctg gcagcctcgc gggcctcaaa ggtacgggca tttcaaaga tatgccttc  
38161 actgtcgtag tggaacacat tctcggagag ccggtccgca ggggcaacct ccgcctcatt  
38221 gatgcttcgc accatttctt ccagatgact gagctccata cttccgtcat cggcaatgaa  
38281 cagaacttca tggattgaag aagggagaac gtagaatcg ccgccatcg tttcagccgc  
38341 ctgatccaga aatccggat actgaatggt gcaggcaccg ttctgaccg cctctaccgt  
38401 agtaccag atgggagaag gatcatccgg aataaacata ccggcagcat cgccatcat  
38461 gtactcatg acatcgttca tgttgcaag ggtcgcggga tggttctgca cggcagcttc  
38521 catggcatcc gaatgaagct gatccgagc aatgtcatag gtctgaagca tgttgtggt  
38581 tacgagaatg ctggcagagc cctgtcatt actttccatc tcgaagcggg aaacaagagc  
38641 catgtcttc acaggtctgt gaggaatctc ggaaagcttt tcctcgttc cggcaatggg  
38701 aatcatctga aggtcagct tttcctcat ctgatcgtag tccatcagcg cccgggtatc  
38761 gaactcggc atgctccag caatctctgc cacctgctt tcaatgtat gaaggccgt  
38821 ctccataggc ataccgtct caacagctt gtaaacatag tccagattca tcgtggcggc  
38881 aacgttactg cctgcagggc tgacagccag tccggtatag gatttccct gcagtttca  
38941 aacggcctga atgcaatat ccagatcggg gaagcgtca cgcattctat cgacaacctg  
39001 aatctaaac tgatcaaaa ccatgtgta gtctcctt tttctttcgc gcagccaata  
39061 accacagatg gtctttcgt cttaccggg aatggtcag aatggctat tcaaaaagat  
39121 cattgcagca agaaagtca tagcggtaag ctctcgcct tcggtttcat cgtcattgac  
39181 tctggcaata taaaccggag ccgtgatggt gatatacct tcgctttcc aagtgtgctc  
39241 catatagtgg agaaacagat ggtcgcgat ctcaacaaa taaaactgt gttcatcatc  
39301 aaagcccggg aactttgaca ggacatctc ttccgtcatt agctgtaccg gcttgccggg  
39361 aaccgcaaaa aggacggtgg catccatata ggccatatca tcctcgtccc agtcatccat  
39421 gtcttcgaaa ttctcgtgt cccagggatt cttctttccc tgaagcaggc tggcaattcg  
39481 ggaaaggaca atggcactgt cacagaacat ttctgccagc tcgtctacag aatctgcaag  
39541 ctcaattgct gcagtctct ttcggaagg cttttccgg ataccaagca ggttctgcat  
39601 ctgattcatc atttctttt cagtattga ttgatactc tttcgtatt tgggtaaaa  
39661 agaaagcact atcaaaaggc ttgcttctga cagtgtcgg ggtatgggta ttaatttatc  
39721 gttctgatc gcgagctttc ttttctgcc actgatccag aagcttgata atggtgtcct  
39781 gcatctgctg tgtggtgtag gacctgggga aatacttct cagtgttca tttcggagg  
39841 tgaccgttc aagatcacct ttctcactt cattcatgat ttctctggca gctccatgg  
39901 tgaatcacc ttctcgcgc agcttctca agcgtgagc ctgggaaaga gaagggaag  
39961 cctgtacttc atccatggcc tgcatgaaga tttctgttc ctccggagca aggtaggaaa  
40021 gctcagccg cggattgaag gaaatctgt tctgatcagc cattccaga agttcgggaa  
40081 tgaggtggt gagacggat tagcgtgga cttgcttct actttacca gttcctgag

40141 ccaattgctc gtccgacctc aacttagggc caagttggcc cgaagttaaa tctgatcgtt  
40201 taccctgatg tttcatcgct tccaacttca ttttgtacgc ataagccctc tcgctgggca  
40261 gaatgttctc tcgctgaaga ttggaatcca ccatgagcac cgtggcggca tcatcatcca  
40321 tctgccttac cagaaccgga acctccgtaa gccctgccag ttcagcagca tgggcacggc  
40381 gatgtccgga gatgatctca taaccacctg cttccagcgg cctggcaatc agaggggtca  
40441 gcactccgta ctgtcgatg ctctccgttg ttcgaagcat ggcttcatca tcgaccacct  
40501 tgaagggatg atccttaaag ggaaccagct cgctgatgct gatattctgc actcgttcca  
40561 actgactctc tgcacggctc tcatccgttt caaagatac atcgtagctg gtcaagctga  
40621 tgtttccgcc tctttcggc attcgctagc acctccttg tcagactccg gtaggcctca  
40681 gcgactttgc cgcccgatc gtgtttgaaa atactcacgc cctccgcgct gatttccgca  
40741 gcacggacgg agcaggggat gtctgcgtcg tagacctca gcttgctgcc gtaggtatcg  
40801 cggatcagcg tactgatctc cttgcaaag ttggtacgaa gatccacat agtcagcaga  
40861 attccttga tccgaagctt gggattgatc tgacgctga ccttgtttac cgtctgaagc  
40921 agctgctcca gacccttgc cgacagatag tttgctgaa caggaatgag gacctgatcc  
40981 gatcgggcaa gcgcattgac ggtcagcatg cccagggagg gcatacagtc cagcagaatg  
41041 tagtctact gaaatttcaa agcatctaaa acctgcctta aaacagtttc gcggctcatg  
41101 gcgttgacca gcgacacctc catacctgac agcgtaatat ttgcaggaac aagatccacg  
41161 ctttcttcat gtgacaggat acctcctta ggtgcgatga gctgatcctg catgacctc  
41221 gccatcaggt cggtcagcgt gaccggaaga tcatccggtc tgggatgtcc aagggaatg  
41281 gttagggacg cctgcggatc cgtgtccacg agcagcactc ttttccctc attggcaagg  
41341 ccaatgccca gattttcgca ggtggtagtt tttccggtc cgcctttctg attacaaca  
41401 gccatgattg tggctctcga cataatgatc acctcctaga tcaagccatt ggccatgtcg  
41461 tgctgtacct agttctgata gtacgaactg atggtagttg gtgcgttgta gaggactgcc  
41521 agcatgtact gcttcatgct ctaacgcgg gttgtgtgt ttgccagtgt catcagggca  
41581 tatttgatat gctctgcatc cagcttcata aatcgacttt ttacgacttc gattggcata  
41641 tttcccggg tgatacgaat ggtcttttg cttgagcagc aaacatcgac catgagatcg  
41701 accatagcct gaatggtatc ctgatcaagt gtcttatccc gggaaagata atccagctcg  
41761 agagattctc tgaataaatc ctactactga gctcggctcc gcacgcttc gcttctttc  
41821 ccgacatttc tgcggaata gaaggaatcg gtatcactat actcagtatt aataatatca  
41881 gtcttatttc cgtgtcctt tgacacttca agagatgtga tttcgacact tctagaagtg  
41941 tcattttgac atttcaagaa atgtctctcc acagggctgt ccaccgatat gaagttctc  
42001 acatagatca ggtttggtt tcccagccc tgacgcttc tctcaatgag accgactttg  
42061 tcctccaaat ccgataaaa ctggatcgct ttttgtttc cgagttcat gtccgcatg  
42121 atttctcaa tcgtcagat gatatacacg cggccctgtt catcgatcca tccgttttc  
42181 gcagagaggg gaacgcggtc cagtaagatt ccgtatagag tcttggttc agcagacaga  
42241 tatttgaacc ggtcattcgt aaaaagcacc ttgggaacct ggtagaaggc aaactgttct  
42301 gcctgggctc catagaaata atcaaacact catagtcacc acctgcttc aggagaattt  
42361 atcgcgcttc agaggctttt tgcgaaacac atccttatcc ttgccatagg ggcattcgtt  
42421 gaactggcac cggcgatact tgaaatccgg gcgatagtag aggcagttag cgcagcttc  
42481 gggtttatgg tccgatcac tcccgggatt ttctctctt gcagccctcg ccagcttctc  
42541 atatctcgg aagacctcat ctttctact catttgccgc accttctcc tttgcggtt  
42601 tagcgcggat tgctctgagc catgcgtcca attccttga gcagacagcg ctgacacagg  
42661 gatggccttt ggcgtaacag cagccctcac atttctttc ctgctcggtc tttactgct  
42721 cagccaggtg gtagcagttc tgcgtaccaa gcacacagcc gaccttgca ttctccaga

42781 agaagcactt gcggcaggta tccggcttgt catcatagta tctgatcccg tcgatcagaa  
42841 tggttttgcg tttcactttt tttctcatca cgatatacctc catagttttg atccgccc  
42901 ggggaagtcc ggagacgaca aaagccccgc agtgattttc atcaccacgg ggctatgtaa  
42961 gatatacgtt ctatactgaa tgttgggggtg tgctgaaaag cacacttcca acattctttt  
43021 cgttgtaata aaatacatct ataagaagcc tcctaaacgc attatcccga ccaaagtta  
43081 atgttacgga ggtgaccctt tatagatgta ccctaattat accaaggctt tccttaactt  
43141 ggaaggtgtt tctattaata aagtgggtca ggcagactct ttcattaata ttttcatcca  
43201 gtccaaccg gtagaacaga cttgtccctg ctgtggggct aaaacaaaac ggattcatga  
43261 ttaccgttta caagaagtcc aggacattcc cttactggga aaacaagtaa tcctgcttct  
43321 tcgcaaacgc cgctacctct gccatactg ccgcaaacgg ttcacggaac cctattcgtt  
43381 cctcccagc taccaccgca ggaccgcag gctggcattt tacattgtct cctgctccg  
43441 gcagacctt tcctaaac agatcgaga gcttaccggg gttccgctc agacggctg  
43501 ccgcttctg gacacgattt gctatctcc gcctgaccag cttcacaag cgctttccat  
43561 tgacgaattc aaaggcaatg cttctaccgg taaatatcag tgcattctgg ttgatccgaa  
43621 aaagcggcg atcctcgaca tttcccaga tcggaccag agccatctgg ctgattattg  
43681 gcggaacatt cccaggaaag aacgcctgaa ggtaaagtcc ttcgtctcg atatgtggc  
43741 cccctacacc gaactgcac aaaccttct tccaaacgct acaatcatc tggataaata  
43801 tcatttcatc cggcaggtga catgggcaat tgaaaatgta cgcaaacggc tgcagcgtc  
43861 catgccggtt tctctgcgta agtattataa acgacggcgg aaactcattc tgaccgcta  
43921 caaaaagctg aaggatgaga acaaacaggc ctgtgattta atgcttact atagcgagga  
43981 tctgcgtctg gcacaccgca tgaaagatg gttctatgat atctgccaga tggaagcgta  
44041 tcgtcagcag cagagggaat ttgatgactg gattgcgaat gcacagagct gtgggatcaa  
44101 ggaattgag gcctgtgcta agacctacag ggctggcga aaagaaatcc tgaatgcctt  
44161 taaatacggg ctgacaaatg gtcccacaga aggatttaac aacaagataa aggtattaaa  
44221 acggagcagc tacggaatcc ggaatttcaa acggttccga acccgatac ttcactgtac  
44281 atcataggat aaaaaggtcg gtaatgcgga ggcttattg gcatgccaaa atcagtaaaa  
44341 cctggaacta aacataaaaa gggccctttt catagaattg gggcgggatt ttaacaaatc  
44401 ccacccaac tattgacaaa gagccaagat atcgatattt agttgttcag gagaatgaaa  
44461 aactgaaatt tatcgggtga attttcaag ttcattgctg atttcttcag catgtttaat  
44521 ctgttcattt aagttccatt ttcaatatt tttccatct ctgagaaaca tagaaccaca  
44581 ttgatggaaa taaaattcaa tgtttcgtc tttggcttct aatacaaat ctctacca  
44641 ctacacatt ataggtctga catctgcttt gggtgccatt tcaccgcta cattaacaca  
44701 cttgattaaa cctgtatcca gatacttcc aagagatata ggagcaatta acggtgagca  
44761 aaagacttca cgggttttta ggggagcatc aagaaaataa ggcaatcgta tatctgccat  
44821 tctttgattt tcgatggata tactcaaatg gaaatgctcc cagccttcc cccaatccgc  
44881 aggaacgcac tcttaattc tctcaggcct tttgttgtt gtaacaaaa tacaatcctt  
44941 tcttctctg atgaaatccc agcagccgtc tctcattca tctgcttctt cgataaagaa  
45001 atcagaagaa aaacacagtt taacaagaga gcccgcgga cagtccttat ccttcagctc  
45061 ataggtagtc tttccctgg taataatcgt agtatcagca ccgtatcttt tgtccatttt  
45121 ataacaaag caatttttg atccggggct tacctttta cagccatgcc acggattcca  
45181 tggaatcgt ttttcaatct gtgtgtttg cataatgta cctccgcaa ttccgattc  
45241 ctgcttctc taatcccggc ggttgatttt agaaatctaa aatttcgcca cctgatttc  
45301 taacgcctt agaaatccg cctccggtct tttcttctg catagcagtt ctgggtatca  
45361 tatttcagat ttctgaggcg ataggggat ttatcacaga ttacacca gataccgg

45421 tgaacacgca aacacgcgtc attttagcg gaatcaccag ttcaggtcgt ttttctcat  
45481 tagataaaag cctgtttt ttagcacttt atcaacgaag cctctttt attagaagaa  
45541 acgcggaaga tttcgtgaaa aatcttccgc gatagtgcgc tggcgtccct gactggattc  
45601 gaaccagcgg cttccgctt aggagtagac ccgatacgat gaaaccaagt gcaacacagt  
45661 gcaagaaaat cttggaaat acaaggttt tctctgttc aaatcctatc tggattacg  
45721 cttcataagc atttcatag ggattttaca ccgtccaatt ggctcgaat tagcaaggct  
45781 ttcgatttc ggtggacgtt gcaagtgcaa gcaaattcct ctatgtaact tctcgtgata  
45841 cgaaatgata ggaaatccta ttcattctcg tgcggaggcg ctgatgtct tagacacat  
45901 ctagtctgt ttaatatatc attcaaaat agattttca accagcatta ttaagaattt  
45961 caaaggttt ttcagactca atgattctat gtaattaga cccgccgaag caggttttt  
46021 tttattcag cataatctct ctatcctcag cgccgagcat ataagcacc ttggcaaaag  
46081 catccctgc cagaagctct gctacatcaa ccctatcgaa cagcatccat atttcttct  
46141 tttcggagt cagttcatgg ctatggtaa acaaatgctc aagtccaat cttcaagca  
46201 atgccgactt tctgctttg tttcctcag ctctgccaac atattcgtc ttccttct  
46261 tggaaaatgc ctgatattg tcaactctca gatgctcgt atactcgtcc ataaagattc  
46321 tatccatact cgttgacctc cataacaaaa aaataagggc agacccttt acagctattg  
46381 tagctatgta aaaggatctg cccttgagct tactataatg ttttgccag cgacttcagg  
46441 agtgcgtcca tttccgatt tgcagaagc ttcagaagaa gttcttctc atcagcgtag  
46501 tttccgctg cggctggtg aaccggctca ggcgttgct gtctgcctga gtagaacgca  
46561 gctccattc tttcagcgtt cagtctcgg tcatcgtcga tgatatggga gtaaacatcc  
46621 gctaccatct tgacctgtc atgaccggaa tgccttgaa cggatttcat atgccgccc  
46681 ttcagcttca gcttgtaagt gatactggaa tctcggagac tatggaaaac cacttccggc  
46741 agtccctct cctcaatcag cttattgaaa gcacggttga taacctgcc ctcaatcggc  
46801 ttgccattg aagaacagaa aaccagattg aagtctacga actcgtcacc gaaaaggtc  
46861 ttcagttct cgatgtcagc cttcgtct accaacattt ccgctacgg tttcggtaag  
46921 aacacctgc ggacactgt tttggttca ggagtttga gaaccaatgc ggtatgcgta  
46981 ctggcgaagg tggcgggaa cttgaacatg atgtcctac cgtccagatc tgccatcgt  
47041 tcacgattha ctctcgtcaa ctcttttca acgaagatgc ttgctgacc aagttaata  
47101 ctggtagagg aatgtcaat acagtccag gtaagccca gaagctcgc cattcgcagg  
47161 gaacaggaga aggcaaggtt aatagccaga cgaagaatat catcgtcaca ggctccaga  
47221 gccttctgga gcacttctc tgtccagatg tccctggtct tgtgttctt tttcggcagc  
47281 gtagcgtgct ccacagggtt tctggtcctc aattccact tgaccgctg attgaaagca  
47341 tttcgaatg tcttgtaac ctctcggaca gtatgcggag tcagatattc tgtacgggct  
47401 tttacatact tagaagaaac cgcttgaca gaaagcaaat ctggttaata cttgtccatg  
47461 attcctggcg tgacatcctc cagcttata tcaccgatga ggggacgaat atagtttga  
47521 atcaggctct tctgcttct atagtagac atgccccagg tttcacacc atagattgac  
47581 atatactcat ccaaaagatc attgacggtt ttagcagaag ggggaataaa ggttccggac  
47641 tctgctcat attcaactg caacttctt tctttgctt cggcattcgt ttcaaaggtt  
47701 tcccacttct gacgttgtt gccgttctc tgggtgatg tataaaccac agaatactc  
47761 tttttctct taacgataga tgcatgtaa tcagctcctt tctgtctat cttccgctaa  
47821 ctggtagcgg gtctgattg gataaccatt ttcaaagctt tctttgtag ctgcttata  
47881 cctccaacc ttgataagct caaatcttc attggcaacg atatagtaaa tggctgacg  
47941 atgtaccca agcattctg ccatttccg caggccgtg gtggatgcca taatatctg  
48001 atccagttc tgatcctca ccgtgcggtc atcggttga gaagcatacc atcttcaaa

48061 gctctccttt gtcactctgc gcttgcccag gacatcgacc acatcaaaat gccctttggc  
48121 aaccagttcg taagcagtcg cttctttcag cccaaggcgc tgtccaagct cctccattga  
48181 atatgtagtt ttcttcagtt cctcgccggg aggggttcca tcgaccttct ggtatttgaa  
48241 ctgattggca taccattctt caaagctgtc gatcatcacc ctcatggtgt tgccgacaag  
48301 aatggttttg aagtaattct tcttaatgag ccagtatgac tccgttttac caagaccgag  
48361 catcctgccc atttccggaa cagacatact cgtgcgtttt ctatttccg ccatcgtaca  
48421 acctcctatg taaaaaatgt agccatgtgt ttcttgcac ggctacattt tatcgaactc  
48481 tcaatatggt ttgaagttg tcgccgggtt gtacgacacc cttgacaaat cttacattg  
48541 atgatccaac cactcatcaa aactctttt ggagattctg atactgccac cgatgcggac  
48601 gctatggaag actttctttt tcacaagggt gtatgcgctg gttctgctga tgcccagaat  
48661 atcctgaatc tcatcaaccg tataggttct cttatcaaac tgaactgctg tagcagccat  
48721 cgcttcttcg gtgcgctgat tcatgacagc gattctttct tcaaacattt atgttcaact  
48781 cttcgtctc tttgctttat gtttgggga acgcttttc agctgttcca ttgccaggct  
48841 aacggataag gatttctcaa tcgctacat ttcacggggc gttaccttac ctaagtaatt  
48901 atcaatcctg cttttatcaa tggtagcaat ctgttccagc tgaacaacgg acgcttcttt  
48961 gaatgcagga ttgtcgtaaa taacaaagt cgtcggcata ttgctttct tatagattct  
49021 ggtggtgacc gttgccacaa tcaatgtggg agcgtgttta ttaccggtat cgttctgaat  
49081 gacgataacc ggacggatgc cgccttgctc cgaccaact accgggtcca gattggcga  
49141 ataaatatca ccacggcgat ataccaatt ttctttcatc atgtgccatg acctccttc  
49201 gttgggtatg taataactga ctgccagaaa ggaatcaggc agtcagtcca aaagtctatg  
49261 tgtcccatat ttgccacgca cccctgggaa agagggtta cgcctcagg gaatcaccga  
49321 acgactgatt gcgaatcagt tcatagggaa tctaactct gccgggttct ccgccagctc  
49381 cgtagagaag tatctttaat cctgttgctt tcatggcctg attgggagca acccaatatt  
49441 tacaagccag tattgatcgc tggcatcggg agagagacaa gcgcttaatt tatagaagaa  
49501 agtcgttctg tttctctgtc cgatacgtct cggcgtaccg ctgatgtggc tgatgctctc  
49561 gcaccggcaa caggaacgta ttcgatgact gtgtattcag tttcaagga tcaagcagcc  
49621 gattttcttt ggctgtatct aattgtacc tgttctcat gccagtttt attgctcgt  
49681 aggtatagtt ttgaggttat tcacgacctt aaaatatgta atcaagggtt gtttcaaagc  
49741 gcacaaccaa ttcgattgcc aatcaatag agatacctct gttgccggtt tcaattcgtg  
49801 caatggtggt tgccgcaaca cctaactgct ccgcaagctg ttctgtgta agccatggt  
49861 cttttctcaa ggctttaatt cttttccgc ttcaaccaa gtcgtaatac attttcgtt  
49921 ctccgtgttc ttgaattgt gaagttgcaa aatcaaaaac agaggagga gatcgtgcc  
49981 gattcgaat gctctttgcc atctgcctgt ctccttgca ggcataaaaa aagagccgga  
50041 gtaaattact ccaagctctc gttcatgctt ttgtgttaa atgaaggaag ataggcaggt  
50101 ataaaaaag cccgtacc attacagga cgaggcgtaa ctctctat tcaattttat  
50161 gctactatct ccagcatag cattttaac accggacaag tcggacttc agtaggaaaa  
50221 ccgtcgtatt tcatcggat ttagtcgga ctaaaatct gtcttagcac tcacaatac  
50281 acaaggcttc ttctccctg gcactttcca ggaaatctt caatttagga atggctgttc  
50341 cccaaagtga cagacaaat aacagtatcg cttctttct tcgatcataa tagctgctgc  
50401 gttccatatt cagaacctc agcatttctg attcctgta ctgaagcgg ttgagatag  
50461 ctttgagat aatctcacag tacagagcgc cttatccgg atattctctg atttcaaca  
50521 tagccatatt taccagctca atgatccact ttgtctgaa taagctcga atacgttctt  
50581 caaatcgttc tcttgctca tccggagcaa agttctccag ataaatcaat gcaccatca  
50641 agctgcacc gtaagtacaa ataagggtat cacatacatc attcgcacga tcaatgtag

50701 accagcacac ctctcgatat atggataaaa tcagcttcgc tctttcatac agaaccttct  
50761 cgtcaatggt tgcatccgg caaagcattc gaatttgct taatacctgt gtattatc  
50821 tgctcattca gaattcctt tcagcctaata ccataaaata agaattcctt tctaactcct  
50881 gtcacttggc taaagggaaa caaatccat gggacaagaa tgactataac ttccgatatt  
50941 tgattaaaat aacagaagtg aaatcggaag ttcttgactt tataaaagtt ccgatata  
51001 attaaatgga actaaaactt ctgttctgat tctcattata acattttcca gaagtttgc  
51061 aacaaataat cggagttac gaataaatat ttttgaaag gaaggacagt accatgacat  
51121 ttggagaaaa aattaaagaa gctcgtttgg ctatgaacct atctcaaagc gagcttggcc  
51181 agatgaccgg ctttccgaa agatcccttt acacctatga gcagctcgga aactccca  
51241 gaaaaagcaa catcagaaaa cttgctgaag cgctgcatat ctctgtgtcc tatcttttg  
51301 acgaatctga aacagacagc cagagccata tagatcagga tatgtttatt ttagaagcaa  
51361 aggaaaactt cggttcaaag ggagcaaaag aagctcagga agtgctgggg cgtgtaaatt  
51421 ctctgtttgc cgggtggagaa ttggacgagg acgcaaaaga tgtattctc caggcgatta  
51481 tgtcagttta tatggactct aagaaaacag cacgggaaaa gtacactccg aagaaataca  
51541 gaaagcataa agataaagag taaaatcctc aagcacagaa tatgtttct gtgtgagatt  
51601 cggaggtgaa gcaaatgaaa acggcagagc atatcattga aactgtcgat aagcttgtgc  
51661 gaaaatatca caccagagac cttacgagt tgtgtcagct gttaggtatc aaaatccatt  
51721 attacgattt acagaagaaa tgaagggct tcttctatta ccagtcaga cagaagaata  
51781 tcgtgataga tcacaatgtg aacggtatcc tggaaactat cttagtcgca catgaattag  
51841 gacacgctgt cctgcatacg aaaatcgcca tgatgcacgg cttcaagaa atggaagtgt  
51901 ttgatgatag atcaatcgaa gaaaacgaag caaacttctt tgcggcagag cttctgttag  
51961 aagatgagga ggttctggaa tgccttccg aacacacatt tttgaaact gctaaaatgc  
52021 tctatgtacc ggcagcatta ttagattaca aattcagcct gctccatgaa aaaggggagc  
52081 ttgtaaattc gatgtatatt cgtaaagcag atttctgaa gggagatctt cacgcctacg  
52141 ataatgacat tggctatggc gatatatgaa tatctatctt tataatctta caaaaaagtc  
52201 caccagtacg atgctcagtg catcatgact ggtggacttt ttagttatca tcaagaaatt  
52261 gttcagatca agcaaaaata tcatgtccgc caacaggcag aagcacaagg cgcttatctt  
52321 agatattccg caaagaacgc tttcagcttt tcaaacggaa tgatgtccat ctgatcgtaa  
52381 aggtcagtg gatttgcacc ggggataatg agcaattcct tttatcgcg ggtcagcttg  
52441 ctgtacgctg tttcgtgaa atagcgggag tgcgccttt cccgtgtac cagcagcacg  
52501 gcagagcgga tttcgtgct gtattgcaag atcggcatat ttaggaacga tagcagaggag  
52561 gtcacattcc aaccgccgtt ggagttcaga ctacgggggt gatagccacg tggcgtttg  
52621 tagtaagcgt aatagtcctt cacaactgc ggagcatcct ccggtagtgg atcgacaaca  
52681 ccgctgcca atgcataagt accactcctg taatcttccg tgcgctgtgc atcatggct  
52741 ttttcttct caaagcgtgc ctgctcagaa tctcactgt caaaatagcc gttggcgttc  
52801 acacgggtca tgtcgtacat ggtcatagca gcggtcgtt tgatacagat gcaatggct  
52861 gcggcattga tcgcatgac gcccaaccg caaataaccg tgataccgat gtgctccgga  
52921 tcaacattct cctgtacgga gaggaagtct accgctgcgc agaaatcctc ggtgttgatg  
52981 tccggcgaag cgacatagcg ggggtaccg ccgctctcgc cgggttagga cgggtcgaag  
53041 gcaatcgtca agaagccaag ctccgccatt ttctgtgat acagaccgga ggactgctcc  
53101 tttaccgcac caaacggacc gctgacggca atggcgggca acttgcctc tgtgcccttc  
53161 ggcgtgtaca tatccgtgc caatgtgat ccatagcggg tgtgaaaggt tactttctg  
53221 tgatcaacct tgtcactttt cgggaacacc ttatccatt cctgtgttaa attcagttt  
53281 tccatattca gacctcctg cctgttgct taaaatatac tgtgtgtcc acggcttcca

53341 accattcatt ggaggtttcg tcccctggaa cctctaccgc cagatgagag aaccagctgt  
53401 ccggcgcagc accgtgccag tgcttgacct cggtcggaat gtttaccaca tcgccggggc  
53461 acagctcctg tgccggttg cccattcct gatagtaacc tcgaccggcc acacaaacga  
53521 ggatctgtcc gccaccgttt ttggcgtgat gaatgtgcca gttgtgagg catccgggtt  
53581 caaaggtcac attgtaaag cgcacctgct gcgtagaaag aggtgagaga tagctttggc  
53641 caataaaata tttcgcaaag tcatcattgg gtgcgccgat gggaaagacc atttcattct  
53701 gatgcttggc ttttgcgtcg gcagcatcgt cctccgccca tacctcctt gccatacga  
53761 aggccgccca cgccttaggc cagcccgc ataaatgccgc atgggtcagg atctccgaa  
53821 tttccgtttt ggtcacaccg ttgttcttg cagttgtcag gtggtactga aaggacgaat  
53881 ccgtcagtcc ctgcgccatc agcggccacca ctgttacaat gctgcggtct cgcagagaaa  
53941 gcttgtctc tcagctccac acctgtcaa acagcacatc atcattcaat tctgcaaatt  
54001 taggagcaaa tcccccaaa gcctctctgc ctgccgttg ttaactgcc atggctaca  
54061 cctccttggc catctgatag gcttgcctca gtacagcatg acctgcgatt tctcccacgc  
54121 tgtttacgcc gcctgcaaac actgtgccag ccagcgaca gcgggggaag cagtctacc  
54181 agccctgcac ggctttctct gtaccgcaa aggtttccgg tgcgtcctc gccgccgtg  
54241 caagcagata ggctttcgtg aagacgtagt ccgatcga caatgggtg gcacgatcca  
54301 gcatagtctt gagctgaccg ctgacgcagt aatagtagac ggggtgtgag aacaccagca  
54361 cattggcatc atgcatttg gcggcaattt ctacggcatc gtcttggatg acgcagtgc  
54421 ccaactcag gcaggcaaga cagccctgc agaagccaac ctgcttttct cgcagataca  
54481 cagtttctac ctgatggccc gcctcccgtg cgccttggc aaacgcttc gccagcgtt  
54541 cggagttgcc gcccttacgg ggacttgagg aatgattag tacctttta tcatcgtag  
54601 aacactcctt gcattttat attcttttg ttattctcat agtagcacct aacctaact  
54661 ttaggtcaag atatttttg aaaattttg gaggaaaatt tatgtattca attggacagg  
54721 tggcagagat gttcggattg cccatctcta cgtgcgcta ttatgataaa cagggactt  
54781 tccgaacat ggaacgggtg tccggcatcc gcaagtttag tgaggcggag attgaagcgc  
54841 tccgggtcat tgaatgtctg aaaaaggctg gcatggagat taaggatatt cggcagtta  
54901 tggattggtg cgtagaagga cggccacct accgcagcg aaaggcaatg tttgaggcgc  
54961 aacgggtgca catggaagca gagctgagc agatgaaccg gacgctggat atgctgaaat  
55021 tcaaatgctg gtactatgag caggcaatca aagacggcag tgaggacaga ctaaagtcac  
55081 tgattcctga ccgcttccg gaggaaatcc gaaaaacata tgaaaatgcg catcgctaaa  
55141 ttcaatgatt tcaactggct gtacgtccc agtgctacca aagtcaaaa agagcccaca  
55201 agggagtgtc gcaaaataac tgattagtca gttatagagc gaggtcccc gtggactct  
55261 ttagcgttta gtcaaataga tcatcgtcc ggaaggtaaa aatcatctc cgtacattt  
55321 ctgataatat gttttgttt ctccatcggc aaaggacat ttcctctgc aaagtattct  
55381 ttctttacga cttcaactac tgcttctgta ttatcttac cagcaggaac aagcacaana  
55441 tcgccacct caatggtatc gtatccgaa atagtagt agctcttga tccatctca  
55501 aactctacac tgcaatagat aatcattg tcacagcgc gtaccttcc atacacagac  
55561 gggttcataa tttacccca ccatagaaa gacataaatt caaagacga ctccataaac  
55621 tccgccaat cgtccggaag cccctttta tcgtaggtc cttgaatgag ctttctattg  
55681 ccttttgag aataacctt aatgggtgag tctatggtt caagcgggtc aaccactaca  
55741 ttctccgggt ttcttctat atggtaaac atgcttcta catccatc ttcaagaagg  
55801 cttcaacc cgcctcaac tttgatttt ctgcttacag aacaccaga accgatattc  
55861 tgaatgtgt caactctc gctctcta tccacaatta aagactctg ataatccag  
55921 acagcgtatt ctgcgtgtc tgaagtagga acttttggtg tgatcttct gatacagta

55981 tagtttactt cgattcgatt cacatatca ggcttattat tccatcaaaa ggcatacaaa  
56041 tcaggcattt tcaagctgtc acgcagcaga tctgacaggt caattccgtc cacttcaaaa  
56101 gacgagcata acgaaccgct gaacttatag acctttcctg cggatttggc cagctccata  
56161 ttccagtttc caatatcagt tgcaaaaact tcatcgtacc cattgctgaa atactctgta  
56221 aacgcagaaa tgattctggc ggcaaccgct ttatcaattt tcagattctg actgtgggct  
56281 ttttctatc gaccatctct gcgctgtccg aaaacatacg aagaaaacca tacttctcct  
56341 tctgattga gggttatgtg ctgttcaact tcttctcctg gttccgggca aggccataa  
56401 ccaagccgat tggaaacaag ccgaatctt ctaagttctc cttgaacag gaagggattc  
56461 tcgccggaaa gcagggcaag gcggtcaat gccagaataa accatgaacg attttcagt  
56521 ttcaagatgg ctgctgcatc gtatgcccaa tgattaaat atcgccattg ggaatagatt  
56581 gccgaccaa gcagtttaat gtccgtgacc tcgtcaatga tacgatttag cgtatcaaa  
56641 ctgcttctg catgccata ttttctgaa aaggcatggc cgcaatccat ctggaatccc  
56701 aatgctgac aatcatcagc caagtaatgg tcaaccagct ctatgtagct gattttctga  
56761 tctctaaatt tctcaatcta cttgtggcg aataagtga cttgctctaa atactccatt  
56821 gcgacctct tccgaatcgg attaaaactc ctccaagtc cgaccttca gatcatttgc  
56881 gattacatcg gtgttaggca ttgtttata tccgaacata tcagcaagat tgaagaactt  
56941 gctttttga atcggttct tactgcttt tctaaagtcc atcggttaga acttttcaac  
57001 gatgaaat atctaggtaa tcgtccgaag gttatagcca taattatctg cacggcggat  
57061 tgctctgtg atcggttcaa tctcatctgt ggtaggttcg gctccgctt cggcacgata  
57121 agtcatgctg ccgttattt caactcgat gatggtctt ttcagttac caatggcacg  
57181 gatactctg tcttataca agccgatata tccatgtcc gagaactgc gggattcctg  
57241 gtcatagaac aatccaaat ccatattgct ctgaaaagt gtaccggcta cgattgctt  
57301 catccattt tagccatccg gtatcagctt ttatcaaag caatacttct tgaatcgtc  
57361 taaaacggcg atgattccg tatctctgtc gtcaacaata tctccatag cgtccacaag  
57421 ctgctcgaag gtcaagtga cgtgctgat cggatggata agccgggtg cattttcgt  
57481 gttatactt tttagttcaa tcgctaatt atcaaacagt tgcggttca tcggcttggg  
57541 gtcaaggtg agcaaaactt ttatatctc agcgcaaac tgctccagat gattacaag  
57601 ctgctgctt taaaactgat ttagagctt tgtttccacc actattttga agctttttg  
57661 gctgataact gcacttgaa cactatcgtc accaacgacc tgcaaatcaa agtgatttc  
57721 cgggcttca tctctcaa gaataaggct gttcagcatg gaaaagaact tatcagcgtt  
57781 atagtatac aaacgagaga gcacagcat ggtgtttgag gtatccacat tcttttggg  
57841 gtggtatct tgaataaat gtatctgat atgcacctc ctaaaacca tctgccggtt  
57901 cgtttgcgt accgggtcag ttgataactc aattccagca agggcttgat ttatctgcc  
57961 gagactgtac catcgagaag aatgctgat caattctt tttcatgtg ataggcgggg  
58021 aagaatcct cttcatac agtgaacct atcatcatc gatcgactt gatgttcagg  
58081 acatgaccg tttatctc tgcaatccc agctttctg cattgattc aactaccaac  
58141 gcaaacact tttgttatt cttatggcg aaaacgcaat tccagtcatt ccacgggtaa  
58201 tccggttctg cgccatagat ttctttgccc cattcaata gttctttc tccatcgtt  
58261 tccatccca tatgataagg cgataacca tagattaggc ttccatcacg ttatctgtc  
58321 aaagctcga ctgtgtcatt acagtctgaa cagcatcatc catacctcc ggcggatatt  
58381 tatgttctt caacagctg ttaatgagag tacgatttt ggcacgggca gactctttac  
58441 gctgccagtc aatcgttta ttctgcaa gtgtatctgc caattcttt gtaatcgtc  
58501 tcagttctt atttcgtaa aatccttga ttgcttgcgg ttcgtaagt gcacgtaga  
58561 atgcaactc atcagctga aggcggagct gttccctc tttgtgggct tctgccagct



58621 gttttgag tttcagcatt tctgcaatga cttcttcatt ggtgagcata ccattcagat  
58681 atgctgtgat agctcgtgc atgatctgc tgaactttc ggacttaacc acattcgttc  
58741 tacggtaa atgatactgt tccgctatca gtttttcag cagctcgatt gccaggttct  
58801 tctcttcat ttactgatt tctcaagga acttcggatc aaacaagaa aattctctt  
58861 gcatacaga gaacaggta ataacacct cgctcttgat gctctgctc aaaagctcat  
58921 tgatacagc gttcattca ggcagagaga tcttctacc ggtcccgca ttggtcagcc  
58981 gcagcaccag gacacgacc gactcaaaga acgagcttc aaagcgatca gttcacaca  
59041 ccagagaaga acaagagaa agagcctgat gaagcatgag ggcttccctg ataaaggtg  
59101 cttttcttc ttcttttca cggcgatga tatagttac cgcaccgctg atggtcttg  
59161 ctctttccag atcggttccg gtagtgaact tgggtgaatc aatccatgg aacatatcac  
59221 ggcagacacc gagcttttcg ataaacttcg gataagcagc ttggcaacg tccgtatcac  
59281 catagttttt cttatcacgg gtagttagt cattcattgc ctgtttaat gcgtagcaa  
59341 tgcctacata gtcaacgacc agaccgctt cttgtcacg gaacacacga tgacacggg  
59401 cgattgctg catcagatta tatccgctca tcggcttata cacatacata gtagccaggg  
59461 acggaacatc aatccggtc aaccacatat caacgacgat ggcaatctc atcgggctgt  
59521 tgtgtcctt gaatttttc gccaaactcgt cttgtgtcg cttattgccg ataatacat  
59581 gccattctc agggctgta tttccgctg tcatacaat accgacttt tccgtccagt  
59641 cagggcgag ctccagaatc cgcttataga tcttcattgc aatcgggagg gaatacgcca  
59701 cgatcatcgc ttgcctgta agcagacct cacgtaatt ctcgtaatg tcaagaatat  
59761 cgctgaccag agagttgat gtattatcgt tgccaatac ggcttccatc tgcagagag  
59821 tttctgtct ttttcaata acctccgat cagcattatg tgccatgatt tcatactctg  
59881 tatcaatcat gtgcagcga gcttcatcca ggttgagctt aatgacacgg ctttctaat  
59941 agaccggagc ggttgccca tcttcagac cctgcgtcat atcataaatg tcaatgta  
60001 caccgaacac ctacgggtg ctgcggtctc tcgaggaaat cggagttccg gtaaagcaa  
60061 tgtatgtagc gtaggcaag ctgttcgga taatgcgggc agtaccaca acacgcttg  
60121 cgatttctc gccgtctca tcttggtca tcttaatct ttcggttaag ccatactgtc  
60181 caggtgggc ttcgtctgc ataacgatga ttttctgcg ttcagaaagg gctcgtgag  
60241 attcctaaa ctctgcatg gtcgtaaaga taatacgtt tgctgacga ccggcaagga  
60301 gatcacgag atttcacga ctctgagcgt gcatcgggtc ttgacgcaag aatccttgc  
60361 actttgcaa ctgtccgaaa agctgatcgt ccaggtcgtt tctgtcgtc agcacaaca  
60421 tcgtgggct atccaaggct tctgaagca gatgggcata gaataccatt gacagcatt  
60481 taccgtgcc ttgcgtatg cagaacacac caccctacc atctgtaacg gtagctcgtt  
60541 tggctgattc gattgcctt cttacggcaa aatactgatg ataaccagcc agtatttga  
60601 aggagttcac acctcgttg gaaaagcaga taaagtctt tatcaggta agcagtcgtt  
60661 cttctggaa cataacctca aagaaggtat caaactgct gtagctgta tctcgtagc  
60721 ttcatcgac cgtttccat tccatgaagc gatctcacc ggaagtaatt gtaccggtt  
60781 tggatgcat ctggtcactc ataacgcaga tggcattata gatgaacata gaaggattt  
60841 cttcatgta gttgcggagc tgccggtatg ccgagaagc atctgttct tctcgtgat  
60901 gtgattcag ttctacaata acaaccgga taccattcag gaaaagcaga atatccggg  
60961 gttgtgtgct gtttcgatg aaagtccatt gattgtctac gataaaggag ttgtgtcag  
61021 gattctgta atcaacaaga tagacgatg aggagcgtc ctcgccttc tcaaatagc  
61081 gcacaggaat accttttgc aggtagtcca taaaacagc gttttctgc accaactcgc  
61141 cgttttcaa gttctcagc ttaaaaagt catcactaat agcgtctcc ggcagagaac  
61201 gtttcaaacg atataggga gcaacaagtt cttctcata cagaggattg cggaatccc

61261 tctctatgtc gggccatac aggtaactgt accccatggt ccggaataat tcgattacgg  
61321 agttttcata gtccgcttcg gtatataatc ctggcataat atcgctcctt ttctgtggta  
61381 ttcatactcc atttttatat catagcattt tctttatata ttaggtcgct ttgccggcga  
61441 cgatttccgg gtaaacgaaa atttagcggc ttaaagtca aggctggaaa catccagttc  
61501 tccagacatc aaccgaggta gcaaagtatc acgagtggcg gcaagtctat cattttcagc  
61561 acgaagattg cgaatctgcg caaaaatcgg ttgtacgatt gagttgaaag cactcaattc  
61621 cgcttccgat ggtatgacga cagacacttt gttcagattg ccttggctaa tctttggctg  
61681 aacggctcca gtaacaattg actggacatt ggttaaactg aacagcaaat aaagcgtttc  
61741 gacagtaaag ccattcttac ccgtgataat gtgggcatga ttgttccacc agaactttcc  
61801 ttccacatat tgcagaattg gaaaaccctt gctgtctaca acagtccat cttaccaag  
61861 gagtagatag attccgcaaa agagatacct atccacatag tccattactg atgtagcacc  
61921 atagtacgga taaatctttg cgaggttggc acgttcacgg ctcgaaaagg gtacgcgttt  
61981 tgaatcgtgt agttctatga tttctgaaac tgtgccaagt cgccaatccg ggggcatctc  
62041 accatcgaag ggtttcaaat caacaaaacg atccttataa agagcctgtg cctgctgaag  
62101 taaattttcg tttatcgcatt tttttattg tttttggca tcaatcgtg agcataggtt  
62161 tgtaatttt cttgtctct caatgcttgg gaaagagaag ggcatctct taaaatcttt  
62221 caatacaatt cttggtatcg cagagcctga accgtaatta tcacgaacat ctttcctac  
62281 ggctggcgat tttaatgtat agtataagaa ttcgggcgtt atcattctgc aatcagcct  
62341 caatattgct attgaagata ataatgccgg gcgttcatct tgcttataaa tgataatc  
62401 ttcaaaatat ctgccccgt ctttctac caaaatatca ttttctctg ggacacacc  
62461 ttgattccga agttttcat aatcttctc gccaatctgt ttgcaattg agaagtcaaa  
62521 accaaattcg gtaaaatctt taacagaagc catataatgc cttgttcta cacttttagg  
62581 gctattatgt gctccgtag tcacaacggc acacacatca tctatcgttg ctgtaatcca  
62641 attagattc atagccaatc gccccagct tcttacggat ttctgcttcg agttcatggg  
62701 acttgcaaaa catattagaa agctccgaag tcaggcgagc catttttca tcaaacggtt  
62761 cgctatcttc ttctgttct tcaatgcaa catagcgccc aggagtcaga atgtagtct  
62821 gcttttcgat agtctgcaaa tcggctactg cacaaaatcc cttcacattt tccaaggtc  
62881 cgttctggaa tgcttcaaag gtgtccgcca gtttctgaat atcttcatca gtgaagtctc  
62941 tgtgtttgag gtcaacctg tagccatct tgcgggcatc aataaacagc gttttgcctt  
63001 tctgctttt gtcttctgta atgaaccaga gtgtaactgg aatcgtcacg ctgtaaaaca  
63061 gctgcgtagg cagggcaact atacctcca ccagatcggc attgataata ttctttctaa  
63121 tctcacctc gccggaggac tgcgtagaca gtgcgccatt tgcaagcacc agaccaatc  
63181 tgccgttcgg tgcaaggtgg tggatcatgt gctgaatcca tgcgtagttg gcattgccgg  
63241 caggcggcgt tccgtactc caacggacat cgtccagcag tttatcctgt cccagttgg  
63301 acagattgaa aggcggattt gccataatga aatctgcacg aaggtagca tgaaggatc  
63361 taaagaactg gtcagcctga tacgggccga aatctgcacg aatgccacga atcgccat  
63421 tcatctttgc catcttccag gtatccgat tggattctg accataaacg gaaatgctc  
63481 gacgattgcc gctgtgtgcc tggatgaact tcacgctctg acaaacata ccaccggaac  
63541 cacagcaagg gtcgtacacc cggcagttgt tgaacggctt caggattgca acgattgtct  
63601 taacgatgct ggacggtgta tagaactcgc cgccctcac accttcgtaa gctgcaaact  
63661 gtgcgatgca atactcgtaa gttctgccca gaagatctt gccttctct gtatcagaca  
63721 tatccatatt ggtgaacaga tcgacgacat cgcccagaac tcgcttctc aagtccgggc  
63781 ttgcgtaatt cttcggaagc acattttca aagattgtt ctctgctca atctctcga  
63841 ttgcttcatc aagaactgtg ccgatttccg gagtgtgagc cgagctgca acggtagacc

63901 atcttgcttt ctccgggaca aagaaaatat tctcgcctaa atactcgtca cgatcttctt  
63961 caaagccttc gccttctgcg acaagctcgt tatattttct ttcaaagca ctggaaatat  
64021 agcgaaggaa aatcagccca atgattacct ttctatattc agcggcaggg atgtgtcccc  
64081 ataacacaca ggcagcatcc caaatttggt tttcaaagcc aatgttggca ttgttctttt  
64141 cagccatttc cgattctccc actctaacag tctattgtag ttatgcttct tcagcttata  
64201 ttctaccaa gaggctatcc cataaaacgg acatcttact ttcgtccgg aactatttcc  
64261 ataatatcgt caaagtgca gcccagggtga gaacagattt tcacaagcgt atctgtagtt  
64321 acattctctc ctgatgcat tttattgatg gtatagtac tcagatttgc ctgttcagcc  
64381 aaatctttt tcttcatac tcggtcaatc aatagcttcc atagtctctt atagtgcaca  
64441 gccatcattt caccattcct ttcttcaga tttttgttc aaaaagtacc tgtacttata  
64501 attatagcac gcaaataagt aaactcaaca agaaagtgag ctatcactat attttattt  
64561 ctattccaa agaattatcc gattttttaa gtgacaaggc ttttagagca tcgagaagcg  
64621 gaattttggg gttttacaaa ttggcaagca gtgtaaact gtacaggttc acttatttcc  
64681 tcgattttcc ctccgggtga atcttcgcaa atttgcttgt tggagaagca tccccaatcc  
64741 ctttgaacg gtatctgca taccggctac tcgttcattc tgaacgctt ctggagaaag  
64801 aaaaaactg gactaccatt tgctggggtt agatagcgt actttttaca tctaccatgt  
64861 tgcggcggtc atggtgaca acttgcgtc gtcctgctc ggtatcaacc tgtccgaca  
64921 agctataatg gatttcgatt ttccgggtgt tggtttccc gtctaattca tgtatcaaaa  
64981 tacggtcgt aaactcatgg acgttttcat aggtcaattc ctgtatgtcg ctgtatttcc  
65041 cgacaactg aataaacctt gatatatccc ttttcgctc ggtaacggtt gcgatctgct  
65101 gttgtaactc gtctatcctt gcggcaaggg atttctttc gtctcatag ccggaagtta  
65161 gaaacacaaa ccgttcatct gtcagtctgc ctaatgcgtt gtcctcaca agcttgcgga  
65221 aaagcgtgac aagttcggtc atacgcgcct gtgctttgaa aagttcctt tgctgctgcg  
65281 ctaatgcctt tctcgttcc atgtcgcct actcggtagc ttacagata aagtcctgtt  
65341 cgtgttctt aacataccgc aaaaccgcc gcatacttc cagcactaaa tcaagaagta  
65401 cgtttttgcg gatataatga gaggtacact cgctgcctgt ccttgcctg ttgcgcatg  
65461 cgccgcaaga ataggaaaac ttgcgcggt cgatatttac gccctgttg taatacatct  
65521 tatgtctgca accagcgcaa aacagcaagc cggaaaaaat atcaatctcc gctgctttg  
65581 tcgggcggtg gcgggtagca atccgcttt gcgcaagttc aaaggttcc tcgtcaaca  
65641 gcggctcatg ggtgttggg aagaaatagc gttgttctt ttcgttctc cgggtctttt  
65701 tcgacttgta ggatacctt tgagtttctg cggttatggt atgccctaaa tattctgccc  
65761 ttgctaatat gtcataagc gttttgtcc gccaaagata gggggcgatc attgcccgt  
65821 gataccgctc ctgtcctgta cgctgatagc gcaacgctcc aatcgtcaag actttgtttt  
65881 ccgcaagcca ttttggatt tcgcacatac gcacgccgt acaaacata gcgaaaacct  
65941 gtttgacaat cggcgcggtt tccgggtcgg gtataaggtg gtggcggtt tccgggtctg  
66001 ggatatagcc gtatggatat tcccgttga cgcgctgcc ttttgcgcc tgtcctgtt  
66061 taactgcgcg gattttctt cttgtgtcgc gggcgtaaaa ctcgttaaac cagttccgca  
66121 agggggtaaa ctggtatcc tcccgcgtg tgtcaactcc gtcgttgatc gcgatatagc  
66181 gtactccgtt ttcgggaaat acaatctcta tgagttcgcc cgtttcaga tagtttctc  
66241 caagacggga aaggtcttg gtaatgaccg tcgccactcg tccggcttcc acttctgca  
66301 acatcgttg cagcccctc gcctcaaac tcacgccgga aatccgtcg tccacaaaa  
66361 actttgtgt caaaaaatgg tttcgtccg catagcgtt aagtatcatt tttgtgtc  
66421 gtatgcttcc gtttctccg gttgcatat cctctgact taaacggcag taaagggcgg  
66481 tgattttatt cgactgtaac attagtctc tttccgaca gccgaataa caggtataat

66541 gtgttgctat cattatacca tatcccgccg cctaattgcac tactcggacg ctaaaaatcc  
66601 cggatttccg ggcttttct gcaaatcctt tacaatgagt ttctcaatct ttttatggat  
66661 tgtatcgggt gccttttcac tcggcaacgc ttgaacaaga taggtgattt tccctattht  
66721 gcgttcgggt gtaattgtct gtttttattc cattagaaaa acctcctttt cctgtatgga  
66781 taaactatat tctgcaaaaag gcaaaaacgg gcggttgta gctgcaacct cacgggagtt  
66841 tcaccccggc ccatgcttat gggcgcgcg cgcaatactt tgagggtggt caacgcggga  
66901 gtatcattgt gccgcctgt atgtcgtcgc ccacaagctg ctaaactgt tttacggcgc  
66961 ggtagttct gctcggcttt tcccctatgg ggaaaagctg tcatggcgta cccgccgact  
67021 ggctcggtag agacggaatg taccgcttg cctgttatgc tgcgcacca aggccgcttt  
67081 cttgtcaaa gaacaatagg cttgtcggc ctgcaaaaag acatcaacag cggatatgt  
67141 tttgcggaac gacaaatagc ccataacggg aagcgtggaa aggggacacg ctccccgat  
67201 gggctaaaag attatctac atgaaaagca agggcgcggg taataaggcg cacttgacg  
67261 ctgttacgca tttcctcgtc cacataggaa taggtattgc ccgcgtcgtc ttcagcgtg  
67321 cgggtacaaa gtttcgctat gtaaccctcg tagtgctca agatcgcgca catggcggtt  
67381 gtgtcgcctg ttccgctgc ggaaatgaca gggaacggca acagatttc agacttcta  
67441 acggtattca tcatctgctt tccctcaa atactgttg attttcgcaa gcgcggattt  
67501 cctgtgccgg aaaaccgtc tgcgtacaac attcagcagt tgcceaattt ccgcgtcgt  
67561 catatccaag aagtaggaca aaaggataat gtcgcgttc ctttcgggca aagcgttaag  
67621 ggcttcggca agcagttcat tttgacgag tacatcaaag ccggacactt gaaaacggaa  
67681 ataactgctt tcttattctg cgttggtgaa aagctgcgcg agttcgttt cgtcaaatc  
67741 cgaaaaagta acttcgcgtg ctgcgcgttt cgcaagagtg cggcgggtggc ttttcgctc  
67801 gccgacaaa gttttcttg ctaatgcgtc gtactgatgt tgtattcttt cttgtcggc  
67861 agaagatagc tccatagagt tcaactcctt cccgcgtgga gtagaggacg ggagttaag  
67921 gcttgcctc tctgccctt tgcctccgta cccgttcggg agatggctct tgagtgcgt  
67981 tttcagaaaa aagttgaaaa aagcaaatg cgcccgtccg caagacgcgg acgggca  
68041 aggaaatgta agcagtagct aaatgtattg acagttcaca ttcataccg gaatatccc  
68101 cttgcggagc atagctttt ttgaccgcaa agcattaggc gggttacagt aaataaaat  
68161 ggacacggcg atacctccc gataccgcc tctcctaaa aaaggcgac ttaatacac  
68221 taccgcaat ccattctata ataggaaca gcggctttg cgcaatatta aataaaaag  
68281 ccgataacac ataggtttt tgacctatg cgttatcggc tctgcgtcta tgcgtcggc  
68341 actttaatc atttttttg aatttattat atgtgttagc taactgtca caagccgct  
68401 taatctctt gccatgagaa actctcatag taactcaag tctgcttgc tctaattgat  
68461 gttgaatgc aactattcc cgttctgtg gtgctttaa tctgaattg cttgtgggt  
68521 tgtattgtaa cacgtaatc ataactttt tgccccgaaa ccattttgca agttgtcta  
68581 catctgaggg ccggtcattt ataccggta aaagcaata cgcaaagaca atttgcgat  
68641 tatgccttc agaataggat aaggcttct taacaatc ttcaatagca tatatcgca  
68701 tgtgaggaat aatacattt cttgcagatt gtgttctgc gtgtaaagat attgtcaat  
68761 gaattttaag atgtcctcgc cgcaatttt ttaattgatc gaccggacca actgttgata  
68821 tggtaatgcc gtcggttga aagttgagcc catatctatc tcggagaata tggattgctt  
68881 ttatcaagtt gtcataattg aataaaggct ctccatacc cataaaaacg atacggtta  
68941 cttttcagc caacaatata atctgttga cgatttctga cgatgtaga ttacgaaca  
69001 agccatttcg cccgactca caaaaaaac aaccaacagg acaaccgact tgtgtgctca  
69061 cgcaaacagt tccacctct cggcgttga taaaaccgt tcaatgtat ttgtgtctt  
69121 tcagttcgta aacatactt tcagatcac tgcttttga aatattttt accaacattg

69181 atagatTTTT tttgcTggt aattgcttat ataattcttc atataaggct tttgcttcat  
69241 tctcgccaat aacttccgac atttctttgt aagtaaacc gtatggatca ttcgctactt  
69301 ccgaggcgt atatttaggt aaacgtttca tttttatc ctttcttcta aataataaaa  
69361 gtttgTTTT ctgtattttt gattacaatc tctaattttt ctacatcaat gatatgcgtc  
69421 aatttgcatt tagggcagaa aagaggaaaa tcttttaata cagtattatg aaatacttga  
69481 actctcgtct ttcctgtaca aatcggacat tttatccaat attttggtc tactccaaaa  
69541 gtagtggata agtacctttt gtgatatact tgtcacgggg tgatgaaaca ggtggaaaaa  
69601 aacttcacag cgatgattgc aggttctctc aatctaagt aaccgtggta cgtggaggga  
69661 gctgagtcc gtccggaaga gcaagaagt catatctac tcaatgtcag aaagactgca  
69721 gccctcgtct gtccatgctg tggcgggct actttacgta acggctatga gccaacagag  
69781 cgtgtttggc ggcacggaga ctgcatgtt tatccgacct acgtccattg caggcgtcca  
69841 cgggtgaagt gtccaagggt cggcacgaag cagggtgaacg cccatttga gcggaagaac  
69901 agccgcttca ctctgttgtt tgagggtctat gccatgctga ttcttgccga catgccaagg  
69961 gctcgcgag cagcagtgtc tgggtgcgat gagaaatctc ttgcctctat actcaactat  
70021 tgggtagacg atgcggtgag taatcgtca ctgagcggcg tgaagcggct cgccatcgac  
70081 gagacctctc gccttcgggg acatgactat gtgacagtgc tgatcgatgc cgaccaacgc  
70141 tgttaaatcg acgtagaggc aggcagagat aaagccacgg tgtccacctt cgctgagaaa  
70201 ctggagatgc gtggtggcaa tgcggcgcc atctgtcgg taacaagcga tatgtcgaag  
70261 tcttacctgc cagccattga ggaaaactc cctaacgccc tgagcatcat cgacaaattc  
70321 cacgtcaaga aggtgtgat ggacgccctt gacgatgtt gcaaggagga gcagcgaacc  
70381 gctgcgtcca agaaagagct ctttcttggg aggcgtctat tcatgatccc caaagccagg  
70441 atgaccagcg aacaggcggg aaaactggga tctctgtcca agctgtatcc caagactggt  
70501 aaggcttaca gcatttagc aacccttgat gacttctata cctgccaac ggtggaggaa  
70561 gctgaacagg ctttcgaccg cctctactca tggatgcgtc gttgccgtt gaagccaatg  
70621 aaagaggccg ccaagacact ccggaaccac aagacgaaga tactggctta ctctaccac  
70681 cgcataacga atgtgtctg tgaggggatt aactccatga tacaggcggc aaaacggaag  
70741 gctcgtggct ttaatacatt cagaggattt gcctcgtatg tataccttgt tgctggcaag  
70801 ttacagctgg ctgtgccag ccccttttga cccttatcca ctaaaattgg agttgaacca  
70861 ttattgcgta ttgtcaatct ctctcaaacc gggtagtaaa aatacggcaa gcgcaacgat  
70921 gataatgcca attccgcaa tgacaaacca ttttcaact cccagccgct ccgccagagg  
70981 cccggaaatg acaaggcaa acggcatggc gagggaagcg gcgcttgtca gtagagaaa  
71041 aacttcccc agatattctg gttgaccgt tcttgaaaa atcgatttt gcacaccgta  
71101 aaatggagcg gaaattcca taacagtaca gcacacaaca aagacaagaa atgcgtctgg  
71161 cggcaaaagc ccggagagca tattgctaac gccatcagg agaacggaaa gaccgatggt  
71221 gtaccgccgt tcttaaaac cgcccaaat gctcagaatg actccgcaa gcagcatacc  
71281 aaccgcaaaa gcaattttag cggcagaggc atgggccggt gttccttga agtatgacat  
71341 acagatgaga ggaaaaagcg tactgattgg catataaaag aacatataaa ttacaccaat  
71401 ccagagcaga gcaagaggc cctgttttg cttaataacc acatacccct cttcatatc  
71461 ctgtaaaaac tgttctttt tcgtttctgg acatagtta ggcgttggta tggacgaaat  
71521 cgcaacagtc acacaggcaa ggattgcacc cacaatatct aacaataaa ttgattaag  
71581 aggcaaaaca gcatataaaa acgctcggc agctggactg ataatgcac ttactgctg  
71641 catggtctgc gtgtaaccag cgcattttgt aagttcctct tttggcaca tcataggtgt  
71701 tgctgcgctg aatgctggag aatgaaaagc agttcccga cttcgatta acaggacaac  
71761 cataatagac catacgggca attcatgta aaacgccacc agcgcagaa taccgccagc

71821 ggcggcaatt atcaaatccg caccaatcat tacgctttta cggctgtgcc ggtcaacaaa  
71881 agcacctgca aacgggccta aacaggcttg cggcaaaaat ccaatcagtg ttgccgacct  
71941 caatatgatt gcagaattag ttttcgcaac caaataaaag ataatggcca tttgcaaaat  
72001 accgctgcta ataaaggata ttgctgtcc ggcaagaagt gtaaaataag tttttctcca  
72061 tgaattgttg ttttgggtca taatgcgaac ctcctttttt attgcattgt tcctttgttt  
72121 ctgcaataaa aagcaggcgt tgtcccacag agagggcaga cgctgcata acaacaaagc  
72181 acgaaaaaac accacgatac agttcaaaga ctgctcgtgt caaacctacg tgttcctttg  
72241 catacgacg caaaaaaagc ccacatcat gtggaaaggt acttctactt tttattgctt  
72301 attagcgtac acaaattaac acacgtaagc ctccttcaa tctcaaactg tcgcacagta  
72361 taacacacat ccgatagact tgtcaacat ttttaacctt gttttccatc ttgtttttcc  
72421 atctcttac ggtagtagca aagccaggcg agccagtcaa cggtaaatgaac gaacggcgct  
72481 tcagcgccg ccgttgacag tctcgcccgt ctttgtaat gggtaataca ggcgggaaag  
72541 ccattttagg gctttccgc ccatttcaat ttggggagaa gaaaggccc aaaatgaacg  
72601 agtgcggcca aacactttta gggattggcc acctgtcca ccatccagc ggggcggcgg  
72661 ggaacggtca aggccggcg tcagcccatt cattcagcc ttgacggttt cctgcccgtc  
72721 tgctactttt cccggagtgt ggccacacat ctggtcacgg tgtccagagc tttgggactt  
72781 tttgtccat aggccggggg cggaggacga gggacggggg cttcataat acgcctgtc  
72841 tgctgctgaa atcagccctt tgtttcggc ttaccagccc caaaciaaagc cctgctttcc  
72901 tgcccgctca aatgccttg cctccccgg cggcaacggt attttcaggg caacgccgac  
72961 agagcgtata acacactaca ctttgctccg caaagtcgtg tgccaaatgg ggcgctgcc  
73021 cttttgaaa cccccgaac aaacaggtgc tatgcacca gccgggagca tagcgcctgt  
73081 tgtgtcagc agcccgttc acggtctcgc ttagttcct tgtaaactga ctaaaggta  
73141 atgataacgc ccgcaatcgg cacaatgacg ttttccgata ggctgcgtat catattgaat  
73201 atgcccgcgt tccaccggc ggggggttg cgcactgac ttgctgattc tccaacctc  
73261 gtatttacg tgcgaacag cccggagaga ttagagagta ttccgtctgt caaaatgccg  
73321 cgaaaccaat cttcaatcat ctgcatatc aaaagctaat cctcctttc ccgcccctc  
73381 ccgctgaag cgggagagc cggcgggtag tgtagtttg tggcattatc caaacaggcc  
73441 ggagagcagc gggacaagg taagccgat aagggaacg ccgccccc ccatcaactg  
73501 tttcatgcc tcgacttcg cccgggggtt atcgttgcg taccctcca tgaggtaat  
73561 gccgccccaa atgccaagtc ctgcgcaag cgcgattacc aaagtctgca atacgtcaac  
73621 tgcgctgttg aaaaaatcca tataaacctc gctttctgcc gctaaaacgg ctcaaaaaat  
73681 gttgttgaa ataaaaatgc gcctgtttt attcggcggc tgcgtcctc tcggacaaat  
73741 ctatttcgta tatgtcaaag gttcgtcgg gctttacgat tgccggacgg gtggacatat  
73801 accgttcaac gtcaaaagc ttttctgt cgaagtcgga aaggtattg tagttcgggt  
73861 gctgcgttat atcgtactta tcgctgaaaa aggggcgcac gccgcgcaac tgcaaaatac  
73921 atttctctc gtccataact gcgattcgt cctgtgtcat caactcctt cccaattct  
73981 gataattgag gccatgagaa acctcgtgc cgcgatttc ggaagtgtg aaactgtcga  
74041 ttgtttcag tccaagttc tccgaaatat ctttgcatt tttcccgc cctccaaaa  
74101 acaaggtgct gtcggcattg tcaagtatga tttctgccg gtcctgttaa atggctttta  
74161 gctggctctg cgattgcaga atgatagaag ccgagattc ccggctcgg attgtggcaa  
74221 tcaattttt aaactgcggg atttgtcaa tgtttgcaaa ctcgtctaac aggcagcga  
74281 catgaaccg cagcttgccg ccgtattcgt cgtcggcctt gtcgcacaag agattaaata  
74341 actgcgattg cagcatagc ataacaaaat taaacgtgct gtcgctatc ctcaataca  
74401 aaaacaaagc tgttttctg tcgctaacg gtcaagttc taattcgtc taggacataa

74461 gatcgcgcaa ttcctttata tcaaaaggag cgagcctcgc accgcaagaa atgaggattg  
74521 attttgcggt tttgccgcc gccaatttat attttcggtta ctgcttcacc gcgaaatggt  
74581 cggggctcgcg ttctccaag tcggcaaaaca gcaaatcgac ggggctttga tattcctcgt  
74641 cgtcctcgcg ggcttcgctg gcgttgataa gttccaacag ggtaataaag ttcatttct  
74701 cggcgggggc ttcgtaccag atgtagccca ccaacgcgca atacaaaagc cgttctgcct  
74761 ttacccaaaa atcctccgcg ctttttctc cctcaccttt ggtattcgct atcaacgtat  
74821 ttaccagctt caaaatatct ttctcgtgc ggatatacac aaaggggttg tagtgcatag  
74881 atttttgaa gttaatcgta ttcagtacct taatgcggtta gcccgccctg tcagcagct  
74941 tcccgcactc aatcaaaacc gtaccttcg ggtcgggtta gacgtaagag gaatgaagct  
75001 gcattagatt aggtttgaca aaaaatcttg ttttccgct gccgctgccg ccgatcacga  
75061 cgacgttctt atttctcgcg tacttcggct gttcggggcg gctgttcag gtaagccgtt  
75121 ccgtctcgt caaatgatg ttgtttgga aatccgggtc tatgtagggc tttatatct  
75181 cggcgtttcc ccatgaagcg tttgtcaag tgctttttg agttattgac gcaaattct  
75241 gtgaaagtgc gaaagtcaa agtgcaaagg gtctgcgttt tgcactttca gcttgcgggt  
75301 tcgggcggct gcttcttct gatgaagtta taccattgac cgccgacacg cttgcgccc  
75361 aaaatgctgc ccatgttgcg cttggcgttc tgtaccgtcc tctcggatat tccggttcg  
75421 gctgcggcct ttacaatgct ctgcctggca agctcttcc cgtctgcaag caggtaagt  
75481 atcagcttct cggcttctt ggtcttggtg gcggtgttcc cgcccgcc ggatagcagc  
75541 tcgtcggcgg ttatgtcgtta ttcgcctatc catgaaaagc ctgtttccgg gtcaaggcaa  
75601 aaggcaacgg gcttgcctc cggcgccagg gaagattgt catggacgat aacacgcaca  
75661 ttcggtccc gcttcacgcg cccgatcagc aggacgtcc ttgctcggc gcggaagtcg  
75721 atagaaccta agccccgta tgcgctctgc cctccggcag cttgttcaa gtgtccgata  
75781 aggataacgg cgcaccggg acgctcggca acatcggcaa gacggcgga catggggcgcg  
75841 actcgtttg cccggttcat gtcggtctt tcgcccattg acgctgtat tgggtcaagg  
75901 ataataacc gcgccccgt ctgctgatt gccttttcta tgcgctcgtc ggagagggtta  
75961 agtcccgtg tggcttcatc aatcacaagc acgcggtcaa ggtcggcttc ggcttctatc  
76021 aagcggggct tgacggtatc gccagcccg tctcggcgg tctggtaaat cacttggat  
76081 ggcggcaggg gcttcattcc cggcagcgtt cccccggtg tgcaggcagc ggcaaggct  
76141 agggcaaagg tggcttgcg ctgcggggg tgccttgca caatggttac tttccgaaa  
76201 gggatatacg gctccatag ccatcaacg gtctgcgtg caacctcgt catgcggata  
76261 atctcagcg tttcttctg cggcggctt ttacggcgt aaactgcttc ctggatatac  
76321 ttccgtctg tgatttctg ccggtcgtc aatacctcgt tccagtcctt aacagcggc  
76381 acaaggcggg ggacggtcaa gccctccgc acaagctccg caaggcggct acaagcgtc  
76441 tttccggtt ggtcgtcgtc aaggcagagg taaacggtct tgatgttcgg acggtcagaa  
76501 aggaaacgca atagggctt ttctccacg ccgccaatg acaaatagct ctgcttctg  
76561 cattccttt tgaacaggca gaggaaagag agcaggtcaa cgggggcttc aaaggcaaaa  
76621 agcctgtcgc cctcggccc gtaacagaaa ttaaaggctt tgcgctgcc tttcacatc  
76681 agccggaagt tttccgctt tcccttctg tggcgtagc gcggtattcc gtctcgtcc  
76741 cgccccaca atacggcgtt tggtgggct gcgtcctcgt aatatcgcc gcgggcaag  
76801 aaaaagccc tcacatctt atcaatgcgg cgggctcgtg tgaggtagtt cctcgtggt  
76861 cggttgtcgc tgtttggggg tggtagccg aagtcggaaa gggacgccc gcaaggtctg  
76921 tccggcggcg gtgcggctcc ctttctctt gtgagaagt ccacggcttc ggtgaagctc  
76981 ttgccgaaaa actctataac aaaaatcaac gggccggcc cttgctctg gctgtgcctg  
77041 taccattgt tttccggac ggtcaagctg tcgtgccgtt tccagcgta ttattccc

77101 gcgcggttaa gctgctgcc ctgtgattgc aggaaagaaa caaggtcggc ttgattcgcc  
77161 cggctctatct gttcttggt gtagtacaaa aatctcaact ccattcatcg ttctaagtcg  
77221 tgccgcttg cgcggtctg ctccggctgg tcggcttca gtgcaatac aacgcactg  
77281 cggatattgt gcagctcggc aacctcggcg cgggttctt tcagcttgg atattccgct  
77341 gttctctgcc cgctgagagt ggcgtactct tttccatt cagagatagg caaggtctt  
77401 gtcctttcg gcagattgc atggagatag cggctcgtg cgttccatag cgtaagctcg  
77461 gcgcggtggg cttctcgtg cttgtcacgc ttgctcgtcc agccatttt cagcttttc  
77521 agctcgtcgt gaatgggctt gtactcgggt tagttctcc cgtattcaat caatttctg  
77581 aattcttca tgcgcttctc ggcggtttc atgccctcc ggatagcgtc ggcttggtc  
77641 ctgacagagg aaagggcagc gtccagctcc gcaagggtag aaataccatg ctcgaaaga  
77701 tagtgaccg ccttgcaac gttttcagt tcatcggcgg cgtgctgct ttgccaactc  
77761 tgcgaatact tccgctctt ttctctga acgctaaat acttcatcag cagattgca  
77821 aggccggggg attgcggggg ctgctccggg gcggtttcc gcgcttgaa cagttcgcca  
77881 atcattctt tgagcttcc aatctcggc ctgatttcc ggataaggcg gttgcctt  
77941 cggatattcc ggttcagct gccttctcg gtggctatgc ctttctc cattgacag  
78001 gccgctacgc ccatgtggac ggtgggcagc tcgtcaatgc gcgctcggc gttgctcgg  
78061 tagtcgatac gctccgggtg tccggcgt tcaaggtagg cgttgaaat atccccat  
78121 gccttgcgc ataaaagcgc gttgccctg tcgtccagc ctgtgaggtc aacttgtg  
78181 gtctgtatc tgccgcttg taagcgtatg cgctcggct tctcgtcaag gtcatattc  
78241 ttttggact tcgcccca tgcgccgc tcgtcaagg ggcatggt aagcatgata  
78301 tgacaatggg gttgctcgt gtcggtgctg tgaatggcaaatcaacgca cattctct  
78361 gaaacaaatt gagaggaaca gtattcacgg acaagccgga tctgttctc tctggataat  
78421 tctatgggga gtgctcgtc aatctctc gcaagctggc cgttccggc tttctgtaa  
78481 agctccacgc tgtccacaa gttgaacgg tcagagaaag agggcggggc atggggcggc  
78541 agtaggattt ccgatggac aacgccgc ttgcggtgt agtcatgggt cattccgtc  
78601 cactcgttg tgaatttct gccctcga taggcggctg cggcaacggc tgacttgcct  
78661 tttctcggc tcacaatgcc gatgttcaa tggtaaag ctatgggtat cacctccgg  
78721 ataggataac caaacccgca aaaatgtac agacccaac ggcgggtgta ctgttttgt  
78781 ggggtgctcag ggatagccgc gtaagcggc caaggggtc agcccctgt tgcggcaaag  
78841 ccgcatatc ggagcgggg gaaagtccc tgtcgggaga tacgccctc gcagagcga  
78901 cacgccgca aggtgtata agtgcgcct ttgtccaaa gggattattc gctttccc  
78961 ccctcgtgc gtttttctc ataagcccgc gcttctcgc tcgtcagggc aagccggaga  
79021 aagcggcgg cttctcatc ggtcatggtc ttgcttccg gcacaatgct ctcaaagact  
79081 gcgctcggc cgaccagccg gtggctcgc gtccggcgtt cctctggga taactttgc  
79141 cgcaaacct tttccgatt tcaagctgc cggatttct tcttccgct ctcaatctc  
79201 gttgcaatt cctcgtt ttttctc gtttctc ggttggtcac tcttctac  
79261 ctgtcggcat agaaaaagga cagtcgatt cctcggctgt cttttgatt aggtgtttg  
79321 gttactccg ttctgctcaa taaatggaa tattaatat caatacggc ttaatacat  
79381 tctatataa acatcagctt cgattgcaa atgtgtgaga gtacccaat caacgaatc  
79441 ttttcaacg caaaagagaa gcggcgtcat tcaataaac gacattctt gttctgatga  
79501 caactgtac gtggctgaaa ccgttctc tgaatggtt ttaagatatt tctaaaata  
79561 tcaacgaca gactcattg aataatctg attttcaag tgtgcttca ctttagtct  
79621 gatttccctc aatgattt tcgtaggaat tactttcaca acatccgt taggagatag  
79681 caatcgtga aattctt agtgtcagg cgaaaatag tctaaaatac aatccatc



79741 tccgtctttc aaaggattt ttgataagtc agtaacaaac cacttactg ctttgcgctt  
79801 gtctttttt gatgcaatct gtattgcctc cttgacaag tcaaaggcaa agatgtttcg  
79861 ttctgttctt tgctgtatct gccttgata gaaaccctcg ccgcaaccaa catctaaaat  
79921 gtttcttata gatggcgtat cagaaataaa ctgtatgatt ttccaaca caacatcata  
79981 catgccatac tcaaaaattt ggtgccggtt gtcaaaagac cgcttgctgt agttggtttt  
80041 gggcgatgat ttaacaaca aattacata cccatatctt gaaatatcaa agcaatgtcc  
80101 atgtctacaa attaggctat tgccttgat atccattgat tttgtgcaa ttgggcattg  
80161 aaaataaacc ttgctgtctg caaagcgtga taaattatta ttcattgtt tttcctcgt  
80221 aattacatct ctgcttcaat aagcgagtta tgccatacgg ataaccgcaa cataactcgc  
80281 ggttttatct taatctcata aatgtaacca ttgtgtgtc ctccaatcaa ttccgcagta  
80341 ttactctgct ttagaaaaa gtatagcaca aaactatgaa catttcaact ctattcagc  
80401 ctgtcggcga cgttgcttc tctggcatac cgccgcgccc ctcccgcg tttctcgtg  
80461 tatggggcgg tcagacggaa agagaagcgg cttttctcaa tgtcaaactc catgcagccc  
80521 gtttccgggt ctgcgtcagt ctgctggcag atcggcgat aacggcggct gtatgcaagc  
80581 agacgctttt tcaaggcggg gttgtgggtg cggatatgga taagggggtc tttctcgtca  
80641 aaccaaatac cgggtgtctt ttctgcttg gtaagccctg ttctatgca aactccttc  
80701 tgtgccctg ttacgcaata ggggcatttt tcgggtgtt tctccggctc ttgactgga  
80761 gaaaacggcg ttttgacga taaaaccgc ccggacgtgg aatgtatcgt cggggcggct  
80821 gttatcga gatttccgat tttccggct cttgaccgtc agacgcagat aaacacgaac  
80881 tgtcggcaag tatcgtctg agcagcttgt gcggaatgt ttctgtctg ctgtgattga  
80941 aaaataactc cgcaacaata gtctgcccgt ttctctcgt cgtgatgata ctgtcggggg  
81001 tctgttctgc cataggcagc tcctttctcc gggcacaaaa gagggacttc ccgtagccgg  
81061 aaaatccctc ttggttctg gttattctgt ttactgtgc gggctgtcg gggcggct  
81121 ggcctttct ccttgcccgg tattcccgcg cttgatacg ctactactcc cgctgctttt  
81181 caaggtttcg cgcccgtac tcccttgaat acttccggtg gtaggcgcg ctttttct  
81241 tttggctt tcgatttct tcccattt gccgattt ctgctctgc ggctctgcaa  
81301 gctgcgttac ttgttctca aatctccga tatagttgaa atatatgctg atgtctgga  
81361 ttgcgtatct gccttttc tggcgcgct catgcactt aatctctg ataaactcgt  
81421 tgagaatggc gggggtgagg tcagtaaagg cggcatggcg ttccgtcagc tcaaaaact  
81481 tctgcgccc tctcccgc ttctcataag cggatagctg ctcttgagt atggaaagct  
81541 ccgtttcaa tgcgtatg tcttctgaat acttctcga catttctc tagcggctt  
81601 gcgggatagt gccgaggcg ttgtctcat agagcttgt cagcacctg tcgatctgt  
81661 caaggcgcgt cgtgattgt gggatacgt tctgtctt tttgtctg tcggtctgct  
81721 gcatggcaag gttcttttc actaaggctt caaactccgc ccggttctg atagaatag  
81781 cctcgattt cttcagcact tccgcgacgg tctgcatgag caagtccgc tcaatgatg  
81841 gcggggaatg gcatttggg ttttggctt ttccttgt gtactcgtg caataggcaa  
81901 cgtgccgctt gccgcttt ctgtaatcta tgcggatgt cattttgcg cgcaatcct  
81961 acagaaaagc aagcccgaca aagggtgat tccccgtcc ccgttggggc gtctgacggg  
82021 cgcgtttcc aaaatccgt gtgcggttc aaagtcggcg cgtcaataa tcggctcatg  
82081 cacatttct gttatctgcc attggctcc gtctacatag tggttccgt tgtccggaa  
82141 atgctttgta gtctgaagt tgactacat gccgcaatac tctgcccgt taaggatag  
82201 ggtcaaagt gctttgttc acttgaacg gttatctca ttgagcgccc tgttttgca  
82261 cgttccccgc ccgctctt tcatgtagaa tggggcgtt gggatttgc cctgcgtcag  
82321 atatacggcg atttgggtg gtttttcc gtccagaaac aggcgaaaaa tcaaacggac

82381 aactccggcg gcttcctcgt cgattatcca aaaatccttg ttgtccgggg atttgacata  
82441 gccatagaga gcttcggtgg caatcggctt tccactcatg cccttcgtct taatgccggt  
82501 ctttactttc ttgctgatgt cctttgcgta ccactccgac atgatgttga taaagggcgc  
82561 aaactcaat gtgtcgggct ttcgctgtc tatcccgttg ttgaccgca taaagcgcac  
82621 attgttccgt ctgaatatct ccatagcgtt gccgacttgg agatagtcgc gccccagcg  
82681 ggtcatgtct ttcataatac acacgccgat ttaccgttt tctacgtcct ctatcatgcg  
82741 ggagtaggcg gagcggtcga aaaatctgcc gctttcatcg tcgtcaatgt agtgccggt  
82801 attcgtcaat ttagctgtc tggcgtagct ttcaaaaaac ttcttctggt tctgtatgga  
82861 gttgctttcg ccgccgtccc tgtcctcgtc gcctacggaa aggcgggagt aaagggctgt  
82921 gattttgttg taatcattca tgtgcatatc ctctgtgcg tccatgtaga gttctttaca  
82981 ctaagatta tgactccat cgggcagagc cgtactccgc gcccttgagg tatttcttcg  
83041 cgttttccc ttgacatag actatcaagc ggataatcac cgcaccgaca atgccgaca  
83101 gcaaatcaa cgggtaaacg ctgcgcaagg cgtttcaaa ggctgcggaa aatccttgtg  
83161 tgatattcag tatctttgca gaaatatccg cgccgggggc aagccgcacc gcctgtccga  
83221 ctttatcaaa gagatagaca aagaacacat aggggatatt cggaagtatc agctttttgt  
83281 agttgatctg cttcatatct cgcgccccct gtccattttc ttaccttgt cgccggcggc  
83341 gtaagctgc ttcgccttgt cctttgcagc ggcaagggtt ttgcggatag agggcttttt  
83401 ctccgggtc agcttctttg cggaaaactc ttgaaacgct gcggtcataa cgtccgcgtc  
83461 ccggcctttg aaaaacacaa ggtaacgggt ctgctcggcc ttaacctttt ttagcgaaaa  
83521 atctatgttg tatttcttcg ccgtactctc aaaggctta atattgctgt cggatgctc  
83581 gatgttgaa acaccgcgt tctgcttcat aagctgccgc atggtctgtt tccatgccc  
83641 gggtttgctt ttctgtcca aaaactttg gattgcttc tgaacgcct gtcggtgaa  
83701 ccgcgccg ccttttcca ctttgacgta tagggcaatc gtttttggg ttacttctc  
83761 ctgcaaggta tcaactcctt tcccggtaaa gtgcggctat gtcattcgc cgccgtataa  
83821 gtcgtgattg acaagggcgg tatagtagct gtcaatgga ctcggcgcgt tgaacagcac  
83881 cgcttttaga tactgcttga tgttcgcac ttggttgg ttctccctca tgcaatcaa  
83941 acaaaactca atattggctg tttcagctt caaaaactg gattcacca atcggcggg  
84001 gtatgctcc ccggcaatac ggattgtct tcgggctgtg cagacggtt ccagcataag  
84061 gtacaatc tcgtccaaac ggtctttgtc aattttgcag tttgaaatga gatggtcgt  
84121 ttgatattg tcttgataa tctccctgta atctctact gcgctattgc ttttcgctc  
84181 cgttctttc cttccggcg gcgtagccgc ttcgcatgc gcaaaggca aggggttag  
84241 ggaatggaaa ggaatggaat cggacttga taaatcagta attgattgt cttacttaa  
84301 tatacttta ttggtcaac tcaatttta gtggataagg gtcaaaagg gcgtggcaca  
84361 gccagctgta acttgccagc aacaaggtat atcatcgagg caaatcctct gaatgtatta  
84421 aagccagag ccttccgtt tgccgcctgt atcatggagt taatcccctc acagacagca  
84481 ttggtatgc ggtgtagaa gtaagcagc atcttcgtct tgtggtccg gagtctttg  
84541 gcggcctctt tcattggctt caaacggcaa cgacgatcc atgagtagag gcggtcga  
84601 gcctgttcag cttctccac cgtttggcag gtatagaagt catcaagggt tgctacaatg  
84661 ctgtaagcct taccagtctt gggatacagc ttggacagag atcccagttt ttccgcctgt  
84721 tcgctgttca tctggctt ggggatcatg aatagacgc ttcaagaaa gagctcttc  
84781 ttggacgag cggttcgtc ctctccttg cgaacatgt caagggcgtc catcagcacc  
84841 ttctgacgt ggaattgtc gatgatgctc agggcgttag ggaagtttc ctcaatggct  
84901 ggcaggtgaa acttcgacat atcgcttgtt accgcacaga tggccgccg atgcccaca  
84961 cgcactcca gtttctcagc gaaggtggac accgtggctt tatctctgcc tgcctctac

85021 tcgattacac agcgttggtc ggcacgac acgactgtca catagtcacg tccccgaagg  
85081 cgagaggtct cgtcgtggc gagccgctc acgccgctca gtgagcgatt actcaccgca  
85141 tcgtctacc aatagttgag tatagaggca agagatttct catcgcaccg aagcactgct  
85201 gctgcgag cccttggcat gtcggcaaga atcagcatgg catagccctc aaacaacaga  
85261 gtgaagcggc tgttctccg ctcaatggg gcgttcacct gttcgtgcc gcacctgga  
85321 cactcaccc gtggacgct gcaatggac taggtcggat agaactgca gtctccgtgc  
85381 cgccaaacac gctctgttg ctcacagcc ttacgtaaag taggcccgc acagcatgga  
85441 cagacgagg ctgcagtct tctgacattg acgtagatat gcacttctg ctctccgga  
85501 cggaactcag ctccctcac gtaccaggt tcaactagat tgagagaacc tgcaatcac  
85561 gctgtgaagt tttttccac ctgttctac acccgtgac aagtatatca caaaaggac  
85621 ttatccacta ctttggagt agagcctct tattaattg cgttggatt tccaacgtag  
85681 gttttcctg cgtaggttt tccaacgtg gattatcaa tgttggatt tccaatgtag  
85741 gtaaatcaa tataggcggc tgtccgccg tggtagctgc ttccggctct cgcggctgc  
85801 gctgctgta tatgacgta tctgcgcc gcaagcgtc ctttcgtc cgctccggc  
85861 tgcgcacgat atatccgct tttcagatt ctttaccgc ttcgaggat gcgtcatct  
85921 tctccggtt gatatggat aagcccga gggataatc ccaatctc ggcagcga  
85981 gcattgca caacaagccc tttcctta aggacaattc ctgtttcgc aagtgggtg  
86041 tgctcataac ggtatatccc gtattcgt ccactctgaa aactgccata tttcctcact  
86101 tctctctg gatgctgg acaattagaa agccgtttc ggctgtttg gtattgcaat  
86161 atgcccttg ccgtttcgc gtctgaaag ccgcatggca caaggcctt tgcccgtca  
86221 tttgtccat ctggcgtgc tttccgct cttttgccc gggcaatagg gacactctt  
86281 gaaaacgca aactcatatt tccaccggg gcgtagaaa cggcaagtgc cgcaatctc  
86341 atcatctcc gcacaaccg attgatagc gtaaatccc ggctctgct gcatgagca  
86401 ttcaaacgcc cgctgctg cttttgtaa atacattcc gctgcacct ctttctcgc  
86461 ggcaatcag taggaggcg tgattaacc ccgtcctc acaccaccg gctaccgtt  
86521 cgttacacg cggtttcaac agttgacgt cacagactga taagctatg ctaaatcata  
86581 aaagccact cttatcagc tttctttg cattgccata tttaccgta ccgtttcgt  
86641 ggtaaacca tctctctc ggctgttcc tgctccat gccaatct ccggcactcc  
86701 cattttcgc agttctca cttggttct cgtttctc cattgttcc atatacat  
86761 tcggattct tggtatagc acttattgag ttctctatt cgttctca tttccgcaat  
86821 cccgtaataa ttcagccag cacacatata cactttatc tttgtaatg caggcgtat  
86881 gctctgaact gacctcgg aactaagtt ttcagctt gactcatt tttccatga  
86941 cttccatga accggacat atatgccct tccgttctt ccaatgaa agccaaggaa  
87001 tttaaaagt cggattgca acacgctgac tacacggct ttctctggt tcaattca  
87061 ttcagcggc cttccagat attcgtgct cgtctcagc agtctctg cagctctc  
87121 gttttcgc agcagcagc tctcgtccg gtaacggaca aatacaact cagctctc  
87181 atactctg tcaactcat tcagatagat gttgcccag aggggggaaa gatttctc  
87241 ttgcggcga cttctctg tttcatgac tactccgtt tcatcacgc cactttaa  
87301 gtacctta atccactgga ttacccttc gtcctaca tttctcgc gcatattcag  
87361 gagtatctc tggctcagg tatcaaagta ttcgacaag tcaatgta ccgcatggat  
87421 atatccccg tctcactc cttcacct ctgaatggca tttctcgc ttttccgg  
87481 gcgataacc taactgtct ccgagaaca cggtcgtg accggtgta ggcgctgtg  
87541 tatggctgt tggaaatgc ggtctttac ggttgaata cctagcttc gtattccg  
87601 gtctggctt ggaatctca ctgcttac cgggtcggg gtgtacttc ccttctgat

87661 tctctcgata agttcttct ggtttccct caggtatgcg cctatttct ccacggtaat  
87721 cccgtcgatt cctggcgctc cttgtttgc cttactctc ttaaagctc tgtgaggt  
87781 gcccttctcc agtatctct ccaagagttc cggctgtgca ctgtccctt cttccatat  
87841 ccggcggaaa gaacggtgcg ctctcacata cccttcacgt tccgcgctat ctctttgcga  
87901 gcagctatct ttgtttctg tacccaatgt tcttctcc tttccagtt gtactaaaga  
87961 ctctgttga ttcggtcctt catctctga ctactacgac ctggctgac ttctgtacgt  
88021 tcagcactat ctttcgataa tggttatccc tttcaggaca ttccgcacag acctccccg  
88081 gtaccacag tctttctc tccatctatc tgccacatt accatacgtg attccgtgtg  
88141 gttattgggc ttcgacttgt tcagcagcct taccctcag catggcctga tgtgattct  
88201 gtccgtcaga ccagagattt gcccatgggt tagtatgttc cccacatccg gcttcctca  
88261 gattcacct cacgatgaac accttgcct tcagctatat cttcccacc accgggcgga  
88321 tccggactt tcaccggtta gagacgtgcg ccgccggcg cactaaaaa acggcgttac  
88381 ttttcccc aaaggggta aggtaacgcc gttgtgtgc gtattcagtt ttaacacat  
88441 tccctgtcta tccgctgtcc gcaaacctat tgatttatt agcttttgc cgctatcgt  
88501 atcacctc attatttggc atccaggta taacttaat tccattgat tattcttact  
88561 tctcaatcca gcaataaag gtactgacct tttcgagatc ctctcattc atggttctca  
88621 gttctcgca taattcacga tacggggtt ttgcatcgtc cagtggagcg aaaaattctg  
88681 ccggtgtcat atcaaaatc gagatgat tgaacagttc cctgagagac ggcaaggccg  
88741 ctccgctggt tataccacga atgtatgagc cactcttgc caaatcaaa ctcatctgt  
88801 gttcggaaat attcttggc attctcagtt cagtaattct gatacgaata aattcatcat  
88861 actgctgtt ggccacttct gtccctcct cctcaattat tgtagtatga attggaaggc  
88921 agtgttgga gcaagaaaat gaatttgc tttatcctt cttgtattgg tgatataatt  
88981 accaatatcg ggtttgatt ggcgatacca gtatgaagta tctcaaagg agagatttt  
89041 atgaattat tcgctgtcag tttcttggc cacagagaag ttgatgatcc gttgtgatt  
89101 gaacgacaat tagaagcaat catccgtgag ctgcttctg ccaagaata tgccgagttc  
89161 ctttagggc gagacggaga attgaccag cttgttcat caacgatccg cagatgcaag  
89221 cgaacgatcc gggatgacaa cagttctctc gttctgtac tgccatata gacggcagaa  
89281 taccggaaca atgaacagtc atttatgag tattatgatg aaatcgaat ctgtgtcga  
89341 tccgcagaaa aacttcaa gtccgccc atcagtcagaa atcggtcct gttgaccgt  
89401 tcggatttgg ttatttctg tctgaacac gattctggcg gagcttca gaccatgca  
89461 tatgcaaaaa aggcagggc aaagattatg aatctgccag atgtacctg ttgacttgc  
89521 cattatttt ctggaaagg aagaacatga ataaaaaga acgaatagcc atttattg  
89581 ctgtcattat tgttggca gttggaatta ttattgctgt gacttccat cagaaaaagg  
89641 aatggactt cgataaatt gctgaccgtt ttgaaaagag cgcagaaga gttctggag  
89701 aagatgtaa gaaggtctcc aaaacagaac tcgcagccac acttacctac ggagatcaaa  
89761 acgacaagga taataacatt tactaccgta tcctaaaac cacctttac gagggagacc  
89821 cggcagaaat caccgatta catacgaag ccctgggagc gctttccc gttgacagta  
89881 tggacagctg tgaggaaatg atgattcagg actggcccgg cgctctatat aagaaggcg  
89941 acacggcatt tctgtctgg acgtattctc cagaagttac ttatgttctg gaatacact  
90001 caagcaaat tgatgattca gaaattatca aatggcaa aagtgccgaa ctttagatg  
90061 aagaataat gtaaagagc cagactgtc actcacatct aatggagcaa tagcgggtgc  
90121 tcttcttaa ccatactatc tatattgtc ttttagttt tcccccaag accacatggc  
90181 atccagaatg ggttttagac tgtaccctaa ttcggttaat gtatactca cagaggcgg  
90241 cacttctgca taaactttc ggtttaccag tccgcttgc tccatctc gaagctgagc

90301 agtcagaacc tttgagata catgaccgat tgatttttt aattaccaa agcgtttggt  
90361 accaggcatc agatcacgca ggattaaaac ttccattta tccccgatca gcgttaaagt  
90421 tgtttccacc gggcaagccg gcaaatcttt ttcaaagaa acggtcgttt tctgctcatc  
90481 cattgtatta cctccaatag tttctttta gtaactacgg cacaatattg tgcttacttt  
90541 acgaattatc cttacagcgc tattataata tcagcgaaag aaaaaagcaa tctttccaaa  
90601 gaaagcattc aggaggtaat caccatgaac aaagtcgttg aatttttaca ggcaaacctt  
90661 gtccagtatc ttgctaccgt tggctgtgat ggcaaggcca aatgccgtcc tttcatgttc  
90721 tgctttgagc aggacggaaa gctgtggttc tgcaccaaca acaccaagga cgtttacaag  
90781 gatatgcagg aaaaatcccta tgtggaggtt tctgtatcca gtcccagcta tgaatggatt  
90841 cgtctgagtg gcaaggcagt gtttgaanaac aacatggctg tgaaggaagg ctgcatgaac  
90901 aaccgattg tcaaaggta gtaccagact gccgataacc ctatcttca ggtgttctat  
90961 ctggaagatc cccacggcgt gattgccgac ttctccgga atctcctta cgatttcaa  
91021 gaagaaccga aaacaataat cttcggggca aggtgaaatt cctgaccggc agtaaaagcc  
91081 tgcgagcaga aacgctgatg cggtagacatt ccgtagccga cggtagatc cggatgaaag  
91141 aagatgtgat aaggcttacc ccgcatatga taaatccatc tgcgggggtt tgtcttaaat  
91201 ccaaatcata tctctcaagg agaattatgc gtaacgttac caatgcaaaa atttctgttc  
91261 gcaccattac catgactgca ctctgtctg cgattgccta tattcttga ttcgtagagt  
91321 tcccgattcc tctgtcgcca gctttgcc gaatggattt ctctgattt ccagcttga  
91381 tcggagcctt tgctttggg ccaatagttg gtacactgat tgagcttga aagaatacat  
91441 tgcagcttct tccacctcc acaggaggaa tcggagaatt tgcaaaactt ctcatgggag  
91501 catctttgt tttactgcc ggattgattt atcaatatca taaaagaaa aaaggtgat  
91561 ggattgccgg gattgtcggc agtatttga tgggaatcgt agccgctgct gcaaaactt  
91621 ttattctct tccattatt gaacagtta tgcctctgga acagttgatt gctacttta  
91681 gagaattat tccattatc catacacaac tggatgtgtt tcttataat gcgttcctt  
91741 tcaatttct gaaagggctt gtaatcagtt ctgttacgat gtagtctat aaaaggctgc  
91801 gccagtggt aaaaggtgag gctgaaagg aggggtccga aatggaaagc aataaatatt  
91861 tgtctatct cgttgaagaa atacacacca ccgtagtcgc aacagtagat gattcgggtt  
91921 tgccggttac agctgcgatt gatagatgg atgctgatga aaacgggtt tattttctga  
91981 ccgcaaaggg gaagggttc tatgacaggc tgaaaaagcg tggggcttg gcttgaccg  
92041 gcatgaaggg cgaagacacc atgactgagc ctgctcttc tattcgggga aaggtcggg  
92101 aattaggcag tgagtttct ccagactgt ttgaaaaaa tcctatatg aatgaaat  
92161 atccggatgc agcgtccaga aatgcgttga ccgttttgt catttacgaa ggaagcggg  
92221 aatggttga cctgtccaaa aagccgattg agcgtgccag cttactttt ggcagcgcag  
92281 aggaagtgcg ggaaggttat ttatcacag atgctgtat cggttgcaag ctctgctatt  
92341 ccaaatgtcc tcaaagggtc attgatatt ccgaaaagcc tgcggtcatt catcaggaaa  
92401 attgctgca ttgcggtaac tgctatgaga tctgtccagc cagagctatt gtgaaacggg  
92461 gataatgtca tgaatcaaga cgatagaaga agattttta ttgaagaact gttacgagaa  
92521 cgtccttct gccgccgta ggagataccg gaagaaccag acttcagaa gatgctgtg  
92581 cgtgggctaa tgaatgtccg gcagccgagc gttgtcagcc gtcacttct ggaagtacag  
92641 gacgcctatc tgcaggaaga agtaaagaga aaaggaatta cccggctgtc cgatctgtca  
92701 ccgatacagg atagcatcta ctttggcgt ggagatatta cttgctgga atgcggagca  
92761 atcgtcaatg cggccaacag cggtatgact ggctgttacc aacctgcca caactgtatt  
92821 gacaactgta tccataccta tgccgggctt caactcgc tgaatgtgc tgagatcatg  
92881 gaacagcagg gctatgaaga acccaccgga caggcaaaaa tcacgcctgc ttataacctt

92941 ccctgcaatt atgtcattca cacggtaggt cccatcgtgc ggggagaatt gacacggcag  
93001 cactgtgaac tttgaattc ctgctatcgt tctgtctgg aactggcgga caaaaacggc  
93061 gtgggtagta ttgcgttctg ctgtatctcc accggtgttt ttatgttccc aatgacaag  
93121 gcagcggaga ttgctgtgcg aactgtgcgg gaatataaga agaaaaccgg aagcaggatc  
93181 gaggtgatat ttaatgtttt caaagaacag gatgaacgaa tttacagaga actgtctcag  
93241 acagattgac cgtctgaagc aggtgctggg aacagcggat gctgtcctga ttggtgccgg  
93301 tgcgggggta tctgcctccg caggacttac ttatagcgga gagcgttttg aacgctattt  
93361 ttcggatttt catcagagat atggaatcac tgatattgac tccggcggtt tttatccta  
93421 tgacacgctg gaagaatatt gggcatggg gagccgtcat atttttaca accgctatgc  
93481 ggatgcacct gtaccagat atcaggtgct tctgtcactg gtgaaaaaca aagattattt  
93541 tgtgctgacc acaaatgtgg atcatcagtt tcagaaagcc ggctttgaca aacagcgatt  
93601 gttttataca caggagact atggcttgg gcaatgctca aaggcttgc ataataaac  
93661 gtatgacaat gaatcttctg tccgtcggat ggtagaacag cagcaggata tgaatatcc  
93721 gtcagaattg attccccatt gtccggtatg cggagcgcca atgataatga atctcagatg  
93781 cgatgatact ttcgtacagg atgagggatg gtatgccgcc gcagaacgat attctgactt  
93841 tgtaaagcag cataggagcg gaaaaatctt gtatctggag ttaggtgttg ggaataatac  
93901 gccagccatt attaaatc cttctggcg tatgactctg caaaatccga acgcaatta  
93961 tgcgagcatc aatctgaaa atatgatgat tctcaaatt gaaaatcagt ccattttaa  
94021 aaacatggat attgcttccg ctgtgaaaag gctgtcccaa aaggaatgaa tattgtcaaa  
94081 aatagcaaaa agacgccacg atctacactc caatcggagc atagaccgtg gcattttgat  
94141 ttaccggaga ggtttctttt cctcttttc ctgttctttt ttcttgcga tattcagaat  
94201 cgtttcaacc gtctgcttgg cgatcagata ttctgcatt tctttctca cctgacggta  
94261 ctccgcatag gcttgtttt tctcaatcag gagccgggta aactcctcat gcagaacctg  
94321 acgggaagga acctttttc catccagctg gtcaaaggct tgcttcgccg ctttatgcag  
94381 catcagctca tcacgatgtt ctcaaaaaa cgttttgctg taccggact tgcgatacgc  
94441 ttcgtaggtc tttctgttct tggagtaatt gttgatgtgg gtctgcaatg ctccaatctc  
94501 aaccattcgt ttctcagcca cttaatgga atcggaaagt tcagagaatc gagtggctcag  
94561 cttgtctgtg agagcgacca agtctcata gctgtccaca ctttttctt tcagaaggca  
94621 gactgtcctg gcagcttctt tacggttcta tttcttggc cacttctcat agccaacaga  
94681 ttttcttcc gccatcttgg actgaatc aatgagaagg tggaaactgct tctgttcagg  
94741 agcctcccg aaaccacct tagactgtg caggctttc ccggagataa cggcacggag  
94801 ttcttctca ctgtatccct cgcaagaga acgcagacga ataaaccgct tctgttctt  
94861 tcccgaaac gctggctgt ttcatcctt atactcgaat cccatatcag caagagcctg  
94921 aacgaaattc tcaaaactct tgggcttctc tttgagtacc gagtcgatag cttcacaag  
94981 cctgcacgc tgggttgcct ttttgggaa aaccgtccgt tctgacgct cccggtaggg  
95041 cttcggcgtg ataatgaaa gtccatgctc gcacaaaaca cggctactca gtttctgtac  
95101 tgccagcccg gaaaggaaga agttattgaa cttccgggag caatcaacgg aagtagaatt  
95161 ataatgata tgattgtgta tatgggcttt gtcaatgtgg gttgccaca taaaagcgtg  
95221 ttacccttc gtccagcga tcgccgtctc atagccaacc tgatttgctt cttccggtg  
95281 tatttcttc ggcttaaaag attggcgaat ctgataagcg atgatattgt tcttctgctg  
95341 tctgccgtg atgtctgat atggcgttt ggaaagcaga aattcctcat cagcagtctt  
95401 gggatcacat tcataggaac tgataaattc gccgttgttg gtctttgctg cgttttggga  
95461 gtagtcggta cgatcagcca gacactgagc aaccgatttg cttttgtta catggagtgc  
95521 aatcagcctt gtagctgcca ttattcacc gtccttccg aaagaaaaag ccaccgtag

95581 gtgacttct caaaattatc taagcatctt ttccgatct tccgcaccac gcagatatgc  
95641 cagttttacc agatgcagct gaagggata caggctgttt atggtgtgtt cgcattgttc  
95701 ccaaagggt gtattcgatt ttccacgat accagccaaa gtatgaacag cttcatctgc  
95761 cacacttgc agttctgcat accgttcac atttccggca atctctccga tggcatcatt  
95821 aaaagtaaca tcaaagtaat gtcataaaa tctctgtcc atccgtttct cccatcttaa  
95881 taacaaataa attccttgat atgatttccc aaagtttcaa gttttacaac cgccatacc  
95941 aacagaaaga ttataaggat tgccgtaat cccataccgg caaggatagc cagggaagtc  
96001 cacagtgcct ttacgatgca gtagatggag cagcctgcaa tcaccaggag caacagagcg  
96061 atcacataag aggaaatgtt ggtgatcaga tttccgagga tacaagcaac agttacaatg  
96121 aacaacaacg gcagtgcaa tactttcaat actatcttca taggaacaac ccctttctt  
96181 tgaccatatt gtacattgag aagtgcgaa ctgcaatgat gtcaccacct atgtaacagc  
96241 caaaaagcgt tgagcataaa aaagggcgca ctggctattt gtgaaccaat gcgtcccgtt  
96301 caatctgttt tcagttcgac aaactgaaat ttgagtctct gtaaaactgg aattaacca  
96361 tacaattatt ttaattaat ggctactgaa caatagccca ttttcggcg ggcacgaaaa  
96421 tagccagcag atatgtaagc agcttcaaaa agacgactg aatcttgagg agattcagca  
96481 caaaacgga catagcaatc acatgggagc cggttccc cagttttgc gtcaccagcc  
96541 ccatgccgca tttgcgctc gccaagctaa atctgcgctc cacttctaca cgctcacat  
96601 catcccgta atctctgcc ttatctctgg ttcgccctt cttggggcga cccagtgccg  
96661 gaccggatag ccgattccg tgttcttgc aataactgag attctcacgg tttcggtaga  
96721 tctgtccgc cagaatgcgg ctgggataat gccctccc ctcccgaac cgttccgta  
96781 tctctgcag attcccggct tcattgtaag catcaaagga acagcattcc aaccgtgtcc  
96841 accatccac aacctgatg tccaacttcg caccaaactc cactggcttt ccaactttc  
96901 cccgtacaat gggacgaacg aagggtgac ttatactgac aattcggta gacacgctgt  
96961 ggggtcgggt atcgtacatg tacttctgct gttcatagat ggtgcggatc gtatccagac  
97021 gttccatctg tcgcgtggtc agagatttcc caagggcag tttgcatct atggcatcga  
97081 ggtcacgtcg gagataagtc agctgtttc caattgctt gcgggtcatc ttgacggat  
97141 gcttgcggca tctgtgat ttacagtaat cttccgggc acgctggcg taagtccggg  
97201 gcttctccc atctgcggga tcatggagaa catccagaat cttctcggca ttctctctgg  
97261 cctcattgag cagagaaacg tctgggggt aacggatatt ggacggtgca caggtggcgt  
97321 ccacgatcat tgtccgctg tttccgag ctctgggtg gtcacagag tcatcattgt  
97381 cgtcctcgga ttctgcatc tttgcctgac gtccttgc gtcccacag atcatctcat  
97441 tgatctcacc cagaacttcc ggcgtcaacc gcttgcggaa atacaccatc agggatggat  
97501 caaagggcag ctttctgca tcatagccgg gataccaca gaagtactga agatacgggt  
97561 tctctggat ctgaagtga gtctctctg cggagtagcc atactccgc tgaatgatc  
97621 aggcgcccag ggccagccg agtggtttg ctacattacc tttgcggtg gtaaacagag  
97681 cggcgtaccg ctttcaatc tccagccagg ggatcgtctg ggctttctt accaacggt  
97741 tgctttctt tagattcatg cccactggct gtttgaatc cgccaagctg atctgacat  
97801 tgctgtaacg atacatagct gtctccaag tgcaaggctt ttgctgatt cttgcgttt  
97861 tcgatactt tattatatca cgaatcagcc tcaacagctt gactgcaag gattttcaa  
97921 ttattcagca gacattaatt tagatattca caatattact tgccacagta tctcgaaaaa  
97981 cattatcatg ttctaccagg agcatggtc gggcaaactc cgttatgagc tgttcaatc  
98041 gcatactgta gtacacatca ataaagtga gcggttcatc ccatacatc aagtgtgct  
98101 tttcaaaaag gcttttgc attaggactt tttctttt cccgccagaa aagtcttaa  
98161 tatctttt aaactgtaca cgctcaaagt ctttttct aagaagtgc ttgaacagac

98221 tttcatcaag gttgttttct tctgcaaact cggaaagggt tccacataaa tacgatgtat  
98281 cctgtggcac ataagaaatt acaagcccag agccaagtgt tactgtacc gtataatcta  
98341 tggactgcc gactaccaac ttaataggc tactttgcc actgccgttc tcccgtcaa  
98401 gcacaatcgc ttccctgt cttatttcaa acgaaacggg ttcacaaact gaaatgccat  
98461 catacaaac tactacattc gataatgatg caatcaaadc tgtatggtaa ttaagcggtt  
98521 gtatcttgag tgcttctgcg gttccacat tttcagcaa tgctgatttt gttcgattg  
98581 tctgtgttg tctgcttct atagatttg aacgcttcat cttttggcg gctttatgac  
98641 cgacataacc tttatctgct gcccattt tggaagcttc tacacgttca gaccatactg  
98701 cagagcgttt tgccgactgc tgtaatcgtc tgatgtcctt tgcaaactc tcgttctgag  
98761 ccagttcaaa ttctgtctgt cgctcaaat ttgacatcca tgatgaaaag tttcctctt  
98821 gcacttcgat atctgctcgg ttaatcgata gaatatggc aacacaatcg tcaagaaagc  
98881 gacgatcgtg agaaactaag atgaatcct ttttctttt cagatatgct gccacactt  
98941 ttctcgttt ggcaccaaaa tggttgtag gttcatcaat cagtaggaaa tgccttcat  
99001 taagaaaaag agcggcaagc aaaactttg tctgctctcc gttggaaagt gttcaaaaag  
99061 gtcgcaaaag cacatcgaca tcaacatcaa gataagaaag ttctcgata agttccatt  
99121 cttccgcaag tgggcaaac tctgcaata tatctctgt aatacgttc ttatctgaaa  
99181 cgggataagg aaaataatca aactgtacgg atgataggat tttccgcta tactcatatt  
99241 tccaagcag aagattcaga aaggtgttt tacctcgtcc gtttctgcc acaaaacaa  
99301 gttccaatc ggtatcaacc tggaaactga cttttcaaa aacattatca taactgtcg  
99361 gatatgaaaa cgtaagggtt tcaatttaa tcattgacat aatattatc ctcctttgcg  
99421 tgtcatcaga tacaagtcg gttcggtaga tgtttactcc gtatagatt caccaaaagg  
99481 aaccgacct atacggagt aatcatgtgt aactatctgt tctgactat tcataagca  
99541 cctcaaaaac aaaataagag ccgcaagaaa gtttatcctt gcagctcgtc atagcataat  
99601 aacaccacta agcaaaagt gcaacagcac tatattgagt aagatagaca tataactttc  
99661 ttgcaataga cacaataatg ccaaagtata gcactaccgc atattttgat tttattgca  
99721 agaaaagtta atcatcttc cacctcttc taaatttcaa aacattatac cataaatcgc  
99781 aggcaaatc aagtgggtac aagaattaa caaatcgtt ataatacat catataactt  
99841 tactcattcc ttactaccg taaaattcaa agtttctgt ccctataaaa ttagtattc  
99901 gggatttacc aaattgcaa acaacgattg atcgaactat caagttctct actgcatg  
99961 attatgac atggataga ataattctac cagctaaaca cgggtgttt tcctatgta  
100021 aagccgactg caaaactcgc acttccgcac aaattatcgg attactgaat ggaggacaac  
100081 ctgacaagga cttcttcat gtccgtccag atttctcca gacgttctg caagtcctta  
100141 atgtcggctt catagatgtt gccggtctca ttggctcgtt ttgcgtactg atcaggttg  
100201 ttggaacaga ttcgagaag cgaaccagt gctttacat cctgcaatc cagattgata  
100261 cagtagccgt ccagagccat ttttctcaga tatgccccca tactgaggat accaagctc  
100321 tccatcttct gatggattcg ctgacctc tccttgatg ccaggaaatg aacatcctgg  
100381 tctcgtttg ccattacaac acctctcgt agccctcaga gcgttttcc ggcgggat  
100441 gctcggactt agattcaga tcagccagaa cagaggggcg ttccgcttct cttttctg  
100501 cacggcttc caccgtgccc tccatattga gtgccgcatc cagctccgca agccgctgac  
100561 ttttggcac aagttccgt tctggggga atggtttcc aagttctgct tttgcccgtt  
100621 cctgctgatt gtagagattg gtcagttgtt cattggctct ttccaaccgc tcaggaatgc  
100681 cagaaagtgc gttatccagt cgggtgatat tcccctggc atccgtgcca agtgctacac  
100741 ggtggctcat agccccttc agaacgatg caaactcact tcggaagctg tcataggaaa  
100801 gctccatccg gaaactcgg tagctgccc acggaaccg atcagcactt tttgtctct



100861 tgcaaggcgc aagaatgatt tcaccggcat cggcttttc cgcataatgt ctgccatga  
100921 tttcatacc acagaatccc tcggagatct gcggatgtgc ctccacggtc ttgatgtccg  
100981 cttcaaagcc atggatatag cctgcctgct tttcaatctc agccgggaag tatttcagga  
101041 gcttatctc catgcggtac tgctggctct ggtggtcagc tttcagcact ttcagccttg  
101101 ctacatcaat atccaagtcc atcttttct tgatgagcgg attaccggcg cacagtgcct  
101161 tgatctccgc ataggagagt gcctgctcat ccacatcgtc acaggaacga accggagatt  
101221 tggaggatcat gatctgagag ataaatttct gcttattctc cagggtctga tacagatag  
101281 cgtcgaatgt tccctcagtc acatactgat agacctaac ctctttattc tgattgccct  
101341 gacggatgat acgaccgtt ctctgggtca tctcggacgg acgccagccc acatccagat  
101401 gatgaaccgc caccagttg tctgcacat tggttctgc gccattttc tgtgtgctgc  
101461 caagcagcac acgcacctgt ccggtacgaa ccttgcaaa gattctttc tttttgctt  
101521 cagtatccgc atcgtggata aaggcaactt cctcggcagg tacaccgtt gccatcagct  
101581 tggttttgat gtcgtcatag acattgaagg tgccatcgtt ttttgggtgc gaaaggctgc  
101641 agaacaataa ctgtgtcagc ttgtctgcct gaccttctg ccagatacgg aggacattc  
101701 ccacacaggc attgagcttg ctgttcgggt catccggcaa cagtgggttc atcagccgct  
101761 gatccagtc cagcttccgt ccatcgtcgg taatcttgag catattgtcc acagacgggt  
101821 caatcatacc ggcatgaaca tccgagctc tttcgaaag ggaagcaacc atatcttct  
101881 gatactcaga gggctgcacc acaatcgtct caaatttgc ttcgggaacc ggaagatgca  
101941 gctggctga ggtcttgatg tcggctactt cctgaacat attcatcagt tcaggaaggt  
102001 tgaagaactt ggcaatcgg gttctggcac gatagccggt tccttcagga gccagctcaa  
102061 tggccgtcgt tgtctcgcca aagggtgatg cccaggaatc gaaatgagtc agattttct  
102121 tctggagcgt accgtactgg agatagcga tgaccgtgta aagctcagtc atggagtgc  
102181 tgaccggagt gccggtggcg aagataacgc cacgaccgc ggtgatctcg tccatatagc  
102241 ggcatctcat aacatatcc gaagatttct gggcttcgga ggtggagaga cctgccacgt  
102301 tcctcattt tgtgtagagg aacaggtttt tgaacgatg gctctcgtcc acgaacagcc  
102361 ggtcaacacc caactgttca aatgtgatga catcatcctt tctgtcggcg gcaagaagtt  
102421 tatccagtct ggcttcaga gattttctgg ttttctcat ctgcttgatg gtaaaattct  
102481 cgccacgctg atatttcagt tctgcgattg cacctcgtat ctcatcaatc tgttctgca  
102541 actgccgttc ctgccgctcg gcagacagcg gaatcttctc aaactggctg tgaccgatga  
102601 taacggcatc atagtcgccc gttgcaatac gagcgcagaa cttcttccg tttgcggtt  
102661 caaaatctt cttctggca acaaggagct tggcgtcgg atagagggtg aggaactcat  
102721 ttcccactg caaggtgagg tggttcgaa ccacaaacat ggacttctga ctcaggccaa  
102781 gtcgtttgct ctccatcgt gacgctgcca tttcaaagg tttgcccgca ccaactcgt  
102841 gtgcgagcag ggtatttcca ccataaagca catgagcgt agcgttctc tgatgttcc  
102901 ggagggtaat gtccgggttc ataccgccga agcggatag gctgccatca tactcacggg  
102961 gcctgggtga gttaaaaagc tcattgtact tcgtaaccag tgcttcccgg cggcgagggt  
103021 ctttcaaac ccaatcctga aacgatcct tgattgcctg ctgtttctg tgtgccagag  
103081 tggtttctt tttattcagg acacgcttct gcttccgtc cgcattctc atggtgtcat  
103141 agatacgaat gtcttccagg ttcagtgtt cttccagaat ccgataggca ttggcacggt  
103201 cagtaccgta ggtcacatat gccccacat cattgtagct gggagagctt tcccattga  
103261 tacgccactc tgcggtcatt tcggagaatt tcacctcaat ggaacggcgc aggtagtatg  
103321 gggtctcaa ggtttctcc atgaactgct gaatatagtc tgcacatc catgtggcac  
103381 ccagacggac atcaatctca gacgatcca aatcctcgg ctgtgcctt tgcatgcct  
103441 ccacattgat attgaaagc gaatcacggt tcgccgcat ctgtcagata cgacgttgc

103501 ttctcacatc accagaaagg tattcgtccg cagtctgcca accagcttc acatcatcag  
103561 gtgccatcgg gtctttgaag atcacccac gcagttccgt ttgaatggct tcgtaatcct  
103621 cctgggttcc caaaagctgt gccatgaaag gaagatcaac tttaccacgc tcaccaatag  
103681 agattgccag agcctccgat ggggtatcca cgctggtcac tttgcgttcc ggcttgatcg  
103741 ttctcttggg gaacatatcc gccttgctct ttaagttgcc gtcctcatcc acattttcca  
103801 gagaacacag aaggtaatag gaggaatcat cagagaaagc ctgcccattt gcacggttgt  
103861 tgatgagacc gttctttgcg gtaaacgcat cgtaggcac attcagtctt gcctgcttct  
103921 gagaaatcat ctatccggg taatcctcca gctgatattc gatcagctca ttgacgatac  
103981 cacggagttc caccatgcct ttcacacggt cttttgcttt ctcgttcagc tccacatggc  
104041 gcatgatgga gttttcacgg aagtacactt cgccgtccac tacggcatag gaatagttct  
104101 ttacatctgg agtagctgga atggtttccg cttccttgcc cttgctgttt tcaaccggca  
104161 gctccacggc ctgatagggt cctgaaatgt gggaaaccgc ctctttcaga agatcggaca  
104221 gctccgcacc cggaatcgga cggacggtaa tatcatcctt gccgtaaggg gtactttcca  
104281 gaaccgtgic gcccagaacc atttccgggt gatcgacaaa gtagctgttc atggtgtgic  
104341 cttcttcagt gcggttcaga tgcaccaat caggaacgat gtcaatcgga tggtcacgct  
104401 tttgcaggaa gatgatgtcg gacacgactt ccgtaccggc atttttctta aaggcatcgt  
104461 ttggcagacg aatggcacca agcagttccg ccctctgtgc cagataccgc cttgcatccg  
104521 agttcttggg atccatggta taacggcttg ttacaaaagc gaccacgccg ccaggacgaa  
104581 cctgatccag agctttggca aagaaatagt tgtggatgga gaatcccaac ttatcataag  
104641 gcttatcgga tacctttagt ttaccgaaag gtacattgcc cacagccaga tcgtagaagt  
104701 ctctgcggtc tgtcgtttca aaaccggcga ctttgattc tgcgttggga tagagcttct  
104761 gagcgattct tccggtgatg gaatccagct ccacaccata cagacggctg ctctgcatct  
104821 cagggggcag cataccgaag aagttaccga taccatggc aggttcaga atgttgccg  
104881 tctcaaagcc catctggccg actgcatcgt agatggagcg aatgaccgta ggactggat  
104941 agtgggcatt cagggtgga gcccctgcc cagcatattc atcctcggac agcagatttt  
105001 tcagcgtggt gtactctgc gcccaattc cttatcagg gtcaaaggca tctgccagac  
105061 cgcccagcc gacatagttc gacaagatct cctgttcttc gggagtagcg tttcgttct  
105121 cgctctccag ctggaacagg gtcttgatgg cttccatatt tcttaciaat ttctgtttcg  
105181 gtccacctc accgatgtgg tcatctgtga tgtggaagt caccgacgga acgggtgga  
105241 cttctctggt cgtaatggac tgctcaatct gagcagatg gtcgatgacc tcaggattct  
105301 gccagccgic caccttgga tagtcccga cgatgggtgc ctgaccgtcc ctgcaatgaa  
105361 tgaggtaac actgcccgg aacggtcgcc cggatattcat tgcaccaga gcctttgct  
105421 ggggtggaagg gagggcgtga taggctctca gggcatcttc aaaggaactg tattcctaa  
105481 tgtccagcgc accacgcttc tggatgtcct ctgctacata gaagtggta atgaagtgt  
105541 cctgctgtac cgttcggca atgcatata cctgtgcctg tgcctttca tcaggatagt  
105601 caccatagat acggatgcac ttatgtcct gctgatcga aacggcagca ccgtcact  
105661 tgaaccgic atcctcata gttccgtca catagccctg ggcagctttt tcggcttct  
105721 ccagagtga gtaatccagt ttatcatcaa agccgtttc aaagtatga taagcggca  
105781 ccagataac agttccggc tgtgctgtt cgggtcggat ttcgccctga ttttccctg  
105841 taacggagtt ttttcggta taggcatcac ccctactgc atggttctt tcgtcctgag  
105901 aaagcaaagc ctgaaattc tcacggctt ctgcacggaa gatcggataa agcagagagg  
105961 ggtctctcag ctgcacttc cggtcggta tctgctccac aagaaaagcg gtgtcgtcca  
106021 gatagaccgt atctcaacc tgataattc acaccggtt ttctcaacc ggctctgca  
106081 tattatctgc ggattcttc ggctgtact cttccatcgc cgccacagtc tgacggactt

106141 cctccagga gtcattggca agccactcat cgtcgaagta ttccgtaacg ccctcatggt  
106201 ctacatagta ggttccggtc tgttcgtccc agatggcata ctgcatcc tcggtatcga  
106261 ccacagcaaa acgctcatag acatcttcca gaggatttgt tttggcatct tcgattgcct  
106321 gccgctcggc ttctctca ggggtaagaa agcgaccttt tttcatcaga gcatcaattc  
106381 tctgtgccac ctgtgtccag gacatctgca cttatcgca gccgcttttg gtgtagcgaa  
106441 cgcccttggc atcgtgatcc tgaccgctgt gggttgcacc ggaacaggca tgggaatgac  
106501 cgccgggtcc gtattcatgc ttcagaaact cggctttgtc cttaacagaa tgattttct  
106561 gccaatattc atagatacgg cgctttccac cggcgaagcc gctgccacgg gtcaggctg  
106621 cattgacctc atcatcggta atgaactgac ggacaagggg catctgcatc atacgctct  
106681 gatattcctt gacaggggca tccagttcat tcaaccgctt tcaatgcca tccagcttgt  
106741 gataatgaaa gcgaagcaga gaacggctcag catcatgggc aatcataaac ccacgatact  
106801 cctctttcat tgccgctaaa aactcaggct gtttgagctg ttctgccagc catgcggtt  
106861 cttccgaaa accattgctg cggatttccg acaaagaggg gaagaatccc atgcttttg  
106921 cttcatcgga taggtcatgg taaagatacc aaatggactg agccatctt tcacgctcaa  
106981 agccgggagc ttccaccagt tccacattgg tagcgtactg accgttttcc agcaactctc  
107041 caatccgctt tgcgacatcc tcccatggga tgatctgcgc cctggggctg tcaatggcag  
107101 aggaacctt ggcaaggatga atgccgtccc cggaatacca tgcggaata ttgccgctgt  
107161 cctcctcag accaaaacca ccatggtaga cctgcttcaa ggtctgtgcg atttcttca  
107221 cggcttctg cttcatatag tccagcacta cgatttctt tgcacatcg gtattactgc  
107281 caagcaggag aaaatggtcg atttcttct gagaaaaaga aaaagcagag ggctttcggc  
107341 tctctgctt gtcgataaat cggatttctt gttcttctgt gaggaaaagg ttcagggtca  
107401 gctgttgata agctccgta tcacgatttc ctccgctgc gctttcaggc tgctcatgtg  
107461 tcttcccag cccagctgat ccgtctctt ctccgggtcc gggttcttct tcagatactg  
107521 gttcatcaga agttcactc tggctttcgc cgtctcctcg atctcccaca ggtgggggaa  
107581 caggctctcc gtcagaatca tgcgttcag gagcatcgga ttgttctgct ccagaaacgc  
107641 tctgcgatc ctgcatatt tgccaaagg tctgttttcc ttgttctca acctgatgtt  
107701 cgggattctg taatccccg cctgtctgta agtcatttcg ctcataatct gcgctcctt  
107761 cagcagctt gttctgctg tattcaccaa tcgcttctc gatctctga aacatccgtg  
107821 aactgattgc attgactgcc gtgccgaggg tgtttaccgt ctggcgggtg ttaaatcaa  
107881 agacattcag gaagtcctca tgctcgaagt agttatcagg gttctcaacc agtcggcagt  
107941 acatcgcata ggatacgtg tttgcaaccg ctctctttaa agccacttcg atgttaagtt  
108001 catcatact ctcaaggaag ctattggcaa cgatgtcgag gatcggctt ttgtaatct  
108061 cccaatact cgagaaaga gacagcgcaa tctctccag ctgctcctcc aacagtccat  
108121 ctgcccgaac gccaaaggaa cgctccatag cttccatcac atacgcacgg ttttctctg  
108181 tgacttcca cggttcagt tcaggggatg aacggcggac accagtatca gccacatcga  
108241 atacatacc cagatagggc ttatccctgt tggtcacaaa cagtgcgatg ccggtggaac  
108301 ctgctgac atatctcgg tacttctcgt cgttccactc gtcataaggc ttacagaagg  
108361 tggcattggg gcgctgggca taaatcatca cctgttccgg ataagtgaac tcatagttc  
108421 gggacatcgt taccagaaag gaagtccagt tctcttctt cgatgtgatt tttccgatgg  
108481 tctctctg caaccggaa taaatcgt ctttgcgtt catcatttc ctccaatct  
108541 taaaaatcag gataaagatt cagcctatca aaagtctcat catcatacc ggacaacta  
108601 ttgagaacag aatcagccag ggactaagc tcggcttct cctcggaaag ctgctcctc  
108661 atctgatga gtgcttgc caagcccgac tttgtccag ggctgtaaag catcatcaag  
108721 ttccgttcat cttgtgtgaa attcatcatt ccatatcct ttccgggtg cttctgggtg

108781 gtttgtgggg tgtatcgaac accgacattt cttcagctg ttccaacacg gaaggtcgat  
108841 cttccgcagc gggagccttc ccgttgtaa tgatgccatc caacatcca taatcgtcct  
108901 ccatagccat ctctgcattt ttcagatagt tttcgggttt cataaagtcc tgaagctcca  
108961 cgaaccgaa ggcacacg taataacagg atacttcacc ggcgaccttg agcgccacga  
109021 tgtcgtgac cgacatactg tgaccacgga agtcctccgg gtggtcaata ttgaacctgg  
109081 tataaagagc ttccagctgc tcggcagcac cggcggactg ctcaatcgga ccattgtaa  
109141 ccacctata atggcaatg gtcggctgat tttccagctt ctgaatgtgc caatagggca  
109201 taaaacgaaa ctctcggtc tcatcaatgt gttcagctg aaggactgag taagagtccg  
109261 tagagcttc cagaaacgct accattctgt catcggaagt ggtatttcca tgaacatcat  
109321 cccattttc aattttcata ggcgacctcc ttatcgttgc ggttccttgt acttatgcga  
109381 gggcgttga ggggcgattt tttccgtagc ctgcgcaat ttccataa cagattcttt  
109441 ccttgaggga gaatctacca caaccgctg cctgcaacc tcaaaagcct gttccatcac  
109501 atcttcatag accatggcac gaagtcctc gcgttcagg ccaaaggatt ccagaattc  
109561 ttttctggct tcgatcatag ttaaaccgg gttatccagc tgaccgcat ctatctcgt  
109621 gtagtttca tccaacagag tgtaatcgt gcatcctca caggctgca ccgaccagat  
109681 tctgtccga ccgaccttc atcggttc atcacctatg attcaggct ctgcatata  
109741 ggttgcgccc ttgcgtcca tgatttctgc gaactggcag atgtggaaca cattgtaacc  
109801 aacctgggta tggactcgt cgatgaattt gcagggttc acgacagttt catcgggata  
109861 gtgaatctgg acacagccac cgtccggaat acggaacaag tccttatagt ggctgtcaat  
109921 aatcggatg tccttgccgt ccgggttata ctattctc atttgcgtt tcctccgta  
109981 tcaaatcca tgtaaacct ggtcttccg tcctcgaata cctccatata gacctggca  
110041 tcaagggtg tccggctt agctgattt cagccttca ggttgattt cccagagcca  
110101 agcagtttct gtccgtggc actggtcatg ctctgcca tactctcga gtagcgggtg  
110161 tcttccaga gggcaactt gcagctcgg ttggaacaga aaaatgctt cgcttttct  
110221 tccacagaac tgccgagac agggcattc cccacggcat tgcttctt tgacatcaga  
110281 actttagat cctgaatgac ctgtaattc cgaatcagac cggcaatcac atcttgatc  
110341 tcatcataa aatcctcgt ggcgtatcg ctttctcga tgagcaacag ctttctcc  
110401 caatccgctg tcatagacgg ggactgaatc tgttcgggca tgactgttac cagagccgt  
110461 cccttgggg tcggaatcag atgcttagt ttctatcgc cttccgtc caggaaaccg  
110521 atacgacca gttttcgtat gataccgca cgggttgca gggttccag accttgcgt  
110581 tccacctcat cgggcatctc gtccgcccg gcagtttca tgctctcag gagcgtatct  
110641 tcggtgtagt gcttcggagg agaggtttt cctcctta tctcgtgct gatgacagcc  
110701 atttcatcgc caacggaac ggaagagagc acctgttct ttcgtcaga tttgtcga  
110761 ccacttttc tggcaagtgc ttccagcca ttatgcagga tggttttcc ctggcagag  
110821 aacgtgtg cggcgagtc cagttcaatg actgtctctg cgtatcggtg cggatctcc  
110881 acagccacga aaaggcgggt ggaatcaac tgcaaaatg caagctgcc cttgggcaac  
110941 tcattcagat tgcatttct caatttctg gtagggataa tggcatggtg gtctgtgacc  
111001 ttttgttat ccacaactg ctccgatgt acaggtactt tatccacacc tggggcgggg  
111061 aatgtgtgga aagccatatt tacgaggctt ggagattgt tgccatc gtctgtcagg  
111121 tatctgctg cggtagcagg ataagtacc agcttctt catagagggt ctgggtgtaa  
111181 tcaaggctt gctgtgccg atagcacaac acaggttgg catctctctg taaactggc  
111241 agatcgtaaa gcgaagggtg ctttcttctg gttccgctt tggaccgca  
111301 gcaatagaac aatcttctg gacagctcgc gcatccgact tcttttgaa gcgttcgctt  
111361 gctgccgtaa acctatccag tcaatctga accgtataga agggttccgg tttgaaagc

111421 gcaatggcag cttcacgcat gactgccatt gcaaggggtgg gagtcatgac tcgaccaaca  
111481 ttcagggctct gcccataaag ggtcgaaaaa agtcgagtag cattaatgcc aacaatccag  
111541 tcagctcgct ctgcacacag ggctgcttca tacaagcat catattcagt tccagacctg  
111601 agattttcaa agcctcccg gatagcggaa tttccatgg aagaaatcca aagccgctca  
111661 aagggctttc tgacccggc tttatggtag accagtcgga agatcagttc gccctcacga  
111721 ccggcatctg tcgcacacac aaggctggcg acatcatctc tggccatgag tttttcagg  
111781 ataccgaact gcttcttggg tccggaagaa acctcatacc gccagtccgc cggaagatc  
111841 ggcaggtcag catacgcca tttgctgtat tttacatcgt aggcttcggg ttgtgccagc  
111901 tccaccagat gaccgacaca ccagctgacc acatagccgt ttccttcaag gtagccatct  
111961 tcacgcttgt ttgccccaa cacctttgcg atactctggg cgactgaggg tttctcagcc  
112021 aatactaatt tcattcgcac ctgctcctt ccaaaaaat aagcagccac acaccgtagt  
112081 gcatgactgc tatgtatgaa acttatttaa tgtattgtct cagtatttct ttctcgttc  
112141 cgattatcaa atgacttgat gatctggcta ttgcagaatt gtattctctt acagcttct  
112201 ccgaaacatc aatctgtctc tctgtattat ctccgtttat caccagtgtc ttgtaggtg  
112261 atataggata aaaaaatgct agctcagttg tctcagctaa atcattatcg taatcacatt  
112321 tgaggttaat aataggttga tccgatgtga taaacgggat tgctgtattg ttattaagca  
112381 gtcaatcgt agtctctttg ctcatcaacg aatatgcca cgatgtttga atagccaaa  
112441 agaaaaatc cgacaggttt tctaaattca cttacttaa gtcaattccg acttttgca  
112501 aatcgagttt ttgattgaa tcccaaaact gcttcatcca gcgctctttt aatggcaatg  
112561 ttctgaaata ctggatacat atatcactca aaaagttgaa ccggtcattt ctatccagat  
112621 tatagtagaa tcctattccc tgctcatcta ttattctgaa atactgaact aattcacct  
112681 ctatatcaca ataaaaatct tccatattgt tattctttg aacacggata atctgttcgc  
112741 acttagagat ttcattatgc aaatcatcag gaatattatt ttccgttcca aatcgcttta  
112801 tcgcagcctg tttcattaca tcaagaattt ttgattttc aatcgggaga agataagtct  
112861 caatgaaaaa ctcatctgc ccacgaaca ctggactcat agtttgcaa taacaatcca  
112921 atagctttt ttgctctaaa ttaagctgt gattgtata aatgaattt ttgaaggcaa  
112981 tggcttcagt tccagtcgga aatagcttct ttctatctc cagcacccat actgcattgt  
113041 tttctttcca cttgataag taagctgaa aaacaaaatg atgtttctt ttacattt  
113101 ctatccttc catgacttg cacctcatat tattctatgc tttctttat tatagcggtt  
113161 tgtctccaa tatcaaacc aaataaaaga gctatgtaa ggcaatccga agattgcccc  
113221 aggcatcatg cctgttacgg attataccgg ttcgtgtcc tcctcatcag tggcaaagtc  
113281 aacatcatc tcgtctcaa attcctcgt gtagccgtag tcctcatcat cgtctacata  
113341 gtccgcatca gggcaggct tcgcagctc ttttcttc ttctttct gtaacttct  
113401 aaaggcgaag aaaccaccg cgccagcaag ggcaagcaga gcaaggatag ccggaatcat  
113461 attcgtctta ggcttctct caggcgcagg ctctgtgacc tcaggctccg gttccgtct  
113521 ggtcgttct ggagtggtc caaccacagg ttcggtatac ttggcagctt cttcctcgt  
113581 catcagcatc aaaaggtcgg cttcgtccac ctgattcaag aagtgaacgg tctcgtttc  
113641 ttcattcga cggctgatga tgatataaaa gtaattgccg ttctttgtga ccgagtaat  
113701 gaattgttt cgggtttgt caggcgagcc gacatcatca accagtgtca ggttgccatc  
113761 gggagtgagg gcagattcgc tggcatccg cccggtgtcc atattctgca tgaacatatt  
113821 catgaacatc ataagcagtg ccatatccat ttcgctgtc tgctcggctt cctcaatcag  
113881 ctccagatag tcaccgtgta catagccatg ctttccggga acgggtgatt cataccagtc  
113941 tcctcggtc ccgatcacct ttacttctc gccgggacga agctggtcga tgatctata  
114001 atccatgcct gcaccggtac gcacatttag ccggaaccg ttcgtgacca cttgcccgt

114061 tcccatgcca tcgtcctcgg tttcccggc atcatacttc cagtcctcgc cgttgaaaga  
114121 aaataccaca gtaccatctt catctacgga tacgctgtaa ggaagctctt ccgagctcg  
114181 aaccgtgggt tccgcagggg cagtttcac ggtttcgata ctggaagccg ctgtctcatc  
114241 cgtataggcg aaagcgggtg tcgaaaacac gctcatgcaa agcacagccg ccagaaaagc  
114301 ggcacacagt ctttaatct tcattctgca tctcctctc gttcatagcg ttgattgtct  
114361 caggcttcgg agccatatcc gcagcaaaca tacggagcag ctcaaaaagc tggtcagggg  
114421 tcaggttcgc agcgtgaacc atttcatgga tttcggagtt ttctctca cggtatctgc  
114481 gttccaggtc ttttactctg gcatccatt cagcccgtt cctgcgggct ttctcaaggt  
114541 ctgcaccgat tctgtctaatt ttggcacca atagaatgct ctccttaatt ttgattctg  
114601 ccgaagcagt aaaaatgctg ttgccagtaa cttgttcaa tcgaagcata agagatcggg  
114661 tttccacagt gaatcatcat cccattgccg acataaatac caacatgcga tgcaccggag  
114721 gtatcatagg tgtcttgaa gaagatgagg tctcccggcc ttgcagagct tcgagggata  
114781 atatcacata caccatcaa accgtttcgc gtcaatctgc caacgctca gccattgccg  
114841 cagttattga tgaccacga acaaaaacc gagcagtcaa aggaagtgga gggactgctt  
114901 ccacccaga catacgggta tccagatac ttctcagctt cccggatcat gttggcaaag  
114961 cgggtatccg tcagagcttc gcccggaata tcatagtcgg tgtattcgc ggtgactgca  
115021 taaatgtcgt ccccgaagat gtccgggagg ttcccgttg tctggaggag tacacggtat  
115081 cgctccaatt catcctctgt cagaccggag cttccgatca cacggtcaa tccttgttt  
115141 accagcttca cattcaggat ataatactca tactcaacct caacttcgta ctctattcc  
115201 tccgtcgtgg tctcggcgt ttccgggtct gtggatgctg aggtgccgg acgggtctct  
115261 gtacgggttc ggatttccac ttcttctgtc aaaattaact catactgctg atcgaacagc  
115321 caccgcagag tgctttgcac ttctcacgg gcgtaatct caaactcac agtcagatat  
115381 gccccagct catagggatt gtggtgac tcatcaaggt cataacggta ttcacgtaa  
115441 ccgctgtgag tgcgctgat gttgtgac tgatttca gggcagctc catcgcctta  
115501 taatcattgt ctgcccgat gatgtcctc tctcggcag taaaggaagt cccagaatc  
115561 acctgcgtcc ctccctgaaa catggcagt caggacgaga acatactgca aataagcata  
115621 aaaagcagtc ccgccccag acaagcaga atgactttgg agtgcgtggt gcaaaactcc  
115681 gtggctcttt ctgtgattgt cttggctccc tgggctgct tttccgacc cttggcagct  
115741 gttgtctttg ccgtactgtt accggcttg gcagctgcat attcttctt gattgcctgt  
115801 ttctgctgcc agcgggaaaa cgggttgaa cctgcattgg gattatcctt cttgaacttt  
115861 tcaaaaggg catccacatt ggctttgtct gactttgca ccaactatc ggccttatca  
115921 tgggctttca gttgtggct gtagatggcg tgatcgacgg ttaggcaggt ggattccact  
115981 gcctttgtc ttcctgtgc ggactgaaca ccgacattat catcttcata ctccgatacc  
116041 gcccgatgca cttggatgt gagggcaca gccgtaccac gggtagcaag ctgtttgcc  
116101 gaagatgggc gatccgtagc cacgctgtt tccgcttgc cgaacggag ctttgcctc  
116161 cgggaaccgg cggcatccgt ttctgacgc agcttggtg cttctttt ggaagccagc  
116221 ttatctaccg cttttctgc ttgtcagcc gctttatcc caggtcagc agctttctc  
116281 acctgagaat ccgcaaggtc atctcggtg aagcggagtc gtgtcggttt cttcccatg  
116341 ccttacgct ctttgttg caccacctca ttcagcttcg tggtcataat gcggtagagt  
116401 tccgtatcgg tcgggaaccg gtcaatgaac ggcaggatca cattgccata aaacagaagc  
116461 ctttgcct cgccgaatt ggtcacatag gacagctgg ggggagagat attcagacgc  
116521 ttcgccgaa tccctctgtc ctgccttgc tgattcagca tataaatgaa gtcggaatt  
116581 tcaggatat tggcaatctc cggggaacga agcaggtctt tgacattctg ggtgatgccg  
116641 gtgggcagcg cgccttctt acggaatcgc tccagattt ctacggaata gttgtctgc

116701 tgctcctct tcaaaagcag atggaactcg tcaatgtagt atctggtgga tttaccggca  
116761 cttcggttgg ctgtcacacg accccaaacc tgatcctgaa caatcagcat accgatttc  
116821 ttcagctgat tgccaagctc ttgatgtca tagcagacca ggcggttatt gatgtccaca  
116881 ttggttcgat tgtgaacag ctcaaagaa ccctcacat agatttcag tgcagtcgcc  
116941 acatgatggg cttcttttc gtcctgttg agaagtgcgt tatacaagtc ctcaaggaca  
117001 ggcatatfff caggaaccgg attgtcaaaa tatctctggt aaatctgatg cacacaacgg  
117061 tcaataactg tcttttcaat gggctgcaag cgtccttac ttccatgat caactcgag  
117121 agggaaagaa tgaagtctgc tttcagggca acagggttat catcctcaga gtagttgata  
117181 ttgatgtcca tgggattgat atagttgta ctggaagaac tgatctgat tacctgacct  
117241 tcaaaactgt gaaccagcgc cgcataattct gcttccgggt cgcagatgat aatgtcatca  
117301 tccgtcacga ggaacgcatt ggtaatccta cgctttcgg agaaggattt accggaacca  
117361 ggcgtaccaa ggataagccc attgggattt ttcagtttct ttctgtccac cataatcagg  
117421 ttgttgata aggcattcag accgtaatac aggccttcgg caccattctg gaacagctcc  
117481 tgtgtggtga acggcacaaa aatagccgtg gaactggtag tcaggccacg acgaatccta  
117541 atcagattct gtgccagcgg cagactgctc atcaagcctt gttcctgctg gaaatccagt  
117601 cggcgcagat tgcagttgt cttctgggag atactctgtg cctggaacac attgttttcc  
117661 aactcctgtt cgggtcggcc ggtgttcatc acaagaaagg tcagcatgaa catccgctcg  
117721 ttctggctct gcaattcttt cagaagtgt tttgcatctt tgccgtaggt ggcaaggta  
117781 gagggaatga tgtccatgta ataaccggaa cggacagcct ttttctgtc ctcaatctg  
117841 gaacggtaaa gctccgtgat ggttcgctg atggtcttga ttgcccgct ctggtctacc  
117901 gactggatgt gcatggcac gatctggctg gattccatat ccagaaagtc agccagcata  
117961 cggtcggaaa ggtcagaagc gataatttgc agataggaca tcgaaccgta gatgtgccc  
118021 atctggaagg tacggctgtt ctgaaaggca aacgctgtc ggcgaataaa gtcctttacg  
118081 gacagaccgg attccacaag atactccag tcaaagaaga acttatcatt gtcacccatg  
118141 tggaaatgg agtgatcag acgaagccgt tccttccgt tcatcgtgga tgccatcaca  
118201 cccaaacggc ggaagttgt gagcaggta ttctgatata gttcaatct cggttttgcc  
118261 tgacgcatgg actctgctc gatgccgaag gtcagatact tggcttggg cagaccgta  
118321 ttgccctgag aaagctgctt tttcaggatc tgactgtact cggcacggga agcattgaag  
118381 ttgtctttc ggaacgggat acggatgctc tttcaaagc tctccgcatc ggtactcatg  
118441 ttcataaagg acagctcaaa ctgaacagag ctgtcgaaga aattcaggaa actgcaccac  
118501 tcatcgaaaa tggcggtttt atcctcctgc tgtgccagct gatagttgat gtctgaaac  
118561 tgaatggttt tgggtagta gctgtctgt acccggcaga taccgtccgg gaacattctc  
118621 tgaaggaa tggactgctg ggcggctgga ggaatccat tgtctttct tggccgttct  
118681 acaacagcct taatttctct ctgctgctt cgattcagat ttgcaggcat tttatttcc  
118741 cttgcctgag gtttcttct gaaaaacaat tcgctcaacc tcttttcaa gttgatattg  
118801 acgcaccaga gcgtcgtaat agttgtcgt ctgataaggt cgaacctgg gacgaataaa  
118861 ttttgcctga atgaaatgct ctgcaatgac ttccagcggc tgacctct tttctacat  
118921 agccagaaag aacaggggaa gcatgacaat catcatggtc agtgccgcaa ggcttacatt  
118981 tctgttctct tgaccaaaa agaaaatcgg caccctaatg agtgccgag agccgaaaca  
119041 gatcagctgt cgtttgtca gattgaagaa caccttgtt tttaccctc ttaggtcacg  
119101 gggtagggg atatagctg cactgaaaa cctcttct ttagtgggca gagaacacgc  
119161 ctttgcag agaacggctc tgaacaggg tgaagcaca aagaaccgtg tatccatga  
119221 caccagat tgaagcgata atgtcctcac tgaagcgac cgactgcacc agaaccgcat  
119281 agataccgac acagatcata atcaggaaac cctggaacc gattgcaaag agtgacctca

119341 gatagttctg tccaacgctg ctctgttctc tgttcccgaa gtagcaaaa ggaatcggag  
119401 caaggctgac catgagataa atctcaatca ttcgtccgta aacaataacg aagatcacga  
119461 ttgccaatgc cgacatttg acctgaacaa tcagggattg caggaacagc cctaatacgc  
119521 gaccgagatc cattgccatc agcgtatctt ccattgttc aagcgcgccc gcatctatgg  
119581 cgggtgtccc cgcaatgata ccggcgtgg cattgatcac gtgctgtgcc acatcaaca  
119641 cagccattgt gatattgaat gtgtttgtga ttaacacgac cgcaacgaag gtcttgaaca  
119701 cccacttgaa aaaaatccat gtctcaaaat tcgccagatt gttgtggtcg ataactcatt  
119761 gaatcagctc gtaacaggcg ataaatgca gtatcaagcc tgctatcggg ataactcgt  
119821 actcggagat gttcgtacc atggcaaaga caccggcga gaaattcgc ggggtcatgc  
119881 caacggaggt tgctatctcg ccaacctggt tttgacgga ctcaaacatc cccgacagat  
119941 tccccatgat ggctgaaacg agcatttctt tcagccagtc tttatctgt tggagtatgc  
120001 tgtccaaagg cgattacct ctttttacg gattaacaa agagaccgga aagcaggggt  
120061 acaagggagg ttccgatgag agcgacaccg ccgccagcca tgagctgctt cataacctga  
120121 gactttgcgc cggggttgtc gttgccgtag cttcaagca gggtgattgc acccagatg  
120181 ccgagacctg cgccgagagc gataacgaga gtctgaagaa cggttactgc gctgtgaaa  
120241 aatgccatat acgtttcctc ctgatattg aatggattt tgaatgaaa aaagccctcc  
120301 acaataaccg agaaccggtc ggagggcaga gacaacgaga ctattcaact gcaatcatat  
120361 ctatcaccac caccttcaa gggaaatagg gtcaaccatc tttgccggtg cgattacca  
120421 gaccatccct tgcttttga atcttctgga tgcggctgt cagctgggca atcgttgc  
120481 tgatttcatg ctgattgtcc gcatagaagt agccatcata atcgtgcaa ataggtcac  
120541 ctttgcttcg caggaattg acgattctc tgatttctga ccttttaca tgaaaaacgg  
120601 cttcaagcgt tttacttga accggattgt tggaaactct gtaatactg gacaggtatt  
120661 cacagaatgt ttctcaata ttgaattggg gagtttttc cattaaggcc ctctctgat  
120721 aataagttg taagcaagaa aaaccgcta cagacttatt ctttttggg tataaatggt  
120781 aaggatatct aagaggtact cccctcatcc cgattccat ctatacagtt gatagttaca  
120841 tttcaatata ggtagatcct gtggtatgat atcaggtaga gtctgatgtc cgaaggcact  
120901 gcttctcctc cttcagccg gcttcgccc agactgctt gaaagcattc agcctggcac  
120961 atacggcaca ttccgtgac acagaattht catccccagc cgttagcccc agcaaaaaag  
121021 gctgactggg tgcatgctca ttgcgagagg gttcggcac cgtatgcggc acaggataaa  
121081 cttttgctt caggcttcac aatccccat cggaatggag gtgatcat gttaaagtc  
121141 aactatatgt ccacttgtt ttaggtatt gatgtaagct caaagaccaa tgctgtctat  
121201 gctatggact tcaggaaaa caatacatc tcatcatcgt ttggcaataa ccagccgggt  
121261 gccgataagc ttgttaatat gattgctgag tttatgcaca agcataaaaa cctgaatcgc  
121321 attcttatcg tgctggaatc cacttctgta tacagcgtcc atatttcaa cttctatcg  
121381 accagcgagg ttctcatgcc ctacaagcct tacgtcttct gtgtaaacc aaaggccact  
121441 tcgaattacc gaaagtcta ttcggaatg gaaaagaccg atccacaga tgcatatctc  
121501 atcgagact ttggcagggt agccgtacg aaaaaactgg agccatggcg cggcgggagc  
121561 ttcatatccc tgaacgcct tacaaggcac cgtatgcacc tttctgagt catcaccagg  
121621 gagaagactt atatggttc gaactttat ctgaagtca gtgaactca gtccttga  
121681 ggtgatgaca agcctttgg cagtctctat ggtgccagct cctcagctgt cctgacggaa  
121741 tttttgtctc cgaggagat tatgatgat ccggaagagg agctgcttac cttcttgcg  
121801 gggaagagca ggaaccgat ctctgacct tcaaaaact cggaactcct gcgcaaggca  
121861 gccagggatt cctaccggtt agacaagtgc atgtatgaac cactgagcat atcactggca  
121921 agctcgttta actgcatcca cgcctatcag aaagaaatca agctgatcga gcaggcgtt



121981 gagaaatgca tcaacggaat gaaccctaac gcctgtctca tccttcaatc catacctgga  
122041 atagggtccga tatgggcatc cggaattcta tcagaaatag gcgatataac cgtgttccat  
122101 tcatccgatg cccttgccaa atatgccggc ctttactggc ctaagggtga ttccggagat  
122161 ttcacttctg aggacaacaa aatgtcgaaa gccggaaatc cctatcttcg ctgctatctt  
122221 ggcgaaagcgg caaacagcgt caggaagcac atccctgaat atgctgattt ctatgccaga  
122281 aaatatgctg aggtaaccaa acatcagcac aaaagagcac tcgcgcttac atctcgtaaa  
122341 ttagtacgac tcgttttgg attgctggtc aaaaaccaac tgtacaccgg cgaaaagctg  
122401 gacaccgaat ataatttga gtcgaactga cattcggtta tacgtaaaat ataccgaagg  
122461 tctgttaaag ttaccctttt ttctgaaaaa catatcaaaa tcttcttcaa aaagttcttg  
122521 acatatcacc agaattgctt aatcggtcgc gactactaca aattcatcac ctgcctttaa  
122581 tttcaatctg cggctcagaa actgttcgat gttgaactca ttcttttgt cgaagtctga  
122641 tgtgtactta tagttcggat gctgtgtcag atcgtacttg tcagacagaa acggctcac  
122701 accacgcagc tgcaagatgc acttaccacc atccagaact gccagctcat ccacgggtcc  
122761 aaggctcttc cccagctttt gataattcat gccgtaggat gggctgttc ctctggtatt  
122821 tgaggtgttg taggtgtcga tggctcttt cccagcgcg tgattcagct ctttcagtgt  
122881 ggtaggctca gaaccgccga ggaaaatacg ggaatccata ttgccgatga tgggtccga  
122941 attgtccttg taaatggctt tcagctgaga ctgctcctga aggacaaggc aggcagatat  
123001 ttcacggctt cggatggtcg caaccagctt ttccagattg ggaatctgac cgatatttg  
123061 cgcttcgca atcagacagc gcacatgaac cggaagtctg ccgccgtaca catcatctgc  
123121 tttctcaaa agcagattga acagctgggt ataaatcatg gagattagga aattaaagt  
123181 cgcacccgta tccgacataa tcaggaacag tgctgtttc ttgtctccga gagtatctaa  
123241 ctgcaattcg tcataggctg taatatccc gacttctga atatcgaagg gagcaagct  
123301 tgaccacag gaaatcagaa tactcttagc tgtttgctt gccgccagct tgtatttctt  
123361 atactggcgt accgcaaaat gatttggctt tttctttcc agtgcttcaa acatcaggtc  
123421 aaccggattc tggaactcct catcgtctc acgcacctcc attgcgttta agaactcaat  
123481 cagagtggag aagttctgtt ctcaaccgg cgcttcatag tggatatacc caatcaaggc  
123541 gcagtacaga agggctctg cttttgtcca gaactcgtca ccggcttcc cgtcgcctt  
123601 ggtattggca atcaatgtcg tcaccagctt cagaatgtct ttttctgaat ggatataaggc  
123661 gaacggattg tagtgcacg acttcttaa gttaatggtg ttgaaaatct tgatgttga  
123721 accatgttcc acaaagcat tgccgcactc gatgacaata ctgccttctg ggtctgtaac  
123781 aacatagctg gagtgcacat ggagaagatt cggtttcagc cagaacctg ttttctga  
123841 acctgaacct ccgataatca gaacattctt gtttctggca ttggcaggat tcttcggtc  
123901 gttggacatc atcagccgtt ccgtttctg taggataata ttgtctcaa actttggagc  
123961 ggtgaacggc tcaatgtctt tggctgtacc ccaacgggca gaaccatact ccacattgtg  
124021 ccgttacttc ttggcgtttt tgctttctag ataaaccgca agccgaagcc ctgcccaca  
124081 ggcaattccc accagcaaat ccagcggatg aaagctgggg agtggattgc ccagggcaac  
124141 cggaaggga taaaaaagc tgaggattt tgacagaaga tctgtaccct cagccaaccg  
124201 ccatgcttct caaaattcg ttgcaacaa tcccaccaga atatacggga tgttcagaat  
124261 caggagctt tcaaatga tttgtctcat cacaaatcac gctcctgtt ctttccga  
124321 accttctg gtagctgc taccattct tgaactct tcagctgtgc cagaacgctc  
124381 ggttcttat ccttctca tgacctgctc tgatgttct tcagatagc atccagggca  
124441 tctgctctc ttgaacggc aaagacaaga taacggggag gatcaacgga cttatcttt  
124501 ctacggcaa agtccacacc gtatttctg gcgagcctt caaatccc gatgccatct  
124561 ttatcaattt ccacattgtt ggcacctga ttctgtcca gcagctgtt cacggattgt

124621 tttccgtgaa cgcgcgtatc tctggttct tttctgcct tgacctttc ccggtgctgc  
124681 aaatatttc gaataccggc aatgatactt cgagcagtca gccttgtcgt gctgattgcc  
124741 agatttatcg tcctgtttc aacttcttc tgcataatc atcacctct gcaagcagta  
124801 gagtgagggt catcgtgcca tatctctgc gtcgtaatac agatttctc tggcaacatt  
124861 ggcatgactg ataacttga tgtcccggc tttctggta tccagagctt tctgatacc  
124921 ggcttcgctc agatacagac ggtttcttc gcctttccag ccaacaggag attcattggt  
124981 cagcacatca aagataatca tatgcttgt ggcttcacg aatcttgcca ggtccatata  
125041 ggtgtgtccc tgatactct tggctcctgc ctgtatctg cggcgttcca tcaattctgc  
125101 aatcgttgag cttctttcca tgatgcctcc ttacagcgta tctgatcag ggctgcttt  
125161 gcgtggggtg gggtcagcct tgataggcgc atcttcttt ttgacatat catcgggcaa  
125221 cggcaaagcc atgatactgc gccccatgc aacgaagggt tcaggctgat ggaaatggtc  
125281 ttcaaactgc ttcacagct ccggggaaag ggaggaaaaa tctcctcac ccaaaccgac  
125341 aaccagaaag tcaccggcga tgatgtcga gatctcgcg tctccgtccc gcaacgcagc  
125401 attcaggtct ttcccatga ttttccctc atcgtgcatc accaatgcga caggctcatt  
125461 aaaaggataa acagcttcaa tgtcgcacc gacagcttc tgcaaatct ccaaatcgca  
125521 accgatctga acctgctggg gatacatata gggctttacc agaagcacg tcatggtttc  
125581 tgctgttcc tgctgaatc cacgttctc cgtagtcca aactcaacgc cggtaaagtt  
125641 ctggagtc agaattgact cggaattga gtaggctgt ctgacctgt cttctgcatc  
125701 agcacgggac ttgcttcca ccgttaccgt ctttccagt gtctcggta tctttacatc  
125761 gtattcctc aaactcatt acctcattt cgtcagacat aagaaaagcg accatccagc  
125821 aacctgttac agttcataa tagtcgttc atgttccac tgggggacac acatagattc  
125881 cagttcctc atcagttct ctgggaaaa gaacaaatcc tccgacttt tcaaatctt  
125941 tttgaaagcc cgttactccg tcatatagcc ggtatcatca gagccgatca gcattgacac  
126001 acagcggaca atggcaaagt tcatatctc cataagccac agttcggtt cataggtggt  
126061 tttgatttca tcaaaaccg cctgctccac atcggaaata atgaggcagg cacgctggtc  
126121 aaacagttc atgccacgg aattgaagca tttctatag ccgccggta cggaaattg  
126181 atatacctc tgtgccgac ctctcaatgc ggtgcaaacc tccggcagac acaaccacc  
126241 ggcatagcc atctcatct catcatacc ctcataatct tcgggggaaa acagctcaaa  
126301 cagccagtc attgctttac tcatttctt ttcgttaac atcgggattc accttacct  
126361 tccatagatt tctctgttt cttctgcat tgctccagca gctgaatgat tttatctcc  
126421 atctgctgc tgggttagga cttcgggaag tatttccgca gggagtcggt tttgaatgc  
126481 accctgtcca gctcgcctt ttgacctca ttcataatct cgcacatggc atccagagta  
126541 cactcgcct cctgtgccag tttttgatt ctctgtcct tgaaaagaga aggcgagcc  
126601 tgggcaaagt ccatagcaga aagaaaatcc tgctgttct ctcttgccag ataagaaagt  
126661 tccaccgcc gattaaatt aatctgacc ttatccacca tatccagaag ttcggggata  
126721 agctcggtta aacgaatata gcgttgact tgtacacgac tatcggcct ctgttcagca  
126781 acttgattta ctgccacga cttctgcca agttgggcag aagttaaatc acttctgca  
126841 cttgatgtt tcaggcatc taactcatt ttataagcat aggcttttc actcggcaga  
126901 atggtttct tctgcaaatt cgcacgacc atcaaaataa tggcggcatc atcatcata  
126961 tcacggacga taacgggcat ggtttcttc ccggcaagct ctgatgcag gtgccgctg  
127021 tgaccggaga tgatctata accgcatcc ggtcgggac ggacaatgc cggggtgaga  
127081 acaccgaagt cacggacgt ttcaaccgt ttcatcatat cttcatcgtc taccaccgg  
127141 aaggatgtc cctcaaagg gtgcaattca gaaagcggaa tttctgcac ccgctcctg  
127201 tgggcttcg ctctgactg gtcgtagag aaaatatcat cgtaccctt caagctgatg

127261 tttgcgctt ttttctgcat ttttaaacac ctcctttgtc agaaccggg aggcatcagc  
127321 gacttttctt tggggtcgt gcttaaagat actggctcct tcggcactga tttcctctgc  
127381 acgaacagaa cggggaatgt ctgtcttgta gactttcagc tttcctccat aactttccc  
127441 gatcagattg ctgatgtcct tggaataatt ggttctgctg tccaccatcg tcagaagaat  
127501 accctcgatt ttcaatttg ggttgattg tcgtctgacc ttgttgatgg tttccagcag  
127561 ctgtccaag cccttgccg gaagatatgc cgctgaaca gggatcagca cattgtcggc  
127621 agtgcctaaa gcattgactg tcagcatacc caaagagggc atacagtcca gaagaatgta  
127681 gtcataatc tgcttgaccg tatccaggta ctgacggaga atgggtctcc ggctcatggc  
127741 attgaccagg gaaacctcta agcctgacag ttcaatattg gcgggcatca agtccacacc  
127801 tttcgggtga tgaagaatgc cttcgccggg ggcaatcggc ttttccatca taatctttc  
127861 catcatgtcg gaaaggggtg aagataaggt atccgggtac ggatttcca gactgactgt  
127921 taaagaagcc tgcgggtctg tgtctaccag cagaacctt ttgccctcca tcgccagtcc  
127981 cacacccaaa tttccgtgg ttgtggtctt gccctgccc cttttctggt tgactacggc  
128041 aatgacggtt gctttttcg acaaatatct ttacctgct ttctattctg tgtatactgc  
128101 attgattacc acctccctc aagtttccc gaagccatat catgcctgac ctttgcgtca  
128161 tagtgggctc ttatggtgta gggggcattg tatatcgaag caagtaaata ctgcttgata  
128221 ttgcgaacat cggttggtt ctcttgaaa gaactcatta caaatctgat gtgttcagaa  
128281 tccagcttca taaaactgct tttgacaatt tcaatgggct tatcatcact ggcaattcgt  
128341 atttgcttc gattactgca catgacttca ataatacaat gcagaattag atcgagtatc  
128401 tcatggtcat acggataatc ctgtttcaga tagtccatag aaagctgttc ataaaaatac  
128461 tgataatc gggtaaatc gtcagtctca tcgacttct tccacaaaa accggaagga  
128521 aagaaaggat ctgtatcact aaaatcaata taattagtat cagtattatt acctgtgct  
128581 tttgacagtt ctggaattgt gttttgaca actccagaat tgccttttg acaattcaag  
128641 aattgtctt ccacagaacc ggaaatgaag ttctttacat agatcaggtt cggtttcca  
128701 agtccctgtc gcttgcttc tatcagaccg catttcttt ccagctcctc cagcagctc  
128761 accgcttct tttcagcaca gcctaacgca cctttgatt cttcaatcgt gaagatgata  
128821 tagacagggc cttcctctc cagccaaccg ttccgggctg agaggttcat gcggtcaagc  
128881 agaataaccg aaagcagctt ggcatcgggt gatacattcc agaagcaatc ctcggtgaat  
128941 agcaccttcg gaacacggta gaatgcgaac atctccgctt gctgccata gaaataatca  
129001 tacgtcac

//

DEFINITION Integrative and mobilisable element IME\_6

fasta\_record 1..7027

/ID=D90|SC|contig000001

/label=D90|SC|contig000001

/note="D90|SC|contig000001"

/colour=5

CDS 356..634

/ID=D90\_00915

/color=1

/locus\_tag="D90\_00915"

/note="hypothetical protein"

/product="hypothetical protein"

/protein\_id="gnl|SC|D90\_00915"

CDS        /codon\_start=1  
             738..1505  
             /color=8  
             /locus\_tag="D90\_00916"  
             /note="Nucleoside phosphorylase, protein  
             motif:CLUSTERS:PRK07115 protein motif:TIGRFAMs:TIGR01721  
             protein motif:Pfam:PF01048.14"  
             /product="Nucleoside phosphorylase"  
             /"ID=D90\_00916  
             /protein\_id="gnl|SC|D90\_00916""  
 CDS        /codon\_start=1  
             1559..2431  
             /color=2  
             /locus\_tag="D90\_00917"  
             /eC\_number=2.7.7.-  
             /note="Aminoglycoside 6-adenylyltransferase Streptomycin  
             adenylyltransferase, similar to AA  
             sequence:UniProtKB:P17585 protein motif:Pfam:PF04439.6"  
             /product="Aminoglycoside 6-adenylyltransferase  
             Streptomycin adenylyltransferase [antibiotic resistance]"  
             /"ID=D90\_00917  
             /gene="aadK""  
             /protein\_id="gnl|SC|D90\_00917"  
 CDS        /codon\_start=1  
             2573..2926  
             /ID=D90\_00918  
             /color=1  
             /locus\_tag="D90\_00918"  
             /note="hypothetical protein"  
             /product="hypothetical protein"  
             /protein\_id="gnl|SC|D90\_00918"  
 CDS        /codon\_start=1  
             3205..4746  
             /color=4  
             /locus\_tag="D90\_00919"  
             /note="DNA strand transferase Plasmid mobilization system  
             relaxase MobA/MobL family , similar to AA  
             sequence:UniProtKB:P07112 protein motif:CLUSTERS:PRK13889  
             protein motif:TIGRFAMs:TIGR02768 protein  
             motif:Pfam:PF03389.9"  
             /product="DNA strand transferase Plasmid mobilization  
             system relaxase MobA/MobL family [relaxase]"  
             /"ID=D90\_00919  
             /gene="mobA""

```

        /protein_id="gnl|SC|D90_00919"
        /codon_start=1
CDS      4812..4973
        /ID=D90_00920
        /color=1
        /locus_tag="D90_00920"
        /note="hypothetical protein"
        /product="hypothetical protein"
        /protein_id="gnl|SC|D90_00920"
        /codon_start=1
CDS      5050..6687
        /color=9
        /locus_tag="D90_00921"
        /note="Serine recombinase, protein motif:Pfam:PF00239.15"
        /product="Serine recombinase [recombinase]"
        /ID=D90_00921
        /protein_id="gnl|SC|D90_00921"
        /codon_start=1
CDS      6947..7027
        /color=1
        /locus_tag="D90_00922"
        /eC_number=5.99.1.2
        /note="Type III DNA topoisomerase TopB partial, similar to
AA sequence:UniProtKB:P14294 protein
motif:CLUSTERS:PRK07726 protein motif:Cdd:COG0551 protein
motif:TIGRFAMs:TIGR01056 protein motif:Pfam:PF01131.14"
        /product="Type III DNA topoisomerase TopB partial"
        /ID=D90_00922
        /protein_id="gnl|SC|D90_00922"
        /codon_start=1

```

BASE COUNT 2402 a 1135 c 1722 g 1768 t

ORIGIN

```

1 ttatcgagtg aaaataatgt ggaaatctca gtataggaa atgtttcat aggcat
61 taatgtggtt ttcacaataa gtatcgttgg atgtcggag atagagttgg ctaa
121 tacttacctt cccttctt ctcttctt ctctagagaa aaaagagaaa aaga
181 gaaaagaaag aaccaaagaa aagaataaaa gaaaagata aaaagagat at
241 tatcttatcc tatccatcc tatccgctg cctacggcag gctttattgt tt
301 aaagtacgag tcaagagtcg tagtaaatac gagccaagga gaaaggagtg at
361 cagtttatcc aagtatgagc aggaaacagt tatcaatgtt aatgcagggg a
421 agtagttat accgagata aggcagttat gaggaaactt gacgcattag tt
481 tccagaggtt tataagctgg tgggtgaaac agttattgat aagacctatt ca
541 atcatgctgt agttatcgtg agccgagaat actggatgat aaatatagag a
601 aaagcaaag acacagtata atatgcaaag ataatccatt gaaaaaaagt g
661 atataattc gttgcaat aagtactgat tttgaattaa atcagttcga caa

```

721 ttgacggag agatagtatg gctattatta aaaacgaaat accgattttg gagtttgata  
781 cagagcagac agcagttctt aatcccactc atgaaaatct tggtttgaac ttaccaaga  
841 aatgtgtgtt cgcatttctt ggtgcttaca tagatgaata tgccagtaaa agtgatacca  
901 aacaggtatc cacttttgag agtgcaacga agcattatcc catttacatc accaaataca  
961 agggtgagga cattgtgctt tgtcaagcac ccgttggtgc ggcagcagcc acacagatac  
1021 ttgattggct gattggttat ggtgtaagag aggtaatctc ggcaggtagt tgcggtgctc  
1081 tggaaaagtt cccgaaagt acattcctcg taccaaaca ggctctgctg gatgagggaa  
1141 catcttatca ctatgcgcc cttctcgat ttgtgaaat cagcgagaag gcaagaaaag  
1201 caattgaaga aaccattctt gagcatagta tgaatatca ggaggtata acctggtcaa  
1261 cggatggatt tttccgtgaa accaaagaaa aggtggctta tcgcaaaagt gaaggctgtg  
1321 cagttgtaga aatggaatgt tctgctctgg cggcctgtgc tgattcaga ggggcaacct  
1381 ggggtatgat actttatacc gcagacagtc ttgcagatgt tgacaaatac gacgaaagaa  
1441 actggggcgg taatgcatac gaatatgcac ttacgctctg cttgatgctg gttatcaat  
1501 tataagaaca gttagaatca atctttttt gtgttataat tttattgagg tgaatgaaat  
1561 gaggactgaa aaagaaat acgatttagt tttgaatttt gcttttcaag atgagagaat  
1621 tagaattgta actcttgagg ggtctcgac taatgttaat ataccaaaag acaatctta  
1681 agattatgat attactttt ttgtataga tatgggagaa ttttgaaaa gcgatgactg  
1741 gcttagtgtt ttggttaaca gaattatgat gcaaaaacct gaagatatgg aattatttc  
1801 tccagaagaa aaaggatttt ctatataat gctttttgat gatgggtgaa agattgatt  
1861 aactttgta cctgtttcaa tgcttgagga gtatcttact cgcgataaac ttgtaaaaat  
1921 catgttagat aaagataata tgattaaaac agaaatagtt cccacagatg aagattatta  
1981 cattaagtgt ccaacagaaa gaaagtttga tgactgttgt aacgaatttt ggaatgttgc  
2041 aacatatgta tccaagggt tacttctggtg tgaataacta tttgcaatag accatatgaa  
2101 tgaagtatta cgtcatgaac ttcttaggat gattagttgg tatgtcggta ctgaaaaagg  
2161 atttaatttc agtttgggtg aaaactataa atttttgat aagcatattt caaaagaatt  
2221 gtgggataac ttactaata catattcaat gagttcgtat gaagaaatgt gaaatcgtt  
2281 tgatttgtg ctatgtttg tcaaaaaat atctaaaaa gtggcagatt cacttggtta  
2341 taattatcct gattatgatg aaaacgttac aaaatattg gaaacacaaa agagaatttc  
2401 aaataaatat ctttatggta ataggtattg acaaattcca attgtctaa cagataagtt  
2461 ttattttaac gagtaattta ataaagtgt gagcacaaa aggtggcatg gatattaaaa  
2521 ccatgaccgc ctttttgtt accaaaaatc aaggaaaaag gagaatgaaa tcatggtaca  
2581 gaataacgaa aaaacagcag aggttttaaa agcagagagg attgtggagc aggctaaagc  
2641 aagactggca gaagccaaga gaaaggcaag ccagcagaag cgaaaagagg aaaatcagca  
2701 taagtacatg ataggtggca ttgttcaaa atattttccc gactgctacc agtatgacga  
2761 gctggagctg aacagaatta ttgcttggg gattaaatca gagcagtgcc agcgattat  
2821 agaaatttg aaaaaggaaa gtgctgaaaa gactgttggg gttgctcaa atgctgaaag  
2881 tgaggtggca gggaatgaag gaactggcaa gggcgaaaat gtctaaaacc agtcaacgag  
2941 attttctctg tgcgcacaga tatacatca cggatggat gtgcgctctc cgaggggtct  
3001 tgcagacagc tattgcctgc cgagggcagt caaaaggaa cactgcgttt tccctcggg  
3061 gcagagggcg cacctacca ttgcatact ttgcgttcag tgaagctcca aagagcggag  
3121 ctgcactgcc cacaaagtca gccgataccg cacaatccac agtatcggtc tgccacagcc  
3181 tatgcaggag agtgaggtgt ggctatggca gtaaaaacc taagtaccg agttgccatt  
3241 atcgaagag gtgcaaagt cagaggtgt tcatccgag ttgacaagtc tgcatatc  
3301 agccgtacca ccatgtact tgaatatgac ggaacaacct attacccgaa gtataccgag

3361 gatttgggtgc ataatgaggt catgcttccg gtcaatgcac cagcagaata ttcagacca  
3421 tcggtgctat ggaactccat tgaatgagg gagagtaaat ctgccaagc acagctggcg  
3481 aggtcatata aaatcaatct gccgaatgag tggagttag agcttgccat tgaggtaatg  
3541 agggattatg tgaagaaaa tttgtggat gatggaatgt gtgccagtt tgccatccat  
3601 gactccgaaa acccgaatac gcaccagcgc aatcttcaact gtcatattat gcttaccatg  
3661 cgccgattt tggaagatgg ttcattgggga gataagcaga agaagattta tgactggac  
3721 gcagacggaa acaagataag aaaaaagaat gggcaatata aatgcaccac gcaggatgtg  
3781 actggatgga acagcagggga gaatgccagg aagtggcgca aggatttagc tgacaccata  
3841 aatgcggtca atgataaaaa cggattaagg gagaatfff gggagcatag gtcatttgcg  
3901 gagcaggggc ttgataccat accacagata catttgggag agaaagccag tgcgctggaa  
3961 agggcaggaa tacagacaga gagagggaaat gtcaaccgca ggataatgga gcagaataag  
4021 gctattctta ctgcaaaaat gcttgggca aaagcagagg aacagttgca gaagcttgtt  
4081 aattccaagc cagttgaagc agtacgcaat actgcaaatg aagtccttga tatgattagg  
4141 gcagttgtcg gcaaaaaggg cagactggaa ttgccagtag tcaagagcaa atatttgagg  
4201 aagatttatc aaagacagtc attgcaggag caggagagaa tggagcgttt tgttgggca  
4261 aatcagattg agagctttga gcagttgag gagtttaaga cacaacgaga gccagcctat  
4321 gagaagctgt cagcggagag acaacagctt gcggagcaga tagcaagact ggagcagttg  
4381 cttgtggcat acagtgatta tgagccttat atcgtgtatc ataagacgag taattcgctg  
4441 aaaggatttg ccaagcgtaa atatgataaa gagcatgaaa cggagcttag agaatacaac  
4501 agttatcgtg caaaattaa gaaaatgctg tcctctgatg agaagattac tccgaagaaa  
4561 tggacagcgg aaaaggcga actggaagaa agattgcagg agagcaatcc cgactatgca  
4621 agagtgggta cggagcttgc ctcaacagag gttattgagc ataacagaaa aatgcttgc  
4681 atgaccgag aagccgagca gaatcagcgc agtcagagca agaagaaaa tgaacagtca  
4741 ttataacagc gagagggcag tttgcaagca atggtttga gctgtccttt ttgcatgaag  
4801 ggagaaaatg catgaaggaa aaaaagatga aaggagcag gagtgtcca agaccacac  
4861 gcattgtgtg agagcgtaaa tatgtcgggg atgtgaagat ggaagaggta ttccgacaca  
4921 tcgcagaaga ggaaatacag aataaggcaa acaatttat tgaagtgca taaattgtc  
4981 tggaaaaggg cttcattaag aggtataata ctcttgatg aagtccttt tcattatggg  
5041 aggtaacctt tggaaaggga aaaaatgaat aaagaaatca ctgctttata ttgcagacta  
5101 tccaaagagg acaagcagag tggcgagagc atgagcataa gcacacagaa ggaaatgctt  
5161 atggattatg caaggcagaa tggttttagg aattgtcggg attatgtgga tgacggatat  
5221 agcggacta attccgacag agaagcattc caagaaatgt tggatgatat tcgtgatgga  
5281 aaggttgcgg ttgtaattac caagaccag tcaagactgg gaagaaatta tattgaaacc  
5341 ggtacttaca tggaaatctt tttccctgag catgggtca gatacattgc aattaacgat  
5401 ggttatgact ctgataagga cgaccattg ggaatgatgg cacccatccg aaacatcatg  
5461 aatgaaatgt atgcgagaga tacttcaaag aaaatcaaat ctgctttgca tacaaggaaa  
5521 atgcagggca agtacttgtg tacaacagct cttatgggtt acaaaaaaga cccgacagac  
5581 agcactcatc tgataattga tgaagagggt gcaccagtgg ttaggtacat ttatgattg  
5641 gcagaggaag gactgggact gactgtatc tgtaaaagac tgacagatga aaaaatcctt  
5701 aaaccaagtt gtcacaagaa ggaaatgttt gagcggttt tagacgatgg taaaatgta  
5761 gactgggata atgcgtatgt cagccagttg ttacacagtc ctacctatgc aggacatctt  
5821 gcagttgatt gcaagccgac aatttccatg aaaaccaaga agcgaagta tattgcattt  
5881 gcggataggg aaatcatag gaacacgcat gaagccatta taccgcaagc acaatgggac  
5941 agagtacaga caatcatatc cagccgaagc agcagtttta aactgaaaa aacagatgat

6001 gacaatatct ttcggggatt gttaaggtgt gcgattgtg agaggacaat gcttgtaag  
6061 gtggagcata aacggattag ggataatggt ctagacaaga cttttattg ttgcagtacc  
6121 taccgtaagt acggaagaaa tgcttggtga ggcataatc ttgaagcgag aatgctacat  
6181 gaagctgtcc ttgcagacat tcagagacac gcagagcttg cagttacgga tagagaggaa  
6241 ctggtaggc acattgctaa gagcttagat attaagctgt cagagggcaa ggagaagcat  
6301 aagagagcaa taaagcagtg taaagcgaga attaacgaga tagatgactt gtatgcgag  
6361 ttgtacgagg atttgtcaaa ggggcttatt cccgagcgta ggttcaagat gatgaccgac  
6421 agactggata aagagcaaga agaactgttg gaaaagctgg aacagtacga gagggagaaa  
6481 aacagtggga aagagcagtt ggcaaatac caagacttca ttgatgaggt cagcgagtat  
6541 gctggtatta cagagttgaa tttcaaatg cttcatcagc ttatcgaaa aattctagta  
6601 tttccgccg aagagattga cggcgagaaa gtccaaaaa tccaaattca ctacaaattc  
6661 atcgggtgat taggatgat tgagtagtga aatctattat taaatcacct acgaaaacta  
6721 accaacagat gctggtcgtg aaggtgagtt agtagcaaga tggataatag aaaaagcagg  
6781 ggtaaggaag ccactaaaga gattatggat ttcctcacag acagataagg ctattcttga  
6841 tggatttaga aatcttaagc caggggcagc ttacgagaat ttatataagg cagcagtatg  
6901 cagggcagaa gcagattgga ttgtagggct taatgtaact cgtgcttga ctgtgaagta  
6961 taatgctcag ctttcagcag gaagagtaca atcaccaacc cttgcaatga ttgtgcaaag  
7021 agaagaa

//

DEFINITION Integrative and mobilisable element IME\_7

CDS complement(1..1524)  
/color=9  
/locus\_tag="F41\_01422"  
/note="Serine recombinase, protein motif: Pfam:PF07508.7"  
/product="Serine recombinase [recombinase]"  
/ID=F41\_01422  
/protein\_id="gnl|SC|F41\_01422""  
/codon\_start=1

fasta\_record 1..7451  
/ID=F41|SC|contig000001  
/color=5

CDS complement(1626..1820)  
/ID=F41\_01423  
/color=1  
/locus\_tag="F41\_01423"  
/note="hypothetical protein"  
/product="hypothetical protein"  
/protein\_id="gnl|SC|F41\_01423"  
/codon\_start=1

CDS complement(1893..2837)  
/color=9  
/locus\_tag="F41\_01424"  
/note="Plasmid recombination enzyme Mob\_pre, protein  
motif: Pfam:PF01076.13"



/product="Plasmid recombination enzyme Mob\_pre"  
 /"ID=F41\_01424  
 /protein\_id="gnl|SC|F41\_01424""  
 /codon\_start=1  
 CDS 3393..4172  
 /ID=F41\_01425  
 /color=1  
 /locus\_tag="F41\_01425"  
 /note="hypothetical protein"  
 /product="hypothetical protein"  
 /protein\_id="gnl|SC|F41\_01425"  
 /codon\_start=1  
 CDS 4318..5013  
 /color=8  
 /locus\_tag="F41\_01426"  
 /eC\_number=3.2.2.9  
 /note="5'-methylthioadenosine/S-adenosylhomocysteine  
 nucleosidase, similar to AA sequence:UniProtKB:Q9KPI8  
 protein motif:CLUSTERS:PRK05584 protein  
 motif:TIGRFAMs:TIGR01704 protein motif:Pfam:PF01048.14"  
 /product="5'-methylthioadenosine/S-adenosylhomocysteine  
 nucleosidase [nucleosidase]"  
 /"ID=F41\_01426  
 /gene="mtnN""  
 /protein\_id="gnl|SC|F41\_01426"  
 /codon\_start=1  
 CDS 5057..5857  
 /color=7  
 /locus\_tag="F41\_01427"  
 /note="helix-turn-helix transcriptional regulator immR,  
 similar to AA sequence:UniProtKB:P96631 protein  
 motif:Cdd:COG1426 protein motif:Pfam:PF12844.1"  
 /product="helix-turn-helix transcriptional regulator immR  
 [transcriptional regulator]"  
 /"ID=F41\_01427  
 /gene="immR""  
 /protein\_id="gnl|SC|F41\_01427"  
 /codon\_start=1  
 CDS 5894..6409  
 /color=1  
 /locus\_tag="F41\_01428"  
 /note="hypothetical protein, ab initio  
 prediction:Prodigal:2.60"  
 /product="hypothetical protein"

```
/"ID=F41_01428
/protein_id="gnl|SC|F41_01428""
/codon_start=1
CDS      6583..7449
/color=2
/locus_tag="F41_01429"
/eC_number=2.7.7.-
/note="Aminoglycoside 6-adenyltransferase Streptomycin
adenyltransferase, similar to AA
sequence:UniProtKB:P17585 protein motif:Pfam:PF04439.6"
/product="Aminoglycoside 6-adenyltransferase
Streptomycin adenylyltransferase [antibiotic resistance]"
/"ID=F41_01429
/gene="aadK""
/protein_id="gnl|SC|F41_01429"
/codon_start=1
```

BASE COUNT 1862 a 1752 c 1760 g 2077 t

#### ORIGIN

```
1 cagcgtattc aaaagttcgg cggtcagttc tgttgattg acgcactctt tcatcaaggc
61 aatccattht tctgcgtctg cggcgttctg gctttcagtg gcgatagcgg attgaagctg
121 ttcaatcttt gtgtccagtt cagcctgttc gctctgttac ttcccggaca gcatagagaa
181 gttgtattct gtgatacggc ccgccgccca gtcctcatal atccgggcaa acagggtatc
241 gacttcggct ttccgcttct ccgctttgtt caactctgcg gcttgcttct ttctgicggc
301 ggctgtccc ttgtcattgg catttaacag ccgcttcaaa agccgttctt catcatgctg
361 taccagcctc gaccagtatt gcagacggga gaggacatag gcgtaaagca catcatagcg
421 gatataatgc atggagcatt ggcgtgtgcc ctgtccgtac ttgctacaat gataatggcc
481 gtaaggcttg ctgttctgcc tgttctccc ataggacagc gaccagccgc aatccgcaca
541 tttaccaat ccggaaaaaa tctgcgtcgt accatccttg cactttctgc ggcggtttgc
601 tatctgctcc tgtacctgcc ggaaaacctg ttcgctgata atcggctcct gcgtgttctc
661 taccgcacc cattcacttt ggggcttgcg tatctccgc ttgttcttaa aggaaatgtt
721 tgtttccgg tagtgatgg tatggccgat ataggtttcg tctttcataa tgccttgac
781 ctgggctatc gtccatgctg agcttttttc ctctggcgca cccgataga tgtttgcaaa
841 agtcccgtca cgctggaaat tgataaatcc cgggtgtggga acctttcca taatcagat
901 tctgtgata ctggccgcc ctctgcatg aatggcaagg tcaaaaatct tctcactat
961 ccagcgggtt tctcgtcga ttatcagctt gttttgatt tccgggtgtt tctgtacct
1021 gatgggagca taggcaccga tacgctgtcc tgtggcaaac ttcgctttga aagcggcctt
1081 taccttgagg ctgatatct tcgcaaacca ttcattaaac aggtttttga acgggacaaa
1141 atcggaaagc cttttctctg tgcctcatt ctccgaacg gcgatgtagc gcaccgctt
1201 ttccgggaac agaaattcca gatagtagtc catcatcaca tgttcccgc cgaaacggga
1261 aaggctttc gtgacaatgc agtttacttt tccggcttc acatctcca tcatgicgtg
1321 aaaatccggg cgttcaaagt tctccccga ccagccatg tccacatact caccgactac
1381 atgaagtccc tgttccttg cgtactgtg caggattgtc cgctgtgtt caatgcttac
1441 gctgtacca tagttttcat cgtcccgct taatctcata taaagcggc tgttgtaaat
1501 cgtagtattg taaggtgtt tcaccgttaa aaatcctct tcttaaagaa acaaccacg
```

1561 cttacaatac ttttgctcta tggcaattat atcataagcg tgggcgtggt atcaatgatg  
1621 ggctatcagg ttgaagcggc ttttctgcg gtagccgca ccacatctac aatcagatca  
1681 ccgaggggct tcccgctgc ggcgaagtgt tcggagattt ttatacgggt gttcccacat  
1741 acaaaatact gcgtgccgtt ctctgtttgt atgacctgcc ctgtccgggg cgtaaaaata  
1801 tcgctttcgc tttttgcat ccagtgctct ccatattcag tttcaaggt acaatgccgc  
1861 acaggggscgg cgaaaatttc tgcttatatc taccaccttt ctttactgt gtgccgctgc  
1921 tgccgtttca cctgcgccag cacttccggc gggatacggg caacgaaatt gcggagattg  
1981 tgtaattcgc tttccagcgt tggcgttcc atgcggctt tcatcttgcc ttgctcactg  
2041 gcctttgcc ttgctccag cttttgttt tcttcagca ggtcattgat tgtgacctg  
2101 tactttttca actgcccgga gaagtctcc atctgcggga accacttttt cagcatggag  
2161 agggcttctt ctttttctt tccggcgttc agcgggtaa tgccgtcaag ggcggcttca  
2221 atggctctgg cctgtttgga gagggaaacc gcctgttga aaagccgggt ggggatatgc  
2281 ttccggcctg tctgtctggc actctccca cgtccaagt cgggatattt ctccaccata  
2341 taggcgtgaa aatcgtctg cacttcgtc aggtttgcc ggttgccgat aatctccta  
2401 gcgcacaggc ggttgcctt tgcagcggga acaaaggta aatgcagggt gggcgttttc  
2461 tcgtccatgt gtaccaccgc cgacacgata tttcccgct ctaccggcc aatgaggaaa  
2521 tctgccccc tttggaagaa cgctgtatc tcctttgggg atttccctt gaaaaactcc  
2581 gggctggcgg ttatcagcgt atcgacaaac cgtgtactgt ctttcttgt ccggcatccg  
2641 gcctgtcga tacggctctg aatgaagtgg taatagcgtc cctccggctt gacgatatag  
2701 aaattgtatt tgctccggct tgtgtcaatg tcggggttc tggcgtattg ttcttctgt  
2761 ctttctgat gggcttccag cggccttgc gggttgccct tatgcttctc aaaccgaaa  
2821 attgcgtgtt gtgccattct gtcctttcc ccattcctt cctatccggg gttttcaca  
2881 gggaaaatcc cgccggaatt atctctgata cgataggaat ggaatggata taaataaat  
2941 atttaatct ttgtattct atataccgtc tggtttctg acttctcaag attgatttc  
3001 gcacttcata agtacggttt tcagtctcc ggcgtaccag aacgggattt ctgaaatcg  
3061 gtgtttgga caacttcata ggattttggg aaaatgcggg tgggctttcc acagccctgc  
3121 ttctggattt ccaccagtcc ggcgtattgc agtcccgcga ggggtttcac cgctttctgc  
3181 cgcccacagt ggagcaggtc aaccattca cagatggggg aatacaggaa aatccgtccg  
3241 cagtcatccg cccaccatt cttgcgggat aactctgtcc ggcgcaggat aaaggcgtac  
3301 agaaccttg cctcgttga caggggcttg aatgtagggg cttcaaagag gaaattgggg  
3361 agccgggtga agctgaacgc ttttccggc tgatggatat agatggattt tgcatagtg  
3421 cgtttgtgg acggttaaaa gcccgtttc cggggcggac gatactttat accactgccc  
3481 ccggtttggg gcttgcggag cctgataaat caaggctttt tctactccta actgtccaca  
3541 gcagacctcc ttttccgtc actttctgtt ttctgccgc tgtgaactct gacggcacag  
3601 ccggggcagt attttcccg gttggattg gggacgaaca cgccgccga gaccgcacag  
3661 catttcaagt cttatctcg gaaaatctcc gttccagcg ttccgtccag cggcaagacc  
3721 gccagcggga accacttaca gcagaccgag aaagaaaccg tctgcgggca ggtgcagggt  
3781 tccccatct caaggacaat gcagttgccg tctcacagc aacagcactc ccggcgtatc  
3841 aggttgccg cctgttctc ctgcgccgt gcatgcggg aaaggaacc gtccggcctg  
3901 cgtccagtg gcggcaagtc ttatagggg ttatctctca tgcgttccct ccattttgct  
3961 ttccgttgc gtttccccg aaaaggtttc ctgccccatt cctgcggcgt attccggcgt  
4021 tggcacgctc cccgcaact cgggacaact tgtcccgaag tgacctctgg acaaagtgtc  
4081 cagaagctgg ctcttgag tgcttccca gccggggtat tcctttcgg acggtcattc  
4141 tgtttcaag gtgccgttca tcgatgaact aaaataagtc tacacctaaa tgaccgtccg

4201 tcccgtatat ccataaagtc ggagatccgc ccgaaaaact gcctatttcc acgctctcgg  
4261 aattgtggta aaataaacat aaaaattggc tttcaagcca taggaggaca ataactatg  
4321 aaaaatcgga ttttatgtgc gggtagcga gaactcgccc catttttgcc cttgataagc  
4381 aactgtaaga taacggaaaa agctatgctg aaattccatg ctggacagat tgatagtga  
4441 gaagttgtcg cctgttttc cggcgtgtgc aaagtaaatg ccgcatagc cgctcagctt  
4501 ttgatagatg tattttgcgt ggatataatt atcaattcag ggacagcggg cggtagggag  
4561 ccagaacttg aaatattcga tacagttatc tccacagaag tttgttacca cgatgtagcg  
4621 ccagacattt taacggaatt tcatccgtgg atgaattctg tgtttttgt agcagaccca  
4681 aagctgatag atatgtcaaa gtctgctgtt gacaagcttt caacttctgg aaaggtagtt  
4741 tggggccgta tgtaacggg agaatcgttt ataaccgatg agagccggca aaaaataaac  
4801 gatgaatttg ctcccttgac ggttgacatg gaaactgcca gtagctca tgtctgctat  
4861 gcaaatgaca taccgtttat cgccattcgg tgtgtgaccg atactgaaaa acacagcgga  
4921 gttgataatt ttgacaaaa ctgtgcaaaa gcatcaagta tgccaaaga tattacggtt  
4981 gctttattaa gagaaatcaa aaagtcgtgg taagattgga tgatatttta gaacagagga  
5041 cagagggagg gagagtatgg ccctaactat tcaagaacga ctaaaagacc tgcgtgtgga  
5101 gcgaggcttg acgctggaac agcttgcgga gcagaccac ctctcaagt ctgcttagg  
5161 cagttatgag ggggacaact tcaaggacat cagccactat gccctatca agctggcaaa  
5221 gttttacggc gtgaccgcg actatctgct gggccgttct caaacaagaa atcaccaaa  
5281 cgccgatctt gcagacctgc atttgagtga tgatatgatt gaactattga aaagcgggct  
5341 ggtggacaat tctctttgt gtgaactggc gaccacccg gattttccc ggctcatggc  
5401 cgaccttga atctatgtga acggcgtagc gggaaagcag gtgcagaacg caaacgccat  
5461 tgtggacgct gtgagtgcaa cgattatgaa acagacaat cccggcttga ctgaccgca  
5521 gtttaaggcag cttatcgcc ccatattga gcagacagc ttttgccgt atgtgata  
5581 gcaggatata aacaagatag ccctcgacct gcgggaagcc cataaggacg atttttcag  
5641 tgtcccggag gacaaccac tggaagattt cttgcagacc gtagaggaaa ccaccagccc  
5701 ggacagcgac ccggagcagg cggctatgat gtttatctgc aagcggctca aactgaatta  
5761 taagaagctg tccgaggaag aaaagaagtg gctgaaaaag attgcacaga agtcggactt  
5821 gctgaaaaat ccaaagccac agcgaggacg gaagtaagag aataataaat cagattatat  
5881 ggaggtattg gttatgaaaa aatggttact gataattca gcgactgta tttgcgttg  
5941 tgccgctttt ttatatttct ttagttaac tccaaagga gataccatta ccagcagaga  
6001 aagcactatg aacaccgcaa tttcaaaggg gaatgaatgg actattgcaa aagaactgga  
6061 acttggcggg tatatcgtga gtggagcata tagtgcagat aataaatcta cactgccat  
6121 ctttgaacca acaggaaatg gagattacaa atttagtaca tcaacaacc gaaatagtga  
6181 tgagattatt gttggtggcg ttgcaataaa cggagaatgg tatgatttaa tttggttaa  
6241 tgggtgctaaa acagagtatg ccgaaatcac ttatacaata aatggacaag tgcaagatac  
6301 attgagatac agcacagatg atatggatat tatctcaatt aaaaaccag aaaaagagta  
6361 ttccattcat gtggttact atgacaatga tgaaataag tacgaataaa ttgttttca  
6421 tcgagaaaa atgcaagcca gccgagccag tcaacggctca agatgaacgg cgcatctcat  
6481 gcgcccggc tgacagtccc gccctcttt gctaaagggt aatcaaggcg ggaaagccct  
6541 aaaaatggtt cacacctatt tcaataattg gaggagataa aatgagatc agaaaaggaa  
6601 gtttatgata ttgtttgaa ttttcaaaa acagacaaac gcattcgcg gttactttg  
6661 gaaggatcta gaacaaatac aaatattccg cctgatgatt ttgagattt tgatattact  
6721 tttttgtta cggatatgga cagcttaca agtgatgata aatggctaga tatatttgg  
6781 gaaaggttga ttctgcaaaa gccggaagat atggaattat ttccagctgt agaaaaggga

6841 ttttcatatt taatgctggt tactgatgat gttaagatag attaacttt gctgccgctg  
6901 gaactgatag acgagatatt tacatgggat aaactggtaa agttactgtt ggataaagac  
6961 aaccgatcg taaagccgcc aataccaacg gatatagact accacttgca gaagcctact  
7021 caaagaatgt ttgacgattg ctgtaatgaa ttttgaata ctacaacata tgtagtaaag  
7081 ggcttatgcc gcaagaaat tcttttctgct attgaccata tgaatgatag agtacgaaaa  
7141 gaattgcttc gcatgatttc ctggctgatt ggtatcaaac agggatttca tttcagtttg  
7201 ggaaaaaact ataaatttat gaagcaatat gccccagagg aattgtggga acgacttatg  
7261 tccacttata atatggattc ctatccccat atgtgggaat cctttgaaca atgtatggca  
7321 ttgttccggg aggtttcgtc agaagtggca tgccagtggg attaccagta tccactatat  
7381 gatgaaaaaa tcagtaatta tgtgattcgg caaaagaaaa aatatggcat tgaagatgat  
7441 aacaataaa a

//

DEFINITION Integrative and mobilisable element IME\_8

CDS complement(1..1920)  
/ID=F41\_02236  
/color=9  
/locus\_tag="F41\_02236"  
/note="protein motif:CLUSTERS:PRK13413 protein  
motif:Pfam:PF00239.15"  
/product="Serine recombinase [recombinase]"  
/protein\_id="gnl|SC|F41\_02236"  
/codon\_start=1

fasta\_record 1..24717

/ID=F41|SC|contig000001  
/color=5

CDS complement(2314..3156)  
/color=10  
/locus\_tag="F41\_02237"  
/note="DNA replication protein DnaC ATP binding protein,  
similar to AA sequence:UniProtKB:POAEF0 protein  
motif:CLUSTERS:PRK08116 protein motif:Cdd:COG1484 protein  
motif:Pfam:PF01695.11"  
/product="DNA replication protein DnaC ATP binding  
protein [replication]"  
/"ID=F41\_02237  
/gene="dnaC""  
/protein\_id="gnl|SC|F41\_02237"  
/codon\_start=1

CDS complement(3153..3680)  
/color=10  
/locus\_tag="F41\_02238"  
/note="Replication initiation protein RepA , protein  
motif:Pfam:PF06970.5"  
/product="Replication initiation protein RepA

[replication]"  
 /"ID=F41\_02238  
 /protein\_id="gnl|SC|F41\_02238""  
 /gene="repA"  
 /codon\_start=1  
 CDS      complement(4417..4860)  
 /color=8  
 /locus\_tag="F41\_02239"  
 /eC\_number=3.1.-.  
 /note="DNA mismatch endonuclease Vsr Very short patch  
 repair protein, similar to AA sequence:UniProtKB:P09184  
 protein motif:Cdd:COG3727 protein motif:TIGRFAMs:TIGR00632  
 protein motif:Pfam:PF03852.9"  
 /product="DNA mismatch endonuclease Vsr Very short patch  
 repair protein [nuclease]"  
 /"ID=F41\_02239  
 /gene="vsr""  
 /protein\_id="gnl|SC|F41\_02239"  
 /codon\_start=1  
 CDS      5409..5738  
 /color=7  
 /locus\_tag="F41\_02240"  
 /note="Helix-turn-helix transcriptional repressor RghR,  
 similar to AA sequence:UniProtKB:O32236 protein  
 motif:CLUSTERS:PRK08154 protein motif:TIGRFAMs:TIGR03070  
 protein motif:Pfam:PF01381.16"  
 /product="Helix-turn-helix transcriptional repressor RghR  
 [transcriptional regulator]"  
 /"ID=F41\_02240  
 /gene="rghR""  
 /protein\_id="gnl|SC|F41\_02240"  
 /codon\_start=1  
 CDS      5758..6810  
 /color=8  
 /locus\_tag="F41\_02241"  
 /eC\_number=2.1.1.37  
 /note="DNA cytosine-5--methyltransferase, similar to AA  
 sequence:UniProtKB:P20589 protein motif:CLUSTERS:PRK10458  
 protein motif:TIGRFAMs:TIGR00675 protein  
 motif:Pfam:PF00145.11"  
 /product="DNA %28cytosine-5-%29-methyltransferase  
 [methyltransferase]"  
 /"ID=F41\_02241  
 /gene="haeIIIM""

```

/protein_id="gnl|SC|F41_02241"
/codon_start=1
CDS    complement(6857..7468)
/color=8
/locus_tag="F41_02242"
/note="TIGR02646 family protein HNH endonuclease,
Pfam:PF01844.17"
/product="TIGR02646 family protein HNH endonuclease
[endonuclease]"
/"ID=F41_02242
/protein_id="gnl|SC|F41_02242""
/codon_start=1
CDS    complement(7452..9101)
/color=8
/locus_tag="F41_02243"
/note="AAA family ATPase Predicted ATP-binding protein
involved in virulence, protein motif:Cdd:COG3950"
/product="AAA family ATPase Predicted ATP-binding protein
involved in virulence"
/"ID=F41_02243
/protein_id="gnl|SC|F41_02243""
/codon_start=1
CDS    complement(9193..11049)
/color=9
/locus_tag="F41_02244"
/note="Serine recombinase, protein motif:Pfam:PF00239.15"
/product="Serine recombinase [recombinase]"
/"ID=F41_02244
/protein_id="gnl|SC|F41_02244""
/codon_start=1
CDS    complement(11104..11367)
/ID=F41_02245
/color=8
/locus_tag="F41_02245"
/note="Stage II sporulation protein R"
/product="Stage II sporulation protein R [sporulation]"
/protein_id="gnl|SC|F41_02245"
/gene="spoIIR"
/codon_start=1
CDS    complement(11367..11597)
/color=8
/locus_tag="F41_02246"
/note="Seryl-tRNA synthetase ,protein motif:Cdd:COG4443
protein motif:Pfam:PF09901.3"

```

/product="Seryl-tRNA synthetase [RNA synthetase]"  
 /"ID=F41\_02246  
 /protein\_id="gnl|SC|F41\_02246""  
 /codon\_start=1  
 CDS        complement(11643..12497)  
 /color=10  
 /locus\_tag="F41\_02247"  
 /note="ParB/RepB/Spo0J family protein Plasmid  
 partitioning protein parB, similar to AA  
 sequence:UniProtKB:Q83AH2 protein motif:CLUSTERS:PRK13832  
 protein motif:TIGRFAMs:TIGR00180 protein  
 motif:Pfam:PF02195.12"  
 /product="ParB/RepB/Spo0J family protein Plasmid  
 partitioning protein parB [partitioning system]"  
 /"ID=F41\_02247  
 /gene="parB""  
 /protein\_id="gnl|SC|F41\_02247"  
 /codon\_start=1  
 CDS        complement(12506..13471)  
 /color=9  
 /locus\_tag="F41\_02248"  
 /note="Plasmid recombination enzyme Mob\_pre, protein  
 motif:Pfam:PF01076.13"  
 /product="Plasmid recombination enzyme Mob\_pre"  
 /"ID=F41\_02248  
 /protein\_id="gnl|SC|F41\_02248""  
 /codon\_start=1  
 CDS        complement(13996..15021)  
 /ID=F41\_02249  
 /color=10  
 /locus\_tag="F41\_02249"  
 /note="Replication initiation protein RepA"  
 /product="Replication initiation protein RepA  
 [replication]"  
 /gene="repA"  
 /protein\_id="gnl|SC|F41\_02249"  
 /codon\_start=1  
 CDS        complement(15480..15650)  
 /ID=F41\_02250  
 /color=7  
 /locus\_tag="F41\_02250"  
 /note="RNA polymerase sigma factor Sigma-70"  
 /product="RNA polymerase sigma factor Sigma-70  
 [transcriptional regulator]"



/protein\_id="gnl|SC|F41\_02250"  
 /codon\_start=1  
 CDS complement(15734..16159)  
 /color=7  
 /locus\_tag="F41\_02251"  
 /note="RNA polymerase sigma factor Sigma-70, protein  
 motif:CLUSTERS:PRK12522 protein motif:TIGRFAMs:TIGR02937"  
 /product="RNA polymerase sigma factor Sigma-70  
 [transcriptional regulator]"  
 /"ID=F41\_02251  
 /protein\_id="gnl|SC|F41\_02251""  
 /codon\_start=1  
 CDS complement(16254..16766)  
 /color=7  
 /locus\_tag="F41\_02252"  
 /note="RNA polymerase sigma factor Sigma-70 region 4,  
 protein motif:CLUSTERS:PRK08583 protein  
 motif:TIGRFAMs:TIGR02937 protein motif:Pfam:PF04545.10"  
 /product="RNA polymerase sigma factor Sigma-70 region 4  
 [transcriptional regulator]"  
 /"ID=F41\_02252  
 /protein\_id="gnl|SC|F41\_02252""  
 /codon\_start=1  
 CDS complement(17479..19398)  
 /color=2  
 /locus\_tag="F41\_02253"  
 /note="Tetracycline resistance protein tetM from  
 transposon Tn916, similar to AA sequence:UniProtKB:P21598  
 protein motif:CLUSTERS:PRK13351 protein motif:Cdd:COG0050  
 protein motif:TIGRFAMs:TIGR00484 protein  
 motif:Pfam:PF00009.21"  
 /product="Tetracycline resistance protein tetM from  
 transposon Tn916 [transcriptional regulator]"  
 /"ID=F41\_02253  
 /gene="tetM""  
 /protein\_id="gnl|SC|F41\_02253"  
 /codon\_start=1  
 CDS complement(19765..20139)  
 /ID=F41\_02254  
 /color=9  
 /locus\_tag="F41\_02254"  
 /note="Transposon-encoded TnpV"  
 /product="Transposon-encoded TnpV"  
 /protein\_id="gnl|SC|F41\_02254"

/gene="tnpV"  
 /codon\_start=1  
 CDS complement(20120..20368)  
 /ID=F41\_02255  
 /color=10  
 /locus\_tag="F41\_02255"  
 /note="ATP-binding protein AAA family ATPase helicase"  
 /product="ATP-binding protein AAA family ATPase helicase  
 [helicase]"  
 /protein\_id="gnl|SC|F41\_02255"  
 /codon\_start=1  
 CDS complement(20401..22245)  
 /color=8  
 /locus\_tag="F41\_02256"  
 /note="Restriction endonuclease Helicase-associated Z1  
 domain, protein motif:Pfam:PF10593.3"  
 /product="Restriction endonuclease Helicase-associated Z1  
 domain"  
 /ID=F41\_02256  
 /protein\_id="gnl|SC|F41\_02256""  
 /codon\_start=1  
 CDS complement(22257..23408)  
 /color=8  
 /locus\_tag="F41\_02257"  
 /note="NgoFVII family restriction endonuclease, protein  
 motif:Pfam:PF09565.4"  
 /product="NgoFVII family restriction endonuclease  
 [endonuclease]"  
 /ID=F41\_02257  
 /protein\_id="gnl|SC|F41\_02257""  
 /gene="ngoFVII"  
 /codon\_start=1  
 CDS 24052..24363  
 /ID=F41\_02258  
 /color=1  
 /locus\_tag="F41\_02258"  
 /note="DUF4258 domain-containing protein"  
 /product="DUF4258 domain-containing protein"  
 /protein\_id="gnl|SC|F41\_02258"  
 /codon\_start=1  
 CDS 24369..24596  
 /color=8  
 /locus\_tag="F41\_02259"  
 /note="Type II toxin-antitoxin system MqsRA family

antitoxin MqsA, protein motif:TIGRFAMs:TIGR03831"  
/product="Type II toxin-antitoxin system MqsRA family  
antitoxin MqsA [toxin-antitoxin]"  
/"ID=F41\_02259  
/protein\_id="gnl|SC|F41\_02259""  
/gene="mqsA"  
/codon\_start=1

BASE COUNT 6783 a 5586 c 4132 g 8216 t

ORIGIN

1 gccatcataa caatgtaaa aatcgttcga tagctgtttt gcactcgttt gagccggtaa  
61 attcggtaaa tattggtgta tcagcgccat gatttcctct ttcgatttta caatcttgta  
121 tggtttcagc gaattatccg tatcttcag aatccccagt tctttcatca gatggatata  
181 aggcaagata cttgttttcg ttttctaaa tccaatgct gtgatatggt ctgacaagta  
241 ttttgcatg gatatccac gttcatctc tataatcagc ttcattacaa gagcgattac  
301 agtattttcc cggcgattca tctcatcagc aggactgtaa ttgattaaat cagacaaacc  
361 atattttaaa gtgattctg gcattccctc tttatctacg tcaattcgct caatcaacag  
421 tcaatatct cttcggtaaa gagttccacc tgcaatgatt ttatcaacta catccaatgc  
481 gtttctcaat ttgtccttta catctggtgt ttctatagta gtttcgtca gttcttttc  
541 ctgtatctcc aaaccatgaa tctgtgccag taaatccttt tgcattggaat cataggtttc  
601 gtggatcaaa tcttcatttt cagatgctat ggataaatct tttatctct ggtcaaaaag  
661 taccttcaac tgatttttc gattttgaa ttcttctga aggtcctgct gcttttctc  
721 cagcgttttc tttctgcct caaaatcct catatcgtac gtggaaatca cttcacaag  
781 cgcctctctg cacatcttaa tataatcag cacatctca atcaaatcat tttcttcaat  
841 cagatgtgct tttcacaat atcgtctgcc tttgtatta taggtggtac aaatataata  
901 ttttcttct ctgctggatg ttgacgctt aatcgggtgc aaacgacttc cacaatcttt  
961 acaaaacaaa cagcttcaa aaggattggg aatttctgaa ccatccatt ctccccgtg  
1021 tccacgatag ttgtgcatg tacgctttc cttaattcc tgtacaagag aaaacgtggc  
1081 tttatcaata attgtcggat gatgatcttc aaaaatacat tgttcttct ttggaacacg  
1141 tttatcctg ccatgtaccg tgttctggc acgtttctc aaacgaaatg ttccaatgta  
1201 aaaatcatta tctaataatt cttcaccat gctgtcagac caattggtgg cgactttct  
1261 tttgctcagc cgaccttct caatttctc tttccgctgt accatagagg gtgtcggaa  
1321 acctgatcg gtcagataat ttgctatctt acgataaccg gaaccggaga tataaagatc  
1381 gtaaaccatt tttacaaatt ctgcctcttt gggaacaatt cggataatgc tcttatctt  
1441 cgcacccga caatatccga aagggtggtt tgcataaga gtccttctt tttgtctagc  
1501 tccgattgct cttttgatt tctactggt atcttttaca taacgctcat tgaacctgt  
1561 ttttaattca atggtgtcgt cgctggaatc aaaagaatcg taattatcat caatgacaat  
1621 gagatgtttt ccgcttctc gaaattcatc caaaagcaaa agaaccttcg cattatgct  
1681 gccaagacga gagaaatctt tcacatatac ggtatcaata tctttatcta aatcagccat  
1741 catctgttga aatcctggc tgtcaaaaat ataactgat actccgctcat cttcatacca  
1801 tcggtcaata accattccat ggtcagatgc atactgattg ataattaact tctgatttc  
1861 tatagaaaca taatttcgct tatcgtcatc tcttgaaga cgcacatata cagcattcat  
1921 gtctcatcc tttctgaaat attatttata gaataatgta atataattat atatcgaaaa  
1981 atctttttcg taaacggatt atcatataat tttacaatga attatattat tgtgaatag  
2041 aatatgggc gagagaatgt ctcccgccca tagaaattac tgattgattt cttttatag

2101 gtttcgaatc aacgctttta ttcattatg tatattttta tccggctgtc catctgcaaa  
2161 cgtgacaacc cgaaaccta ttttcgtata tttctccta tctgcctcaa agtcttctga  
2221 agatgtataa tctgttcgcc acaggtaata tgtaggtttc tgcagagcta tcacactctt  
2281 tctatttctg atgtctatac taagatataa acatcagatt atttttgtgc ctgtctgctc  
2341 tataatattt tcagtctgac ttgattcggc agtagcgaaa aaggttttca ttttctcat  
2401 ttttcatgg gcaatatcac tccgatagct agaaccgcca acatataacg gaacacacat  
2461 ttctaaaata cgatcgtaaa ttcgtttctt ttctatgttc gtttcttctt ttaattgttt  
2521 tatcggaaga ttggtagta cgattaatgg tctgccggag cgatatcttc gatcaattac  
2581 gctgaatata attccaagag catactcgga acttcgttct gtgccaaggc catccagaat  
2641 taaaagttca tattttgcca gagcattgat atattctgtt ttatcctcta atggaaacat  
2701 atcatcaata attgtattaa aatttgcct cttcacagta atttctgat tcaaaagtgc  
2761 gttggcaatg caaccggcta tgtaactctt tctgttctt attggtcccc acaagagaaa  
2821 accaatatga ttttcttca tatcgtcca gttcgtgta tattcttttg ctttctgat  
2881 ggtggtagtt tcttctgcca gttcaaaatt ccaatcatac attcgtgatt cttcaaaaca  
2941 gatttttcta ttttctcca ctaattcgca atgttctctt tctttatatg cttttcttc  
3001 tgcttcacgt tttgacgga tacatgcaca ttgtctgaaa tgtttttca taccaagaat  
3061 actgtctgga ggaaaatag cctctacagg ttctccaca atcttgcaat atgtaatcc  
3121 atctgcacct aaatatgtgt tttctgctt tatcatagac tctgcctc ctcattctg  
3181 taatttact caatcttatt actaaaatta tattttctt ttactttact aggtggcaca  
3241 tttccgacca tagaagaggc tgtttccga ctgaatgaag gacagctttt catcctcatg  
3301 gaagttgat tttcgtctgt cggctttaca tccggttcag aatcaactc tatacagggg  
3361 attcgcatac ataatgatt tggtttgaa aatcctccgg aactgcgaat caacaatcca  
3421 tactcatcta attccttcat ggcagctttt acagaagtac aacattttcc ccattttaaa  
3481 gaaatttctg taattggaaa gacgaaatat acataccctt cttcattgag ccaatggttt  
3541 ttcttgtaaa ttctggctt gcatataac aacatataaa gtaattttgc atttgagag  
3601 agtggtagct ctaacaaaaa ttaggggaac tgataatagg gaagtatctt tccgtttcc  
3661 atcatatatt caaatttcat attttcttt acctttctga aaaattaagg agacggatgc  
3721 cggctttccc aaagagattt tatgctttat aaaaattctc tttgatatc tctcatata  
3781 acgaaaggaa aaaggctcat ttacagggt acaagaaaaa aaattataa gagcaagatc  
3841 caccatgtt taacgttatc gcgtttccgc ctccgttcac cttatgggtg ttctctgat  
3901 ggggagtgac aattcccat acccttgctt atataattgg cttacaaaag aattgttctg  
3961 catcaccatg tgtattttca aaaagaaaaa aacatccaat tacttattga atgcctcaaa  
4021 atagaattat gtaattatg atattttgct gcgtacaccg ccggtgtagc taataaaaaa  
4081 gtgggtgtgg ggaggcgaca gttcccagc aagataaaac tccgaaatat tacttatatg  
4141 gcagaatggc gatattgtaa tacggggtgg atcttgctt taataattg aaaaagaaaa  
4201 aatgctgaaa atactatttt caaagatacc tgatattcag agtgtctcag atttttatg  
4261 atgcttttac aatagattc tgataattg cttatgaga aggtgggcaa gaatgagccg  
4321 gtttgattg cagatgaggt tccgttgata tctaaatag acaacaatgc atatccacca  
4381 aattcattta tacttggcgg atgtgatca actatattat tcaagttctt gactttgcat  
4441 ttttaattca aaaatagttt ctcaataac ccgtacacat tcatctgtat tatttttat  
4501 atcttttccc cagaatctga ctacagtcca tcccataaat aacaatttct tattaatctc  
4561 atcgtccctc tcacggtttc tggaaatctt ctccaccaa tactactgt tatttcttt  
4621 ttcaagtctt ggttttaaaa cctcccagtc ttttccatga aaaaactccc catcaaaaa  
4681 aatagcaatt ttactttg tcaatacaat atccggtttt ccaggaagat tcttataatt

4741 ctttctatat ctatcctt tattcataa cgccttctt aatattgtt ctatcttgt  
4801 attatcagac cgtatatgtt gcatatctt cttcttgg cctgggtca aattatccat  
4861 atcgattacc tcaaaaagac ttcattcatta tgatatcaa gaaatgattt accctgcaaa  
4921 aatttatctg gaagattaat ttgtttctt tcatatccat agaactattc tctgtctgt  
4981 ttatccattt caacattttt catttttagt ttactatcta atgttattaa tcctttatcg  
5041 aaagccttat catgtaatga atttaaacaat aaacaattac atagattcgt tcttcagtt  
5101 tttcgtcac agactctcca cagttaata tggcttgc aaacaagtc tgatttttc  
5161 attcccatta tgtaacattt actccattgc gatttgcct attatttcc tttcataat  
5221 gtatattatt atctgaaatt tatatctcac attacaata tactatatca cattttaca  
5281 gcaagttatt ttttaacac acaaattctt atagttcata tttcgtctc ttttggcag  
5341 cgttttatta atttttatt gacattaggc agcgacgtg ctatacttc acaaggggag  
5401 gagagaatat gtccaattt ggccaattt taaaatcaa aagagaatct tctggattat  
5461 ctctgaaaaa attaagtcc gcaactggaa tcaagtacac tgaatatta aaaatcga  
5521 atggtaccg taaaaaac agctgggaac atctttgtca aattgcaaat gcattaaatt  
5581 ttcaccatt tgagatttta ctaacgtg gatacatatc tgaatgat attcatccac  
5641 cattgcta atcagtgacta gaggattga atgaacaaca actcaatata gttcaattat  
5701 tcgttgattt tatcaaaact caggaaaaa ctgtctgaac aattaaggag gctactatg  
5761 caatatagat taggagaatt attctgtgga ccaggcggaa ttgcatgggg tgccactcac  
5821 gcaaatatag gcaattctaa ttttcaatt atccatgaat gggcaatga ttatgatgcc  
5881 aatacatgcg aaacatatag acacaatatt tgcctcaacg aaccacagac cgtatccat  
5941 gaagatataa gaaaattaga tatgaataag ctttctcta ttgacgcatt ggctttgga  
6001 tttcatgca atgattatag tgtttaggt gagcaaaaag gaatggatgg cacattggg  
6061 ccactttact ctatggtgt caaagctta aaactgttca gacctatgt gtttctgca  
6121 gaaaatgttg gtggattaag aagtccaat gaagtaagg cacttgcaa aatattaga  
6181 gaactgcgag gcacaggata tacaattact cctcattat ataaattga agagtatgtt  
6241 attccccagg caagacatcg ttaataatt gttggaatca gaaatgat tctgtggaa  
6301 tcaaggtc catccccagc acctatgct aacgttaata acacatgctg aaatgctatt  
6361 gaaaatccgc cgattctca tgacgttat aataacgaac ttacaaaaca atccaagca  
6421 gtactgagc gattaaaaca tataaacca ggacaaaatg ctttactgc tgattacca  
6481 aaagaattac aactaaatat aaagggtgca aaaattagtc agatatata acgtctgat  
6541 ccacaaaac catcttatac cgtactggc agcggaggcg gtggtacaca tatctaccac  
6601 tggtcagaac ctctgact tacaaccgt gaacgtgcc gattacaaac attccagac  
6661 tctatgaat tcaaggacc aaaagaaagt gtcgcaagc aaattggtat ggcggtcca  
6721 tgcaaggtg cgagattat tttgaagca atacttaact gtttgctgg tattcctat  
6781 gaatatgtg acgcaaatat taatgaataa gtcaaaggc aagtagtatt ttaattaa  
6841 tcttgccctt ttctattat acgtaagtac ttatgactc taataatc tctttgcct  
6901 tgcctaatg tcgtccgct ctaattgtt cccataatat ttgtttgcc ctttctta  
6961 catgacaatt ttcccctag ccaacatat ccattgtatt tctgtcttc atttctcac  
7021 ttctagtaa acctgaagat atacgaatta ttgcacctc actttcaaaa taatgatca  
7081 catcatcaa ataaggatgc acgattgaa atgtactg attgtagtaa atattttca  
7141 attctattgt atcttctt cttttttc aagaactatt gcagaatga caagacattg  
7201 caagattttt tgtgtatata tcaaacctg gatataaat tctcggagca atatgtcaa  
7261 tttcccct tgatgtccct ctagtttta atccacaata tacacattt ccattctgcc  
7321 ataatagcaa ttgcttctg atacttct taatttctt atttatctt ttccagaat

7381 tccagtctc atactggga attccaagtc ttcttatata tttttatgt actctagaat  
7441 atttgacatg attattcaga ttcaacattt cttatgtact ccttcgcttc ctcaataacc  
7501 ttattcaaag gatccgtatt atccaaaata tatttagaca atttatcata taaatctcga  
7561 atatgatcta actcttcttt ttattatta cttatggcat ataataattc ccgcacatcc  
7621 atatcaaaat aataattcct aaatgtcctt acaccaaaaa tattatacaa gatattttca  
7681 gcagaccatg catatgtact ataatccaaa gtcaagaaat gctttcccc tcatctaca  
7741 tttaccgtaa tcaatgaaga attttcagga ttcaaatccg aaaccatata atgcgaatga  
7801 gaagcaataa taaaatggca agaattatat tctgcaaaaa cctttttcaa aaaactaata  
7861 tacttaatct gccaatagg atgtaaactg atttccggtt catcaattag aactatagaa  
7921 tttttgctta tattattaa tatattagta aacgaatata atatatgttt ttcccagaa  
7981 ctagcctctt caaatgaata tcttttcca tttttgtata gatttaattg catattctta  
8041 aatacctta aattagataa tcctttgaaa tatatgtagt cactggctat tttttgagc  
8101 tcatcttctg atgtattcat atcaaaggat actccaaata taattttact tttgtattta  
8161 acataggaac tattcttctt aatcccatta ataaaatctg ctaattctcg atacgtttca  
8221 tccgtatacc gctttaccgc atcgcttcta taatcttctt tctgtactat ttctcgcca  
8281 taccctttaa gtttttatt caaatcatct gcaaagaaat ctctccccga catttcacac  
8341 tcaatactta ttcagcatc aatacataaa aactccgaaa gcctattaat aaaattccat  
8401 atttttccat ttactgctaa gttcaaaata gaatctgcca ttttattatt cattgaacta  
8461 gtccacgatg cattagatgt cattctcacc ccaaatatt catatatact attcgctct  
8521 gtagtactg actgtttgaa tggaaatttg tcatttaaca taaatgatac tgcaagagcc  
8581 ttggttggca aaatagactt atcatatttt tctaacaaaa caccattctg atgtataaaa  
8641 atttgtctat ttagaatttg tagctgaatc aattccccat ttatagtata tgtaatctca  
8701 taacgagagt atttcatttg tcctaaagca ttttgacttt caatggcatt aaaaatttct  
8761 gctaaaattt tcaatataaa actttttcca gatccatttg ctccaatgat caatgatgta  
8821 gttggttcat tactttatc attcaattct tcagagaaaa aacgtatatt acaatgttct  
8881 tttcaccat ctcgtacaa taatgagata agtttgaatc ctgacattc cactcatca  
8941 atcttttgaa cttttcatt ttcgtccgaa atattgaatt ttcttctttt attatcatca  
9001 tccccagata tgaactcaat tttatagtc ttatcatcat atatactaac tacaacataa  
9061 tctcctctt tgcattggt taactcgtac cattcataca atactttta agaaccatta  
9121 ccctgaaact gcttagcaaa atcccttta ctttgtgac cagctgcctt taattcatat  
9181 tcttgccat tatcagtcgg tcatttttg cggacagttc atacatgcta tcctttctg  
9241 ttctctgctc ctgcgtttg tctcgttga tttctcctc cgtatcttct tggcacaagc  
9301 aggacaatac cttgatgac cagagcccgg gacatattca acgccgcaca ccgtacaatt  
9361 tttagcgggc atgtctgcc accgtttgt aggtatgata tgtaattcat cgacaaagcc  
9421 gatgaattta tagtaactt tgatttctg cttactgtt ccgtctgcca tcttctcacg  
9481 ctccgaaaca agtatcttgt ctatgagtc gttataact gttgatcca gttctttta  
9541 gccttgataa tttcggataa gggcgaggaa gtcacggatt ccccgatgatt tctcgtagct  
9601 ttcattaaga gttccgtca cctcttcag ccttgcttca atttcaagct gctctttctg  
9661 gtattcccc gacatcatc caaattccg ctcgtaata cgctccatga cttatcctc  
9721 gtagagagag gaaaacagcc tgtccagttc cgcaaggcgt ttgtcagct tcttacgctc  
9781 tttctctaat gtttcgccc tgctctggtc tgtttccgtg agccgctttt ctatggcct  
9841 gaccgcctt tcatcattca ctgcatatc cgcaaacag ttgatgtcgg caagaacggc  
9901 attgaataaa tccttgctt ctatattgtg ggcaactac tcgcttctc cgtttcttgc  
9961 ataattatta catgaatact gtacacagtc gataatctct gggcgtttc tctgtgtac

10021 gttcattgcc cgagagcac atccgagtc cacacacttg ataacgcctg caaaaatatt  
10081 taaaaatcct ccctgttct gtggaagcct acgacttgta ataagctgtt ggacaatc  
10141 aaattcctcc tgcgtgacta ttcctcatg ggtattgggt atcacttccc atttctcggg  
10201 cagcttagag gggcgtttct tgcttttcat attggcggca atccgtttgt agctacaag  
10261 atttcccgca tatatcgggc ttcttaaaat gtcctcacg ctgttccac tccaaatata  
10321 gcgtttgtcc tcgttcccct caaaatgacg ttcaaagcct gtttcgccac gtcgcccgc  
10381 ataagcggca gggcgtagga tatgctgtt attaagatgt ctgcaaattt tggcaactcc  
10441 attcctttt aatgcaaggt cgaatatctc tttacaaca tgtgccatt tatcatctat  
10501 cagcagatgg ttgtgtcgg cagggtcttt gatatagcca taaggggagg tagttccat  
10561 gaatttccc tgtgaaacc tcgcccata tgcgatttt atcttaacag atatgtcagc  
10621 ggcatacatt tcgttataaa tgttgcggaa aggcgtgatg tccatagcag atttattca  
10681 ggtatctacg ccgtcattga ccgctatata cctcacgta tgctctggga agaaaactc  
10741 cagatataac ccacaatcaa gatagtttct cccagacgg gataaatctt tcgtaatcac  
10801 gcagtttacc agaccgttt caatgtctt tatcatattc tggaaacttg gtctttggaa  
10861 attgtacca gaataacct cgtccacata cgttttgct atgtccatc cctgctttt  
10921 cacataatcc gtgaggatgg atttctgtgt cgcaatgctc gactctcgt tatccgtacc  
10981 atcgtctta gataagcggc aataaatgcc gactaaatag attttcttt ctctttgat  
11041 tcctgccata ctgtaaaacc tccgtatctg tcctatctgt tttcatgtcc cattgcgtac  
11101 attctaagcg gacagcccct cattgtcga ggtgtcgccc tcggcaatct tcttccgaat  
11161 atcctcggag ataatcggga caaacgctc tgaacggtc tgtgtgccga catattcacg  
11221 gctgattatc atctgcactg gtgctttgg cacgatacgc tttctcttt tatctgctt  
11281 cttatcctcg ccatactta aatcttctt tccagacagg gcagggaga gtttggaaat  
11341 gtccccgcc tgccaatcag ataccattaa tctcgtgt ttaattctt ctgtaatgct  
11401 ttaaggagt cgcgcccct atcagcgtc agcgtgattc cttgcccga ctttcacgg  
11461 ttcgggaaa agctcggat gtcatactc ggctttcc cattccatga aatgagattg  
11521 atttctttg ttagccact gtcgcccga gacaatactg cgatttctt tacgattca  
11581 tactggattt ctctattct ccaacctca actctctgta tttactccc gaaaaagaa  
11641 gattagcggc tgtcacggtt gcgtttctc tgcaactcac gtcctaaaag tttgatgat  
11701 gtttctcca tctgctcgg cgtgtgttc ttcggaaagt atttttcag cttgctgtg  
11761 ttgattttca aggttctt ctggttccc ttttctccg tcataatcg caaatatcga  
11821 tccatgcaa gccgcccgt ctggctaac tgtttcatcc gctgtgctg tgagagtga  
11881 ggcgttgctt ctcgctctc catcgtggca aagaggttt cctgctcgtc tttctcaag  
11941 aaggacagt ccaccgagg cgtgaggcg atttcccct cgtccaccat ctgcaaaatc  
12001 ggcggtatca gttccgtcag gcggataaaa cgctgcacgg tcatcctgcc cacgccgaag  
12061 ccctgtgcca cttgtcgtc cgtccgcaac ttcgtcaca cttgtgacga ggttaagtct  
12121 gtgcggaac cctgccgtt catggcttc gatttcatct tgaagcaa cgcccgtcc  
12181 gatggcagga tatttctcac ctgcaaattg ctgtctaca gggatgatg ggctcgtca  
12241 cggctaaagg gcaggacaaa cgcaggcacg gtatttatcc ctgcaagtc agaagcacgg  
12301 acacgccgt gtctgcaat cactcataa ccgtcccgt ccttttcgg gcgtgtgatt  
12361 atcggcgtga caatgcaaa ttcctgatg cttccgcta actctgacag tgtttcatct  
12421 tctgccat gaaacggatt gtcgggaaac ggttacaagt ctttggctt taacacctta  
12481 aaatcgtt tcttattca catatctacc tttttcgc tctgcttca tgattttct  
12541 gcaattctc caacactcg ggcgtattt ttgacagcag ccgccccatc tgctcgttg  
12601 ttctctgcaa ttcaaatatc ttctgattc ctttctcac ctttagttcc tgctctact

12661 tttcatcacg catacgcccc gcatagtctg attcctgccc aattctctct ttcaaactgt  
12721 cgatatacgc ctgctgtttc ccgatttctc tagagaattt ctccacgtct ggcagccatg  
12781 cagagagtaa atctaacgct ttatcccttt tcttcctgc gttaaaggcg ttgatgtcgg  
12841 atagggcaga cacgatttct tcatactggt tatcaagcct gccgcctaat ttatagagcc  
12901 atgtggggac gtgtttccgc ttggtttcca ttgaggactg cccccgttca agctgattcc  
12961 accgtgagga catccgctca tggtaggcgg tctgccactc ggataatgat ttctggttgc  
13021 ctaagatagc tttcgtgac agcttattgt ctggcgtaat cggcacaag cagaggtgca  
13081 tatggggcgt tctctcgtcc atatggacga cagcggagag gatattctgc ttccaacac  
13141 gctccgaat gaagtcaaga gccgtctgga aatacgttt ttgttctcg ggcgtaact  
13201 gttcataaa ttctggtgaa gctgtgatga gctttccac catcatcacg ctgtctttc  
13261 ttgtcctgca ccccgctcg gctaccatgc ggtaatctc tttctgtag gtgtactttg  
13321 gtgggtctat gagatggtaa ttgttttag agcgttccat atctatatct gggtgtctt  
13381 ttaggcttc tttctccgc tcgttggc attcacaagc cgcaacgcc cccgctttc  
13441 gtttctgaa acgcaggatt gcataaggca taggcggatt cctccttct ttcggcgggt  
13501 gaccgtcctt tggggtgaca gcggtgacgg tggtagacgc agtttggga taccctgc  
13561 cgactccgc aactgtcacc ctacccctc gcatgacggt catgtgatg atgacggtg  
13621 tttgggata cccccctgc aagagccgtc accgtcatgc cgccattct ttatccgaag  
13681 ccgtaaggcg taggatagca gggcacagcc ctgccttaag ggagtccaga gggaactct  
13741 ggcacacgac ttgcagggc aaagtgtagt gtgttacacc ctgtaaaccg agtcgaaaa  
13801 atcggaatga ttttctgac cgcaggggtg gtttacacg accgaaaagg gcgagtaaat  
13861 ctacgcctg cattttcgt ttacgggtg ttctccgta gggatgacag cggcagggt  
13921 tcctaaaatc actgtacca ccgtactgc tgcacccgc agggcagagc cgccagctt  
13981 acatggctt aagcgtcaat gacagtaaca ggggggtatc ctaatatgc tgcaccacc  
14041 ataccgctg tcaccgccc tcctgcaag ggcaatccgc ctgccgtct tctgcggct  
14101 gtactgtag cagatacgg tctcgttaa aaatgtggtg cggattcat tcagccatt  
14161 cgtaatcacc gtgggtatg tttcgtttc cccatagcg gctaacagtt ccgttccgt  
14221 gcctatccat tcttcttat cctcataaa atccaccaac cgaaaaagga catctggtat  
14281 cgtttcttc gcaagctgct cctgcgtttt ccgctccaca agctccaac ggcaatcacg  
14341 gaaacgcagc gtgtattct gataaggcgt gtcctgcc gtcacataca gttggcgggt  
14401 gtcagacgca cgttctct tttccagaac aaaggtagcg tccgactcc ccgttaatcc  
14461 tgtcgtcca gacacctgt tgaacacgct gctgtcattc tgcttcgga tgtggtgac  
14521 gacaatgacc gccagagagt gcctgtcggc aaagtcttg atgagggaga tgtcccata  
14581 gtcgctgca taggcattgt ctttgaagc tgtacggact ttctgcaagg tatcaatgac  
14641 aatgagcctg ctgtctgggt aatctttcag ataacttca agctgcacga taagaccgtc  
14701 tgacagctt cagcttgcca cggcaaatg gagccgccg cttgctctg ccgtcaaagc  
14761 aaataactg tcctgtatgc ggcagaact gtcctcaagg cagaggtaa gcacatgcc  
14821 ctccattgtc ggcatatccc ataaaggat tcctgagc acgcataagc atagctttag  
14881 catgagccag ctttgccta tcttctgta gccgcagaac agcgataagc ctgtcggat  
14941 aaggctgtcc accacaaagg atggttctc aagcggttca taaaggagcg tttcggcgtt  
15001 gactgtctgt aacttctgca tggcttct ctttcgggc ggtgtctttg tttcgttg  
15061 acataggcgt tgacctcct aaaaatagat ttactccac ggaaaaaagt gagagtatg  
15121 aatgcccca atccacaca aataaaaaac agatttctt ttcgggcggg gtcggtcacg  
15181 gttggagata tttctcaat ttccgctt actttctct tgcaatcgc aacagattc  
15241 tgtattgccg aagcgggtga atgtccata gcggcgatt ggtaaaaatt gaactcatac



15301 tcgtagtaga gcaggaaacg cgcctttgt atctctggaa ggctccaac cgccttatag  
15361 agcgtttcat tccgttctc ctcaaccatg cgttcatcaa ggctcttagg cacacgcaac  
15421 gcccgctctg aaagggttc gtccatacc tcgttaaact ccctgtgccg ctctgccat  
15481 tagaaaagat tcctgttctt gcgctccatc tgccgaaact ccataaagaa ctgttccgac  
15541 acttccaact cgtgggattt gccctgccg tccttaaagc tgataaata ccttgtgccg  
15601 ctttccgtgg attcctcccg aagcgtgtat gccttaacc tgatgccat cctgttctc  
15661 tcctgcaaaa aatgagttag gggatttcca tccctcacc agtagcccg aggatggcag  
15721 gctgttttag aagcataaa attttccga gcttctccg cagatggctt aacctcgat  
15781 agatggcacc agtcgcaaa tgacaagcg gggcaatctc ctttggaa taccctgca  
15841 ttttcagcag gacgatttc aaggtacgc cgtccaccgt gactaatact tgatagagat  
15901 tttcgtctc aatcttcc agtaactcc caaccgtacc cacttccgc tgcgctccc  
15961 tgcctgccat gtctcaaga tattccgca cgtcattcgt ccatcggtaa aaccgctgt  
16021 tggaattgaa gtctgcctg tccgccatgc gtatctgctc aatggctgct tcatcaacgc  
16081 cgcactcag cagcagctt tctccgctt cttccagat acgccattc ctgtctccc  
16141 gtccgtgggt gatgccatt ctacttctt ccaatcagaa ttgattgaga gggcagagaa  
16201 aagccccctc atcttccaa aggaaaaaac aagggggctg aacgcctaa attttaatt  
16261 tctattatct tcttagttt tattaggatt ctggcttgc gtttgttac aacgctctg  
16321 gttatgcca acctgcccc gacttcacgc tcggaaagtc cgtcaaaaa gattgcctgt  
16381 atcagctct gttcactatc cgacagcaaa ggcagggcg ctttcagcct gtccaccatg  
16441 accgattga caacggttc tgcaatgtcc accgcttcat cagtataaa gtccagagga  
16501 tttccctgc tgcgtaaa tccgtcaga gatagcagtc tattcttctg atctaattt  
16561 tgcagataac gccaccgtt cttgtcacgg tagaagtctg tgtattgctc cctcacgact  
16621 tcaagcagac agccttgaat ggggataaac agcttctca tataggctg gtcggattc  
16681 ctgcaacggc agaactccgt gtaggataat tccacatagc cgccacttc tctgatata  
16741 accttctgt gtgcatattt caccataaat acctccatc tgaattttg aatgtaaaa  
16801 aatccagatg gagaggcgga gaacgacacc gcatacaga aacagcccta cggcacttc  
16861 caaaaaaat cgacaaaaga aaaaccgca aggctctgtg accttacgg ttatagaaa  
16921 tagtaattct attgatgga gattgtactt ctacttcaa ggtgagaagt accgttgcac  
16981 tggcagaaat tttttaact ggttctctg cgttctctga tatgctatgt atgataaat  
17041 tttgcttctg atgagcagat agataactgc ccgaaaaag gacataaaaa aatccctca  
17101 aatttaaaaa caaattcaga ggtaattta gggataaca aataacca cccgaatat  
17161 gttttttta tttggtagt ttgttctt aaatacga caaaaagagc cgatgattc  
17221 tgaattgtc cacaattca tcggctctg gtcttaagc tctggctctt tgatgacagt  
17281 tatctcaag ttgtcaactt taatcaatct ttctgtctg cttttggac aataaaggg  
17341 ataattctc aaaacagtgt cttcctaatt tttattcgg gttttgctc cacaacagg  
17401 acacaatc cattcgatt tcatcataat tagtctctaa tctttcaa tctattta  
17461 tatgacttt gcaagctgt aagctaact gtggaacata tgccgaacct tatctatag  
17521 gctattcgg cggcggggtt ggcaataaa tttaccaata gctggctggt atcctttta  
17581 ctctgtcaag cagactccct gccatttgt gaaataagtt aatcgttcc tgtattctg  
17641 aatacatc gcagggattt ctctttcag aatgacctc tcattctta tctgagtact  
17701 tacaatatc gcacaatacc ttggagcctc atgatacgc cgtgagagat attcctcgg  
17761 tgataaatt tcaaagtga gatatggctc taatagtct gtcctgctt ttttaaacg  
17821 ctgctcaat acgatagggg aaagcagccg aaagtctcg ggggtacta caggactata  
17881 atacaatca tattcaaac agatttaca gtctgtcact ttcatccat acagccctg

17941 ctcgcagcca taaagaacc cctccataac cgcatTTTgg aacgattgat ttaaataTcc  
18001 aagtGaaact ctgctTtcat actgcactcc gcttccaata gggagcggct ctatggacaa  
18061 cccgacagaa gccagaaag gattTggcgg gacttctatg tggatggat attctgcttT  
18121 tctaagcggT ctttccatat atataacagt aggctcttTt atttctgcct ccacatgata  
18181 ttttctca aggatggcac aatgacttc catctgcaca ttcccaaaa aagaaagat  
18241 aatctcatgc gtttagtat ccacataata ttttaaaga gggTcgccat ctgaaattc  
18301 tgtaagtcc ccaagcaata tttccgctg ttcagattc tttactgcaa tcgttTttg  
18361 gagcataggg agaggattt caataaatt tctctgcggc aacagtattt cgttcccaa  
18421 aatactgttT agtgcaaaa catcattTgg taaaattaca ataccag agcaggctgT  
18481 atcggatgaa tataattcac cgttTgcgg aacacacatc tctgtgattt ttatttctc  
18541 ttttccagat atttaataa catccTcaa atgcaatgTt ccgctatata tacgcacata  
18601 aaaaaacgc cgccttTct ctgaatattc aatcttaaaa acctgcccgc atagttcaga  
18661 ttgacctca ggcgtTgat aataaaattT actggcaatt acttctataa gctgccgaat  
18721 cccagattg ttttagcgc ttccgtgata aacgggaaat aacgttccgT tttggaatc  
18781 cctgttTct tctgtTcca gttctgacat ttaaacggT tccctgaca tatatttctc  
18841 taatagtTca tcgttTcca taattaccgc atccactgt tccatctgT cattgtccgT  
18901 tacatttata tggggatgct gccaacctt tTgcttact ataattccg aagaaagctT  
18961 tgcttTcatt tccgatata ccattggcaa atcaatccc tctTgtcaa tttattgT  
19021 gaaaaaaatt gtcggaatct tcattatctg tagtgatga aacagtatac gggTctgtgC  
19081 ctgatgcca tcctTgcag aaactaataa tactgctccg tctaatacgg ataaagaacg  
19141 gtactctcc gcaaaaaat ccataTggcc tggcgtatct ataattTga ctttTcatc  
19201 ctccactga aaagatgTca ctgctgtctg gatagtgatt ccctTtgac gTccaaatt  
19261 cattgtatct gTcctTgtg tgcctTcatc tacgTccct agttctgcaa ttgcaccact  
19321 ggtatacaat aaactTccg ttaattgtTgt ctttctgCg tcaacgtgag ccagaatgcc  
19381 taagttaatt atttTcatgt gatttTctc ctatcaacac caaaaaagg gcataaaaat  
19441 acccagtgat aaatactct atactgggt aaataactcc aatagccca aacacttat  
19501 atgttTccg gcataaaaa ttacatgata aaagtattct taaactgggt acaaaaaact  
19561 aagcccata ttaaagtga aacgggactg ctactTttg tccactat caaattgaca  
19621 gttattTaa gaatacctg ccgcatattt attaactct tgtataatac tgaatctaat  
19681 tatattctt aaccTttat ttgtcaagct gacaaactaa agcagaaaaa gcggcaggat  
19741 ttcccctgc cactaatcat ctgtTatgc aaaaataatt tcctTtcca caatctcct  
19801 cgcacaagcc ctatgttat tgaggcatcc tTccattct aaggcgtTtt ctgcctTtag  
19861 ctgtTccgtt atgccctgTg cctgtTcat accctctatg agcctTcaa agcgtTcctg  
19921 tgcctgtctg ttgatTcgg caaggtaggc gtttagcctg ccgctTgtaa gaagattggT  
19981 gtatgtaact ttacggTact gtttagata atctaaatgc cgtTgcccc agatgcctat  
20041 tgcctgttct tctcggcgg gtacagTtaa gcacggTatc aaataatccc ctTgcctTc  
20101 gtattTccg cccagTtct caaataatga tttTccatt gTctgtTacc tccacattct  
20161 ttttattTt gaatgtccgC aaaatccgTc ctacatcagt cgtacattta tatatttctc  
20221 ctttTctaat attatattca tacgatagc tagccggTat cgcgatatac gattccttct  
20281 ttcgaatctt tctTgatgtt gTctTctgTc tctctccca atgaatgtgT gcatctTta  
20341 tctgaacata atactTtct aataacatta tttctccat tcttaaaaa tcatttatat  
20401 ttactcctct aaaacatcgt aatatactgt gtttctggc aacttaatat taggtatcca  
20461 aagaggTcta ccaccagc cttactTcc agttacctga tacattgtca atactatctt  
20521 ggaaggaaac tactTcca atctcaatc atcaggagaa agcagtgcac ccgtTcctg

20581 cgcaacatct ctgtttctgc ggacgattag tattccttgt cctgctgggt gttcagataa  
20641 tattgtatca ataactgaaa caaatgcttg taactcaaaa tctggacttg gaataatag  
20701 ccctaatatt tcttttacia ttctaagact aacttgataa tataactctt tctcatcaaa  
20761 tggttcaagt aattttgaaa tttttcgat tgagtcattg tctggataat atggataata  
20821 atttgttcca cctgaaagca tctctacatg atttctatca agcacatttt ttctcgttgg  
20881 attcaaacca tttggataat atatttttat atcctcaatt cctctttcga cctgagcaat  
20941 aatagaatta ttagttgcat ttatatccgc aaacagtta tacagatttt catcaatgta  
21001 caccttcac ataccggat cacgatcata tccaaacata cggctatggt gccacattgt  
21061 gtctcctgt ggttttttac tcttcttgt gtaataaata gttttagac caggaaatgt  
21121 gactcctct cccaatgat ttccaccaat taaaaatta catcctgatt cataataaga  
21181 actctccaca tcatttttc cattcataac gaaaactttg aacatactc cagttaataa  
21241 ttctttaacc ctatcataca aatcttctaa agaacatttt tgagatcttg acggattcat  
21301 atctacatac tctctgctca attcattctt taactctaca tctgagatttt caacacacca  
21361 ttttagttct tttgtatat ccccttcaat cttttatgt acagccactt ttacacttgg  
21421 atgaaataaa caattagata ctttcccacc tgacaaaaga atctgagcag ataccaacag  
21481 atgcctgaca acaactccc tcatgggcat tttcagtttt ccaaaaaatg acacacaatc  
21541 cggctttcca ctgaaggaa agaaaaaatc tctccgaga tacgaatccc cggctgaaa  
21601 ataataatgta aaataaggat gccaccaga cgcaagtgc tgtaaaaaga ttgctgagg  
21661 cgttctgtc acctgcaagt ataaactgct tgatgctcca tttttatgc tgtccaaata  
21721 tttattgatg gaagactggc gattcctgtt gactaatgta ttaataagag ccgcatctgc  
21781 ctatcatca atgatgaaca acggatttcc tttcataaag ccagttgaat taagaatatt  
21841 cgcccacaat ttcatatcc gtacttctt cttcaataca ataattactg gatccattag  
21901 actattttcg gtaaaaagt cgcgatcatt ttctccaaa atacagaatc cttcaagatc  
21961 tgcttttact cggcttagag tctgttgctg aagaacaacg ttatccgtag ttagtaaac  
22021 gaataccgga aatcctaat ctgtagcctt acatagatt ccaaacatct ggcccgtttt  
22081 tccagactga acgtttcca gcaagaggcc aatttcatga ctggaaaaag aaaaatgttt  
22141 tatatgctta tctcaacat catttgcctt ttttcaata gattctgcaa gtttttatt  
22201 tctctatca gttatcttct taagatatgt tttcaaacat cgcgatgact tttctcctat  
22261 tctctttgg atccagtgtt aaatgaaagc atccagacat ccaacggatt tccatctca  
22321 tctaagtctg tctgacctgt cttcttaaat tccagtctgt cacatccata ttctgtagc  
22381 atttctctg taatcattcc cagtcggctc gtatcagttg ccgtattatt taccggtttt  
22441 acaatcccag ctgccgccag ccttctttc agccatcttc ccattatcaa ttcatcgcca  
22501 actgcactaa actgtttatt attatcactt gttgtatgtg ctttaacca ataccatca  
22561 tctgtcacta caaaaaacgg tttattcttc tctggataac cttccatag gtacacatcc  
22621 gcaactactg tcaactgctt ttataccag tctcttgctt ttttctact tctcgggtcc  
22681 gcatagcaga cattaatatt tgactttgta taatgcttc catcatcaa atgacgttcg  
22741 tctttcttag gaactttcag tttcagaaag aatgaaacat acgctttaca cttttcataa  
22801 aactcaactt ttgattttgg tacagatgta accagctcta ttccatttaa tgacgtatta  
22861 actccctca caagaggcat attctttaca agtgaatat tctctgaaca gtttggcatt  
22921 ttcaacttct caatatgttc tgcaatctca gccacttctt gttcatttgt tgtaatagcg  
22981 gacatttcat actgtcttct attgctgct tccaatttaa taactccaag atttgccgat  
23041 ccaataattg ctgaaaatgg tttctcgtct ttgtaaaaac aaaataattt cccatgatat  
23101 ttaaagctct ttacaattcg gatctctcca gattttgatt cctgccactt ttcatatc  
23161 ttaaatgccg tatgatagc cgcttccggc atacctcaa taaagtacat tccaatattt

23221 aaacatactt ttgaaatatt atcttcattc acaatcctat ccaattcaac aagtgatgca  
23281 ttgaaatat atccaactgc aatttcgact ctatctgcta tttttatctg ctattaaag  
23341 cagtctatta ttgttctg attatcctct gttcctaag gcagaatatt tgagtataat  
23401 aatttcatac tgcaccccct ataatacttt agtgttttta ttcaattta ctacaaaaca  
23461 actaataatg ctaggaaaga aataccattc tcaatcacgt gacatcaaat tcaatttct  
23521 ccaaatataca gtatttgaa acaaaaatac ttatactata attgacttat gtcaaagcag  
23581 gggaaacta atacagaat acggttttac caaaagaat tgatctgtgt tcagagaaaa  
23641 aatacatgat ggcaagaatc ctatatggat aaattgaata aagaatata tgagttactg  
23701 agtagtgaag gaaaacctc tgaaaaattc tgagcttag aagagcgaat tcgcaacgat  
23761 aaaaaaata caggtgtaca gtaaaaatg agtcgttcta attgcattcc taacattatt  
23821 tcacttttaa atgaaggagc aatcacgatg aaagatttag aagaatttag cgatgaattg  
23881 aaagaaacaa tacatttcat cacaagataa aattcctatc tattcagaac agagcattca  
23941 caatttatag ctaaagagat tattggcag gcgtcgtagt tcttatgtgt ttcgataat  
24001 aaaattgatg tataatatt atagattga acaaaaataa ggaggagcg aatgaattta  
24061 gaaatatac aaaaatttg ttcagaatca aaaattctc ggacacagca ttgtctgcaa  
24121 cgaatgcagg aaagagatat cagtcgtgct gatgtaaaaa atggaattgc aaccggtgaa  
24181 attatagaag actaccctga cgattatcct aatccaagtt gtctgattt tggatatac  
24241 gtaaatggac gaattttgca tattgttcc ggtgtgata atataaatat atatattata  
24301 acggcatatt accagatac aaagaaatt gaagatgatt taaagactcg aagaaagagg  
24361 tgatggatat gtgtatgtat tgtaaaaata gtacaactgt caatagcaca acaacacagc  
24421 tcgtaaatta taaaattgt attattgtaa ttaaaaatgt tccatgcctt gaatgtgatc  
24481 agtgtggaga aaaatattat acagacgaag ttgctgaacg cttgaattg attgttgata  
24541 tggcgaaaa attaatgcag gaaattgcag ttatcgatta tccacaggtg gcttaataat  
24601 tttggcggaa atatcattt cgatatttc gccacttct tttatatact cttcgacta  
24661 tttattctgt ccaccagtt acataaaatt acaatactct ctaaatttac attaata

//

DEFINITION Integrative and mobilisable element IME\_9

CDS complement(1..62)

/ID=F66\_02590

/color=1

/locus\_tag="F66\_02590"

/note="hypothetical protein"

/product="hypothetical protein"

/protein\_id="gnl|SC|F66\_02590"

/codon\_start=1

CDS 207..995

/color=8

/locus\_tag="F66\_02591"

/note="Heat shock protein META domain-containing protein,  
protein motif:CLUSTERS:PRK10449 protein  
motif:Pfam:PF03724.10"

/product="Heat shock protein META domain-containing  
protein"

/"ID=F66\_02591

/protein\_id="gnl|SC|F66\_02591""  
 /codon\_start=1  
 CDS 1323..3236  
 /color=8  
 /locus\_tag="F66\_02592"  
 /note="Molecular chaperone DnaK, similar to AA  
 sequence:UniProtKB:P0A6Y8 protein motif:CLUSTERS:PRK00290  
 protein motif:Cdd:COG4820 protein motif:TIGRFAMs:TIGR02350  
 protein motif:Pfam:PF00012.14"  
 /product="Molecular chaperone DnaK [chaperone]"  
 /ID=F66\_02592  
 /protein\_id="gnl|SC|F66\_02592""  
 /gene="dnaK"  
 /codon\_start=1  
 CDS 3438..4004  
 /color=9  
 /locus\_tag="F66\_02593"  
 /note="Mobilizable transposon protein TnpA , protein  
 motif:TIGRFAMs:TIGR01764 protein motif:Pfam:PF12728.1"  
 /product="Mobilizable transposon protein TnpA [DDE  
 recombinase]"  
 /ID=F66\_02593  
 /gene="tnpA""  
 /protein\_id="gnl|SC|F66\_02593"  
 /codon\_start=1  
 CDS 4001..5248  
 /color=9  
 /locus\_tag="F66\_02594"  
 /note="Tyrosine recombinase, similar to AA  
 sequence:UniProtKB:P0A0P0 protein motif:CLUSTERS:PRK00236  
 protein motif:Cdd:COG4974 protein motif:TIGRFAMs:TIGR02224  
 protein motif:Pfam:PF00589.16"  
 /product="Tyrosine recombinase [recombinase]"  
 /ID=F66\_02594  
 /protein\_id="gnl|SC|F66\_02594""  
 /codon\_start=1  
 CDS 5572..6213  
 /ID=F66\_02595  
 /color=1  
 /locus\_tag="F66\_02595"  
 /note="hypothetical protein"  
 /product="hypothetical protein"  
 /protein\_id="gnl|SC|F66\_02595"  
 /codon\_start=1

CDS        6347..6715  
           /color=9  
           /locus\_tag="F66\_02596"  
           /note="DNA binding domain excisionase family  
           Helix-turn-helix domain , protein motif:TIGRFAMs:TIGR01764  
           protein motif:Pfam:PF12728.1"  
           /product="DNA binding domain excisionase family  
           Helix-turn-helix domain [excisionase]"  
           /"ID=F66\_02596  
           /protein\_id="gnl|SC|F66\_02596""  
           /codon\_start=1

CDS        6759..7100  
           /color=9  
           /locus\_tag="F66\_02597"  
           /note="DNA binding domain excisionase family  
           Helix-turn-helix domain, protein motif:TIGRFAMs:TIGR01764  
           protein motif:Pfam:PF12728.1"  
           /product="DNA binding domain excisionase family  
           Helix-turn-helix domain [excisionase]"  
           /"ID=F66\_02597  
           /protein\_id="gnl|SC|F66\_02597""  
           /codon\_start=1

CDS        7103..8209  
           /ID=F66\_02598  
           /color=9  
           /locus\_tag="F66\_02598"  
           /note="AAA family ATPase Sms DNA repair protein"  
           /product="AAA family ATPase Sms DNA repair protein"  
           /protein\_id="gnl|SC|F66\_02598"  
           /codon\_start=1

CDS        8410..9309  
           /color=10  
           /locus\_tag="F66\_02599"  
           /note="DNA primase, protein motif:CLUSTERS:PRK05667  
           protein motif:Cdd:COG0358 protein motif:TIGRFAMs:TIGR01391  
           protein motif:Pfam:PF01807.14"  
           /product="DNA primase [replication]"  
           /"ID=F66\_02599  
           /protein\_id="gnl|SC|F66\_02599""  
           /codon\_start=1

CDS        9466..10437  
           /ID=F66\_02600  
           /color=7  
           /locus\_tag="F66\_02600"

/note="MarR family transcriptional regulator winged  
 helix-turn-helix domain-containing protein:Prodigal:2.60"  
 /product="MarR family transcriptional regulator winged  
 helix-turn-helix domain-containing protein  
 [transcriptional regulator]"  
 /protein\_id="gnl|SC|F66\_02600"  
 /codon\_start=1  
 CDS 10425..11204  
 /ID=F66\_02601  
 /color=1  
 /locus\_tag="F66\_02601"  
 /note="hypothetical protein"  
 /product="hypothetical protein"  
 /protein\_id="gnl|SC|F66\_02601"  
 /codon\_start=1  
 CDS 11210..11971  
 /color=8  
 /locus\_tag="F66\_02602"  
 /note="Serine/threonine protein phosphatase, protein  
 motif:Pfam:PF00149.22"  
 /product="Serine/threonine protein phosphatase  
 [phosphatase]"  
 /ID=F66\_02602  
 /protein\_id="gnl|SC|F66\_02602""  
 /codon\_start=1  
 CDS 12193..12645  
 /ID=F66\_02603  
 /color=1  
 /locus\_tag="F66\_02603"  
 /note="hypothetical protein"  
 /product="hypothetical protein"  
 /protein\_id="gnl|SC|F66\_02603"  
 /codon\_start=1  
 CDS 12642..12974  
 /ID=F66\_02604  
 /color=4  
 /locus\_tag="F66\_02604"  
 /note="Conjugal transfer protein TraE"  
 /product="Conjugal transfer protein TraE [mating pair  
 formation]"  
 /gene="traE"  
 /protein\_id="gnl|SC|F66\_02604"  
 /codon\_start=1  
 CDS 13033..13398

/color=4  
 /locus\_tag="F66\_02605"  
 /note="Conjugal transfer protein TraE, protein motif:Cdd:COG3451"  
 /product="Conjugal transfer protein TraE [mating pair formation]"  
 /"ID=F66\_02605  
 /gene="traE""  
 /protein\_id="gnl|SC|F66\_02605"  
 /codon\_start=1  
 CDS 13447..13746  
 /ID=F66\_02606  
 /color=1  
 /locus\_tag="F66\_02606"  
 /note="DUF4133 domain-containing protein"  
 /product="DUF4133 domain-containing protein"  
 /protein\_id="gnl|SC|F66\_02606"  
 /codon\_start=1  
 CDS 13869..16574  
 /color=4  
 /locus\_tag="F66\_02607"  
 /note="Bacteroides conjugation system ATPase TraG, protein motif:CLUSTERS:PRK13721 protein motif:Cdd:COG3451 protein motif:TIGRFAMs:TIGR03783 protein motif:Pfam:PF12846.1"  
 /product="Bacteroides conjugation system ATPase TraG [ATPase mating pair formation]"  
 /"ID=F66\_02607  
 /protein\_id="gnl|SC|F66\_02607""  
 /gene="traG"  
 /codon\_start=1  
 CDS 16795..19335  
 /ID=F66\_02608  
 /color=10  
 /locus\_tag="F66\_02608"  
 /note="Smc-like chromosome partition protein"  
 /product="Smc-like chromosome partition protein"  
 /protein\_id="gnl|SC|F66\_02608"  
 /codon\_start=1  
 CDS 19350..20075  
 /ID=F66\_02609  
 /color=1  
 /locus\_tag="F66\_02609"  
 /note="hypothetical protein"  
 /product="hypothetical protein"



/protein\_id="gnl|SC|F66\_02609"  
 /codon\_start=1  
 CDS 20103..20867  
 /ID=F66\_02610  
 /color=1  
 /locus\_tag="F66\_02610"  
 /note="DUF5045 domain-containing protein"  
 /product="DUF5045 domain-containing protein"  
 /protein\_id="gnl|SC|F66\_02610"  
 /codon\_start=1  
 CDS 20911..21741  
 /color=8  
 /locus\_tag="F66\_02611"  
 /note="Phage antirepressor KilAC domain-containing protein, protein motif:Cdd:COG3645 protein motif:Pfam:PF03374.8"  
 /product="Phage antirepressor KilAC domain-containing protein"  
 /"ID=F66\_02611  
 /protein\_id="gnl|SC|F66\_02611""  
 /codon\_start=1  
 CDS 21757..22158  
 /ID=F66\_02612  
 /color=1  
 /locus\_tag="F66\_02612"  
 /note="hypothetical protein"  
 /product="hypothetical protein"  
 /protein\_id="gnl|SC|F66\_02612"  
 /codon\_start=1  
 CDS 22158..23288  
 /color=4  
 /locus\_tag="F66\_02613"  
 /note="Bacteroides conjugative transposon TraJ protein, protein motif:TIGRFAMs:TIGR03782"  
 /product="Bacteroides conjugative transposon TraJ protein [mating pair formation]"  
 /"ID=F66\_02613  
 /gene="traJ""  
 /protein\_id="gnl|SC|F66\_02613"  
 /codon\_start=1  
 CDS 23354..23755  
 /ID=F66\_02614  
 /color=1  
 /locus\_tag="F66\_02614"

/note="hypothetical protein"  
 /product="hypothetical protein"  
 /protein\_id="gnl|SC|F66\_02614"  
 /codon\_start=1  
 CDS 23759..24373  
 /color=4  
 /locus\_tag="F66\_02615"  
 /note="Bacteroides conjugative transposon TraK protein,  
 protein motif:TIGRFAMs:TIGR03781"  
 /product="Bacteroides conjugative transposon TraK protein  
 [mating pair formation]"  
 /"ID=F66\_02615  
 /gene="traK""  
 /protein\_id="gnl|SC|F66\_02615"  
 /codon\_start=1  
 CDS 24386..24805  
 /ID=F66\_02616  
 /color=1  
 /locus\_tag="F66\_02616"  
 /note="hypothetical protein"  
 /product="hypothetical protein"  
 /protein\_id="gnl|SC|F66\_02616"  
 /codon\_start=1  
 CDS 24789..25931  
 /color=4  
 /locus\_tag="F66\_02617"  
 /note="Bacteroides conjugative transposon TraM protein,  
 protein motif:TIGRFAMs:TIGR03779 protein  
 motif:Pfam:PF12508.2"  
 /product="Bacteroides conjugative transposon TraM protein  
 [relaxosome]"  
 /"ID=F66\_02617  
 /gene="traM""  
 /protein\_id="gnl|SC|F66\_02617"  
 /codon\_start=1  
 CDS 26001..26846  
 /color=4  
 /locus\_tag="F66\_02618"  
 /note="Bacteroides conjugative transposon TraN protein,  
 protein motif:TIGRFAMs:TIGR03780"  
 /product="Bacteroides conjugative transposon TraN protein  
 [mating pair formation]"  
 /"ID=F66\_02618  
 /gene="traN""

/protein\_id="gnl|SC|F66\_02618"  
 /codon\_start=1  
 CDS 26846..27391  
 /ID=F66\_02619  
 /color=1  
 /locus\_tag="F66\_02619"  
 /note="hypothetical protein"  
 /product="hypothetical protein"  
 /protein\_id="gnl|SC|F66\_02619"  
 /codon\_start=1  
 CDS 27400..28053  
 /ID=F66\_02620  
 /color=1  
 /locus\_tag="F66\_02620"  
 /note="DUF1566 domain-containing protein"  
 /product="DUF1566 domain-containing protein"  
 /protein\_id="gnl|SC|F66\_02620"  
 /codon\_start=1  
 CDS 28120..29028  
 /ID=F66\_02621  
 /color=8  
 /locus\_tag="F66\_02621"  
 /note="Fimbrillin family protein"  
 /product="Fimbrillin family protein"  
 /protein\_id="gnl|SC|F66\_02621"  
 /codon\_start=1  
 CDS 29109..31298  
 /color=4  
 /locus\_tag="F66\_02622"  
 /note="TraM recognition site of TraD and TraG Type IV  
 secretion-system VirD4 components , protein  
 motif:Cdd:COG3505 protein motif: Pfam:PF10412.3"  
 /product="TraM recognition site of TraD and TraG Type IV  
 secretion-system VirD4 components [coupling protein]"  
 /ID=F66\_02622  
 /protein\_id="gnl|SC|F66\_02622""  
 /codon\_start=1  
 CDS 31352..31849  
 /ID=F66\_02623  
 /color=8  
 /locus\_tag="F66\_02623"  
 /note="lysozyme Glycoside hydrolase family protein"  
 /product="lysozyme Glycoside hydrolase family protein  
 [hydrolase]"

/protein\_id="gnl|SC|F66\_02623"  
 /codon\_start=1  
 CDS 31938..33146  
 /color=9  
 /locus\_tag="F66\_02624"  
 /note="Tyrosine recombinase, protein  
 motif:CLUSTERS:PRK00283 protein motif:Cdd:COG4974 protein  
 motif:TIGRFAMs:TIGR02225 protein motif:Pfam:PF00589.16"  
 /product="Tyrosine recombinase [recombinase]"  
 /"ID=F66\_02624"  
 /protein\_id="gnl|SC|F66\_02624""  
 /codon\_start=1  
 CDS complement(33396..34607)  
 /color=9  
 /locus\_tag="F66\_02625"  
 /note="IS1380-like element IS612 family transposase,  
 protein motif:Pfam:PF01609.15"  
 /product="IS1380-like element IS612 family transposase  
 [DDE recombinase]"  
 /"ID=F66\_02625"  
 /gene="tnpA""  
 /protein\_id="gnl|SC|F66\_02625"  
 /codon\_start=1  
 CDS 34872..36089  
 /color=2  
 /locus\_tag="F66\_02626"  
 /note="macrolide efflux MFS transporter Mef A 29 Major  
 Facilitator Superfamily, protein motif:CLUSTERS:PRK10489  
 protein motif:TIGRFAMs:TIGR00900 protein  
 motif:Pfam:PF07690.10"  
 /product="macrolide efflux MFS transporter Mef%28A%29  
 Major Facilitator Superfamily [antibiotic resistance]"  
 /"ID=F66\_02626"  
 /gene="mefA""  
 /protein\_id="gnl|SC|F66\_02626"  
 /codon\_start=1  
 CDS 36109..36963  
 /color=8  
 /locus\_tag="F66\_02627"  
 /note="Nucleotidyltransferase domain-containing protein,  
 protein motif:Pfam:PF01909.17"  
 /product="Nucleotidyltransferase domain-containing protein  
 [nucleotidyltransferase]"  
 /"ID=F66\_02627"

/protein\_id="gnl|SC|F66\_02627""  
 /codon\_start=1  
 CDS 36960..37694  
 /color=8  
 /locus\_tag="F66\_02628"  
 /eC\_number=2.1.1.-  
 /note="Class I SAM-dependent methyltransferase ycgJ ,  
 similar to AA sequence:UniProtKB:O31474 protein  
 motif:CLUSTERS:PRK08317 protein motif:Cdd:COG4976 protein  
 motif:TIGRFAMs:TIGR02072 protein motif:Pfam:PF08241.6"  
 /product="Class I SAM-dependent methyltransferase ycgJ  
 [methyltransferase]"  
 /"ID=F66\_02628  
 /protein\_id="gnl|SC|F66\_02628""  
 /gene="ycgJ"  
 /codon\_start=1  
 CDS 37727..38635  
 /color=2  
 /locus\_tag="F66\_02629"  
 /eC\_number=2.7.7.-  
 /note="Aminoglycoside 6-adenylyltransferase Streptomycin  
 adenylyltransferase, similar to AA  
 sequence:UniProtKB:P17585 protein motif:Pfam:PF04439.6"  
 /product="Aminoglycoside 6-adenylyltransferase  
 Streptomycin adenylyltransferase [antibiotic resistance]"  
 /"ID=F66\_02629  
 /protein\_id="gnl|SC|F66\_02629""  
 /gene="aadK"  
 /codon\_start=1  
 CDS 38644..39174  
 /color=2  
 /locus\_tag="F66\_02630"  
 /note="Streptothricin N-acetyltransferase Sat4  
 Acetyltransferase GNAT family , protein  
 motif:CLUSTERS:PRK10975 protein motif:TIGRFAMs:TIGR01575  
 protein motif:Pfam:PF00583.18"  
 /product="Streptothricin N-acetyltransferase Sat4  
 Acetyltransferase %28GNAT%29 family [antibiotic  
 resistance]"  
 /"ID=F66\_02630  
 /gene="sat4""  
 /protein\_id="gnl|SC|F66\_02630"  
 /codon\_start=1  
 CDS 39335..40342

/color=9  
 /locus\_tag="F66\_02631"  
 /note="IS5 family transposase, protein motif: Pfam:PF01609.15"  
 /product="IS5 family transposase [DDE recombinase]"  
 /"ID=F66\_02631  
 /protein\_id="gnl|SC|F66\_02631""  
 /codon\_start=1  
 CDS 40535..41320  
 /color=2  
 /locus\_tag="F66\_02632"  
 /eC\_number=2.7.1.95  
 /note="Aminoglycoside 3'-phosphotransferase, similar to AA sequence: UniProtKB:P0A3Y5 protein motif: Cdd:COG3231 protein motif: Pfam:PF01636.17"  
 /product="Aminoglycoside 3'-phosphotransferase [antibiotic resistance]"  
 /"ID=F66\_02632  
 /protein\_id="gnl|SC|F66\_02632""  
 /gene="aphA"  
 /codon\_start=1  
 CDS 41596..42168  
 /color=7  
 /locus\_tag="F66\_02633"  
 /note="DeoR-like helix-turn-helix domain protein, protein motif: CLUSTERS:PRK11886 protein motif: Pfam:PF08279.6"  
 /product="DeoR-like helix-turn-helix domain protein [transcriptional regulator]"  
 /"ID=F66\_02633  
 /protein\_id="gnl|SC|F66\_02633""  
 /codon\_start=1  
 CDS 42273..42548  
 /ID=F66\_02634  
 /color=1  
 /locus\_tag="F66\_02634"  
 /note="WYL domain-containing protein"  
 /product="WYL domain-containing protein"  
 /protein\_id="gnl|SC|F66\_02634"  
 /codon\_start=1  
 CDS 42677..43318  
 /color=8  
 /locus\_tag="F66\_02635"  
 /note="5-amino-6-%285-phosphoribosylamino%29uracil reductase, protein motif: CLUSTERS:PRK05625 protein

motif:Cdd:COG0117 protein motif:TIGRFAMs:TIGR00227 protein  
 motif:Pfam:PF01872.11"  
 /product="5-amino-6-%285-phosphoribosylamino%29uracil  
 reductase RibD family protein [reductase]"  
 /"ID=F66\_02635  
 /gene="ribD""  
 /protein\_id="gnl|SC|F66\_02635"  
 /codon\_start=1  
 CDS 44164..45477  
 /color=9  
 /locus\_tag="F66\_02636"  
 /note="IS21 family transposase, protein motif:Cdd:COG4584  
 protein motif:Pfam:PF00665.20"  
 /product="IS21 family transposase [DDE transposase]"  
 /"ID=F66\_02636  
 /protein\_id="gnl|SC|F66\_02636""  
 /codon\_start=1  
 CDS 45440..45802  
 /color=10  
 /locus\_tag="F66\_02637"  
 /note="DNA replication protein DnaC, protein  
 motif:CLUSTERS:PRK09183 protein motif:Cdd:COG1484 protein  
 motif:Pfam:PF01695.11"  
 /product="DNA replication protein DnaC [replication]"  
 /"ID=F66\_02637  
 /protein\_id="gnl|SC|F66\_02637""  
 /codon\_start=1  
 CDS 45854..46189  
 /color=10  
 /locus\_tag="F66\_02638"  
 /note="DNA replication protein DnaC , protein  
 motif:CLUSTERS:PRK09183 protein motif:Cdd:COG1484 protein  
 motif:Pfam:PF01695.11"  
 /product="DNA replication protein DnaC [replication]"  
 /"ID=F66\_02638  
 /protein\_id="gnl|SC|F66\_02638""  
 /codon\_start=1  
 CDS 46259..46552  
 /color=9  
 /locus\_tag="F66\_02639"  
 /note="IS3/IS911 family transposase, protein  
 motif:Pfam:PF01527.14"  
 /product="IS3/IS911 family transposase [DDE recombinase]"  
 /"ID=F66\_02639

/protein\_id="gnl|SC|F66\_02639""  
 /codon\_start=1  
 CDS 46813..47427  
 /color=9  
 /locus\_tag="F66\_02640"  
 /note="IS3 family transposase, protein  
 motif: Pfam:PF00665.20"  
 /product="IS3 family transposase [DDE recombinase]"  
 /"ID=F66\_02640  
 /protein\_id="gnl|SC|F66\_02640""

/codon\_start=1  
 CDS 47564..48235  
 /ID=F66\_02641  
 /color=8  
 /locus\_tag="F66\_02641"  
 /note="Nucleotidyltransferase domain-containing protein"  
 /product="Nucleotidyltransferase domain-containing protein  
 [nucleotidyltransferase]"  
 /protein\_id="gnl|SC|F66\_02641"

/codon\_start=1  
 CDS 48232..48972  
 /color=8  
 /locus\_tag="F66\_02642"  
 /eC\_number=2.1.1.-  
 /note="Class I SAM-dependent methyltransferase ycgJ,  
 similar to AA sequence: UniProtKB:O31474 protein  
 motif: CLUSTERS:PRK08317 protein motif: Cdd:COG4106 protein  
 motif: TIGRFAMs:TIGR02072 protein motif: Pfam:PF08241.6"  
 /product="Class I SAM-dependent methyltransferase ycgJ  
 [methyltransferase]"  
 /"ID=F66\_02642  
 /protein\_id="gnl|SC|F66\_02642""

/gene="ycgJ"  
 /codon\_start=1  
 CDS 49010..49481  
 /color=8  
 /locus\_tag="F66\_02643"  
 /note="HD domain-containing protein phosphohydrolase  
 [hydrolase]"  
 /product="HD domain-containing protein phosphohydrolase  
 [hydrolase]"  
 /"ID=F66\_02643  
 /protein\_id="gnl|SC|F66, protein motif: Cdd:COG1418 protein  
 motif: Pfam:PF01966.16"



/protein\_id="gnl|SC|F66\_02643"''''

/codon\_start=1

BASE COUNT 15339 a 10040 c 11861 g 12241 t

ORIGIN

1 tgagctgtga taggaggcgt aacacagcag aatagaatca aagacaggac aattattctc  
61 atatttgttt actttaggtg aactatgtaa attgttcggt tgggtatata ttattggcaa  
121 atgtatatat tttatgttgc attggatatt atttccaat cttttgatat ctttgcccc  
181 gattttaact taaacgttat aacaatatga agaaagtatt tgtttcaatt tgcattgctg  
241 gtgcagcact tgcaatgtct tcgtgccgtt cggttgagaa ggcaattccc ctgtcatcta  
301 tcaatggatga atggaatata atagaagtca atggctcgaa aatcactccg ggcgaaaagta  
361 aatcccttcc ttttatcgtc tttgatacag caaccggctg tgtgtccggc aatagcggct  
421 gtaatcggat gatgggtagc ttcgatgtaa atgcgaagcc gggaaagtctt gaacttacag  
481 gaatggctag taccggatg atgtgtccgg atatgactac tgaataaat gtattgaatg  
541 cttttgcgca agtaaaagga tataagaagg caggtaaaga caaatgtat ctttgcaatt  
601 cgtccaaccg cccggtgtc gttctacaaa agaaggaggc tgatgtgaaa ctttcggttt  
661 tgaatggaga atggaaaatt aaagaagtga atggtgaggc aattccttcc ggaatggaaa  
721 aacaacctt cattgctttt gatgtgaaga aaaagacaat tcatggcaat gccggatgta  
781 atctgattaa tggcggtttt gaaaccagta ccagtaatgc caaatctatt tcttcccgg  
841 gagtagcgag cacaatgatg gcttgtccgg acatggaaac agaaggtaag gtgctgaaag  
901 ctatcaatga ggtgaagtca ttcgatgtgt tgtccgggtg tggcattggc ttgtatgatg  
961 caaatggcgc atgggtcact gtgctggaaa agtaataaat agattatcta tataatagga  
1021 tatgcctgtg tcgcacatga tgacacaggc atatttttt tctttctac gaaccagagc  
1081 cgtctgcatt tgtttaaaga aacagttgct gactggcttt gaatatgact atgtcagcag  
1141 tgtctattta ttaaaactgt cttttggca gatattatgt catgcattcg tataatttcc  
1201 ttttggcaca cggtttgctt tttagtaagc gtccgttcgc gacgaggctc gctgataaga  
1261 gccggagaaa caaccggaca aaaagaaatc atagaataaa taataaataa aaaataacga  
1321 tcatgggaaa aattattggt attgacttag gaactacaaa ctcttggtt gccgtatttg  
1381 aaggtaacga acctgtagta attgcaaca gtgaaggtaa acgtacgact ctttctgttg  
1441 tcgcttctgt agatggcggg gaacgtaagg taggatcc tgcaaacgt caggctatta  
1501 cgaatcctac acgtacaatc ttctctatca aacgtttcat gggtgaaact tgggatcagg  
1561 tgcaaaaaga ggtgactcgt gttcctata aagtagtgaa aggtgacaat aacactccgc  
1621 gtgttgacat tgacggacgt ctgtacactc cgcaggaaat ctctgctatg attcttcaga  
1681 agatgaagaa gactgctgaa gactatcttg gacaggaagt gacagaagca gttatcaccg  
1741 ttcctgcata tttctccgac tctcaacgac aggctactaa agaagccgga cagattgccg  
1801 gtctggaagt aaaacgtatt gtaaacgaac cgacagccgc tgctcttgct tacggtctgg  
1861 ataaggctca caaagatatg aagattgctg tattcgacct tgggtggtgg acattcgata  
1921 tttctatcct tgaatttggg ggtggtgtgt ttgaagtact ttctacaaat ggtgatactc  
1981 acttgggtgg tgatgactc gaccaggtaa tcatcaactg gttggtacag gaattcaaga  
2041 atgacgaagg tgctgacctg actcaggatc cgatggcttt gcaacgtctg aaagaagctg  
2101 cagaaaaagc taagattgag ctttcttct ctacaagtac agaaatcaac ttgccgtata  
2161 tcatgccggg aggtggtgtg cctaagcact tgggtgaagac tttgactcgt gcaaaattcg  
2221 aatctctggc tcacgaattg attcaggctt gtcttgaacc atgtaagaaa gcaatgagcg  
2281 atgcaggttt gaacaatgct gatattgatg aagtaatcct tgttgggtgt tcttcccgta  
2341 ttccggctgt tcagaattg gtagaagatt tcttcggcaa gactccttct aaaggtgtga

2401 atccgatga agtgtagct attggtgctg ctgtacaggg tgctgtttg acagatgaaa  
2461 tcaaaggtgt agtattgttg gatgttactc cgtgtcaat gggatcga aactgggtg  
2521 gtgtgatgac taagtgtac gacgctaaca ctaccatccc ggctcgaag agtgaaacat  
2581 tcttactgc tgccgataac cagacggaag ttactatcca cgtgttacag ggagaacgct  
2641 cgatggctgc acagaataaa tcaatcggtc agttcaactt gacaggtatt gctccggctc  
2701 gtcgtggtgt tcctcaaatt gaggttacct ttgatatcga tgccaacggt atttgaaag  
2761 tatctgcaaa agataaggct accggtaaag aacaggctat ccgtattgaa gcatccagcg  
2821 gtttgagcaa ggaagaaatc gaaaagatga aggctgaagc tgaagctaat gctgaagcag  
2881 ataagaaaga acgtgaaaag atcgacaagc tgaaccaggc tgacagcgta atcttctca  
2941 ctgaaaatca gttgaaagaa ttagggtgata agttgcctgc tgacaagaaa gctccgattg  
3001 aagctgcttt gcagaaattg aaagatgctc acaaggcaca ggatttggct gctattgata  
3061 ctgctatggc agaaatcaat actgctttcc aggctgcaag tgctgaaatg tatgcacaga  
3121 gcggtgcaag aggtggagca caggctggct ctgatatgaa tgggtggtgct ggccagcaag  
3181 ataacagcaa gcacggagat aacgttcagg atgctgactt cgaggaagtg aaataagcac  
3241 atagagaaat aagaatacaa tatcaaatgg aaagcgtgta gctcaatgag ttacacgctt  
3301 ttctgtttt tggccgtaca caataatatt gctatctttg cgttattatt ataaacatct  
3361 gtaccttatt tgtacctga agaaaaagta gatatgatga gaagaataga tattaagaac  
3421 taaaaaatga atgaattatg gcagtagcaa agtataagat agtacggaaa tgcctgtgt  
3481 gcggagaaga gttcttcga aggactttgg agtctctgta ttgttaccac aaatgctcca  
3541 aggtggcgtg gaagcgtgta catgatgaag aaaaacgcca acttgaactg gacaagattg  
3601 taagcaatat gcccaagtct aaagagtata tcagcataac ggaagcgtat gctatgtttg  
3661 gtgcaagccg ctcaaccatt tataggctca tctacatgaa aaagatttcc ttattgagc  
3721 cagagaaagg aatacactt gtatgcaaag gagaactaat gaatctgttt ccgtaagac  
3781 agtctccgct tgacaccaag ccaaggaaac cagttaccat gtaccgcatg gaaccagagg  
3841 attgctatac aataggtgag atttcaaga aatttcatct ggatgacagc accgtgatg  
3901 ctcatatacg aaaatactca ataccgacc ggcaaatcgg taattatgtg tatgctcaca  
3961 agaatcaat agacaaactt tataaagata taaaaccatt atgaaaagat tagattatac  
4021 taaagtctcc gtcaaattaa agaaaagtga gtggagagat gagggttca tctatcttga  
4081 agcttatctt gtttatgaga cgggaaatga caaaccaaaa cgagtgcgtg aatatctcag  
4141 gaggcttatt actacccta tatgggataa acgacgaagc gagcagccg ttgctgtag  
4201 aataaagtac aagccaagc gagatgacaa tggcgttatt cagtgtaaat ccaagcaaga  
4261 tatggaaact tgctttatg cggatggcgt tcgagtcctg cgtcaaaaag agtacgaaa  
4321 catggctctc ttactgacc agcaaatgga aatggcagaa caaagcgaac gctcaaaatg  
4381 caatgttctg gagtatattg agaagttaat caaagaaaga gaggaaactg cgtcagaatc  
4441 gatagttgtc aactggcgca gattgcacac actgttgcata atgtttgcca agtgtgacta  
4501 catacagttc tcgagattg acatgaagta tattgaggca ttccgttct tcttgataaa  
4561 ggcaccgag ggtggttcta agaaaggaac tatttcaagg aatacggcat cgacgtactt  
4621 ctctatcttc aaggcggcac tcaaacaagc tttcgtggat ggctatctga attgtgatat  
4681 tgctccaag gctaaaaata tcatgtttca gaggctcga agagagtatc tgcactgga  
4741 agaactta atattggcaa agactccgtg tgatgatata ctaaaacggg cagccttgtt  
4801 ctctgactg acaggaatgc gacatagcga tattcaaaag cttaaattgt cagaggttga  
4861 agaatacaat ggtgggtacc gtctcaattt cactcagcag aagactaagg gcgttgaata  
4921 catgcctata tcgccacagg catacaagct ttgcggtgag cgcaagaaag acggagaact  
4981 gttggtgttt gccggactgc ctgacccttc atggatatct aggccttgg aacggtgggt

5041 aaaagcatca gggattacca agcacatcac ctttcattgc ttccgccaca cctatgcaac  
5101 gttacaattg gctaacggta cagacatata taccgtaagc aaaatgtag ggcataccaa  
5161 tgtaaaaacc acgcaaatct acgcaaaagt aattgacaag aagaaagatg aagctacaga  
5221 agcttttaag ttggacatag atgaatagtg attatcattt gtaagcactt agtatagaag  
5281 accacttgta tcaataagtc ctttattgta cagggtggtt ttagtgcctt tcattttcaa  
5341 cattctatgt aatgatgcta ttgtttggc actttaacct ttcgtggaaa ccaaacattt  
5401 ataacaataa acagataaaa atgaaaaaag acagcctttt ttggcttctc tcttttgaa  
5461 gagagcaagc gtgtccacaa acatgtggag tgtacagaag acttctacag agaactgtat  
5521 gagtgtttg agatcgcaag aagtgggtat cttcaagctg aaaagaatca tatgaagaca  
5581 gagtacttca tagaactatt tgagcgcagt caccaatata ttgactgtga ttgtgcacgt  
5641 tgtaagaact cgcgacagat ggcaattggc attattggta ctttgtttag agactctaag  
5701 tgtgtgtaa taatcaagaa aaaagaagat tattccaagc aggaacttat tgagtgttt  
5761 cttcaacatg tgggtactgg tctgccaatc cttaccgaa agaaatcgtc catcctcact  
5821 ttgggatgcc aattgtcaga cagacagatg gatttgttgg tagaacttgt ccaagtcac  
5881 gacatatatt atttgcccga caacagtgat gtgcgtagcg agttgtgtcg cctattcaag  
5941 tgcgacttgg acgcatctat ccgtgtaaag aatgtacgta atgtagccgt actgtttgac  
6001 gctatggctc aataccattt gataaacaat aattggcaat atgtcatggg agaaggtcgc  
6061 ttcttaacca gtatcaaaaa ggatggaaca gagaaattca taacttcaag ttgtcttcc  
6121 tcttctctt caagataag aagaaacgtt tccatgacag caagtcaata tgccatctgc  
6181 aatccatcg aacagatatt aagagaggaa taaatcaca taattctgct aatgaaagt  
6241 aaaaacgtga tagtttgggt gatactgcct tactatcacg ttacttttc tatttagtga  
6301 cagtctccc ataacttgc atcaaaaatc ataaaaata attagcatgg aagaaaatg  
6361 tataagattt gaagatattc ccaacgctat aacgggggta ctgaaaaagc tgtcatcatt  
6421 agaagacaag attgatggta tatatgaact tgttcaatca gaaaaagaag aaacatgggt  
6481 tacggttct gaattatgtg cttatctccc aacacatccg gtagagcata ccatatattg  
6541 ctggacaagc aatcgggaaa tacctttca caagagaggc aaacgcatca tgttctcaa  
6601 atctgagata gatgaatggc ttcaaggaac caagggcaaa tcgaagaacg agattcaaag  
6661 agaagcagag gaatatgtac tatctacaca aagaaagaat agacggctaa tataaccgtg  
6721 ctactgtctg taaacaattt aattaaggta cgtgacacat gaatgaaaga cattttagac  
6781 tctatgagcg aattgtcgca atagaagaca gtttggaggc tttgggacct attgacaaac  
6841 taatagagcg aatcagggaa ttggagaaga tggcaagca gacaaaacc gtcttggggt  
6901 ttgacgaagc atgtaagtat attggtgtt ctgaaagcct gctatacaaa cttacagccg  
6961 caaagaagt tccacactat aagccaaggg gaaaaatgct gtattttaat agagaagaaa  
7021 tcgacaagtg gctgctcaa aacaacaag aggtcattgg aatggtaacg aaaatagaaa  
7081 ttgataatcc gaaagaatga aatggaaga aaatacaaaa catgtacagc ctaactcaaa  
7141 agaggaagga gtacagcgtc tcaatcgcatt attgagcga tcgttgataa aggcaacaga  
7201 tacttataaa acacctctc agattatag ggttgataat tccagcatag ccacattggg  
7261 caacttcagt gcttctactg gtaaggcaaa ggcgaaaaag accttcaacg tgtctgcctt  
7321 ggtagccgct tccctcgca acggcaagg actgaactat cgcgccagtc tgccagaggg  
7381 gaaacgcaag atactgtatg tagatacggg gcagagccgc tatcactgcc ataattgtct  
7441 ggagcgcac ctgaagctcg ctggtctacc tacaagcacc gacaacgaga accttgactt  
7501 tatctgtctg agagagtaca cgccctccgt caggatagag gtcatagact atgcgcttgc  
7561 ccaagaccaa agctatggac tggatcatcat cgacggaatc agagacctgc ttctcgacat  
7621 caacaatcgc ggagaatcgc tcgaggtcat caacaagatg atggaatggt catcaaagta

7681 tgacctgcac atccattgcg tattgcatca gaacaagggc gacaataacg tgcgcgggca  
7741 taticggtacg gagatgaaca acaaggcaga gacggtgctt gtcacacca agagcaccac  
7801 caatcccacg atcagcgagg tgaaggcgt gacatccgt gagaaggagt tcaagccgtt  
7861 tgcctttaca gtcaatgagg aagggttgc agagattgtc gagcacacgc cggagaagga  
7921 agaaggtgac aagcaaccgt caaggtttac ttaccaagac ttgacatccg aacagcataa  
7981 cgaggcgctg acggctgcat tcaaggagaa acctatcaaa ggattcgatc gcatggtgga  
8041 ggaattaacg caagcctatg cagacattgg cttaagcgt ggcagaagcg tcatcatcaa  
8101 aatgctgaaa tacctgatta acgagcaaaa gctcatagtg aagcgggata atcattacta  
8161 tttcggatat acacctgccg agattgacct gttccatgaa gaggaataaa aacagttcag  
8221 aaaccagttt agtttacgtc cgtacctata tataagaaat aaggccaaag taaaccgaaa  
8281 tcggaggctg aattgggaag cggaaaagta gtttagcaaa tggtttagtt tacgggtgtg  
8341 cctatatagg agaaaaggta aagtaaactg tttccatgga caaagtaaaa ccgaacaaat  
8401 gaaagtacaa tgaatattga acaatcgaag aaactgagca ttatagactt cttagacaag  
8461 gagaatgtaa cgctgaaaaa gaagaagggc aatgcctact ggtatctgtc accttcagg  
8521 gacgagaaga ccgcatcgtt caaggtcagc aagaaggaga acctgtggta cgactacgcc  
8581 attaaggagg gcggtgacct tgtggagctg gtaaagcgtg tgtataacaa acaatccgtt  
8641 tccgatgcc tgcctacct tgcgtccaag agtattgcca ctgtggataa ggcaatcgag  
8701 accgctatcg cagccaagga atacacgaca accaagatga acgatgtgaa gctgctccca  
8761 ctgagcaacc attctctgct gtcctatttc agtagccgac ggatagacat caccattggc  
8821 aggatgtatt gcaggagat aactacaag gttgagcaaa aacattacta tggcattgca  
8881 tttggcaatc tgagtgaagg acatgaggtg cgcaatccct atttcaaggg ctgcatcggg  
8941 cataaggaca tcacctgct tccccatagc ttcaacgagt ggcaaacgg ttgtctggc  
9001 tttgagggtc tcatggactt cttgtctat atgacctcg ttaaacagca agaccgatgg  
9061 tttgtcgttg aaagcccttg cgactatatg atactgaact cagtcgcaa cctcaaacag  
9121 gcattgcatt acctgaccg ttacaccac atccattgct tctcagcaa cgaccaggca  
9181 ggacgcaaga cgttgagag catcagcaat gtattcgagt acagggtgac ggacgagtc  
9241 ttcagatatg ccgactacaa ggatgtcaac gactatctga tgaggaagaa acgaacggca  
9301 tctgaatgac attataaaga cgaaaacacc atcatttgat gcaaaaatgg ctcaaatgca  
9361 ttgaaattac atatcaaatc tgcactttt cgcccaaca tgcttgattc tcaattatta  
9421 tccttattt tgcactgtt taatacatta ttaaatgta gcagaatgga attgaaaaa  
9481 gaaataagga tattgggcag acgcttgag gtggaacctc gtgccaagga aagcctgaaa  
9541 ggcatcacgg ttggcgagaa actctcatal cgtttctatg atggcacata ccaaggcacg  
9601 cccctgctgt tcgttgagcc caagaagggc aatccctctc cacggacttg cgccatcacg  
9661 ggcaagcggg tgaccgaagc cctgggactg cctgcggtgt ttatccttc gcccgacc  
9721 acctacgagc gacacagact ggcagacaaa ggagtcttct ttgtcatgtc cgaggaatat  
9781 gccatctgc caggcatcat agcattggag aagacaagca acaggaagat tgccgaagta  
9841 ttgaccctg ttggcgaata catactactc tatcacctac aggtgggcag tattgaagga  
9901 atgtcgcaa gggatattgc accgttctt ccatattctt acgaaagcgt cacgttgggt  
9961 gtcacctgct ttgaagatgt aggactgtgt caaaagattc agaacggaca gcgcagcaag  
10021 gtggtacact tcgagttgaa gggcaaggaa ctgtgggaca aggctcagaa cgtcttgctg  
10081 tcacctgtgg agaaccgat ctttgcgat gacatagct tggatgcgga ataccgcta  
10141 tgcggcatca atgacctggc acattattcc atgcttaatc gtgaccggga agagatgata  
10201 atgatgacaa gcaaggaata tcgtgccgtc aagtcggctg atgtcatgga gaatccaac  
10261 atctatgacg gcaactatat catagaggta tggaaatacc ctgttgcag caaatgggc

10321 gacaaaagcc agtgggttga tcgctttcc cttgtccttt cgttgagaga tgatgatgat  
10381 ccgagagtag aaaaagaagt agaacgaata atcagtgaac agaaatggaa ggattagtca  
10441 agttccgtga agcatttgcg gaatactcag aaaactatgt ggtgataggc ggagcagcct  
10501 gtgacatcac catgaccaat accgtggtgc gtccacgcgc cacacacgac atcgacatga  
10561 tagtcatcgt agagaacatg accgaggctt tcgccaatcg cttctggcag tttgtgcggg  
10621 aggctggcta tcgacctgaa aagaggaaac aggaggctgg tgagccacca aggtatgaaa  
10681 tgtatcgttt cttgatggt aaagacggct atcccagat gatagaactg ctgtcacgcc  
10741 accccgacgt gcttggagag ccaaagggat ttgtcataga acctatccc accgatgaa  
10801 atgtgtcgag tcttagtgcc atcatcatgg acgatgatta ctatcacttt actatcgac  
10861 acagccaact gactgatggc atacgccatg ccaattccgc tgccttgata gactgaagg  
10921 caagagccta cctaaatctc atggcagaca agcgggacgg caagcatgtg aacaccaaag  
10981 acatcaagaa gcaccgttcg gacatcctga aaaatgtggt cataatgact gaggacaaca  
11041 ttgaggctcc tgcttcaata gtggcatgta taaggagatt tgcgcctcc atcagagccg  
11101 actggtcaac tctcgagaa ccattgtcaa agtcactcgg tcaagacgag gcatttgtga  
11161 ccggactggt agatcaactg gatgaattgt ttatagaagc atgaccaata tgaagataca  
11221 atacgcatcc gacctgacg tggagttgc cgacaattgg cggatctga aagcccccc  
11281 cttggagggtg acgggacgaca tactgctgct tgccggcgac atcggctatc tcggcgatga  
11341 caactactcc aagcatcctt tttgggactg ggcatcggag aactacaagg aggtgcattg  
11401 ctgcatgggc aacctgagt tctacaaata ttatgatgtg gcgacactgc ccgacggcta  
11461 tctcttgag gtacgtcca atgtattcag ccactacaac ggtattgcga ggattggcga  
11521 caccgacatc atcctctcca cccttggtc gaggattcct ttggaggacg cttacttca  
11581 cgagcaagtg ataagcgact tccgccgtat attatataaa ggtgagctga tgacctatg  
11641 ccaattcaat gctgagcatg aacgttgct cacctttatc aaggatgcag tggcatattc  
11701 gcaagcagcc cataagattg ttgtaccca tcatgtacca tcgttccgta tgcctcacc  
11761 aaagttcaa ggcagcaagg caaacgtggc gttcacgta gagttggagg actatatcac  
11821 cgatagcggc atagactatt ggatatacgg acattcgac accaacatcg atgccaggat  
11881 aggcaacacc caatgcttgt ccaaccagtt gggctatggt ttcttaacg aacatcagga  
11941 cttctccat ggcaagtacc tgaccatata gccatccaca ttttttcat ccacctctt  
12001 tacaagctct tcctatcgg aagggtttt tttgtcctt tcgagttga ttttgagta  
12061 tgattgcgag tgtaatcaaa attagagttg agattggct ccgcgaaag tcatttcggt  
12121 ttaagattga agaaaaggta gttccttgc atcggcaata agccaaacca tagtaaaat  
12181 aaactgaaa atatgaagtc atttgtaata ttcgccattg tcgtgacct aatctatgtc  
12241 atctactata cggcatcat cgtgcaggat ctgtacggaa agcccaagga cgagaagtca  
12301 cagggcgagt cgtttgatgt cagtacatg accgacgagg aagagtcgat agcggtcagc  
12361 gagagcgagc gtggtttcag ctaggcgac aaccaatag agacagccta cgaggagaag  
12421 cagcttcag agcctacaga ggaggcagcc gccactgcgg aagagagcaa gcctcatgtg  
12481 cttgaaaaga tacaagcgc aatcgagaag aagatggagg aagtgaatac cacctattcc  
12541 gacccatgt atcggaaga attgaacaac accatcatcg ccccggtct tcgtcacaat  
12601 ggacgtgaca tggcaagggt ggaatcactc aataatgaga tatgatgtca aaaacaagaa  
12661 gtgatttct atcattatat gccgcttaa cccagctct ggccagtgt aagtgtggca  
12721 acgtggacta cagctgggga gcggacgac ttgcgagtgc ccatgactat gccgtgacga  
12781 tgatgctcta tatcgtttat ctgtgctatg cagtggcggg catcgtggtc atagtcagcg  
12841 cttgcagat atatataaag atgaatcgg gcgaagaagg agtgaagaag aacatcatga  
12901 tgctggtggg agcctgcctg ttctcatag gagcgacct cgtcttccc gctttctcg

12961 gttatcagat ttgagataca ggtgatacga gataagataa ctcaaagtgt aacaaattaa  
13021 aaggtaaaaa gaatgttga aaggattaac aagaaggtga agggattctt ctctcacag  
13081 cgcatgaaaa cgctcgccct gatgttgctt gtcggcacca ccgacgcaat ggacagaaac  
13141 gcagccggcg actactcggc aggaacgacc gcgcttacca cagtacgga ggagattgcc  
13201 aagtatgtac ctatcgtggt gaagctctgc tatgccattg caggtgtcgt tgcaattgtc  
13261 ggagccataa gcgtttacat cgccatgaac aacgaggaac aggacgtgaa aaagaagatc  
13321 atgatggctg tcggcgcatg tatttcctc attgcagcag cccaggcact gcctctgtc  
13381 ttcggcattg gaggttaaac gcagcgtgag attgtgagta tgtagaacgt taaaacactg  
13441 acagttatgg cagatacaaa gcaagagcgt tttccgatt atcccattt caagggactg  
13501 caacgtccat tggagttctt cgggttgacg ggacgctaca tctactgggc ggacgccc  
13561 gcaggaggag ccgttcggg tttcatctc ggctactgca tcttcggtt cgtggcagga  
13621 ctctgtctgc tagtctcgc cgtagctgc ggtggcgtt tcctctcat gaagcagcg  
13681 aaggcctgc acagcaagaa gtagacaac ggcatattca tctatgccta tcaaagaaa  
13741 gtgtaaaaca aaaaagagaa tccattatgt ccaagtggaa agctatcaat gattgtaagt  
13801 gaatggaggt gggggcatca cgcatgaggg tgcgccgcc ttttgcgat taaaaagaa  
13861 aaagaacaat gaccctatac atcactca tattctcagc catctcgtg ggcatggcca  
13921 tcagtgtcaa ggcattcggc acgggagga agcgaagcg catctccag gacatctact  
13981 tctccatcga ggaagtggat ggcatcggc tgctctatac caagacgggc gaatactccg  
14041 ctgttctgaa gatggagaac cctgtgcaga agtattccgc caacatcag gcctactatg  
14101 agttcacca cctctcgc gccctgccc agacctggg cgaaggctat gcgctgaca  
14161 agcaggacgt gttgtgagg aaggcattca aggaagagaa cggtggaat catgattcc  
14221 tgagcgagag ttactccgc tattcaacg gcagaccct taccgacagc gtctgctacc  
14281 tcaccatcac acaggagaac aagaagagcc gtctgatgc gttcgacaac aagaaatggc  
14341 gtgacttctt ggtgaagata cgcaaggctc acgaccagct gagggatgcc ggcgtgaagt  
14401 cccgattcct cggcaaacg gaagcctgc agtatgtgga ccgttctc tccatgaact  
14461 tccgtgacaa ggtggtgctg atgaccaact tcaaggtcga tgacgagacc atcggcatgg  
14521 gggaccgtag ctgcaaggtg tatagcctg tggatgtgga ttatgccaac ttgccgtcg  
14581 tcctccgtcc ctacgcaat atcaggtga acaacaccag tatgccgtt gatctcgtga  
14641 gcatcgtcga tagcgtgcc ggagccgact gcgtggtgtt caaccagatg gtgtcgtgc  
14701 ccaaccagaa gcgtgagctt gcctactcg acaagaagaa aaaccgcat gcctcatgc  
14761 ccaacccag caacctgat gctgtagagg acatcaagcg tgtgcaggag gtgatagccc  
14821 gtgagagcaa gcagctcgtc tataccact acaacctgt ggtggcagtg agcggcgaca  
14881 ccgacataca gaaatgcacc aacctctc aaaactcct ctgcgcatg ggcatccaca  
14941 tcagcaagcg ggctacaac cagtggagc tttctgca ctcttccc ggcaactgct  
15001 atggcatgaa tgccgactac gaccgattcc tcaccctcg cgatgccccc acctgtctga  
15061 tgtacaagga gcgcatcgt cataatgagg acacccgct gaagatatac tataccgacc  
15121 gccaaaggtg gcccgtagcc atcgacatca caggaaagga gggaaaggag aagctgaccg  
15181 acaactcga ctttttgt ttggctcct cgggcagcgg caagtcgtc cacatgaaca  
15241 gcgtggtgag cagttgtg gagcagaaca ccgacatcgt catggtcgt acgggtaact  
15301 cgtatgaggg actctcagc tatgtggcg gcaagtacat gcctatac gaggacaagc  
15361 ccatcaccat gaacccctc aacatcagca agcgggagct gaacattgag aagatagact  
15421 tcctgaagaa cctgatactg ctgatatgga aaggctcga gacgagata cccgaactgg  
15481 agttccgtg cgtggagcag ttggtgacg agtattacga tttctattc aacggtgtc  
15541 agccctatcc ttctcacag aaggagacac tgagaaaaa cctctccacc atggagaagc

15601 ggcgccggcac ggagctgacg cagatacacg acaaggtgga gaaactcatc aagggactgg  
15661 aggaacggcg catggcattg agcgtgaaga ccctctcctt cgactcattc tatgagttcg  
15721 cctgtgagcg tctcgaccag atctgcatcg agaacaacat caccacatc gactgacgaca  
15781 acttcgcta tatgctcaa aacttctacc gtggcggcaa gtacgacaag atttcaacg  
15841 agaacgtgga tagcaccttg ttcgacgaga ctttcatcgt cttcgaggtg gatgccatca  
15901 aggagaacaa gcagctcttc cccatcgtga cgctcatcat catggacgtg ttcctgcaga  
15961 agatgagcct gaagaagaac cgcaagtgcc ttgtcatcga ggaggcatgg aaagccatcg  
16021 cctcgccgct gatggccgag tacatcaagt acctatacaa gacagcccga aagtctggg  
16081 cgagcgtggg cgtagtaca caggagatac aggacatcat cggcagtccc atcgtgaagg  
16141 aagccatcat caacaactcc gacgtggtga tgctgctcga ccaaagcaaa ttcgtgagc  
16201 gattcgacga gatcaaggcg atattagat tgacggatgt ggattgcaag aagatattca  
16261 ctgtcaaccg cttggataac aaggagggaa gaagtttctt ccgtgaggtg tttatccgac  
16321 gtggatcgac gagcggagtg tatggtgtgg aggagccgca cgagtgtat atgacctaca  
16381 ccaccgagcg agctgagaag gaggcattga aactctataa gcatgaactg aagtcagac  
16441 atcaggaggc tatcgagcgg tattgcagag attgggatgc cagtggcatc gggaagtcgt  
16501 tggcatttgc gcagaaggtc aatgagggcg ggcatgtgct caatttgacg gacgatggag  
16561 ccactcgccg ctgacacggc gagcacgggg gctgattgat ggaaacggaa atcccgaat  
16621 agacgtaaag cccagatgcc cgaaagcaaa actttcggga acggtggctg gtagtattt  
16681 acgattagta gtaaatacga ttagtagtga atactaccaa tagtaaatac tacaagtagt  
16741 aaagtagtgg aatagtagaa actgaaagta gtaaaaactg aaagtagtga agcaatgaga  
16801 cgtttatacc ttattataat atatatgtgt cttacacttg tcgtgggaag ggttcatgag  
16861 cagtattaca gcgtgaacta cgacaagcag atcgttgccg ccatggctgc cgcattcggt  
16921 gctggagcta tggcagagag ctattataac gagcaggtgg gcgaaatctt gaagcactac  
16981 aatgccgagc aggttgccac tgccggcatc ttcgctgcca agttcttggg gcgcaaggca  
17041 ttcaccgacc tcggcatttg gagcagtagc acggagaact actattaccg ccgcatccac  
17101 aataggtgag cgaacaagat tatgcccaag atatggacgg tggcaggaat gatgctgaaa  
17161 agtccgcaga ccgccctcta ctggggcagt tacctgatga agatatgagc cgacacaaag  
17221 tcgctgtgta tgacgttga gtagtctgtg accaacagta gcttgacctt tgccgacatt  
17281 cagttcttgg aatcaacca agagatagcc gccatcctca aactctcggg gataggcaat  
17341 gtagattggc agcagctgtt ggatgacatc gccagtgtgc ccggcaactt caccgtggag  
17401 aacctaccg ccgacatcga gacgctttac aatatgggag catcgttggc gacggcaggt  
17461 atcaacgggg catcagggcg actcttgag cagagtgcct tcaacgacct tttcaatggc  
17521 aaggtgagta aatcatcga catctatgac aactaccatg acctctatga acaggcagag  
17581 aacggcatcg gcagcacact ccttagtctg gtgggtggcg aggacaactg ggcagccctc  
17641 ttcgacctt ccaactacaa catcacctcg tggatgacag actatctgag cgagacgag  
17701 ggcaactact atacacagcg ttggtacatt gcccagcag accaaggcag cgtaagcctc  
17761 tgtgactact atccgccgac cgatgacaac agtattctga acggtgacca ttggtatcgt  
17821 atcaacacct ccgacccaa cttctacctt aacagcagc agcgagagca gatactggcc  
17881 aactcggaga accatgccgg atggagccg agccgtgtgc agcagctcaa cggccagagc  
17941 gacggcttca cctatacagat gaactattgg atgtcgtcgt acatcatcag ccgtggcggc  
18001 aagcagacca agaaggccta cgcctacgag atacacgtta ccaagagctg gaacaacgtg  
18061 gaagaggtgt atgaggatgt cttcactcc tacagcatgg acttgaatac cttcaagcgt  
18121 cagttgagc cagctctc ggagataaac gacaacgagg agggctatgt ctattacatc  
18181 ggagctgacg cagccgtta ctatcaagcc accgatgcc ccaaactgaa gggcgtggag

18241 agcgtgacca tcagcgtcac ctgttcggac ggtgtcacc tcggacaggg cagcacgag  
18301 tacaagtgcc gtgagtgcgg cggttcgtc aatgcccaca gcaaggaatg cgccatgagg  
18361 acaagcgtat cagaaaataa tctcgaccta tcggaactgg acgagaagga acgtgaggcg  
18421 aatagcaaga tagccttgtt ggaggcgag ataagccagt tggagacaga gaacaggaac  
18481 ctgctcacgc agatagccaa tgcctctgtg gaggaagccc ctgccttgcg gcagcaaat  
18541 aatgtcaaca agacgaagat agacaacctg aagaaggaat tggcgacatg gcagcagcag  
18601 ttggcagaca tacagaatgc caagagcgag gcggctaacg acaatgccac ctccaccgat  
18661 gactactacc gcatcctgc catcatgcag gatgtgaagt cagcctacaa tctcactgg  
18721 caaggtgccg gttcgtggaa cggctacacc tacgtccgaa ctgccacat gcccaacatc  
18781 aacggcatta tcaccttcaa ggcgacctg tccattgcaa ggaagccaa gtacttctt  
18841 ggcatacaaga tacaccgtgc gatactgcaa atactgtggg agctgacctc ggaatacacc  
18901 gacacacagg tggatgatg gctgacctt gaccgcaatg cctctgacga ggagaagacg  
18961 aggcaggtga acagccgtat ctggagata gcccaggagt tcccctcgtg cagcatcacc  
19021 acagaatatg ccaagagcga ggcaaccag accgccgaca atgacgatgt aatacacctg  
19081 ctctggtcga gcgacctct ggagatagcc cgtgaagtag atagccgtat caccaagatt  
19141 tacgccgact tggatcatt agaaaaatg atgcactaca agcgcagcat cattgacgtg  
19201 ctgaaggaca ttcttcttc aatcgacgca gaccaaggtc gcagaaggac actcattgaa  
19261 gagtgtctag agcgatggag agagaatgca gaccctaaca gagggatgg tgaagataac  
19321 gagaacgaaa actgagggag gaacggagaa tgagacatac catcatcata gctctcctg  
19381 tgattacctt cttcccaat acagccttg cgcaatgggg attcgatgcg gtatcgggtg  
19441 aagcatacat caacgaccac aagaagcagc gcagcctctt gctggcacgc agcactttg  
19501 agtacagcaa tcaactgctg catgaatata gcagtgaaga ggtgggcaaa tacaaggaac  
19561 tgaatgtgga tttggacaaa tacaccggg ccttcgacat catcgatgtg atgtaccagt  
19621 cgttgccgac ggtgctgaac gtgaagagca cctaccagac ggtgagcgac cgcacatg  
19681 actacaagaa cctgttgag gacttcaatg ataaggtcat caagcggaaa cacatcgaac  
19741 tggctgacac gatgctcatc agcatcaaca agaaagccat cgacaacata tacaacgaag  
19801 gaagccaact ctacatagc gtcaacgacc tcgtgttga tgccacagga gcggcagcct  
19861 gttcaactc cgacctgctg atggtgttg acaatatcaa caattcgtg gacctgatg  
19921 aaaaacatct gaaccaagcc tacttccaga catggcggtg tgtgcagctg cgcattggct  
19981 attggaagga gaaggtgat cggacgagga cgaaggaaga gatactggaa gatgccttca  
20041 gccgatggaa agtggcagga aaactgact attgacggat tgtaacaaa agaagaacgg  
20101 acatgaagaa gacaatgata ctcatcatgg cggtagcaac caccatcaaa gccacagccc  
20161 agagcgtgac ctacaaccac gactcctca agcagaacca gataacggtg atggagacag  
20221 tggcggttc tctaccctt gatttctatt attggctgtt acataacaac tataagaaga  
20281 cagcggcaga gaagaacaag ttaggttcc gcactcttc cggcatcaac ctctacaacc  
20341 aagtagatga tgcggagaag atagactctg ccctaccaaa gcgtgctgag gtggaagcct  
20401 tgaacgtagc cgaccgacag atagacctg cctggcttgc cgaagcagc aagatcaacg  
20461 gtcagtggaa caagatgaag gcgaacatag accatatcat ccctacagga ggcacatca  
20521 acgacaagcg tcggtgggag gaactgtaca atatgtacca gtgtgccgtg aaagccacca  
20581 aggatgccta tatgcccaat gcacagagaa agcggcagta tcttagcatc tatgccgacc  
20641 tgacgacaca gaacgagaca ctactgaaat acctgtgca gctcaacacc caaagccaga  
20701 ctaccgccct cttggcagcc accaacgacc gtgtagtaca taaaggcagc atcatcagcg  
20761 atgccaagag ccgttggcag gaaaacatga agggcgtgag gagctcgaca ggcactgacg  
20821 gcgatgatgc caacagcggg gaggtgaa agagtgtgaa cagatagaaa taagggaaga



20881 gaagaaataa tcacaaaaca gcatagagat atgaacgata ttcagatfff caacaacgag  
20941 gaattgggag cagtccgaac cacaggaaca ccagagcaac ccttgttctg tttggctgat  
21001 gtggcaagag ttcttgact aaaaaccagc aagttggtac aacgacttc ggatgatgta  
21061 ctttcaaagt acccatctc ggatagtctt ggaagagaac aggttcaaaa ctttatcaat  
21121 gaagacggac tgtatgatgt catccttgac agtcgcaaac ccgaagccaa acgtttccgc  
21181 aagtgggtga catcggaggt gctcccctct atccgcaagc atgggtccta tatgacacag  
21241 cagaccatcg agaaggcatt ggagagcca gacttctga tacggttagc agtcaatctg  
21301 aaggaagaac gacaaaagcg tctgcttgc gaacaggagt gtgaacacca aaggacacg  
21361 atcgtttagt tgggatccaa ggtggatgac ctgcaacagg aggtgacgga gatgaaggac  
21421 aaggtgagtt acctgacat catccttgcc acgaagagca gtgtcctggt cacacagata  
21481 gcacaggact atggcagtc gtccatccgc ttcaaccgac gtctgaagga gatgaacatc  
21541 cagtatcagc gtggcaagca gtggattctg tatgccgact acaaggactg cggttatgtg  
21601 accagcgaga cctacctat taaacacaag gacggtacgg aggatgtgctg catgaacacc  
21661 aatggacac agaaaggtcg ccgcttctc tatgagaaaac tgaagagcgt gggagtcatt  
21721 cctgttatcg aaagaacata aaataaagaa atagctatgg aatcaatc aaaaatacag  
21781 ttacgtctct atgccgcaa gaggaaaaac ggcaagtggc agttggagat gtcaaggatg  
21841 ccgaagcgaa tcagcgttat cggcaggaca cccatcgttg atgagcatta tatgccatct  
21901 gatttagagg tagtttcaat gtcaaagctt cacaatatg tcggaagta ctacggcaag  
21961 atttgaaga cctcaaaga ggaaggcatc ataccaagg aatatggaat gtggaaactg  
22021 cgtgaagacc ttcaggaaa gggcattgctg gtatatgtca caggcaggat gctgtgctc  
22081 taccacttct atctgtcatg gacaccgaaa ggcatagagt ttatcaaaga gattatcaac  
22141 aatagaacca ggcatgatg gcagacaaca tactcagcga tttcggcatc aatcctctg  
22201 aagaggagat tgacgatgtg atattcaga ccaacgagtt cctgaccgat gccacctca  
22261 caggctcaca agggccgctt tgggtgatcc tccaatgtg tatggcattg gcggcactgt  
22321 tctctatcat cgtggcggca agcatggcct acaagatgat ggtgaagaac gaaccgttg  
22381 acgtgatgaa actgttcaag cccttgggtg tgagcatcat cctctgttgg tggtaaccac  
22441 ctgctgacac aggcattgacc aacagcggca gcagctggtg cgtattggat tttctatct  
22501 atattcccaa ttgcatcggc agttacacc acgacctta tgaggcagag gcgaccaaa  
22561 tttccgaaa gttgaggag gtgcagcagt tggatatgt cagggactcg atgtactg  
22621 acctcaggc acaggcagac gtggcgata agggcacatc agacccaac ctgatagagg  
22681 cgacgatgga gcagacgggc gtggacgaag tgaccaacat ggagaaggat gccagcaaac  
22741 tgtggttac ctactgacg gcaggggccc tgggtggcat cgacaagata gtgatgctga  
22801 tagccctgat cgtgttccg atcggttggt gggcgacgat atactgtcag cagatattg  
22861 tcggaatgct cactatattc ggtccaatac aatgggcatt ttcgttctg ccaagtggg  
22921 aaggagcgtg ggcaagtgg ctaaccggt atttgacagt tcatttctac ggagccatgc  
22981 tctacttctg cggtttctac gtctgttgc tgttgatat tgtgctctg atacaggtg  
23041 agaactgac ggcatcacc gccagtgagc agacgatggc agcctatctg caaaactcgt  
23101 tcttctggc aggtatctg atggcagcga gcatcgtggc gttgaaatgc ctgaacctg  
23161 tgcccgaact tgcggcatgg atgataccag agggcgacac cgccttctca acccgaaact  
23221 tcggcgaggc cgtggcaca caagcaaga tgacggctac gggaacctg gcgacctga  
23281 tgagataaca tgtgagtgtg cggtagtca ccgcacctcc tattgaaaca aataaaagta  
23341 accatcaaga aaaatgaaag caaaaaatga aattgagcgt tggctcaaag atgagaaatt  
23401 catggcgtt gccacaagc gtgcaagga agagttttc aattccgaaa acaactacat  
23461 cgaccacag tatgaggaga tggcagaagg ctttggagat aacgacgagt atgtagtcc

23521 tatgtagat tacctgagtt atcgcttga tcgtgcaaaa atctacagaa atcgacggag  
23581 acgtgaacgt gacatctggg ggggtgtggat ccaactgaaa tacgaaggca tctacgtaga  
23641 ggcttgcatc aagtattacg ccaaactggg ggaagaagtt gagaaggaca tataccat  
23701 cctgcaccgt gaatatgtga gaatgaagag aatcagacc tcaaacaagc agtaacgtat  
23761 ggtaatcaag aacttagaaa acaaaatcaa gctgggtggc atcatctgct ctgcgttcct  
23821 catgggctgc atcatcatct cgggtgctgag catctggacg gcgctgca tggtagcga  
23881 cgcgacgcaa aagggtatg tattggacgg caacgtgcc atactggtga accgaccac  
23941 gatggaggaa acgctggatg tggaggcaaa gagcatatc gagatgttcc accattact  
24001 ctttacgctt gctccgatg acaagtacat ccgctattcg atggagaagg cgatgtatt  
24061 ggtcgtgaa actggtttg cgagtagaa tacgctgaag gaaaagggtt ttacaacaa  
24121 tatcatgggt acgagtgcc tttcagcat cttttgcac agcatcaagt tcaacaagga  
24181 gaagatggag ttcacctact acggtaggca aaggatagag cgaaggagca atattctgat  
24241 gcgtgaattg gtgacggcgg gacaggtgaa gcgctgccg aggacggaga acaatctca  
24301 tggactgctc atcacgaact ggagaacctt gctcaacaag gatattgagc agaagtcgaa  
24361 gtcaaacttc taatccta gcggtatgag tgtaaaagga atcagacgga tgcttggg  
24421 cgaggatag cccgacaaga acgacccaa gtacaagaag cggtatgaga aggaggtggc  
24481 ggcagggcgc aagtttgcca agaccgcgag gatagaccgt gcggcggtc aggtgcaagg  
24541 ctttgccaat gccacaaga cgctgttct cgtcatctc ttcggcttg tcgccacgtg  
24601 cttcggcatc aacatctaca ggatggtgag gtattacgtt catcggacgg aggtgcaag  
24661 tgccatcgag cggcaggaag ggcgcatgaa gcagatgat aatgcagccc attgcatcac  
24721 tcctcccgtg acgcatcgaa ccaacgagga gaatcgagac aagtcagtaa catcaaatc  
24781 agacagcgt gagaataaca gataagataa acttccgtca gccgaagtac atgctgccag  
24841 ccatcgtgta catccgttg attgccacag gctattttgt ctttgacatg ttcaatacgg  
24901 aggtggcgg aacgcaggac aagaacctgc agaccaccga gtttctgaac cccaacctgc  
24961 ccggagcgc gattaagaat ggtgacggca tcggtggcaa gtatgagaac atggcgaagt  
25021 cgtatggtcg catagcagac tattcggtg ttgataacat tgagcgtgac aacgaagaag  
25081 agaaagaagc gtatgaatcc aagtacacag aagaagacct tcggaactc gtccgtcagg  
25141 cagaagagaa ggacgatgca gccgaagtgg ccgatgcaa ggcgagagaa gcggaagcac  
25201 tcgaagcact caacaaggca ctgccgaag cgaggctgag aggacaggcg gcagttgcc  
25261 ccgtggcca ggataccaca caggctggg ctccaagga gcagattgag gtgaaaggtc  
25321 agattgccga ggacagcaag gcggtgaagg cactggacga ggaggacaag gcacaggagg  
25381 tggtagaaga ggtgaaggtg acttcggact atttcaacac cctgacgag aacgagcatg  
25441 agccaaagct catcaaggcc atcattgacg aggacgtgaa ggctacggac ggtcagagg  
25501 tgcggctgag actgttgac gatattgaga ttggtgagac cgtggtgag aaaggtcgt  
25561 acctctatgc caccatgagc ggtttcggtt gcagcagag gaagggtagc atcaactcca  
25621 tccttggtg tgacgagctg ataaagttt cgcttcgct ttatgacac gacggactgg  
25681 agggactgta tgtccccggc agccagttcc gtgagaccac gaaagatgtg gcgagcggg  
25741 ctatgcagag caacatgaa atcgaccaga gtggagcga caacagttc tcgcaatggg  
25801 gaatgcaagc cgtgaccaat gcctaccaga agacaagcaa tgccatcagc aaggctatca  
25861 agaagaacaa agtgaagctg aagtatggga cgtttgtta cttgtaaat gggaaagaga  
25921 aaaggaaata gacactgcc gacaacggaa ttgtcgggaa cgtggctca tagagtataa  
25981 acatcaaaaa atcaactaat atgaattgt ttcagaaaat gaatgtctgt gcattgctt  
26041 cgctgagcgt gctttcagcc aaggcgcaga ccacctacat ggagatggag cagctgacgg  
26101 tcaacgacca agtgaccacc gtcatcccg cctccgaacc catccgctt gtcgatata

26161 ccacagacaa ggtggtgggc gaccaacca tcaacaacac catccgctg aagccgaagg  
26221 acaacgtgta tgccgacggt gaggtgttg cgatagtgac aatcgtgacg gaacgctacc  
26281 gcacgcagta tgactgctc tataccacga ggatgcagga ggcagtaacc gataagggaa  
26341 tagaatgctc ggagcgcgat gcctacaaca atcccgctgt aagcctgtcc actgccgaca  
26401 tgaccaagta tgcacgtcag atatggtcat cgtctgcaa ataccgcaac gtggcgacga  
26461 agatgcaccg catggtaatg cgctgaaca acatctacag cgtggcgaa tatttctca  
26521 tcgacttctc cgtggagaac aagaccaaca tccgcttca catcgacgag atgcgcatca  
26581 aactatcgga caagaagcag agcaaggcta ccaatgcgca gatagtggaa ctgacccat  
26641 ctctgtgtt ggacgatgcg aagacattca agtatggcta tcgcaacgtg attgtggtga  
26701 agaagatgac cttcccaac gacaaggcgc tgaccatcga gctgtcgaa aaacagataa  
26761 gtggacgcac catctgctc agcatcgact atgaggatgt gctgtctgcc gattcgttta  
26821 accataact gttggaggag gaataatgag aattaggaat gaggaattag gagtgaggaa  
26881 ttgcttctg catacctac tcgtgtcat ctgtttatg gcaagcatga ctccgcaat  
26941 ggcgcagcag aatagcgacc gcatatcctt ggggttcgga tcctgtatg agcgaggact  
27001 ggacgtgacg ctgtctacg agtatgagac gaagtaccac aatgcgtggg agtattttgc  
27061 aaacggatat atcaagtga acgagtcgc atcgtgcggt catgtctgtc ctgagagttt  
27121 ttggaacaac taccgcagtt atggtttcgg cttgcctat aagccctgtg tggcaagagg  
27181 acgcaaccac catggcaaca tgcgcatagg agcatcgca ggtagcgata ctgacaggtt  
27241 cttgggtggc atccacctc gctatgagca aaactataca ctgacacg gctggaagct  
27301 cttctggcag gtgaagaccg atgtgatgat caagggtgaa gacctgtca gaacgggat  
27361 tgcctgggt gtgaaactc ctgaaaatg actatgcgta tgaagaaact gtttcaatc  
27421 ttggcagttg cggcaacggt gttgctgact gcctgtgac agcatcagga cttcccgc  
27481 acagccatga aggtcacca tatctgacc actgacggca aggtgatgcc ctacgaaacc  
27541 tacgagcaat cgtgcaagca agccattgca gtggtgttca acgtcaatca gaggaagaa  
27601 atggagggaa acggatatgc cgtctatctg tgggacatcg ctcccgaagc cttgtctgac  
27661 agtatcggtg tgaacagga cacatcctgt gacctaccg cctacgacgg caacaagaac  
27721 acttttccc tttatggcac gaccgatgtg aagtcgcctt tggctgagcg tgtcttcgac  
27781 atgtggcgtt acgggcaaag tgcctatc cccagtgtgg cacagatgcg tctgctctat  
27841 catgccaagg acatcatcaa ccatacatc ctgaaatgcg gcggcacacc tatccccgat  
27901 gaggatgatg actgttgta ttgacttca acggaggtag aaggacaagc gaccgcaag  
27961 gcatggcttt actcactggg aagcgggtcc atacaggaga ctccaagtg gcagccgat  
28021 aaggcgagac ccatcatcac gattatggat tagcccatat acagacatcg agtatcacc  
28081 gtatcatcat caaagtaca caattaaaa agaaaaagca tgaaaaagaa tttgttcta  
28141 atgtgggac ttggagccat gtcctcacg tcctgtgacc aagacatcgt caatgagatt  
28201 tacctgcccg gtggcggagg ttctgtggtc gtgaccgaca gcacatcaac caagcagctt  
28261 caggtattca ccaatctgga gatgctgcaa cctgccgtt ccacagagc cgttgacaac  
28321 cagtgggaac tcaatgatat gattggcatc tctccacag ggatgatcaa caatagaag  
28381 ttcacccgaa gcggcggcac gaatcagttt gtgtcagca acaaggtgtt tttcacggac  
28441 acagacactc acacattca tgctactat ccatacgg caaatcctac caacgacctc  
28501 atagagtcc aagtccgga ggcagctgta cagagtgagc agaaggtcaa tgattttctg  
28561 tttgccagtg gagcggcatc atacccaat ccgagcctta cattgaactt caccatcag  
28621 atggtgcgtg tcatcatcaa ggtctatacc tcaccagaat acggtttcac caccaatgat  
28681 tttcaggaa gcctactcac gttcgtcggg tattttgaca gcggtactt caacatcaag  
28741 accgaaagg tagaatgcag tgacgagtc gtgacgacct attatttcgg cgaccacaa

28801 agtgaccaca tggaatatac gctttatggt cctgcacagg ttatgccaga catgacattg  
28861 caactcagca atggggagaa cttcgtattc ctcaaaacg acacgtggaa agcgggtcat  
28921 tcctacagct attcattgaa gcctgtacgc aacaccttgg aggtcatatc tgcaactatt  
28981 tctccgtgga cagtagagtc tgagaagacc atcaacggct acgaataaaa ctataagag  
29041 gattggaggg tgtccaccgt ggcaccttc atcttttctc attatcacc aacatcatcg  
29101 taaagtaa at ggaagaaagc aaagagttac agggttttta caagatattc agggcgggtga  
29161 tttatgtctc catcctgatg gagttcttcg cctacgcact ggagccggag cagttggact  
29221 tcttgggagg cgtagtgacg gatatacaca ctcgcatcaa gcgggtggatg atttaccatg  
29281 acggcaacct cgtgtatagc aaggtggcta cgttctgct gatatgatc acctgtgtgg  
29341 gaacgcgcaa caagaagcat ctggagtttg acgctcgag gcaggtgctc tatccgctgc  
29401 tgtcgggagt gctgctgatt gtgagtcg tatggctgtt cggtcattcg ataatgcct  
29461 gtttctatac cctccgttg aacacttggc tctatatgct cacttccatc gtcggtgctc  
29521 tattggtgca tatgccctc gacaatatct ctaagttcct gaaggaaggg ctgctgaaag  
29581 accgctcaa cttcagaaat gagagcttg agcaatgag ggagttgag gagaacaagt  
29641 acagcgtgaa catccctatg cgctattatt acaagggcaa gttccgcaag ggatgggtga  
29701 acatcgtcaa tccgttccgt ggcatatggg ttgtgggtac tctggttct ggtaagacct  
29761 tctccatcat cgagccgtt atcaggcagc acagcgagaa gggcttggc atggtggtg  
29821 acgactataa gtttccact ctgccacca aacttacta tcattactg aagaacaaga  
29881 atccaagga cagcaagatg cccatggca tgaagttaa catcatcaac tttgtggatg  
29941 tggagtattc ggcctgtg aacccatcc agttgaagta catcaacaac cttgccgag  
30001 cgagcgagac cgccgagacc ctgctgaat cctgcaaaa aggcaagaag gaaggcggcg  
30061 gtggcagcga ccagttctc cagacctctg ccgtcaact cttgccgcc tgcattat  
30121 tcttctgaa ctacggcaag gagccctacg acaaggacgg aaagatgctg attgccgagc  
30181 ggcgtgaaga ccaaagacg aaaaggctga taccacagc acgggtgtc gaccattcgg  
30241 gcgaggaggt gcagcccgt tattggttg gcaagtacag cgacatgcca catatcctat  
30301 cgttctcaa tgagagttat cagaccatct tcgaggtact tcagaccgac aacgagtag  
30361 ccccttctg tggcccgtc cagactgct ttgcaaaa agccatggag cagttggaag  
30421 gtatgattg cacgctact gtctatacct cccgtctcg caccaaggaa tcttactgga  
30481 tattccaaa ggacggcgt gacttcgacc tgaaggtcag tgaccgaag aatccaagtt  
30541 atctgctcat tgccaacgac cccgagatgg agagcatcat cggtcactg aatgcctga  
30601 ttctcaaccg cttgtaacg agggtaata caggacagg caagaacgtt cctgtcagca  
30661 tcatcgtcga tgagttgcc acctgtatt tccacaagat agaccgactg ataggcacag  
30721 cccgaagcaa caaggtgagc gtggcactg gcttcagga actccgag ttggaagccg  
30781 attatggcaa ggtgggtatg cagaaaatca tcaccaccgt gggcaatgtg gtgagcggtt  
30841 cggcaagagc caaggaaacc ctcaatggc tgcgagtg catctcgg aaagtagtgc  
30901 aactcaaaa ggcgtgacc atcgaccgtg acaagacct catcaacct aatgagaata  
30961 tggacagcct ggtgcctgca agcaaatct ccgatatgcc cacaggttg atatgtggac  
31021 agaccgccc tgacttctg gtcaccaaga cgggatgaa cggaagcatg aacatccagg  
31081 agagcgagga gttcaagaca tccaagtct actgcaagac cgacttcat atgacgaaa  
31141 taaagaagga ggaatcgag tatgtcctc tcctaagtt ctataagttc aagtcgaaag  
31201 aagagcgaga gcgcatctc tacaagaact tcgttcaggt tggggaggac gtgaaagcca  
31261 tgattaaaga gattcagcag ttccgacta tgatgtagt atattgatta gattgcgggtg  
31321 agacatcga cctctatat aaaataatgt aatgagaaga tacatcatc tactattgag  
31381 catgttggc atctgtagc tgcctgtca aagccaaacc attgacagg cactgttga

31441 acggatggta gccattacca aacacttcga gggttggcac gacccaaaga ccacaccggg  
31501 ctatgtgggc tatggtcacc agctacagaa gggagagcgt tccccaaaa cactgacacg  
31561 tcagcgtgca gatttgctgt tacggacaga cctcctcgg cacctgcgcc tatatgcccg  
31621 ttatggcagg gatgcttacc tgcttgccac cctctctac cagattggac cagccaagtt  
31681 gttaggcaat ggacgatacc cgaaagcgtc cctgctcacc cgattggaac gtggcgacag  
31741 ggacatcctg cactctatc tgagctattg caaatggagg ggaaaagcag tggcatccat  
31801 taggaaacgg aggtgggtgg aatatcagct gttgatgcc gagcggtag gcacatccc  
31861 tcctatacct gttgtctgt cacttatatt atataaaag gtaataattg caatttcaat  
31921 gttaaagtca gagcattatg gcatccatca aattaaagt cagaacatca tctgttcaag  
31981 agaaagaggg tcgctgtat tatcaggatg tacacaatcg tgtggcacgt cagatccata  
32041 cagagtacag aatctattcc tcagagtggg atgcggacca tcaaacatc attttgcaa  
32101 cttccgtcac tccacaacgt caagcctatc ttcttctt gaaagataca ttggatgctg  
32161 acaggaagaa actgctgttg gtcattgcac ggttgacaa ggaagggcag tcatatacag  
32221 cagacaccgt cgttgacaac ttccatgagg gaaaagaatt acatggcatt atcggctata  
32281 cgctggagtt gaacgaaaaa ctgagacgca tcggcaagaa gcggatggta gcaaggtaca  
32341 aaaccacct caacagcctc cagcgttacc tgaaaggagg cgatgtgcca ttggaggaag  
32401 tcgatgggac aacgatacaa ggctatgaac agtggctgaa agacagcggg ctgtgccgca  
32461 acaccctc tttctatc cgcaacctgc gcaccatcta caatcatgcc gtagatgacg  
32521 gactggctat ctcttctca cgttcaagc atgtatatac cggcatcgac aagaccgtca  
32581 agcgggact cccctggaa atcatcaagc aactgaaaga gctggacttg agtctgaacc  
32641 cccgtttgga gcttgcaagg gatattgctc tttcagttt ctataccctg gggatgctg  
32701 tcatgatata ggcacaactt acaccaagca atctgcatgg cagtacgctc attaccgcc  
32761 gtcagaagac ctcaaacag ttgacatca aatgggaacc tgccatgcag gagatagtg  
32821 cgaagtaca aacagatgat tctcctacc tgctcctat agcaaaagga gagggagcca  
32881 tttctggag acagtacaag aatgcctata gccgatcac caagcagttg aagaaaatcg  
32941 gagaaatgat aggcctgtcc gtaccctga ccacctcgt agcccggc tctgggcaa  
33001 gcatagcaa gagcaagaac gtgccgtat ctactatcag cgaggcattg gggcatgact  
33061 ccgagaaaac cacacagata tacctctct cattggacac ctctgtcgtt gacaacgcca  
33121 acaatctcat catcaattct cttaggagg tgcagcgtct cactgcacct ttatttcaat  
33181 attataact attgtattgc ggtgtgata cgcaactata ataaaccaa aatccgcaac  
33241 tatcatcaa tacacgatta agggtagatt tatgagtcgt tagtagcagc tttcagtaa  
33301 aagcaacagc acaacatcaa tatgtagcca ccatcccctt accccacgat gcgacttgag  
33361 gtaatcgc gattcaaac ggaaagaaag gattcttacc cgaattctgt tttgaagggt  
33421 tttgataag ctccgtctc tgtgtagata ttcagcacgt attgccttc agtcatgatc  
33481 cactggcag gtacggagat gaattcgaag acaaaagcct ttatgagcact cgttttctg  
33541 agccaaaag ccttggtgtc aagcctgctc atgatggtc ttagaaatt gtgtatcaat  
33601 gcagtaagca gaagaaagc agtattctcc gccatgaatg acttggggag cctgctcaa  
33661 ccgaatcgt tttcatgtc gtcaaagata cgttcttc cgccacgag attgtagaat  
33721 tcaacaatgt ccctgtcga tgactgtaa tcgttggtca gaatacaac gtaagtgtat  
33781 tcgcttccc acaggtcaag gtcgccactg ttgcgtctt gtcttgat gacaagcga  
33841 tagcacttc cttccattt ctcaacgaga atggaattga gttcgaactg gatgccgta  
33901 atctctccg tcttcatcc tctcagagca aagatgtcat ttagagcga actgcatcgg  
33961 ttggcacgga ttagaaatg tttcaatgc ttcttatct cactgacgat tctctcag  
34021 caggaaccgc agtctgcct gaagcgatt acacggatg tctgggattc cagaagagcg

34081 aagaatctct tatgggtgct gcctgatga aaacgcacat tcgtgttacc atcgctgttc  
34141 tcgatataga ctatcttctc accgataaca tatacgccag gcctgtagcc gaggaacttt  
34201 ttgtaggtcg gttttgcatc atacttctcc gtttcaagga actgatggtc aaagtcaaca  
34261 tcgtattcct caatttcctt caactcgcct gtagaaacca aagcgtttat aagcaatgtg  
34321 ttgagtttgt ctgcagtatt gaaatcatag gtcttgctt ggtcgggaagt ataggagatg  
34381 ttttctgtg tcagttcctt gatggctctg aggatggat cagagctgca tgtacgaagg  
34441 gtaggatgat acgagagatg gcgcatcagt tgtgacgta catctccac gcatgagccg  
34501 ccacagaaat aaacgctcat cagcgaacgg actatctcgc tgaactgata tccgaagata  
34561 ctgctgcatc tctgaccag tgttgagtcg ataacgggtg aaagcatgga gtcaaattc  
34621 tccatgattg aaaaaattcc tccaaaagggt gtgagtttt cgaattttat ttgtacctt  
34681 gcagcgcctt gttacgattt tcgcttgtt tctaattgca aactaagat aagtgaaaa  
34741 tctgacacgg caaaatccta ggcaactat tgttgctcag gaactataa ataaagtaa  
34801 attatagtgt tgcggaatta aggggttaa aatatacgt gatacaata agaattagg  
34861 agataatata aatggaaaaa tacaacaatt ggaaacttaa gtttataca atatgggcag  
34921 ggcaggcagt atcattaatc actagtcca tcctgcaaat ggcgattatt tttaccta  
34981 cagaaaaaac aggatctcgc atggcttct ctatggctc actgtaggt ttttaccct  
35041 atgcggtcct tggaccagcc attggtgtat tagtggatcg tcatgatagg aagaagataa  
35101 tgattggtgc tgatttaatt atcgagcag ctggggccgt gctagctatt gttgcattgt  
35161 atatggagtt acctatctgg atggttatgg tagtattgtt catccgtagc attggaacag  
35221 ctttctaac cccggctctc aatgcggtta ctccacttt agtaccagaa gaacagctta  
35281 cgaaatgtgc aggctatagt cagtcttgc agtctataag ctatattgtt agtccggcgg  
35341 ttgcagcact ctatactcc gtttgggaac taaatgctat tattgccatc gatgtattgg  
35401 gtgctgtgat tgcatttatt acgtagcaa ttgtacgtat tcctaagcta ggtgatcaag  
35461 tgcaaagttt gaaaccaaat ttcataagag aatgaaaga aggaatggct gtactacggc  
35521 aaaataaagg attatttctt ttattactc ttggaacatt atatatgtt gtttatatgc  
35581 ccataaatgc attatctct ttaatcacta tggaatattt taatggtaca ccgatgcata  
35641 tttctattac ggagattgct tatgcctctg gtatgtgat agggggctta ttattagggt  
35701 tatttgggaa ttacaaaag cgaatctat taataacggc atcaatttt atgatgggga  
35761 taagctaac catttcagga ttacttctc aaagtggatt tttcatatt gtagtctgct  
35821 gtgcaataat ggggcttctg ggtccgttt acagcgggtg gcaaacagct cttttcagg  
35881 agaaaattaa gcctgaatat ttaggacgtg tttttctt aactggaagt atcatgtctc  
35941 ttgctatgcc aattgggtta attcttctg gattcttgc tgatagaatc gatgtaaatc  
36001 attggtttt actatcaggt atttaatta tttgcattgc aatagttgc ccaatgataa  
36061 ctgagattag aaaattagat gcaaaataaa ataaaggagt gtgttcgtat gatataaat  
36121 attattcaat cagtgcaga aaaattatcc tcttgcctt ttatagaagg catcgtatta  
36181 ggggatccc gtgaagagg taccataca gaggattctg atatagatat cggaattat  
36241 tacaatcaag aatcatttga cctgacagcg attaacaaa ttgctacaga gttgatgat  
36301 gagaatagaa acaaccttgt tctacctccc ggagcgtggg gtgattgggt caatggaggc  
36361 ggatggttag ttattaacgg gtatcatgtt gatctgatt tacgtgatat aaaacgggtg  
36421 gaacaaataa tcaaggatac ggagcaagga attgttactg caaattatca gaccgggcat  
36481 ccccatggtt atataagtgc tatgtatcgt ggagaattgg ctatcagcaa gatacaatat  
36541 gctaaaaatg aaagcttatg cgaattaaat aatcaggcgg aaatttacc tgggtctcta  
36601 aagaagagct tgataaactt tttttattt gaagcagagt tctcttaat gtttgtaaaa  
36661 gcaaatgcgg gagcagagga taaatattat attgcaggcc atgttttctg tattattca

36721 tgcttaaatc aagtactatt tgcattgtaaat aatgcttatt gcattaacga aaagaaagct  
36781 ataaaactgc ttgaaacttt tgaatataaa cctaaaaaat atgccgaaag ggtaaatcat  
36841 atttttgaag tactcggctc ttacttttt gaatgctacg atatgaccga gaagctttat  
36901 aaagaagtga aaaaaattgc aacggagata aataactttt taaacgaggg ggaattcaga  
36961 tgaagaaaa caaatatgat gataatata tttttcaaaa atacagtcaa atgagtcgct  
37021 cacagcaggg actagccggg gcaggagaaat gggagacttt gaaaaagatg ctacctgatt  
37081 ttaagggtaa gcgtgtgctt gatttaggat gcggctatgg atggcactgt atatatgca  
37141 tggaaaacgg tgcttctct gtagtaggtg ttgatattc tcaaaaaatg ctggaagtag  
37201 caaaaggaag aaccatttt ccacagattg aatatgaatg ctgtgccata gaagatgtgg  
37261 atttccaga ggagagcttt gatgtaatac taagttcgct tgcgtttcat tatgtagcag  
37321 actatgagaa ttaataaaa aagatatata ggatgctgaa ggctggggc aatttagttt  
37381 ttacagttga acatcctgtt tttactgctc atggaacaca agactggat tataacgaaa  
37441 aaggagaaat actgcatttc ccggtggaca attattatta tgagggcaa cggacagcta  
37501 tgtttttgga agaaaaggtt acaaaatc atagaacact gaccacatat ctaaatac  
37561 tgctttcaa tagttttata ataatcaga ttgtggagcc acagcccca gagaacatga  
37621 tggatattcc ggggatggcg gatgaaatgc gacgccaat gatgctgatt gtatcggca  
37681 aaaagaagat gtaataat agaaaaata aacgaggagt atgtaaatga gatcagaaa  
37741 agaatgatg gatttagtac tttcttagc agaacaggat gaacgtattc gaattgtgac  
37801 ccttgagggg tcacgcgca atattaat acctaaagat gaatttcagg attatgat  
37861 tacatattt gtaagtata tagaacctt tatactaat gatgactggc ttaatcaatt  
37921 tgggaatata ataatgatgc aaaagccgga ggatattgaa ttattccac ctgaagaaa  
37981 gggatttcc tatctatgc tatttgatga ttacaataa attgatctta cttattgcc  
38041 cttggaagag ttagataatt acctaaagg cgataaata ataaaggttc taattgata  
38101 agatttaga ataaaagg acatagttcc gactgatata gattatcatg taagaaaggc  
38161 aagcgaagg gagtatgat attgctgca tgaattttg aatgtaacac cttatgtt  
38221 taaaggattg tgccgtaagg aattttatt tgctattgat catttaac agattgttc  
38281 ccatgagctg ctgagaatga tatcatgaa ggtcggcatc gaaacaggct taaattaag  
38341 ttaggcaag aactataagt ttattgaaag gtatatatcc gaggattgt gggagaaact  
38401 tttgtccacc taccgatgg attcctatga aaacatattg gaagcattat ttctatgca  
38461 tcaattgtc agggcggat ccggtgaggt ggcggaaagg cttcattatg cctatccgga  
38521 gtatgatagg aatatacaa aatataccag ggacatgtat aaaaaatca ctggtaaac  
38581 cggctgctg gatagcacat atgccgctga tatagaagag aggcgggaac agtgattaca  
38641 gaaatgaaag cagggcacct gaaagatc gataaacca gcgaaccatt tgagtgata  
38701 ggtaagatta taccgagga tgaaacgag aattggacct ttacagaatt actctatgaa  
38761 gcgcatatt taaaagcta ccaagacga gaggatgaag aggatgagga ggcagattgc  
38821 cttgaatata ttgacaatac tgataagata atatatctt actaccaaga cgataaatgc  
38881 gtcggaaaag ttaactgca aaaaaattg aaccggtacg cttatataga agatcggc  
38941 gtatgtaagg attcagggg gcaaggcata ggcagcgcg ttatcaatat atctatgaa  
39001 tgggcaaagc ataaaactt gcatggacta atgcttga cccaggaca taacctata  
39061 gctttaaata tctatcataa ttgtggttc aaaatcggct ccgtcgatac tatgttatac  
39121 gccactttg aaaacaact tgaaaaagct gttttctgt atttaagggt ttagaatgca  
39181 aggaacagt aattggagt cgtctgtta taattagctt cttggggtat cttaaatac  
39241 ttaggtaac cttaaaaat tcaaaaaaa ttgtgaaaa aatcgtcaga ttatgtata  
39301 ataaagatac tataataaag gcggtgaa tgaatgcag atcaatctt ttgcggaaga

39361 aacacaatta cagagattat ccgaactcgg agattcattg gaaaaactga atgttataga  
39421 cttgaaatca ttcagacctt tgcttgaaaa ggtaaattgt aaagaacgta aaagcaaagc  
39481 cggcagaccg tcgatgatg ttgtaatgat gttcaaaaata ctcgtattgc aacgattgtt  
39541 taatttatct gatgatcaaa ctgaatacca gataactgat cgaatgagct ttcagcgttt  
39601 tattggctta tcattgggag agcgtgtacc tgatgcaaaa acaatctggc ttttaagga  
39661 taccattacg caaaaagaaa taattgagcc tttatthaat cagttcacag cgcaattgga  
39721 atcgcaaggt attataacgc atacaggaac aattgttgat gcgactttg tggatgcacc  
39781 gcgtcagcgc aacctcgtg agggaaaacaa tcaaatataa aatggcgaga tacccaaaga  
39841 atgggagaaa aataccata aacttgcgca aaaagataca gacgccgtt ggacaaagaa  
39901 aaatgatgaa actcattacg gatataaaaa tcatgtaaaa gtggatgccg acagtaagat  
39961 tattacggat tacgcaacca catcagcaaa tatacatgac agcaatgaat tttcagaatt  
40021 tctcggagaa gctgacaagg taataacgc tgacagcgc tatgtgggaa aagaaattcc  
40081 gaaacatgta gaaaaccgca tatgtgaaaa aggatatcgc ggcaaaccgt tgactgatga  
40141 acaaaaagaa agcaatcgaa gaaaatcaaa aattcgatgc agaattgagc atgtgtttg  
40201 atttattacc gtatctatgc atggcttac tgtgcgttcc attggcataa agcagcaga  
40261 gtttaataata ggtcttaca acctgttta taactttgc agatatacta ttttaaacg  
40321 aaaagaggtg tacatgggat aactatgccc aaatgagaat aattctgaat attagggct  
40381 tatctcctt gaattttag cgagaatcaa tggcaatcgg ctatttctg cttgatatt  
40441 tgaaaaata atcgaaatag caaatatta tgattgggaa tcaatttta gaggttccct  
40501 gtagaaaaga ggaaggaaat aataaatggc taaaatgaga atatcaccgg aattgaaaa  
40561 actgatcgaa aaataccgct gcgtaaaaga tacggaagga atgtctcctg ctaaggata  
40621 taagctggtg ggagaaaatg aaaacctata ttaaaaatg acggacagcc ggtataaagg  
40681 gaccacctat gatgtggaac gggaaaagga catgatgcta tggctggaag gaaagctgcc  
40741 tgttccaaag gtcctgcact ttgaacggca tgatggctgg agcaatctgc tcatgagtga  
40801 ggccgatggc gtccttctg cggaagagta tgaagatgaa caaagccctg aaaagattat  
40861 cgagctgtat gcggagtga tcaggctctt tactccatc gacatcgg attgtcccta  
40921 tacgaatagc ttagacagcc gcttagccga attggattac ttactgaata acgatctggc  
40981 cgatgtggat tgcgaaaact gggagaaga cactccattt aaagatccgc gcgagctgta  
41041 tgattttta aagacggaag agcccgaaga ggaactgtc tttccacg gcgacctggg  
41101 agacagcaac atctttgta aagatggca agtaatggc tttattgatc tgggagaag  
41161 cggcagggcg gacaagtgg atgacattgc ctctgcctc cggctgatca gggaggat  
41221 cggggaagaa cagtatgct agctatttt tgacttact gggatcaagc ctgattggga  
41281 gaaaataaaa tattatatt tactggatga attgttttag tacctagatt tagatgcta  
41341 aaaagcttta actacaagct ttttagacat ctaatcttt ctgaagtaca tccgcaactg  
41401 tccatactct gatgtttat atcttttcta aaagttcgt agatagagtt ctatattaga  
41461 gatgtaaaga gttttggtga agaggtttgt gagtatggct ttataacca ggtgcaatg  
41521 agaagcacta acagcagcta gcttaagaac gcataggata tactttttat ggaagtaca  
41581 gaggaggaat aaaattgaa caggattaac agagtaacct ctattctat tcagctgcaa  
41641 tcaaaaaaaaa taattctgc caaagaaatt gcacagcgt ttaatataag cttaggaca  
41701 gtttacagag atatccggac actgaagaa gccggaatac caattggatc tgaggccgga  
41761 aaaggatatt ttctgtaga gggcttcta cttccgccg taatgtttac agcggcggaa  
41821 gtgggtgcat tgattacagc agggaaatt taaattgcc atggagatga atcattata  
41881 aaggattttg atcagctat gtataaaatc aaatctatt tgaagcatgg tgaaaaaac  
41941 tatgcacagg agttggagaa cagtattaac gtgtacagca catctggaca gaaaaataca



42001 ttggcggata acgttattgc agcaattcag actgcaatct gcaataaaag ggtaatatca  
42061 attcaatatc ctgcatcagg agggcaagaa ccggaaagca gaatgataga gcctatatca  
42121 ctggggtttt atgaacagaa ctggactta atcggttttg caggctaaga aatgaatata  
42181 ggaattttcg tgtggatcgg attaaaagca tttgcataga agaagagctc tgtcaaagcc  
42241 atgatggctc tttggaacaa atattaaaac aatgctttc atataaaaaa ctatataatg  
42301 taattcttag agctgaaaaa ggggagacat acaattctat caagaacagg tattctctcg  
42361 gcttccttga agaaaccgat ttgggaagta aatggaaat cgaattccag acagattcct  
42421 ttgagatatt gagcaagcag ctgattgaat atggatcagg cattgaaata gtccaacctg  
42481 atgaattaa atgcataacc cgtaaacc tggcaciaat tacgaatcac tgctaaact  
42541 tgatttagag aaagcgattg gtctgttatg tttttttgt aaggtttcat atcccctgct  
42601 gacatacagc tgtcagtga ttatgatatt ctactatcaa aaaggaggat tgaaaaatat  
42661 gaaaccaaag ataattatgc acacacaaat tagccttgat ggccgcatta aaggctttga  
42721 taatccgaa gtttactacc aggttgccgg gggaattcat tcggatgcgg tgctgttgg  
42781 gtccaatact gttttactg catttgaaaa atatctgct gaaacagagg ctgattttga  
42841 gaaaatcata acaagcccgg aggaccccag accaatagga gtcatactg acagcagagg  
42901 tatcttgaga agtcttcatt gcttaagaaa tcttgatat ctgaaggaaa ttgtcattct  
42961 ggtatcaact gccactccga aggaatattt gaattattg gaggaaaggc attaccata  
43021 tattgtgca ggaatgatc atgtggacta tgaaaaagcc ttcagatcc tgcagagca  
43081 atatgggtgt aaatacatgc ggacagacag tggcgggtgga ttaaccaaca aattattaga  
43141 aaacggactt attgatgaaa tcagtcttgt gatcacca tgtttgtag gtaataaaga  
43201 aaaacaacta tttgataacc ttctgttatc tgaaaaagtt aatttggaa tgcagggac  
43261 agagaatgca gaacatggct gtctgtcatt gcgctatgct gtgaaaaata aggattagt  
43321 cagcatactt taaaaagtgt ctgttgggac agtgcctaa aggaagcata agctcatggc  
43381 tagcggcggg gttaaagtaa cggcactcgg cccaatata tagttgatat gccctaagc  
43441 ctttgagggc aaggcggta accgcgctt ttccgggtccg catacagtcg tcaatgagg  
43501 gtatcaagct cggcaatgcg cgggtgcttc tcgggtggtc gtttcttcgc cgccgtttc  
43561 ggctaattct aattgatccg aactgtaagg ataagcaatt atccggggct agttaagtat  
43621 cttagagagg aagataaaga taagtaaacc aattttaaag ttgtaccgaa taaagcctt  
43681 aagaggacaa catgcttttg aaggctttat tgcttacaat tacttggatt gtaacgcaa  
43741 agcaggcacc aatcaatga aaaatagcct atccaggcga ctgtttcaga aatattggct  
43801 tccccaagg ggataccagt ggggtgcgac atctttttg cccactcaag gcacgttgag  
43861 tgtgtgtct tgatgtcag ggtggagaaa tatgactaaa caaataactg ataaataag  
43921 ggttctctga cattgaactt ttccatcgc tactttgccc aggatgtaa tgcgggaaa  
43981 cccttattt ttttttaga ggaaatata caactctct taaagtata gggttgagtt  
44041 gatagattag ataactctg ggggttgtgg agatataat gctaagataa taatgtacag  
44101 agttgcta atgtctatgt ataataaag gtaaaattta gcacagtatt aatggtgatt  
44161 aatattgatt atagataaa cattaatact gaaatattt taagatcagt aaaagattta  
44221 aataagctaa aacttttagt cgaggtaat aattgggata gacctaatt tagtgccata  
44281 gctagagaat taggagtgga tagaagaaca gtaaaaagt attatgatgg agatataaag  
44341 aaagttagaa aatctaaaa atcaagata gatgatttct atgatcatc ttcgagttg  
44401 ctttcagcag aaacggacca aatattttat tataaatctc atctctatag atatttggt  
44461 agagaaaaag gattagattg ttcaagaagt aattttaatt attatattt aaaacatgaa  
44521 aaatttgcag aatactttaa accaaacaaa aagaaagatg ctgtaaaatc tgaacttcc  
44581 ttggaaaac aagcacaatt tgattggaaa gaaaaattaa aattttctt taaaagcgga

44641 gaagagtta tcttaatgt tggcagttg atattatcag catctaggtt caaatattgg  
44701 gcaattgtc catcaacatc tcaagcatat ttatttgatt tcttaactaa tgttttgaa  
44761 gcattaggag gtgtgccaa agaaatagtt atagataatg cttcaacaat gatggataaa  
44821 gctagaacgg aacgttctga cggtaaagtt aatcctaat ttcagcagtt tgctgatgac  
44881 tttgattta atatcgtacc ttgcattaga gcaaggccaa atactaaagc aaaagttgaa  
44941 aatccaatgc gagttattga tgaataatg acttataatg gattgcttaa taatgaggaa  
45001 gagttattcg agaagatgca agaaataaca aatgaagcta attcaagagt ctgtcaggca  
45061 ataggattc ctctatatt agtatttaa aaagagaaag aacatcttt accactacca  
45121 aatgataaaa tatgttcta ttacaaaaat acaacaatac atgcgaaagt caattccaat  
45181 ggactattc gctataaggg aaatctatat tctgtccccg ttgattttat taataaaaat  
45241 attgttgta aagttattga taataaccta tatgtttatt atgaccataa attaataact  
45301 ttacatacag tttctaataa aaaaattaat tatcatgaaa atcatcactt agcaatgatg  
45361 agcttaactt ttgaaactc ggataaagaa gatgttaaaa actatgcagc taaacattta  
45421 gaggagatga aaaagttta tgaacaatta tcaacagtta cagaagaact tacatgaact  
45481 taaattaaca caaatcagcc tacaataga tgactatatt aataaataa atgaccataa  
45541 actaagcatt gtagacgctt tgtgtgagtt aactagtaa gaggttgaag ttaaaaattt  
45601 taatgctgcg cacgctatgg ttaaagtagc agcattcccc cacctgaaag aattgaagga  
45661 ctttgattt gagtttcaac ctaaaataa caaacaaca ttttagatt tcgaaagctt  
45721 acgttttta gataataata gcaatattat attgataggc aatagtggcg tgggtaagac  
45781 ccacctgcc acgtcaatt gaattgctgc agcaaagaaa agagtaagta cctattttat  
45841 aaaatgcaa gatttgatag agcaattaa aaaagcttat atgaaaaca aacttgatga  
45901 tagaataaaa catttagta aatacaagct tctataatt gatgaaattg gatattggc  
45961 aattggagaa caagaagaa aatgttttt tcaactata gatagacgtt atgaaaagaa  
46021 aagcacaata gtactagta atattaatct atccgactgg aatcaaatat ttttagacia  
46081 tatgctagct agtctattt tagacagact tttgatcat tctactattg taaatattct  
46141 cggaaactct tacaggacgg ctactgcatt atccaaaata tgggttagt ataaagtagt  
46201 ggacacatta aatcgaacta agtaaaataa tatttagtta agaaaggatg tgtccattat  
46261 gggaaagggc agaagatacg atcaagaata taaagatatg atagtagaat tatttaagtc  
46321 aggaatgagc ttagcagagc taagtagcga atatggcatt gcaaatcaa caattaacgg  
46381 ctgggttaa gatgtaaaag aatataaagt agatgaaat gaagttaga cattaagga  
46441 agttaaggct ttaaaaaag aatggcaag aattaaagag gaaatgaaa tattacacca  
46501 aaggcgggct ttagccaaa aagctatggc catatttgca acaagaaatt agatgaatta  
46561 atagaattta taaatagcaa taaaacaaa catgatatta agactatatg taccgttcta  
46621 ggcgtagcca gaagcacata ttataaattt ttgataaaa ctaaactgc aagagaatta  
46681 gaaatgagg aattaaatc agctattaa aggatatata aagagaataa aggcatatat  
46741 ggtgctccta ggattcatca tatacttggg atagaaggat tcaatgtatc attgaagcga  
46801 gttcaaagac gaatgactga acttggcctt tgtgcagtaa ctgtaaaaaa atacaaact  
46861 cattcaagta aaaaggtagc agaagattta gaagacgttt tgaagagaga tttactact  
46921 acttctatta acgaaaaatg ggtaggatg attacatata tttactat caaagatgg  
46981 tggctctatt tagcttagt tctagactta tatttaaaa aataattgg ctacgcttc  
47041 gatcagagaa tgactaatga tttagttgtt aaagccttaa aaaatgctta ttacagccaa  
47101 tttccgata agaataagca attaatatt catagcgatt taggctctca atactagc  
47161 aatgatttaa gggagctatg caaagagttt aatattatac aatcgtttag taaaaaggt  
47221 tgtccatag ataatgctg tatagaatct ttcattcat taataaaaaa ggaagaata

47281 tatagaaata cataccgtac cttcgaagaa gctaatatgg ctatntttaa atatattgaa  
47341 ggttggtata acagaaaaag gctacactct tctattaatt acatgacttc agatcaatgt  
47401 gaattattag ctagaagtgc agcataaaaa agtttgactt tttgtgtcca aatattgac  
47461 ataagaccaa ggtaccata cagaggattc tgatatagat atcggattt attacaatca  
47521 agaatcattt gacctgacag cgattaacca aattgctaca gagttggatg atgagaatg  
47581 aaacaacctt gttgtacctc ccggagcgtg ggggtgattg atcaatggcg gcggatggtt  
47641 agttatgaac gggatcatg ttgatctgat tttacgtgat ataaaacggg tggaacaaat  
47701 aatcaaagat acggagcaag gaattgttac tgcaaattat cagaccgggc atccccatgg  
47761 ttatataagt gctatgtatc gtggagaatt ggctatcagc aagatacaat atgctaaaa  
47821 tgaaagctta tgcaattaa aaaatcaggc ggaaatttac cctggtgctc taaagaagag  
47881 cttgataaac tttttttat ttgaagcaga gttctctta atgtttgtaa aagcaaatgc  
47941 gggagcagag gataaatatt atattgcagg ccatgtttt cgtattatt catgcttaa  
48001 tcaagtacta tttgatgta ataattgcta ttgcattaac gaaaagaaag ctataaaact  
48061 gcttgaact tttgaatata aacctaaaaa atatgccgaa agggtaaact atattttga  
48121 agtactcggg ctttacttt ttgaatgcta cgatatgacc gagaagcttt ataaagaagt  
48181 gaaaaaaatt gcaacggaga taaataactt tttaaacgag ggggaattca gatgaaagaa  
48241 aacaaatag atgataat atttttcaa aaatacagtc aatgagtcg ctacagcag  
48301 ggactagccg gtgcaggaga atgggaaaca ttgagaaagc tgctgccgga ttttaaagat  
48361 aagcgtgtgc ttgatttagg atgcggctat ggatggcact gtatttatgc gatggaacac  
48421 ggagcgtctt ctgtgtagg tttgatatt ttcataaaa tgctcgaggt agccaaagaa  
48481 aaaacacatt ttccacaggt tgaatataaa tgctgtgcta tagaagatgt ggaattccca  
48541 gaggagagtt ttgatgtaat attaagttca cttgcgttc actatgtagc agattatgag  
48601 attttagtaa aaaagatata tagaactctg aagtctggg gtaagctagt tttacggtt  
48661 gaacatcctg ttttactgc ctatggaaca caagactggc attataacga aaaaggagaa  
48721 atactgcatt ttccggtgga taattattat tatgagggca aacggacagc tgtgttttg  
48781 ggagaaaagg ttacaaaata tcatagaaca ctgaccacat atctaaatac actgctttca  
48841 aatggtttta taataaatca tattgtggag ccgagccgc cgaaaacat gatggatatt  
48901 ccggggatgc aggatgaaat ggcctgcc atgatgctga ttgatcggc gaacaaaaaa  
48961 gtggatagat agaactaaa cacctataag gtataaatgg aggtaattta tgttaaaga  
49021 aaaaattatt atagagatga aagaagtatt caaagaaatt cttttggca tagagcatac  
49081 tctcaaagtt ttgaaaatg cagaagatat aatgaaagga gaaaatcgc gagaggaaga  
49141 aaaagaattc atcagtatta ttgctatac acatgatatt ggtgctgtt aagcaaaaa  
49201 aaaatacggg tctattgatg gtgtctatca agaaaaggaa ggaccagaag tagcgaaga  
49261 aatattaaaa aaggtaggct ataacaaaaa tattgataga atatgctta taataggcaa  
49321 ccatcact ccatctaaa ttgatggact tgattttcaa atacaatggg aagctgatt  
49381 gcttgaat ttaacgatta tggataaaga aaaagaacag gaaaagataa aaaagtgtat  
49441 agatgaaaac tttaaaca acacaggaaa aaggatagct t

//

DEFINITION Plasmid PLASMID\_1

fasta\_record 1..4724

/locus\_tag="B77|SC|contig000002"

/label=B77|SC|contig000002

/note="B77|SC|contig000002"

/colour=5

CDS 10..1062

/color="4locus\_tag=B77\_03324note=Relaxase/Mobilisation+nuclease+domain,+protein+motif:  
Pfam:PF03432.8product=Relaxase/Mobilisation+nuclease+domain+[relaxase]'ID=B77\_03324pr  
otein\_id=gnl|SC|B77\_03324"

/codon\_start=1

CDS 351..548

/locus\_tag="B77\_ORF80"

/color=8

/note="Type+II+CRISPR-associated+endonuclease+Cas1"

/product="Type+II+CRISPR-associated+endonuclease+Cas1+[endonuclease]"

/codon\_start=1

CDS 653..1318

/locus\_tag="B77\_ORF42"

/color=1

/note="Cpp3+protein"

/product="Cpp3+protein"

/codon\_start=1

CDS 1362..1595

/color=8locus\_tag=B77\_03325note=Sodium+ion-  
translocating+oxaloacetate+decarboxylase+beta+subunit+membrane+protein,+Cdd:COG1883+  
protein+motif:TIGRFAMs:TIGR01109+protein+motif:Pfam:PF03977.7product=Sodium+ion-  
translocating+oxaloacetate+decarboxylase+beta+subunit++membrane+protein+[transporter]'I  
D=B77\_03325protein\_id=gnl|SC|B77\_03325'

/codon\_start=1

CDS 1653..1796

/locus\_tag="B77\_03326"

/color=1

/locus\_tag="B77\_03326"

/note="hypothetical+protein"

/product="hypothetical+protein"

/protein\_id="gnl|SC|B77\_03326"

/codon\_start=1

CDS 2025..3374

/locus\_tag="B77\_03327"

/color=10

/locus\_tag="B77\_03327"

/note="Replication+initiation+protein+RepA"

/product="Replication+initiation+protein+RepA+[replication]"

/protein\_id="gnl|SC|B77\_03327"

/codon\_start=1

CDS complement(3532..3636)

/locus\_tag="B77\_ORF194"

/color=8

/note="Molybdenum+cofactor+biosynthesis+protein+MoaD"  
 /product="Molybdenum+cofactor+biosynthesis+protein+MoaD"  
 /gene="moaD"  
 /codon\_start=1  
 CDS 3800..4195  
 /locus\_tag="B77\_ORF67"  
 /color=9  
 /note="Transposon+protein+TnpV"  
 /product="Transposon+protein+TnpV"  
 /codon\_start=1  
 CDS complement(3851..3976)  
 /locus\_tag="B77\_ORF147"  
 /color=9  
 /note="Transposon+protein+TnpV"  
 /product="Transposon+protein+TnpV"  
 /codon\_start=1  
 CDS 4396..4716

/color=4locus\_tag=B77\_03329note=Plasmid+mobilisation+relaxosome+protein+MobC,+protein  
 +motif:Pfam:PF05713.5product=Plasmid+mobilisation+relaxosome+protein+MobC+[relaxosome]  
 e]'ID=B77\_03329gene=mobC'protein\_id=gnl|SC|B77\_03329

/codon\_start=1  
 CDS 4638..4724  
 /locus\_tag="B77\_ORF107"  
 /color=4  
 /note="Relaxase/mobilization+nuclease+domain-containing+protein"  
 /product="Relaxase/mobilization+nuclease+domain-  
 containing+protein+%28partial%29+[relaxase]"  
 /codon\_start=1

BASE COUNT 1500 a 823 c 1340 g 1061 t

ORIGIN

1 atagattatg tgacaaaaaa agaaaagaca gaggagaagc ttgtcagcgg tctgcattgt  
 61 gagccggaga cgggtcaagga agaaatgcaa gccacaaagg agctgtgggg caagacggat  
 121 ggaagaacct ataagcatta tgtgcaatcc taccatgagg acgaggaaat aacccggag  
 181 caggctcaca agaacgctgt cgagctggca gagcatacaa aggcattgaa agggcatgaa  
 241 gttctgatag ccacgcatat agacaagggg catatacaca cgcattttat tgtcaattcc  
 301 gtaaattatg aggacggtca taagctcaa tggagtaagc acgaccttaa agacctaaag  
 361 gaacggtgca acgagcagag ccgggaacag ggcttgcattg tggcggagaa aggaaagacc  
 421 tttgctggag aagtccggga agaaacggtg gcatggagca aagacaccta ccagctttg  
 481 aacagggcag agcagggaaa ggtcaaaagc tatgtgcagg atattgcctt tgcggtgctg  
 541 gactgtaagg aaacagcgac cagccgggaa aactttatcc ggatgatgaa tgaagagggg  
 601 tacggcgtag actggcagga cagccacaag tacatcacat ataccgactt agccagggaa  
 661 caggcaggag aaaaggcttg taaatcagg gataacaagc tggaaaaata ctacaatatg  
 721 gattttggaa aggagagtat ggagcatgag tttgagagaa atgcacgaac agcagaagca

781 gagcagtcca agagagcagc ttcaagagtt aaaccgacag agccggacag agctggaaaa  
841 cagtctgctc aaagaagcgt tggc gatgtc gagcgagaac tgcgaggaat tgatgaagca  
901 gtcaaatcaa gaacaagtaa gggcagagca gaacaggcag agagacgcag agcagaacag  
961 gaagctcatc agcgagctga agcagagcgt agagctgctg aagaacagca acgaattgct  
1021 tcaagacgct atatcgggcg agattgggag cctgaaagat gaggttaagg aaaacaccgt  
1081 ccaagaggtt agaaaggcgt tacaggcgaa tatagaggct atacagaggg ctacaaagct  
1141 tcttgagaag cagtctgata cacttacaag cgtgatgaag cagaagatcc gggagctgga  
1201 ggaaagcaag aacagctttt tcagatatga gggcttaaag ctgtacctgt ttggggcgg  
1261 tatggtctgt aatattttag tgttcttat gctgttatat ggtatgcttg gtaagtaaaa  
1321 agaaatcgac aatcggaag gttgagaaag gagattagtc aatgaaaaaa atattagga  
1381 tcgttgctgg tattgttga ataatatctg ttattgtggg tgttcattg aagatgaata  
1441 ataatgctat tgctataatc ggaggtgcag atggtcctac ctcggtattt gtcgcaggaa  
1501 agttgaatag tgttctgtc agcatcttc ttattgcgat aggtgtgtg atgtgatag  
1561 tagcgataat tttttattg aagagaaaaa ggtaaaataa ttagtgata agataagcgg  
1621 tcaaggcag agggagtga ggtaaaaga ctatggagaa agaaaaaga gagcaggaga  
1681 gctgcacaag ctgcgcttat aggaaagatt ggtattgtcc cgttgccgga gaccgtgtaa  
1741 agagagaggg gactgttct gaatacgaga aaagtगत atgcgaaggaa aagtagcagt  
1801 gctataatgg cagggaagg gagagaaac cagccctttt ttaagaggtc aaaaatgtc  
1861 aataaactgt attgataata taagcccct ataggtgttt ttgggggtgg ggaaaggag  
1921 agaaaaccag cccttttta agaggtcaaa aatgtgcaat aaactgtatt gataataa  
1981 gcccctata ggtgttttg aggggagaaa aaggtgtgga gaatatggca aaaaaccga  
2041 ctgaaaagca gttgtataag ctgaaaatg aatggctggg gcagttcttt gaggaagta  
2101 agccgaaaga gtttatcgg gctgttttc cagagggag tttgagaga aaggggcatt  
2161 ttgaggacgg aaaggcaaat ggcaataa ccatagttga gaatgataag gcgaagaatc  
2221 ggattgtatt tgatgattg tcggtcattg atgaggtcaa gggggcagag tttgctgca  
2281 tgtcccctgt ggcgtattcc ggcagaaatc ggacggcagc caatgcaagg tggctgatg  
2341 ggatagcgt agacctgac ggggtggaga tgcgcagct ccgtgatgtg ttccatcaa  
2401 tgaacatga tattatcccg aatgcactt actgtattaa cagcggtcac gggctgcatt  
2461 tatattatct gctggaaaag cgggtccct tgtataagca ttgcaggat aagcttcgag  
2521 agttcaagta tgagctgatt gcgaaagtct ggaaccgtta tacaagcact tcacagaac  
2581 gggaacaggt tcagtatcag gggattttc agggcttccg tatggttga acgcagtcaa  
2641 agctgggaaa gagatacccg gtaaaggctt ttgaaacggg cgagagagtg acgattgagt  
2701 atttgaacgg gtatcttatg gataagagca aggcggtcac ggattttcac tataagagcg  
2761 atttgagtct tgccgaagcc cggaagaagt acccggaatg gtatgaaaag cgaattgtc  
2821 agggggagcg ccgtgagcgc tggcatgca aaagggactt atatgattgg tggctgcgga  
2881 aaataaaaga gggggcttct gtagggcaca gatacagctg cttttgcgtt ttggctcct  
2941 atgccgttaa gtgcgatatt ccggaagatg agctttttac agacgctttt tccctattgc  
3001 agttccttga tgatgtgca gatgatgagc ataaccgctt taccaagcgt gatatactgg  
3061 acgcatgca gttttatcaa gagaattatg tcacatacag tcgcaggga gccgaaagag  
3121 tatcggctat tgctatgcca gcaagcaaac ggaacggaag aaaacaggct gaacatttag  
3181 agcgtgcaag gttgtacaa acattggatt atccaatgg agcatggaga aataaagagg  
3241 gtagaccaa aggcagcggg gaaaagtcca agattgtcga agaattgaaa cagcagcatc  
3301 cggacggaag gaagatagat tgtgagagag aaactgggct tagccggcat actgtattga  
3361 agtgggtgga gtaggtata cttgaaatgc cgaaaggcat atgctataat accagtaggc

3421 gaaaatgaca gaagtgtca tgtggcacag caaaaagccc cggaggttgc gactccgggg  
3481 cttttctatt cgttctggg tgggtggctt aatccaagg ctggctacca gttattctc  
3541 tccgtccaac catttgaga tgtagtaggc aactacactt gccaaaacag agagaaaaaa  
3601 tgacagaagt tactcatgc ggttcacccc ttttcttac ctgtctgggg gcggtagcgt  
3661 cgttcattat atcacagggg cagaaatgcc acaagaagcc atttcccctt gtttattatc  
3721 aaagccataa ggaaaagagt gtcaagggcg gtcatagacc gcagcgttta cccttgatac  
3781 tctttttgtg tggctataat gccggagggg aaaacggctg tccgtccgtt tcgttacttc  
3841 ccctgtgct tattgtccg ttccggcgga agaaagtaaa ggggtgtctg cgaccatttt  
3901 ttatctgctg tactcgctga tcggcaagcc gaagctcata ctgcagataa aaaacaagcc  
3961 cttgactgct tcctctctac actttcaaag tcgcccaaga ggaagtaagc tccactatat  
4021 tcttggcaga atatacgcac gaatatatcc gcttgatata ggggtgtctat catgctataa  
4081 tatgtgtagc ggatatattg caagttccct aaagtgttac cactttagaa cttgtgaggg  
4141 tggcaagccc ccttcaatc cccctttta acgagccgga aggtcataa tatgacggtg  
4201 gtagcaccga agaaagagag gtcaaaggca tgaaaaaaga tatggataaa attcagtttg  
4261 agtacagata cgaggtgcag gagctgatga aagtaattga taaatatgta aacagaatc  
4321 cggcagaaaa ggaaaataag acgctggagc gtttcttga cctacttgat gtcattggata  
4381 tggagtggta aggttatgaa caagacaaga ccaaagcagc tatcattccg ggtaagtga  
4441 gaagaatacc agcagctaca ggagaagatt tcagagagtg gaaagaacca gcaggaatat  
4501 atcctttct gtgtgctgga gaagcaaatc gtgaatacgg acggtatcaa ggaacttatc  
4561 ccggaactga aacggatagg gaacaacctc aaccagatag caaagcggtg taatgagggg  
4621 ggaatgttgc cgagtgaagc ggaagtgcgg aagcatggag aggagctgaa caaagtatgg  
4681 cagtcattaa ggcggtatct tcaaaggcgg gcatagggca cgcc

//

DEFINITION Plasmid PLASMID\_2

fasta\_record 1..70011

/ID=F51|SC|contig000002

/label=F51|SC|contig000002

/note="F51|SC|contig000002"

/colour=5

CDS 773..979

/color=7

/locus\_tag="F51\_03060"

/note="Helix-turn-helix domain-containing protein, protein  
motif:CLUSTERS:PRK09943 protein motif:Pfam:PF12844.1"

/product="Helix-turn-helix domain-containing protein  
[transcriptional regulator]"

/"ID=F51\_03060

/protein\_id="gnl|SC|F51\_03060""

/codon\_start=1

CDS 1076..1450

/ID=F51\_03061

/color=7

/locus\_tag="F51\_03061"

/note="Helix-turn-helix domain-containing protein"

/product="Helix-turn-helix domain-containing protein  
 [transcriptional regulator]"  
 /protein\_id="gnl|SC|F51\_03061"  
 /codon\_start=1  
 CDS 1512..2615  
 /color=1  
 /locus\_tag="F51\_03062"  
 /note="CAP domain-containing protein Cysteine-rich  
 secretory protein family, protein motif: Pfam:PF00188.20"  
 /product="CAP domain-containing protein Cysteine-rich  
 secretory protein family"  
 /"ID=F51\_03062  
 /protein\_id="gnl|SC|F51\_03062""  
 /codon\_start=1  
 CDS 2685..3059  
 /color=8  
 /locus\_tag="F51\_03063"  
 /note="type II toxin-antitoxin system PemK/MazF family  
 toxin, similar to AA sequence: UniProtKB:Q7A4G9 protein  
 motif: Pfam:PF02452.11"  
 /product="type II toxin-antitoxin system PemK/MazF family  
 toxin MazF [toxin-antitoxin]"  
 /"ID=F51\_03063  
 /gene="mazF""  
 /protein\_id="gnl|SC|F51\_03063"  
 /codon\_start=1  
 CDS 3199..6762  
 /color=8  
 /locus\_tag="F51\_03064"  
 /note="Uncharacterised surface anchored protein, similar  
 to AA sequence: UniProtKB:P18481 protein motif: Cdd:COG4932  
 protein motif: Pfam:PF05738.7"  
 /product="Uncharacterised surface anchored protein"  
 /"ID=F51\_03064  
 /protein\_id="gnl|SC|F51\_03064""  
 /codon\_start=1  
 CDS 6833..6961  
 /ID=F51\_03065  
 /color=1  
 /locus\_tag="F51\_03065"  
 /note="hypothetical protein"  
 /product="hypothetical protein"  
 /protein\_id="gnl|SC|F51\_03065"  
 /codon\_start=1



CDS        6977..7234  
           /ID=F51\_03066  
           /color=1  
           /locus\_tag="F51\_03066"  
           /note="hypothetical protein"  
           /product="hypothetical protein"  
           /protein\_id="gnl|SC|F51\_03066"  
           /codon\_start=1

CDS        7237..7623  
           /ID=F51\_03067  
           /color=1  
           /locus\_tag="F51\_03067"  
           /note="hypothetical protein"  
           /product="hypothetical protein"  
           /protein\_id="gnl|SC|F51\_03067"  
           /codon\_start=1

CDS        7625..8269  
           /color=8  
           /locus\_tag="F51\_03068"  
           /note="Class D Sortase cysteine transpepidase , protein  
           motif:Cdd:COG3764 protein motif:TIGRFAMs:TIGR01076 protein  
           motif:Pfam:PF04203.7"  
           /product="Class D Sortase cysteine transpepidase  
           [transpepidase]"  
           /"ID=F51\_03068  
           /protein\_id="gnl|SC|F51\_03068""  
           /codon\_start=1

CDS        8280..8582  
           /ID=F51\_03069  
           /color=1  
           /locus\_tag="F51\_03069"  
           /note="hypothetical protein"  
           /product="hypothetical protein"  
           /protein\_id="gnl|SC|F51\_03069"  
           /codon\_start=1

CDS        8586..8804  
           /ID=F51\_03070  
           /color=1  
           /locus\_tag="F51\_03070"  
           /note="DUF4236 domain-containing protein"  
           /product="DUF4236 domain-containing protein"  
           /protein\_id="gnl|SC|F51\_03070"  
           /codon\_start=1

CDS        8868..9632

/color=8  
 /locus\_tag="F51\_03071"  
 /eC\_number=2.1.1.72  
 /note="Modification methylase DpnIIA DNA adenine  
 methylase, similar to AA sequence:UniProtKB:P04043 protein  
 motif:CLUSTERS:PRK10904 protein motif:Cdd:COG0338 protein  
 motif:TIGRFAMs:TIGR00571 protein motif:Pfam:PF02086.9"  
 /product="Modification methylase DpnIIA DNA adenine  
 methylase [methyltransferase]"  
 /"ID=F51\_03071  
 /gene="dpmM""  
 /protein\_id="gnl|SC|F51\_03071"  
 /codon\_start=1  
 CDS 9659..9943  
 /ID=F51\_03072  
 /color=1  
 /locus\_tag="F51\_03072"  
 /note="hypothetical protein"  
 /product="hypothetical protein"  
 /protein\_id="gnl|SC|F51\_03072"  
 /codon\_start=1  
 CDS 9944..10255  
 /ID=F51\_03073  
 /color=4  
 /locus\_tag="F51\_03073"  
 /note="TcpK chain A:2.60"  
 /product="TcpK chain A"  
 /protein\_id="gnl|SC|F51\_03073"  
 /gene="tcpK"  
 /codon\_start=1  
 CDS 10631..11431  
 /color=9  
 /locus\_tag="F51\_03074"  
 /note="Tyrosine recombinase, protein motif:Cdd:COG4974  
 protein motif:TIGRFAMs:TIGR02249 protein  
 motif:Pfam:PF00589.16"  
 /product="Tyrosine recombinase [recombinase]"  
 /"ID=F51\_03074  
 /protein\_id="gnl|SC|F51\_03074""  
 /codon\_start=1  
 CDS 11493..13082  
 /color=4  
 /locus\_tag="F51\_03075"  
 /note="DNA translocase FtsK DNA segregation ATPase

FtsK/SpoIIIE and related proteins , similar to AA  
 sequence:UniProtKB:P64165 protein motif:CLUSTERS:PRK10263  
 protein motif:Cdd:COG1674 protein motif:TIGRFAMs:TIGR03928  
 protein motif:Pfam:PF01580.12"  
 /product="DNA translocase FtsK DNA segregation ATPase  
 FtsK/SpoIIIE and related proteins [ATPase coupling  
 protein]"  
 /"ID=F51\_03075  
 /gene="ftsK""  
 /protein\_id="gnl|SC|F51\_03075"  
 /codon\_start=1  
 CDS 13096..13266  
 /ID=F51\_03076  
 /color=1  
 /locus\_tag="F51\_03076"  
 /note="hypothetical protein"  
 /product="hypothetical protein"  
 /protein\_id="gnl|SC|F51\_03076"  
 /codon\_start=1  
 CDS 13259..14338  
 /color=4  
 /locus\_tag="F51\_03077"  
 /note="Conjugative transposon protein TcpC, protein  
 motif:Pfam:PF12642.1"  
 /product="Conjugative transposon protein TcpC [mating pair  
 formation]"  
 /"ID=F51\_03077  
 /gene="tcpC""  
 /protein\_id="gnl|SC|F51\_03077"  
 /codon\_start=1  
 CDS 14350..14685  
 /color=4  
 /locus\_tag="F51\_03078"  
 /note="Conjugative transposon protein TcpD, ab initio  
 prediction:Prodigal:2.60"  
 /product="Conjugative transposon protein TcpD [mating pair  
 formation]"  
 /"ID=F51\_03078  
 /gene="tcpD""  
 /protein\_id="gnl|SC|F51\_03078"  
 /codon\_start=1  
 CDS 14697..15065  
 /color=4  
 /locus\_tag="F51\_03079"

/note="Conjugative transposon membrane protein TcpE,  
 protein motif:Pfam:PF12648.1"  
 /product="Conjugative transposon membrane protein TcpE  
 [mating pair formation]"  
 /"ID=F51\_03079  
 /gene="tcpE""  
 /protein\_id="gnl|SC|F51\_03079"  
 /codon\_start=1  
 CDS 15123..15290  
 /ID=F51\_03080  
 /color=1  
 /locus\_tag="F51\_03080"  
 /note="hypothetical protein"  
 /product="hypothetical protein"  
 /protein\_id="gnl|SC|F51\_03080"  
 /codon\_start=1  
 CDS 15341..17863  
 /color=4  
 /locus\_tag="F51\_03081"  
 /note="ATPase conjugation protein TcpF, protein  
 motif:Cdd:COG3451 protein motif:Pfam:PF12846.1"  
 /product="ATPase conjugation protein TcpF [ATPase mating  
 pair formation]"  
 /"ID=F51\_03081  
 /gene="tcpF""  
 /protein\_id="gnl|SC|F51\_03081"  
 /codon\_start=1  
 CDS 17863..18867  
 /color=4  
 /locus\_tag="F51\_03082"  
 /note="Conjugation-related peptidoglycan hydrolase TcpG,  
 similar to AA sequence:UniProtKB:P40767 protein  
 motif:CLUSTERS:PRK05684 protein motif:Cdd:COG3951 protein  
 motif:TIGRFAMs:TIGR02541 protein motif:Pfam:PF01832.14"  
 /product="Conjugation-related peptidoglycan hydrolase TcpG  
 [pepidase]"  
 /"ID=F51\_03082  
 /gene="tcpG""  
 /protein\_id="gnl|SC|F51\_03082"  
 /codon\_start=1  
 CDS 18970..21468  
 /color=4  
 /locus\_tag="F51\_03083"  
 /note="Conjugation pore-forming membrane protein TcpH,

protein motif:Cdd:COG5027"  
 /product="Conjugation pore-forming membrane protein TcpH  
 [mating pair formation]"  
 /"ID=F51\_03083  
 /gene="tcpH""  
 /protein\_id="gnl|SC|F51\_03083"  
 /codon\_start=1  
 CDS 21471..21965  
 /color=4  
 /locus\_tag="F51\_03084"  
 /note="Predicted membrane-bound metal-dependent hydrolase  
 TcpI, similar to AA sequence:UniProtKB:P64481 protein  
 motif:CLUSTERS:PRK11648 protein motif:Pfam:PF04307.8"  
 /product="Predicted membrane-bound metal-dependent  
 hydrolase TcpI [regulator]"  
 /"ID=F51\_03084  
 /gene="tcpI""  
 /protein\_id="gnl|SC|F51\_03084"  
 /codon\_start=1  
 CDS 21974..22732  
 /ID=F51\_03085  
 /color=4  
 /locus\_tag="F51\_03085"  
 /note="Type 4 prepilin-like proteins leader  
 peptide-processing enzyme TcpJ"  
 /product="Type 4 prepilin-like proteins leader  
 peptide-processing enzyme TcpJ  
 [pepidase/methyltransferase]"  
 /gene="tcpJ"  
 /protein\_id="gnl|SC|F51\_03085"  
 /codon\_start=1  
 CDS 23681..23986  
 /ID=F51\_03086  
 /color=1  
 /locus\_tag="F51\_03086"  
 /note="hypothetical protein"  
 /product="hypothetical protein"  
 /protein\_id="gnl|SC|F51\_03086"  
 /codon\_start=1  
 CDS 24001..25020  
 /color=8  
 /locus\_tag="F51\_03087"  
 /eC\_number=2.1.1.37  
 /note="DNA cytosine-5--methyltransferase HhaI, similar to

AA sequence:UniProtKB:P05102 protein  
 motif:CLUSTERS:PRK10458 protein motif:TIGRFAMs:TIGR00675  
 protein motif:Pfam:PF00145.11"  
 /product="DNA %28cytosine-5-%29-methyltransferase Hhal  
 [methyltransferase]"  
 /"ID=F51\_03087  
 /gene="hhaIM""  
 /protein\_id="gnl|SC|F51\_03087"  
 /codon\_start=1  
 CDS 25037..25210  
 /ID=F51\_03088  
 /color=1  
 /locus\_tag="F51\_03088"  
 /note="hypothetical protein"  
 /product="hypothetical protein"  
 /protein\_id="gnl|SC|F51\_03088"  
 /codon\_start=1  
 CDS 25207..26229  
 /ID=F51\_03089  
 /color=1  
 /locus\_tag="F51\_03089"  
 /note="DUF4417 domain-containing protein"  
 /product="DUF4417 domain-containing protein"  
 /protein\_id="gnl|SC|F51\_03089"  
 /codon\_start=1  
 CDS 26324..27730  
 /color=8  
 /locus\_tag="F51\_03090"  
 /note="Putative amidoligase enzyme SWIM zinc finger  
 domain protein, protein motif:Pfam:PF12224.2"  
 /product="Putative amidoligase enzyme SWIM zinc finger  
 domain protein"  
 /"ID=F51\_03090  
 /protein\_id="gnl|SC|F51\_03090""  
 /codon\_start=1  
 CDS 28318..28719  
 /ID=F51\_03091  
 /color=10  
 /locus\_tag="F51\_03091"  
 /note="Putative C-terminal domain of type IA  
 topoisomerase"  
 /product="Putative C-terminal domain of type IA  
 topoisomerase"  
 /protein\_id="gnl|SC|F51\_03091"

CDS        /codon\_start=1  
           28817..29128  
           /ID=F51\_03092  
           /color=1  
           /locus\_tag="F51\_03092"  
           /note="hypothetical protein"  
           /product="hypothetical protein"  
           /protein\_id="gnl|SC|F51\_03092"  
           /codon\_start=1

CDS        complement(29440..29673)  
           /ID=F51\_03093  
           /color=1  
           /locus\_tag="F51\_03093"  
           /note="hypothetical protein"  
           /product="hypothetical protein"  
           /protein\_id="gnl|SC|F51\_03093"  
           /codon\_start=1

CDS        complement(29698..30600)  
           /ID=F51\_03094  
           /color=1  
           /locus\_tag="F51\_03094"  
           /note="hypothetical protein"  
           /product="hypothetical protein"  
           /protein\_id="gnl|SC|F51\_03094"  
           /codon\_start=1

CDS        30730..31137  
           /ID=F51\_03095  
           /color=1  
           /locus\_tag="F51\_03095"  
           /note="hypothetical protein"  
           /product="hypothetical protein"  
           /protein\_id="gnl|SC|F51\_03095"  
           /codon\_start=1

CDS        31201..32058  
           /color=9  
           /locus\_tag="F51\_03096"  
           /note="Rpn family recombination-promoting  
           nuclease/putative transposase, protein  
           motif:TIGRFAMs:TIGR01784 protein motif:Pfam:PF12784.1"  
           /product="Rpn family recombination-promoting  
           nuclease/putative transposase [DDE transosase]"  
           /ID=F51\_03096  
           /protein\_id="gnl|SC|F51\_03096""  
           /codon\_start=1

CDS        32075..32164  
           /ID=F51\_03097  
           /color=1  
           /locus\_tag="F51\_03097"  
           /note="hypothetical protein"  
           /product="hypothetical protein"  
           /protein\_id="gnl|SC|F51\_03097"  
           /codon\_start=1

CDS        32813..34075  
           /color=2  
           /locus\_tag="F51\_03098"  
           /note="Tetracycline efflux MFS transporter TetA , protein  
           motif:CLUSTERS:PRK11646 protein motif:Cdd:COG2814 protein  
           motif:Pfam:PF07690.10"  
           /product="Tetracycline efflux MFS transporter TetA%28P%29  
           [antibiotic resistance]"  
           /ID=F51\_03098  
           /protein\_id="gnl|SC|F51\_03098""  
           /gene="tetA"  
           /codon\_start=1

CDS        34059..36017  
           /color=2  
           /locus\_tag="F51\_03099"  
           /note="Tetracycline resistance protein tetM from  
           transposon Tn916, similar to AA sequence:UniProtKB:P21598  
           protein motif:CLUSTERS:PRK13351 protein motif:Cdd:COG0050  
           protein motif:TIGRFAMs:TIGR00484 protein  
           motif:Pfam:PF00009.21"  
           /product="Tetracycline resistance protein tetM from  
           transposon Tn916 [antibiotic resistance]"  
           /ID=F51\_03099  
           /gene="tetM""  
           /protein\_id="gnl|SC|F51\_03099"  
           /codon\_start=1

CDS        36209..36487  
           /ID=F51\_03100  
           /color=1  
           /locus\_tag="F51\_03100"  
           /note="YcxB family protein"  
           /product="YcxB family protein"  
           /protein\_id="gnl|SC|F51\_03100"  
           /codon\_start=1

CDS        36938..37807  
           /color=7



```

/locus_tag="F51_03101"
/note="AraC family transcriptional regulator
Helix-turn-helix domain-containing protein, similar to AA
sequence:UniProtKB:P28816 protein motif:CLUSTERS:PRK10219
protein motif:Cdd:COG3449 protein motif:TIGRFAMs:TIGR04094
protein motif:Pfam:PF12833.1"
/product="AraC family transcriptional regulator
Helix-turn-helix domain-containing protein [transcriptional
regulator]"
/"ID=F51_03101
/protein_id="gnl|SC|F51_03101""
/codon_start=1
CDS    38355..38507
/ID=F51_03102
/color=8
/locus_tag="F51_03102"
/note="Cytochrome c551 product=Cytochrome c551 [eletron
transfer]"
/protein_id="gnl|SC|F51_03102"
/codon_start=1
CDS    39587..40321
/color=9
/locus_tag="F51_03103"
/note="Serine recombinase, similar to AA
sequence:UniProtKB:P20384 protein motif:CLUSTERS:PRK13413
protein motif:Pfam:PF00239.15"
/product="Serine recombinase [recombinase]"
/"ID=F51_03103
/protein_id="gnl|SC|F51_03103""
/codon_start=1
CDS    40342..40449
/ID=F51_03104
/color=8
/locus_tag="F51_03104"
/note="Signal pepidase"
/product="Signal pepidase"
/protein_id="gnl|SC|F51_03104"
/codon_start=1
CDS    complement(40579..40758)
/ID=F51_03105
/color=1
/locus_tag="F51_03105"
/note="hypothetical protein"
/product="hypothetical protein"

```

/protein\_id="gnl|SC|F51\_03105"  
 /codon\_start=1  
 CDS 40950..41747  
 /ID=F51\_03106  
 /color=8  
 /locus\_tag="F51\_03106"  
 /note="Beta2 toxin"  
 /product="Beta2 toxin [virulence]"  
 /protein\_id="gnl|SC|F51\_03106"  
 /codon\_start=1  
 CDS complement(41758..42399)  
 /ID=F51\_03107  
 /color=1  
 /locus\_tag="F51\_03107"  
 /note="hypothetical protein"  
 /product="hypothetical protein"  
 /protein\_id="gnl|SC|F51\_03107"  
 /codon\_start=1  
 CDS complement(42403..42726)  
 /color=7  
 /locus\_tag="F51\_03108"  
 /note="PadR family transcriptional regulator, protein  
 motif:CLUSTERS:PRK09416 protein motif:TIGRFAMs:TIGR03433  
 protein motif:Pfam:PF03551.8"  
 /product="PadR family transcriptional regulator  
 [transcriptional regulator]"  
 /ID=F51\_03108  
 /protein\_id="gnl|SC|F51\_03108""  
 /codon\_start=1  
 CDS 42949..43419  
 /ID=F51\_03109  
 /color=1  
 /locus\_tag="F51\_03109"  
 /note="hypothetical protein"  
 /product="hypothetical protein"  
 /protein\_id="gnl|SC|F51\_03109"  
 /codon\_start=1  
 CDS 43486..44016  
 /color=7  
 /locus\_tag="F51\_03110"  
 /eC\_number=3.4.21.88  
 /note="LexA repressor SOS-response repressor and protease  
 LexA , similar to AA sequence:UniProtKB:P31080 protein  
 motif:CLUSTERS:PRK00215 protein motif:TIGRFAMs:TIGR00498"

protein motif:Pfam:PF01726.10"  
 /product="LexA repressor SOS-response repressor and  
 protease LexA [transcriptional regulator]"  
 /"ID=F51\_03110  
 /gene="lexA""  
 /protein\_id="gnl|SC|F51\_03110"  
 /codon\_start=1  
 CDS 44302..44529  
 /ID=F51\_03111  
 /color=1  
 /locus\_tag="F51\_03111"  
 /note="hypothetical protein"  
 /product="hypothetical protein"  
 /protein\_id="gnl|SC|F51\_03111"  
 /codon\_start=1  
 CDS 44595..45089  
 /ID=F51\_03112  
 /color=7  
 /locus\_tag="F51\_03112"  
 /note="DNA-binding protein Helix-turn-helix  
 domain-containing protein"  
 /product="DNA-binding protein Helix-turn-helix  
 domain-containing protein [transcriptional regulator]"  
 /protein\_id="gnl|SC|F51\_03112"  
 /codon\_start=1  
 CDS 45220..45309  
 /ID=F51\_03113  
 /color=9  
 /locus\_tag="F51\_03113"  
 /note="IS256-like element ISCpe3 family transposase"  
 /product="IS256-like element ISCpe3 family transposase  
 [DDE recombinase]"  
 /protein\_id="gnl|SC|F51\_03113"  
 /codon\_start=1  
 CDS 45473..45769  
 /color=8  
 /locus\_tag="F51\_03114"  
 /note="Histidinol-phosphatase PHP domain-containing  
 protein, protein motif:CLUSTERS:PRK07328 protein  
 motif:Cdd:COG1387 protein motif:TIGRFAMs:TIGR01856"  
 /product="Histidinol-phosphatase PHP domain-containing  
 protein [phosphatase]"  
 /"ID=F51\_03114  
 /protein\_id="gnl|SC|F51\_03114""

CDS        /codon\_start=1  
             45899..46255  
             /color=10  
             /locus\_tag="F51\_03115"  
             /note="Replication initiation protein RepA, protein  
             motif:CLUSTERS:PRK07328 protein motif:Cdd:COG1387 protein  
             motif:TIGRFAMs:TIGR01856"  
             /product="Replication initiation protein RepA  
             [replication]"  
             /"ID=F51\_03115  
             /protein\_id="gnl|SC|F51\_03115""  
             /gene="repA"

CDS        /codon\_start=1  
             46826..47104  
             /color=8  
             /locus\_tag="F51\_03116"  
             /note="Acyl carrier protein, protein  
             motif:CLUSTERS:PRK07639"  
             /product="Acyl carrier protein"  
             /"ID=F51\_03116  
             /protein\_id="gnl|SC|F51\_03116""  
             /gene="acpP"

CDS        /codon\_start=1  
             47116..49683  
             /color=8  
             /locus\_tag="F51\_03117"  
             /note="Alpha/beta hydrolase, protein motif:Pfam:PF00561.1"  
             /product="Alpha/beta hydrolase [hydrolase]"  
             /"ID=F51\_03117  
             /protein\_id="gnl|SC|F51\_03117""  
             /codon\_start=1

CDS        /ID=F51\_03118  
             49716..50666  
             /color=1  
             /locus\_tag="F51\_03118"  
             /note="hypothetical protein"  
             /product="hypothetical protein"  
             /protein\_id="gnl|SC|F51\_03118"  
             /codon\_start=1

CDS        /ID=F51\_03119  
             50898..51485  
             /color=1  
             /locus\_tag="F51\_03119"  
             /note="hypothetical protein"

/product="hypothetical protein"  
 /protein\_id="gnl|SC|F51\_03119"  
 /codon\_start=1  
 CDS 51502..52305  
 /color=8  
 /locus\_tag="F51\_03120"  
 /note="ABC-2 type transport system permease protein,  
 protein motif:Cdd:COG4587 protein motif:Pfam:PF06182.5"  
 /product="ABC-2 type transport system permease protein  
 [transporter]"  
 /"ID=F51\_03120  
 /protein\_id="gnl|SC|F51\_03120""  
 /codon\_start=1  
 CDS 52307..53101  
 /color=8  
 /locus\_tag="F51\_03121"  
 /note="ABC-2 type transport system permease protein,  
 protein motif:Cdd:COG4587 protein motif:Pfam:PF06182.5"  
 /product="ABC-2 type transport system permease protein  
 [transporter]"  
 /"ID=F51\_03121  
 /protein\_id="gnl|SC|F51\_03121""  
 /codon\_start=1  
 CDS 53104..54090  
 /color=8  
 /locus\_tag="F51\_03122"  
 /note="ABC-2 type transport system ATP-binding protein,  
 similar to AA sequence:UniProtKB:O07190 protein  
 motif:CLUSTERS:PRK13636 protein motif:Cdd:COG4586 protein  
 motif:TIGRFAMs:TIGR01188 protein motif:Pfam:PF00005.21-"  
 /product="ABC-2 type transport system ATP-binding protein  
 [transporter]"  
 /"ID=F51\_03122  
 /protein\_id="gnl|SC|F51\_03122""  
 /codon\_start=1  
 CDS 54096..55139  
 /color=1  
 /locus\_tag="F51\_03123"  
 /note="hypothetical protein, ab initio  
 prediction:Prodigal:2.60"  
 /product="hypothetical protein"  
 /"ID=F51\_03123  
 /protein\_id="gnl|SC|F51\_03123""  
 /codon\_start=1

CDS 55136..56626  
 /color=8  
 /locus\_tag="F51\_03124"  
 /eC\_number=6.2.1.3  
 /note="Long-chain-fatty-acid--CoA ligase, similar to AA  
 sequence:UniProtKB:P69451 protein motif:CLUSTERS:PRK07656  
 protein motif:Cdd:COG4340 protein motif:TIGRFAMs:TIGR01923  
 protein motif:Pfam:PF00501.22"  
 /product="Long-chain-fatty-acid--CoA ligase [ligase]"  
 /"ID=F51\_03124  
 /gene="fadD""  
 /protein\_id="gnl|SC|F51\_03124"  
 /codon\_start=1

CDS 56619..56864  
 /color=8  
 /locus\_tag="F51\_03125"  
 /note="Acyl carrier protein, similar to AA  
 sequence:UniProtKB:P80918 protein motif:CLUSTERS:PRK00982  
 protein motif:Cdd:COG0236 protein motif:TIGRFAMs:TIGR00517  
 protein motif:Pfam:PF00550.19"  
 /product="Acyl carrier protein"  
 /"ID=F51\_03125  
 /gene="acpP""  
 /protein\_id="gnl|SC|F51\_03125"  
 /codon\_start=1

CDS 56883..58142  
 /color=8  
 /locus\_tag="F51\_03126"  
 /note="phenylacetate-CoA ligase family protein, protein  
 motif:TIGRFAMs:TIGR02155"  
 /product="phenylacetate-CoA ligase family protein"  
 /"ID=F51\_03126  
 /protein\_id="gnl|SC|F51\_03126""  
 /codon\_start=1

CDS 58221..58841  
 /color=8  
 /locus\_tag="F51\_03127"  
 /eC\_number=3.1.3.5  
 /note="5'-nucleotidase YjjG HAD superfamily HAD-IA family  
 hydrolase, similar to AA sequence:UniProtKB:POA8Y1 protein  
 motif:CLUSTERS:PRK09449 protein motif:Cdd:COG5610 protein  
 motif:TIGRFAMs:TIGR02253 protein motif:Pfam:PF00702.1"  
 /product="5'-nucleotidase YjjG HAD superfamily%29 HAD-IA  
 family hydrolase [hydrolase]"

/"ID=F51\_03127  
 /gene="yjjG""  
 /protein\_id="gnl|SC|F51\_03127"  
 /codon\_start=1  
 CDS 58871..60739  
 /color=8  
 /locus\_tag="F51\_03128"  
 /note="Non-ribosomal peptide synthetase amino acid  
 adenylation domain-containing protein, similar to AA  
 sequence:UniProtKB:POC061 protein motif:CLUSTERS:PRK12467  
 protein motif:Cdd:COG0147 protein motif:TIGRFAMs:TIGR01733  
 protein motif:Pfam:PF00501.22"  
 /product="Non-ribosomal peptide synthetase amino acid  
 adenylation domain-containing protein [peptide  
 synthetase]"  
 /"ID=F51\_03128  
 /protein\_id="gnl|SC|F51\_03128""  
 /codon\_start=1  
 CDS 60912..61979  
 /ID=F51\_03129  
 /color=1  
 /locus\_tag="F51\_03129"  
 /note="Radical SAM protein"  
 /product="Radical SAM protein"  
 /protein\_id="gnl|SC|F51\_03129"  
 /codon\_start=1  
 CDS 61999..64239  
 /color=8  
 /locus\_tag="F51\_03130"  
 /eC\_number=4.1.2.9  
 /note="Phosphoketolase, similar to AA  
 sequence:UniProtKB:Q937F6 protein motif:CLUSTERS:PRK05261  
 protein motif:Cdd:COG3957 protein motif:TIGRFAMs:TIGR00232  
 protein motif:Pfam:PF09364.4"  
 /product="Phosphoketolase"  
 /"ID=F51\_03130  
 /gene="xpkA""  
 /protein\_id="gnl|SC|F51\_03130"  
 /codon\_start=1  
 CDS 64236..65384  
 /color=8  
 /locus\_tag="F51\_03131"  
 /note="PHP domain-containing protein, protein  
 motif:Cdd:COG1387 protein motif:TIGRFAMs:TIGR01856 protein

motif: Pfam:PF02811.13"  
 /product="PHP domain-containing protein [phosphatase]"  
 /"ID=F51\_03131  
 /protein\_id="gnl|SC|F51\_03131""  
 /codon\_start=1  
 CDS      65381..66169  
 /color=8  
 /locus\_tag="F51\_03132"  
 /eC\_number=2.1.1.163  
 /note="Demethylmenaquinone methyltransferase UbiE, similar  
 to AA sequence: UniProtKB:P67062 protein  
 motif: CLUSTERS:PRK08317 protein motif: Cdd:COG4106 protein  
 motif: TIGRFAMs:TIGR02072 protein motif: Pfam:PF08241.6"  
 /product="Demethylmenaquinone methyltransferase UbiE  
 [methyltransferase]"  
 /"ID=F51\_03132  
 /gene="ubiE""  
 /protein\_id="gnl|SC|F51\_03132"  
 /codon\_start=1  
 CDS      complement(66705..66806)  
 /ID=F51\_03133  
 /color=9  
 /locus\_tag="F51\_03133"  
 /note="IS256-like element ISCpe3 family transposase"  
 /product="IS256-like element ISCpe3 family transposase  
 [DDE recombinase]"  
 /protein\_id="gnl|SC|F51\_03133"  
 /codon\_start=1  
 CDS      complement(66925..67176)  
 /ID=F51\_03134  
 /color=1  
 /locus\_tag="F51\_03134"  
 /note="hypothetical protein"  
 /product="hypothetical protein"  
 /protein\_id="gnl|SC|F51\_03134"  
 /codon\_start=1  
 CDS      complement(67179..68024)  
 /color=10  
 /locus\_tag="F51\_03135"  
 /note="Plasmid segregation protein ParM ParM/StbA family  
 protein, protein motif: CLUSTERS:PRK13917"  
 /product="Plasmid segregation protein ParM ParM/StbA  
 family protein [partitioning system]"  
 /"ID=F51\_03135



```

        /protein_id="gnl|SC|F51_03135"
        /gene="parM"
        /codon_start=1
CDS     68533..69345
        /color=10
        /locus_tag="F51_03136"
        /note="Plasmid replication protein, ab initio
prediction:Prodigal:2.60"
        /product="Plasmid replication protein [replication]"
        /ID=F51_03136
        /protein_id="gnl|SC|F51_03136"
        /codon_start=1
CDS     complement(69612..69911)
        /color=7
        /locus_tag="F51_03137"
        /note="LexA family transcriptional regulator
Helix-turn-helix domain-containing protein, protein
motif:CLUSTERS:PRK00215 protein motif: Pfam:PF00717.17"
        /product="LexA family transcriptional regulator
Helix-turn-helix domain-containing protein
[transcriptional regulator]"
        /ID=F51_03137
        /protein_id="gnl|SC|F51_03137"
        /gene="lexA"
        /codon_start=1

```

BASE COUNT 28359 a 7014 c 11223 g 23415 t

ORIGIN

```

1 gaaacttcac caactacgtc tattggaatg aaattcaaat tacttattaa gtctttaaga
61 ttactgaaa gaaaatcttc ttttcagta gttgaaaaat tataattat atcttgatac
121 tcaagagcat cagataaatt aattcatgt tctttatcta aagtattagt aaattcttta
181 gataattcct gaaatagttt aatatcattt tcagctctat tacgagttct ttttagctca
241 ttaaacattc tttcagtacg taatttagaa gattctagtt ctttgaaact ttgattattt
301 tttctatta gtttatttag tataaagatt tttttgaaa gatctgaatt atttaaatca
361 tttgtatfff cagtgaatg attagtcct aatagagaat caatagaacg gttcattaac
421 ttagataatt gtattaatgt atatatgttt ggttctactt cagctcttc ataataacca
481 atagtagttc ttgctacacc taattttca gcaagttcag ctgagaaaag tttatffff
541 ttacgaaatt cttttatggt taaagctaag ttgtgtagtt caatttcaat catgtataaa
601 cctccttca atatatgttt agcaatttta gaagtaataa tctaataaaa cctcacttag
661 aaatgcaaaa gaatcttttt gtaaatacaa attgatatct atattgacat tgatgagtga
721 gcgtgataat atataggtta attaatgaa aatatggata aaggtgataa atatggaaaa
781 caagttaagc tttctaagaa agaataaagt gctttctcaa cgagaagttg ctagcttaat
841 tggtaaagaa gcacgtttta tcacaaatt agaaaatggg aaagtaaaaa accctagtgc
901 aagtgaagtc tataaattat ctagaatata cgatacaagt atggaagaaa tttatagagc
961 aatagtatta aacaactaaa taaattaaat ttaagtttg tccagtagga gaaaaggaga

```

1021 gcgaactacg cccttttta atactctttt aggacaaact ttaggagttg atgctgtgag  
1081 aggtaaagga gaacttaata aaaataaagt tggaaagtctt tatttagatg gttttcggg  
1141 gaaagaaata gcaaaaatat taggggctaa ggaagatact atttataagt gtcttaaccg  
1201 aaattttagt catttgaag aacataata agctaaaagg gaattgaaa aactacaaga  
1261 tgaagaaata agaaaaatta ctcatagaga atgtaaaaag tatatgagtg atagaaactt  
1321 tgttaagact aatagttcca ttacaaaca taatggacat ggaaatttta gtgttaaaaa  
1381 agaagaagaa atggatgtg tagttcctt cgacgttctt aacatttta gttttaagaa  
1441 aaagtttag acagcttgg acatagcga gatataatta aaaaatatta ttcaaaggg  
1501 agagagtaa aatgaataag agaattaagg ccataataga atttgtgaaa gtacataaaa  
1561 aagaaactat aggagttgca gttgctttag gaatagcagt cgttggtgta ggtggatg  
1621 caataagtaa gcattatgca aactgata ctaacaatat agctttagct gagaaaaag  
1681 aagatcctaa ggcagatgaa gataaaaagt tagaagaaaa taaagctgca gacaatgaag  
1741 aagtaactgt agaagagcaa gaagatggat cattaattgt taaagataaa gatgtaata  
1801 tcatgcaga cagttctaaa ggagacgatg tttctaagat agtgaagaa aagaaagaag  
1861 ctggaagcga tgttaataa aaaaataaaa aaggtgaagt tgaaaaagta gagagtgtg  
1921 ataaggaag tataaaagta accagtggg aactatagg ttctaaaaca gaaaataaag  
1981 ttcaagctt acaacaacca agtggtgaga aggttgagaa agtggaggat ataaaaggca  
2041 ctactgcaag tagtgaagga agtattaca ttgtaaaacc tagtaaggaa gaaagctcta  
2101 gtaagcctga aagtaacaaa caagagcaac ctgaagagtc aaagcctgaa gaagctccac  
2161 agccttctca aaaaccagaa gagaataaac aagaaaaacc tgcagaaaat caacaagaa  
2221 caaaaccagt tgaacctgca aaacctcaaa agcctcaaag aacttgggaa tatcaaagt  
2281 gtatgagcca agagctttg aatgatttta atgcttatag acagtctcaa gggttaatg  
2341 ctttaaactg gagtggtaaa tatgctggat ggacaaagag tctctgtgaa gaaatggc  
2401 aaaagcaaag tggcttccat aagagttatc cggaaggtgg tcaaatagtt tatgatggaa  
2461 ctgcatatac ttcagctagt tctatttaa atggattaa aaattctca gtcataata  
2521 agaatatgtt agatccggat ttaacagaag gagcttgtgc agtatataaa gacagtaatg  
2581 gaagatatta tacagttata ggtttgact attaattat atataaagat ctagagttt  
2641 actctaggtc tttttgata ctgtttttt cggggggaga acatatggga agagtgagga  
2701 aagattttta taaaggagaa gtctataggg gtgatattt ctatgcagac ttaggagaca  
2761 taaagagtaa gtttggttca gtacaaggtg gaattaggcc agttattgta attcaaatg  
2821 atattgggaa taggtatgga gaaactttg tagtgactt tgtaacatct caacctaaga  
2881 aagaaatgcc cgtacatact aaaataataa aagaatgtt agaaaagcca tctactatt  
2941 tattagagca aataacaact atttctaggt atcagatgag agagaaaata ggaaagctaa  
3001 atggatatga aataaaagaa ctaaatagag cattaggaat aagtattggt ttaagttaga  
3061 aagttaaga gtgttgaat taagcagcac tcttttaaa tacaatttt tagaaaggag  
3121 aaaagaaat gaattattt gatacatctt aaattaatt atcaaaataa aaaataaata  
3181 atatggagga gaaagaaagt gagtaaaaga aaaagattta aattaattac aacgataact  
3241 ttaattttta cattctgtt gactaacatc aaagtattg cagtagaaat aaattctaca  
3301 gacgcagaga gttatctaaa ttacaattct ccaactggg gaaaggttct tctataggt  
3361 aatcatagat actatgctcc agatctaagg acctgttatt gtctaaatac aggtgactg  
3421 aatccaactg gacaagatta cacagaagaa ataccagttg atggaggaat agaaactatt  
3481 atttattggg ggtaccctgc taaagatggc tcagaatggg ggatatcagc tgatgaatat  
3541 agatattgta ctcaactgc tatttgggct tatcaaaaag aagctggtt aagtagggga  
3601 attgatagaa caagacttca aatggaaca gtatcttaa gtagattaa accagtaata

3661 gacttttttag tagaaaaagg attaaacaaa gagttaccaa cattctttga agttactcct  
3721 agtaatatag ttgctcatca agaaggtgat tatttcgttt ctgagcctat aaaaataaaa  
3781 tctgactatg agtttaaaga tgctaaggtt actataaaaa gttcaagtaa tccaggatta  
3841 aaagatgtag ttaagataaa agatatggat ggagatgaaa gaaataccta taattctaac  
3901 gaaagtttta aagtttatat tcctatagac gcagaaacag gagatattaa ggttgatggt  
3961 aaagcaactg tagaattacc agcttcttta gcttatgcaa ctccagtagc aggtaacaa  
4021 gacatggcac ttgttgatth aagataccaa aatatgaata aggataatgt tactgtatcc  
4081 tggactgggt taaatggagc tatagaactt gttaaaaag gagacgatgg atctctttta  
4141 actgggtgcta aatttgtttt gaaaaacaaa gaaggcaatc aaatagctga agctacatca  
4201 gaaaatggta gagtagtatt caatgacatt aagccaggag aatacatcat cgaagaagtc  
4261 gaagctcctt taggatattt aattactaat ccagttaata ttactgtaaa acctaataaa  
4321 gtaactactg ctgaaatggt tgatactcaa ataaaaggaa gagtagaat acaaaaaatt  
4381 gatgaagaaa ctggcgaacc aatttcaggt gctgaatttg agatggtgaa ggctgataat  
4441 aacgaagtag ttgagaaaa gactacagga gaaaatggaa aggtattaag tgggttacat  
4501 ctttttgaa actacattgt aagagaaaca aaagcccaa gtaaatatgt gcttaatggt  
4561 aaagaatc cagtactat taatgaacat atgaaacaa tagaaattac tcatgcta  
4621 agaaaaatta agggtagagt ttcaatacac aaaatcgatg aagaaatgcc agaacttagt  
4681 ttaaaaggtg ctgtacttgg tatttatgat gatgcaggta atgaattga tagattaaca  
4741 actgacgaaa agggagctgc aacaagtaag tatctagatt atggtcacta tatttgtaaa  
4801 gagctacaag ctccagaagg ttacaagta agtgataaaa ctatagacat aacataact  
4861 gaagatgata aagtttattc ttatgacttt actaacaag ttatgaaagg tgcattcaa  
4921 atagttaaag ttgatagta aaacgaagaa aaaccagttg ctaacgcagg ttttaaagtt  
4981 gttgcagtta atgttaatgg tatagaacca ggaactactg tagataaagt taaaactgat  
5041 gaaaatggat ttgcatttac taaggatcct agatatggag tgtacaaatt cattgaagat  
5101 gaaactccag aaggatattg ggctagtgat aaggaataca caattaacat aatgaagat  
5161 aataaagttt atgttaaata cgtaaaaac gctcctatcc aagctaagtt aagagttggt  
5221 aaagttgact ctaaagacaa taaaccacta gaaggagtta aattccaagt tagaaataat  
5281 gatactaata agctttaga gtttacaac ttttaggaa taattcctca taaaacaact  
5341 actttaacaa ctgataagaa tggagaata ataactccac aacacttagc atacggaat  
5401 tatcaattgg aggaggcaaa acctaaggat ggttatataa gcataaagcc aataccttt  
5461 aaaatagacg aaaatgccgc tctagaagat attaaggact taggtactgt ttactactt  
5521 aaggtatcta acgaccgtat aacaggcgat atggagcttt taaaggtaga cagtgaact  
5581 aaagaacat tagctgatat tgaatttaa gttacagctt tagatggcct aatgaaagga  
5641 caaacttggg acttaaagag taatgacaaa ggaatagtta gtttaaaagg tttagaatat  
5701 ggccattaca aaatagaaga agttaaaca ctttgaatt acgttattaa caaagagcct  
5761 attttcttg atgttaaaga aatgggtcaa gtaattaagc ttgaaatgga aaataaaaag  
5821 ataagagcta atgcagaatt aatcaaggta gattcagaaa ctaaaagacc acttgaaggg  
5881 gctgagtttg aactttgaa tgggtgaaaag ctgttaggaa attacacaac taacaagat  
5941 ggaaaaatag tagttgaaaa cttagaagca ggtaactatt atttcaacga aattaaagct  
6001 ccagatcatt acgaaataaa tcaagatcaa gatttaagtt ttgtaataga taaagacggt  
6061 gaaactaaga ctgtaactgc agaaaataaa gttaaaactg gagaagtaga ctttactaaa  
6121 actgatgta caaatggaca aaatattgaa ggggctaaaa tagagatagt aggaatagaa  
6181 gaacaaaaca aacatgttaa atttgaattt acttcaagtt tagctggcaa taaattcact  
6241 ttaccagaag gtaaatatga gtttagagaa actcaacaac cggaaggata cgagctttct

6301 actgaagttg gaacttttga aattaaaggt ggagaaatta taaaggccaa cttaaagaat  
6361 gaaagaacta caggaaaact tatctttact aagacagatg ttgctacagg agaagttctt  
6421 gaaggagcta aaataaaaat tgaatgtctt tctggcttag ataaaggaaa ggttattgag  
6481 tttatttctt caaagaatgg aatgagttt gaattagcag ctggagaata caaaatctca  
6541 gaaactcaag ctccagaagg atatgagctt acaactgaaa ctggaacctt taaaataggt  
6601 gaacatggtg aagtagttaa gtgtaactta actaacaaga aatttgaat tgttaaaact  
6661 ggttcaagca tagatgttaa tgcattaatt ccatttggaa ttatcttagt agcaggaggc  
6721 ctaggagcat taactcttc aaagaaaaga aaattatcat aatttttta attaagagag  
6781 tgccataagg tactctctta agtttacata agaaaataag gagatgggat gtatggttat  
6841 aactattatt ttaggattga ttattataa tttttatg tatatgagtt tatttaaagt  
6901 ggctaaaaaa gcagatgaag aacttgaat attatttaa aaacataatt ttacaata  
6961 aaaggagtg agaaaaatga gtgaaaactt attatgtgaa atagaaaaat tagatttaga  
7021 atttagttct ttatcaata gaaaattaa taaaaggac ctagaatata gaaaatatt  
7081 aatttcaaaa ctacaaagat tatcgaaaga gtatctaaga gcttggtaa taagaaata  
7141 atataaactt gagaagatcc taagaaagta ttactttgaa tatcatataa aacatattt  
7201 taagttttt aatttcagta acatagctgt ttaaaaatgg tttttataa ttttttact  
7261 ttcataggaa ttctttaag tattttagga cttttttc ttatattagg tttggataat  
7321 tatattccga ttgtggcaag gatgatgttt ttagggatat ttatattggg aatttttatt  
7381 ataggacttt cttctcattg ggtattaatg agtataaaga tactgatatt agaaagtata  
7441 ggattattta tattaatat attttaata ttcattttt ctaggatga agttaaag  
7501 aagttataa aagtatttt gatagcttta agagtttat taggtctgtt aaatatata  
7561 ttaattttt tttagttaa aaatttaatt aaagcttatt ttacagtat aggggtgtt  
7621 taaaatgat aaaaaagcct ttataacctt aatcataatt ggaatattgt taataggagc  
7681 agctttattt attgagtta aatcaaagtc aatccaggat gatttagttc aaaaatacga  
7741 agaaaaatg tatagtaatt ctccgtaaa gtatagtatt tctgaaacac ctgaaaatac  
7801 agagaaaaaa gaagatataa aagatacttt tactcaacct aataacaata agaaaaatga  
7861 aaaaaatgat gtgattggaa tattagaaat agatagtata ggggttaaag ctctatagt  
7921 tttaggagaa gaaaacttag attatgtagt ggctaagtac aggtcaagtt ctgattttg  
7981 agaattagga aatgtaatat tagctgcaca caataatatg cgtggatcta tatttagaaa  
8041 cttcataag cttaaatag gatctacagt aaaaataata tctgataata aggaactga  
8101 atataaaata acaaacgat atatcgtaga gcctaagac acaagcaaaa taaattttc  
8161 taatgacaag aaagaaataa cttaataac ttgtattaat catgctaac aaagattaat  
8221 ttaactgga gaattagta attttaactt ggtacttaa ataaaatagg aggaaataa  
8281 tgtgatgaa taagaatact agaaagatag gcgaagttag aaagaaagtt gaagctataa  
8341 gagaagaact agaaaaggat gttctttta ctgctaaaac acaggagtca aaggagagaa  
8401 ttaatgtaat aataactca gatgccaatg ataaaataat ggactttatg tatgataatg  
8461 caaagttct taaagaacaa tatggcatac aatctaggaa taaattatta gctgcaatta  
8521 tagaattga agcagatcat atagaaaata ttttgaaga gttaaaaga aaggagaat  
8581 aagatatggg atttagttta agaaagtctt ttaaagttgg taaaattct aaagttaatt  
8641 tatcaactgg aggggtgtg ggatttagta caggtaaaga aggagcgaga gtttctgtaa  
8701 ataaaaatgg agtaaactta tatggtgta aaggtattt acgatttact aaacatata  
8761 gtttaagaa aatatttagt ttttaaca atctaaaca ataaaataat catataaac  
8821 gagtgttct ccaagaactt aaataatgtt caaggggaa tttttatg caaaaatcaa  
8881 tgttaaacc accaattaca aggctaggtg gaaagagtaa attaagaaaa gaaataataa

8941 gtatgatgcc agaccatgtg tgttatgtag aaccattctt tggagctggg tgggtgtatt  
9001 ttggaaagga aaaatcaaag attgaagtaa taaatgacat tgaaaatgaa ataccaaacc  
9061 tatttaaaat tataaagtac catgctccgg aatgaaaag acttctgtct tatgagatat  
9121 ctggaaggag tatattcgat gaatataaaa atgctacttt ggagcattta accgatatac  
9181 aaagagctat aagatttatg taccttataa ctcaaagttt cggcgggtcaa ggtaatcatt  
9241 atggttatgg aactaataca ttgcatcac aaaaaatctt tgattgtaac ttagatgagc  
9301 tacaagaaag attaaaaaac acctatatag aaaacttaga ttttcaaaaa ataattgaaa  
9361 aatatgatag ggaatataca ttattttct tagatccgcc gtactatggt acagccggat  
9421 atgaagcaaa gtttgaata aaagagcaat taaaacttag agatattctt aaaaatatca  
9481 aaggaaagtt cattctaaca atcaatgatt gtaaagaaac tagaagctgg tacaagatt  
9541 ttaatataaa agaagttgaa gtacattatt cagtttcaag acaatcagaa ggaagaaaa  
9601 gaaataaaga attgataatt acaattact aaaaagtaga tggaaggaga ttaaaattat  
9661 ggctgtaaag ttagataaaa attcaaaaga attagcacia gatttattaa aattacaagg  
9721 agtagattat atagagtgg taaataaaaa gcaccaagaa ttaataacta agaatacaaa  
9781 gattataaga aattgtgta aaaatgaaat aaaaaactca agtaaaaaag atgaagttat  
9841 agaagaaatt aatcaagaaa gtaatgaaaa tcttgaaggt ttgaagatg aaaattacaa  
9901 tgaggatgaa gtagaaagtg aacggaagga gtaatttat taggtgaaag atttaataa  
9961 atatgctttg gagtatagaa aagttgtag gtatgctctt aaagaaggcc ttgcaattta  
10021 taacaacaac ttatcagaat tatataaaa tcatgagatt gtaaagaaac ttttagagaa  
10081 ggataacttt gattcagtt atggcaaatt atcaatttgg agaagtttaa aatggataga  
10141 agtttactct aaaaatagat ttataaagaa ggtaaaagta gaaaaaaaag ttataaatgt  
10201 aatagcaatt aatgtagaaa tatttaatac ttaaattta cttttagaag attaaaaat  
10261 tcaaaaatgt gtgcaacttt atgtacaact tcttgtgcaa ctttgtgtc aacctaacg  
10321 ttttaaaaaa tattaaagtt gcacacttat attattgatt atacaaggat ttatagcaat  
10381 ttggtgcac atcgtattat agagtatata ttatatatat aatatataca tataatgat  
10441 taggagtaaa ttgtgttta atttgcgact aatatttta tatgtatatg ttgtatagat  
10501 aattttatac tcttaggcta tagatgtata tctatagtct atacagtaa taacgtatag  
10561 ttatttactg tataatataa taagtaattt attacttatt atattatttt agataggagt  
10621 atttcattt atgaatatat ataacttaa aaaagaaatg aaaaatatta tttattctga  
10681 ttcttctta agtaaaaatt ctattagaga tagaaactca gctcttaata aatatttga  
10741 aaattttaat aaccttgatg atgttctgt tattactaaa gataaaatt tagataactt  
10801 aaattcaatt aaatttaaaa ctaaattatc tgcaggtgtt aatgctatta gatttttaa  
10861 agagcataat cttgatgtt attttcttc tgaagatgaa ctaaagaga ttattaaaa  
10921 taaaaagaag aataatcgta aacctactgc agagaaaaat ttaattgata ttgaaagaaa  
10981 agttaatcga gttagaagaa aaaattatag attagcttat aagttaatgt tagagtccgg  
11041 acttctgtt cacgaagttg cagctttaa gaaagatgat ttttctttg ataaaaactt  
11101 aataactatt aatcttagag aagctaaggg taataaactt tgttctattg aactgaaaa  
11161 taaatattta tcaaaaaata ttagtgagtt tattgaaact aaaagtgaag atgaaagagt  
11221 atttccacac atgagatact tacaagaaca agctactaaa ataggaataa agtgtcatga  
11281 tctcggaagg ggatttgcta aaagaacata caagaagaa ctagaaaatg actctcaag  
11341 aagtgaggct ttagataaaa ctagaataaa gttacgtcat actagaagt atactactaa  
11401 gatttatttg aatagtaaga ttaaagttta aataagagt cttttataa gtgctcttat  
11461 ttttattatt ttttagaaa ggagtgattt tttgagtag tgattgggag aaaaaagtta  
11521 atcaggaaat agagaatgga gcaaatgcaa ttataaatga gattgcaat gttctaagaa

11581 ttttctttt tagagtggga ttaggtttta aaaaatcatg gaagaataaa aagcttttta  
11641 ttggtttctt ttaagtttt ttaattccta tagctgcaag aattaaagt gattatttc  
11701 ttgtagatac taaattttat tttaaaataa tatatttttc aacctttata gctcctttat  
11761 ttatatggc tataatatcc tttgtaata gaaaaggaga taaggttgag gaagaattta  
11821 agaaagcttt tgaagaaatg ggctttatag atatttcagg taatgcacct aaattaatta  
11881 atattaaaca tgatgaatta actggaattg accaatactt tttaaaaca tttattccat  
11941 tagatgattg gcaacctaaa gctagattaa tggagtctag attaaataaa actatctttg  
12001 aaattattca aggtatagac aaacagacag ttcaaatgaa tgctttggag ggaagtgtta  
12061 aagtttctga taagctttta tggagtaatg atttaattcg tgaggaaggc gtattaaatt  
12121 ttgtaagag tatttcaagt gaaataaaaa ttgatttaga tgaacaacca cacgttttag  
12181 ttgctggtca aactggatca ggtaaactg tacttatgag atgtcttttg tggcaagat  
12241 attgtcaagg tgcagatgtg tatatgatag attttaaagc cggcgttgag ttcggtttag  
12301 actatgaaaa aatcggtaag gtaatgaccg aagtcgatga aactttaaag ctttagaaa  
12361 cttaaatagt tgagaataca gaccgtctaa agaaatttag agaagctaaa gttaaaaaact  
12421 taaaagaata caataagaag tttaaaactc atttaaaaag aaaagttgta tttatagatg  
12481 agatggctca acttatggat agctcaggag ttgataaaga aactaaagct aagttagaaa  
12541 aaataagtta ttgtattgct acattggcaa gaacagctag agcatcaggt ataaatttag  
12601 ttttaggagc tcaaagacca gatgctaag ttatgaatgg tcagattaaa aataacgta  
12661 ctgttagagt atgtggtaga tttcagatg gaccagtttc agaaatagtt ttaggaaata  
12721 ataaagctaa aaagcttcca gagataaaag gtagattttt atttaaggta gatgcaaca  
12781 ctattgagtt tcaagcttac tattttaatg atgataaaga ttttaagcca gagcaagttg  
12841 aaagacaaaa gtctcaatat gaatttttt caatcaaactc tcagatgat gatttaataa  
12901 ttgaggatgc tccagttgaa aatatttcag ttgttgagaa taaaactttt gatgacataa  
12961 aacaagaaat agatgtcaat aaagatttaa aacaagaaaa gcaagatgta aataaagaat  
13021 taaaatctaa aaataaaaca gatattctat caagtaaaga ttgggatgct agtaactttt  
13081 aattaaagg gtgtgatgaa aatgaaaaat agtgcaatag aaaattttga aaaggcatta  
13141 gcagagcttt gtcgttctgc aagaaaagaa aatttaaag taaatcttga tgtttacaaa  
13201 gataaagaaa agaaaaagaa ttactatggc atagtaatta gagataggag tgaggattgt  
13261 gtttagaaaag aataaagaaa atactaagcc taaaaagag aagaaagaaa aaaagctttt  
13321 cttaagaaa aaagataaac ttaacatgga tcttgaggat tcagttgcta atttagataa  
13381 gcaggttaat ggtgttaagg agaaaaaatt agtaagtgt atgccattta gaatagcaag  
13441 agcttttata tgggttctta taggtattct ttgttttagg ggtggagttt cagtcttaa  
13501 aggtaatcaa tctgaagctt tgaagaaaga aatgaaaag atattaaata atattggagaa  
13561 gcaaagtca cttgaaactc aagccttttc ttttctgaa gaatttgctt gggattattt  
13621 tttagatata ccaattaata ctcaagattt tataaataga ataacaaagt aactacaga  
13681 gcaactagca aatgagatga ataatggaac ttattcagat gtcatttata ctagtcttt  
13741 ttattttgaa aaatattctg aaaatcaagt taacgtaaat gttaaagcta gagtaagagt  
13801 ttatacact aaagctggtc aagagcaaac tccacaggac caacttcagt atgatactaa  
13861 tttagttgat tactatttag aagttcctat agttttcgat aaagatatga atattggctg  
13921 agatgcatta ccagtaatga cagctccacc agagaaagct tatttcaaaa ataaagagtt  
13981 ctccggaact agcgaatg atgctgataa aactaaaaag attacagata gtgtatctca  
14041 attctttaag gcatattatg agcaaatca aacacaaata gattatttct tagttgatgg  
14101 agcagatatt aaggagcag gtcaaaaagtt ctcttcaat aaaatcgata gaataaatat  
14161 ttataagctt agtgataag aattcttggc aattgtagac ctaaataatg attcctttgg

14221 aaattcaata aaacaaggat ttaaccttac tgtagttcaa gaaggagaca agttcttagt  
14281 taaaacttta gagccaagaa cttcaaacat agatttaaat aataagatca ataattagga  
14341 ggagttatta tgaaaaattt taagaattta aaagagaaag taaaattaca caagttaaga  
14401 atacaaggtt tttttgtagc attattatcc tttatgacaa cttatagcac ttatgcttat  
14461 gcagatataa atggtgagag tataaaaact aatcttataa gtaatatttt attacctata  
14521 tctttcgtag ttgttgatt cttattaata aaagaacttg ctaaaaagag cgttgcaggt  
14581 atattagttg ttctaattgt aggtggttc gtaattataa ctatagctca accagattta  
14641 ataaaatcct ttgtaactt tgtaaaaact atattaggtt tataggagtg atttttatgg  
14701 aggaagatag aaagatttta agaagctata ataagcttaa aaactttgaa attaaaattt  
14761 atagattagg aaatactaaa atacctttc cagttcctat aacaactaca gttttattcg  
14821 ttgtggcatt aataataatt gctattatag atgctacaat tggaatacac ataaatttta  
14881 tataaagta cgttgcttta ctttaggta tagcttatat agccaaaaat aaaaaatag  
14941 atggaaaacc actgcataag tatttactaa gacttataca gttc AAAA atcaagaat  
15001 ctaaaataga aagatttgag attcgagaga attagaaaag ctttaggttt atagaaagat  
15061 ttaggttga ctataaaatc ataaaatttt atattgaaaa tgtataattt tgaggtggtt  
15121 ttatggaaaa taaatttaaa gattttttg atgaggaaat aattacaata agtaaatcag  
15181 acgctattaa aagattagcg agaagattta aagttgataa tttagaagct caaaaaat  
15241 ataatgagtg gagaagaaat tgggtgatg taaccaaaaa agagagttag ttttactaa  
15301 ctctcttat tttattccaa gtttgaaagg agtattta atgaaaagta acaaatttaa  
15361 ttttctata aattttgtaa aggaaaattt gattttta aataaagcct gctatgcagg  
15421 atttaaactt aatggattg aatatagttc ttgtaataat agtgaaaaaa ttaggatatt  
15481 agatagtta accgaactta taaaagaaat acctagttaa gctcagattt tattaattcc  
15541 aagagcagtg gattgtgaga gatccataag acctatgata aataaaatcc aggaagatga  
15601 tcctttgaaa gaagtttcaa caatttttagc agagaaaact atagaaattt tagaagaag  
15661 agctgaggat agatataat ttaactctgt tactgaagaa aatgaattca ttgctggaga  
15721 taaaacatta gaatagaca catatatatt ttttccctt ctaaaaggcg acgacaagga  
15781 ttttatttct aaaggagggg aatattcga gtatatgata aaaaacctt aaaaggctt  
15841 aatgagttt ttaggcatat ctgaaaaac catatctgaa agagatttta gaattataa  
15901 gaaaaagtct acagaattt tagaaatata atctatgaga ttgatatac gtccttaag  
15961 aaaaagttaa atagatagtt tgagtccag ggttactaaa cgtggtcctc aatcagcggg  
16021 tgagcttgtt aatggagtg ataatttctt agaagtagag caagatgaag aaaaagttat  
16081 ttttcttta agaaatgcct ataaaaatag agttactggc cttatagagc aaggtgataa  
16141 aatattaaaa atacaaatg atggatttac aagttatcag actttcttgg ccataaacia  
16201 tattccaagc atggagttc caggcgttga gtatataaag ttaatccagg atatgaatat  
16261 tgggtcagag atatgcattc acataaagaa gtttctgcg gaagaaagca aaagtaagat  
16321 aaaaaataaa gctgctaaga taaatgcaca ggtaaatgaa gcacttcaag ggggacatat  
16381 accatctgat gaagaatacg aagcgaaggc ggccgcagag tcgttagaaa aggaagtaaa  
16441 gagaaataaa catataatcg aaacaagtat aagtatttgt ttagcttcca caaaggagaa  
16501 aatagttaga aataacacca aagtcctat ggaatatttc aataaatcac taaaattga  
16561 gcttataaat ccataacag accaatacag aattttctta gattttatc cagctaact  
16621 taattataat agagacttca tacagctagt tccaatggaa acattagcgg gtggagtatt  
16681 tggagctagt gaccattag gagatagcgt aggagcctat ataggctaca cagtaaatgg  
16741 caatagaaag gtttatttat acatgggaag agctacaaag ttaataaat cacctgctat  
16801 gggcatatac ggtaacttag tgggtggaaa atctttta atgctaatctaa ttgtagttt

16861 acatgttctt ttcggtagct cagcactaat ttcgaccct aaaagtgaaa ggtcacattg  
16921 ggctgctaaa ctgatttca tgggagattt aataagtata gttagattaa cacctaacga  
16981 tgaagataag ggtaaactag atccatttaa tctttataac gataatatag acgaagcttg  
17041 tgacttagct ttaataataa tagttgagat tgctaataca aatgaagaag aaaagataat  
17101 tttaaaagaa actttaaata aatgaagga tgaaaaaaga ccttcaatga agcgattaat  
17161 tgaatgatt aacgatgtat cagatagtga tgctataaa aaagaagcag agcgtttgg  
17221 aagaaaacta aatgcatcaa aggatgtagg tttatctaaa cttattttg gagatggtag  
17281 tgaaaaagct attaactag acaatagatt aatatctt cagatagata atctaacaat  
17341 tccagatcaa ggtacaaaga aagaagaata ctctgaagaa gagaaattaa gttcttgg  
17401 aatgatgctt atgggaagtt ttacgaagaa atttgctatg aaaaaagaa ataccttca  
17461 ctaataactc tttgatgaaa gttggtttt gaaaaattct gctgcaggta gaaaattata  
17521 tgactttta gcaagacagg gaagatcctt aatgttga tgatattta acgggcatc  
17581 agttcttgac ataccaactg aagaattaa aaatactata acatataagt tatgtttcaa  
17641 aacaaataat agagatgaag caagagaat gcttgaattt atgaataaaa gcattactga  
17701 agaaaatatt aaaatgctta tggaattaga aataggcaa gctgtttcc aggacttaga  
17761 tggaagggtt ggagtaatag aattgacgc tgttttgaa cagttatag agtgttttag  
17821 cacaacacca gaagatacct taaactatga ggatgttct taatgaaaa gcttttata  
17881 tggagtggaa taatatctt gatattcca ctctattt ttttctaat tataggggga  
17941 agtggatgaac agccaactcc agtaaatct aatcctaatt taacggaaga gcagctta  
18001 ttataagtc agattgttc cggagcgaag caatcctatg aagaacagg aatattcca  
18061 tcaataacc tggcacaagc tatattagaa agtgggtggg gaagatctgg gttggcata  
18121 aaagctaata atttattgg tataaaagct gactccgat ggaaggggaa agtattagaa  
18181 atccaactc aggagcatgt taatggggga ataataacta ttatagcaag gtggagagtt  
18241 tacgaaagct ggaatgaatc tgtaatagat catggtaaat tctttgtaga aaattctaga  
18301 tataaagaaa atgggtcct ggatgcaaaa aattatgtag agcaagctca gtgcatacaa  
18361 aaagcgggtt atgcaacaga tccaaactat gcaaccaat taatccaggt aataaatgat  
18421 tttgactaa atctttacga tatgaacgga gatgtttag ggaatgatgt tatagaaaa  
18481 gcaatagaag ctggaatgaa gtgggttgg aaatctcat atgtttggg aggcggtcgt  
18541 aaccaagctg acgttgatgc aggacgattt gattgtagtt ctctagtca ttattgtat  
18601 gcatctgcag gaatacagtt agggccaaga gaaagtgtaa caacatggc ctaataaac  
18661 atgggtaaac ctgtactgc aagtgaaatg aagcgtggag actaatatt cttcgaact  
18721 gctggaagga acggccatat tggaaatctac ctggaaatg gaaaattctt gaatgacagt  
18781 tctaccaag gagtaagtat tggagaccta aatagtgtt attggagcag atatttaac  
18841 ggaaatgtaa gaagagtcgt agaataaaaa ttcggctta agaagaaaag tacctggata  
18901 attatcaata ttttaaaaa tatccaggta ctttttata aatttacgaa cattaatcgg  
18961 aggtgtgaaa tggagaatgt gaagattaat atatagta aatttctgta tttgaaaaat  
19021 aaattaactt ataaaaatat attaaaagca atagttataa ttgcaactat cgttatagct  
19081 tacaactgtt taactaaaat agcttatgca gatggattt taagctatgg taatagtat  
19141 gatccttata aaaacattcc tgaggatgg ggaatgtta tttctgaaa gtacagaaat  
19201 aactatgct tagatattat agatactcat gttgggagc ttatagataa ggctataaca  
19261 ggactaacta atatagtatt tagcggaaata gtaatgatta gttggttgg agtaaatata  
19321 tttagattt gcttcacaaa tgatagact gcaggcttg caaatcaatt aatagtgtg  
19381 ttaggctctc taataatgg aatttcaac aatttctta tgatagtatt tatgattca  
19441 ttgtttcaa tagttataa tctatataa agaatttta gtgcaatagg atcacaata



19501 cttgcagtag ccataatata tgcaactaca gcttttttaa gcaatggagc agttggcttc  
19561 ttatctaaaa caacggagtt ctctaagact ataggaacta gtgcatagtg tgctataaat  
19621 ggtaaagata ataatgaggg ttcttagaa gattattcta aaactgtgtg aggaacctta  
19681 tggggaaatt tcgttcaaca acctgggta atgctagaat tcgatggaaa ggttcctta  
19741 aatgatgaaa atatgacaac taaaaattct ataatgaag aagcgtaaa ttactgaaa  
19801 gatatactat cagagcctta tggtagtgat gaaagagaaa aagctttaga gtcaataaat  
19861 gaaaaattta ataaggagtt gtttcaaag aatggcataa atactaagtt ggtatccgta  
19921 tgtgtattat tcgtaataac tctaataaaa atgattattt taatagctgt aggaatgata  
19981 caaataggat ttcagcttat gtcaattctt ttaatattgt tacttccatt tatcatgctt  
20041 attgcatag tgcctttctt tgggtgtaca aatattataa aaggaatagc aagaaagat  
20101 ttaggaactc agctcggat aattgttagt agctttgtat tagccttact ggttcttga  
20161 gatactgta cacttacaat gtttcaagct tggggagcta acttaataat agctctttta  
20221 atgcagtga cttgttgat catggttatt gcctttagaa aacagttaat gaacgggta  
20281 ataaccttc aaaatagaat tgctccagga acagcaggag catttaggtt tggagctaaa  
20341 ccactagata aaggtgctga tattgcaaag gaatatgcag taaatccagc tatggataga  
20401 gcgatgaca taggagataa ttaataact aaagctcaat atgctaaaga atatacaaa  
20461 ggaaattaa gtctttaca agacagaaaa gtagcacaag ctatagattt cttaggttct  
20521 aaatacgata atttaaaaa taataagcct gaagatatag agaatgctaa taatcaaaa  
20581 gaaatatag acggggtaa agatacaaaa aataaagtta actcaaatga aaatatcaat  
20641 aaaaaactg tagaaaaatt tgatttaaat ggagttaagg cactaaacc tagtaatata  
20701 acttctgaaa atattctaa taagaatatt aatggcgaag ataacctaa tattgatgaa  
20761 gacgcagta ctaaaaatga tataaaagat cctatagaaa ataaggatat agctctaaa  
20821 actatagatg aaaacattaa aaataatgga aatgataatg gaactatcca ggataaaagt  
20881 ccaggaagta aagaaaataa aactatttct gaagatgagg aaataactac aaaaccgaa  
20941 gaaataaaaa ctctgaaaa gactataaat aaagaaaatc taaatgaact aaaaaatgaa  
21001 aatacatctg cagataagaa aaataatgat agtaatagta gtaatataag tgttactgaa  
21061 attcctgaag atttagtga ggaaaaatct gttgaagcta taaataaagc caaaaatgat  
21121 gttaaagcaa ataaagaaaa aataataat aatataaatt ctaagaatgt tgaaagtaat  
21181 cctgaagtaa aagaaaatat agaagtagct tcatcaccag aagttacaga aattaagaaa  
21241 aaatctacta agaaagttga aaatatcaaa aataatggac aacaaaaga aaaatctgca  
21301 gataagaaag aaattaaaga agtatcaact aaagaaagag ttgagagagt aaaatcattt  
21361 atgggagtaa gtaataagga tataaaatct aaagaaaagc atttagaaaa taaattagaa  
21421 tacattaaga aaggaaatag caaaaacttt aagaagaagg ggagctgatt atgctatata  
21481 aaacacattt atcaacatca ctaaattgtg caataccagc tttatatcta agcaatgagc  
21541 tatcactttt aacattaacg ggagtaggct tggggagcct acttccagat ctagatactc  
21601 caaatagttt tattggaaga agattaaaga taatctcata tcccttaagt acaatatta  
21661 agcatagggg atttcttcat tcaataactc ctgtaatatt aatatttatt ttaggcatat  
21721 tcttaaaatc actatttata aaatctatcg cttaggtta ttacttcac ttagtagggg  
21781 ataccttctc agaaagcggc ataaagtggt tttaccttt ttataataaa gatattaaaa  
21841 tgccattagg tattctaaga tatagaaccg gtggcctaaa agaataatgtt atactaggaa  
21901 taagcattgt aatattaatg ctagaatac aaaaatttca ttaataaac ttattttcaa  
21961 tataggaggt aatatgaaga agaaattagt attttaggt ctaatatgtt taagtttatt  
22021 tgcttttga ggttgcggaa ctgaaaaact agatataagt aactgcatag atgtacgcta  
22081 tggagaattt aatggttcag caaaaatata tgaaagtagt ttagatttag gaaagttaca

22141 agatattcct aagttaaagg gacttactcc tgatagccta aaaggagact ataaaataac  
22201 tttagtagga gataaaactg atttaaaaaa tggagataaa gttaaacttc acctagagta  
22261 taacaaagaa ctatataaaa gagactttaa tgtagaattt aaatttgaac caactgaagt  
22321 aactatagaa ggtctgccag ataagttaac agatataaat caaatttcta aagagcaatg  
22381 ggataaaata tatgctgaag ttaataaaaa agctgaaatt aaagctaaag ataataaata  
22441 ttctgactta aaattagaaa aagttttaga atttaataaa aaaaaatctt ccggtggaat  
22501 tacaatagag tttatttatt catataaaaa taaacttaat gaaactagat atataagttt  
22561 ttatcattta tttaaattcg ataagaaaaa tactttttct aatatagaat ttttagaatc  
22621 atctatttgg aatgataaat tttcaattaa ctatagcaat acattaaatg aatatataaa  
22681 acaggtatat cctgataata attataaagt tttatggagt gcagaaaatt aatttttaa  
22741 tttagatta taaaataacg atgataaaat tatattatca tcgttatttt tataaaaaat  
22801 tttggaata tattgtctaa ttttaggaaa tattgtataa ttaatttact caaggaaaaa  
22861 gataaaaaat actataagaa attaataata agttatatac tcgtttaaatt tacatatata  
22921 aatttttcat agtttaaaaa ttttgatttt tactatgttt atttgttatg taatttaagc  
22981 gagttctaaa gtccaagctc aaggaatttg agtttgggct tttttatatg cttttttaga  
23041 gtatagacta caaatctata cagttgccta taacttaaat aggagcatgg taaagccgtt  
23101 gtgataacgt aatatattac cggagtgagc agatacacta taaactaatc tttagcgaag  
23161 ctaacaaggg tttgattgag ccaaggaaga aagttgatcc ggctattctc atattacaca  
23221 tatatgaggg tataacgtaa gtcttattga aactctgatg aagatgttta gtctaagtag  
23281 ctctataaga gctatatgac aaaattcagc ggttacgtgg agtacctgca gcttaaaaaat  
23341 aagctgcaac gaaaggaacg tatagagcag tagaaatact ggacaggtag gggatcaatt  
23401 cctgttttga tgtacggatt aggtgaaata ctaactacta atgtgtgttt accgggacca  
23461 taggttaatg tggcgaggct ctgcataggg atcttaattc ggtgacatag ttatcctgtt  
23521 ctttttttaa ttaaatcgga caggataact atgtacattt tgagggtact cgggatctaa  
23581 tcattaaaaa cttaaaaagt caatatataa attaaatgta aatttgaatt tatttagata  
23641 ttaatagatt ttataagaag taaagtgatg gtgaagtaag atgaataaga gaaagtgtac  
23701 cttatgtaag aattttgata aatataaaga attcaattgt ttgtatttta agataaagat  
23761 agaagatcct gaagtagcaa caaatgtac taactttatt ccaaagagaa aggaaagtag  
23821 aaagccttgt aaggattgta tatattacgt acgtaatcca aaggttaattc aagttaagaa  
23881 gaataaagtt gttttgata aaagatttta ttattgtcta cgccttaata agcaggggac  
23941 ttattttaga aaggtttaatt gtaaatactt tcagaagaa ttataaagga ggaagagttt  
24001 atgaaggtat taagtttatt tagtggaata ggagcttttg aaagagctat tgagaataaa  
24061 aatattgagc atgagatagt taattattgt gaaaaggata ggtatgcaag ttatgcctat  
24121 agtaaaacttt ttaggttatc tgaagctaaag aatttatggg atgttaattg ggttgatgga  
24181 acacatttta aagatataga tcttgaacc tatggcttcc catgcaccga tataagccta  
24241 gctggaagct gtaagggat aattaaaggt gaaacaaaat ccgggctgct atttgaagca  
24301 ctaaggatta tagaagaagc tagacctaag gttgcatag ccgaaaatgt tagaaattta  
24361 gtaagtaaaa tgtttatttc tgattttcat aatttaatta atgaattaga taggttagga  
24421 tataactcct actggaaaat actaagtgga attactata attcggccca ttctagagaa  
24481 agagtattca tagtcagcat caggaaagat atagacaacg ggagctttga gttaaagaa  
24541 ggaaataata atttagttac ctagaagagc attactgaaa gctttgtaga tgaaaaat  
24601 tattgtaaag ataattctta tttaaaagc ttcttaataa aggttaataa aagagtttgc  
24661 aaggataaag agcctagtaa attcggatta atgagagttg gaacaattaa aatccacat  
24721 atgttcaaaa tgaatagaag agttttctca gagctaggag ctagcccaac ccttgaact

24781 ggatctgata gtattcctaa gattattcaa tgcaaggta gaaaacttac tccttagag  
24841 tgctggagac ttgtgggatt ttcgtctgaa gattactggc tagttagaaa agctcttgaa  
24901 gaacaattht ataacgggaa agactgtact gatacgcaa tgtataagat ggctgggaat  
24961 agtattgtaa tccaggtagc agaaagtata attgaaagct taaaaggaat attatattaa  
25021 aaattgaggt gagaatattg gtgaaatatt attagaattht ctaaaagaaa ctctgattat  
25081 aaatagacaa gctaaattat taatagaaga taagaatagt ttatcttctt cagataaaga  
25141 aatgttgaat aaaattatat taaacacatc taaatcttha agtaagttag gttcagaaat  
25201 taatttatga ttagtthtattg tggcagagat tgtaatagct gtgttatgaa aaaagaaaag  
25261 atgtgtaatg gatgttccat gtgtgatgtt tctthttgta aatgtgggta aaaaagaaaag  
25321 cgttgatagg ttgtttgtcc taataaattc gttctthta cttagtaaa aaatactata  
25381 gtaaaggaac cttaatagg aaataaacct ttagatttac caatttatat acctgtaatg  
25441 cctgataaaa tcaaagaaaag thttaacttht aaggccaata aaaatataat tgctgttcat  
25501 ggagagttct thtaaatgc tgctggaagc aaaataacgg gggcatataa tccaggattc  
25561 agagctgcat taaattthaa agaagatcta tccggaatat tagaatttht tataaaggat  
25621 agaacattag aaggctthttg ggataatcga aatctattth ataaagactt aaaacgccag  
25681 gactthttag gaataatagc tcctaatttht tctgtthtattg aagatgctcc acgctggaa  
25741 catatatata atattcaacg ttctaaaatt gthttataatg aaatgatagc tgagggcctt  
25801 ccggtattc cggatatac ttggtactca aaagaagatc taaactthttg gataagagaa  
25861 attaaggcca ataataaaa aactatatct thtagthtca tgaatgtaga tactaaactt  
25921 aaagcaagta actcatggaa acactacttg ctaggattta aaattthaaa thtaaaata  
25981 cctthtagatg tagaaatagt ggttgtaggt atthcttcag tcaaagaat tgaggaaatc  
26041 ctthaaataa gthaaagtag aaaaatatct thtatgcatc aagctgcttg ggttaatagt  
26101 agaaatggag tatctgthaa agataaaaaa caactagata aatctatttc taaagatgat  
26161 atthtcaaaa ataacttaga atthttact agtgagtaca ataaattata tghaaaagtac  
26221 agthaaataac tgtacttctt thttattgct tcctaggacc aataaaaaata atagataagt  
26281 aaagaagtgt gthaaataat cttatgaaag gggagattaa thtatgccta aaagaagaag  
26341 caactatt gcaatacaa cggaaggatt aatgggtggc tcaggatcta atctthtcta  
26401 aggaataata gaagatttht ttaatgctgt taatggtaga ttagataata ttgtaactgt  
26461 acaaggatta tctaggacca gaaacagaat tgaagatata aatatagtht ctthaggtaa  
26521 taatcgatat gaagtaagtt caactgaagg aggaacttac atgttgata tgaatgaaa  
26581 tagctgtgaa tgtggccaat atgtthtatag aaatgaatgc tgcagacact taatagcgg  
26641 cagagaagct ttaggcgaag ttgcagaagt agatactata acaatgtag aaactactag  
26701 aagagctagg gatataagag atgaaataaa tagaaatatt cgtggggaag aacaagacga  
26761 taatcactth tatacagaca atgaagthtga thtcgataac gattthtcag aaattaatga  
26821 cgattctata gagtatgagt acgaaaacgt actaaacgga aataagagta cattggaggt  
26881 tgaactgaa thtthttgtg gtgatgctaa tgctatagca cgagaactct atgatttagg  
26941 tatagthtattg tctcttagaa gattaggcta tcaactcaaga agtgagccag gcaaatggaa  
27001 gcttgagaga gatggttccg tatccgatgg agatgccggt ggagaaatag thtctctat  
27061 thtthaaagat actcaaaga catgggaaca aataaaaagta atatgtgatg ttgcthaaaag  
27121 acatggggct agagtagatc aaaggtgtgg tggcatgtht catataaaca tggaaaaact  
27181 agatactgca agacaaagat ggagaagatt thtthaaagact atagaagtat atgaggattg  
27241 tatttataga gctgcaggtg gagatttagg aagagthaga agtaatgcta ggcattatgc  
27301 cactccatttht agtcttaggg ccgatgaaag taaatatata agattthata tggataatga  
27361 tgaagatgta agaagaatgg cagcagaagt thcaaaagga aatagatatt atggtattaa

27421 cttactaat atagcaagag atagagctcc tacagttgaa tttaggcatt ttaacggctc  
27481 attaatgag aagcaaatcc aggctaatat aaaaatggct gccggtataa taaatgctc  
27541 agaaaaagct agatttagag atactgaaga tgaaatttc aaaaagagag gaaatattct  
27601 aaagaatact tcaaggctag atggaacaca aactaaaaag aaaatgatgg agttttaga  
27661 cttacattt ccacgtagaa aagataaaaa tgcaatacta aatgtttta agaaaaatga  
27721 atggagataa tatacttta tagaaaataa tattataata ttacaagta ttacaataa  
27781 taatcattc tcttttatt aaactaaaat aacgaaagag ctctacttag taaatctaag  
27841 cagagctct tcaatgact ttattgtgat acaaaatgaa tatattataa ttataaaaa  
27901 tttataatta taaataaaga aaaaattaaa cgttttcta ttttaaaaat ttctaacat  
27961 aatagcctaa atttatatta taataattt aagcttttac tatgtaaata gccattttc  
28021 cttacgtaat ttaagaaaac aaagaaagtc ctacttaaaa ataagtagga cttctttgt  
28081 ttaacttag cactataca taaagtctt taaatattt aacttaatt tcaagaaaa  
28141 taaagagtaa tatattgtt atttattaag tttaaagta taattaaggt gtatcttta  
28201 agagtttta tatcataatt atagctttc acatttcaac ttataactaa gaaagtatct  
28261 attttagat actttcttt tactataata agtataatat ttaggagag tgattatg  
28321 aatgggcaa aagaaaagat taaggataaa aaggaatact ttttaagcca aagaaaaat  
28381 cctactggaa aattacaga aatgggtgtt agaacatatt ttttaatta taaacatgt  
28441 tctctaatg acaattttg tctagtaat aagataaatt ccaggattt agtcagcgt  
28501 gtgtatgaaa attttatga taataaaaca tcaaaccatg ttctagtgt ggtgatgac  
28561 tgtataata atttaataa aatgggctat ataaaatta taaaactaa tcatcacca  
28621 aagtgatgg tgaaaattga aaaaattta gattttatc tagatgggta agaagattt  
28681 tacttcaaaa aatataatat aactcaaaaa atagtataa aatatgtcta taaatataa  
28741 attttaatt ataaaaaga aagtattatt gataatact tctttttgt ttttaacata  
28801 taggaagtga tgatccttg atggtttaat aagaagaaag atactagcct tttacaatg  
28861 gaatgataa aatggttatt atactgacga acgatgtgac ttggaagaag ttcaaaaat  
28921 atcattagaa gaaagtataa aatattttt tggagtata aattcagagt tttattatc  
28981 aatagctgat aatatcttg agttaagctt ttacgaaaca ataaaatag ctaaagatta  
29041 taagttttat aatcaactt ataaaaagtt aaaattattg atagataata atcctaatga  
29101 aaatttatat agaaattac ttgaataaaa aaataaagtt acttaaaaat aagcaactt  
29161 attttagtg tttatata taaaggcaaa aagcaagaaa cttatagctt aacaatatta  
29221 tactttaat actaaaatta ataaagccag ttaataaata actggctacc tagatagatt  
29281 caagaactt caaatagtag aagatataat tttttaca taaaattaa taattatca  
29341 aaatattaat tttgataaa ataaaattgt taacatttt tgaattatat tttaaagag  
29401 cagtcaatt ttcgggatt tgagctgctc ttttactat taataatc tgcgattgt  
29461 ttttaaca aatataaat ttaatatct tggtaaaaat aaaagcataa acattcctgt  
29521 taaataagct attcactat aattccaac aatataata ttgtgagcag cataaaaata  
29581 atacactaac attacatc taccaagctt aattaattc atattgaaa aactaaat  
29641 acataaact attaacta aaataaatc cataatatc caatcccctt ttattatta  
29701 tcatgtaa atttatgaa ttactcaaa gctgcaatta tttaaagctg caagctctt  
29761 tattgtttt cttctttt tttgagctc tataatatt tttctctt cagtaaatc  
29821 aggtttcta cctgctccac gactattct tttagattt tctttaagct ctaaatatc  
29881 tcgactact ctactaaat ccattctact atctacatta aattcttat aattcctga  
29941 taatacatca cgataatatt cttcagttc tttatttta tttttaaac tctcaattc  
30001 tgataaaaat tttttgtt caaactcact attattcaat agtttaactg taaaataagt

30061 gttataacct tcatttcttc tttcatatat ttgaggtgtc ttttctattt taaaaagctt  
30121 tcttaattca ttaattaata ttcaacttc atcttttgag ttagtttcaa ttctaaatt  
30181 aaatccttct tggccataag ttgattata tgcttctct aattccttct tgaatattc  
30241 taaaacacta actggatag tattaactgt ataatatgat ttactagatc tgctgtaata  
30301 ttctcttita acgggtattt cttttattgc tccaatttta tgaagctgat ctattcttcc  
30361 agtattaaca ccataaaaat cagcaattgt ccatgtagga atgtatccaa acttttcaaa  
30421 cttattaata atagatcaa attctccagc tacaactaat ttatctataa ttttagatt  
30481 agcttctcta ggtttaaact ctattccata ttcttcagca agttttatta tttctgttt  
30541 tggagtgcc ttattattct taagttcatt tagaaaaatt tcttttaa atccttcat  
30601 atcatcacc tttatattta atagttaa tatattatat cataaattaa ttaatgaaaa  
30661 aaatctttt tcattaatta atttatgata taatcaaaa ataaagataa gtggggagga  
30721 aatggcagta tgatagtga tgataaatct ttaggtgaaa taaatcctga aagttattta  
30781 ataaaaatg ctaaagataa tacatatctt ttagcattac ctaataacct taatggat  
30841 aattattttg aagtgtacat agataaacta aatagaagta ttcatgtttt tgatagtcta  
30901 gagaatagaa aagggggaac tagtgctatt aatagtgtag atagaatatt agaaatagg  
30961 agaccttaa atttagatct tgactataag cttgtgatatt attaccaga tcatagtata  
31021 tttaaagctt gcataacaac ttatcatgaa agaaaaggat ttaataaaaa tagagactat  
31081 gtaacctata taccttttct gaagaaagct gaattattc taaaaaatag attttaatta  
31141 gagcttttag ataaaactat attataatta gagtataact attgaaagga gtaaattaaa  
31201 atgggtgata gaacattact aaatccacaa atagattttg tgttataaaa gatatttgg  
31261 acagaaaaga ataaacctat attaattaac tttttaaagc cagtaataaa accaacaact  
31321 cccataaaaag atgtagaaat caaaaataac gatatagata aagattttat agaagataaa  
31381 ttagtagat tagatgtaa ggctacaact agcaataaag agcatataaa tattgaaatc  
31441 caggtaaaga atgaatataa catgatacaa aggaccttat attattggag taaaatgat  
31501 tcagaacaaa tacaataatag agataactac agtaagttag aaagaactgt ttgtataat  
31561 atcttaaat tcaaatattt aaagaatgat aaatatcata atgcatatag gctaaaagaa  
31621 ataactcaa atgaagagct gacagatctt caagaaatac atttcattga attacctaaa  
31681 ttaaatgaaa tccgtaataa agagtatggt gaaaatgttg agaaaatgga tgcttagaa  
31741 aatgggttag aattcttagt tgaaccagaa agtaatactg taaggcagtt agaattaagt  
31801 aatgaagaaa ttaaactagc aaaatctgaa ctatatagac ttagtatgga tagtaatgaa  
31861 agagaacagt ataatatgag agaaaaggca atatacgata gaatatctgc ctagaaaat  
31921 gctgaagcta aaggaaagat agaaagagaa ttagagttaa taaaggagtc ttaaatcaa  
31981 ggattagaaa taccctaat ttctaaaata acgggattaa gtgaagaaga aatattaaa  
32041 ataaaaaaag atatttaata aaggaggaaa tagtatgaat ataattataa tatgtgctat  
32101 tataggtgga ttaatgggat acttctatat gaatagaaag cttgagaaaa aaacaataa  
32161 ttagtaatat tttgtgata actaaaaag actctataat ttagagtctt ttttgattt  
32221 aattaaattt ggataaatat aaatataaaa atattgaaaa aaaataaaaa aaaatatata  
32281 atgtagttat gctaaaatat aaacatgaaa aatataaatg taaaggtgtt gtaaatatgc  
32341 gcaagaggt aatttttaata taaattaact gaataaggat tatttttaa agtatatgaa  
32401 aaatctgaa taactcaagg tttattgtg gtggaatcaa ttattataa tattgatatt  
32461 accatgttta tttgtgtact ctaaaaataa tcagtattat aatgagcatg ttacatctt  
32521 attgacagga taggaaaacc gtgttctaaa cacggtattt ttatgtctat tttgctata  
32581 tatagatatg gtataagatt ttaatttgaa tagcttaatc ataagttata taattaaagt  
32641 tctatattt atgtttatat ttaggttata tgattatgag gctgtaagt aattatgtt

32701 attgcagct ttttttgtt taaggagatt atttgatga tttatatatt taaatatgaa  
32761 gattatgaaa aacaaacaaa tttttaaga aatactagga tggatgat taatggtaa  
32821 taaactttca gcatataaaa cttatttatt atttcagct attgcagcaa tgtgttttc  
32881 gttagtagct acagttatgg tagtgtatca cattgaaata gttcatttaa atccacttca  
32941 acttatactt gttggaacta ctttgaatt agcatgcttt atattgaaa ttctacagg  
33001 tatagttgca gatgtgtata gtcgtaaact atctattggt attgggggag tttaacagg  
33061 agtgggattt atttagaag gttctatttc tagttttgtt ttcgtacttg tagcacagat  
33121 tgtatgggga ttaggttcta cttttatcag tggctcgctt gaagcttga ttgcagaaga  
33181 agagaagaat aaagatttag atgaaattta tataaaggga gcacaagcag ggcagatagg  
33241 agcatttatt ggaatagtag taagcactgt aatagctaat ttctctgtaa ggcttccat  
33301 tatagttagt ggagttttat ttataattct tgcattattt ttatggttat atatgccaga  
33361 aaataattt aaaccatctg ctctgggga tttaaataca ttcaaaaaga tggatatac  
33421 atttaaatct ggtcttaaaa ttgtaaaaag taaatctata attatgattt tacttgagc  
33481 aactttattt tatggattat caagtgaagg ttatgataga ctttctaatg cacattttt  
33541 acaagatact acacttccta agcttggaag ccttagttca gtgacttggg ttggaattt  
33601 tggaaattta ggaatgatat tgagcttcat agtaatgcat tttatggcaa agaacttaa  
33661 gaatgaggat aataggaaaa atggaaaact attattatgt ataaatatac tttatatatc  
33721 gtctatgttg atattgctc ttcaaaaaa ctttagttta atgttaatag cttatttggc  
33781 aacaaatacc tttagaatta taaatgaacc tatattcagt gcgtggtaa atggcatat  
33841 agatgataac tctagagcta ctgtactttc tataaatgga caaatgaatt ccttaggtca  
33901 aatttaggt ggaccaatta taggaatcat agctacaaat attcagtaa gtattggtat  
33961 agcatgtact tcgttattag taacaccggt attagtgtta tatattgttg ctatgataat  
34021 tgataaaaag gtggatgata gagttggagg tattgattat gaagaaaata attaatatag  
34081 gaatcgtagc acacgtggat gcaggaaaaa caactataac agaaaactta ttatattata  
34141 gtggagctat aaaatcagtt ggaagagttg atttaggcaa tacacagacg gattctatgg  
34201 agcttgagcg taagagagga attaccatta aatcgtcaac catatctttt aattggaata  
34261 atgttaaggt gaatattatt gatactccag gacatgtgga ttttatttcg gaagtgaac  
34321 gttcattaaa tagcttagat ggagcaatac tagttatc aggagtagag gggattcagt  
34381 cacaacaag aatattattt gacacattaa aggagttaaa tattccaaca ataattttg  
34441 taaataagct agatagaatt ggggcaaatt tcaacaaagt attgaagaa ataaagaaga  
34501 atatgtcaa taaagtagtt agattacaag aagtatatga tgtaggaagc aaagctggtt  
34561 atataaaaa actattttag acatgcataa taaatgatga tgctattaat gttttatcag  
34621 acttagacga agcattttta gaaagatata ttggtggaat agaactgat aaagaagaaa  
34681 tacaagaaaa gctttcatta tatgcaagag aaggagctct atatccagta tttgtggtg  
34741 ctgcagcaat tggacttga attgaagatt tattagatgg aattttagt tattttccat  
34801 ttgcaagtaa tgatttgtaa agtgatttat ctgggtagt atttaaaatc gaaagaacaa  
34861 gtaaaaatga aaagaaggtt tatgtaagat ttttggagg aaaaatatct gtaagagata  
34921 aaattcaagt acctaataag gagatagcag aaaaagtaaa gaaaattaat aggttagaaa  
34981 atgggggaggt tgttgaagca cagaggatag aagcagggga tataggtatt ttatatggac  
35041 ttacaagttt ccaagtggga gatgttattg gaatttcaa tgataaaatt aaaaatata  
35101 ctatagctaa accagcatta aaaacaacaa tttctgcaat tgataaagaa aaaaatccag  
35161 agctatttaa agcattaaca ttacttgagc aggaagatcc actactagaa ttagagatga  
35221 atgacataga taaagaaatt tatgtaaact tattcggatg agttcaaatg gaaatactaa  
35281 gttccatggt agatgattta tatggaataa aagtagagtt ttcgaatatt gagactatc

35341 ataaggaaac acctaaaggt tttggagcgt caataatgca tatgcaggaa gacttaaatc  
35401 cattttgggc gacagtaggc ttagaaatag aaccagcagg gagaggcgaa ggtcttaggt  
35461 atatttctaa tgtttcagta gggctattgc caaaatcttt tcaaaatgca attgaagaag  
35521 cagttattaa gacaagtaaa caaggattat ttggatggga ggttacagat gtaaaagtca  
35581 ctcttagctg tggngaattt ttagtccag ccagcactcc agcagatttt agaaatgta  
35641 cacctatggt attcatggaa gcattatata aagcacaac tgttttata gagccattac  
35701 atgagtttga gttaaagatt cctcaaaatg cttaagcaa agcggatgg gatttagaaa  
35761 ctatgagggc aacctttgat aatcctattg ttatagggga tgaattctca ataaagggat  
35821 taattccagt agaaaattca aaagaatata aatgaaaat agcttcatat acagaaggta  
35881 gaggaatgtt tgtgacaaaa ttttatgggt ataaggaagc ttcagctgaa tttcaaaag  
35941 cacgcaaaaa aacaacgtat gatccattga ataaaaaga gtatttgctt cataaactac  
36001 acgcaattag agattaaatt taaatagata agttaattt ttatatgtag gatttaata  
36061 taagacattc aaagcctaaa agtaaaggaa gggctcgtctg aagaagatga agacccttc  
36121 tttttcatg ttactatgct taattgtaag tgcttgaat ttgtaataata atgtaataa  
36181 agtttttaat aataagggga cggcacaat gaaaatcgac ttaaaataa caaagatga  
36241 ctatataagc ttcaatttaa atcatttaga aaactcgaat tcacagaaaa gtacatttaa  
36301 catacttaga tatgctgtac ccatagtact ttctatacca atctactta caggaacggg  
36361 gatatttaac caaccgagta tatattggat tatagtagcg atagttttt tagtcattg  
36421 gattttaaca tatcctaagc aatacaaaaa attagtagct aaagaaactg ataaactcat  
36481 aagttaagga gataattcat caatatttgg aagtaagact ttagaaatta ttgatgggac  
36541 aatagtagta aaaggggatt ctatatcaga aacagtatcg ttagaaagta taaaagatg  
36601 aaaagtttac gaagatatga tccttatata taagtggatt ttagctcat ataattcaa  
36661 ggagatattt agataaagaa atagagaag aacttatgaa agagcttaa atagtgaag  
36721 ctttagaaca attaaagtaa aacgtgctcc tttggaggtg taacagagaa ccgtaccaca  
36781 agtaaggtag cgcgatgat aagaataaaa atttatatat ataatttaga tcttagttat  
36841 acttaaaaaa taattagtag gataatatat gtatagataa tatcgataaa agtatattac  
36901 taaaaattat aattgttagt atgaggagtg attatacatg gatagctta ccaattcaa  
36961 taaagttatg gagtatatag aaacgcattt agaagaagaa atagacttta ataggtttc  
37021 aaagattgca ggagtatctg agtatcattt tagaaagatg tttcgtatc ttcaggtat  
37081 gacactttcg agttatataa gaaaaagaag gctatctaaa gcaagtttg atttaatgca  
37141 aaaagatata aaaataattg atatagctat aaaatagga tatgattcag cagatggatt  
37201 tagtagggca tttaaagaat ggttgggtg gaatcctca gagattaaag atgctaagaa  
37261 tcttaaagta tttccttga tgactttca attactatt aaaggaggaa gtaatatgaa  
37321 ttatcgtatt gaaaaaaaag aagcttttaa attagtagga gttaaaggtc aagttcctat  
37381 tgtgtttgaa ggtataaatc aagaaataat gaaaatagca caaagtataa cagaagaaca  
37441 aagaaaatta ttacaatcat atagaaatga agatgttaa actgttgta acgcttcatt  
37501 tgattttgat gataaaaggt atgaagaaaa aggtaactta aatcacttaa ttggatctat  
37561 aactacttta gatatagatt ttggtgaatt tgatgttga gaagttcctg cttgtactg  
37621 ggcaattttt ccttgtaaag gaccatttcc aactgtattt caagatacat ggggaaaaat  
37681 ttatctgaa tggttgccat ctcaaatga tgaattaata aacgttccag aaatatctt  
37741 caatagagat atgtcagata tgcaaatgt ttatagcgaa atttggattg gggtaaaaga  
37801 aaagtaatta gaactgaaat tttattctat atcacagta aaggtacctt gaataaatta  
37861 aggtgccttt tgactctat ttagaataac tattaaggaa ccttatcata aataaatgag  
37921 ttttttga aagtattgat attactcaa tagtagctat ttttttcag aaagtatag

37981 atcataatca ataattaagt attaagaaaa ttagattcaa taaatctaaa tataactgat  
38041 aattagtaaa atatataagt aaataagat tctaatcagt gtattaaatt tggatatttt  
38101 tatatagaaa gtattgtaa taatgaaact atacttaaaa taaggtaaag ataacatggt  
38161 taaatacca atattgtgtt aattttaatt attataaaa ataattaaa aaaggttgca  
38221 attaattaaa tactatgtta ttataaaaga gtagcaaagt tgctaacaaa aaaagtttca  
38281 ttaggtaaa tagtttctcg aaaattagag attattatat caatttagaa tctttaattt  
38341 taggaggaat gtttatgtca gataaaacat taaaatgcag agattgtgga agtgaattcg  
38401 tattttcagt aggagaacaa gaattctaca aagaaaaagg attgaaaat gagccaacaa  
38461 gatgtatatt ttgtagaaga gctaagaaag acaaaaatag aagataattt tagattgta  
38521 taggtttag tttaaactac aaccttttt agtataaaaa aataaaataa ctattgtaaa  
38581 aacctactt aatgctgata cggagaaccg tatcacaagt aagtgcaac ttacacaaa  
38641 ttggatata atatgaaagg taggtctgct ttaattctgc aatgaaactc acaaaaatct  
38701 aaaattgaa tttttgtag ttatttagt ttattcata gtttctctg tttcaccta  
38761 ttcagcaaa ttagaattg tttttctaa tctatagat tgaaaaaat aaaagttat  
38821 atataatgta attatactaa aatataaaca tgaaaaat ataatgtaaag gagatgtaa  
38881 tatgcaaaa gagttagtt ttaactaac taactgaata aggattattt taaaaagat  
38941 atgaaaaaaa tcttgataa ctcaaggttt atttgggta gaaacaatta ttaataat  
39001 tgatattacc atgtctattt gtgtactta aaaataatca gtattataat gagcatatta  
39061 catctttatt tgaagaatag gaaaactgtg ttctaaacac ggtattttta tgcctattt  
39121 tactatattt aaaaaaat caagtttaga ttatatatgt ctacctagt aacttaata  
39181 agtttagaac aatttattga attatcaaag ttaatatataa cttacaatgt atctataat  
39241 ccagaaat atactctac aatagatta aaaaaatta tagatttggg taaagataaa  
39301 aatataaatt gtataatggt tccttaggt aattcggtt aagaaaaagg gatattgta  
39361 aaaaatttca ttaaaaacaa taaataaaag taagttttta tataattttt ttctacttt  
39421 catttttag tttataaaag ttcacctta taaactttat ttaatttatt tattttctg  
39481 ttttaaatgt atataattt attttaaac gtttataaa atctattgat ttaataaac  
39541 gtttttcta tacttaaagt aataattta atattgagtg ataaaaatgc gttataagt  
39601 gacttatgta tatggtgact cagatcaaaa atttactca accttagca gtaaagtct  
39661 tatggaaagt tatattgaaa caggtaagga taaagatta cgggtaatta atatagaaag  
39721 tagtaaactc tatggctatg caaggtaag ctctaaagag caaaatttag atagacaaat  
39781 agaagccta aaggagtatg gtgtaaata aagagacata ataactgata agcaaagtgg  
39841 aaaagacttt aatagagaag gatataaac acttaaagag cagctattaa gaagtgtga  
39901 tgttttagtt ataaaagagc tagatagact aggtagaat atggcacaaa taaagaaga  
39961 atggaatgat ctgcaggcaa aagagataaa tatagttgtt atgatacac ctatactaa  
40021 tactgaaggt aaaagtaatt tagaaaaaac ctaatatca aatatagat ttgaattatt  
40081 aagctatag gctgaaaaag aaagagtaa gattaagcaa agacaagcag aaggtattgc  
40141 taatgcaaag gctaaggaa aacatttagg taggccaaga gtagaatatc caggtaattt  
40201 taaagaagta tatgacaaat ggaaagctaa aaaaactact ggtgtaaag ctatggaact  
40261 aatgaattta aagaaaaatt cttttataa cttataaaa aatatgaaa ttgaaaaata  
40321 agaaaattaa gtaatttta tatgtttca aataaaaagc ttagaaactt atttagtaat  
40381 tggtaattc caataattt agcaatttt cttgctgtaa ttattaataa attatttat  
40441 acaaatag agttcctagc caattaatgt cccaacatt aaaagttgga aatcaactat  
40501 ttgttacgaa agtttataat acttcaaata taaagagagg agatatttt gtcttaatt  
40561 ctgcaagaaa aaataaggtt aatattttt attaacctta tttttctg cagaataaa



40621 aaccaatta atattactta taataactaa tattataagt aaaggaatcc ataaaaat  
40681 aggaatcatt attaacataa taaatcctat aaccaaaatt attattgaat atatcaata  
40741 tctaagaaat agtttcaaat aatcacctac ttaaaattaa atttattatt aatttaatta  
40801 atctaaaaat caacctttct aatattataa tcttctttt gataaattaa cataattcta  
40861 gataataatt cttaaaaagt atctttattt aaaaaatggt aaaaatttga tataatagaa  
40921 ttgtaaaaaa aattcagggg ggaaaccaa tgaaaaaatt aatagtaaaa agtacaatga  
40981 tgcttttatt ttcttgctta ttatgtttag gaatacagtt acctaataca gttaaagcaa  
41041 atgaagtga taaataccaa tctgtaatgg tacagtattt agaagctttt aaaaattatg  
41101 atattgatac gatagtagat atttctaaag atagtagagc tgttactaaa gaagaatata  
41161 aaaacatggt aatggaattt aaatatgac ctaacaaaa acttaaatca tatgaaataa  
41221 caggttcaag aaaaattgat aatggcgaaa tttttctgt gaaaacagag ttttaaatg  
41281 gtgctatata caatatggaa ttacagtat catatattga taataatta atggtaagta  
41341 atatgaatag aatatcaata gtaaatgaag gtaaatatat tcctacacca agtttcagaa  
41401 ctcaagttg tacatgggat gacgaattaa gtcaatata tggagacgct gttagttta  
41461 cacgttctag taaatttcaa tatagttcta atacgattac attaaactt agacaatatg  
41521 caacttctgg atcaagatcc ttaaaggtaa aatacagtg agtagacat tggatgtggg  
41581 gggatgacat tagagcttct caatgggtat atgggtaaaa tccggattat gctagacaga  
41641 taaaattata tctaggttca ggagaaactt tcaaaaatta tagaattaaa gtagaaaatt  
41701 atactccagc atcgattaaa gtatttgggtg agggttattg ttattaaaaa aatgaggcta  
41761 cgcctcattt tttcttttga ttttaatat ttaataata taaaaaccta gaatggatga  
41821 tattattcta aaaattgtta aatcaaaatt aaaagaatga aatgtaaca atgaaataat  
41881 aacattaat aataaaaaa taattaaact tggttttaga gaattatatt tatttataac  
41941 aataggtatt aaaataccaa aaggataaa taataataga ataaataatt gatctaatac  
42001 aaatacatta tctaataacg gtttattact attaaataaa ttatataaaa atttaaaagg  
42061 taaatatgca ccttttgata aatagccacc accattagta gtattggaaa taaaattaa  
42121 aataaatata gtatatattc ctagaataa agatgataaa atcctagat ttattagatt  
42181 tgctttaaga taagactct tagtagaatt tataagtca tctatctgaa gagtgtaat  
42241 tacttttca tttagcttct ttcagaaaa accttcattt aaaaaatcct ttttcattc  
42301 ttctgcggt tcaagtaact ctaatttaa ttctgataat tctctagatg aaatatctaa  
42361 tttcctaat tttttattha aaagtctttt caatgtcata ttttattcct ccttaattt  
42421 ttctattaaa ttgatataa gataaaagtc ttaagtttt aaatttaatt caattaaacc  
42481 agcttcagta atttataat attttcttt tttcttgaa ctattagttt caatgaata  
42541 atctgtatt aattttttt ctttaattt ttaagtgtt ggatataagg ttcttcccc  
42601 taatattaaa acattatcag ttatgtttt aatttctta gatattcat atccatacat  
42661 atctttattc ttaataaag atagtaaaa tatttctaata gaaccttta atattctct  
42721 atcaaaaaa tcaactcct ttaagttaat ttatgttct ataatttaatt tttacgaaa  
42781 cataattgc tttacaaggt attaattaaa aaatatatta tattttttaa ttaatttcag  
42841 aaaatactta aagtattata atttatataa aaaagttaa gcaaaaagct ttaactttt  
42901 tatttctgag ttataatgtg agtaaaaata ttgagaggtg tattaagat gaatttagt  
42961 aaaacaagag atgatttga aagagaagct ctagactaa aaaaagagt gatacaaaaa  
43021 attgatagta tagatgatgc aaatagaaaa tatgtattag ttttgatga tctagtattc  
43081 gaggcagacc atgaacagga tattacttca agactaataa gagattatat agaaactgat  
43141 gatagaaata tgcagcttct attagaatt gactttgcaa gagctttaaag tatgtatagc  
43201 aataggaatg gaattaatgt tgaagtttat aataacggta agaaagtaag agataactat

43261 gctgtatctg aagatgatcc ggattatgaa aaggactatg aaattcctga tgtaatcctg  
43321 gatgtatttg atgaatttac tcttttaag ggccttaatg aacttaagta tgctaaaata  
43381 tactataagt ctgatgatgg agagtacaag ctattttaat ataaattaa ataaagaagt  
43441 agctttaagt aataaaaagc tgcttctttt ttataagggtg aacatagtaa aaaagagaa  
43501 caaatatata catttttaag agattttata aaagaaaaag gatatacaacc tacgggttaga  
43561 gaaattgctc atgcagtaaa tttaaagtca tcgtcttctg tttatagaca ttagaaatg  
43621 ttagaaaaag atggactcat aatacttggg aaaagtgagc agagaggtag aaaaagaagt  
43681 atccatatta ttgatttaa caaaaagatt aaaaaaatg tatcagaaga aactattaa  
43741 aatttaatta aattttcaa aaaacaagtt aatactaata atgatgtatt tccaagaaa  
43801 gttactaatg attatatagt aactgtagat aatatacttc ctgatgacat tattattatc  
43861 gagaaagtaa attctctaga aaaggatagt ataggattat tattatttga aatcataacc  
43921 ttataaaaa aatatatttc agattatgaa aaggatatg atactgatcc tgtagttta  
43981 gggaagatta ttggtgttta tagagatttt ttctgatatt acttgaaaa acataaaga  
44041 aacgttaaaa taggttaaca atattaaaat ttactgtaat aatgtattag aaactttcga  
44101 gtttatcagt cactagttaa accagtatta actattaaat taattgcaaa cttaatttga  
44161 tctgtatata tattaacaca aaaaagatta tctctttaat ttagagata atctttttg  
44221 tgtttagaat taaccaagaa tattatacaa ttaattata tcctatactc atagtaatta  
44281 taaatttggg tgagaaaatt tatgagatta tcagaagaag ataagaaatg tataaaaatt  
44341 ctttatagaa atggcttaaa tgtaaaagaa attgaaaaat tattaataa tgacttttct  
44401 aaagacgcta ttcaaaaaa tatatataga catttaaatg aatttaggaa tgaacatatt  
44461 ataaatagat ccttaataa aaataaatta aagaaagaat ttaaaaatat tattaagaat  
44521 aatttttaag aaaggatttt ccataatttt caagaatatt atttatatat tcttaata  
44581 gggggagtta agatatgaaa acagctcaag aagtagcaa tgaattagat ttaaccagga  
44641 ctgaagtta taatttgctt agaaaaaaaa gattttctcc attagttaa aagaacggtg  
44701 gtcaagtagc gataagcaat gaactttca aattattaga agaagaaatt aaaaataaaa  
44761 gaaataatat taaaccaca gagaataaaa atatagatat aaaacaagaa gataaatcat  
44821 tagaagaaa aaatactata gttgatgtaa aagctgaaga aaatcctgat ttaatacta  
44881 tagaaattct acaaatcaa ataaattaa aagataatca aataactatt ttaaataatg  
44941 ttataactaa taatttaag agaataaaag atcttgaaga aaaaaatcat gagttaaag  
45001 aattacatga agaagtcaat aatttaagga tggttattga ttcaatacaa actaaaaaa  
45061 agagaaaaag acttttagga atattttaaa agagaagggt aattataacc ttcgagactg  
45121 tagggaaatt tgtgtaaaaa caaatttccc tacagttttt ttgaatatt agctgaaaa  
45181 tttggaataa tattcttaat atttaagga ggattcaaa tgagtaaaga aatcaattat  
45241 caagaagaaa ttaaaaattg taaatcagtt gaagatttag ttgtaagaa tggattaatg  
45301 aatagttaaa ttctttatga accataaaaa ttttttcttt agtaaaaacg attgcaacat  
45361 attaattaa gtggtattgt tttcaaggga taaatcttct taatatctac actttacata  
45421 ataaagacta atgatctttt tacacttaat taataggagg tatattaaat ttatgttaa  
45481 aaaagttaat tttcactc atacagagag atgtagacat gcagttggta aagataggga  
45541 atatattctt gaagccatag aaaaataatct tgatattttg ggttttagtg atcatggacc  
45601 ttatccagat aatagattta gattaagaat gaattatatt gatcttttag aatacagcga  
45661 tacaatgaat aactaaagg atgaatttaa agagaagatt aactaaaga ttggattaga  
45721 aattgaatat atttttacag aggattttta ttataaatat ctctataag aagtaaaact  
45781 tgattaccta gcattagtc aacacgtatt ttaactaat tcaggtgaat taaaagatac  
45841 ttattttta aagagcaaa aagattatat agactatgct gaaagtatt gtaaaggcat

45901 gaaaagtggt tattttacat ttatagctca tccagactta atatttttaa atgattttcc  
45961 atgggatgat aactgtgaaa aagcttgga ttaataata gaaacggcta aaaagcaaga  
46021 ctaataactt gaatttaag caaatggatt aaggcgagga ttaagaaatt tttatgatgg  
46081 aaaaagatat ccttatcctc ataaaagatt ttgggaaaaa gctgcttcta agaaaataaa  
46141 aactttaata aatgctgatg ctattcacc taatgatatt tgggataaaa aatggacga  
46201 agcttattct attgcaaatt cattaggatt gaatttagtt tataatataa aataattatt  
46261 tatatttaaat tttatttag tatagataaa atcaaccatt ttacataata ttataaactt  
46321 aaggaaatct gataaattat acgtgttata tcaagtttc ttaagttat atatgtatta  
46381 aaataaatat atgaaagtta ctttaataata tatacttagt taaaaaagaa cttattttta  
46441 aaaaaatata aatttctttt aatcattta ataattcaat tcaatatta tctaaatact  
46501 catctgaaat tttcaaaaaa tgatctgtat tattaaaatt ataaaaaagt aattctagtt  
46561 ttaagatac ttgaaataca atcatagaaa aatactcttt aatatcttaa aattattaaa  
46621 tttactgata atatatgaag atataatcaa atttattttt aattgaggat ttattactac  
46681 atttatggta tttcatcatt gcatatcaca atatttatta aatttacaac aatatacata  
46741 aataataaaa aaataacatt aaagtttatt tattgtattt tttatggtaa tatattacta  
46801 taaaaaaata ttaaaaggag aatttatgaa atctaattat gatgaaataa ggcaaatttt  
46861 aatgaaca ggtatagata caaaaaagaa tacaattat gacaatttag aatagattc  
46921 aattacaata atagaattga tattaaggat agaaaaattt tatggaataa ctatattaca  
46981 aaacgatata aaaaatagaaa attttcaaa tgtaaacgct ataaataatt tgcttttaa  
47041 gtatttaaaa aaagaaactg atgaaagcat tgaagctaat gaagaattaa atttttat  
47101 ttaataggag gaagtatgtt tataaaaaagt gattcctcaa aaggcattaa ttataattt  
47161 gaaaataaag atatatgttt aacagaatgt ttatttatag gtctatcaa aatcctata  
47221 gagaataatt ttttaatta taaattagat aatatattca ttaataataa ttttaaaatt  
47281 actgaagggt agtacttata ttaataaat aaagaaaaat gtctattgaa atattttct  
47341 aaactgaga gattcaatgg aaattattat agaaaatcat tagattttc agaattta  
47401 ttaaaaaaag atgaaagaat tttgcgttt ttaataatta attctaataat tgatagaaat  
47461 attatttaa aataggttag atccaatgat ttaaaattat ggttaataa tactcttatt  
47521 tataataaat catctataat atataatgaa ttttatgaat caactggatt tagtgattca  
47581 atctcataa atttaaaatt aaataaagga gataattta ttttaataga attaaataa  
47641 aattctcaa tgattcatt aaaattatct aaagataaat atgataatga attaaatgta  
47701 ttaaaagatt attatgaaag tacttgttta aatagaattg gtattattca tcaccaaac  
47761 ttatgtatta atctagataa atacgaattt atgataatac ctaaggatta tataaatatt  
47821 gatctaaata gtgaattaac aataaaaatt atatttaaaa ataattgtat tagtataatt  
47881 aatcaaaaat tttataaaaa aatataaatt aatattttag aatttaaaaa tagtgacgaa  
47941 tgtattatga acattgaagt tatatttta actaaaagta atattaatat gatataaaa  
48001 ttaaagggtc tgttacctaa ttattgttt ttaaagagta attcaaaagg atatagaaat  
48061 aatattatta attatttga tttataaag aaggatattc ctttagaaat gattccatgg  
48121 ataatttctg aagaataata taaaataata gatttaagta gtattacaag ttatttatta  
48181 gatactagtg gaattcatag gatattttc acttcaaagt tagacaatac tcttcaaaa  
48241 atttgtgtat ttctaccgga agattattct agagaaaaa gttattcaat agttgtacat  
48301 ttagcaccgg cagtatcggg aaattttata aagttcata gtcagaagtc ttataaatct  
48361 aatgtaattt ttgtgaaat ttcaactagg ggcgtaacac aaggaagtta tataggagaa  
48421 tatgcaatat tagaaaatat aaaaatttta aaagagattt taaaattaaa aaaaataact  
48481 ttcaatttta taggttattc aacaggtgca tttgcagttt gggcattagc agaaaattat

48541 cctgatatgg ttaattctat tgtaacaatt tctggtttc cttattatag aaacttggt  
48601 aacttaacta atataccgat tttaaatata tctggagata atgatgatat gattaaaga  
48661 tcatttgaag aaccaacca tttctttaag aataaaaatc cacaatataa aggattatta  
48721 cttaaagaag cagatcatct tacaatcatg aacctctat ttagtaagta tgtataaat  
48781 acattaataa acagaaatcc aatgaaatt atcaatgtat catttaggac tgaagaatg  
48841 agacataata aaacaaaata catagaaata ttaagttata aagattatta tggaaaaat  
48901 gatattgagt ttataatga acaaattaat ataatattg aaaatattac tagttttata  
48961 tttatgttc ctcaaattt taaaaataa aaatttgata ttatataat aaataaat  
49021 ataaagcaa aattcactat aaaagatact gataaattat tgtttaaata ttttaaaat  
49081 agatttatat taattgatga agaagtatta gaagttaatt taatagataa tattaagga  
49141 atgggactgt tagatatata tatggatagt attaaaatata ttttcggaa tactacaaat  
49201 gatgaagtc gcaaaagtat gtataaagtt gcaaaaacaa tgtcaaat taaaacaatg  
49261 ggatataatc cgaatgttaa tgtaattat aaaatagaat gtatagatta tttcataaa  
49321 gataattatt gtaacgataa cataattcta attaatgaag gagaaaataa ttttttgaa  
49381 gaaataatc acaaacttc tattaaacg tattgcaatg ggttttata taacgatgaa  
49441 tttatagaag gtgattattg tatattttt ataactaaga atccatataa tgataagaaa  
49501 aagattctta tcatttttc acaaaaat gaactattta attctaata tttttaaga  
49561 aattttataa taccaagtta ttcaatggg ttaatcaat ggttaaatgg agacgcctta  
49621 atataaaag ataaagaata tatagtaatt aattcgatag gttgtccgat taaatttaa  
49681 taatttaatt agataaatg agaggtttt taattatgga gaaacaactt aaatttctaa  
49741 cttctggtt aataaaaagt taccaatatt atgcgtatcc tataaatata atacttcaa  
49801 aatataataa acaggaagat aaactgtat taaattttt tacgaatgta ttagaggaa  
49861 agagtatgca atattatgaa tcaaatatc aaaaatggga ttgtttat ataaaaaat  
49921 taactgtata taaaatttg ttataaatc aattaatgaa attaatgat gataatatt  
49981 atattcatat tacaaaagtt aatgagtatt atatacctaa tagaagggcg ttaataaat  
50041 ataattatat acatgattg ttgtaattg gatacaacaa attagaagaa actttttaa  
50101 ttgcaggatt taatgaaat aataacttta tgaactga agttaaattt actcaaatg  
50161 tatcttctg tttttatgaa tctaattata cagaattgat ttaatatct gtaaaggaaa  
50221 attataatta tattataat actaataaaa ttaaaaaaga acttaaaaga tatatatcat  
50281 gtgaagttt aaatatgagt gaatatcaat tagatgaata tacgtttgga ttgatgcat  
50341 aaaaaaatt aaataaagat taaaactat attcagaagg taatacagat tcaatgccg  
50401 gaatcattca agatataat tttatataat aacataagca aataattat tataaattc  
50461 aatatttggt tactaataac ataatccctt tagatattt agaagagttt tcattaata  
50521 aagaagaaag taatataata aaaaacttat ttattaaatt tattattaca aaaaattcta  
50581 attataataa aagaataagt ttaagattg atagctgtt aaaaaagaa gaaaaaat  
50641 taaaaaact taatttaata atctagtaaa atttatata ttaatcaata aaataggtg  
50701 aaactttaat ttttagattt attaaaagtt tataataata gaaattcggg ttagaaagaa  
50761 taaagactaa agttttataa cagtaaagaa aaaatatgta gtaatacct tgattataat  
50821 gaacaggaat actaggtaaa caaatagag gaaatataa aaattttt cagagaaacg  
50881 agtggtgata attagaaatg ttaagaatt cttaaaatt gaaaaatgaa gctaatacat  
50941 tattagaaag gattgaaatt aaaaaatata tgagtagata tacaatgaa tactgtttg  
51001 tgggtagtta tgctaacaat actatggtat ggagagatata tgatatatgc tttatttaa  
51061 atgaaactaa tattgaaaaa tttttaatt taggtgtga gttagccaat ctatagggg  
51121 tttgtgctat gaaatttaatt aatgattta tacttaatcc aataaacct gatggattt

51181 attggggaat agatattatt gataaatcca atggggaatt atggaaaatt gatataaagg  
51241 gagttcaatt agatacatat attgacatta aacgttatac agaagagttg attactaagc  
51301 ttgattttga gatacaagag ttaatagtgg ctgttaaaaa taaattgttg attagagata  
51361 gtagatataa tagatataga acacctcatg gaagtagttt ttatattat gattaatag  
51421 ttaacaaaga gattagaaat ataatatag tattaanaaga attgaaaag attggaat  
51481 attagtagtg acggaggaag tatggaagta tactatcaat taataaaagt agcaataaaa  
51541 aagcagttac aatatagtaa atcgattatt attttttta ttgtaaattc aatgaaaatt  
51601 atgttatatt atacgctttt taatgctatt tataaatata atgggacaag tgaatttta  
51661 ggttatacat caacgcaat gatttggtat ttggattac tatcagctac atggcacta  
51721 attggagtt ctattgattg gcaactttca acaagtatta taaatggaaa tttgcaatg  
51781 gagctctaa aacctatc tatattttcg agaggattat gtgaatctat agggacaagt  
51841 ataattagtt ttttactga attttattg ctacttttag ttcagagctt ttttatatt  
51901 cctaactttt taaacttaat ttctattata aatatattag tattgttagt attgcaatt  
51961 attatgaatt atctaataaa ttttattgt ggaatagctg catttggtac aactaatatt  
52021 aatcagtta taaactcaa atttatgctt ttgcagttt ttggtggatc atataacca  
52081 ctaatttct tgccagaatc tatcaagaat atttcttgct atttaccgtt ccaatatata  
52141 attactggc caatacaatt tttctcaat actgaagaga ctagtgaagt aaaagtattc  
52201 ttatagtaa ttataatca aattttatgg atactagtgt tatatattat atatagaata  
52261 ttatggaaaa aagcaatcaa aaaatatgta tcttttgag gctaataatgg agaagtata  
52321 gcgattaata caattatta tgcataatag taagattgag attcttagaa atagcaata  
52381 taatgtagac ttattttat atcttttat ttcattattt tatactggta ttggtcctgt  
52441 tgttcaatta attattttta agaactaa aggttatcca ggatggaata tagagtcaat  
52501 aattttattt caggaatgg ttattttaat atttggtatc aataagttaa tattcatcg  
52561 tgtacgttct aatattaatt atattttta aacaggttca tttgatcaaa tttattaaa  
52621 accatatcca ccaatagctg ttatattatc aaatggttc tatttgaaa gtataacatc  
52681 aattatagcg ggattatta taattaatta tagtctagtt aagttaaata taaatttag  
52741 tatttatcat atttaatat ttttagttac aattgtatgt ggattattat taacagcatc  
52801 tattaatatt ttatagcaa ctttactct tcatttaatt aactactgaaa agtttagtga  
52861 gataatagat acattacttt ctttaaaaga atttctttg cagatattcc cttagagctat  
52921 acaattacta ttactacta tatttccaat tgcaatttt gcctatatac caactcaagt  
52981 tttattagat agaatggatt ttagtctatt attggctata ggatttagca taattgcttt  
53041 tattataagt ttgagaattt ggaataaata tatgtataaa tatgtaagtt taggaggata  
53101 actatgtagt aaaattatat tattaacta aataatgta aaaaagaata tagggttaag  
53161 gcatacaaac aaggaatatt aaataatata aaaactgt ttgaaaaaaa gtataaaaata  
53221 gtaagagcag tagatggaat tagtattaat ataaagtatg gagagataag aggattatta  
53281 ggaccaaag gagcgggaaa gtcaactaca ataaaattac taacaggaat ttacatccg  
53341 tcggatggtg aatagatgt aatgggtat aaaccgtgga ctgacagaat ggaatagta  
53401 aaaaatatag gagtaatatt aggtcaaaaa tcacaactta ttgggatat tgcaccgcta  
53461 gaaacatata aattgcataa atctatgtat aatatttcag aaagtaaatt caatcagaac  
53521 ttagaact tttgtaaat tctgatata gatgaagtga ttgaaaacc ttttaggttt  
53581 ttactactag gagaagaat gaaatgtgag ttgtttgt ctctattaca tgatctaaa  
53641 attgtatttt tggacgagcc tactatagga cttgacgtaa ttgcaaagga atccataaga  
53701 agattataa aagaaattaa caaagtaaa agaacaacat ttattctaac tacacatgat  
53761 ttactgatg tggaggaact atgtgataat attacagta ttagtaatgg gcatgttga

53821 gtagatgatt caatagataa tttaaaaaat ttattttctg agaaaaaggt tatagacttt  
53881 aaattttccg aggaagtaaa tatcaaaaaa ttagtgatt tagacgtagt ttgtattgat  
53941 ccatactctg tatctataag agtagataat aaagaagaat atcttaataa aataattagt  
54001 aaagtagtta atgagtttaa tgttatagat attaataat ctaaggtttc tatagatgat  
54061 attataaaaa gatgttatat ggagaagtaa agataatggt taagattaat gaatataaaa  
54121 catatgaagg tagtgactgt ttttaggtt gtatacaaaa ttattattg ttatatcaaa  
54181 attagttga tgagtgaac atttttttg aagggaatgg ctttgattta acatatatat  
54241 taaatgaaga tgataagat tctattaaat ttaaggcaca tatcaacgaa tccgtttaca  
54301 agtattgcca taaatatggt gtaaaattac aaaaaagaa atttaaagat ataaaagtag  
54361 ctgataaaga attattagag gatttaaaga aaaatcatat agtaataaaa ttaaatgcag  
54421 agaactgaa gtataatgat gtttcaaact actcttttc agttacacac tatataaatt  
54481 ttttatcata tgactttaat aagaatagag catatattag tgatggtttt atacctaat  
54541 atccaagaga aatttatcaa ggatggtata actataagga tcttagatat gcacgagaaa  
54601 aagtggaata tgaatatata gttgtgaaa aagattcttt acaggatatt tatgaaaaat  
54661 taaacaaatg tgaggtaaact aaaagattat ataattgcgt aattgataat atcagaagat  
54721 atataagagg tggaaaagat aaagatgcat atcatgggat tgatgctata gaacatttta  
54781 tagataaaat ttcaggctca gtagtagatg atgcagaaga gtttcaaag aatatctata  
54841 aaattcactt aaagcttggg gttaatggat ttattaatat aaaatcgctt ctgcaaaga  
54901 caattttaa attagggcaa gaattactg ataaaaat ttaaaaaatg tcagaagagt  
54961 tacaagagat atatgagaag tggatatata taaatcgctt atttattaag tgttctattt  
55021 ccaaaagaca gaaagatatt gatattatag ccgaacgaat gaacaagctt tttcaaactg  
55081 aatacaattt gtataaaaaa ctttactat atattgataa aatgaggtg aaattatgat  
55141 atataaccta tttaaaat cagttcataa gtatggaaat aatattgctg tgcaatgtga  
55201 tggaaagaag ttaacatata ctgaactaga tatttcaata aagcatatag caaatgaatt  
55261 aaagagaaaa ggaataaggc aaggagatca tattgctata tttatggaca attcagttga  
55321 atacattaag gcattttatt ctattaattt gtgtaatgca gttataattc caatttatac  
55381 acatatagga cgagaaaagt tttgaggct catagaattc ttagatgta agtatatcat  
55441 ttctactagt gattataagg aatttttaag caatgaaact atagttaaat gtcaaaaatt  
55501 atccaatata ttcttattat ataagatga tgtcaaagat ataggcggat tttataaagg  
55561 gagtattatt aataaatatt atgaagaaac cctgcagtt ataagctat catcaggcac  
55621 tactaatttg ccaaaaggga taatgctatc aaataagaat attaagagta atattaattc  
55681 tatatctagt tatctagaat taaataataa agataaagtt ttattgtaa aaaatctac  
55741 acattcatct agtattacag gagagatggt aacgtcttg agtaatgggt gtactttata  
55801 ttaacacaa aaaattataa caccatcaat gattattaag ttaatttcgg aattggatat  
55861 atcaatattt tttggtacac ctaatttatt aactttaata ttagaaaaata agaatatagc  
55921 taaatataat tcaaaaaat taaggaaaat taattttat gggcaaaaaa tggatgtaa  
55981 tattatacag agattatgag atacctttac tgattctgaa ataataatatt cttatgggtt  
56041 aactgaagca tctcaaggg ttagttatat caaaaagaat gatttataa ataaaaaggg  
56101 atcatctgga aaaccaatta aagatgtaag tatatttata gaaaataaaa ataaaaaaga  
56161 attaggccct ggtatggtg gagaaatagt agttactgga cctaatgtaa tgatgggtta  
56221 ttataagaat ttagatttaa ctgaaaggc acttaataaa tctaaactgt atactggaga  
56281 tataggtttt attgatcaag atggattttt attataaaa ggaagaaaag ataacatggt  
56341 aatgttgct gggaaaaatg tttatgcaga agagattgaa gagatattat gttctataga  
56401 aggcgtaaaa gaatcattag ttactggtta aaaagataaa tttatgggtg ataaactaat

56461 tgcctatata gtaaaaaatg aaaaaattga tactgaagag atattaagct atcttaaatt  
56521 atatttagat aattataaag ttccctcatga aattatatgt gttaaatcac ttgaaaaaac  
56581 agtttagtggg aaaattgtaa gaaaggaggt gaagaactat gaatagcgat ataatgaaaa  
56641 gagtaataaa cattttatca aataatgaaa ggtttaaaag tagtgaagtt aactatgact  
56701 taaatttaat taaagattta gggtttgact cacttgatat tatgaaattc atagtagaat  
56761 tagaagatga atttaatat atgtttgaac cagaagagtt agagtatgag aatataataa  
56821 atattaagaa tttatgtgat ttaataaata gtaagattat ttaaattgat tagggagaag  
56881 aatgagaca tataaatgaa gagttattta atgaatgcta tggaaaaatc aaaaaaatt  
56941 ttatggaaat aagtaagaat aatttatatt acagaaattt atttaataaa tataaattta  
57001 atattgagga tttgttaaat tataatgatt tctgtaaaat acctattatg actaaacaag  
57061 attatttaga taatatagat tttttgaaa aagttattag taatgaaata tataatgttt  
57121 tatatacaag tggatcaaca ggaaaaccag taaaaatatt tattactaaa aaagatgata  
57181 ctagtctgaa tatgattttg tgtatgtacc gtaatcgtat ttctaaaaat ataatttgtg  
57241 agaaaatgct ttaatacat tttttgaaata ttaaaggtaa tgaggagtat ttaattgagg  
57301 ataaaggaaa acagtgtcaa catttttgtt atggatgcat aatgatgggt gtattagaag  
57361 aatatataa attttataaa caatttcaac ctaaatggat agttggaaat acatcaatta  
57421 tttatgcttt ctcagaatat ataaagaaat caggaaaaag tttatcaggt atggatataa  
57481 gatatataga gtgcatttca gaatatataa caacagagca aagaaatagt ataaaagaag  
57541 ttttaattt aaatctaaa agtgcttacg gttctaatga agtaaataca attgctatag  
57601 aatgtgtcaa tggaaatatg catgtaataa aggaaagtgt gtttgtgaa atagtaaact  
57661 aaaatgaaca gggaattggg gatatatag ttacttcatt agataataga ttaactccat  
57721 ttcttagata tagcttagga gataaggaa gatgggttaa tgcagaatgt aattgtaact  
57781 tcaaatctcc tatattggag ataactagat atagaagcaa tgattttcta ttaaaaaaag  
57841 atggaactag aatggaagta tggaaactaa atagtgtctt aagagaatca actaataaaa  
57901 ctaattttca aataaagcaa tatcagttta ttcaaattga ttataactta tttaaattaa  
57961 agattttaga aaaagaagat ggaaataata tgaataaagc gatgtttgaa agttatttta  
58021 tagaagagtt cagtagtatt ttcaagaaa aagtaatagt tgaatttgag tatgttaaag  
58081 aaacaattcc agttgagagt aaaaacggaa aatttaataa ttttaaatca atgcttacct  
58141 agagagtaag ctaagatgta aaataaagtt taaatgtata gaatataaaa ataagtaata  
58201 tatgattgtt gagggaaaag atgattaaag gaatttgttt cgacatgggg ggaacacttg  
58261 taaatttag ttcgccat agtctagtgt atattataat ggaacattca gagttatcta  
58321 aatctgaaat taaagatctg gttcgaaaac attttatgtt gaagattgt aactctgatt  
58381 ctgatattag tgagtttta aagaaatgca gatgtaataa tagagataag attgtagaaa  
58441 tcattagaaa tcgtaaggta acatatgaag ttattgataa agcaatagat aactggata  
58501 ttttaaaaag caaaggttat aaaattggaa taattcaaa tacttctcc tataatcaca  
58561 tatctacaga aattattggt ataagaaagt atattgatta tgaatatat tcgtttgaag  
58621 taggatttgt taaaccagat ataagaatat ttaaaataat gcagaagaaa atgggatttg  
58681 ataaccatga gttattcat ataggagata gtattacatc ggatgtaatt ggggctaata  
58741 gagcaggctg gaaaagtctt tggttaatg aggctaataa aaattcgggt gatagtatgg  
58801 aaattaattg tttatctaag atagtaaatt tattaataa gtaaataat tcagacaggg  
58861 gaagagtata gtgatagata ttaataataa atttttat cttttatcaa aagatcaaaa  
58921 aattaagtta gagttttata ataatacaaa aaagttaatt aatgataatg caacaattat  
58981 aaaattattt gatgagcaag tattaagaac acctaatgaa atagcactta tatttaatga  
59041 tgaacagata tcatacaaaa cttaagcaa gaaagtagat ttattagcaa atagattagt

59101 caatatgagt atacctata ctcaacctat aggaatattc ataaatagag gtttaatat  
59161 gattatttca atattagga tattaaaagc cggttttcc tacttgccta ttgatatta  
59221 cttaccgggt gataggatta aatatatgat aatgatgca aaggtaaact atattattac  
59281 tgagcacttt ctgttaata aattttaga aatgagtcc ataaaactta ttttattga  
59341 agacgaaaat ttaaacagta ctggaagtgg agcatatagt aatgataata aatggccta  
59401 tataatata acatcaggat ctcaggtaa acctaaaggg attatgatag ggcaaagatc  
59461 agtatgtaat tttatagaag gagttacaga aaaaattaac tttaaagcag ggagtgcaat  
59521 tttaaatatt gcaaccattt cgtttgatat tttcttcta gaaacgatag ttgcacttac  
59581 taaaggttta cgagtataa ttgcagatga aataactcaa aaaaatttta aactataaa  
59641 tagattaatt aataagttta atattaaat gatacagtgt acgccttcac aatgaaaat  
59701 attggtagaa tgtaacaata ctggaacac tttgaaaaat ctgaaacta taatgatagg  
59761 gggatgact tttgatag agcttctaac ctcaataaaa aagttacta aggcaaaagt  
59821 atacaatag tatggacctt ctgaaacaac aatttggctt agtattaaag aagtactca  
59881 tagcgagaaa attacgattg gaagaccgat acaaaact gaattttt ttgttaatga  
59941 atgtaaccag tgtgttccat taggtgaaga aggtgaactt ataattcag ggttaggatt  
60001 agcacatgg tacgtaaaaa aaagcataa taaaagttt atagatttg attgtgtaac  
60061 aggaaataga tttataaga ctggagattt ggtaaaatt gatgaatcag gagagataat  
60121 tttattgat agaactgata atcaagttta aattagagga catcgagtgg aattaaagga  
60181 agtagagctt agtataagaa aaaacttttc agtaaaagat gtttcagtag ttcctttaa  
60241 aaataaattg gatataaata tttatgtgc ttatatagta tttgattatg atattaat  
60301 tagtaattt aaagctgac taagtaaga actaccatca tacatgattc caagttggtt  
60361 tgcagtactt gagagacttc catatactca taatggaaag ttagattata tatcttaac  
60421 tgattactt tttatagta aatgtcatt agtaactaaa aataatttca ttgaattgga  
60481 agatgaaata cagatgaaca actctattaa tgaaaaatta aaaagtttag taaaaaagc  
60541 agctaataa gatagttcta taaatataag cataaatgag aatttaaca atttaggaat  
60601 tgattcatta tctttatat cactaatagt cgatattgaa tacgaattca atatagttt  
60661 tgatgatgat atgctgtgt tagaaaagtt taggagtatt aatgatttag ctaactat  
60721 aaaaacta ataaaataa ttgactata tagttattat gtttaagaaa gtttaaggat  
60781 atattaata gttgaattt gtaattttat ttaaaaaag taagtattt atggatggtt  
60841 gaaaattatt tataaaattt aattttagtt ttatatgga tttaaaata tatttaatt  
60901 aaggagtaa gatgaaaag atagaggaat taaaagatt atcaaaaaa tataatattg  
60961 gagttgaaga tatagtata atagcattaa atgtttatgg tttaattt gaagattcat  
61021 cccaagaat aaggttaaag ttagtcttag atactaaaa aggagaggaa tttattttg  
61081 gattaccta cagagttgaa tctgtttt aaataaaaa taatattta tattagaag  
61141 gaaatagat gccataatc actaatattg aaaatgatga ttgtgcatca agctattata  
61201 gaaaaataa aactgtaata acgttgaact ctaattcaag aagtaaatgt aatggatgca  
61261 agttttgtcc aaataattt gaattaaata gtgaagatga tttttggtt tcaaatatta  
61321 agttgaggaa acattttatt aatatgtta ataaagcagg tcataaggat atgagtaata  
61381 tcgaaagat tacaattgt acaggatgct ttggagatga aaaaagatta gtaaatcata  
61441 ttcaaatagt aatgatggt ttagtgtgaa tgaattttaa aggttatctt cattacatag  
61501 gttcagaaat tacatctaaa gagtctttgg atgtaattc tagaaatatt aataagttta  
61561 tgattacatt aacagtagaa tgttttacac gaagagattt aatattaaag tcgaataaag  
61621 caaaaataac tatagaaaaa tatattgaat taataaaaca atgtacaagt ttaggattta  
61681 ttactaatat aatatatata ttggggctag atccattaga cgatgttata aaaaatgct



61741 aattgttttc aaagtatact aactactttc catcaattaa tatatttcaa gttcacaatg  
61801 gacaagataa aagtttatgt tgtgatgagt atgataaatt agaatatata ttaaaagcaa  
61861 gaaagaaaat tgaagaaata tatataaata caaatttacg tccaagctct tgggagtggt  
61921 atagaccttt atggacttt gagtttgctg atgaaaaatt atgcggtata agaatatagt  
61981 taaaaagggt attagactat gaataatgat gaaacttgg ttaatataga taaatactgg  
62041 agagcttcta actatttaac attattatgt atgtatataa ataaaaattg tatgttaaaa  
62101 aaaaatttga ggctgatga tttaaaaaag atgtcaacag gacattgggg agcaagcaca  
62161 ggaataaatt ttatatatgc taatttaaat gcttttatat cgaatatataa ggtagattct  
62221 attttagttg taggaagtgg acatagtgca gcttctatat tagcaaattt atatttgga  
62281 ggtactttac aacattattt tgaggatatt actttagatg agaaaggaat tgaaaattta  
62341 atagccaaat ttgaaaata taatggattt agaactgaaa attatcctgg tatacctggt  
62401 aatataatg atggaggaga acttggtac tctttatctg ttgcttttgg agcagctttt  
62461 aanttgaag agaaaatagt gttttgtata ttaggatggt gtgaatgcca aacaggatca  
62521 atagctactg gatggaatgg aataaaattc ataaatccta cagagtctgg tgtggtatta  
62581 ccaattataa atttgaatgg gtttaaatg ggatcaaaga gtattctttc tttaaagtct  
62641 aataaagagc ttagagatta ttttagtggg ttaggctata atgcttttat tatcaatagt  
62701 tcacataaag aattattta tgcattagaa gaatcttacc gtataattaa atataatatt  
62761 aaaatgttta aagagaataa aaagaataat ttgaaatggc cagttattat atttaagct  
62821 ttaaaggggt taacgggtg ctatgatgat actaagcaat taatagaagg tagattaatt  
62881 tcccacaaaa caccaataat atcaaaggat atagataaaa aaactatatt attagaagaa  
62941 tggctattat ctataaacc agatgaacta ttagtgaag atggaaaatt agttccatct  
63001 atatctagta ttattcctaa taaagatttg cgcttaggta tgttaaatag taaaattaat  
63061 aaaataaaaa ataaattaat attacctgac ttaactaagt tctgggtaga tgaaccttat  
63121 tatagtaata taaaagtatt agataaatat ttaatgatt taataatatt aaatccaaat  
63181 attttataaa tattttctcc tgatgagtta gagtcaaatg gacttaatat tttggcatct  
63241 aatcattctt atgatataag caataaatat ggtaataaat gtgtactaga aatattgagt  
63301 gaaaatactt gtcaaggtg gatgcaaggt tatcttatga tgggaaacca tggtttttt  
63361 atatcatatg aagcatttgc tccaatagta tcaagtatga tgagtcaata ttttaaatat  
63421 ttaaagcaag ctagcaaat aaagtggaga aacgaaatta attcattta ctatatatta  
63481 acaagtgtat gctggctaa tacttattca catcaaatc cagactttgt taataatgcg  
63541 attttagag atctatctta tataaatgct tattatccta gtgatgctaa tgttctcct  
63601 gcttgcgtaa atgaatgcaa tcaaattaaa aataagatta atattattat tgtatcaaaa  
63661 cgaaaattac cacaatata tgatagtctt tatgcttga aagctgttga agatggatat  
63721 tatgaaatta atttacaag taacaataaa gtaaagttag atataatact agcatgttca  
63781 ggtgatcata tggtaaagga gtctattgaa tgtgcaaatt tattaataatc ttatattaag  
63841 aatataaata ttaaattgt tgtaattata gaaattacac gtttatgtga aaaaagagga  
63901 aattatagag gaattaatga aagtattttc aagaagatat ttcttatga tacaatgtt  
63961 ttatacaatt atcatggata tccatcggtata atacaacac ttctatttga tagaaagcat  
64021 agtaatcgtat ttaaagtatt aggatattct gatgaaggtg atacttcagc tccagaatta  
64081 ataaaaatga ttttgaatgg agtaagtaga tataacctat gtcttgaggc aatagatgtt  
64141 ttaataaaaa ataaaaaat agattttgat tattacaatt atataaaga tgatttaaat  
64201 ttaaaaataa ataagacttt tgaagagtta gagaggtgat ttacattagt tcatatgaat  
64261 tttgaaaca gtatataaaa gatatacaa acaattaga aaagttattg aaatctaaaa  
64321 aagaatata tttagcagc ttacatatac attcaatta ctcatgtgat ggaatgcaa

64381 cattaaaaca aattttaatg tttgcatcag aaaaaaatt agatgttata tcaattacag  
64441 atcatgatag tatttcagtt tataatgagt tacctaaaga aatagagatt tgaaaaaaa  
64501 aaggatataa gctaccaatt ataataccag gagtgaatt ttcagtaagg tttgacgaat  
64561 atgggagcat gtgtcatata ttaaagtatt ttattaatcc tttgatcct ataattatag  
64621 aagagattaa cagaaattat aaagcttact ggaatagagc tgaattcag attgataggc  
64681 ttaagtataa taaagcagta atgagctatt tcagacctaa tagtataaaa gtctctataa  
64741 atgattttta agagttttta tataataatt acaaaatacc aattccagaa tataatagca  
64801 ttgcagaata tatattttca aaattaaatt cagtaggtgt aaatgtttct gatgttcttg  
64861 aaaaatcgat attaataaac aatgaagaca aatgcatagt gagaagagac tgaaaaaat  
64921 tagcatttaa tagatttata aataagtata aaggatgtaa cataaataat tcaaagtact  
64981 tattacccat attatctgtt cctaataatag atgatgagga atttattaat tttgatagta  
65041 gcggttaatt atcagtaaat aactatggac aaattcgctt tgaagattta aatagaaat  
65101 atattactgt atttgctcat ccaatgaaa ataaattaga aattttatca aagtatttt  
65161 atcagaatca aattgttgat ggaatagaaa ttaataagag aaataggcat tgtgaaaaag  
65221 ataaaact aaaattgtt agatcgcata atattgttta tacaataggc tcagacgatc  
65281 atggtgatca tttatatact tatgaggata ttaattatta taaattaaat tcaatagaat  
65341 ttaaaaaat ttaaaaaata gttatgagga gagaggaact atgaccaata ttaataaagg  
65401 tagtcagtac attgactcaa gaaatctaaa tgtaagaatt aaattacatg aaatgttag  
65461 tactaataag caaggtttc acgaatggat atttagccaa ttgaatctca aagaaaat  
65521 aaaagttta gaaattggat gcggtcctgg agcattatgg tataaaaatt tcaatgaat  
65581 tcctaaattt attgatatta ctttagttga tttatcagca ggtatgttag aagatgctaa  
65641 aaaaaatatt gaagaggta caagtagtaa aaactttaa tttgtaaag ctaatataga  
65701 gaaacttct ttaaaaaata aagaattga tatagtaata gcaaatcata tgctatatca  
65761 tgttccagat atctcggcag gtttagctga agttaaaga gtattaaaag ataatggtgt  
65821 gttctattca tcaacttta gtaaagatca ttacatgaa ataaattgca ttacaagaaa  
65881 atttgttgat ataaagaaaa atagaacatc agatcgtttt tgcatagaaa atgctgaaga  
65941 acagcttaat aacatttta gtagtattaa attattatg catcaagata gtcttattat  
66001 cacagagtct caaccgttaa ttgattatat aatgtcaggt agcaaagcta aggaaactt  
66061 agttggtgat aaatataaag aattttcaa gtatattaat gagtgtgtat ttgaaacagg  
66121 tgttttaat gtacaaaaa aagcaggtgt atttatatca aaaaaataa aaaattaaat  
66181 tatatgtata aaaagttat agaaaattaa agggagcaat aatagagaat gtagaataat  
66241 ttgtgaatt taatattcta tatcggttat ataactggaa atttatttc cagttatatt  
66301 tttatattt tcttcaata ctaataatga gttagtatgt taatttagt atgtgcaat  
66361 tttgaaata tatacttta atccaaatat gtacaagcta aattgctagt gcagtttca  
66421 ttctctcac aaaaattatt tcaaattgta gtagaatagg accccaattt gctattggtg  
66481 aagtccattt tttcatcact tgatctgtag ctaaataaa agacttcctt agtgattcat  
66541 ctgttgaaa tactgttctt atcttagtaa attttctaa ctgtctattg aatccttcaa  
66601 acaaattgt agtataaatc attttctta taccattga aaaatcaaag aatgtactta  
66661 aattattcca attagagtac catgaatcta tgacattagc atatttataa tcccatttt  
66721 ctttaacta atccattctt accaactaaa tcttcaactg atttacaatt ttaattttt  
66781 tcttgataat tgatttctt actcatttga aatcctcctt aaaatattaa gaatattat  
66841 ccaaattttc cagctaagta ttcaaaaaa ctgtagggaa atttgtttt acacaaatt  
66901 ccctacattc tctaacctt tttttaacc aaactcattg ttaatatcat catcaaattc  
66961 atcttctgaa atactattt taccattatc agaattagca aaattttat cagaattctt

67021 agtaatactt atttcgttac caacaatcaa attataaatt aaaaacttta tataggttcc  
67081 tttttattc ttcttatctt ttactaaatc ccatatggct gcatctctag gatcatctaa  
67141 atttaacttt aagttaacac gctctatatt tgccatgact atttacccca tttagcttca  
67201 gctatcaatt tattaccttt cacattacta aataaaggat ctggaacaaa atttatatt  
67261 cctaagtttt ctctaatgc atcttgtaa tctaagctgc caccgccagc tcccaaatt  
67321 ttataagtag aaaaattagg aactttaagt ctaaccttat ttaattatc ttaacaaat  
67381 ctctctttg ctttacttg atcaatagta tcattcttaa ttagtcttat ttttcttca  
67441 acatcagcat tattacctag tttattatag tcttcttgta ttcagaata taaatctatc  
67501 ataccaccag gaacagtaaa tttcataata catttaccac cagaagatac acatatattc  
67561 catgtcctac cacctatc caatatcact aaatcttta cccttcttc ttaggtaaa  
67621 gtataaaatg agcttagtcc ttctgcaact gtagcaact ttttatttt tatatttta  
67681 gtaactcaa ataaattaa attaaaggac ttattaagaa gcttttctt taattctca  
67741 cttattccta aattagaagc tggactcct aatacctaat cagtctctat attatctaca  
67801 tcacatgatt ttgaaattgc ataaagtaag ttaggtataa agttttctt agctttatta  
67861 aactcattct caaaatctcc agattccatt ctataaaatt tttttctaa ttctaaaaga  
67921 tctgtatcaa aatcttcttt ttctacttct tgatatctac tttcaaatat aatccttca  
67981 catgttttga tattataatt tctaaatca actgctatta tcaatttaa aacctcatt  
68041 ttttaaaaca aatcataagt cactaaaag taatttttaa gtgtttaaa agttactttt  
68101 aagtactta tattattata atatcaaaaa gttacctaaa agtcaacttt taatcaccaa  
68161 aaagttactt ttaagtact ttagaaaaa tataataaaa aagagagtaa aattttctat  
68221 aattttactc tcttgaaaaa ttatttttaa catggtatta ttaactcaat taaattaaat  
68281 agtacggaaa aggaaaaatc cactaagttt cctcgactcg ccaaagtaag taaacttaat  
68341 ggatgaacct aaatccgaaa tagaacaag ttctatttga aatattcact tttcatagct  
68401 ttactatc aaagctattg aaaaaagtca atgatatcta ttgactttt aatagaatg  
68461 taatattagc aaatttttac ttcttctat ttaggattta gtgtacttc ctatgaaa  
68521 ggagttattt ttatggcata cacacactta ttaactaaag aacagttaga acaagagaaa  
68581 aggtttaatc tcgaagaaag agattttcat gtcttaaatc aaatcgaata taaagagtct  
68641 agaagaaaag ctcaaagat cttaagatt attagaaaag gtattttatt aaataatgga  
68701 tctggagca tctcatttc taaaattcat aaagattata atgattgggt aaataaaaac  
68761 aaaaagaaaa gaccagaatt aagaaatata agcttaaac aaataaaaa tatagtaaat  
68821 aaattaaag atttaggttt acttattatt gaaaatgta aaaaagaaa ctgtatttt  
68881 ctaccattac ccaataaatt accaataat gaaaacatta caatccctga tacaacaagc  
68941 atagatgcta atcaagctac tcttaggtat attaggaata ataatataga tatagattct  
69001 aatagtaact caaagaatt taatgcagat atgtatgaaa aatgtacaag tctgttgat  
69061 gttagaata aagttaaaga gttacttaa gctgcaagag ttaagagctc ttggattaag  
69121 aataaggttt taacaaaatt aagtgaaac tatagaaata taactgtaa attttagag  
69181 agttatatta atacagctat tgagaacact agaaatacat attattcaaa ttatagaaaa  
69241 tatatcaaga acaatgcaaa caacagagct ctaccaaact ttacagaaag aaattattca  
69301 aaagattact ggaaatcct agaagaaaat ctatgtttta attaataatt taacaattaa  
69361 tagaatttat tgttaaaaa tagattataa ataaactgaa aaatttcag ttattaaaa  
69421 attgggaatt accatatttt tttatagata attgatata atgagaacag aagttcgtat  
69481 gtatatgaga acaatcgttt gttttggtta ttgtcaataa aataaaatgt ttttatag  
69541 agcaatgata tttattgctc tatataaaat ataaatcctt gagtatataa cttaatatta  
69601 aattttatga tttaaatag atttaatttt tcttcagat attcaatc gatattttt

69661 aagtcaagaa tatcagttaa agatcctaaa actactccga ttatattaat atcactatt  
69721 ttatcataat attgtatttc atatggaagt gtactacatg ggtgtagttc taatttatct  
69781 tttttcttat gtattttttt acaagtagct tcattgtttt cacttaaata agctattact  
69841 atacgccat caataggagt tttatttcta cagcaaataa ttaattcatt gtccttgaat  
69901 aatttattca tactgttccc ttttactctt aaggcgaaac aatccttgta attgctaggt  
69961 aaagcaattg atttactaat tcattaaat gcatatgatg gggttccgca a

//

DEFINITION Plasmid PLASMID\_3

CDS 1..897  
/color=7  
/locus\_tag="D90\_04613"  
/eC\_number=3.4.21.88  
/note="LexA repressor Helix-turn-helix domai, similar to  
AA sequence:UniProtKB:P31080 protein  
motif:CLUSTERS:PRK00215 protein motif:TIGRFAMs:TIGR00498  
protein motif:Pfam:PF12844.1"  
/product="LexA repressor Helix-turn-helix domain  
[transcriptional regulator]"  
/"ID=D90\_04613  
/protein\_id="gnl|SC|D90\_04613""  
/gene="lexA"  
/codon\_start=1

fasta\_record 1..11010  
/ID=D90|SC|contig000004  
/label=D90|SC|contig000004  
/note="D90|SC|contig000004"  
/colour=5

CDS complement(930..1244)  
/color=1  
/locus\_tag="D90\_04614"  
/note="hypothetical protein, ab initio  
prediction:Prodigal:2.60"  
/product="hypothetical protein"  
/"ID=D90\_04614  
/protein\_id="gnl|SC|D90\_04614""  
/codon\_start=1

CDS complement(1257..2192)  
/color=10  
/locus\_tag="D90\_04615"  
/note="ParM/StbA family protein, Plasmid segredation  
protein ParM , ab initio prediction:Prodigal:2.60"  
/product="ParM/StbA family protein Plasmid segredation  
protein ParM [partitioning system]"  
/"ID=D90\_04615

/gene="parM""  
 /protein\_id="gnl|SC|D90\_04615"  
 /codon\_start=1  
 CDS complement(2389..2886)  
 /ID=D90\_04616  
 /color=1  
 /locus\_tag="D90\_04616"  
 /note="Ribbon-helix-helix domain-containing protein"  
 /product="Ribbon-helix-helix domain-containing protein"  
 /protein\_id="gnl|SC|D90\_04616"  
 /codon\_start=1  
 CDS complement(3019..3588)  
 /ID=D90\_04617  
 /color=8  
 /locus\_tag="D90\_04617"  
 /note="Type III toxin-antitoxin system ToxN/AbiQ family toxin ToxN"  
 /product="Type III toxin-antitoxin system ToxN/AbiQ family toxin ToxN [toxin-antitoxin]"  
 /gene="toxN"  
 /protein\_id="gnl|SC|D90\_04617"  
 /codon\_start=1  
 CDS complement(3902..5473)  
 /color=4  
 /locus\_tag="D90\_04618"  
 /note="Relaxase/Mobilisation nuclease domain, protein motif: Pfam:PF03432.8"  
 /product="Relaxase/Mobilisation nuclease domain [relaxase]"  
 /ID=D90\_04618  
 /protein\_id="gnl|SC|D90\_04618""  
 /codon\_start=1  
 CDS complement(5434..5763)  
 /color=4  
 /locus\_tag="D90\_04619"  
 /note="Bacterial mobilisation relaxosome protein MobC, protein motif: Pfam:PF05713.5"  
 /product="Bacterial mobilisation relaxosome protein MobC [relaxosome]"  
 /ID=D90\_04619  
 /gene="mobC""  
 /protein\_id="gnl|SC|D90\_04619"  
 /codon\_start=1  
 CDS complement(6001..6888)

/color=8  
 /locus\_tag="D90\_04620"  
 /note="Site-specific DNA methyltransferase, protein motif: Pfam:PF01555.12"  
 /product="Site-specific DNA methyltransferase [methyltransferase]"  
 /"ID=D90\_04620  
 /protein\_id="gnl|SC|D90\_04620""  
 /codon\_start=1  
 CDS complement(6956..7249)  
 /ID=D90\_04621  
 /color=8  
 /locus\_tag="D90\_04621"  
 /note="type I restriction endonuclease subunit M"  
 /product="type I restriction endonuclease subunit M [methyltransferase]"  
 /protein\_id="gnl|SC|D90\_04621"  
 /codon\_start=1  
 CDS complement(7493..7696)  
 /ID=D90\_04622  
 /color=1  
 /locus\_tag="D90\_04622"  
 /note="hypothetical protein"  
 /product="hypothetical protein"  
 /protein\_id="gnl|SC|D90\_04622"  
 /codon\_start=1  
 CDS complement(7720..7827)  
 /ID=D90\_04623  
 /color=1  
 /locus\_tag="D90\_04623"  
 /note="hypothetical protein"  
 /product="hypothetical protein"  
 /protein\_id="gnl|SC|D90\_04623"  
 /codon\_start=1  
 CDS complement(7914..8348)  
 /color=9  
 /locus\_tag="D90\_04624"  
 /note="DNA repair protein RadC RadC-like JAB domain , similar to AA sequence: UniProtKB:Q8KES1 protein motif: CLUSTERS:PRK00024 protein motif: TIGRFAMs:TIGR00608 protein motif: Pfam:PF04002.9"  
 /product="DNA repair protein RadC RadC-like JAB domain [repair and recombination]"  
 /"ID=D90\_04624

```

/protein_id="gnl|SC|D90_04624""
/gene="radC"
/codon_start=1
CDS    complement(9489..10034)
/color=8
/locus_tag="D90_04625"
/note="Plasmid epsilon-zeta postsegregational killing
system Zeta toxin AAA family ATPase, protein
motif:Pfam:PF06414.6"
/product="Plasmid epsilon-zeta postsegregational killing
system Zeta toxin AAA family ATPase [toxin-antitoxin]"
/"ID=D90_04625
/protein_id="gnl|SC|D90_04625""
/codon_start=1
CDS    complement(10234..11010)
/color=2
/locus_tag="D90_04626"
/eC_number=2.7.7.47
/note="Streptomycin 3"-adenylyltransferas, similar to AA
sequence:UniProtKB:POA0D1 protein motif:CLUSTERS:PRK13746
protein motif:Cdd:COG1708 protein motif:Pfam:PF01909.17"
/product="Streptomycin 3"-adenylyltransferase [antibiotic
resistance]"
/"ID=D90_04626
/protein_id="gnl|SC|D90_04626""
/gene="ant%289%29"
/codon_start=1

```

BASE COUNT 3303 a 1965 c 1264 g 4478 t

ORIGIN

```

1 ttgaaaaata attacttttg tgaaaatcta aaatatataa ggagttcttt aaatcagc
61 caaaaagaaa tagcaaatca ctaaaaatta aatcctagct catattctaa ctatgaaaat
121 ggtcgccgag agcctggtat agatgtttta ataaaaattt ccgatttcct taacgttgaa
181 atagataaac tcttgactga aaaccttagc aacaatgata aatttttgaa ggatattcaa
241 aacaaaattt caaatgatat taattatgat gaaaaaatta aggatattaa ttagatatg
301 cgtaaaaaata tcttatttga atggagaat aaaaaaagaa aatgtttatc cctaattaat
361 tatgaaattc caaaaaaat taaagaaatt gataatctaa ttaagtatat aaatctttat
421 actgatcaag atgtagagat tagtgatgaa atctcaccta atactagtga atttaaaact
481 aatgaaaaaa gtattgacta tagatctata aacctaattg gaaaagtatc tgctgggaat
541 ccttgttatg cttacgaaga ataataaac acttataaaa tccttccaa tatcctatgt
601 ccttctaaaa attattttat tcttgaagtt aaaggagata gtatgaataa aatctatccc
661 cctggtgatt taatattaat tgaaagtaca aatttagtta ataatgatga tattgttatt
721 gctataattg atgatgaagc tacttgcaaa aaaatcaatt ttctcctaa tgaattatt
781 ttaaccctc aaagcactaa ccaatacac caagttcaaa tatataaaga tattaatgtt
841 catatattag gtaaagttct tgtaaactt tctgattata taagaaaaga tgagtaatag

```

901 tatatattac tcatcttttt atattttaac taatcagga tatcatttaa taactcatta  
961 atagagtctt cataatcagt attttcctta tctacagata tttcttcaca tttttttta  
1021 ttatcttctt gtaacctatc tagtactttt tctactattt tattaatatac tatattggaa  
1081 tgtacgttac ttgttcattt attattccct tttagaactg cccattctaa tactattctt  
1141 tctaaactag ctgaatcact tgaaggtttt ctatctctt tttttccct aacaatgttt  
1201 aaagtttctt ctctattgt ataggtctta ctatcttcg ccattttagt atctcctat  
1261 ttaaagactt ttgtaccac aatgtaaaga ctttagcag ttgccatttg tgggtctct  
1321 actaaagtac cattatata tttcattctt tgagtagtcc cccaccaa ataaatatcc  
1381 atttctcag tattaacca ataactatca acttcttgag ctacttttc tgaagatt  
1441 ctgtatcctt tttccttaa tttatcataa tcaccagtat tactatctat ttcaataac  
1501 tcttagata aattatatt atcgtttaat tctcttgca catattcaag agctgtctta  
1561 tttcctaatt caagcattt agattttta tcattaaact tcattccctt atcaaagat  
1621 gtaaattctg tagttctaaa acctacagtt accattcca taggtttatt agtagttgt  
1681 ctatctctta attcccaaaa taatgctgca tctgactctc taaatattga tatatctct  
1741 atgaaaactt tcttataaca tttagttata ttattcatta tctttactgt tttaccctta  
1801 taagcttcta tcaacttctg taaagttctt ttattatag atttattgg aactccta  
1861 acaagtttaa cactattagc tactgctaac ttatctaata atgcatataa taattttca  
1921 gcagttaacg taatcttaga ttccatata ttagaagttg gagaataacc ttacttca  
1981 gtaataatc cagcaaaaata ttcttctct tcaacttcta aatataatcg atctttatag  
2041 tcatcaaaa atatttctt tcttagacta actattgatt taaagcaaca ttactagct  
2101 tctcattgt aaactgtata accttttgta tatccagcc caatatctgc tctattatt  
2161 tgagattctt gattaataat attttctcc atttttacac ctctttttt atttccta  
2221 tactatatt atatagtaac acataaaaat tgttatgca atgctatata aattttcaa  
2281 ctaaaaataa ttgatatagc attggtatat aaattcaaat ttaaataa attggtatg  
2341 caatggata tcaattaac atgttttgaa aattgatata ccattgttt ataaatttt  
2401 taaatattgt tctaaagcaa tattattat tttccaata gtttcattgc tttataaga  
2461 taatttttt atctctcat aaattccagt atctatccta aatgatctta catcattat  
2521 attacttctc aatcctgtaa tattactgt aatattgttt gaattcttt tattaattaa  
2581 tgataaaatt tcatctaat tatctaata taataatagt ctttcattat ttactcatc  
2641 tttaaaattc ttactatctt ctctttgggt atttgcttct ttttagtaa tattactgt  
2701 aatatcattt tgtaatacat actgattatc tatctttta tatcctaata taataagtct  
2761 tttatgaatt actgttcat ttttccaaa tgattcttt tggattttca ccattggtt  
2821 tccattatc aactctttt ttataaattc aactatttt attaaattat tttgttcca  
2881 ttccattttt acacctaca ctacttgta atattacact aatattgtac cattattta  
2941 catataattg taaaaataag cgatttat attaaattaa tatacaaatc gcttacctat  
3001 atatatctt atgaactttt aaatctttc tttttttta ttatgttcat cagcttttt  
3061 tgaagcatct ttaacaatat cttttattcc tacagtttt gttactgctg ctctccta  
3121 atctgaatta tattctaaag ctttttttc tataagttca aaattaacac atcttttagc  
3181 tataaagctt ctccactta taacctatt atataattta ttactttat ttttaattac  
3241 atcttcattt ttattataa atcttattg ctttgtaat aatattgaat atttagatt  
3301 atgtcttct tcaaaattat actctactat atttcttta tgaactgga tcatattat  
3361 taaattata acacctaat ctccatttc caatttaaaa aaatctatat tattctcat  
3421 agatttatgt tttcttttag gtgatgcaa cggagctata taattcatcc cattaactc  
3481 taataatata cctatatatg gacgtgattc attttatta tcttaatat tatcatcaa



3541 tttctttaga taatttatat aatcctcttt aactatatat attctcattc ccattctccc  
3601 cttataaaaa aaaagtaatc aattttgatt actttttca ctcttttagt ttctcgctta  
3661 ctggaggaga ttcaccgctc ttttagtttc tcgcttactg gtggagattc accgctcttt  
3721 tagtttctca ctactggtg gagattcacc gctctttata ctgatttata atcattatat  
3781 tctatataat atattatacc attctgcata taaatattca actacattgt acttttattt  
3841 atgcctttat ataaagataa ccaatgatcc taataactaa tgatctttgt ataagattaa  
3901 tttatctctc ttttctttc tcttagtta agtcgatttt ttcttgattt atattttcta  
3961 ttttactatt agcctttctt atactttcta atctttttc tatattttta aattcattac  
4021 ctaataatga aatttcttct tttgttcaa ttattttttc ttttaactta tctatactaa  
4081 cgtttgtatt tatacctaag ttttctagtt tttcttttagc atgaaggaac attaatatct  
4141 cattttcatg ttttttatat ccccaaata tagttttctt atttccatgt ttctcgtaa  
4201 tttctttata attattgtat gttatcaaat attagatac ttgattaaat ttagcgttct  
4261 tattttctaa ttctttaata gtattaatta atcatcttt cttatttaat acttcttgta  
4321 ctttaccatc aaattcattt ctatttgata tttttcttt tctcaataga actattgcat  
4381 tggcaagctc ttaacatct cttatcctat ttcttctgat agtaaataca ttttcatcaa  
4441 ttttaacatc tcaacttta atatcattag attttcatc ttgactagta aagtaattat  
4501 ttatttgttt accagttaat atttcttctt ttctcctga agaattctata aatttatatt  
4561 catttttga taatgttact ttacattcaa atcattaat ccaattacat tctgatttat  
4621 ttataaatat atagttttca ctctctggca cttaacaaa ataattttt tcattttgat  
4681 taataatcat atctttatta attattatct ctttagcctt gttattttca ttaattctat  
4741 tttctatagc ttcttttagta tattcttcac ctatagtttt tctctgcaa aatctttgct  
4801 gattaggtgc tttaaatgct atatattttc ctctctttat ttcaaacct ctattaatca  
4861 tttcagtttt taattcatca aatgacttaa ctttatctat taattcatca agagtatctt  
4921 taatgtaagc tttccaactt gtaccctttt tattctcaa ccaactctta taatgcttac  
4981 cttttctttt aggattttct acaactta atccattttc ttgcatagt tcatcactta  
5041 ttgctctaag ttctttaaaa gtatctttat tacaattaa ctttctatag gtcgcataac  
5101 tataagcatt aaaaataata tgattatgaa tatgacctt atctatatgc gttgcaacta  
5161 catactcata tttttcatct gttattttct ttgctaattc ttcaccaatt ctatgagctt  
5221 cttcaggagt tattttatct ttctatcaa aagattgtat catatgataa gctaaattgt  
5281 ttgatttttt actataatct cctatcactt ctttacaagt ttcttctgct attttaaact  
5341 ctaaataatgc agtttcaggg gcacaattc cccacttac taataacttt ccatcagttt  
5401 tgctttcatc cattatataa tctaagctt tttttaatgt tgacttgata gatttgattt  
5461 tagtaactgc catacctgtt caagctctcc ttttaactct ttatatcat cttcataaat  
5521 tctatttggt tcatgttctc ttttagcaat ttgatttata ttaaccccaa ttttattaat  
5581 ctctttaatt aaatttttta ttgtagtata atccgttttt actacatacc catctattaa  
5641 catctttctt gcatatgctc caaagttatc tgttctaac tgtttcattt tttctttat  
5701 tattttatct tcttctcat tcacaaataa tttttttga atatcccttt ttctattagc  
5761 cataagttta tttctttct aaaaataaat catttatgat ttattctatt gggggtttgg  
5821 gggatccct caacaagtaa ttttaaaatt aaagtttctt ttttaattta aaattaaagt  
5881 gatgtgtgta cacactcact atgcttgcta cccttctta tacctcttat tatacttttt  
5941 aggaaaaagc atttcaaaa aaaagactag taattttttt accagtcttt atctttatat  
6001 ttataactaa tgccatactc cacgttctat atttacgaaa atattaggat atatctgcaa  
6061 tgtttgtctt atcttagctt tccaatttgg attattatat gtctttttat atcttctaa  
6121 actcttatat aacttctcta agtttaccct ccccctaaa ctttcaattg ttgaagcaac

6181 aaggctttc caagtaacct ttaaactatc tcttaaatcc attttcccc ttttgtaat  
6241 catgtaatct aaaattaaag gctcatcttt tctaagtatt aaacaatatt catgtgctat  
6301 tttataaaa ttttcattaa aatattttct atgattgctc atacaattat gttgttcttt  
6361 aattactatt tgctctacag ttctaattt atccatatct aaaagcattg aatataatt  
6421 atgattcttt tttacatcag ccatcaatat tgccattctt cctccaactt tcaaactcgc  
6481 atattgttt gataggcaat aattaatagc tttataaac tcttgataat cttaatatg  
6541 agataaatca ttttcaaag gtgtatctcc atacatatga ccactatact taataatata  
6601 ccaataaggt ggatgccaat atatgaaatt gtttctttct ttaatatcat ttctattaa  
6661 atcaaatttt gtttcttct ctttcaatcc atttaaataca taacaattag ttattatcc  
6721 tagtttttt cctacatcat cagttgtaaa acttccactc atataatcac ttattcatc  
6781 aaattataa atttatgta ggtcaattaa taatttctt gttgcattc ccctatatt  
6841 attatctcca tattcccctc tagttggata agaaactata ctattcattg ttaaaatctc  
6901 cttttatttt ttattattt aagaaaaggt gttcccagg aacaccttt taaaattagt  
6961 attcttcagg aagtaagata gttattaata aactctttat tgaataatca tactcactca  
7021 taatccaaat tttatgtcca tttatcatat agactcccat aaatctatct tcatatttg  
7081 aattaggatt ttttaataat tcatttgaa attctttatc ctcattacat aaaattcccc  
7141 aatcatcaga atggaatfff aataaagctg acattaaatc tttgtctta aattcccac  
7201 tttcaattaa ataattaact ccatttgca taactactct caattcata aatagcacct  
7261 ttcctttctt gttgtttgt tttttgtg agcctaagac tacatattgg agtgagtgt  
7321 aaaggaaaat ggaataaaaa atttggctg ctattcttg taaggatcat agccgacaaa  
7381 aattttatg gaatggctt acaactgaa cggaaatag ataggctgt gttcaaaaa  
7441 aacataaaa ataaaaaga agtcctaag gactcttac cttttgatt tattagacta  
7501 ataatttaa atcaatcaa tcaccaaca tattacttat atcgtctata gttcattaa  
7561 tagaattata tttataactt ctttcattt taaaattat ataccaccaa ctgctctat  
7621 aatattcaac ttctataaat acaagttcat ttttaataga atttctgct ctaaattcac  
7681 aaatftttt tctcataata ttaccttct taactatact taatctctcc aatattttt  
7741 cttatatcta tgaagtcct caaagtcct tgtttcattt actttatcac aatattctt  
7801 ataggttaa agtacatata tactcatttc tattctcctt tactttaggc aaacaatgag  
7861 ttataatctt attgtgagta aggtgtaac tcattgtta tgccttttt tatttataca  
7921 attcctttt cttttaaact tgtataatca tcaccaatta ttaaattggtc taataattca  
7981 attcctaata aatcccctc gtccttaatt cttcgtgta tgaatatc ttcttactt  
8041 ggtgtagtgt cgccactgg gtgattatgt gccagtatta tacttgacgc attacttaga  
8101 atagcagggt taaaaactc tcttgggtga accacactag catttaatga acctatacat  
8161 atagtgctta tagatgttat tttatttta gtatctaag ttaataatac taaatgctct  
8221 ctatcaactc catctaaagta tcagatact atttataaa catcttagg tgaaccaata  
8281 ttcttattat ccacaagcat acttttact tttccatct taatagttac aatattaatt  
8341 ctgttcaaaa aatcaattcc tttctttta aattaacacc ctggtttaa atcccatgtg  
8401 ttgttgttt tttgtgagc ctaagactac atattggagt gattgttaa ggaatgta  
8461 ataaaaatt ttggctgcta actgcagatc cagttggccg acaaaaaatt ttatggaatg  
8521 gctttacaac ttgaacggaa atatgatagg ctggtgctc aaaaaacaa tataaaaaa  
8581 agaagtcca aaggacttct tacctattg gatgcactcc atcgggtacc cgcttatagt  
8641 aaaaataagt ttagttatc tttgcttag cttggtcgt cggtagatgg aacaagctaa  
8701 ggcaatagaa tatcttaact tattgaaacg ttataagtgg gtgatggggg gttcacttag  
8761 ataaagatac cacatcaatc ccacgctgac tttgtctaa ccgatacagc cggagggctg

8821 gataacaaga aaaggcggta tgcgccccgt ggaggggtag cgtaccgct tttctgtg  
8881 gggtttcaa agggggcaac gccccattt ggcacacgac ttgccaagc aaagtgtagt  
8941 gtgtatacg ctctgtcggc gttgccgtga aaatgccgtt gccgccgggg agggcaaggg  
9001 cattgaagc ggcaggaaaa cagggctgtg cttgctggc gtagagccgt aagcacaggt  
9061 ctggttcaa cagcagactg ggcgtatatg aaagccccg tcctctgtcc tacgtccga  
9121 cttgtggaca aagtgtccc aagtgtggc tacactccc gaaaagtaac aggacagcgg  
9181 gcaaccgtca aggctgaaat gaacgggctt acaccggcc ttgaccgca cccgccgtt  
9241 cgctgaatgg gtgaacaagg gcaccaatcc ctcaaagtgc ttggccgctc tctttgat  
9301 tttggagtgt tcttttctc ataattgaaa tggggggaa gccatttag ggctttccg  
9361 cttgattgc ccatcagca agccagacgg gacggcaac ggcggcgcg gaaatgcgct  
9421 gttcatcttg accgtgact ggctttgcta tttctgat aaatgaaatt tcgatttta  
9481 gaaatcgtt aagatagca tgcggctcca cttgaaatt tttctttac tgcaaaaaca  
9541 gcctcttga tagaataggt tgcgtttct ataacattc attcatatat cccaaatta  
9601 caaattgct cccacattg tctactaat tcaacattg ttttctgtc taatttgaa  
9661 cgtccacag ctggttcat agtttctt tttactggctc ttaaacaat atagtgtact  
9721 tcataatct ctgacaag ggtctccat ggttctaaa accacggccc gacaattca  
9781 tctacaatta catcatatc gccgaggca tagcgtttg cagctttaa aaaggctca  
9841 atgacaacta aattttgtc gttggactct ggtaatgcg gcggtattg tccttgctt  
9901 aaataatgaa aaaagtcgtc tgtgtcata tgcacagatt tatccatgtt cgattcttt  
9961 gcgacaatc acgcagtgt tgtcttct gttcccggc aacctgaa cacaataat  
10021 cttcttgat tcatctacat tctcctcgc aattcagatt taccgctc tttctgatt  
10081 tggagcgtt ctctctcaa gattgaaat ggcgggaagc catttaggg cttcccgc  
10141 ttgattgcc atcagcaaag acggggcgga ctgtcaacg cggcgattt atgcgcgtt  
10201 catctgacc gttgattgc cccgctaact ttgctactc gttctaagta attcctcaat  
10261 ttgtttttc atatattcta caagtccat cgcttctt tctactgtc cccattc  
10321 agacaaatt ccaataag cttccttgc cgtgttagc agggggggga atctcctc  
10381 caattttaa attaccatt ttgcggcaac atctttgtc gtgatttct ctgtactaa  
10441 agtaaaccac attcgtgata aggttaataa cacatttct tcatcacct taaagctga  
10501 aatcaacca ggtaaagaaa accgaattg tttttaatt tcgtgaaatg ggatagcggg  
10561 aataagctc ttgcttccg ccccttcaa agttatgcta tttttctg cttgccata  
10621 taaatcatt atatctgggt cattgcaggc ttgcgatat tctctgctt ccatctcc  
10681 ccttagccat tcaccataca tatactgaca ttttggcga aattgcaac gaacaatc  
10741 agattgattg ataatagta cctctaaagg tctttttca atacagccta cggagccaga  
10801 aattttcaat aattgcttg ttagatctg tctgattgaa ttactcaatt cttgttagt  
10861 aattatcagt atatctatat cactatctg acgcagcca ttcattgtt ctgaaccata  
10921 taaatatc ccaatatt gacctgtaa tatggttct gctattgaaa taactgatt  
10981 tactgtgtg ggaattcat ttatattcat

//
